# Supplementary material
Source: PubMed Central journal article supplement (PMC7318553)

## Supporting Information for

# Highly Diastereoselective Functionalization of Piperidines by Photoredox Catalyzed $\alpha$ -Amino C–H Arylation and Epimerization

Morgan M. Walker, Brian Koronkiewicz, Shuming Chen, K. N. Houk,\* James M. Mayer,\*  
and Jonathan A. Ellman\*

### Table of Contents

|                                                                                |      |
|--------------------------------------------------------------------------------|------|
| Supplemental Optimization Tables                                               | S2   |
| General Methods                                                                | S3   |
| Light Set Ups                                                                  | S5   |
| Preparation of Intermediates                                                   | S5   |
| Preparation of Products                                                        | S13  |
| Stereochemical Assignments                                                     | S21  |
| Epimerization Studies                                                          | S22  |
| Mechanistic Experiments on the formation of DCB $\bullet^-$ and Ir(ppy) $_3^+$ | S24  |
| DFT Calculations                                                               | S30  |
| X-Ray Crystallographic Data                                                    | S63  |
| References                                                                     | S134 |
| NMR Spectra                                                                    | S136 |

## Supplemental Optimization Tables

### I. Piperidine formation

Supplemental Optimization Table S1

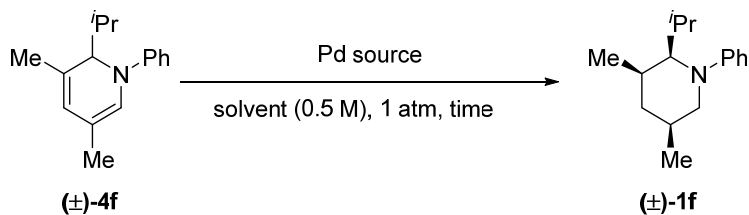

| Entry <sup>a</sup> | Pd Source (20 wt %)    | Solvent                  | Time (h) | % Yield 1f <sup>b</sup> |
|--------------------|------------------------|--------------------------|----------|-------------------------|
| 1                  | Pd/C                   | EtOH                     | 4        | 69                      |
| 2                  | Pd/C                   | EtOH                     | 14       | 72                      |
| 3                  | Pd/C                   | EtOH<br>+ 2.0 equiv AcOH | 4        | 47                      |
| 4                  | Pd(OH) <sub>2</sub> /C | EtOH                     | 4        | 42                      |
| 5                  | Pd(OH) <sub>2</sub> /C | EtOH                     | 14       | 68                      |
| 6                  | PtO <sub>2</sub>       | EtOH                     | 4        | 47                      |
| 7                  | Pd/C                   | THF                      | 4        | 72 (74%) <sup>c</sup>   |

<sup>a</sup>Conditions: 0.2 mmol of **4f**, Pd Source (20 wt %), solvent (0.5 M), stir at 1000 rpm. <sup>b</sup>Yields determined by crude <sup>1</sup>H NMR analysis with 2,6-dimethoxytoluene as an external standard. <sup>c</sup>Isolated yield from silica gel chromatography.

### II. Reaction conditions

Supplemental Optimization Table S2

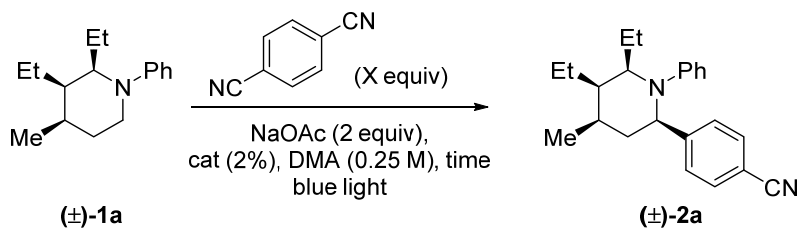

| Entry <sup>a</sup> | Catalyst (2 mol %)                                                        | Cyanoarene Equiv | Time (h) | % Yield 2a <sup>b</sup> |
|--------------------|---------------------------------------------------------------------------|------------------|----------|-------------------------|
| 1                  | Ir(ppy) <sub>3</sub>                                                      | 1.0              | 16       | 61                      |
| 2                  | Ir(ppy) <sub>3</sub>                                                      | 2.0              | 16       | 79                      |
| 3                  | Ir(ppy) <sub>3</sub>                                                      | 2.0              | 72       | 78                      |
| 4                  | [Ir(dtbbpy)(ppy) <sub>2</sub> ] <sup>+</sup> PF <sub>6</sub> <sup>-</sup> | 2.0              | 16       | 73                      |
| 5                  | No cat <sup>c</sup>                                                       | 2.0              | 16       | 10                      |
| 6                  | Ir(ppy) <sub>3</sub><br>(no light)                                        | 2.0              | 16       | <5                      |
| 7                  | Ir(ppy) <sub>3</sub><br>(set up in air)                                   | 1.0              | 16       | <5 (decomp)             |

<sup>a</sup>Conditions: 0.06 mmol of **1a**, handmade blue light setup. <sup>b</sup>Yields determined by crude <sup>1</sup>H NMR analysis with 2,6-dimethoxytoluene as an external standard. <sup>c</sup>Glassware cleaned with aqua regia prior to use.

### Supplemental Optimization Table S3

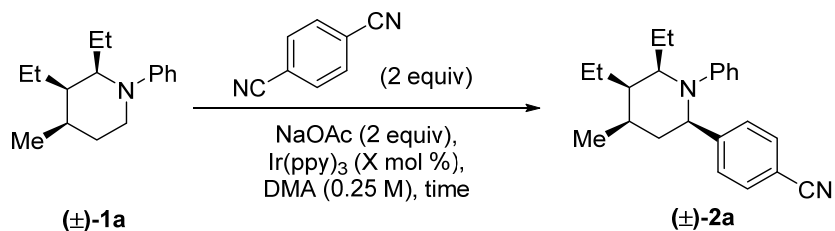

| Entry <sup>a</sup> | Scale (mmol) | Ir(ppy) <sub>3</sub> (X mol %) | Time (h) | % Yield 2a <sup>b</sup> |
|--------------------|--------------|--------------------------------|----------|-------------------------|
| 1                  | 0.06         | 2                              | 16       | 79                      |
| 2                  | 0.2          | 1                              | 16       | 78                      |
| 3                  | 0.2          | 1                              | 2        | 83 (86) <sup>c</sup>    |

<sup>a</sup>Conditions: **1a** is the limiting reagent. Photoreactor 50% LED. <sup>b</sup>Yields determined by crude <sup>1</sup>H NMR analysis with 2,6-dimethoxytoluene as an external standard. <sup>c</sup>Isolated yield from silica gel chromatography.

### Table S4. Unsuccessful reactants

Examining other arene coupling partners:

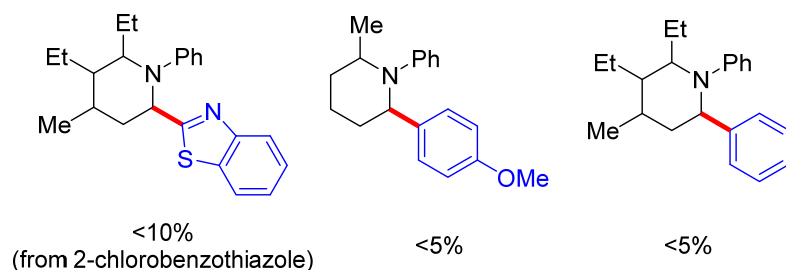

Examining additional N-substituents

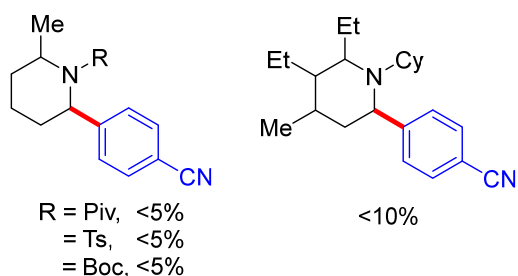

### General Methods

For air-sensitive reactions, glassware was dried at 150 °C for at least 12 h and allowed to cool under an inert atmosphere. Air-sensitive experiments were set up inside a Vacuum Atmospheres glovebox under nitrogen atmosphere with oxygen and moisture levels not exceeding 10 ppm. All photoredox catalyzed reactions were set up on the bench top and subsequently were submitted to 3 freeze/pump/thaw cycles in the dark. Solvents for air-sensitive reactions were dried by passing through activated alumina, degassed and stored over 3 Å molecular sieves in a glove box. Dimethylacetamide was distilled prior to use over BaO under reduced pressure and stored in a Schlenk flask on the benchtop. Solvents of ACS reagent grade were used for work-up and purification. Alkynes and liquid amines were distilled under a nitrogen atmosphere or *in vacuo*, and stored in a glovebox prior to use.

$\text{Ir}(\text{ppy})_3$  was purchased from Strem and stored in a desiccator. Stock solutions of the  $\text{Ir}(\text{ppy})_3$  catalyst were prepared by dissolving  $\text{Ir}(\text{ppy})_3$  (2.5 mg, 3.8  $\mu\text{mol}$ ) in 150  $\mu\text{L}$  of DMA and were used immediately.  $[\text{Ir}(\text{dtbbpy})(\text{ppy})_2]\text{PF}_6$  was purchased from Strem and stored in a desiccator. Stock solutions of the  $[\text{Ir}(\text{dtbbpy})(\text{ppy})_2]\text{PF}_6$  catalyst were prepared by dissolving  $[\text{Ir}(\text{dtbbpy})(\text{ppy})_2]\text{PF}_6$  (5.0 mg, 5.5  $\mu\text{mol}$ ) in 220  $\mu\text{L}$  of DMA and were used immediately. Sodium acetate ( $\text{NaOAc}$ ) was crushed with a mortar and pestle, then dried at 130  $^\circ\text{C}$  overnight and stored in a desiccator. 1,4-Dicyanobenzene and 4-cyanopyridine were crushed with a mortar and pestle prior to use.  $[\text{RhCl}(\text{coe})_2]_2$  was purchased from Strem and stored inside an  $\text{N}_2$ -filled glovebox at -25  $^\circ\text{C}$ . The ligand, *p*- $\text{Me}_2\text{N}-\text{C}_6\text{H}_4-\text{PEt}_2$ , was purchased from Sigma-Aldrich and stored inside an  $\text{N}_2$ -filled inert atmosphere glovebox at -25  $^\circ\text{C}$ . Stock solutions of the rhodium catalyst were prepared by dissolving  $[\text{RhCl}(\text{coe})_2]_2$  (200 mg, 279  $\mu\text{mol}$ ) and *p*- $\text{Me}_2\text{N}-\text{C}_6\text{H}_4-\text{PEt}_2$  (117 mg, 558  $\mu\text{mol}$ ) in anhydrous toluene until a total volume of 6.0 mL was reached. Stock solutions could be used immediately after mixing, and showed no difference in catalytic activity after being stored for months in a -25  $^\circ\text{C}$  freezer inside an  $\text{N}_2$ -filled glovebox.

Flash-column chromatography was performed with Sorbent Technologies 40-63  $\text{\AA}$  silica (230-400 mesh). Preparative thin-layer chromatography was carried out with plates from Analtech (1 mm  $\text{SiO}_2$ , 20 x 20 cm). Reverse phase chromatography was performed with a Teledyne Isco automated chromatography system using C18 gold columns. The products were visualized on TLC by UV or through staining with  $\text{KMnO}_4$ . NMR characterization was performed on either a 400, 500, or 600 MHz instrument. NMR data are reported in the following format: chemical shift in ppm, multiplicity (s = singlet, br s = broad singlet, d = doublet, t = triplet, q = quartet, m = multiplet, dd = doublet of doublets, etc.), coupling constant *J* in Hz, and integration. All spectra were referenced against residual solvent peaks ( $^1\text{H}$ : 7.26 ppm for  $\text{CDCl}_3$ ;  $^{13}\text{C}$ : 77.0 ppm for  $\text{CDCl}_3$ , 206.3 for  $(\text{CD}_3)_2\text{CO}$ ). IR spectra were obtained using FT-IR instruments. Melting points are reported uncorrected. High resolution mass spectra (HRMS) were obtained using electrospray ionization (ESI) on a time-of-flight (TOF) mass spectrometer.

Spectroelectrochemistry experiments were done in a 3-electrode setup in a (10 X 2) mm cuvette, using conductive contacts and fiber optic cables to take measurements in an  $\text{N}_2$ -glovebox. Electrochemistry data was collected with a CH Instruments potentiostat (model 600D) using a Pt-mesh working electrode, a platinum wire auxiliary electrode, and a Ag/AgCl pseudoreference electrode in 0.1M  $[\text{n-Bu}_4\text{N}][\text{PF}_6]$  DMA. Absorbance measurements were recorded on a Cary 60 UV-Vis (Agilent), through the short pathlength of the cuvette after holding the electrode a potential which oxidizes  $\text{Ir}(\text{ppy})_3$ . The Pt-mesh working electrode was carefully kept in the short pathlength portion of the cuvette while the auxiliary and reference electrodes were submerged in the electrolyte solution near the top of the cuvette.

Time-correlated single photon counting (TCSPC) measurements were taken on a HORIBA Jobin Yvon TD-Fluor Fluorolog-3 fluorimeter using a HORIBA 390 nm NanoLED excitation pulse and measuring emission at 530 nm. Measurements were taken with 60 $\mu\text{M}$   $\text{Ir}(\text{ppy})_3$  in DMA unless otherwise noted. Solutions were prepared in an  $\text{N}_2$  glovebox in 10 x 2 mm cuvettes having an air-tight Kontes adapter, with excitation in the 10 mm path and fluorescence measured from the 2mm path. Data analysis and fitting was done with Igor Pro 8 software package.

Transient absorption spectroscopy was performed a previously reported setup.<sup>1</sup> Excitation was provided by a Spectra-Physics Nd/YAG laser (Quanta-Ray) and basiScan OPO at 430nm. Absorbance changes were monitored at a 90 $^\circ$  angle to the excitation beam using an Edinburgh Instruments Xe900 xenon lamp and an LP920-K UV-Vis detector. The excitation power measured and optimized before measurements. Typical powers were between 6-8 mJ/pulse.

## Light Set ups

### I. Handmade light setup

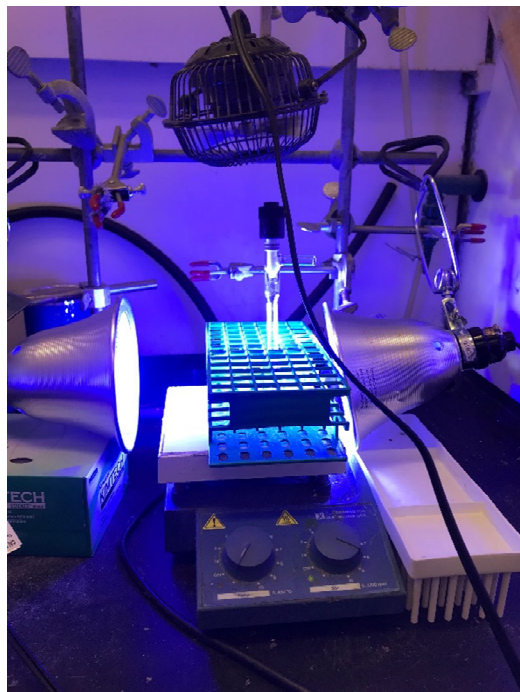

Schlenk flasks were used for all optimization reactions and placed in a test tube rack on a stir plate. A fan was placed overhead to keep the area cool from the lights. The lights were bought from Amazon – ABI LED Aquarium Light Bulb, 23 W Blue and White PAR 38. Two lights were used and placed on either side of the Schlenk flask – one 5 cm from the Schlenk flask, the other 13 cm from the Schlenk flask. The stir rate was >1000 rpm.

### II. Photoreactor

The Penn Optical Coatings Photoreactor (<http://www.pennoc.com/photo-reactor/>) was used for the scope and epimerization studies. The 450 nm light source was used. The touch screen on the photoreactor was used to set the light source to 50% LED for all reactions, set the stir rate to 1000 rpm, and set the fan to 6800 rpm. Schlenk flasks were used for all reactions that measured 12 cm tall with the Teflon cap on.

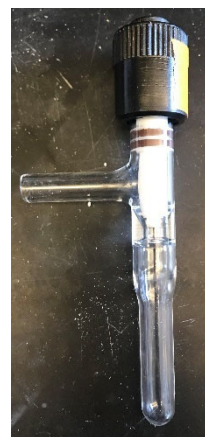

## Preparation of Intermediates

### I. Imines

Imines: (1*E*,2*E*)-*N*,3-diphenylprop-2-en-1-imine, (1*E*,2*E*)-2-methyl-*N*-phenylbut-2-en-1-imine were prepared according to previous literature procedures.<sup>2</sup>

### General Procedure A for the preparation of imines:

The following protocol is adapted from a literature procedure.<sup>3</sup> A round-bottom flask equipped with a stir bar was charged with enal (1.0 equiv), dry tetrahydrofuran (THF) (0.7 M), titanium(IV) ethoxide (2.0 equiv), and aniline (1.0 equiv). The flask was put under an N<sub>2</sub> atmosphere and stirred for 1 h at rt. The reaction mixture was diluted with diethyl ether (Et<sub>2</sub>O), and saturated sodium bicarbonate was added to the mixture. A white precipitate formed and the mixture was filtered over celite and washed with Et<sub>2</sub>O. The filtrates were poured into a separatory funnel, and the layers were separated. The organic layer was washed with brine, dried over Mg<sub>2</sub>SO<sub>4</sub>, filtered and concentrated *in vacuo*. The residue was filtered through basic Al<sub>2</sub>O<sub>3</sub> (eluent: pentane), and the filtrate was concentrated *in vacuo* to give imine **3** which was stored at -25 °C under an N<sub>2</sub> atmosphere in a glovebox.

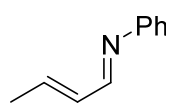

**3a:** General Procedure A was followed using (*E*)-but-2-enal (1.2 mL, 15 mmol, 1.0 equiv), dry THF (21 mL, 0.7 M), titanium(IV) ethoxide (7.3 mL, 30 mmol, 2.0 equiv) and aniline (1.4 mL, 15 mmol, 1.0 equiv). Filtration through Al<sub>2</sub>O<sub>3</sub> (eluent: pentane) provided imine **3a** as a pale yellow oil (436 mg, 20%). Spectroscopic data are in agreement with reported values.<sup>4</sup>

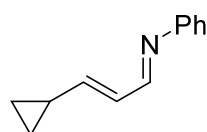

**3b:** General Procedure A was followed using (*E*)-3-cyclopropylprop-2-enal (2.24 g, 23.3 mmol, 1.0 equiv), dry THF (33 mL, 0.7 M), titanium(IV) ethoxide (11.5 mL, 46.6 mmol, 2.0 equiv) and aniline (2.21 mL, 23.3 mmol, 1.0 equiv). Filtration through Al<sub>2</sub>O<sub>3</sub> (eluent: pentane) provided imine **3b** as a pale yellow oil (691 mg, 17%). Material must be used immediately – decomposition occurs. <sup>1</sup>H NMR (400 MHz, Chloroform-*d*) δ 8.01 (d, *J* = 9.1 Hz, 1H), 7.36 – 7.32 (m, 2H), 7.20 – 7.16 (m, 1H), 7.11 – 7.09 (m, 2H), 6.51 (dd, *J* = 15.4, 9.1 Hz, 1H), 5.92 (dd, *J* = 15.4, 9.5 Hz, 1H), 1.71 – 1.62 (m, 1H), 1.00 – 0.95 (m, 2H), 0.66 – 0.62 (m, 2H).

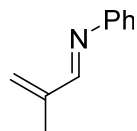

**3e:** General Procedure A was followed using 2-methylprop-2-enal (1.6 mL, 20 mmol, 1.0 equiv), dry THF (29 mL, 0.7 M), titanium(IV) ethoxide (8.4 mL, 40 mmol, 2.0 equiv) and aniline (1.9 mL, 20 mmol, 1.0 equiv). Filtration through Al<sub>2</sub>O<sub>3</sub> (eluent: pentane) provided imine **3e** as a pale yellow oil (1.53 g, 54%). Spectroscopic data are in agreement with reported values.<sup>5</sup>

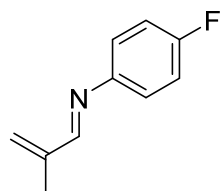

**3i:** General Procedure A was followed using 2-methylprop-2-enal (828 μL, 10.0 mmol, 1.00 equiv), dry THF (14 mL, 0.7 M), titanium(IV) ethoxide (4.9 mL, 20 mmol, 2.0 equiv) and 4-fluoroaniline (947 μL, 10 mmol, 1.0 equiv). Filtration through Al<sub>2</sub>O<sub>3</sub> (eluent: pentane) provided imine **3i** as a pale yellow oil (599 mg, 37%). IR (neat): 2964, 1607, 1499, 1226, 1198, 913, 828, 776 cm<sup>-1</sup>. <sup>1</sup>H NMR (600 MHz, Chloroform-*d*) δ 8.07 (s, 1H), 7.11 – 7.01 (m, 4H), 5.77 (s, 1H), 5.59 (s, 1H), 2.05 (s, 3H). <sup>13</sup>C NMR (101 MHz, Chloroform-*d*) δ 163.2, 161.1 (d, *J* = 244.2 Hz), 148.1, 144.1, 126.7, 122.2 (d, *J* = 8.3 Hz), 115.7 (d, *J* = 22.5 Hz), 16.8. <sup>19</sup>F NMR (376 MHz, Chloroform-*d*) δ -117.7 – -117.8 (m).

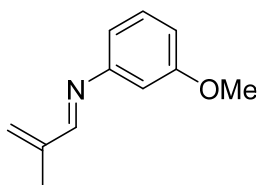

**3j:** A modification to General Procedure A was followed using 2-methylprop-2-enal (828 μL, 10.0 mmol, 1.00 equiv), dry THF (14 mL, 0.7 M), titanium(IV) ethoxide (4.9 mL, 20 mmol, 2.0 equiv) and 3-methoxyaniline (1.1 mL, 10 mmol, 1.0 equiv). Following work-up, the crude was not filtered and directly gave approximately 80-90% pure imine **3j** (1.04 g, 60%) as a yellow oil. IR (neat): 2957, 2835, 1591, 1480, 1261, 1160, 1143, 1038, 753, 687 cm<sup>-1</sup>. <sup>1</sup>H NMR (600 MHz, Chloroform-*d*) δ 8.09 (s, 1H), 7.27 – 7.24 (m, 1H), 6.77 – 6.75 (m, 1H), 6.70 – 6.67 (m, 2H), 5.77 (s, 1H), 5.59 (s, 1H), 3.82 (s, 3H), 2.06 (s, 3H). <sup>13</sup>C NMR (151 MHz, Chloroform-*d*) δ 163.6, 160.2, 153.6, 144.1, 129.8, 126.8, 112.8, 111.6, 106.5, 55.3, 16.8.

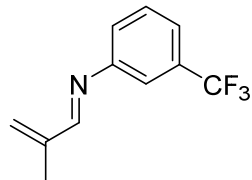

**3k:** General Procedure A was followed using 2-methylprop-2-enal (828 μL, 10.0 mmol, 1.00 equiv), dry THF (14 mL, 0.7 M), titanium(IV) ethoxide (4.9 mL, 20 mmol, 2.0 equiv) and 3-(trifluoromethyl)aniline (1.3 mL, 10 mmol, 1.0 equiv). Filtration through Al<sub>2</sub>O<sub>3</sub> (eluent: pentane) provided imine **3k** as a pale yellow oil (710 mg, 33%). IR (neat): 2958, 1612, 1439, 1323, 1162, 1119, 1065, 900, 795, 697 cm<sup>-1</sup>. <sup>1</sup>H NMR (600 MHz, Chloroform-*d*) δ 8.08 (s, 1H), 7.47 – 7.44 (m, 2H), 7.35 – 7.34 (m, 1H), 7.27 – 7.25 (m, 1H), 5.83 (s, 1H), 5.64 (s, 1H), 2.06 (s, 3H). <sup>13</sup>C NMR (151 MHz, Chloroform-*d*) 164.8, 152.6, 143.9, 131.5 (q, *J* = 32.3 Hz), 129.5, 127.8, 124.02, 123.99 (q, *J* = 272.5 Hz), 122.2 (q, *J* = 3.7 Hz), 117.7 (q, *J* = 3.8 Hz), 16.7. <sup>19</sup>F NMR (376 MHz, Chloroform-*d*) δ -62.7.

## II. Alkynes

### General Procedure B for the preparation of alkynes:

The following protocol is adapted from a literature procedure.<sup>6</sup> A flame dried 250-mL round-bottom flask equipped with a stir bar was placed under N<sub>2</sub> and charged with the terminal alkyne (1.0 equiv) and dry THF (0.3 M total concentration). The mixture was cooled to -78 °C and *n*-BuLi (2.1 M in hexanes, 1.0 equiv) was added dropwise. The reaction mixture was slowly warmed to rt, then MeI (1.5 equiv) was added dropwise. The reaction mixture was stirred overnight at rt. The reaction was quenched with water (100 mL), and the resulting solution was diluted with diethyl ether (Et<sub>2</sub>O) (100 mL), and the layers were separated. The organic layer was additionally washed with water (50 mL) followed by brine (50 mL), dried over MgSO<sub>4</sub> and concentrated *in vacuo*. The crude residue was purified via silica gel chromatography to provide the product **alkyne**.

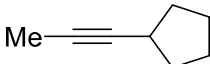 **alkyne a:** General procedure B was followed using ethynylcyclopentane (3.0 g, 32 mmol, 1.0 equiv) dissolved in 92 mL of THF, *n*-BuLi (2.1 M in hexanes, 15 mL, 32 mmol, 1.0 equiv) and MeI (3.0 mL, 48 mmol, 1.5 equiv). Purification by silica gel chromatography (eluent: pentane) provided the product **alkyne a** (1.61 g, 47%) as a clear oil. IR (neat): 2957, 2870, 1451, 1345 cm<sup>-1</sup>. <sup>1</sup>H NMR (600 MHz, Chloroform-*d*) δ 2.56 – 2.51 (m, 1H), 1.91 – 1.85 (m, 2H), 1.79 (d, *J* = 2.4 Hz, 3H), 1.73 – 1.68 (m, 2H), 1.57 – 1.50 (m, 4H). <sup>13</sup>C NMR (126 MHz, Chloroform-*d*) δ 83.6, 74.9, 34.0, 30.3, 24.9, 3.6. HRMS-EI (*m/z*): [*M*] calcd for [C<sub>8</sub>H<sub>12</sub>], 108.0939; found, 108.0943.

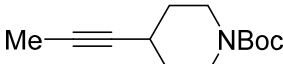 **alkyne b:** General procedure B was followed using *tert*-butyl 4-ethynylpiperidine-1-carboxylate (1.0 g, 4.8 mmol, 1.0 equiv) dissolved in 14 mL of THF, *n*-BuLi (2.1 M in hexanes, 2.3 mL, 4.8 mmol, 1.0 equiv) and MeI (450 μL, 7.2 mmol, 1.5 equiv). Purification by silica gel chromatography (eluent 1:10:89 NEt<sub>3</sub>/EtOAc/hexanes) provided the product **alkyne b** (663 mg, 62%) as a clear oil. Spectroscopic data are in agreement with reported values.<sup>6</sup>

## III. Dihydropyridines

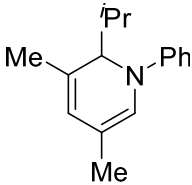 **(±)-4f:** The following protocol is based on a literature procedure.<sup>3</sup> In an N<sub>2</sub>-filled glove box, a 20-mL vial was charged with imine **3e** (576 mg, 3.97 mmol, 1.00 equiv). Rh stock solution (see General Methods) (2.1 mL, 0.20 mmol, 5 mol %) was added to the vial, and the contents were transferred to a Schlenk flask. The vial was rinsed with toluene (0.5 mL x 2), and the washings were likewise transferred to the Schlenk flask. 4-Methylpent-2-yne (550 μL, 4.8 mmol, 1.2 equiv) was added to the Schlenk flask and toluene (5 mL) was added. The contents were thoroughly mixed and *ca.* 0.6 mL was removed by pipet and transferred to a J. Young NMR tube equipped with a C<sub>6</sub>D<sub>6</sub> capillary (for locking and shimming). The Schlenk flask and the J. Young tube were capped and then taken to a fume hood where they were heated to 100 °C for 24 h, at which point analysis by <sup>1</sup>H NMR of the J. Young tube indicated complete conversion to the 1,2-dihydropyridine. The crude reaction mixture was then concentrated *in vacuo* and filtered through buffered silica gel (pre-treated with 10:90 NEt<sub>3</sub>/pentane) overnight; eluent: 1:99 NEt<sub>3</sub>/pentane) to give the indicated DHP **4f** (869 mg, 96%) as a pale yellow oil which was stored at -25 °C under an N<sub>2</sub> atmosphere in a glovebox. IR (neat): 2955, 2927, 1584, 1498, 1380, 1297, 1228, 1033, 967, 847, 746, 691 cm<sup>-1</sup>. <sup>1</sup>H NMR (500 MHz, Chloroform-*d*) δ 7.28 – 7.25 (m, 2H), 6.95 – 6.94 (m, 2H), 6.87 – 6.84 (m, 1H), 6.07 (s, 1H), 5.72 (s, 1H), 3.96 (dd, *J* = 7.6, 1.6 Hz, 1H), 2.10 – 2.03 (m, 1H), 1.87 (s, 3H), 1.84 (s, 3H), 1.03 (d, *J* = 6.8 Hz, 3H), 0.97 (d, *J* = 6.9 Hz, 3H). <sup>13</sup>C NMR (126 MHz, Chloroform-*d*) δ 146.9, 129.0, 126.2, 122.3, 121.2, 119.3, 115.4, 114.9, 65.3, 31.6, 23.4, 20.9, 19.0, 17.6. HRMS-ESI (*m/z*): [*M*+H]<sup>+</sup> calcd for [C<sub>16</sub>H<sub>21</sub>N+H]<sup>+</sup>, 228.1747; found, 228.1752.

## IV. Piperidines

### General procedure C for the formation of piperidines on small scale:

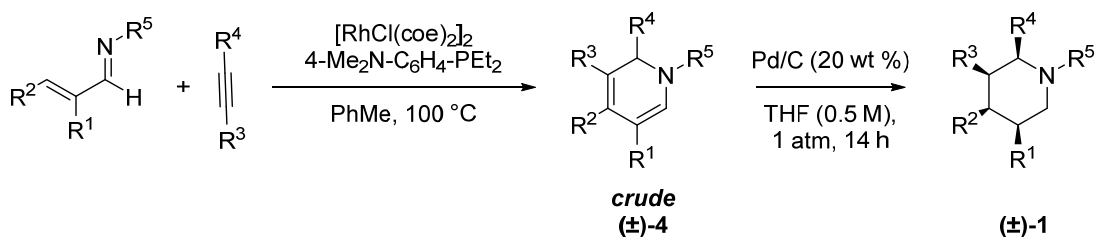

In an N<sub>2</sub>-filled glove box, a 4-mL vial was charged with the indicated imine (1.0 equiv). Rh stock solution (see General Methods) was added to the vial, and the contents were transferred to a J. Young NMR tube equipped with a C<sub>6</sub>D<sub>6</sub> capillary (for locking and shimming). The vial was rinsed with toluene (0.1 mL x 2), and the washings were likewise transferred to the J. Young tube. Alkyne (1.5 equiv) was added to the J. Young tube, and toluene was added until the total volume reached ca. 0.6 mL. The J. Young tube was quickly capped, and the contents were thoroughly mixed. The J. Young tube was then taken to a fume hood where it was heated to 100 °C for 24 h, at which point analysis by <sup>1</sup>H NMR often indicated complete conversion to the 1,2-dihydropyridine. If incomplete conversion was observed, the J. Young tube was taken back into the glove box where an additional amount of Rh stock solution was added directly. The J. Young tube was then taken to a fume hood where it was heated to 100 °C for 24 h. The addition of Rh stock solution was continued every 24 h until complete conversion to the 1,2-dihydropyridine was observed by <sup>1</sup>H NMR. The crude reaction mixture was then concentrated *in vacuo* and filtered through buffered silica gel (pre-treated with 10:90 NEt<sub>3</sub>/pentane overnight; eluent: 1:99 NEt<sub>3</sub>/pentane) to give the indicated DHP **4**. The entire crude DHP **4** was then taken onto the hydrogenation reaction by transferring the crude product with THF (0.5 M, sparged for 15 minutes prior to use) to a 4-mL vial equipped with a magnetic stir bar. Pd/C (20 wt %, based on theoretical yield of DHP **4**) was then added to the solution and the vial was purged with N<sub>2</sub> for 5 min. The vial was then purged with an H<sub>2</sub> balloon three times, and then electrical tape and Parafilm were used to seal the vial. The reaction mixture was then stirred at 1000 rpm for 14 h under an H<sub>2</sub> atmosphere (1 atm). The H<sub>2</sub> balloon was removed and the heterogeneous mixture was filtered over Celite (eluent: diethyl ether) and concentrated *in vacuo*. The crude product was then purified by silica gel column chromatography to give the indicated product. Yield indicates overall yield from the starting imine **3**.

### General procedure D for the formation of piperidines on larger scale:

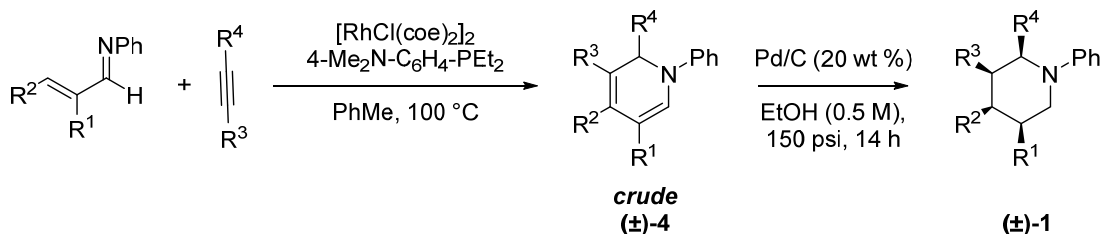

In an N<sub>2</sub>-filled glove box, a 20-mL vial was charged with the indicated imine (1.0 equiv). Rh stock solution (see General Methods) was added to the vial, and the contents were transferred to a Schlenk flask. The vial was rinsed with toluene (0.5 mL x 2), and the washings were likewise transferred to the Schlenk flask. Alkyne (1.2 equiv) was added to the Schlenk flask, and toluene was added until the total concentration reached ca. 0.5 M. The contents were thoroughly mixed and ca. 0.6 mL was removed by pipet and transferred to a J. Young NMR tube equipped with a C<sub>6</sub>D<sub>6</sub> capillary (for locking and shimming). The Schlenk flask and the J. Young tube were capped and then taken to a fume hood where they were heated to 100 °C for 24 h, at which point analysis by <sup>1</sup>H NMR of the J. Young tube indicated complete conversion to the 1,2-dihydropyridine. The crude reaction mixture was then concentrated *in vacuo* and filtered through buffered silica gel (pre-treated with 10:90 NEt<sub>3</sub>/pentane overnight; eluent: 1:99 NEt<sub>3</sub>/pentane) to give the indicated DHP **4**. The entire crude DHP **4** was then taken onto the hydrogenation reaction by transferring the crude product with EtOH (sparged for 15 min prior to use) to a 20-mL vial equipped with a magnetic stir bar. Pd/C (20 wt %, based on mass of crude mixture) was then added to the solution, and the vial was placed in a Parr reactor. The Parr reactor was purged with H<sub>2</sub>, then pressurized to ~150 psi. After stirring for 14 h at 1000 rpm, the Parr reactor was opened and the heterogeneous mixture was filtered over Celite (eluent: diethyl ether) and concentrated



*in vacuo*. The crude product was then purified by C18 reverse phase chromatography to give the indicated product. Yield indicates overall yield from the starting imine **3**.

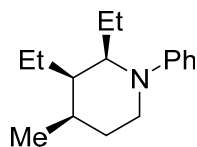

**(±)-1a**: General procedure D was followed using the imine **3a** (436 mg, 3.00 mmol, 1.00 equiv) and hexyne (409  $\mu$ L, 3.6 mmol, 1.20 equiv). Rh stock solution (798  $\mu$ L, 75.0  $\mu$ mol, 2.5 mol %) was added and the reaction was carried out for 24 h. Following concentration, 415 mg of a crude mixture was obtained and dissolved in EtOH (3.7 mL). Pd/C (83 mg, 20 wt % of crude mass) was then added to the crude mixture and hydrogenation was conducted per general procedure D. Purification by C18 reverse phase chromatography (0-100% CH<sub>3</sub>CN:H<sub>2</sub>O containing 0.1 % TFA) provided the product **1a** (177 mg, 25%, >95:5 *dr*) as a pale yellow oil. IR (neat): 2960, 2873, 1596, 1500, 1397, 1220, 1150, 942, 746, 690 cm<sup>-1</sup>. <sup>1</sup>H NMR (400 MHz, Chloroform-*d*)  $\delta$  7.22 – 7.18 (m, 2H), 6.91 – 6.89 (m, 2H), 6.72 – 6.68 (m, 1H), 3.56 – 3.52 (m, 1H), 3.33 (dt, *J* = 13.9, 4.1 Hz, 1H), 3.25 – 3.18 (m, 1H), 1.98 – 1.82 (m, 2H), 1.75 – 1.69 (m, 1H), 1.67 – 1.48 (m, 2H), 1.44 – 1.32 (m, 3H), 1.02 (d, *J* = 7.4 Hz, 3H), 0.91 (t, *J* = 7.5 Hz, 3H), 0.86 (t, *J* = 7.3 Hz, 3H). <sup>13</sup>C NMR (151 MHz, Chloroform-*d*)  $\delta$  151.4, 129.0, 117.3, 116.0, 63.0, 42.9, 39.0, 30.6, 30.0, 22.9, 21.5, 15.5, 13.1, 12.3. HRMS-ESI (*m/z*): [M+H]<sup>+</sup> calcd for [C<sub>16</sub>H<sub>25</sub>N+H]<sup>+</sup>, 232.2060; found, 232.2065.

**(±)-1b + (±)-1c**: A modification to General procedure D was followed using the imine **3b** (2.93 g, 17.1 mmol, 1.00 equiv) and 3-hexyne (2.3 mL, 20.5 mmol, 1.20 equiv). Rh stock solution (9.1 mL, 0.86 mmol, 5 mol %) was added. After 24 h, <sup>1</sup>H NMR analysis indicated complete conversion to a mixture of the cyclopropyl and propyl 1,2-dihydropyridine products. Following concentration, 297 mg of a crude mixture was obtained and dissolved in EtOH (2.3 mL). Pd/C (234 mg, 20 wt % of crude mass) was then added to the crude mixture and hydrogenation was conducted per general procedure D. Purification by C18 reverse phase chromatography (0-100% CH<sub>3</sub>CN:H<sub>2</sub>O containing 0.1 % TFA) provided each of the products separately [the isolated yield of each compound was not optimized; mixed fractions were discarded].

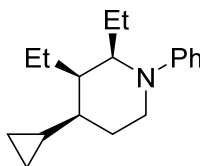

Isolated product **(±)-1b** (76.0 mg, 2% of pure isolated compound, >95:5 *dr*) as a pale yellow oil. IR (neat): 2959, 2872, 1596, 1499, 1377, 1254, 1155, 951, 746, 691 cm<sup>-1</sup>. <sup>1</sup>H NMR (600 MHz, Chloroform-*d*)  $\delta$  7.23 – 7.20 (m, 2H), 6.94 – 6.92 (m, 2H), 6.76 – 6.73 (m, 1H), 3.53 – 3.49 (m, 1H), 3.32 (dt, *J* = 13.6, 4.2 Hz, 1H), 3.29 – 3.24 (m, 1H), 1.81 – 1.76 (m, 2H), 1.69 – 1.64 (m, 2H), 1.63 – 1.58 (m, 1H), 1.56 – 1.51 (m, 2H), 0.95 – 0.88 (m, 2H), 0.94 (t, *J* = 7.5 Hz, 3H), 0.89 (t, *J* = 7.4 Hz, 3H), 0.59 – 0.55 (m, 1H), 0.44 – 0.39 (m, 1H), 0.26 – 0.22 (m, 1H), -0.05 – -0.09 (m, 1H). <sup>13</sup>C NMR (151 MHz, Chloroform-*d*)  $\delta$  151.5, 129.0, 117.9, 116.9, 63.4, 43.7, 42.7, 41.5, 29.5, 22.8, 21.6, 13.1, 13.0, 12.4, 6.1, 3.1. HRMS-ESI (*m/z*): [M+H]<sup>+</sup> calcd for [C<sub>18</sub>H<sub>27</sub>N+H]<sup>+</sup>, 258.2216; found, 258.2222.

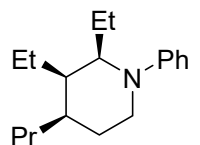

Isolated product **(±)-1c** (93.6 mg, 2% of pure isolated compound, >95:5 *dr*) as a pale yellow oil. IR (neat): 2957, 2871, 1596, 1500, 1377, 1248, 1127, 952, 746, 691 cm<sup>-1</sup>. <sup>1</sup>H NMR (600 MHz, Chloroform-*d*)  $\delta$  7.23 – 7.20 (m, 2H), 6.93 – 6.92 (m, 2H), 6.76 – 6.74 (m, 1H), 3.46 – 3.43 (m, 1H), 3.27 (dt, *J* = 13.6, 4.1 Hz, 1H), 3.18 – 3.14 (m, 1H), 1.77 – 1.65 (m, 3H), 1.57 – 1.29 (m, 8H), 1.24 – 1.16 (m, 1H), 0.94 (t, *J* = 7.2 Hz, 3H), 0.92 (t, *J* = 7.5 Hz, 3H), 0.86 (t, *J* = 7.4 Hz, 3H). <sup>13</sup>C NMR (151 MHz, Chloroform-*d*)  $\delta$  151.6, 129.0, 117.9, 116.9, 63.5, 43.2, 40.8, 36.4, 31.3, 27.4, 22.3, 21.6, 14.5, 12.8. HRMS-ESI (*m/z*): [M+H]<sup>+</sup> calcd for [C<sub>18</sub>H<sub>29</sub>N+H]<sup>+</sup>, 260.2373; found, 260.2378.

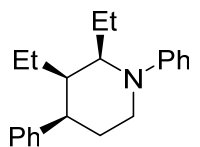

**(±)-1d**: General procedure C was followed using (1*E*,2*E*)-*N*,3-diphenylprop-2-en-1-imine (104 mg, 0.500 mmol, 1.00 equiv) and 3-hexyne (86  $\mu$ L, 0.75 mmol, 1.5 equiv). Rh stock solution (266  $\mu$ L, 25.0  $\mu$ mol, 5 mol %) was added at *t* = 0, 24, and 48 h. After 72 h, <sup>1</sup>H NMR analysis indicated complete conversion to the 1,2-dihydropyridine. Pd/C (29.0 mg, 20 wt % of theoretical yield) was then added to the crude mixture and hydrogenation was conducted per general procedure C. Purification by silica gel chromatography (eluent 1:99 NEt<sub>3</sub>:hexanes) provided the product **1d** (121 mg, 82%, >95:5 *dr*) as a pale yellow solid (mp: 43-45 °C). IR (neat): 2963, 2873, 1596, 1491, 1379, 1248, 1127, 974, 750, 696 cm<sup>-1</sup>. <sup>1</sup>H NMR (600 MHz, Chloroform-*d*)  $\delta$  7.35 – 7.30 (m, 6H), 7.24 – 7.21 (m, 1H), 7.16 – 7.14 (m, 2H), 7.12 – 7.10 (m, 1H), 3.26 – 3.23 (m, 1H), 3.01 – 2.96 (m, 2H), 2.87 – 2.84 (m, 1H), 2.24 – 2.17 (m, 1H), 1.98 – 1.97 (m, 1H), 1.79 – 1.77 (m, 1H), 1.64 – 1.57 (m, 1H), 1.31 – 1.22 (m, 3H), 0.80 (t, *J* = 7.4 Hz, 3H), 0.50 (t, *J* = 7.6 Hz, 3H). <sup>13</sup>C NMR (151 MHz, Chloroform-*d*)  $\delta$  152.6, 144.7, 128.6, 128.0, 127.5, 125.8, 125.5, 124.0, 68.7, 55.9, 46.2, 44.4, 25.8, 23.7, 17.3, 15.8, 11.2. HRMS-ESI (*m/z*): [M+H]<sup>+</sup> calcd for [C<sub>21</sub>H<sub>27</sub>N+H]<sup>+</sup>, 294.2216; found, 294.2222.

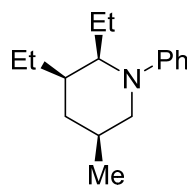

**(±)-1e:** General procedure D was followed using the imine **3e** (436 mg, 3.00 mmol, 1.00 equiv) and 3-hexyne (409  $\mu$ L, 3.6 mmol, 1.20 equiv). Rh stock solution (1.6 mL, 150  $\mu$ mol, 5 mol %) was added and the reaction was carried out for 24 h. Following concentration, 583 mg of a crude mixture was obtained and dissolved in EtOH (5.1 mL). Pd/C (117 mg, 20 wt % of crude mass) was then added to the crude mixture and hydrogenation was conducted per general procedure D. Purification by C18 reverse phase chromatography (0-100% CH<sub>3</sub>CN:H<sub>2</sub>O containing 0.1 % TFA) provided the product **1e** (345 mg, 50%, >95:5 *dr*) as a pale yellow oil. IR (neat): 2957, 2870, 1596, 1497, 1395, 1243, 1144, 992, 748, 689 cm<sup>-1</sup>.

<sup>1</sup>H NMR (600 MHz, Chloroform-*d*)  $\delta$  7.20 – 7.18 (m, 2H), 6.86 – 6.85 (m, 2H), 6.66 – 6.64 (m, 1H), 3.78 – 3.74 (m, 1H), 3.44 (dd, *J* = 13.8, 4.5 Hz, 1H), 2.61 (dd, *J* = 13.8, 11.6 Hz, 1H), 1.76 – 1.61 (m, 4H), 1.43 – 1.36 (m, 1H), 1.29 – 1.23 (m, 1H), 1.21 – 1.13 (m, 1H), 1.00 (apparent q, *J* = 12.4 Hz, 1H), 0.91 (t, *J* = 7.2 Hz, 3H), 0.90 (d, *J* = 6.9 Hz, 3H), 0.85 (t, *J* = 7.4 Hz, 3H). <sup>13</sup>C NMR (151 MHz, Chloroform-*d*)  $\delta$  151.4, 129.1, 116.4, 114.7, 59.9, 48.2, 40.4, 35.0, 29.7, 26.2, 19.3, 17.0, 11.7, 11.6. HRMS-ESI (*m/z*): [M+H]<sup>+</sup> calcd for [C<sub>21</sub>H<sub>25</sub>N+H]<sup>+</sup>, 232.2060; found, 232.2065.

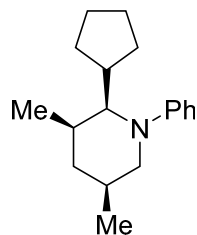

**(±)-1f:** General procedure C was followed using the imine **3e** (72.6 mg, 0.500 mmol, 1.00 equiv) and prop-1-ynylcyclopentane (81.1 mg, 0.750, 1.50 equiv). Rh stock solution (266  $\mu$ L, 25.0  $\mu$ mol, 5 mol %) was added at *t* = 0. After 24 h, <sup>1</sup>H NMR analysis indicated complete conversion to the 1,2-dihydropyridine. Pd/C (25.4 mg, 20 wt % of theoretical yield) was then added to the crude mixture and hydrogenation was conducted per general procedure C. Purification by silica gel chromatography (eluent 1:99 NEt<sub>3</sub>:hexanes) provided the product **1f** (94.7 mg, 74%, >95:5 *dr*) as a pale yellow oil. IR (neat): 2950, 2867, 1594, 1498, 1391, 1244, 1136, 991, 745, 689 cm<sup>-1</sup>. <sup>1</sup>H NMR (600 MHz, Chloroform-*d*)  $\delta$  7.19 – 7.16 (m, 2H), 6.80 – 6.78 (m, 2H), 6.62 – 6.59 (m, 1H), 3.57 (dd, *J* = 9.7, 4.6 Hz, 1H), 3.50

– 3.47 (m, 1H), 2.60 (dd, *J* = 14.0, 11.7 Hz, 1H), 2.36 – 2.28 (m, 1H), 1.96 – 1.87 (m, 2H), 1.79 – 1.73 (m, 1H), 1.72 – 1.60 (m, 3H), 1.55 – 1.51 (m, 2H), 1.40 – 1.15 (m, 4H), 0.92 (d, *J* = 7.1 Hz, 3H), 0.89 (d, *J* = 6.4 Hz, 3H). <sup>13</sup>C NMR (151 MHz, Chloroform-*d*)  $\delta$  150.8, 129.2, 115.7, 113.8, 65.0, 49.0, 38.0, 37.8, 34.0, 33.0, 31.3, 29.5, 26.2, 24.5, 20.2, 19.2. HRMS-ESI (*m/z*): [M+H]<sup>+</sup> calcd for [C<sub>18</sub>H<sub>27</sub>N+H]<sup>+</sup>, 258.2216; found, 258.2222.

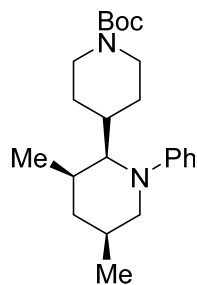

**(±)-1g:** A modification to general procedure C was followed using the imine **3e** (72.6 mg, 0.500 mmol, 1.00 equiv) and *tert*-butyl 4-prop-1-ynylpiperidine-1-carboxylate (112 mg, 0.500 mmol, 1.00 equiv). Rh stock solution (266  $\mu$ L, 25.0  $\mu$ mol, 5 mol %) was added at *t* = 0 h. After 24 h, <sup>1</sup>H NMR analysis indicated complete conversion to the 1,2-dihydropyridine. Pd/C (36.8 mg, 20 wt % of theoretical yield) was then added to the crude mixture and hydrogenation was conducted per general procedure C. Purification by silica gel chromatography (eluent 1:10:89 NEt<sub>3</sub>/EtOAc/hexanes) provided the product **1g** (149 mg, 80%, >95:5 *dr*) as a pale yellow solid (mp: 94–96 °C). IR (neat): 2949, 2867, 1695, 1595, 1503, 1365, 1253, 1166, 993, 741, 687 cm<sup>-1</sup>. <sup>1</sup>H NMR (500 MHz, Chloroform-*d*)  $\delta$  7.20 – 7.17 (m, 2H), 6.78 – 6.77 (m, 2H), 6.65 – 6.62 (m, 1H), 4.15 – 4.07 (m, 2H), 3.57 – 3.51 (m, 2H), 2.72 – 2.68 (m, 2H), 2.50 (apparent t, *J* = 12.8 Hz, 1H), 1.99 – 1.93 (m, 3H), 1.80 – 1.73 (m, 1H), 1.66 – 1.59 (m, 2H), 1.44 (s, 9H), 1.39 – 1.32

(m, 1H), 1.24 – 1.16 (m, 2H), 1.00 (d, *J* = 7.3 Hz, 3H), 0.92 (d, *J* = 6.5 Hz, 3H). <sup>13</sup>C NMR (126 MHz, Chloroform-*d*)  $\delta$  154.7, 150.8, 129.2, 116.2, 114.0, 79.2, 63.2, 49.8, 43.7 (2 broad peaks), 38.0, 34.7, 33.0, 29.73, 29.69, 28.4, 20.9, 19.1. HRMS-ESI (*m/z*): [M+H]<sup>+</sup> calcd for [C<sub>23</sub>H<sub>36</sub>N<sub>2</sub>O<sub>2</sub>+H]<sup>+</sup>, 373.2850; found, 373.2855.

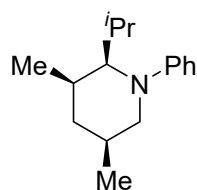

**(±)-1h:** General procedure C was followed using the imine **3e** (72.6 mg, 0.500 mmol, 1.00 equiv) and 4-methylpent-2-yne (87  $\mu$ L, 0.75 mmol, 1.5 equiv). Rh stock solution (266  $\mu$ L, 25.0  $\mu$ mol, 5 mol %) was added at *t* = 0 h. After 24 h, <sup>1</sup>H NMR analysis indicated complete conversion to the 1,2-dihydropyridine. Pd/C (22.8 mg, 20 wt % of theoretical yield) was then added to the crude mixture and hydrogenation was conducted per general procedure C. Purification by silica gel chromatography (eluent 1:99 NEt<sub>3</sub>:hexanes) provided the product **1h** (78.1 mg, 68%, >95:5 *dr*) as a pale yellow oil. IR (neat): 2953, 2870, 1594, 1498, 1381, 1247, 1143, 993, 744, 689 cm<sup>-1</sup>. <sup>1</sup>H NMR (600 MHz, Chloroform-*d*)  $\delta$  7.19 – 7.17 (m, 2H), 6.80 – 6.79 (m, 2H), 6.62 – 6.60 (m, 1H), 3.52 – 3.49 (m, 1H), 3.45 (dd, *J* = 9.0, 4.6 Hz, 1H), 2.56 (dd, *J* = 14.0, 11.7 Hz, 1H), 2.20 – 2.14 (m, 1H), 1.99 – 1.93 (m, 1H), 1.79 – 1.73 (m, 1H), 1.57 – 1.54 (m, 1H), 1.19 (apparent q, *J* = 12.5 Hz, 1H), 1.09 (d, *J* = 6.5 Hz, 3H), 0.99 (d, *J* = 7.3 Hz, 3H), 0.90 (d, *J* = 6.6 Hz, 3H), 0.88 (d, *J* = 6.8 Hz, 3H). <sup>13</sup>C NMR (151 MHz, Chloroform-*d*)  $\delta$  151.0, 129.1, 115.7, 113.8, 65.0, 49.4, 38.0, 34.7, 29.7, 26.1, 23.5, 21.5, 21.0, 19.2. HRMS-ESI (*m/z*): [M+H]<sup>+</sup> calcd for [C<sub>16</sub>H<sub>25</sub>N+H]<sup>+</sup>, 232.2060; found, 232.2065.

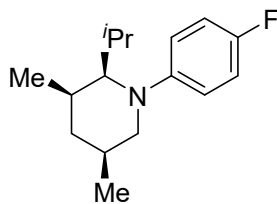

**(±)-1i:** General procedure C was followed using the imine **3i** (163 mg, 1.00 mmol, 1.00 equiv) and 4-methylpent-2-yne (173  $\mu$ L, 1.5 mmol, 1.5 equiv). Rh stock solution (532  $\mu$ L, 50.0  $\mu$ mol, 5 mol %) was added at  $t = 0$  h. After 24 h,  $^1\text{H}$  NMR analysis indicated complete conversion to the 1,2-dihydropyridine. Pd/C (49.0 mg, 20 wt % of theoretical yield) was then added to the crude mixture and hydrogenation was conducted per general procedure C. Purification by preparatory TLC (eluent 1:99  $\text{NEt}_3$ :hexanes) provided the product **1i** (156 mg, 62%, >95:5 *dr*) as a pale yellow oil. IR (neat): 2954, 2871, 1505, 1458, 1226, 1142, 947, 808, 744  $\text{cm}^{-1}$ .  $^1\text{H}$  NMR (600 MHz, Chloroform-*d*)  $\delta$  6.90 – 6.88 (m, 2H), 6.73 – 6.71 (m, 2H), 3.41 – 3.40 (m, 1H), 3.36 (dd,  $J = 8.8, 4.6$  Hz, 1H), 2.59 (dd,  $J = 13.9, 11.7$  Hz, 1H), 2.20 – 2.14 (m, 1H), 1.99 – 1.95 (m, 1H), 1.80 – 1.74 (m, 1H), 1.58 – 1.55 (m, 1H), 1.19 (apparent q,  $J = 12.5$  Hz, 1H), 1.09 (d,  $J = 6.6$  Hz, 3H), 1.00 (d,  $J = 7.3$  Hz, 3H), 0.90 (apparent t,  $J = 7.4$  Hz, 6H).  $^{13}\text{C}$  NMR (151 MHz, Chloroform-*d*)  $\delta$  154.6 (d,  $J = 234.8$  Hz), 147.9, 115.3 (d,  $J = 21.9$  Hz), 115.0 (d,  $J = 7.2$  Hz), 65.9, 50.0, 37.9, 34.5, 29.6, 26.3, 23.6, 21.6, 20.9, 19.1.  $^{19}\text{F}$  NMR (376 MHz, Chloroform-*d*)  $\delta$  -129.8 – -129.9 (m). HRMS-ESI ( $m/z$ ):  $[\text{M}+\text{H}]^+$  calcd for  $[\text{C}_{16}\text{H}_{24}\text{FN}+\text{H}]^+$ , 250.1966; found, 250.1962.

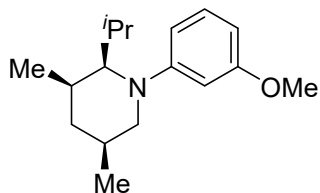

**(±)-1j:** General procedure C was followed using the imine **3j** (175 mg, 1.00 mmol, 1.00 equiv) and 4-methylpent-2-yne (173  $\mu$ L, 1.5 mmol, 1.5 equiv). Rh stock solution (532  $\mu$ L, 50.0  $\mu$ mol, 5 mol %) was added at  $t = 0$ , 24 h. After 48 h,  $^1\text{H}$  NMR analysis indicated complete conversion to the 1,2-dihydropyridine. Pd/C (51.4 mg, 20 wt % of theoretical yield) was then added to the crude mixture and hydrogenation was conducted per general procedure C. Purification by preparatory TLC (eluent 1:5:94  $\text{NEt}_3$ /EtOAc/hexanes) provided the product **1j** (138 mg, 53%, >95:5 *dr*) as a pale yellow oil. IR (neat): 2953, 2871, 1607, 1494, 1455, 1215, 1136, 1055, 829, 747, 685  $\text{cm}^{-1}$ .  $^1\text{H}$  NMR (600 MHz, Chloroform-*d*)  $\delta$  7.11 – 7.08 (m, 1H), 6.44 – 6.42 (m, 1H), 6.34 – 6.33 (m, 1H), 6.20 – 6.19 (m, 1H), 3.78 (s, 3H), 3.50 – 3.47 (m, 1H), 3.43 (dd,  $J = 9.0, 4.6$  Hz, 1H), 2.54 (dd,  $J = 14.0, 11.7$  Hz, 1H), 2.19 – 2.13 (m, 1H), 1.98 – 1.92 (m, 1H), 1.78 – 1.71 (m, 1H), 1.56 – 1.54 (m, 1H), 1.18 (apparent q,  $J = 12.5$  Hz, 1H), 1.08 (d,  $J = 6.5$  Hz, 3H), 0.99 (d,  $J = 7.3$  Hz, 3H), 0.89 (d,  $J = 6.6$  Hz, 3H), 0.87 (d,  $J = 7.0$  Hz, 3H).  $^{13}\text{C}$  NMR (151 MHz, Chloroform-*d*)  $\delta$  160.8, 152.3, 129.8, 107.1, 100.5, 100.0, 65.0, 55.1, 49.5, 38.0, 34.8, 29.8, 26.0, 23.5, 21.4, 21.0, 19.1. HRMS-ESI ( $m/z$ ):  $[\text{M}+\text{H}]^+$  calcd for  $[\text{C}_{17}\text{H}_{27}\text{NO}+\text{H}]^+$ , 262.2165; found, 262.2171.

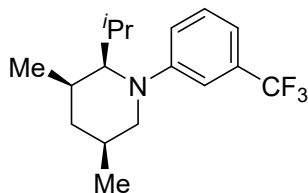

**(±)-1k:** General procedure C was followed using the imine **3k** (213 mg, 1.00 mmol, 1.00 equiv) and 4-methylpent-2-yne (173  $\mu$ L, 1.5 mmol, 1.5 equiv). Rh stock solution (532  $\mu$ L, 50.0  $\mu$ mol, 5 mol %) was added at  $t = 0$ . After 24 h,  $^1\text{H}$  NMR analysis indicated complete conversion to the 1,2-dihydropyridine. Pd/C (59.0 mg, 20 wt % of theoretical yield) was then added to the crude mixture and hydrogenation was conducted per general procedure C. Purification by preparatory TLC (eluent 1:99  $\text{NEt}_3$ /hexanes) provided the product **1k** (214 mg, 72%, >95:5 *dr*) as a pale yellow oil. IR (neat): 2957, 2873, 1606, 1496, 1452, 1318, 1160, 1117, 1075, 996, 776, 694  $\text{cm}^{-1}$ .  $^1\text{H}$  NMR (600 MHz, Chloroform-*d*)  $\delta$  7.26 – 7.23 (m, 1H), 6.95 – 6.91 (m, 2H), 6.84 – 6.82 (m, 1H), 3.52 – 3.50 (m, 1H), 3.47 (dd,  $J = 9.0, 4.7$  Hz, 1H), 2.61 – 2.57 (m, 1H), 2.21 – 2.16 (m, 1H), 1.97 – 1.93 (m, 1H), 1.76 – 1.70 (m, 1H), 1.59 – 1.57 (m, 1H), 1.20 (apparent q,  $J = 12.5$  Hz, 1H), 1.10 (d,  $J = 6.4$  Hz, 3H), 1.02 (d,  $J = 7.3$  Hz, 3H), 0.92 (d,  $J = 6.5$  Hz, 3H), 0.85 (d,  $J = 6.8$  Hz, 3H).  $^{13}\text{C}$  NMR (151 MHz, Chloroform-*d*)  $\delta$  151.0, 131.4 (q,  $J = 31.2$  Hz), 129.5, 124.6 (q,  $J = 272.4$  Hz), 116.6, 112.1 (q,  $J = 4.0$  Hz), 109.9 (q,  $J = 4.0$  Hz), 64.9, 49.5, 37.8, 35.0, 29.9, 26.2, 23.5, 21.4, 20.8, 19.1.  $^{19}\text{F}$  NMR (471 MHz, Chloroform-*d*)  $\delta$  -62.8. HRMS-ESI ( $m/z$ ):  $[\text{M}+\text{H}]^+$  calcd for  $[\text{C}_{17}\text{H}_{24}\text{F}_3\text{N}+\text{H}]^+$ , 300.1934; found, 300.1932.

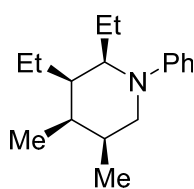

**(±)-1l:** General procedure C was followed using (1*E*,2*E*)-2-methyl-N-phenylbut-2-en-1-imine (79.6 mg, 0.500 mmol, 1.00 equiv) and 3-hexyne (86  $\mu$ L, 0.75 mmol, 1.5 equiv). Rh stock solution (266  $\mu$ L, 25.0  $\mu$ mol, 5 mol %) was added at  $t = 0$ , 24, and 48 h. After 72 h,  $^1\text{H}$  NMR analysis indicated complete conversion to the 1,2-dihydropyridine. Pd/C (24.2 mg, 20 wt % of theoretical yield) was then added to the crude mixture and hydrogenation was conducted per general procedure C. Purification by silica gel chromatography (eluent 1:99  $\text{NEt}_3$ :hexanes) provided the product **1l** (71.9 mg, 59%, >95:5 *dr*) as a pale yellow oil. IR (neat): 2959, 2872, 1597, 1497, 1387, 1221, 1144, 929, 746, 690  $\text{cm}^{-1}$ .  $^1\text{H}$  NMR (600 MHz, Chloroform-*d*)  $\delta$  7.21 – 7.18 (m, 2H), 6.87 – 6.85 (m, 2H), 6.67 – 6.65 (m, 1H), 3.66 – 3.64 (m, 1H), 3.20 (d,  $J = 14.3$  Hz, 1H), 2.93 (apparent t,  $J = 13.0$  Hz, 1H), 1.99 – 1.92 (m, 1H), 1.88 – 1.83 (m, 1H), 1.75 – 1.71 (m, 1H), 1.64 – 1.51 (m, 2H), 1.40 – 1.35 (m, 2H), 0.91 – 0.88 (m, 9H), 0.84 (d,  $J = 7.5$  Hz, 3H).  $^{13}\text{C}$  NMR (151 MHz, Chloroform-*d*)  $\delta$  151.4, 129.1, 116.4, 114.8, 62.1, 44.4, 43.2, 34.8, 32.7, 23.7, 21.3, 16.5, 13.5, 11.7, 8.8. HRMS-ESI ( $m/z$ ):  $[\text{M}+\text{H}]^+$  calcd for  $[\text{C}_{17}\text{H}_{27}\text{N}+\text{H}]^+$ , 246.2216; found, 246.2222.

### Preparation of piperidine 5:

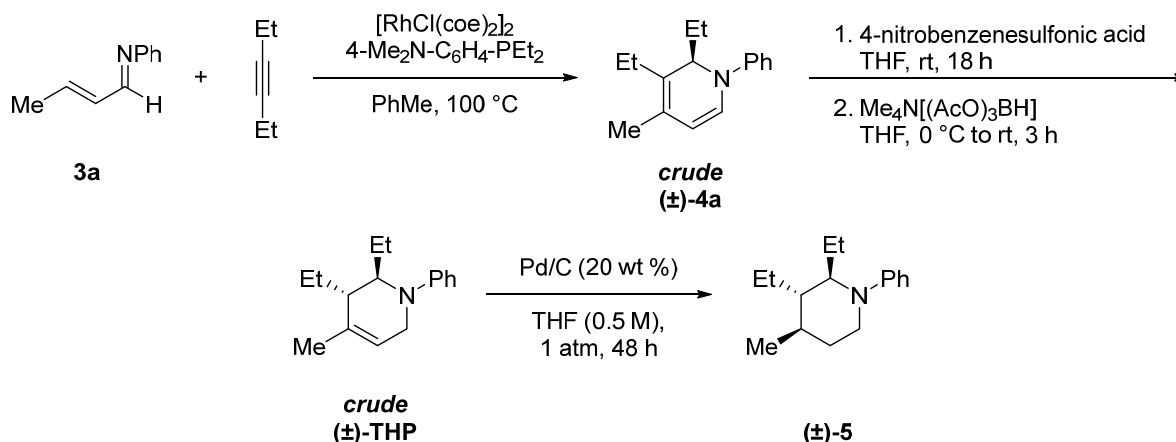

The following protocol is a modification of a previous literature procedure.<sup>7</sup> In an N<sub>2</sub>-filled glove box, a 4-mL vial was charged with imine **3a** (1.69 g, 11.6 mmol, 1.00 equiv). Rh stock solution (see General Methods) (6.2 mL, 0.58 mmol, 5 mol %) was added to the vial, and the contents were transferred to a Schlenk flask. The vial was rinsed with toluene (0.5 mL x 2), and the washings were likewise transferred to the Schlenk flask. 3-hexyne (1.59 mL, 14.0 mmol, 1.2 equiv) was added to the Schlenk flask, followed by toluene (20 mL). The contents were thoroughly mixed and *ca.* 0.6 mL was removed by pipet and transferred to a J. Young NMR tube equipped with a C<sub>6</sub>D<sub>6</sub> capillary (for locking and shimming). The Schlenk flask and the J. Young tube were capped and then taken to a fume hood where they were heated to 100 °C for 24 h, at which point analysis by <sup>1</sup>H NMR of the J. Young tube indicated complete conversion to the 1,2-dihydropyridine. In a fume hood, the crude DHP **4a** solution was then added to a 250-mL round-bottom flask containing 4-nitrobenzenesulfonic acid hydrate (1.3 g, 58 mmol, 5.0 equiv), THF (60 mL), and a magnetic stir bar. The flask was placed under N<sub>2</sub>, and the mixture was stirred at rt for 18 h. A separate 500-mL round-bottom flask containing a magnetic stir was charged with Me<sub>4</sub>N[(AcO)<sub>3</sub>BH] (1.4 g, 52 mmol, 4.5 equiv) and THF was added (130 mL). The suspension was cooled to 0 °C and the resulting iminium solution was transferred via cannula. The mixture was stirred at 0 °C for 2 h and then allowed to warm to room temperature over 1 h. 1 M NaOH was then added until the pH reached *ca.* 11. The reaction mixture was added to a separatory funnel and the layers were separated. The aqueous layer was further extracted with EtOAc (2 x 100 mL). The combined organic layers were washed with brine, dried over MgSO<sub>4</sub>, filtered, and concentrated *in vacuo*. The crude product was plugged through silica (eluent: 1:10:89 NEt<sub>3</sub>:EtOAc:hexanes) and concentrated *in vacuo* to give the crude THP product. The entire crude THP was then taken onto the hydrogenation reaction by transferring the crude product with THF (23 mL, sparged for 15 min prior to use) to a 50-mL round-bottom flask containing a magnetic stir bar. Pd/C (532 mg, 20 wt %, based on theoretical yield of THP) was then added to the solution, and the flask was capped with a rubber septum and purged with N<sub>2</sub> for 5 min. The flask was then purged with an H<sub>2</sub> balloon three times, and then electrical tape and Parafilm were used to seal the flask. The reaction mixture was then stirred at 1000 rpm for 48 h under an H<sub>2</sub> atmosphere (1 atm). The H<sub>2</sub> balloon was removed and the heterogeneous mixture was filtered over Celite (eluent: diethyl ether) and concentrated *in vacuo*. The crude product was then purified by C18 reverse phase chromatography (0-100% CH<sub>3</sub>CN:H<sub>2</sub>O containing 0.1 % TFA) followed by preparatory TLC (1:5:94 NEt<sub>3</sub>:EtOAc:hexanes) to give piperidine **5** (369 mg, 14%) as a pale yellow oil. Yield indicates overall yield from the starting imine **3a** and is not optimized with only pure fractions collected. IR (neat): 2958, 2872, 1596, 1501, 1379, 1217, 1035, 744, 688 cm<sup>-1</sup>. <sup>1</sup>H NMR (600 MHz, Chloroform-*d*) δ 7.23 – 7.21 (m, 2H), 6.83 – 6.81 (m, 2H), 6.73 – 6.70 (m, 1H), 3.45 – 3.42 (m, 1H), 3.22 – 3.19 (m, 2H), 1.89 – 1.84 (m, 1H), 1.68 – 1.61 (m, 1H), 1.57 – 1.49 (m, 2H), 1.47 – 1.41 (m, 3H), 1.24 – 1.20 (m, 1H), 1.04 (d, J = 6.7 Hz, 3H), 0.92 (t, J = 7.4 Hz, 3H), 0.87 (t, J = 7.4 Hz, 3H). <sup>13</sup>C NMR (151 MHz, Chloroform-*d*) δ 151.3, 129.0, 116.9, 114.4, 59.2, 46.2, 44.0, 31.3, 30.2, 26.7, 26.4, 21.3, 11.3, 11.2. HRMS-ESI (*m/z*): [M+H]<sup>+</sup> calcd for [C<sub>16</sub>H<sub>25</sub>N+H]<sup>+</sup>, 232.2060; found, 232.2065.

## Piperidines prepared by alternative methods:

2-methyl-1-phenylpiperidine **1j** was prepared according to a previous literature procedure.<sup>8</sup>

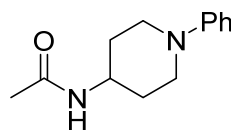

**(±)-6a:** An oven-dried 25-mL round-bottom flask was charged with a magnetic stir bar and 1-phenylpiperidin-4-amine (150 mg, 0.851 mmol, 1.00 equiv) and placed under N<sub>2</sub>. Dry CH<sub>2</sub>Cl<sub>2</sub> (4.3 mL, 0.2 M), acetic anhydride (97  $\mu$ L, 1.0 mmol, 1.2 equiv) and triethylamine (356  $\mu$ L, 2.55 mmol, 3.00 equiv) were added, and the reaction mixture was stirred at rt. After stirring for 18 h, the reaction mixture was concentrated *in vacuo*. The crude product was then purified by silica gel column chromatography (eluent 1:20:79 NEt<sub>3</sub>/EtOAc/hexanes) to provide product **6a** (117 mg, 63%) as a white solid (mp: 137-139 °C). IR (neat): 2934, 1635, 1598, 1494, 1312, 1219, 1131, 918, 756, 689 cm<sup>-1</sup>. <sup>1</sup>H NMR (600 MHz, Chloroform-*d*)  $\delta$  7.25 – 7.22 (m, 2H), 6.92 – 6.91 (m, 2H), 6.84 – 6.82 (m, 1H), 5.56 (s, 1H), 3.95 – 3.89 (m, 1H), 3.62 – 3.60 (m, 2H), 2.84 (t, *J* = 12.0 Hz, 2H), 2.03 – 2.00 (m, 2H), 1.96 (s, 3H), 1.54 (qd, *J* = 11.8, 3.9 Hz, 2H). <sup>13</sup>C NMR (151 MHz, Chloroform-*d*)  $\delta$  169.4, 151.1, 129.1, 119.7, 116.6, 48.7, 46.6, 31.9, 23.5. HRMS-ESI (*m/z*): [M+H]<sup>+</sup> calcd for [C<sub>13</sub>H<sub>18</sub>N<sub>2</sub>O+H]<sup>+</sup>, 219.1492; found, 219.1491.

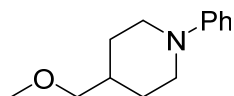

**(±)-6b:** The following protocol is based on a literature procedure.<sup>7</sup> An oven-dried Schlenk flask was charged with a magnetic stir bar, RuPhos Pd G3 (37.2 mg, 0.04 mmol, 0.01 equiv), RuPhos (20.7 mg, 0.04 mmol, 0.01 equiv), 4-(methoxymethyl)piperidine-HCl salt (880 mg, 5.33 mmol, 1.20 equiv), and NaOt-Bu (1.03 g, 10.7 mmol, 2.40 equiv). Under a counterflow of N<sub>2</sub>, dry THF (9 mL, 0.5 M) and chlorobenzene (510  $\mu$ L, 4.44 mmol, 1.00 equiv) were added. The Schlenk flask was placed in a preheated oil bath at 85 °C, and the reaction mixture was stirred vigorously for 24 h. The reaction mixture was then cooled to room temperature, diluted with EtOAc, and added to a separatory funnel containing 20 mL of water. The layers were separated and the aqueous layer was extracted with EtOAc (3 x 20 mL). The combined organic layers were washed with brine, dried over MgSO<sub>4</sub>, filtered and concentrated *in vacuo*. The crude product was then purified by silica gel column chromatography (eluent 1:5:94 NEt<sub>3</sub>/EtOAc/hexanes) to provide the product **6b** (645 mg, 71%) as a pale yellow oil. IR (neat): 2918, 2806, 1599, 1495, 1385, 1244, 1103, 909, 754, 690 cm<sup>-1</sup>. <sup>1</sup>H NMR (600 MHz, Chloroform-*d*)  $\delta$  7.26 – 7.23 (m, 2H), 6.95 – 6.94 (m, 2H), 6.84 – 6.81 (m, 1H), 3.70 – 3.68 (m, 2H), 3.36 (s, 3H), 3.27 (d, *J* = 6.6 Hz, 2H), 2.70 (t, *J* = 12.3 Hz, 2H), 1.85 – 1.83 (m, 2H), 1.78 – 1.71 (m, 1H), 1.40 (qd, *J* = 12.2, 4.1 Hz, 2H). <sup>13</sup>C NMR (151 MHz, Chloroform-*d*)  $\delta$  151.8, 129.0, 119.3, 116.5, 77.8, 58.9, 49.6, 36.1, 29.1. HRMS-ESI (*m/z*): [M+H]<sup>+</sup> calcd for [C<sub>13</sub>H<sub>19</sub>NO+H]<sup>+</sup>, 206.1539; found, 206.1543.

## Preparation of Products

### General procedure E for the amine $\alpha$ -arylation:

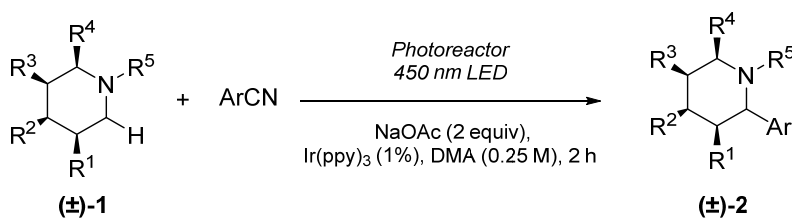

The following protocol is adapted from a literature procedure.<sup>10</sup> A flame-dried Schlenk flask equipped with a magnetic stir bar was charged with the indicated cyanoarene (0.400 mmol, 2.00 equiv) and NaOAc (32.8 mg, 0.400 mmol, 2.00 equiv), and the side arm of the Schlenk flask was connected to a double manifold Schlenk line and placed under N<sub>2</sub>. Dry DMA (0.25 M total) was then used to transfer the *N*-phenyl piperidine **1** (0.200 mmol, 1.00 equiv) to the Schlenk flask (240  $\mu$ L x 3). Ir(ppy)<sub>3</sub> (80  $\mu$ L, 0.0020 mmol, 0.010 equiv) was then added as a stock solution in DMA (0.025 M). The Schlenk flask was then degassed using three freeze/pump/thaw cycles under nitrogen in the dark. The Schlenk flask was placed in the Penn Photoreactor, and the mixture was stirred at 1000 rpm while being irradiated at 450 nm (50% LED). After 2 h, the reaction mixture was diluted with EtOAc and added to a separatory funnel containing 10 mL of a saturated aqueous solution of Na<sub>2</sub>CO<sub>3</sub>. The layers were separated and the aqueous layer was extracted with EtOAc (3 x 5 mL). The combined organic layers were washed with brine, dried over MgSO<sub>4</sub>, filtered, and concentrated *in vacuo*. The crude product was then purified by silica gel column chromatography, preparative thin layer chromatography (TLC), or C18 reverse phase chromatography to give the indicated product **2**.

**Safety warning:** NaCN is a byproduct of the reaction and is highly toxic and when treated with acid can form the toxic gas HCN. Aqueous cyanide-containing waste should be kept basic and disposed of separately in accord with institutional guidelines.

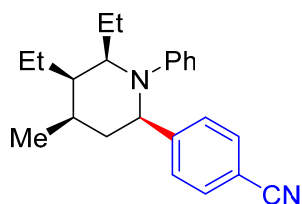

**(±)-2a-syn:** General procedure E was followed using the piperidine **1a** (46.3 mg, 0.200 mmol, 1.00 equiv) and 1,4-dicyanobenzene (51.3 mg, 0.400 mmol, 2.00 equiv). Crude  $^1\text{H}$  NMR analysis of the reaction mixture determined the ratio of diastereomers to be >95:5. Purification by silica gel chromatography (eluent 1:3:96  $\text{NEt}_3/\text{EtOAc}/\text{hexanes}$ ) provided the product **2a-syn** (major diastereomer) (57.1 mg, 86%, >95:5 *dr*) as a pale yellow waxy solid. IR (neat): 2957, 2879, 2225, 1596, 1491, 1245, 1116, 1020, 828, 774, 696  $\text{cm}^{-1}$ .  $^1\text{H}$  NMR (600 MHz, Chloroform-*d*)  $\delta$  7.36 (d,  $J$  = 8.6 Hz, 2H), 7.27 – 7.26 (m, 2H), 7.08 – 7.05 (m, 2H), 6.95 – 6.94 (m, 2H), 6.92 – 6.89 (m, 1H), 4.04 (dd,  $J$  = 10.3, 4.6 Hz, 1H), 2.80 – 2.78 (m, 1H), 1.98 – 1.93 (m, 1H), 1.80 – 1.73 (m, 1H), 1.66 – 1.63 (m, 1H), 1.60 – 1.53 (m, 2H), 1.48 – 1.41 (m, 1H), 1.35 – 1.27 (m, 1H), 1.07 – 0.99 (m, 1H), 1.04 (t,  $J$  = 7.7 Hz, 3H), 1.03 (d,  $J$  = 6.9 Hz, 3H), 0.76 (t,  $J$  = 7.4 Hz, 3H).  $^{13}\text{C}$  NMR (151 MHz, Chloroform-*d*)  $\delta$  150.9, 150.0, 131.7, 128.5, 128.3, 127.2, 124.5, 119.1, 109.8, 69.9, 68.1, 42.6, 40.1, 35.6, 24.4, 19.3, 16.8, 16.4, 11.4. HRMS-ESI ( $m/z$ ):  $[\text{M}+\text{H}]^+$  calcd for  $[\text{C}_{23}\text{H}_{28}\text{N}_2+\text{H}]^+$ , 333.2325; found, 333.2331.

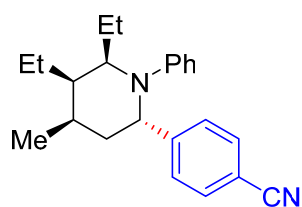

**(±)-2a-anti:** A modification to general procedure E was followed using the piperidine **1a** (116 mg, 0.500 mmol, 1.00 equiv), 1,4-dicyanobenzene (128 mg, 1.00 mmol, 2.00 equiv) and a 16 min reaction time.  $^1\text{H}$  crude NMR analysis provided a 50:50 mixture of diastereomers. Purification of the mixture by preparative TLC (1:3:96  $\text{NEt}_3/\text{EtOAc}/\text{hexanes}$ ) provided the “minor” diastereomer **2a-anti** (66.0 mg, 40%, >95:5 *dr*) as a pale yellow solid (mp: 90–92 °C). IR (neat) 2951, 2870, 2226, 1595, 1496, 1261, 1097, 1020, 828, 760, 697  $\text{cm}^{-1}$ .  $^1\text{H}$  NMR (600 MHz, Chloroform-*d*)  $\delta$  7.48 (d,  $J$  = 8.3 Hz, 2H), 7.37 (d,  $J$  = 8.2 Hz, 2H), 7.08 – 7.06 (m, 2H), 6.73 – 6.66 (m, 1H), 6.69 – 6.64 (m, 2H), 4.61 (dd,  $J$  = 8.5, 3.2 Hz, 1H), 3.68 – 3.66 (m, 1H), 2.09 – 2.02 (m, 2H), 1.93 – 1.88 (m, 2H), 1.67 – 1.59 (m, 2H), 1.52 – 1.42 (m, 2H), 1.05 (d,  $J$  = 7.0 Hz, 3H), 0.96 (t,  $J$  = 7.4 Hz, 3H), 0.68 (t,  $J$  = 7.5 Hz, 3H).  $^{13}\text{C}$  NMR (151 MHz, Chloroform-*d*)  $\delta$  150.6, 149.4, 132.1, 128.5, 127.8, 120.0, 119.4, 119.1, 109.8, 64.7, 54.6, 44.0, 41.5, 27.9, 23.3, 22.7, 16.1, 15.0, 12.4. HRMS-ESI ( $m/z$ ):  $[\text{M}+\text{H}]^+$  calcd for  $[\text{C}_{23}\text{H}_{28}\text{N}_2+\text{H}]^+$ , 333.2325; found, 333.2331.

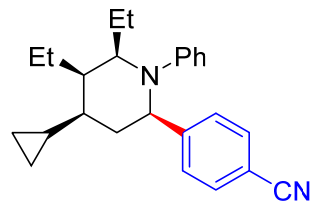

**(±)-2b:** General procedure E was followed using the piperidine **1b** (51.5 mg, 0.200 mmol, 1.00 equiv) and 1,4-dicyanobenzene (51.3 mg, 0.400 mmol, 2.00 equiv). Crude  $^1\text{H}$  NMR analysis of the reaction mixture determined that the reaction gave the desired product **2b** as a mixture of diastereomers (87:13 *dr*). Purification by preparative TLC (1:3:96  $\text{NEt}_3/\text{EtOAc}/\text{hexanes}$ ) provided the major diastereomer **2b** (42.9 mg, 60%, >95:5 *dr*) as a pale yellow solid (mp: 99–101 °C). IR (neat): 2963, 2887, 2225, 1596, 1490, 1216, 1109, 1016, 834, 777, 704  $\text{cm}^{-1}$ .  $^1\text{H}$  NMR (600 MHz, Chloroform-*d*)  $\delta$  7.36 (d,  $J$  = 8.0 Hz, 2H), 7.27 – 7.26 (m, 2H), 7.07 – 7.04 (m, 2H), 6.94 – 6.90 (m, 3H), 3.95 (dd,  $J$  = 8.6, 6.3 Hz, 1H), 2.67 – 2.65 (m, 1H), 1.85 – 1.80 (m, 2H), 1.75 – 1.72 (m, 2H), 1.63 – 1.55 (m, 1H), 1.34 – 1.26 (m, 1H), 1.11 (t,  $J$  = 7.5 Hz, 3H), 1.02 – 0.96 (m, 1H), 0.90 – 0.85 (m, 1H), 0.77 – 0.72 (m, 1H), 0.73 (t,  $J$  = 7.5 Hz, 3H), 0.47 – 0.46 (m, 2H), 0.23 – 0.20 (m, 1H), 0.09 – 0.07 (m, 1H).  $^{13}\text{C}$  NMR (151 MHz, Chloroform-*d*)  $\delta$  150.8, 150.1, 131.7, 128.6, 128.3, 127.6, 124.8, 119.1, 109.8, 69.8, 68.5, 47.3, 41.6, 38.2, 24.4, 17.4, 16.2, 14.6, 11.3, 4.5, 3.6. HRMS-ESI ( $m/z$ ):  $[\text{M}+\text{H}]^+$  calcd for  $[\text{C}_{25}\text{H}_{30}\text{N}_2+\text{H}]^+$ , 359.2482; found, 359.2487.

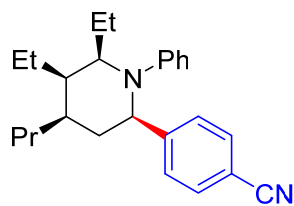

**(±)-2c:** General procedure E was followed using the piperidine **1c** (51.9 mg, 0.200 mmol, 1.00 equiv) and 1,4-dicyanobenzene (51.3 mg, 0.400 mmol, 2.00 equiv). Crude  $^1\text{H}$  NMR analysis of the reaction mixture determined the ratio of diastereomers to be >95:5. Purification by preparative TLC (1:5:94  $\text{NEt}_3/\text{EtOAc}/\text{hexanes}$ ) provided the product **2c** (66.4 mg, 92%, >95:5 *dr*) as a pale yellow oil. IR (neat): 2958, 2873, 2226, 1597, 1492, 1224, 1117, 1025, 831, 777, 699  $\text{cm}^{-1}$ .  $^1\text{H}$  NMR (600 MHz, Chloroform-*d*)  $\delta$  7.36 (d,  $J$  = 8.4 Hz, 2H), 7.26 – 7.25 (m, 2H), 7.08 – 7.05 (m, 2H), 6.96 – 6.91 (m, 3H), 4.00 (dd,  $J$  = 11.3, 3.5 Hz, 1H), 2.74 – 2.72 (m, 1H), 1.84 – 1.79 (m, 1H), 1.78 – 1.72 (m, 2H), 1.63 – 1.60 (m, 1H), 1.52 – 1.48 (m, 1H), 1.46 – 1.34 (m, 4H), 1.32 – 1.23 (m, 2H), 1.05 – 0.96 (m, 1H), 1.04 (t,  $J$  = 7.7 Hz, 3H), 0.93 (t,  $J$  = 7.1 Hz, 3H), 0.73 (t,  $J$  = 7.5 Hz, 3H).  $^{13}\text{C}$  NMR (151 MHz, Chloroform-*d*)  $\delta$  150.9, 150.1, 131.7, 128.6, 128.3, 127.8, 124.9, 119.1, 109.8, 70.2, 68.7, 41.3, 40.9, 38.3, 35.8, 24.3, 20.4, 16.9, 16.4, 14.4, 11.3. HRMS-ESI ( $m/z$ ):  $[\text{M}+\text{H}]^+$  calcd for  $[\text{C}_{25}\text{H}_{32}\text{N}_2+\text{H}]^+$ , 361.2638; found, 361.2644.

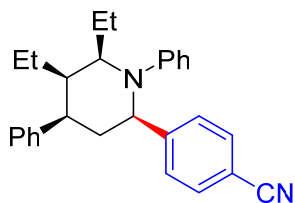

**(±)-2d:** A modification to General procedure E was followed using the piperidine **1d** (58.7 mg, 0.200 mmol, 1.00 equiv), 1,4-dicyanobenzene (51.3 mg, 0.400 mmol, 2.00 equiv), and a 16 h reaction time. Crude <sup>1</sup>H NMR analysis of the reaction mixture determined the ratio of diastereomers to be >95:5. Purification by preparative TLC (1:5:94 NEt<sub>3</sub>/EtOAc/hexanes) provided the product **2d** (56.8 mg, 72%, >95:5 *dr*) as a pale yellow solid (mp: 90-93 °C). IR (neat): 2954, 2874, 2223, 1595, 1496, 1222, 1122, 1018, 840, 757, 699 cm<sup>-1</sup>. <sup>1</sup>H NMR (600 MHz, Chloroform-*d*) δ 7.39 (d, *J* = 8.4 Hz, 2H), 7.32 – 7.31 (m, 4H), 7.26 – 7.25 (m, 2H), 7.22 – 7.20 (m, 1H), 7.10 – 7.08 (m, 2H), 7.02 – 7.01 (m, 2H), 6.97 – 6.94 (m, 1H), 4.15 (dd, *J* = 11.1, 3.2 Hz, 1H), 3.20 – 3.16 (m, 1H), 2.98 – 2.96 (m, 1H), 2.20 – 2.14 (m, 1H), 2.07 – 2.06 (m, 1H), 1.91 – 1.89 (m, 1H), 1.83 – 1.76 (m, 1H), 1.36 – 1.25 (m, 2H), 1.08 – 1.01 (m, 1H), 0.75 (t, *J* = 7.4 Hz, 3H), 0.53 (t, *J* = 7.6 Hz, 3H). <sup>13</sup>C NMR (151 MHz, Chloroform-*d*) δ 150.4, 149.8, 143.8, 131.8, 128.7, 128.4, 128.3, 128.2, 127.2, 126.1, 125.4, 119.0, 110.1, 70.4, 68.8, 46.0, 43.9, 35.6, 24.4, 16.7, 15.8, 11.2. HRMS-ESI (*m/z*): [M+H]<sup>+</sup> calcd for [C<sub>28</sub>H<sub>30</sub>N<sub>2</sub>+H]<sup>+</sup>, 395.2482; found, 395.2487.

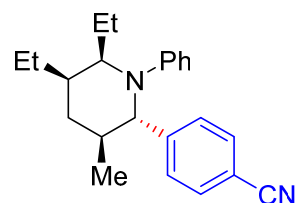

**(±)-2e:** General procedure E was followed using the piperidine **1e** (46.3 mg, 0.200 mmol, 1.00 equiv) and 1,4-dicyanobenzene (51.3 mg, 0.400 mmol, 2.00 equiv). Crude <sup>1</sup>H NMR analysis of the reaction mixture determined the ratio of diastereomers to be >95:5. Purification by silica gel chromatography (eluent 1:3:86 NEt<sub>3</sub>/EtOAc/hexanes) provided the product **2e** (58.9 mg, 89%, >95:5 *dr*) as a pale yellow solid (mp: 72-74 °C). IR (neat): 2953, 2873, 2231, 1597, 1491, 1233, 1122, 1021, 825, 762, 699 cm<sup>-1</sup>. <sup>1</sup>H NMR (600 MHz, Chloroform-*d*) δ 7.40 (d, *J* = 8.4 Hz, 2H), 7.37 (d, *J* = 8.4 Hz, 2H), 7.01 – 6.99 (m, 2H), 6.82 – 6.80 (m, 2H), 6.75 – 6.73 (m, 1H), 3.87 (d, *J* = 9.7 Hz, 1H), 3.54 (apparent q, *J* = 4.4 Hz, 1H), 2.16 – 2.10 (m, 1H), 1.68 (dt, *J* = 13.3, 3.7 Hz, 1H), 1.63 – 1.55 (m, 2H), 1.43 – 1.35 (m, 2H), 1.31 – 1.24 (m, 1H), 1.15 (apparent q, *J* = 12.5 Hz, 1H), 1.00 (t, *J* = 7.4 Hz, 3H), 0.73 (d, *J* = 6.6 Hz, 3H), 0.49 (t, *J* = 7.6 Hz, 3H). <sup>13</sup>C NMR (151 MHz, Chloroform-*d*) δ 150.9, 149.8, 131.5, 129.4, 127.9, 125.3, 121.6, 119.0, 109.9, 68.4, 64.8, 43.5, 40.4, 34.1, 26.1, 19.1, 16.7, 15.0, 12.0. HRMS-ESI (*m/z*): [M+H]<sup>+</sup> calcd for [C<sub>23</sub>H<sub>28</sub>N<sub>2</sub>+H]<sup>+</sup>, 333.2325; found, 333.2331.

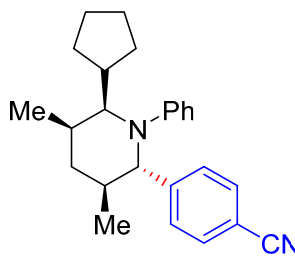

**(±)-2f:** General procedure E was followed using the piperidine **1f** (51.5 mg, 0.200 mmol, 1.00 equiv) and 1,4-dicyanobenzene (51.3 mg, 0.400 mmol, 2.00 equiv). Crude <sup>1</sup>H NMR analysis of the reaction mixture determined the ratio of diastereomers to be >95:5. Purification by preparative TLC (1:5:94 NEt<sub>3</sub>/EtOAc/hexanes) provided the product **2f** (61.0 mg, 85%, >95:5 *dr*) as a pale yellow oil. IR (neat): 2954, 2870, 2226, 1596, 1493, 1244, 1107, 1018, 819, 762, 699 cm<sup>-1</sup>. <sup>1</sup>H NMR (400 MHz, Chloroform-*d*) δ 7.42 (d, *J* = 8.2 Hz, 2H), 7.34 (d, *J* = 8.4 Hz, 2H), 6.93 – 6.89 (m, 2H), 6.67 – 6.61 (m, 3H), 4.12 (d, *J* = 9.8 Hz, 1H), 3.71 (dd, *J* = 8.3, 4.2 Hz, 1H), 2.47 – 2.30 (m, 2H), 1.85 – 1.78 (m, 2H), 1.72 – 1.67 (m, 2H), 1.50 – 1.40 (m, 4H), 1.37 – 1.29 (m, 1H), 1.18 – 1.05 (m, 2H), 1.06 (d, *J* = 7.2 Hz, 3H), 0.81 (d, *J* = 6.4 Hz, 3H). <sup>13</sup>C NMR (126 MHz, Chloroform-*d*) δ 151.2, 149.9, 131.5, 129.4, 127.5, 124.3, 119.7, 119.0, 109.8, 69.9, 65.4, 40.4, 39.5, 37.1, 36.1, 32.9, 32.2, 24.8, 24.5, 20.1, 19.4. HRMS-ESI (*m/z*): [M+H]<sup>+</sup> calcd for [C<sub>25</sub>H<sub>30</sub>N<sub>2</sub>+H]<sup>+</sup>, 359.2482; found, 359.2487.

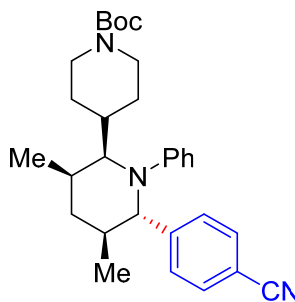

**(±)-2g:** General procedure E was followed using the piperidine **1g** (74.5 mg, 0.200 mmol, 1.00 equiv) and 1,4-dicyanobenzene (51.3 mg, 0.400 mmol, 2.00 equiv). Crude <sup>1</sup>H NMR analysis of the reaction mixture determined the ratio of diastereomers to be >95:5. Purification by preparative TLC (1:20:79 NEt<sub>3</sub>/EtOAc/hexanes) followed by purification by C18 reverse phase chromatography (0-100% CH<sub>3</sub>CN:H<sub>2</sub>O containing 0.1 % TFA) provided the product **2g** (66.0 mg, 70%, >95:5 *dr*) as a pale yellow waxy solid. IR (neat): 2957, 2873, 2226, 1686, 1595, 1494, 1236, 1165, 910, 730, 700 cm<sup>-1</sup>. <sup>1</sup>H NMR (400 MHz, Chloroform-*d*) δ 7.42 (d, *J* = 7.9 Hz, 2H), 7.33 (d, *J* = 8.1 Hz, 2H), 6.97 – 6.93 (m, 2H), 6.74 – 6.72 (m, 2H), 6.67 – 6.63 (m, 1H), 4.20 (d, *J* = 9.5 Hz, 1H), 3.99 (br s, 2H), 3.71 – 3.69 (m, 1H), 2.57 – 2.41 (m, 3H), 2.00 – 1.95 (m, 1H), 1.69 – 1.66 (m, 3H), 1.55 – 1.34 (m, 4H), 1.39 (s, 9H), 1.11 (d, *J* = 7.2 Hz, 3H), 0.82 (d, *J* = 6.3 Hz, 3H). <sup>13</sup>C NMR (151 MHz, acetone-*d*<sub>6</sub>) δ 155.0, 151.9, 132.4, 130.6, 128.8, 125.0, 121.0, 119.5, 110.8, 79.2, 68.7, 67.1, 45.9, 45.0, 41.1, 39.9, 37.5, 37.2, 35.1, 32.5, 28.7, 20.1, 19.6. HRMS-ESI (*m/z*): [M+H]<sup>+</sup> calcd for [C<sub>30</sub>H<sub>39</sub>N<sub>3</sub>O<sub>2</sub>+H]<sup>+</sup>, 474.3115; found, 474.3120.

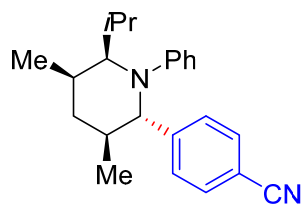

**(±)-2h:** General procedure E was followed using the piperidine **1h** (46.3 mg, 0.200 mmol, 1.00 equiv) and 1,4-dicyanobenzene (51.3 mg, 0.400 mmol, 2.00 equiv). Crude <sup>1</sup>H NMR analysis of the reaction mixture determined the ratio of diastereomers to be >95:5. Purification by preparative TLC (1:5:94 NEt<sub>3</sub>/EtOAc/hexanes) provided the product **2h** (48.1 mg, 72%, >95:5 *dr*) as a pale yellow oil. IR (neat): 2957, 2874, 2226, 1594, 1495, 1244, 1107, 1017, 821, 760, 699 cm<sup>-1</sup>. <sup>1</sup>H NMR (500 MHz, Chloroform-*d*) δ 7.44 (d, *J* = 8.1 Hz, 2H), 7.37 (d, *J* = 8.3 Hz, 2H), 6.98 – 6.95 (m, 2H), 6.76 – 6.75 (m, 2H), 6.66 – 6.63 (m, 1H), 4.27 (d, *J* = 9.7 Hz, 1H), 3.71 (apparent t, *J* = 5.0 Hz, 1H), 2.44 – 2.35 (m, 1H), 2.27 – 2.20 (m, 1H), 1.77 – 1.69 (m, 1H), 1.67 – 1.63 (m, 1H), 1.45 (apparent q, *J* = 12.6 Hz, 1H), 1.12 (d, *J* = 7.2 Hz, 3H), 0.96 (d, *J* = 7.0 Hz, 3H), 0.90 (d, *J* = 6.9 Hz, 3H), 0.85 (d, *J* = 6.5 Hz, 3H). <sup>13</sup>C NMR (126 MHz, Chloroform-*d*) δ 151.1, 150.8, 131.6, 129.1, 127.8, 123.4, 119.8, 119.0, 109.9, 68.3, 66.8, 39.7, 36.9, 36.0, 29.5, 24.5, 22.6, 19.7, 19.5. HRMS-ESI (*m/z*): [M+H]<sup>+</sup> calcd for [C<sub>23</sub>H<sub>28</sub>N<sub>2</sub>+H]<sup>+</sup>, 333.2325; found, 333.2331.

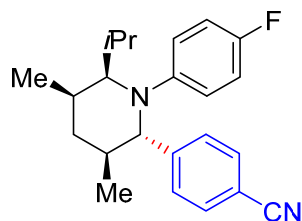

**(±)-2i:** General procedure E was followed using the piperidine **1i** (49.9 mg, 0.200 mmol, 1.00 equiv) and 1,4-dicyanobenzene (51.3 mg, 0.400 mmol, 2.00 equiv). Crude <sup>1</sup>H NMR analysis of the reaction mixture determined the ratio of diastereomers to be >95:5. Purification by preparative TLC (1:5:94 NEt<sub>3</sub>/EtOAc/hexanes) provided the product **2i** (65.3 mg, 93%, >95:5 *dr*) as a pale yellow oil. IR (neat): 2958, 2874, 2227, 1607, 1504, 1216, 1107, 1017, 822, 732 cm<sup>-1</sup>. <sup>1</sup>H NMR (600 MHz, Chloroform-*d*) δ 7.42 (d, *J* = 8.4 Hz, 2H), 7.32 (d, *J* = 8.3 Hz, 1H), 6.72 – 6.69 (m, 2H), 6.68 – 6.64 (m, 2H), 4.23 (d, *J* = 9.7 Hz, 1H), 3.62 (t, *J* = 4.6 Hz, 1H), 2.44 – 2.38 (m, 1H), 2.21 – 2.17 (m, 1H), 1.75 – 1.70 (m, 1H), 1.63 (dt, *J* = 13.4, 4.1 Hz, 1H), 1.47 (apparent q, *J* = 12.7 Hz, 1H), 1.10 (d, *J* = 7.2 Hz, 3H), 0.98 (d, *J* = 7.1 Hz, 3H), 0.88 (d, *J* = 7.0 Hz, 3H), 0.80 (d, *J* = 6.5 Hz, 3H). <sup>13</sup>C NMR (126 MHz, Chloroform-*d*) δ 156.8 (d, *J* = 240.0 Hz), 150.3, 147.2 (d, *J* = 2.4 Hz), 131.6, 129.2, 125.4, 118.9, 114.4 (d, *J* = 22.0 Hz), 110.0, 69.1, 66.5, 39.9, 36.7, 36.2, 29.5, 24.7, 22.8, 19.6, 19.3. <sup>19</sup>F NMR (471 MHz, Chloroform-*d*) δ -123.2 (s). HRMS-ESI (*m/z*): [M+H]<sup>+</sup> calcd for [C<sub>23</sub>H<sub>27</sub>FN<sub>2</sub>+H]<sup>+</sup>, 351.2231; found, 351.2237.

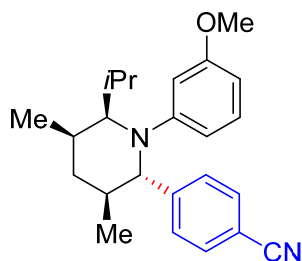

**(±)-2j:** General procedure E was followed using the piperidine **1j** (52.3 mg, 0.200 mmol, 1.00 equiv) and 1,4-dicyanobenzene (51.3 mg, 0.400 mmol, 2.00 equiv). Crude <sup>1</sup>H NMR analysis of the reaction mixture determined the ratio of diastereomers to be >95:5. Purification by preparative TLC (1:10:89 NEt<sub>3</sub>/EtOAc/hexanes) provided the product **2j** (48.2 mg, 67%, >95:5 *dr*) as a pale yellow oil. IR (neat): 2956, 2874, 2226, 1596, 1487, 1213, 1158, 1046, 822, 730, 702 cm<sup>-1</sup>. <sup>1</sup>H NMR (600 MHz, Chloroform-*d*) δ 7.46 (d, *J* = 8.1 Hz, 2H), 7.38 (d, *J* = 8.0 Hz, 2H), 6.89 – 6.86 (m, 1H), 6.39 – 6.38 (m, 1H), 6.30 – 6.29 (m, 1H), 6.23 – 6.21 (m, 1H), 4.23 (d, *J* = 9.6 Hz, 1H), 3.69 – 3.67 (m, 1H), 3.63 (s, 3H), 2.39 – 2.34 (m, 1H), 2.28 – 2.22 (m, 1H), 1.76 – 1.70 (m, 1H), 1.64 (dt, *J* = 13.5, 4.2 Hz, 1H), 1.42 (apparent q, *J* = 12.5 Hz, 1H), 1.12 (d, *J* = 7.2 Hz, 3H), 0.96 (d, *J* = 7.0 Hz, 3H), 0.92 (d, *J* = 6.9 Hz, 3H), 0.85 (d, *J* = 6.5 Hz, 3H). <sup>13</sup>C NMR (151 MHz, Chloroform-*d*) δ 159.4, 152.5, 150.9, 131.7, 128.9, 128.4, 119.1, 115.9, 109.9, 109.5, 104.6, 68.0, 67.1, 55.0, 39.5, 36.9, 35.7, 29.5, 24.4, 22.5, 19.62, 19.57. HRMS-ESI (*m/z*): [M+H]<sup>+</sup> calcd for [C<sub>24</sub>H<sub>30</sub>N<sub>2</sub>O+H]<sup>+</sup>, 363.2431; found, 363.2430.

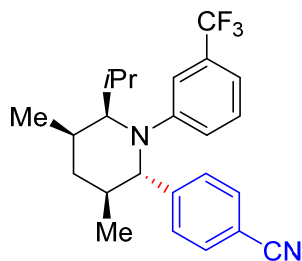

**(±)-2k:** A modification to General procedure E was followed using the piperidine **1k** (59.9 mg, 0.200 mmol, 1.00 equiv), 1,4-dicyanobenzene (51.3 mg, 0.400 mmol, 2.00 equiv), Ir(ppy)<sub>3</sub> (160 μL, 0.004 mmol, 0.020 equiv) as a stock solution in DMA (0.025 M), and a reaction time of 72 h. Crude <sup>1</sup>H NMR analysis of the reaction mixture determined the ratio of diastereomers to be >95:5. Purification by preparative TLC (1:5:94 NEt<sub>3</sub>/EtOAc/hexanes) provided the product **2k** (44.3 mg, 55%, >95:5 *dr*) as a pale yellow waxy solid. IR (neat): 2961, 2875, 2227, 1608, 1324, 1161, 1120, 1019, 822, 733, 103 cm<sup>-1</sup>. <sup>1</sup>H NMR (500 MHz, Chloroform-*d*) δ 7.46 (d, *J* = 8.1 Hz, 2H), 7.36 (d, *J* = 8.1 Hz, 2H), 7.07 – 7.04 (m, 1H), 6.97 – 6.96 (m, 1H), 6.91 – 6.86 (m, 2H), 4.25 (d, *J* = 9.7 Hz, 1H), 3.77 – 3.75 (m, 1H), 2.44 – 2.37 (m, 1H), 2.27 – 2.21 (m, 1H), 1.82 – 1.73 (m, 1H), 1.67 (dt, *J* = 13.5, 4.1 Hz, 1H), 1.44 (apparent q, *J* = 12.6 Hz, 1H), 1.13 (d, *J* = 7.2 Hz, 3H), 0.94 (d, *J* = 7.0 Hz, 3H), 0.90 (d, *J* = 6.9 Hz, 3H), 0.86 (d, *J* = 6.5 Hz, 3H). <sup>13</sup>C NMR (151 MHz, Chloroform-*d*) δ 151.5, 149.9, 131.8, 130.2 (q, *J* = 31.8 Hz), 129.0, 128.3, 125.8, 124.1 (q, *J* = 272.3 Hz), 119.4, 118.8, 116.0, 110.3, 68.3, 66.9, 39.7, 36.6, 35.9, 29.6, 24.7, 22.4, 19.6, 19.5. <sup>19</sup>F NMR (470 MHz, Chloroform-*d*) δ -62.9. HRMS-ESI (*m/z*): [M+H]<sup>+</sup> calcd for [C<sub>24</sub>H<sub>27</sub>F<sub>3</sub>N<sub>2</sub>+H]<sup>+</sup>, 401.2199; found, 401.2193.



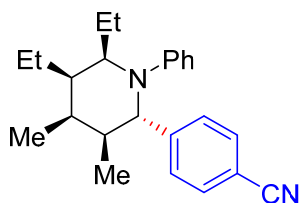

**(±)-2l:** General procedure E was followed using the piperidine **1l** (49.1 mg, 0.200 mmol, 1.00 equiv) and 1,4-dicyanobenzene (51.3 mg, 0.400 mmol, 2.00 equiv). Crude <sup>1</sup>H NMR analysis of the reaction mixture determined that the reaction gave the desired product **2l** as a mixture of diastereomers (84:16 *dr*). Purification by preparative TLC (1:5:94 NEt<sub>3</sub>/EtOAc/hexanes) provided the product **2l** (59.4 mg, 86%, 85:15 *dr*) as a pale yellow solid (mp: 98-100 °C). IR (neat): 2959, 2873, 2221, 1596, 1493, 1228, 1132, 1012, 824, 755, 702 cm<sup>-1</sup>. <sup>1</sup>H NMR (600 MHz, Chloroform-*d*) δ 7.39 (d, *J* = 8.1 Hz, 1.7H), 7.36 (d, *J* = 8.2 Hz, 1.7H), 7.30 (d, *J* = 8.0 Hz, 0.3H), 7.17 (d, *J* = 8.0 Hz, 0.3H), 7.09 – 7.06 (m, 0.3H), 7.01 – 6.98 (m, 2H), 6.94 – 6.92 (m, 0.15H), 6.85 – 6.83 (m, 1.7H), 6.75 – 6.73 (m, 0.85H), 4.36 (d, *J* = 3.6 Hz, 0.15H), 4.08 (d, *J* = 9.9 Hz, 0.85H), 3.52 (q, *J* = 4.5 Hz, 0.85H), 2.61 – 2.58 (m, 0.15H), 2.28 – 2.24 (m, 0.85H), 2.17 – 2.12 (m, 0.15H), 1.92 – 1.81 (m, 1.7H), 1.77 – 1.67 (m, 0.3H), 1.54 – 1.44 (m, 3.55), 1.34 – 1.26 (m, 0.3H), 1.12 (d, *J* = 7.0 Hz, 0.45H), 1.01 (t, *J* = 7.3 Hz, 2.55H), 1.02 – 0.97 (m, 0.45H), 0.95 – 0.85 (m, 0.15H), 0.91 (d, *J* = 7.4 Hz, 2.55H), 0.68 – 0.64 (m, 0.9H), 0.59 (d, *J* = 6.9 Hz, 2.55H), 0.26 (t, *J* = 7.5 Hz, 2.55H). <sup>13</sup>C NMR (151 MHz, Chloroform-*d*) δ 150.8, 150.1, 149.9, 148.4, 131.5, 130.8, 130.0, 129.4, 128.2, 128.0, 125.8, 125.6, 124.9, 121.9, 119.12, 119.08, 109.8, 109.1, 73.8, 73.1, 68.4, 59.9, 47.0, 44.3, 43.5, 41.4, 40.1, 35.6, 24.2, 23.6, 20.6, 18.9, 17.8, 17.3, 17.0, 16.1, 12.0, 11.6, 10.9, 9.6. HRMS-ESI (*m/z*): [M+H]<sup>+</sup> calcd for [C<sub>24</sub>H<sub>30</sub>N<sub>2</sub>+H]<sup>+</sup>, 347.2482; found, 347.2487.

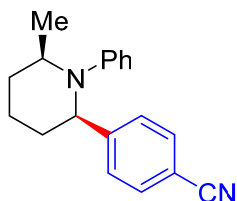

**(±)-2m:** General procedure E was followed using the piperidine **1m** (35.1 mg, 0.200 mmol, 1.00 equiv) and 1,4-dicyanobenzene (51.3 mg, 0.400 mmol, 2.00 equiv). Crude <sup>1</sup>H NMR analysis of the reaction mixture determined that the reaction gave the desired product **2m** as a mixture of diastereomers (64:36 *dr*). Purification by preparative TLC (1:5:94 NEt<sub>3</sub>/EtOAc/hexanes) provided the product **2m** (46.9 mg, 85%, 63:37 *dr*) as a pale yellow oil. Purification by C18 reverse phase chromatography (0-60% CH<sub>3</sub>CN:H<sub>2</sub>O containing 0.1 % TFA) provided fractions of each of the diastereomers separately for characterization (major: 10.6 mg, 19%; minor: 5.0 mg, 9%).

**(±)-2m-syn (major diastereomer):** pale yellow solid (mp: 118-120 °C). IR (neat): 2932, 2224, 1596, 1487, 1228, 1095, 1048, 836, 772, 705 cm<sup>-1</sup>. <sup>1</sup>H NMR (500 MHz, Chloroform-*d*) δ 7.36 (d, *J* = 8.4 Hz, 2H), 7.29 (d, *J* = 8.2 Hz, 2H), 7.09 – 7.06 (m, 2H), 7.00 – 6.99 (m, 2H), 6.95 – 6.92 (m, 1H), 3.98 (dd, *J* = 10.7, 2.8 Hz, 1H), 2.94 – 2.88 (m, 1H), 1.91 – 1.87 (m, 1H), 1.84 – 1.81 (m, 2H), 1.74 – 1.59 (m, 2H), 1.56 – 1.48 (m, 1H), 0.81 (d, *J* = 6.1 Hz, 3H). <sup>13</sup>C NMR (126 MHz, Chloroform-*d*) δ 150.4, 150.3, 131.7, 128.8, 128.3, 127.7, 125.2, 119.1, 110.0, 68.5, 58.8, 36.4, 35.0, 24.7, 22.1. HRMS-ESI (*m/z*): [M+H]<sup>+</sup> calcd for [C<sub>19</sub>H<sub>20</sub>N<sub>2</sub>+H]<sup>+</sup>, 277.1699; found, 277.1705.

**(±)-2m-anti (minor diastereomer):** pale yellow solid (mp: 113-115 °C). IR (neat): 2933, 2224, 1597, 1491, 1254, 1137, 1012, 836, 769, 701 cm<sup>-1</sup>. <sup>1</sup>H NMR (500 MHz, Chloroform-*d*) δ 7.42 (d, *J* = 8.3 Hz, 2H), 7.35 (d, *J* = 8.3 Hz, 2H), 7.07 – 7.04 (m, 2H), 6.79 – 6.77 (m, 3H), 4.41 (dd, *J* = 10.9, 3.4 Hz, 1H), 4.02 – 3.97 (m, 1H), 2.13 – 2.07 (m, 1H), 1.94 – 1.91 (m, 1H), 1.83 – 1.73 (m, 2H), 1.67 – 1.64 (m, 1H), 1.55 – 1.46 (m, 1H), 0.97 (d, *J* = 6.8 Hz, 3H). <sup>13</sup>C NMR (126 MHz, Chloroform-*d*) δ 151.7, 150.5, 132.1, 128.2, 127.7, 124.0, 121.4, 119.1, 109.8, 57.1, 56.1, 37.5, 31.5, 18.6, 11.9. HRMS-ESI (*m/z*): [M+H]<sup>+</sup> calcd for [C<sub>19</sub>H<sub>20</sub>N<sub>2</sub>+H]<sup>+</sup>, 277.1699; found, 277.1705.

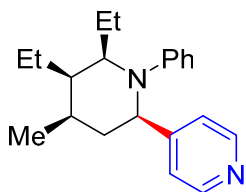

**(±)-2n:** A modification to general procedure E was followed using the piperidine **1n** (46.3 mg, 0.200 mmol, 1.00 equiv), isonicotinonitrile (41.6 mg, 0.400 mmol, 2.00 equiv). In place of Ir(ppy)<sub>3</sub>, [Ir(dtbbpy)(ppy)<sub>2</sub>]PF<sub>6</sub> (80 μL, 0.0020 mmol, 0.010 equiv) was added as a stock solution in DMA (0.025 M). Crude <sup>1</sup>H NMR analysis of the reaction mixture determined the ratio of diastereomers to be >95:5. Purification by preparative TLC (1:5:94 NEt<sub>3</sub>/EtOAc/hexanes) provided the product **2n** (30.7 mg, 50%, >95:5 *dr*) as a pale yellow solid (mp: 77-80 °C). IR (neat): 2961, 2874, 1599, 1490, 1227, 1107, 1020, 816, 778, 702 cm<sup>-1</sup>. <sup>1</sup>H NMR (600 MHz, Chloroform-*d*) δ 8.30 – 8.30 (m, 2H), 7.09 – 7.05 (m, 4H), 6.96 – 6.95 (m, 2H), 6.91 – 6.88 (m, 1H), 3.99 (dd, *J* = 10.9, 4.1 Hz, 1H), 2.80 – 2.77 (m, 1H), 1.98 – 1.91 (m, 1H), 1.78 – 1.71 (m, 1H), 1.65 – 1.62 (m, 1H), 1.61 – 1.52 (m, 2H), 1.47 – 1.40 (m, 1H), 1.36 – 1.27 (m, 1H), 1.08 – 1.01 (m, 1H), 1.02 (t, *J* = 7.7 Hz, 3H), 1.02 (d, *J* = 7.2 Hz, 3H), 0.76 (t, *J* = 7.4 Hz, 3H). <sup>13</sup>C NMR (151 MHz, Chloroform-*d*) δ 154.3, 150.0, 149.3, 128.3, 126.9, 124.4, 123.0, 69.8, 67.3, 42.5, 39.9, 35.4, 24.5, 19.3, 16.9, 16.3, 11.4. HRMS-ESI (*m/z*): [M+H]<sup>+</sup> calcd for [C<sub>21</sub>H<sub>28</sub>N<sub>2</sub>+H]<sup>+</sup>, 309.2325; found, 309.2331.

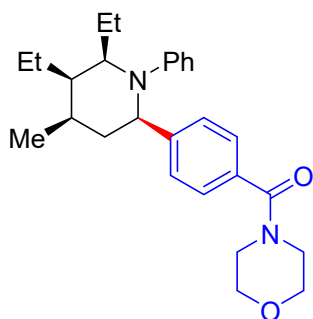

**(±)-2o:** General procedure E was followed using the piperidine **1o** (46.3 mg, 0.200 mmol, 1.00 equiv) and 4-(morpholine-4-carbonyl)benzoyl (86.5 mg, 0.400 mmol, 2.00 equiv). Crude <sup>1</sup>H NMR analysis of the reaction mixture determined the ratio of diastereomers to be >95:5. Purification by silica gel chromatography (eluent 1:20:79 NEt<sub>3</sub>/EtOAc/hexanes) provided the product **2o** (56.2 mg, 67%, >95:5 *dr*) as a pale yellow oil. IR (neat): 2959, 2873, 1631, 1425, 1276, 1114, 836, 728, 699 cm<sup>-1</sup>. <sup>1</sup>H NMR (600 MHz, Chloroform-*d*) δ 7.19 (d, *J* = 7.7 Hz, 2H), 7.12 (d, *J* = 8.4 Hz, 2H), 7.04 – 7.01 (m, 2H), 6.94 – 6.93 (m, 2H), 6.86 – 6.84 (m, 1H), 4.01 (dd, *J* = 8.5, 6.4 Hz, 1H), 3.67 – 3.29 (br m, 8H), 2.83 – 2.80 (m, 1H), 1.99 – 1.92 (m, 1H), 1.78 – 1.71 (m, 1H), 1.65 – 1.62 (m, 1H), 1.62 – 1.59 (m, 2H), 1.49 – 1.42 (m, 1H), 1.38 – 1.26 (m, 1H), 1.08 – 1.01 (m, 1H), 1.02 (t, *J* = 7.7 Hz, 3H), 1.02 (d, *J* = 7.3 Hz, 3H), 0.77 (t, *J* = 7.4 Hz, 3H). <sup>13</sup>C NMR (151 MHz, Chloroform-*d*) δ 170.6, 150.5, 147.6, 132.8, 128.1, 127.9, 126.9, 126.8, 124.0, 69.8, 67.8, 66.9, 48.2, 42.6, 40.3, 35.3, 24.6, 19.3, 17.1, 16.3, 11.5. HRMS-ESI (*m/z*): [M+H]<sup>+</sup> calcd for [C<sub>27</sub>H<sub>36</sub>N<sub>2</sub>O<sub>2</sub>+H]<sup>+</sup>, 421.2850; found, 421.2855.

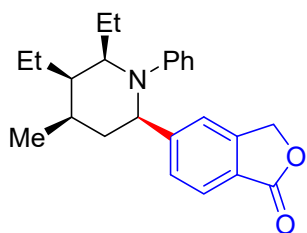

**(±)-2p:** General procedure E was followed using the piperidine **1p** (46.3 mg, 0.200 mmol, 1.00 equiv) and 1-oxo-1,3-dihydroisobenzofuran-5-carbonyl (63.7 mg, 0.400 mmol, 2.00 equiv). Crude <sup>1</sup>H NMR analysis of the reaction mixture determined that the reaction gave the desired product **2p** as a mixture of diastereomers (88:12 *dr*). Purification by preparative TLC (1:5:94 NEt<sub>3</sub>/EtOAc/hexanes) followed by C18 reverse phase chromatography (0-100% CH<sub>3</sub>CN:H<sub>2</sub>O containing 0.1 % TFA) provided the product **2p** (35.1 mg, 48%, 88:12 *dr*) as a pale yellow solid (mp: 113-115 °C). IR (neat): 2957, 2975, 1746, 1618, 1491, 1333, 1248, 1045, 995, 776, 696 cm<sup>-1</sup>. <sup>1</sup>H NMR (600 MHz, Chloroform-*d*) δ 7.75 (d, *J* = 8.0 Hz, 0.12H), 7.63 (d, *J* = 7.9 Hz, 0.88H), 7.47 (d, *J* = 8.1 Hz, 0.12H), 7.38 – 7.36 (m, 1H), 7.26 (s, 0.88H), 7.08 – 7.04 (m, 2H), 6.97 – 6.96 (m, 1.76H), 6.90 – 6.88 (m, 0.88H), 6.72 – 6.69 (m, 0.36H), 5.21 (d, 15.1 Hz, 0.12H), 5.17 (d, 15.1 Hz, 0.12H), 5.13 (s, 1.76H), 4.68 (dd, *J* = 8.4, 3.3 Hz, 0.12H), 4.13 (dd, *J* = 10.6, 4.4 Hz, 0.88H), 3.70 – 3.68 (m, 0.12H), 2.82 – 2.79 (m, 0.88H), 2.12 – 2.06 (m, 0.12H), 2.01 – 1.91 (m, 1H), 1.81 – 1.74 (m, 0.88H), 1.65 – 1.58 (m, 3H), 1.51 – 1.42 (m, 1H), 1.36 – 1.29 (m, 1H), 1.07 – 1.00 (m, 1.36H), 1.04 (t, *J* = 7.7 Hz, 2.64H), 1.03 (d, *J* = 6.9 Hz, 2.64H), 0.97 (t, *J* = 7.4 Hz, 0.36H), 0.76 (t, *J* = 7.4 Hz, 2.64H), 0.68 (t, *J* = 7.6 Hz, 0.36H). <sup>13</sup>C NMR (151 MHz, Chloroform-*d*) δ 171.04, 170.97, 152.7, 152.5, 150.1, 149.4, 146.8, 146.4, 128.9, 128.5, 128.3, 128.2, 127.1, 125.5, 125.1, 124.5, 123.9, 123.8, 121.1, 120.5, 120.0, 119.4, 70.0, 69.5, 69.4, 68.2, 54.9, 44.1, 42.6, 41.9, 40.4, 35.6, 29.7, 27.9, 24.5, 23.3, 22.7, 19.3, 16.9, 16.4, 16.1, 15.0, 12.4, 11.4. HRMS-ESI (*m/z*): [M+H]<sup>+</sup> calcd for [C<sub>24</sub>H<sub>29</sub>NO<sub>2</sub>+H]<sup>+</sup>, 364.2271; found, 364.2278.

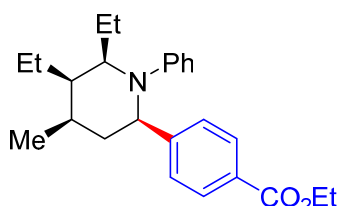

**(±)-2q:** General procedure E was followed using the piperidine **1q** (46.3 mg, 0.200 mmol, 1.00 equiv) and ethyl 4-cyanobenzoate (70.1 mg, 0.400 mmol, 2.00 equiv). Crude <sup>1</sup>H NMR analysis of the reaction mixture determined the ratio of diastereomers to be >95:5. Purification by C18 reverse phase chromatography (0-100% CH<sub>3</sub>CN:H<sub>2</sub>O containing 0.1 % TFA) provided the product **2q** (33.9 mg, 45%, >95:5 *dr*) as a pale yellow solid (mp: 74-77 °C). IR (neat): 2966, 2873, 1718, 1461, 1272, 1108, 1020, 770, 701 cm<sup>-1</sup>. <sup>1</sup>H NMR (600 MHz, Chloroform-*d*) δ 7.76 (d, *J* = 8.7 Hz, 2H), 7.23 (d, *J* = 7.8 Hz, 2H), 7.05 – 7.03 (m, 2H), 6.96 – 6.95 (m, 2H), 6.88 – 6.85 (m, 1H), 4.29 (q, *J* = 7.1 Hz, 2H), 4.05 (dd, *J* = 8.5, 6.4 Hz, 1H), 2.81 – 2.79 (m, 1H), 1.99 – 1.92 (m, 1H), 1.80 – 1.73 (m, 1H), 1.65 – 1.63 (m, 1H), 1.61 – 1.58 (m, 2H), 1.50 – 1.43 (m, 1H), 1.36 – 1.29 (m, 1H), 1.33 (t, *J* = 7.1 Hz, 3H), 1.06 – 1.01 (m, 1H), 1.04 (t, *J* = 7.6 Hz, 3H), 1.02 (d, *J* = 6.9 Hz, 3H), 0.77 (t, *J* = 7.4 Hz, 3H). <sup>13</sup>C NMR (151 MHz, Chloroform-*d*) δ 166.6, 150.7, 150.4, 129.2, 128.3, 128.1, 127.7, 127.1, 124.2, 69.9, 68.0, 60.6, 42.6, 40.3, 35.5, 24.6, 19.3, 17.0, 16.4, 14.3, 11.5. HRMS-ESI (*m/z*): [M+H]<sup>+</sup> calcd for [C<sub>25</sub>H<sub>33</sub>NO<sub>2</sub>+H]<sup>+</sup>, 380.2584; found, 380.2589.

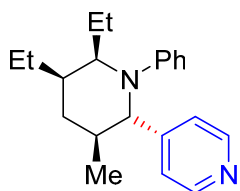

**(±)-2r:** A modification to general procedure E was followed using the piperidine **1r** (46.3 mg, 0.200 mmol, 1.00 equiv), isonicotinonitrile (41.6 mg, 0.400 mmol, 2.00 equiv). In place of Ir(ppy)<sub>3</sub>, [Ir(dtbbpy)(ppy)<sub>2</sub>]PF<sub>6</sub> (80 μL, 0.0020 mmol, 0.010 equiv) was added as a stock solution in DMA (0.025 M). Crude <sup>1</sup>H NMR analysis of the reaction mixture determined the ratio of diastereomers to be >95:5. Purification by preparative TLC (1:5:94 NEt<sub>3</sub>/EtOAc/hexanes) provided the product **2r** (25.6 mg, 42%, >95:5 *dr*) as a pale yellow waxy solid. IR (neat): 2959, 2873, 1597, 1493, 1235, 1128, 990, 811, 753, 699 cm<sup>-1</sup>. <sup>1</sup>H NMR (600 MHz, Chloroform-*d*) δ 8.33 (d, *J* = 5.9 Hz, 2H), 7.19 (d, *J* = 6.0 Hz, 2H), 7.01 – 6.98 (m, 2H), 6.83 – 6.82 (m, 2H), 6.74 – 6.72 (m, 1H), 3.81 (d, *J* = 9.7 Hz, 1H), 3.53 (q, *J* = 4.4 Hz, 1H), 2.15 – 2.10 (m, 1H), 1.68 (dt, *J* = 13.2, 3.7 Hz, 1H), 1.63 – 1.54 (m, 2H), 1.42 – 1.34 (m, 2H), 1.31 – 1.23 (m, 1H), 1.14 (apparent q, *J* = 12.6 Hz, 1H), 1.00 (t, *J* = 7.4 Hz, 3H), 0.75 (d, *J* = 6.6 Hz, 3H), 0.49 (t, *J* = 7.6

Hz, 3H).  $^{13}\text{C}$  NMR (151 MHz, Chloroform-*d*)  $\delta$  153.4, 150.9, 149.0, 128.0, 125.2, 124.1, 121.6, 68.3, 64.3, 43.5, 40.1, 34.0, 26.1, 19.1, 16.7, 15.0, 12.0. HRMS-ESI (*m/z*):  $[\text{M}+\text{H}]^+$  calcd for  $[\text{C}_{21}\text{H}_{28}\text{N}_2+\text{H}]^+$ , 309.2325; found, 309.2331.

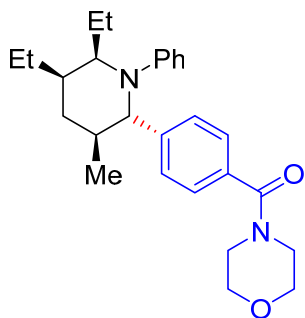

**(±)-2s:** General procedure E was followed using the piperidine **1s** (46.3 mg, 0.200 mmol, 1.00 equiv) and 4-(morpholine-4-carbonyl)benzoyl nitrile (86.5 mg, 0.400 mmol, 2.00 equiv). Crude  $^1\text{H}$  NMR analysis of the reaction mixture determined the ratio of diastereomers to be >95:5. Purification by silica gel chromatography (eluent 1:20:79  $\text{NEt}_3/\text{EtOAc}/\text{hexanes}$ ) provided the product **2s** (48.8 mg, 58%, >95:5 *dr*) as a pale yellow oil. IR (neat): 2959, 2872, 1630, 1426, 1277, 1114, 1012, 911, 728, 699  $\text{cm}^{-1}$ .  $^1\text{H}$  NMR (600 MHz, Chloroform-*d*)  $\delta$  7.28 (d,  $J = 8.0$  Hz, 2H), 7.15 (d,  $J = 8.2$  Hz, 2H), 6.96 – 6.93 (m, 2H), 6.82 – 6.81 (m, 2H), 6.68 – 6.66 (m, 1H), 3.82 (d,  $J = 9.5$  Hz, 1H), 3.66 – 3.28 (br m, 8H), 3.54 (apparent q,  $J = 4.5$  Hz, 1H), 2.15 – 2.10 (m, 1H), 1.68 – 1.56 (m, 3H), 1.42 – 1.34 (m, 2H), 1.30 – 1.22 (m, 1H), 1.13 (apparent q,  $J = 12.4$  Hz, 1H), 0.99 (t,  $J = 7.4$  Hz, 3H), 0.73 (d,  $J = 6.4$  Hz, 3H), 0.48 (t,  $J = 7.6$  Hz, 3H).  $^{13}\text{C}$  NMR (151 MHz, Chloroform-*d*)  $\delta$  170.5, 151.3, 146.2, 132.7, 128.8, 127.7, 126.6, 125.4, 121.1, 68.4, 66.8, 64.6, 48.1, 43.5, 42.5, 40.3, 34.2, 26.1, 19.3, 16.7, 15.0,

12.0. HRMS-ESI (*m/z*):  $[\text{M}+\text{H}]^+$  calcd for  $[\text{C}_{27}\text{H}_{36}\text{N}_2\text{O}_2+\text{H}]^+$ , 421.2850; found, 421.2855.

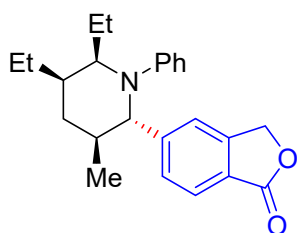

**(±)-2t:** General procedure E was followed using the piperidine **1t** (46.3 mg, 0.200 mmol, 1.00 equiv) and 1-oxo-1,3-dihydroisobenzofuran-5-carbonitrile (63.7 mg, 0.400 mmol, 2.00 equiv). Crude  $^1\text{H}$  NMR analysis of the reaction mixture determined the ratio of diastereomers to be >95:5. Purification by silica gel chromatography (eluent 1:5:94  $\text{NEt}_3/\text{EtOAc}/\text{hexanes}$ ) provided the product **2t** (52.7 mg, 73%, >95:5 *dr*) as a pale yellow solid (mp: 99–101  $^{\circ}\text{C}$ ). IR (neat): 2954, 2873, 1756, 1596, 1492, 1239, 1046, 1001, 757, 697  $\text{cm}^{-1}$ .  $^1\text{H}$  NMR (600 MHz, Chloroform-*d*)  $\delta$  7.66 (d,  $J = 7.9$  Hz, 1H), 7.45 (d,  $J = 7.9$  Hz, 1H), 7.39 (s, 1H), 7.00 – 6.97 (m, 2H), 6.84 – 6.83 (m, 2H), 6.73 – 6.71 (m, 1H), 5.17 (d,  $J = 15.1$  Hz, 1H), 5.11 (d,  $J = 15.1$  Hz, 1H), 3.95 (d,  $J = 9.6$  Hz, 1H), 3.55 (apparent q,  $J = 4.4$  Hz, 1H), 2.17 – 2.11 (m, 1H), 1.71 – 1.56 (m, 3H), 1.44 – 1.36 (m, 2H), 1.32 – 1.24 (m, 1H), 1.16 (apparent q,  $J = 12.5$  Hz, 1H), 1.01 (t,  $J = 7.4$  Hz, 3H), 0.74 (d,  $J = 6.4$  Hz, 3H), 0.49 (t,  $J = 7.6$  Hz, 3H).  $^{13}\text{C}$  NMR (151 MHz, Chloroform-*d*)  $\delta$  171.0, 151.6, 151.0, 146.3, 130.1, 128.0, 125.3, 124.7, 123.9, 121.7, 121.6, 69.4, 68.5, 65.0, 43.6, 40.7, 34.1, 26.1, 19.2, 16.7, 15.0, 12.0. HRMS-ESI (*m/z*):  $[\text{M}+\text{H}]^+$  calcd for  $[\text{C}_{24}\text{H}_{29}\text{NO}_2+\text{H}]^+$ , 364.2271; found, 364.2277.

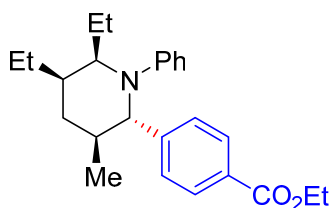

**(±)-2u:** General procedure E was followed using the piperidine **1u** (46.3 mg, 0.200 mmol, 1.00 equiv) and ethyl 4-cyanobenzoate (70.1 mg, 0.400 mmol, 2.00 equiv). Crude  $^1\text{H}$  NMR analysis of the reaction mixture determined the ratio of diastereomers to be >95:5. Purification by C18 reverse phase chromatography (0–100%  $\text{CH}_3\text{CN}:\text{H}_2\text{O}$  containing 0.1 % TFA) provided the product **2u** (43.9 mg, 58%, >95:5 *dr*) as a pale yellow solid (mp: 78–80  $^{\circ}\text{C}$ ). IR (neat): 2959, 2878, 1707, 1609, 1494, 1369, 1266, 1109, 1022, 770, 703  $\text{cm}^{-1}$ .  $^1\text{H}$  NMR (600 MHz, Chloroform-*d*)  $\delta$  7.80 (d,  $J = 6.8$  Hz, 2H), 7.33 (d,  $J = 7.8$  Hz, 2H), 6.99 – 6.97 (m, 2H), 6.85 – 6.84 (m, 2H), 6.72 – 6.69 (m, 1H), 4.29 (q,  $J = 7.1$  Hz, 2H), 3.87 (d,  $J = 9.5$  Hz, 1H), 3.56 (apparent q,  $J = 4.5$  Hz, 1H), 2.17 – 2.12 (m, 1H), 1.69 – 1.58 (m, 3H), 1.44 – 1.35 (m, 2H), 1.33 (t,  $J = 7.1$  Hz, 3H), 1.30 – 1.24 (m, 1H), 1.15 (apparent q,  $J = 12.5$  Hz, 1H), 1.01 (t,  $J = 7.4$  Hz, 3H), 0.73 (d,  $J = 6.2$  Hz, 3H), 0.50 (t,  $J = 7.6$  Hz, 3H).  $^{13}\text{C}$  NMR (151 MHz, Chloroform-*d*)  $\delta$  166.6, 151.3, 149.4, 128.9, 128.7, 128.3, 127.8, 125.4, 121.3, 68.5, 64.8, 60.6, 43.6, 40.4, 34.2, 26.2, 19.2, 16.7, 15.0, 14.3, 12.1. HRMS-ESI (*m/z*):  $[\text{M}+\text{H}]^+$  calcd for  $[\text{C}_{25}\text{H}_{33}\text{NO}_2+\text{H}]^+$ , 380.2584; found, 380.2589.

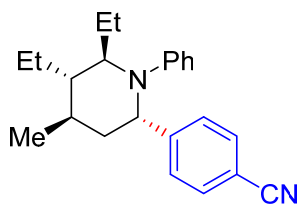

**(±)-2v:** General procedure E was followed using the piperidine **5** (46.3 mg, 0.200 mmol, 1.00 equiv) and 1,4-dicyanobenzene (51.3 mg, 0.400 mmol, 2.00 equiv). Crude  $^1\text{H}$  NMR analysis of the reaction mixture determined that the reaction gave the desired product **2v** as a mixture of diastereomers (84:16 *dr*). Purification by silica gel chromatography (eluent 1:3:96  $\text{NEt}_3/\text{EtOAc}/\text{hexanes}$ ) provided the product **2v** (52.8 mg, 79%, 84:16 *dr*) as a pale yellow oil. IR (neat): 2958, 2873, 2227, 1596, 1497, 1461, 1251, 1018, 909, 843, 731, 691  $\text{cm}^{-1}$ .  $^1\text{H}$  NMR (500 MHz, Chloroform-*d*)  $\delta$  7.53 (d,  $J = 7.9$  Hz, 1.68H), 7.46 (d,  $J = 7.9$  Hz, 0.32H), 7.40 (d,  $J = 7.9$  Hz, 1.68H), 7.33 (d,  $J = 7.9$  Hz, 0.32H), 7.11 – 7.06 (m, 2H), 6.78 – 6.74 (m, 0.48H), 6.70 – 6.65 (m, 2.52H), 4.75 – 4.74 (m, 0.84H), 4.40 – 4.37 (m, 0.16H), 3.70 – 3.67 (m, 0.84H), 3.40 – 3.36 (m, 0.16H), 2.30 – 2.24 (m, 0.84H), 1.92 – 1.89 (m, 0.16H), 1.81 – 1.73 (m, 1H), 1.69 – 1.66 (m, 0.84H), 1.60 – 1.51 (m, 2.84H), 1.46 – 1.43 (m, 0.64H), 1.35 – 1.31 (m, 0.84H), 1.28 – 1.24 (m, 0.84H), 1.08 – 1.05 (m, 3H), 1.01 (t,  $J = 7.3$  Hz, 0.48H), 0.96 (d,  $J = 6.6$  Hz, 2.52H), 0.91 – 0.88 (m, 3H).  $^{13}\text{C}$  NMR (126 MHz, Chloroform-*d*) 151.3, 151.2, 150.1, 148.9, 132.2, 132.0, 128.7, 127.7, 127.5, 120.2, 119.5, 119.0, 118.2,

117.5, 110.0, 63.7, 61.8, 61.2, 57.1, 46.6, 45.5, 41.8, 38.0, 32.5, 28.0, 27.9, 27.7, 27.6, 25.4, 21.9, 21.5, 12.0, 11.9, 10.3, 9.7. HRMS-ESI (m/z): [M+H]<sup>+</sup> calcd for [C<sub>23</sub>H<sub>28</sub>N<sub>2</sub>+H]<sup>+</sup>, 333.2325; found, 333.2331.

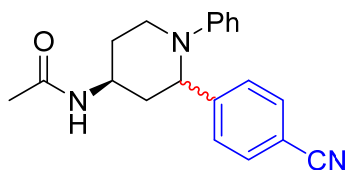

**(±)-2w:** A modification to General procedure E was followed using N-(1-phenylpiperidin-4-yl)acetamide **6a** (43.7 mg, 0.200 mmol, 1.00 equiv) and 1,4-dicyanobenzene (25.6 mg, 0.200 mmol, 1.00 equiv). Crude <sup>1</sup>H NMR analysis of the reaction mixture determined that the reaction gave the desired product **2w** as a mixture of diastereomers (56:44 *dr*). Purification by preparatory TLC (eluent 1:99 NEt<sub>3</sub>:EtOAc) provided the product **2w** (60.3 mg, 94%, 57:43 *dr*) as a pale yellow waxy solid. IR (neat): 2941, 2227, 1650, 1587, 1493, 11369, 1109, 909, 835, 727, 698 cm<sup>-1</sup>. <sup>1</sup>H NMR (600 MHz, Chloroform-*d*) δ 7.60 (d, *J* = 8.2 Hz, 0.86H), 7.50 (d, *J* = 8.1 Hz, 0.86H), 7.44 (d, *J* = 8.2 Hz, 1.14H), 7.36 (d, *J* = 8.1 Hz, 1.14H), 7.24 – 7.21 (m, 0.86H), 7.12 – 7.09 (m, 1.14H), 6.91 – 6.87 (m, 2.57H), 6.82 – 6.79 (m, 0.43H), 5.40 (d, *J* = 7.5 Hz, 0.43H), 5.35 (d, *J* = 8.1 Hz, 0.57H), 5.07 – 5.06 (m, 0.43H), 4.21 (dd, *J* = 10.9, 3.0 Hz, 0.57H), 4.10 – 3.98 (m, 1H), 3.68 (dt, *J* = 14.0, 4.4 Hz, 0.43H), 3.53 (dt, *J* = 12.7, 3.7 Hz, 0.57H), 3.22 – 3.17 (m, 0.43H), 2.96 – 2.91 (m, 0.57H), 2.53 – 2.50 (m, 0.43H), 2.25 – 2.23 (m, 0.57H), 2.10 – 2.08 (m, 0.57H), 1.98 – 1.96 (m, 0.43H), 1.98 (s, 1.29H), 1.96 (s, 1.71H), 1.90 – 1.85 (m, 0.43H), 1.74 (dq, *J* = 12.0, 4.1 Hz, 0.57H), 1.65 – 1.58 (m, 0.43H), 1.46 (apparent q, *J* = 11.5 Hz, 0.57H). <sup>13</sup>C NMR (151 MHz, Chloroform-*d*) δ 169.5, 169.4, 151.3, 149.7, 149.2, 146.8, 132.5, 132.2, 129.5, 128.8, 127.92, 127.87, 123.8, 123.5, 119.1, 118.8, 115.6, 110.7, 110.4, 62.7, 57.5, 56.1, 46.9, 43.5, 43.4, 42.8, 34.9, 32.9, 30.8, 23.48, 23.46. HRMS-ESI (m/z): [M+H]<sup>+</sup> calcd for [C<sub>20</sub>H<sub>21</sub>N<sub>3</sub>O+H]<sup>+</sup>, 320.1757; found, 320.1758.

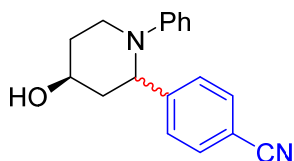

**(±)-2x:** A modification to General procedure E was followed using 1-phenylpiperidin-4-ol (35.4 mg, 0.200 mmol, 1.00 equiv) and 1,4-dicyanobenzene (25.6 mg, 0.200 mmol, 1.00 equiv). Crude <sup>1</sup>H NMR analysis of the reaction mixture determined that the reaction gave the desired product **2x** as a mixture of diastereomers (1:1 *dr*). Purification by C18 reverse phase chromatography (0-100% CH<sub>3</sub>CN:H<sub>2</sub>O containing 0.1 % TFA) provided the product **2x** (26.1 mg, 47%, 48:52 *dr*) as a pale yellow waxy solid. IR (neat): 2926, 2227, 1596, 1493, 1258, 1064, 980, 824, 751, 697 cm<sup>-1</sup>. <sup>1</sup>H NMR (500 MHz, Chloroform-*d*) δ 7.52 (d, *J* = 8.2 Hz, 1.04H), 7.46 (d, *J* = 8.1 Hz, 0.96H), 7.41 (d, *J* = 8.1 Hz, 1.04H), 7.37 (d, *J* = 8.1 Hz, 0.96H), 7.19 – 7.15 (m, 1.04H), 7.12 – 7.09 (m, 0.96H), 6.91 – 6.87 (m, 2.48H), 6.85 – 6.82 (m, 0.52H), 4.89 – 4.87 (m, 0.52H), 4.18 (dd, *J* = 10.7, 3.2 Hz, 0.48H), 4.01 – 3.99 (m, 0.52H), 3.92 – 3.86 (m, 0.48H), 3.58 – 3.53 (m, 1H), 3.25 – 3.20 (m, 0.52H), 2.91 (t, *J* = 11.0 Hz, 0.48H), 2.21 – 2.16 (m, 1H), 2.12 – 2.06 (m, 1H), 2.02 – 1.97 (m, 0.52H), 1.86 (qd, *J* = 12.0, 4.2 Hz, 0.48H), 1.80 – 1.74 (m, 0.52H), 1.67 (apparent q, *J* = 10.8 Hz, 0.48H). <sup>13</sup>C NMR (151 MHz, Chloroform-*d*) δ 151.2, 150.7, 149.4, 148.8, 132.3, 132.2, 129.1, 128.7, 127.84, 127.82, 123.4, 123.1, 120.7, 119.1, 118.8, 110.30, 110.29, 68.6, 64.6, 62.0, 57.7, 54.8, 46.6, 45.0, 40.3, 35.4, 33.7. HRMS-ESI (m/z): [M+H]<sup>+</sup> calcd for [C<sub>18</sub>H<sub>18</sub>N<sub>2</sub>O+H]<sup>+</sup>, 279.1492; found, 279.1495.

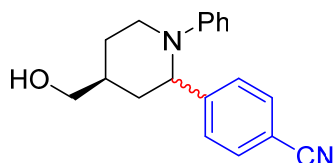

**(±)-2y:** A modification to General procedure E was followed using (1-phenylpiperidin-4-yl)methanol (38.3 mg, 0.200 mmol, 1.00 equiv) and 1,4-dicyanobenzene (25.6 mg, 0.200 mmol, 1.00 equiv). Crude <sup>1</sup>H NMR analysis of the reaction mixture determined that the reaction gave the desired product **2y** as a mixture of diastereomers (68:32 *dr*). Purification by C18 reverse phase chromatography (0-100% CH<sub>3</sub>CN:H<sub>2</sub>O containing 0.1 % TFA) provided the product **2y** (31.9 mg, 55%, 68:32 *dr*) as a pale yellow waxy solid. Purification by preparatory TLC (eluent 90:10 DCM:EtOAc) provided fractions of each of the diastereomers separately for characterization (major: 15.8 mg, 27%; minor: 4.4 mg, 8%).

**(±)-2y-syn (major diastereomer):** IR (neat): 2916, 2226, 1597, 1492, 1222, 1027, 913, 833, 769, 698 cm<sup>-1</sup>. <sup>1</sup>H NMR (600 MHz, Chloroform-*d*) δ 7.44 (d, *J* = 8.3 Hz, 2H), 7.37 (d, *J* = 8.2 Hz, 2H), 7.12 – 7.09 (m, 2H), 6.91 – 6.90 (m, 2H), 6.89 – 6.86 (m, 1H), 4.10 (dd, *J* = 11.0, 3.1 Hz, 1H), 3.60 – 3.57 (m, 2H), 3.54 – 3.51 (m, 1H), 2.86 (td, *J* = 12.1, 2.8 Hz, 1H), 2.04 – 2.01 (m, 1H), 1.91 – 1.88 (m, 1H), 1.86 – 1.79 (m, 1H), 1.58 (qd, *J* = 12.1, 4.2 Hz, 1H), 1.33 (apparent q, *J* = 12.0 Hz, 1H). <sup>13</sup>C NMR (151 MHz, Chloroform-*d*) δ 151.9, 150.5, 132.2, 128.7, 127.8, 123.6, 123.0, 118.9, 110.2, 67.5, 63.4, 56.8, 39.8, 38.8, 29.2. HRMS-ESI (m/z): [M+H]<sup>+</sup> calcd for [C<sub>19</sub>H<sub>20</sub>N<sub>2</sub>O+H]<sup>+</sup>, 293.1648; found, 293.1654.

**(±)-2y-anti (minor diastereomer):** IR (neat): 2923, 2227, 1596, 1500, 1251, 1031, 988, 835, 750, 690 cm<sup>-1</sup>. <sup>1</sup>H NMR (600 MHz, Chloroform-*d*) δ 7.59 (d, *J* = 8.3 Hz, 2H), 7.42 (d, *J* = 8.0 Hz, 2H), 7.23 – 7.20 (m, 2H), 6.84 – 6.82 (m, 2H), 6.76 – 6.74 (m, 1H), 5.16 – 5.15 (m, 1H), 3.79 (dt, *J* = 13.3, 4.3 Hz, 1H), 3.56 – 3.50 (m, 2H), 3.25 – 3.21 (m, 1H), 2.34 – 2.31 (m, 1H), 1.86 – 1.80 (m, 2H), 1.73 – 1.66 (m, 1H), 1.50 – 1.43 (m, 1H). <sup>13</sup>C NMR (151 MHz, Chloroform-*d*) δ 149.8, 148.0, 132.3, 129.4, 128.0, 118.9, 118.0, 114.3, 110.3, 67.4, 57.1, 43.0, 33.3, 32.4, 27.4. HRMS-ESI (m/z): [M+H]<sup>+</sup> calcd for [C<sub>19</sub>H<sub>20</sub>N<sub>2</sub>O+H]<sup>+</sup>, 293.1648; found, 293.1654.

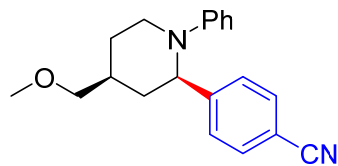

**(±)-2z**: A modification to General procedure E was followed using 4-(methoxymethyl)-1-phenylpiperidine **6b** (41.1 mg, 0.200 mmol, 1.00 equiv) and 1,4-dicyanobenzene (25.6 mg, 0.200 mmol, 1.00 equiv). Crude  $^1\text{H}$  NMR analysis of the reaction mixture determined that the reaction gave the desired product **2z** as a mixture of diastereomers (59:41 *dr*). Purification by preparative TLC (eluent 1:20:79  $\text{NEt}_3/\text{EtOAc}/\text{hexanes}$ ) provided the product **2z** (41.7 mg, 68%, 62:38 *dr*) as a pale yellow waxy solid. Purification by C18 reverse phase chromatography (0-100%  $\text{CH}_3\text{CN}:\text{H}_2\text{O}$  containing 0.1 % TFA) provided fractions of each of the diastereomers separately for characterization (major: 21.3 mg, 35%; minor: 15.1 mg, 25%).

**(±)-2z-syn** (*major diastereomer*): IR (neat): 2922, 2226, 1597, 1492, 1218, 1096, 947, 832, 769, 698  $\text{cm}^{-1}$ .  $^1\text{H}$  NMR (600 MHz, Chloroform-*d*)  $\delta$  7.44 (d,  $J = 8.2$  Hz, 2H), 7.37 (d,  $J = 8.2$  Hz, 2H), 7.11 – 7.09 (m, 2H), 6.91 – 6.89 (m, 2H), 6.88 – 6.85 (m, 1H), 4.09 (dd,  $J = 11.1, 3.2$  Hz, 1H), 3.57 (dt,  $J = 12.1, 3.5$  Hz, 1H), 3.33 (s, 3H), 3.33 – 3.30 (m, 1H), 3.23 – 3.21 (m, 1H), 2.85 (td,  $J = 12.1, 2.6$  Hz, 1H), 2.04 – 2.01 (m, 1H), 1.94 – 1.84 (m, 2H), 1.57 (qd,  $J = 12.0, 4.1$  Hz, 1H), 1.33 (apparent q,  $J = 11.7$  Hz, 1H).  $^{13}\text{C}$  NMR (151 MHz, Chloroform-*d*) 152.0, 150.5, 132.1, 128.6, 127.8, 123.5, 122.9, 119.0, 110.1, 77.5, 63.4, 59.0, 56.8, 40.3, 36.6, 29.5. HRMS-ESI ( $m/z$ ):  $[\text{M}+\text{H}]^+$  calcd for  $[\text{C}_{20}\text{H}_{22}\text{N}_2\text{O}+\text{H}]^+$ , 307.1805; found, 307.1810.

**(±)-2z-anti** (*minor diastereomer*): IR (neat): 2923, 2852, 2226, 1596, 1501, 1251, 1095, 979, 837, 750, 691  $\text{cm}^{-1}$ .  $^1\text{H}$  NMR (600 MHz, Chloroform-*d*)  $\delta$  7.58 (d,  $J = 8.2$  Hz, 2H), 7.41 (d,  $J = 8.1$  Hz, 2H), 7.22 – 7.20 (m, 2H), 6.83 – 6.81 (m, 2H), 6.76 – 6.73 (m, 1H), 5.13 – 5.12 (m, 1H), 3.76 (dt,  $J = 13.4, 4.2$  Hz, 1H), 3.31 (s, 3H), 3.27 – 3.19 (m, 3H), 2.32 – 2.29 (m, 1H), 1.84 – 1.77 (m, 3H), 1.49 – 1.42 (m, 1H).  $^{13}\text{C}$  NMR (126 MHz, Chloroform-*d*)  $\delta$  149.8, 148.1, 132.3, 129.4, 128.0, 118.9, 117.9, 114.2, 110.3, 77.3, 58.9, 57.1, 43.0, 32.7, 30.9, 27.7. HRMS-ESI ( $m/z$ ):  $[\text{M}+\text{H}]^+$  calcd for  $[\text{C}_{20}\text{H}_{22}\text{N}_2\text{O}+\text{H}]^+$ , 307.1805; found, 308.1810.

### Stereochemical Assignments

1. The relative stereochemistry of **(±)-2a** was determined by X-ray crystallography (see section S66) and all other 2,3,4,6-substituted analogues were assigned by analogy.
2. The relative stereochemistry of **(±)-2e** was determined by X-ray crystallography (see section S66) and all other 2,3,5,6-substituted analogues were assigned by analogy.
3. The relative stereochemistry of the major diastereomer of **(±)-2z** was determined by X-ray crystallography (see section S66) and all other 4,6-substituted analogues were assigned by analogy.
4. The relative stereochemistries of **(±)-2l** and **(±)-2m** were each determined by 1D selective NOE experiments (see section S136).
5. The relative stereochemistry of **(±)-5** and **(±)-2v** were each determined by X-ray crystallography (see section S66).

## Epimerization Studies

Supplemental Table S5

| Entry <sup>a</sup> | Time (min)                                    | % Yield 2a-syn <sup>b</sup> | % Yield 2a-anti <sup>b</sup> | % Yield 1a <sup>b</sup> |
|--------------------|-----------------------------------------------|-----------------------------|------------------------------|-------------------------|
| 1                  | 2                                             | 12                          | 13                           | 66                      |
| 2                  | 4                                             | 19                          | 20                           | 51                      |
| 3                  | 8                                             | 31                          | 34                           | 23                      |
| 4                  | 16                                            | 38                          | 37                           | <5                      |
| 5                  | 24                                            | 60                          | 28                           | <5                      |
| 6                  | 32                                            | 63                          | 21                           | <5                      |
| 7                  | 48                                            | 73                          | 14                           | <5                      |
| 8                  | 120                                           | 83                          | <5                           | <5                      |
| 9                  | 120 (16 min with light then dark for 104 min) | 46                          | 36                           | <5                      |

<sup>a</sup>Conditions: 0.1 mmol of **1a**, photoreactor 50% LED, 450 nm. <sup>b</sup>Yields determined by crude <sup>1</sup>H NMR analysis with 2,6-dimethoxytoluene as an external standard.

Supplemental Table S6

| Entry <sup>a</sup> | Time (min) | % Yield 2m-syn <sup>b</sup> | % Yield 2m-anti <sup>b</sup> | % Yield 1m <sup>b,c</sup> |
|--------------------|------------|-----------------------------|------------------------------|---------------------------|
| 1                  | 1          | 9                           | 7                            | 44                        |
| 2                  | 2          | 17                          | 14                           | 10                        |
| 3                  | 3          | 22                          | 18                           | 13                        |
| 4                  | 5          | 31                          | 26                           | 20                        |
| 5                  | 10         | 45                          | 36                           | <5                        |
| 6                  | 20         | 47                          | 36                           | <5                        |
| 7                  | 120        | 50                          | 28                           | <5                        |

<sup>a</sup>Conditions: 0.1 mmol of **1m**, photoreactor 50% LED, 450 nm. <sup>b</sup>Yields determined by crude <sup>1</sup>H NMR analysis with 2,6-dimethoxytoluene as an external standard. <sup>c</sup>**1m** is volatile, mass balance isn't accurate.

Supplemental Table S7

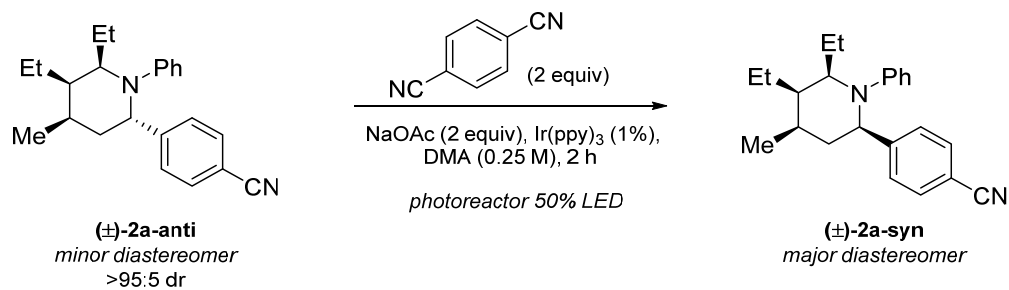

| Entry <sup>a</sup> | Conditions                                                                                                                            | % Yield <b>2a-anti</b> <sup>b</sup> | % Yield <b>2a-syn</b> <sup>b</sup> |
|--------------------|---------------------------------------------------------------------------------------------------------------------------------------|-------------------------------------|------------------------------------|
| 1                  | As above                                                                                                                              | <5                                  | 85                                 |
| 2                  | No 1,4-dicyanobenzene                                                                                                                 | 67                                  | 21                                 |
| 3                  | No NaOAc                                                                                                                              | <5                                  | 74                                 |
| 4                  | No 1,4-dicyanobenzene, no NaOAc                                                                                                       | 62                                  | 15                                 |
| 5                  | No NaOAc, no Ir(ppy) <sub>3</sub>                                                                                                     | 60                                  | 28                                 |
| 6                  | No NaOAc, no 1,4-dicyanobenzene, 16 h<br>[Ir(dtbbpy)(ppy) <sub>2</sub> ] <sub>2</sub> PF <sub>6</sub> instead of Ir(ppy) <sub>3</sub> | <5                                  | 72                                 |

<sup>a</sup>Conditions: 0.05 mmol of **2a-anti**, photoreactor 50% LED, 450 nm. <sup>b</sup>Yields determined by crude <sup>1</sup>H NMR analysis with 2,6-dimethoxytoluene as an external standard.

Supplemental Table S8

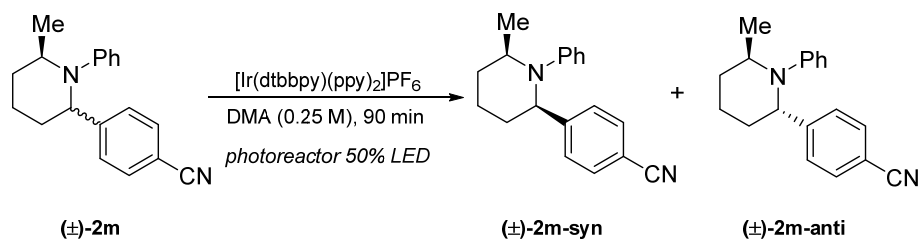

| Entry <sup>a</sup> | Starting isomer           | % Yield <b>2m-syn</b> <sup>b</sup> | % Yield <b>2m-anti</b> <sup>b</sup> |
|--------------------|---------------------------|------------------------------------|-------------------------------------|
| 1                  | <b>2m-syn</b> (>95:5 dr)  | 27                                 | 62                                  |
| 2                  | <b>2m-anti</b> (>95:5 dr) | 22                                 | 74                                  |

<sup>a</sup>Conditions: 0.1 mmol of **2m**, photoreactor 50% LED, 450 nm. <sup>b</sup>Yields determined by crude <sup>1</sup>H NMR analysis with 2,6-dimethoxytoluene as an external standard.



## Mechanistic Experiments on the formation of DCB- and Ir(ppy)<sub>3</sub><sup>±</sup>

### I. Excited State Quenching Measurements with TCSPC

TCSPC was used to measure excited state ET rate constants between Ir(ppy)<sub>3</sub> and various reagents. Each TCSPC trace was modeled to a single-exponential decay appropriate for the unimolecular or pseudo-first order kinetics. Raw TCSPC data for \*Ir(ppy)<sub>3</sub> quenching with DCB is given in Figure S1A. The plot of  $k_{\text{obs}}$  versus [DCB] is shown in Figure S1B giving  $k_{\text{quench}}$  as the slope. The excited state lifetime of the Ir(ppy)<sub>3</sub> was measured as  $\tau = 1.525 \mu\text{s}$  in DMA.

#### Ir(ppy)<sub>3</sub><sup>\*</sup> quenching with dicyanobenzene

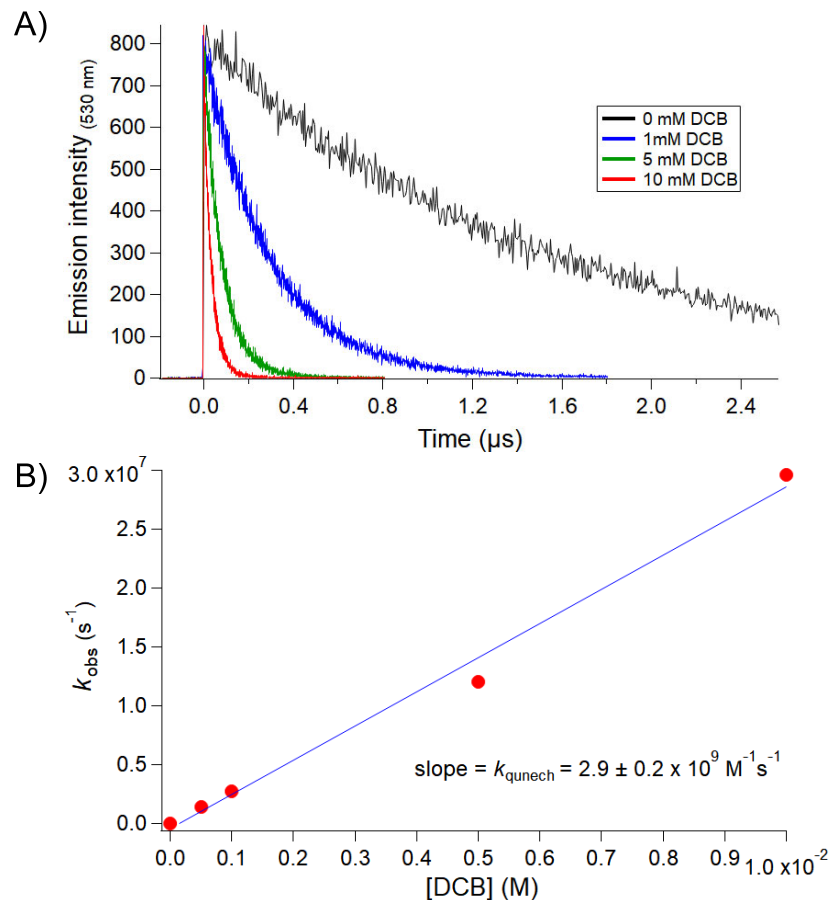

Figure S1: A) TCSPC data of Ir(ppy)<sub>3</sub> in the presence of increasing amounts of DCB. Time zero indicates when the 390 nm excitation pulse occurred. Excited state decay was modeled to a single exponential, yielding a pseudo first-order  $k_{\text{obs}}$ . B) Plot of  $k_{\text{obs}}$  obtained from single exponential fits to data in A vs [DCB]. Slope of the line gives the second order rate constant for excited state ET from \*Ir(ppy)<sub>3</sub> to DCB,  $k_{\text{quench}}$ .



### \*Ir(ppy)<sub>3</sub> quenching with piperidine 1m

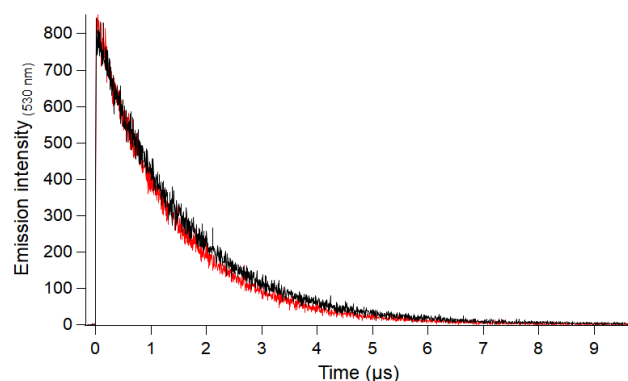

Figure S2: TCSPC data for Ir(ppy)<sub>3</sub><sup>+</sup> without and with piperidine **1m**. Ir(ppy)<sub>3</sub> only (black) and 0.25 M piperidine **1m** added to Ir(ppy)<sub>3</sub> (red) are shown. Less than 10% excited state lifetime quenching is observed at the high [**1m**].

### II. Spectroelectrochemistry measurements of Ir(ppy)<sub>3</sub> oxidation to Ir(ppy)<sub>3</sub><sup>+</sup>

Spectroelectrochemistry was used to obtain an authentic spectrum of Ir(ppy)<sub>3</sub><sup>+</sup> (Figure S3). Figure S3 shows our electrochemical and spectroelectrochemical investigations of Ir(ppy)<sub>3</sub><sup>+</sup>.

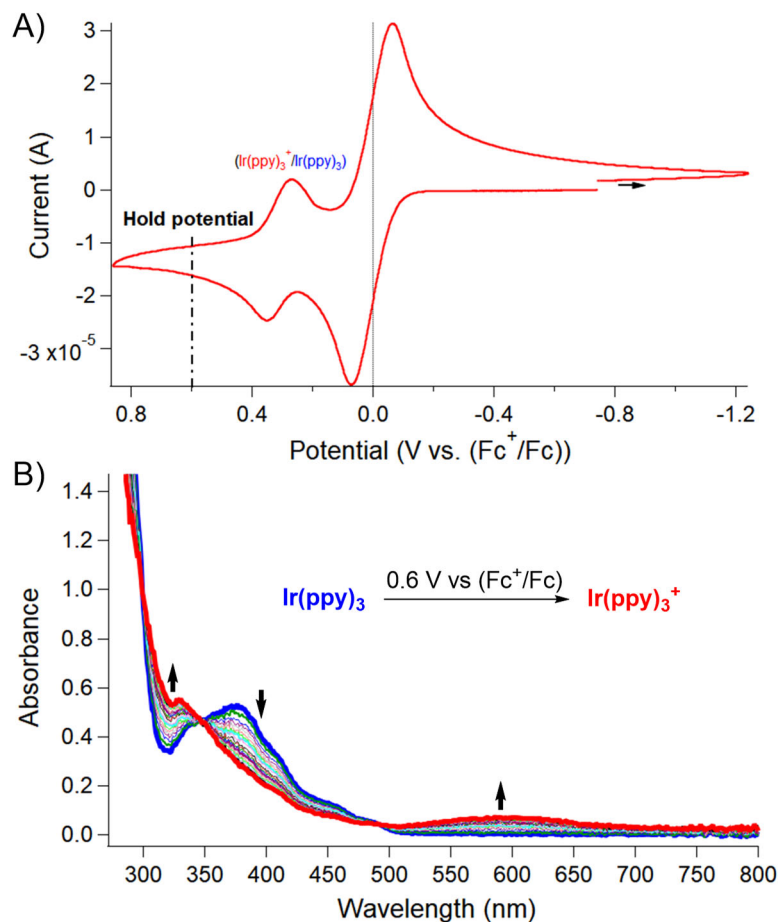

Figure S3: A) Cyclic voltammogram of  $\sim 10^{-5}$  M Ir(ppy)<sub>3</sub> in 100 mM tetrabutylammonium hexafluorophosphate (TBAPF<sub>6</sub>) solution of DMA with added ferrocene (Fc) as an internal standard. The Ir(ppy)<sub>3</sub><sup>+</sup>/Ir(ppy)<sub>3</sub> couple was observed at 0.31 V vs (Fc<sup>+</sup>/Fc). We chose 0.6 V as the hold potential for our bulk spectroelectrochemistry measurement. Initial sweep direction is indicated with an arrow. Measurement used a glassy carbon working electrode, platinum wire auxiliary electrode, and a Ag<sup>+</sup>/Ag pseudo-reference in 100 mM TBAPF<sub>6</sub> DMA solution. B) Spectroelectrochemistry data collected for 0.4 mM Ir(ppy)<sub>3</sub> in a 0.2 cm pathlength spectroelectrochemistry cell in 100 mM TBAPF<sub>6</sub> DMA solution. Scan rate for UV-Vis collection was 60 nm/sec with 12 seconds in between spectra collection.

Bolded blue spectrum was obtained before any charge was passed, corresponding to  $\text{Ir}(\text{ppy})_3$ . Changes in absorption over time are indicated with arrows. A platinum mesh was used at the working electrode. Absorption spectra were collected every 10 seconds until no changes were observed and no more charge was passed, indicating full conversion to  $\text{Ir}(\text{ppy})_3^+$ . This species is indicated by the bolded red spectrum.

### III. Transient absorption measurements

Transient absorption measurements were used to monitor the formation and decay of  $\text{DCB}^{\bullet-}$  and  $\text{Ir}(\text{ppy})_3^+$ . The  $\text{Ir}(\text{ppy})_3/\text{Ir}(\text{ppy})_3^+$  isosbestic point observed at 346 nm was used to observe absorbance changes associated with only the  $\text{DCB}^{\bullet-}$ . Data at 390 nm, corresponding to the  $\text{Ir}(\text{ppy})_3$  absorbance, was used to monitor the formation and decay of  $\text{Ir}(\text{ppy})_3^+$ .

#### Recombination of $\text{DCB}^{\bullet-}$ and $\text{Ir}(\text{ppy})_3^+$

We performed flash-quench TA measurements in the absence of piperidine substrate to confirm the formation of  $\text{Ir}(\text{ppy})_3^+$  and  $\text{DCB}^{\bullet-}$  implicated by excited state quenching and also to monitor charge recombination between  $\text{Ir}(\text{ppy})_3^+$  and  $\text{DCB}^{\bullet-}$  (Figure S4). As seen in Figure S4A, immediately after 430 nm excitation, large absorption changes were seen at 346 nm and 380 nm, with another broad band at 600 nm. The intense positive  $\Delta\text{mOD}$  feature at 346 nm was consistent with the formation of  $\text{DCB}^{\bullet-}$  based on the reported intense absorption band at 346 nm. The negative  $\Delta\text{mOD}$  feature at 380 nm and the broad feature at 600 nm were consistent with the formation of  $\text{Ir}(\text{ppy})_3^+$  based on the spectroelectrochemistry data in Figure S3B. Because  $\text{Ir}(\text{ppy})_3^+$  is more absorbing between 350–400 nm, the oxidation of  $\text{Ir}(\text{ppy})_3$  to  $\text{Ir}(\text{ppy})_3^+$  was seen as a large negative  $\Delta\text{mOD}$  in Figure S4A. We also see the growth of the broad 600 nm band observed for  $\text{Ir}(\text{ppy})_3^+$ , where  $\text{Ir}(\text{ppy})_3$  shows no absorbance. These data further support the formation of  $\text{Ir}(\text{ppy})_3^+$  and  $\text{DCB}^{\bullet-}$  implicated by the excited state electron transfer from  $^*\text{Ir}(\text{ppy})_3$  to  $\text{DCB}$  shown in Figure S1. Charge recombination of  $\text{DCB}^{\bullet-}$  with  $\text{Ir}(\text{ppy})_3^+$  was measured in the absence of a piperidine substrate by monitoring the decay of  $\text{DCB}^{\bullet-}$  absorbance at 346 nm (Figure S4B). The kinetics were modelled to bimolecular kinetics of equal concentration reactants (eq S1).

$$[\text{DCB}^{\bullet-}]_t = \frac{[\text{DCB}^{\bullet-}]_i}{(1 + k_{\text{rec}}t[\text{DCB}^{\bullet-}]_i)} \quad (\text{eq S1})$$

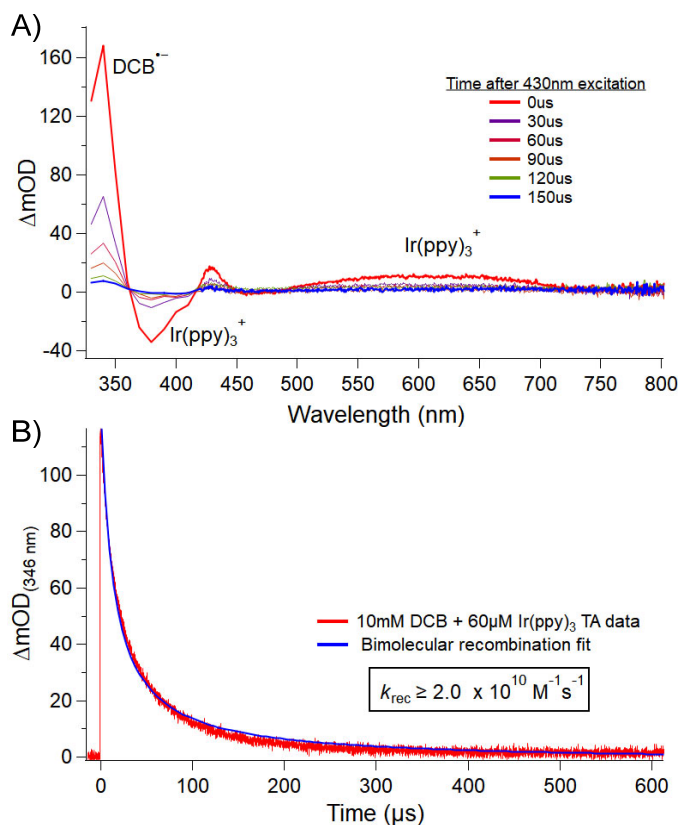

Figure S4: A) TA difference spectra collected with 10 mM DCB and 40  $\mu\text{M}$   $\text{Ir}(\text{ppy})_3$  different times after the 430 nm laser flash. Immediately after the laser flash we see the growth of signals consistent with  $\text{Ir}(\text{ppy})_3^+$  and  $\text{DCB}^{\bullet-}$  B) Single wavelength TA data collected at 346 nm with 10 mM of DCB and 40  $\mu\text{M}$   $\text{Ir}(\text{ppy})_3$  in DMA. At this concentration of DCB, the excited state lifetime is < 10 ns, which leads to rapid formation of  $\text{DCB}^{\bullet-}$  after the laser flash. The decay of this species was modeled as an equal-concentration

bimolecular recombination shown in eq S1, and the rate constant was estimated using the reported  $\epsilon_{346\text{nm}} = 34,000 \text{ M}^{-1} \text{ cm}^{-1}$  for  $\text{DCB}^{\bullet-}$  in water. This fit is shown in blue. The recombination of  $\text{DCB}^{\bullet-}$  and  $\text{Ir}(\text{ppy})_3^+$  formed from excited state electron transfer proceeds at or near diffusion limit.

#### Oxidation of reactant piperidine **1m** by $\text{Ir}(\text{ppy})_3^+$

As described above, excited state ET between DCB and  $\text{Ir}(\text{ppy})_3$  generates  $\text{Ir}(\text{ppy})_3^+$ .  $\text{Ir}(\text{ppy})_3^+$  is thermodynamically capable of oxidizing the reactant piperidine present in a large excess under the reaction conditions. To estimate the rate constant for reactant piperidine oxidation by photogenerated  $\text{Ir}(\text{ppy})_3^+$  ( $k_{\text{ox}}$ , eq S3), we monitored the return in absorbance at 390 nm as a function of increasing concentration of piperidine **1m**. As seen in Figure S5,  $\text{Ir}(\text{ppy})_3^+$  has a lower  $\epsilon_{390}$  than  $\text{Ir}(\text{ppy})_3$ , so forming  $\text{Ir}(\text{ppy})_3^+$  results in a large negative  $\Delta\text{OD}_{390}$  (Figure S7). The return of this absorbance corresponds to the reduction of  $\text{Ir}(\text{ppy})_3^+$  by **1m** (eq S3) or by recombination with  $\text{DCB}^{\bullet-}$  to reform  $\text{Ir}(\text{ppy})_3$  (eq S2). The absorbance return at 390 nm was modeled to a combination of bimolecular recombination between the  $\text{Ir}(\text{ppy})_3^+$  and  $\text{DCB}^{\bullet-}$  and pseudo-first-order ET between piperidine **1m** (eq S5).

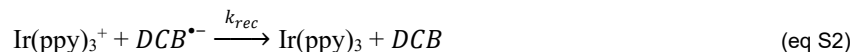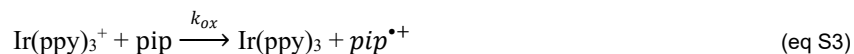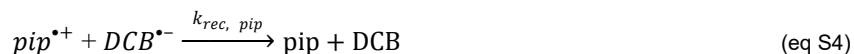

$$[\text{Ir}(\text{ppy})_3^+]_t = \left( \frac{[\text{Ir}(\text{ppy})_3^+]_i \exp(-k_{\text{obs}}t)}{1 + k_{\text{rec}}t[\text{DCB}^{\bullet-}]_i} \right) \quad (\text{eq S5})$$

where  $k_{\text{obs}}$  is the observed rate constant for **1m** oxidation by  $\text{Ir}(\text{ppy})_3^+$  under pseudo-first order conditions ( $[\text{1m}] \gg [\text{Ir}(\text{ppy})_3^+]$ ) and  $k_{\text{rec}}$  was fixed to the value obtained for the 390 nm and 346 nm data in the absence of **1m** (see Figure S4B).

Eq S5 was applied to only the initial *increased absorbance* after the laser flash for the TA data in Figure S5, as this should pertain to the reduction of  $\text{Ir}(\text{ppy})_3^+$  to  $\text{Ir}(\text{ppy})_3$  (an absorbance growth). The residual positive  $\Delta\text{mOD}$  was due to residual  $\text{DCB}^{\bullet-}$  absorbance at 390 nm, which did not recombine with  $\text{Ir}(\text{ppy})_3^+$  due to the competitive reaction with abundant **1m**. The decay of this positive  $\Delta\text{mOD}$  feature occurs on a similar timescale as the recombination in the absence of **1m**, suggesting that **1m**<sup>•+</sup> reacts with  $\text{DCB}^{\bullet-}$  ( $k_{\text{rec, pip}}$ , eq S4) with a similar rate constant to  $k_{\text{rec}}$ . The similarity of the rate constants for **1m**<sup>•+</sup> reacting with  $\text{DCB}^{\bullet-}$  and for  $\text{Ir}(\text{ppy})_3^+$  recombination with  $\text{DCB}^{\bullet-}$  is an inherent assumption in eq S5, where it is assumed throughout that  $[\text{Ir}(\text{ppy})_3^+]_t = [\text{DCB}^{\bullet-}]_t$ .

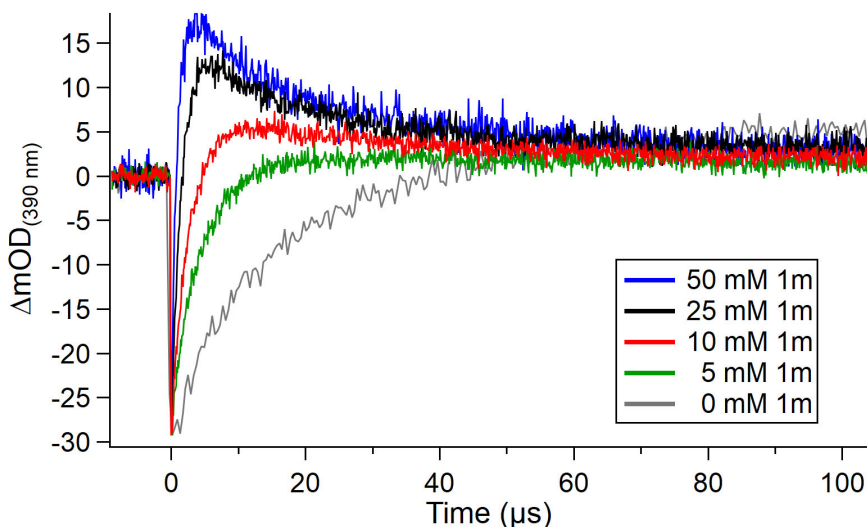

Figure S5: Transient absorption data collected at 390 nm with 10 mM of DCB, 40 of  $\mu\text{M}$   $\text{Ir}(\text{ppy})_3$ , and increasing concentrations of **1m**. The laser flash leads to rapid oxidation of the  $\text{Ir}(\text{ppy})_3$ , yielding a large negative absorbance change because the  $\text{Ir}(\text{ppy})_3^+$  species has a smaller  $\epsilon_{390}$  than  $\text{Ir}(\text{ppy})_3$ . **1m** oxidation by  $\text{Ir}(\text{ppy})_3^+$  is observed as a return in the absorbance at 390 nm as  $\text{Ir}(\text{ppy})_3^+$  is reduced to  $\text{Ir}(\text{ppy})_3$ . The fit of this absorbance return to eq S2 is shown as a solid line on the data traces.  $k_{\text{obs}}$  at each concentration of **1m** was obtained from the fits. We observe that the return in  $\text{Ir}(\text{ppy})_3$  absorbance is faster with larger concentrations of **1m**, and that a new positive absorbance can be observed at sufficiently high concentrations of **1m**. This is consistent with an intermolecular ET reaction between **1m** and the  $\text{Ir}(\text{ppy})_3^+$  generated in the laser flash (eq S3). The residual absorbance is due to leftover  $\text{DCB}^{\bullet-}$  which was not

able to recombine with  $\text{Ir}(\text{ppy})_3^+$  before it could be reduced by **1m**. The decay of what we assign as residual  $\text{DCB}^{\bullet-}$  absorbance matches well with the bimolecular recombination kinetics in Figure S7, suggesting perhaps that the reaction of  $\mathbf{1m}^+$  and  $\text{DCB}^{\bullet-}$  occurs with a similar rate constant (eq S4).

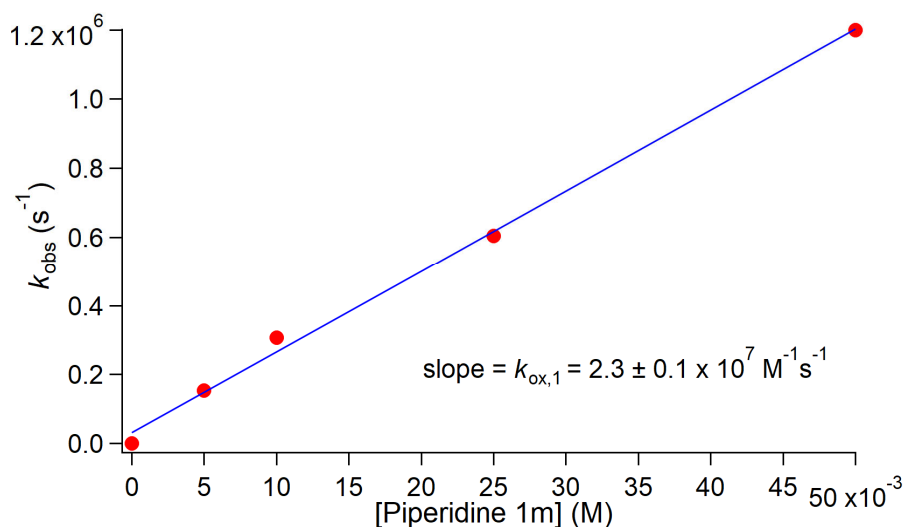

Figure S6: Observed rate constants for  $\text{Ir}(\text{ppy})_3^+$  reduction by **1m** at 390 nm obtained from the fits shown in Figure S5. The slope of the concentration dependence corresponds to the second order rate constant for **1m** oxidation with  $\text{Ir}(\text{ppy})_3^+$ .

#### Oxidation of arylated piperidines **2a-syn** and **2a-anti** with $\text{Ir}(\text{ppy})_3^+$

As described in the main text, the C-H arylated products were found to undergo a selective epimerization which yielded the observed distribution of diastereomers. One possibility we explored was that epimerization occurs more rapidly with one diastereomer than the other, leading to enrichment in the slower reacting diastereomer. To determine if the initial oxidation of the arylated piperidines kinetically controlled the observed  $dr$ , we measured the rate constants for oxidation of piperidine **2a-syn** ( $k_{\text{ox,syn}}$ ) and **2a-anti** ( $k_{\text{ox,anti}}$ ) in the same way as described above for **1m** oxidation. If the observed diastereoselectivity, 95:5  $\geq$  (**2a-syn**:**2a-anti**), was a result of the different rate constants for initial oxidation of the **2a** diastereomers, then  $k_{\text{ox,anti}}$  would need to be 19 times larger than  $k_{\text{ox,syn}}$ .

The rate constants for oxidizing the **2a** diastereomers are smaller than those reported above for piperidine **1m**, which is consistent with the addition of an electron withdrawing cyanobenzene group. As can be seen in Figure S9, the change in the 390 nm TA data with added piperidine **2a** (Figure S7) was much smaller than the changes seen in Figure S7. With the rate constants being much smaller, the accuracy of the fit in eq S5 suffered, as much of the absorbance growth after the laser flash at 390 nm was dominated by  $\text{Ir}(\text{ppy})_3^+$  recombination with  $\text{DCB}^{\bullet-}$  (eq S2).

Furthermore, the residual positive  $\Delta\text{mOD}$  at 390 nm, attributed to leftover  $\text{DCB}^{\bullet-}$  absorbance, does *not* decay appreciably with the **2a** diastereomers. We hypothesize that, unlike with  $\mathbf{1m}^+$  (see discussion above and Figures S5 and S6),  $k_{\text{rec,pip}}$  was not similar to the  $k_{\text{rec}}$  in the case of piperidine **2a** radical cation (eq S4). This causes deviation from the model in eq S5, as this model assumes that  $k_{\text{rec}} \approx k_{\text{rec,pip}}$ . We therefore attributed the non-zero y-intercepts in the  $k_{\text{obs}}$  versus [**2a**] plot in Figure S8 to deviations from the mass-balanced bimolecular recombination behavior assumed in eq S5 and insufficient accountancy for recombination in the kinetic fit. Still, Figure S8 shows that both diastereomers react with  $\text{Ir}(\text{ppy})_3^+$  with nearly indistinguishable rate constants. These results rule out that diastereoselectivity is controlled by initial oxidation of the arylated piperidines as the ratio of the rate constants ( $k_{\text{ox,anti}}/k_{\text{ox,syn}}$ ) would need to be greater than 20. Therefore, the below data does not support that the observed  $dr$  was kinetically controlled by initial arylated piperidine oxidation.

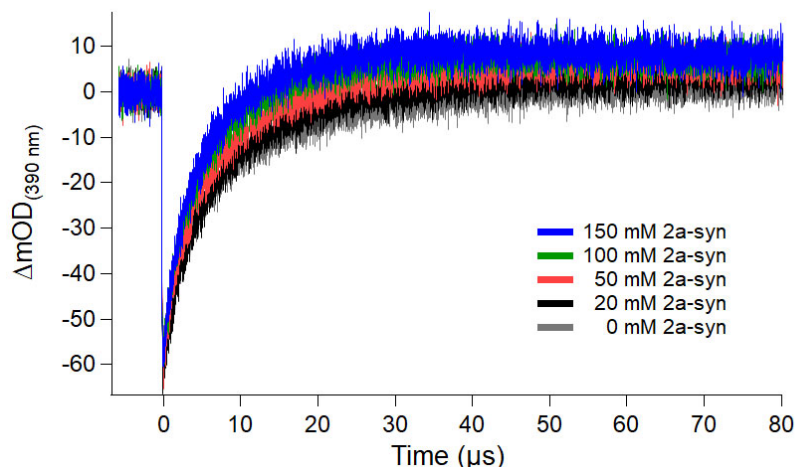

Figure S7: 390 nm transient absorption data for **2a-syn** oxidation by photogenerated  $\text{Ir(ppy)}_3^+$  as a function of increasing piperidine concentration. The return in absorbance was faster with added **2a-syn**, indicating faster  $\text{Ir(ppy)}_3^+$  decay in the presence of added piperidine and indicating **2a-syn** oxidation by  $\text{Ir(ppy)}_3^+$ . The TA data was fit to equation S5 as described for **1m** oxidation.

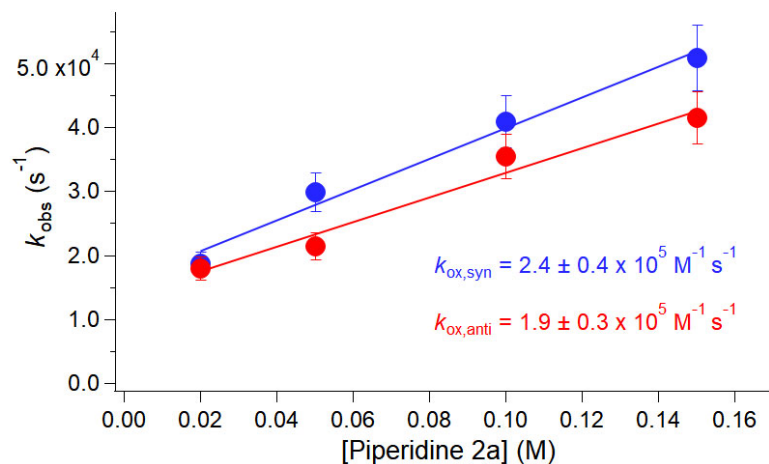

Figure S8: Plot of  $k_{\text{obs}}$  vs. **2a-syn** or **2a-anti** concentration when the data in Figure S9 was fit to eq S5. The slope of the dependence is the rate constant  $k_{\text{ox, syn}}$  for **2a-syn** (blue) and  $k_{\text{ox, anti}}$  for **2a-anti** (red).

### Quantum Yield Measurements

Quantum yield measurements were performed using the  $\text{Ru(bpy)}_3^{2+}$  endoperoxide actinometer standardized by Scaiano *et al*<sup>11</sup> in the same photoreactor and Kontes capped reaction vessels used for the arylation reaction. Samples were found to absorb  $3.4 \times 10^{-7}$  (mol hv)/sec in the photoreactor based on the consumption of diphenylanthracene absorption at 372 nm. Quantum yields for the piperidine  $\alpha$ -arylation varied between 0.6-0.4 from 2-8 minutes for piperidine **1a** based on product conversions given in Table S4 for piperidine **1a**.

## DFT Calculations

### I. Computational Methods

DFT calculations were performed using Gaussian 09.<sup>12</sup> Geometry optimizations and frequency calculations were performed at the  $\omega$ B97X-D/6-31G(d) level of theory<sup>13</sup> using the conductor-like polarizable continuum model (CPCM)<sup>14</sup> using *N,N*-dimethylacetamide ( $\epsilon = 37.8$ ) to incorporate solvation effects. A pruned (99,590) grid (requested by the keyword "int=ultrafine") was used in geometry optimizations to minimize orientational variations in calculated free energy corrections.<sup>15</sup> Thermal contributions to free energies were calculated from vibrational frequencies using the quasi-rigid rotor-harmonic oscillator (RRHO) approach of Grimme.<sup>16</sup> Optimized geometries were confirmed by frequency computations as minima or first-order saddle-point structures. Single-point energy calculations were computed at the  $\omega$ B97X-D/6-311+G(d,p), CPCM (*N,N*-dimethylacetamide) level of theory. Conformational searches were carried out in Spartan '16 using the MMFFs force field. Computed structures were visualized using CYLview.<sup>17</sup>

### II. Calculated Energies

| Structure      | E [ $\omega$ B97X-D/6-311+G(d,p), CPCM (DMA) // $\omega$ B97X-D/6-31G(d), CPCM (DMA)] | $\Delta$ G [ $\omega$ B97X-D/6-31G(d), CPCM (DMA)] | G (E + $\Delta$ G) |
|----------------|---------------------------------------------------------------------------------------|----------------------------------------------------|--------------------|
| <b>2a-syn</b>  | -1002.756731                                                                          | 0.417116                                           | -1002.339615       |
| <b>2a-anti</b> | -1002.756005                                                                          | 0.418444                                           | -1002.337561       |
| <b>2e-syn</b>  | -1002.754029                                                                          | 0.418651                                           | -1002.335378       |
| <b>2e-anti</b> | -1002.760037                                                                          | 0.417743                                           | -1002.342294       |
| <b>2m-syn</b>  | -845.507318                                                                           | 0.307919                                           | -845.199399        |
| <b>2m-anti</b> | -845.507066                                                                           | 0.308659                                           | -845.198407        |

Table S9. Computed energies in Hartrees.  $\Delta$ G values provided are corrected values after applying the quasi-rigid rotor-harmonic oscillator (RRHO) approach of Grimme.<sup>14</sup>

### III. Cartesian Coordinates of Calculated Structure

#### 2a-syn

|   |             |             |             |
|---|-------------|-------------|-------------|
| C | -0.07339900 | -0.67570200 | -0.88493200 |
| C | -0.77593000 | -2.03104400 | -0.73551900 |
| C | -2.27305900 | -1.93925200 | -1.02206600 |
| C | -2.90810200 | -0.83303000 | -0.15597500 |
| C | -2.17343500 | 0.49164200  | -0.44673100 |
| H | -0.30064000 | -2.74360600 | -1.42021700 |
| H | -0.10791800 | -0.40773200 | -1.95704400 |
| H | -2.38772500 | -1.61992900 | -2.06899200 |
| H | -3.93624000 | -0.70396900 | -0.51892200 |
| H | -2.24864100 | 0.66175900  | -1.54063300 |
| N | -0.74726000 | 0.35173500  | -0.07494200 |
| C | -0.02553200 | 1.59817900  | -0.07594000 |
| C | 0.32648000  | 2.16493500  | 1.14799000  |
| C | 0.33049100  | 2.25420600  | -1.25758500 |
| C | 1.02095700  | 3.37076900  | 1.19652400  |
| H | 0.04602800  | 1.64471300  | 2.05878300  |
| C | 1.02940100  | 3.45729900  | -1.21085700 |
| H | 0.05719000  | 1.82739200  | -2.21869400 |
| C | 1.37652700  | 4.01959200  | 0.01620400  |
| H | 1.28884800  | 3.80083600  | 2.15716700  |
| H | 1.30142000  | 3.95817600  | -2.13542100 |
| H | 1.92222100  | 4.95769600  | 0.05136300  |
| C | 1.37947200  | -0.81937900 | -0.48169000 |
| C | 2.38304500  | -0.86337200 | -1.44893300 |
| C | 1.72620700  | -0.95832000 | 0.86617600  |
| C | 3.71269400  | -1.04411000 | -1.08893200 |
| H | 2.12449200  | -0.74948500 | -2.49777100 |
| C | 3.04728500  | -1.13445000 | 1.24453600  |
| H | 0.94689700  | -0.91196300 | 1.62026000  |
| C | 4.04621400  | -1.17848400 | 0.26234700  |
| H | 4.48854300  | -1.07491600 | -1.84638900 |
| H | 3.31156400  | -1.23682100 | 2.29165800  |
| C | 5.41771200  | -1.35841800 | 0.64558700  |
| N | 6.52604200  | -1.50394200 | 0.95584800  |
| C | -2.81467800 | 1.71493200  | 0.22419800  |
| H | -2.30498300 | 2.61297100  | -0.13781100 |
| C | -4.30902200 | 1.85765700  | -0.06216300 |
| H | -4.67025700 | 2.82945700  | 0.28848600  |
| H | -4.51391700 | 1.79253600  | -1.13738000 |
| H | -4.90134700 | 1.08596100  | 0.43849600  |
| C | -2.97023800 | -1.17945200 | 1.34888400  |
| H | -2.69146900 | -0.30500300 | 1.94548700  |
| H | -2.22045900 | -1.94030100 | 1.59391300  |
| H | -2.64142300 | 1.68648800  | 1.30629800  |
| C | -4.34521800 | -1.67019200 | 1.80554600  |
| H | -4.33996100 | -1.92060300 | 2.87195500  |
| H | -5.10991700 | -0.90091400 | 1.64770000  |
| H | -4.65776300 | -2.56251600 | 1.25312100  |
| C | -2.95008700 | -3.30127900 | -0.87928700 |
| H | -4.02304100 | -3.23251500 | -1.09090000 |
| H | -2.51233200 | -4.02312800 | -1.57778300 |
| H | -2.82974000 | -3.70583700 | 0.13232600  |
| H | -0.60761800 | -2.40966100 | 0.28030900  |

#### 2a-anti

|   |             |             |             |
|---|-------------|-------------|-------------|
| C | -0.08513200 | -0.80251500 | 0.47090800  |
| C | -0.69875300 | -2.14688900 | 0.04143400  |
| C | -2.22766800 | -2.17754600 | 0.12323500  |
| C | -2.76876100 | -0.97777200 | -0.67785500 |
| C | -2.15256800 | 0.36572700  | -0.24229100 |

|   |             |             |             |
|---|-------------|-------------|-------------|
| H | -0.38983600 | -2.33799900 | -0.99386700 |
| H | -0.26524500 | -0.67255400 | 1.55231000  |
| H | -2.54961700 | -3.08609200 | -0.40146200 |
| H | -2.40208100 | -1.12778100 | -1.70482700 |
| H | -2.43960600 | 1.08273700  | -1.02059900 |
| N | -0.67283100 | 0.28073300  | -0.31799500 |
| C | -0.05078000 | 1.55860400  | -0.20591100 |
| C | 0.62827100  | 1.98875000  | 0.93820400  |
| C | -0.14106700 | 2.42915000  | -1.29888800 |
| C | 1.19666000  | 3.26030900  | 0.98614100  |
| H | 0.71354500  | 1.33721800  | 1.80161300  |
| C | 0.41131500  | 3.70248500  | -1.24240900 |
| H | -0.64885700 | 2.09017700  | -2.19759300 |
| C | 1.08656900  | 4.12586100  | -0.09752300 |
| H | 1.72129100  | 3.57525200  | 1.88364000  |
| H | 0.32813400  | 4.36198900  | -2.10144700 |
| H | 1.52740900  | 5.11709500  | -0.05537900 |
| C | 1.41419200  | -0.89152100 | 0.25874300  |
| C | 2.25428200  | -1.21197300 | 1.32579000  |
| C | 1.96548600  | -0.72749500 | -1.01566600 |
| C | 3.62150500  | -1.36302500 | 1.13674700  |
| H | 1.83543700  | -1.33984600 | 2.32011500  |
| C | 3.32854400  | -0.87017000 | -1.22204400 |
| H | 1.31433800  | -0.47330100 | -1.84561000 |
| C | 4.16167700  | -1.18878400 | -0.14165400 |
| H | 4.26862700  | -1.60807000 | 1.97203500  |
| H | 3.75196800  | -0.73625800 | -2.21176500 |
| C | 5.57476700  | -1.33411000 | -0.34673000 |
| N | 6.71689400  | -1.45158400 | -0.51285300 |
| C | -2.66111100 | 0.94000200  | 1.10930200  |
| H | -1.89209200 | 0.80571400  | 1.87955500  |
| C | -3.03774700 | 2.42046800  | 1.02610700  |
| H | -3.39394600 | 2.78975600  | 1.99377100  |
| H | -2.18390000 | 3.03401900  | 0.72181300  |
| H | -3.83870500 | 2.57312500  | 0.29304600  |
| C | -4.29861100 | -0.90186400 | -0.77231500 |
| H | -4.55980900 | -0.01572000 | -1.36613500 |
| H | -4.74609000 | -0.74503100 | 0.21577200  |
| H | -3.53241900 | 0.38036700  | 1.46022700  |
| C | -4.93278800 | -2.13768100 | -1.41094600 |
| H | -6.00622200 | -1.98737700 | -1.56448500 |
| H | -4.47962500 | -2.35446500 | -2.38544300 |
| H | -4.81139700 | -3.02531800 | -0.78082700 |
| C | -2.72396800 | -2.30274100 | 1.56793600  |
| H | -3.81781000 | -2.30202900 | 1.61965300  |
| H | -2.37320900 | -3.24780400 | 1.99709400  |
| H | -2.36049600 | -1.49589200 | 2.21101000  |
| H | -0.26411000 | -2.93956900 | 0.66182500  |

## 2e-syn

|   |             |             |             |
|---|-------------|-------------|-------------|
| C | -0.00043200 | -0.11495100 | 1.17893800  |
| C | -0.42025800 | 1.06581000  | 2.07778100  |
| C | -0.66212500 | 2.34782300  | 1.27601600  |
| C | -1.64791800 | 2.09562400  | 0.13136700  |
| C | -1.16041600 | 0.94739300  | -0.78487500 |
| H | -1.41006800 | 0.76584000  | 2.45192200  |
| H | -0.13828500 | -1.01486100 | 1.78323500  |
| H | -1.07197400 | 3.11377200  | 1.94687000  |
| H | 0.27456300  | 2.76057600  | 0.88022100  |
| H | -2.58156700 | 1.72886200  | 0.58652900  |
| H | -2.00098900 | 0.68325000  | -1.43213500 |
| N | -0.89154400 | -0.25947800 | 0.02221300  |
| C | -1.87147800 | -1.26807300 | 0.03637100  |



|   |             |             |             |
|---|-------------|-------------|-------------|
| C | -2.36466000 | -1.76932900 | -1.18224600 |
| C | -2.38145900 | -1.82502200 | 1.22107800  |
| C | -3.32854200 | -2.76894100 | -1.21171600 |
| H | -1.96494400 | -1.38545500 | -2.11518400 |
| C | -3.33117200 | -2.84289600 | 1.18287400  |
| H | -2.05829300 | -1.45475200 | 2.18840300  |
| C | -3.81880800 | -3.32086800 | -0.02918900 |
| H | -3.68311700 | -3.13380900 | -2.17169200 |
| H | -3.70408600 | -3.24970100 | 2.11876300  |
| H | -4.56431100 | -4.10941900 | -0.05369900 |
| C | 1.45997300  | -0.22100400 | 0.72205500  |
| C | 1.87395800  | -1.48229000 | 0.27324900  |
| C | 2.38946400  | 0.82010100  | 0.70419600  |
| C | 3.16026100  | -1.70488800 | -0.18808300 |
| H | 1.16271900  | -2.30370200 | 0.27669400  |
| C | 3.68593200  | 0.61966800  | 0.24382000  |
| H | 2.11494800  | 1.81398300  | 1.03387500  |
| C | 4.07504900  | -0.64429400 | -0.20508100 |
| H | 3.46005200  | -2.68871100 | -0.53252900 |
| H | 4.39194400  | 1.44298100  | 0.23056900  |
| C | 5.41196600  | -0.85683200 | -0.68191600 |
| N | 6.49211700  | -1.02924000 | -1.06816100 |
| C | -0.00068600 | 1.33435000  | -1.71565900 |
| H | 0.85952500  | 1.68841700  | -1.14060500 |
| C | 0.42942500  | 0.20457900  | -2.64639700 |
| H | 1.27940600  | 0.51131300  | -3.26458400 |
| H | 0.72172000  | -0.68337600 | -2.07839400 |
| H | -0.38735100 | -0.07857500 | -3.32125300 |
| C | -1.98704800 | 3.39321400  | -0.61223800 |
| H | -1.07154800 | 3.84184000  | -1.01891100 |
| H | -2.36879800 | 4.10833700  | 0.12782600  |
| C | 0.46384000  | 1.25914900  | 3.31076600  |
| H | -0.02061300 | 1.94992200  | 4.00899300  |
| H | 0.61864300  | 0.30796100  | 3.83308700  |
| H | 1.44802600  | 1.67061300  | 3.07158400  |
| H | -0.32902300 | 2.18617600  | -2.32187100 |
| C | -3.02394700 | 3.22896100  | -1.72367500 |
| H | -3.93008900 | 2.74314800  | -1.34292500 |
| H | -3.31154300 | 4.20169000  | -2.13526600 |
| H | -2.64446500 | 2.62100900  | -2.55250500 |

## 2e-anti

|   |             |             |             |
|---|-------------|-------------|-------------|
| C | -0.06287900 | -0.92161400 | 0.52179700  |
| C | -0.49782400 | -2.35394500 | 0.12438700  |
| C | -2.01696600 | -2.50044400 | 0.18799800  |
| C | -2.70764600 | -1.43212500 | -0.65379000 |
| C | -2.30142400 | -0.03962200 | -0.14698900 |
| H | -0.19369800 | -2.50055900 | -0.92149400 |
| H | -0.21926900 | -0.83206400 | 1.61239800  |
| H | -2.29746700 | -3.50093800 | -0.16485900 |
| H | -2.35352700 | -2.43048000 | 1.23324500  |
| H | -2.30819700 | -1.50287200 | -1.67643800 |
| H | -2.68776600 | 0.69197500  | -0.86409800 |
| N | -0.82545500 | 0.08161800  | -0.22827500 |
| C | -0.38469500 | 1.43163200  | -0.09734700 |
| C | 0.23672800  | 1.93273700  | 1.05091700  |
| C | -0.60457800 | 2.30027100  | -1.17296900 |
| C | 0.62259600  | 3.26989800  | 1.11939900  |
| H | 0.41394200  | 1.28589400  | 1.90359300  |
| C | -0.23479600 | 3.63727300  | -1.09603100 |
| H | -1.06676300 | 1.90929900  | -2.07520000 |
| C | 0.38436000  | 4.13059300  | 0.05231300  |
| H | 1.10442500  | 3.63939400  | 2.02012100  |
| H | -0.41656700 | 4.29363900  | -1.94217000 |

|   |             |             |             |
|---|-------------|-------------|-------------|
| H | 0.68312000  | 5.17272200  | 0.11027800  |
| C | 1.42106500  | -0.76026300 | 0.24440500  |
| C | 2.35317100  | -0.82325100 | 1.28068300  |
| C | 1.87482800  | -0.59811300 | -1.06789800 |
| C | 3.71434100  | -0.72815000 | 1.02336100  |
| H | 2.01089200  | -0.94560900 | 2.30445500  |
| C | 3.22924000  | -0.49758500 | -1.34378500 |
| H | 1.15060100  | -0.53519300 | -1.87364400 |
| C | 4.15449700  | -0.56310100 | -0.29387300 |
| H | 4.43212800  | -0.77594300 | 1.83513900  |
| H | 3.57497300  | -0.36787400 | -2.36375600 |
| C | 5.55887600  | -0.45746300 | -0.57097100 |
| N | 6.69381400  | -0.37214900 | -0.79547600 |
| C | -2.87188500 | 0.32267600  | 1.24915700  |
| H | -2.10868800 | 0.14924500  | 2.01684700  |
| C | -3.37040700 | 1.76613200  | 1.34948100  |
| H | -3.77917900 | 1.96960500  | 2.34501500  |
| H | -2.56617300 | 2.48344500  | 1.16081200  |
| H | -4.16489300 | 1.95528800  | 0.61798700  |
| C | -4.22108000 | -1.66448200 | -0.73920000 |
| H | -4.64969500 | -1.75417200 | 0.26715500  |
| H | -4.37321900 | -2.64188600 | -1.21462500 |
| C | 0.19157800  | -3.40938100 | 0.98891000  |
| H | -0.15882400 | -4.40887400 | 0.71119300  |
| H | 1.27941800  | -3.39041900 | 0.87414700  |
| H | -0.04006300 | -3.25588900 | 2.05015700  |
| H | -3.69924700 | -0.34911200 | 1.50188000  |
| C | -4.98332100 | -0.59965700 | -1.52723600 |
| H | -6.02713900 | -0.89567900 | -1.67263600 |
| H | -4.98473000 | 0.36540200  | -1.00918900 |
| H | -4.53558000 | -0.44670600 | -2.51636500 |

## 2m-syn

|   |             |             |             |
|---|-------------|-------------|-------------|
| C | 0.68281400  | -1.19532900 | 0.54810900  |
| C | 0.99901500  | -2.65410900 | 0.18962900  |
| C | 2.48105500  | -2.95452100 | 0.37865700  |
| C | 3.30754200  | -1.95775600 | -0.42598400 |
| C | 2.96460800  | -0.51166500 | -0.06335700 |
| H | 0.37884300  | -3.30841200 | 0.81206800  |
| H | 0.88607600  | -1.07328300 | 1.62778900  |
| H | 2.73971800  | -2.87273300 | 1.44320500  |
| H | 4.37836300  | -2.11682400 | -0.25627500 |
| H | 3.23306700  | -0.35739700 | 0.99995700  |
| N | 1.51524100  | -0.27522800 | -0.24704800 |
| C | 1.15436500  | 1.10308900  | -0.02582200 |
| C | 1.17417200  | 1.68179600  | 1.24611100  |
| C | 0.77647000  | 1.88035300  | -1.11971300 |
| C | 0.81433200  | 3.01582400  | 1.41793300  |
| H | 1.47173700  | 1.08967900  | 2.10732200  |
| C | 0.42060800  | 3.21583900  | -0.95018600 |
| H | 0.76573600  | 1.42109900  | -2.10331300 |
| C | 0.43601900  | 3.78678500  | 0.32043800  |
| H | 0.83087900  | 3.45432000  | 2.41146000  |
| H | 0.12706700  | 3.80925200  | -1.81112400 |
| H | 0.15462800  | 4.82681500  | 0.45546000  |
| C | -0.78936100 | -0.92380800 | 0.31506000  |
| C | -1.66671800 | -0.80242500 | 1.39234800  |
| C | -1.29405300 | -0.83655500 | -0.98640100 |
| C | -3.02560200 | -0.59940700 | 1.18632900  |
| H | -1.28355800 | -0.86129800 | 2.40698100  |
| C | -2.64551600 | -0.63026000 | -1.21151300 |
| H | -0.61087300 | -0.91692600 | -1.82576000 |
| C | -3.51652500 | -0.51172900 | -0.11999800 |

|   |             |             |             |
|---|-------------|-------------|-------------|
| H | -3.70164600 | -0.50322800 | 2.02911200  |
| H | -3.03112800 | -0.55907400 | -2.22293400 |
| C | -4.91773400 | -0.29555100 | -0.34434700 |
| N | -6.05010900 | -0.12108800 | -0.52623600 |
| C | 3.78763800  | 0.45371600  | -0.91206300 |
| H | 3.50105300  | 0.37020000  | -1.96644900 |
| H | 4.84982700  | 0.20543700  | -0.82072700 |
| H | 0.71561000  | -2.82931000 | -0.85596400 |
| H | 3.65511400  | 1.49325900  | -0.60190100 |
| H | 3.12006000  | -2.10134700 | -1.49876600 |
| H | 2.70471200  | -3.98174400 | 0.07146400  |

## 2m-anti

|   |             |             |             |
|---|-------------|-------------|-------------|
| C | -0.64398200 | -1.18923700 | 0.41585200  |
| C | -0.88165200 | -2.62170900 | -0.09973100 |
| C | -2.35648200 | -3.00856400 | -0.08253100 |
| C | -3.15725500 | -1.97243600 | -0.86706300 |
| C | -2.92903700 | -0.55791100 | -0.32949500 |
| H | -0.50271300 | -2.68181300 | -1.12810000 |
| H | -0.87247600 | -1.18244400 | 1.49591000  |
| H | -2.48614500 | -4.00358500 | -0.52133700 |
| H | -2.84543400 | -2.00016000 | -1.91856200 |
| H | -3.38590100 | 0.14196700  | -1.03634800 |
| N | -1.48016800 | -0.24324500 | -0.32756500 |
| C | -1.22238100 | 1.14163900  | -0.11389400 |
| C | -0.68267000 | 1.65347400  | 1.07122300  |
| C | -1.52846100 | 2.03462400  | -1.14855400 |
| C | -0.44586900 | 3.01989600  | 1.20887300  |
| H | -0.44465700 | 0.98975500  | 1.89569700  |
| C | -1.30945700 | 3.39892100  | -1.00140100 |
| H | -1.92640800 | 1.64153300  | -2.08000900 |
| C | -0.76086900 | 3.90038700  | 0.17868000  |
| H | -0.02031500 | 3.39504400  | 2.13523400  |
| H | -1.55184600 | 4.07157200  | -1.81908500 |
| H | -0.57760800 | 4.96462200  | 0.29032400  |
| C | 0.82993900  | -0.87283100 | 0.24484800  |
| C | 1.71001700  | -1.03279000 | 1.31572200  |
| C | 1.33638600  | -0.48996600 | -1.00084000 |
| C | 3.07198900  | -0.81289400 | 1.15828700  |
| H | 1.32579600  | -1.32740300 | 2.28838400  |
| C | 2.69230900  | -0.26243700 | -1.17529800 |
| H | 0.65184900  | -0.35911600 | -1.83252200 |
| C | 3.56526800  | -0.42395700 | -0.09142400 |
| H | 3.74945200  | -0.93499900 | 1.99653400  |
| H | 3.07940300  | 0.03963400  | -2.14261600 |
| C | 4.97034200  | -0.18693000 | -0.26363700 |
| N | 6.10597100  | 0.00451000  | -0.40338500 |
| C | -3.59572700 | -0.33261200 | 1.03525500  |
| H | -3.19466000 | -0.99467900 | 1.80927300  |
| H | -4.67214500 | -0.51874500 | 0.96070900  |
| H | -0.28478100 | -3.30967900 | 0.50881300  |
| H | -3.45118600 | 0.69953300  | 1.36940000  |
| H | -4.22893300 | -2.19758800 | -0.83629000 |
| H | -2.71636200 | -3.07029600 | 0.95200700  |

## **X-Ray Crystallographic Data**

### ***Product 2a***

#### **Crystal Growth**

**2a** (10 mg) and picrylsulfonic acid dihydrate (0.9 equiv) were dissolved in a mixture of ethyl acetate (0.5 mL) and methanol (dropwise addition until complete dissolution occurred). The solution was transferred to an NMR tube and layered with hexanes (1.0 mL). Single crystals suitable for X-ray diffraction grew at room temperature over 3-5 days.

#### **Experimental**

Low-temperature diffraction data ( $\omega$ -scans) were collected on a Rigaku MicroMax-007HF diffractometer coupled to a Saturn994+ CCD detector with Cu K $\alpha$  ( $\lambda = 1.54178 \text{ \AA}$ ) for the structure of 007c-19018. The diffraction images were processed and scaled using Rigaku Oxford Diffraction software (CrysAlisPro; Rigaku OD: The Woodlands, TX, 2015). This data was refined as a 2-component twin. The fractional volume contribution of the minor twin component was freely refined to a converged value of 0.3543(10). The structure was solved with SHELXT and was refined against  $F^2$  on all data by full-matrix least squares with SHELXL (Sheldrick, G. M. Acta Cryst. 2008, A64, 112–122). All non-hydrogen atoms were refined anisotropically. Hydrogen atoms were included in the model at geometrically calculated positions and refined using a riding model. The isotropic displacement parameters of all hydrogen atoms were fixed to 1.2 times the U value of the atoms to which they are linked (1.5 times for methyl groups). The program SQUEEZE was used to compensate for the contribution of disordered solvents contained in voids within the crystal lattice from the diffraction intensities. This procedure was applied to the data file and the submitted model is based on the solvent removed data. Based on the total electron density found in the voids (201 e/ $\text{\AA}^3$ ), it is likely that ~4 ethyl acetate molecules are present in the unit cell. See "\_platon\_squeeze\_details" in this .cif for more information. The full numbering scheme of compound 007c-19018 can be found in the full details of the X-ray structure determination (CIF), which is included as Supporting Information. CCDC number 1968320 (007c-19018) contains the supplementary crystallographic data for this paper. These data can be obtained free of charge from The Cambridge Crystallographic Data Center via [www.ccdc.cam.ac.uk/data\\_request/cif](http://www.ccdc.cam.ac.uk/data_request/cif).

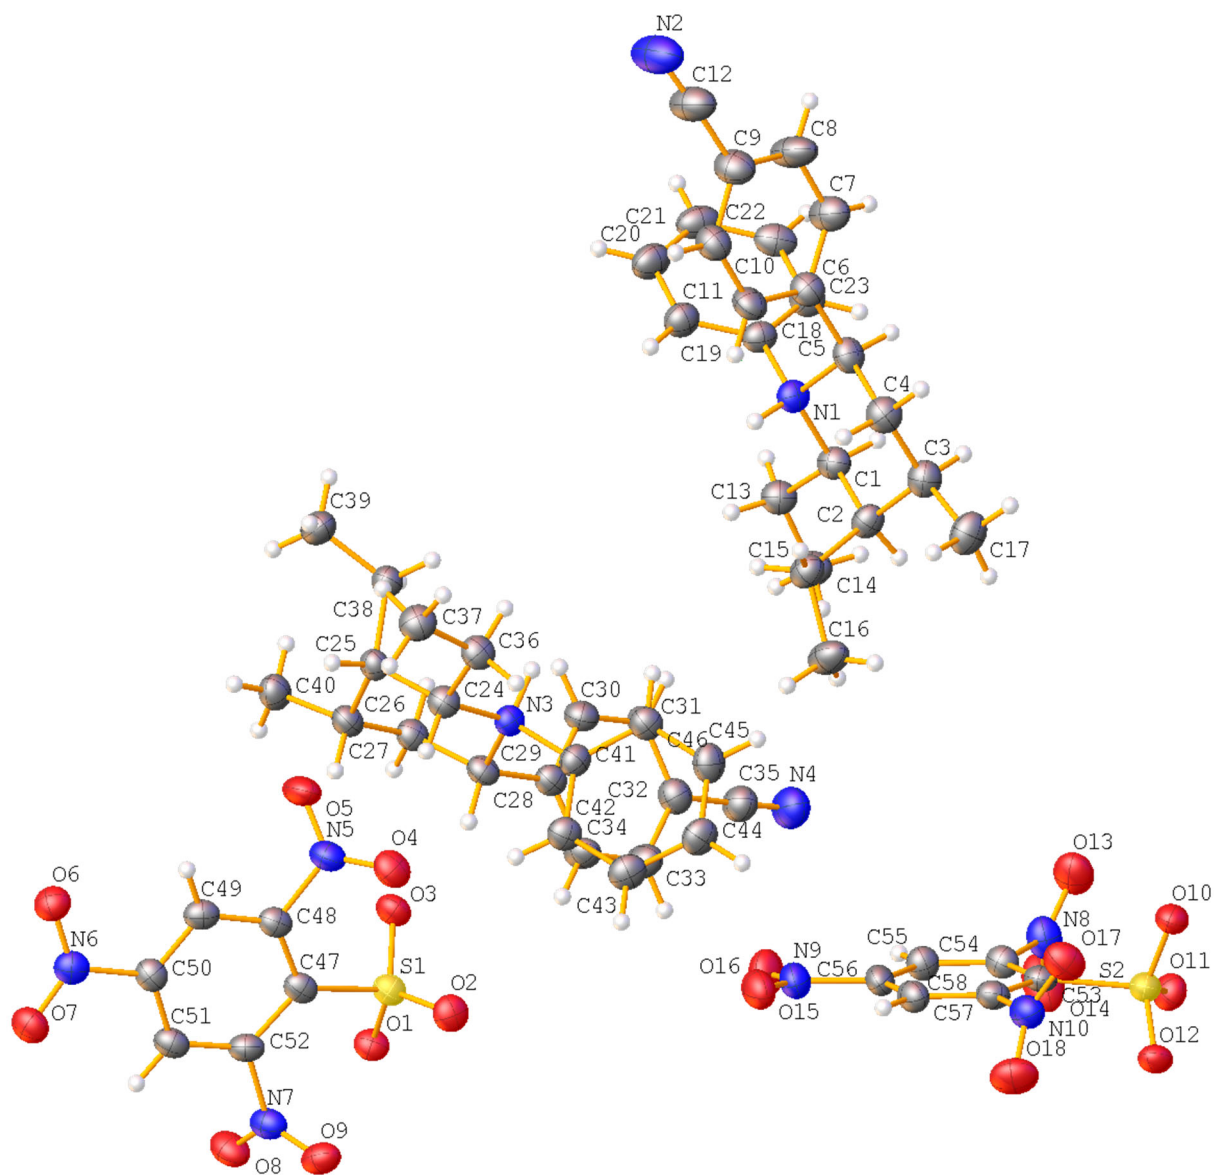

Figure S9. The complete numbering scheme of 007b-19018 with 50% thermal ellipsoid probability levels. The hydrogen atoms are shown as circles for clarity.

Table S10. Crystal data and structure refinement for 007b-19018.

|                      |                                                                 |          |
|----------------------|-----------------------------------------------------------------|----------|
| Identification code  | 007b-19018                                                      |          |
| Empirical formula    | C <sub>29</sub> H <sub>31</sub> N <sub>5</sub> O <sub>9</sub> S |          |
| Formula weight       | 625.65                                                          |          |
| Temperature          | 93(2) K                                                         |          |
| Wavelength           | 1.54184 Å                                                       |          |
| Crystal system       | Monoclinic                                                      |          |
| Space group          | P2 <sub>1</sub> /n                                              |          |
| Unit cell dimensions | a = 8.2796(3) Å                                                 | α = 90°. |

|                                      |                                       |                 |
|--------------------------------------|---------------------------------------|-----------------|
|                                      | b = 32.4638(7) Å                      | β = 98.611(3)°. |
|                                      | c = 24.8002(7) Å                      | γ = 90°.        |
| Volume                               | 6590.8(3) Å <sup>3</sup>              |                 |
| Z                                    | 8                                     |                 |
| Density (calculated)                 | 1.261 Mg/m <sup>3</sup>               |                 |
| Absorption coefficient               | 1.359 mm <sup>-1</sup>                |                 |
| F(000)                               | 2624                                  |                 |
| Crystal size                         | 0.200 x 0.200 x 0.100 mm <sup>3</sup> |                 |
| Crystal color and habit              | Colorless Block                       |                 |
| Diffractometer                       | Rigaku Saturn 944+ CCD                |                 |
| Theta range for data collection      | 2.258 to 67.132°.                     |                 |
| Index ranges                         | -9<=h<=9, -38<=k<=38, -29<=l<=29      |                 |
| Reflections collected                | 22919                                 |                 |
| Independent reflections              | 22919 [R(int) = 0.1726]               |                 |
| Observed reflections (I > 2sigma(I)) | 16141                                 |                 |
| Completeness to theta = 67.132°      | 99.5 %                                |                 |
| Absorption correction                | Semi-empirical from equivalents       |                 |
| Max. and min. transmission           | 1.00000 and 0.92914                   |                 |
| Solution method                      | SHELXT-2014/5 (Sheldrick, 2014)       |                 |
| Refinement method                    | SHELXL-2014/7 (Sheldrick, 2014)       |                 |
| Data / restraints / parameters       | 22919 / 0 / 808                       |                 |
| Goodness-of-fit on F <sup>2</sup>    | 1.032                                 |                 |
| Final R indices [I>2sigma(I)]        | R1 = 0.0659, wR2 = 0.1666             |                 |
| R indices (all data)                 | R1 = 0.1007, wR2 = 0.1839             |                 |
| Largest diff. peak and hole          | 0.398 and -0.537 e.Å <sup>-3</sup>    |                 |

Table S11. Atomic coordinates ( $\times 10^4$ ) and equivalent isotropic displacement parameters ( $\text{Å}^2 \times 10^3$ ) for 007b-19018.  $U(\text{eq})$  is defined as one third of the trace of the orthogonalized  $U_{ij}$  tensor.

|      | x       | y       | z       | U(eq) |
|------|---------|---------|---------|-------|
| S(1) | 7926(1) | 9716(1) | 5977(1) | 31(1) |
| O(1) | 6879(3) | 9997(1) | 6216(1) | 32(1) |
| O(2) | 9619(3) | 9735(1) | 6208(1) | 38(1) |
| O(3) | 7253(3) | 9304(1) | 5896(1) | 36(1) |

|       |          |          |          |       |
|-------|----------|----------|----------|-------|
| O(4)  | 9806(4)  | 9169(1)  | 5238(1)  | 41(1) |
| O(5)  | 7757(4)  | 8941(1)  | 4672(1)  | 48(1) |
| O(6)  | 6372(4)  | 10005(1) | 3267(1)  | 40(1) |
| O(7)  | 6054(4)  | 10636(1) | 3531(1)  | 41(1) |
| O(8)  | 5927(4)  | 10791(1) | 5579(1)  | 44(1) |
| O(9)  | 8533(4)  | 10700(1) | 5825(1)  | 42(1) |
| N(5)  | 8535(5)  | 9218(1)  | 4929(2)  | 36(1) |
| N(6)  | 6406(4)  | 10273(1) | 3618(1)  | 34(1) |
| N(7)  | 7225(5)  | 10616(1) | 5551(2)  | 36(1) |
| C(47) | 7780(5)  | 9899(1)  | 5275(2)  | 30(1) |
| C(48) | 7906(5)  | 9640(1)  | 4836(2)  | 31(1) |
| C(49) | 7475(5)  | 9755(1)  | 4297(2)  | 32(1) |
| C(50) | 6902(5)  | 10145(1) | 4192(2)  | 31(1) |
| C(51) | 6759(5)  | 10426(1) | 4599(2)  | 33(1) |
| C(52) | 7240(5)  | 10296(1) | 5128(2)  | 32(1) |
| S(2)  | 11301(1) | 8116(1)  | 11462(1) | 33(1) |
| O(10) | 12086(3) | 7746(1)  | 11309(1) | 36(1) |
| O(11) | 10291(4) | 8061(1)  | 11883(1) | 40(1) |
| O(12) | 12388(3) | 8469(1)  | 11551(1) | 36(1) |
| O(13) | 7619(4)  | 7633(1)  | 11267(2) | 55(1) |
| O(14) | 6670(5)  | 8208(1)  | 11550(2) | 69(1) |
| O(15) | 7155(4)  | 8880(1)  | 9149(1)  | 49(1) |
| O(16) | 5103(4)  | 8733(1)  | 9575(2)  | 56(1) |
| O(17) | 12975(4) | 8210(1)  | 10381(2) | 49(1) |
| O(18) | 12661(4) | 8871(1)  | 10396(2) | 56(1) |
| N(8)  | 7448(5)  | 8005(1)  | 11263(2) | 45(1) |
| N(9)  | 6552(5)  | 8742(1)  | 9541(2)  | 42(1) |
| N(10) | 12152(5) | 8518(1)  | 10403(2) | 40(1) |
| C(53) | 9879(5)  | 8272(1)  | 10869(2) | 32(1) |
| C(54) | 8193(5)  | 8234(1)  | 10843(2) | 33(1) |
| C(55) | 7083(5)  | 8389(1)  | 10423(2) | 36(1) |
| C(56) | 7708(5)  | 8581(1)  | 10001(2) | 34(1) |
| C(57) | 9349(5)  | 8626(1)  | 9991(2)  | 36(1) |
| C(58) | 10393(5) | 8468(1)  | 10426(2) | 34(1) |
| N(1)  | 7525(4)  | 5935(1)  | 7493(1)  | 32(1) |

|       |          |         |         |       |
|-------|----------|---------|---------|-------|
| N(2)  | 8638(7)  | 4605(2) | 5083(2) | 71(1) |
| C(1)  | 7524(5)  | 6169(1) | 8035(2) | 34(1) |
| C(2)  | 9097(5)  | 6415(1) | 8177(2) | 33(1) |
| C(3)  | 10545(5) | 6120(2) | 8214(2) | 39(1) |
| C(4)  | 10568(5) | 5899(2) | 7677(2) | 40(1) |
| C(5)  | 9028(5)  | 5651(1) | 7513(2) | 35(1) |
| C(6)  | 8974(5)  | 5420(1) | 6979(2) | 36(1) |
| C(7)  | 8741(6)  | 4999(2) | 6970(2) | 47(1) |
| C(8)  | 8725(7)  | 4778(2) | 6489(2) | 56(1) |
| C(9)  | 8921(6)  | 4988(2) | 6010(2) | 47(1) |
| C(10) | 9199(5)  | 5408(1) | 6020(2) | 40(1) |
| C(11) | 9215(5)  | 5624(1) | 6503(2) | 38(1) |
| C(12) | 8794(7)  | 4770(2) | 5497(2) | 56(1) |
| C(13) | 5973(5)  | 6420(1) | 8008(2) | 38(1) |
| C(14) | 5939(6)  | 6689(2) | 8512(2) | 42(1) |
| C(15) | 9230(6)  | 6795(1) | 7811(2) | 38(1) |
| C(16) | 9894(6)  | 7182(2) | 8125(2) | 48(1) |
| C(17) | 12181(5) | 6328(2) | 8412(2) | 47(1) |
| C(18) | 6009(5)  | 5684(1) | 7337(2) | 34(1) |
| C(19) | 5103(5)  | 5752(2) | 6831(2) | 39(1) |
| C(20) | 3745(6)  | 5503(2) | 6671(2) | 46(1) |
| C(21) | 3334(6)  | 5200(2) | 7016(2) | 45(1) |
| C(22) | 4260(5)  | 5138(1) | 7519(2) | 40(1) |
| C(23) | 5615(5)  | 5385(1) | 7687(2) | 38(1) |
| N(3)  | 7573(4)  | 8136(1) | 6185(1) | 28(1) |
| N(4)  | 6028(5)  | 7901(1) | 9071(2) | 54(1) |
| C(24) | 7659(5)  | 8193(1) | 5571(2) | 32(1) |
| C(25) | 5954(5)  | 8125(1) | 5232(2) | 30(1) |
| C(26) | 4736(5)  | 8427(1) | 5437(2) | 33(1) |
| C(27) | 4621(5)  | 8348(1) | 6032(2) | 32(1) |
| C(28) | 6261(5)  | 8405(1) | 6390(2) | 31(1) |
| C(29) | 6217(5)  | 8301(1) | 6983(2) | 31(1) |
| C(30) | 5746(5)  | 7910(1) | 7128(2) | 35(1) |
| C(31) | 5731(5)  | 7805(1) | 7666(2) | 36(1) |
| C(32) | 6145(5)  | 8102(1) | 8063(2) | 38(1) |



|       |          |         |         |       |
|-------|----------|---------|---------|-------|
| C(33) | 6589(6)  | 8499(2) | 7923(2) | 46(1) |
| C(34) | 6639(5)  | 8595(1) | 7386(2) | 39(1) |
| C(35) | 6092(6)  | 7995(2) | 8629(2) | 43(1) |
| C(36) | 9007(5)  | 7910(1) | 5422(2) | 36(1) |
| C(37) | 9107(6)  | 7902(2) | 4815(2) | 41(1) |
| C(38) | 5376(5)  | 7676(1) | 5192(2) | 33(1) |
| C(39) | 4581(6)  | 7551(2) | 4621(2) | 46(1) |
| C(40) | 3034(5)  | 8406(2) | 5095(2) | 39(1) |
| C(41) | 9170(5)  | 8224(1) | 6522(2) | 31(1) |
| C(42) | 9802(5)  | 8618(1) | 6538(2) | 34(1) |
| C(43) | 11232(5) | 8700(2) | 6883(2) | 39(1) |
| C(44) | 12031(5) | 8388(2) | 7201(2) | 39(1) |
| C(45) | 11414(5) | 7995(2) | 7169(2) | 40(1) |
| C(46) | 9957(5)  | 7906(1) | 6828(2) | 34(1) |

---

Table S12. Bond lengths [Å] and angles [°] for 007b-19018.

|             |          |
|-------------|----------|
| S(1)-O(2)   | 1.434(3) |
| S(1)-O(1)   | 1.446(3) |
| S(1)-O(3)   | 1.450(3) |
| S(1)-C(47)  | 1.827(4) |
| O(4)-N(5)   | 1.215(5) |
| O(5)-N(5)   | 1.228(5) |
| O(6)-N(6)   | 1.230(5) |
| O(7)-N(6)   | 1.223(5) |
| O(8)-N(7)   | 1.226(5) |
| O(9)-N(7)   | 1.221(5) |
| N(5)-C(48)  | 1.471(5) |
| N(6)-C(50)  | 1.481(5) |
| N(7)-C(52)  | 1.478(5) |
| C(47)-C(52) | 1.393(6) |
| C(47)-C(48) | 1.394(6) |
| C(48)-C(49) | 1.382(6) |

|             |          |
|-------------|----------|
| C(49)-C(50) | 1.364(6) |
| C(49)-H(49) | 0.9500   |
| C(50)-C(51) | 1.379(6) |
| C(51)-C(52) | 1.380(6) |
| C(51)-H(51) | 0.9500   |
| S(2)-O(11)  | 1.443(3) |
| S(2)-O(10)  | 1.445(3) |
| S(2)-O(12)  | 1.452(3) |
| S(2)-C(53)  | 1.814(4) |
| O(13)-N(8)  | 1.218(6) |
| O(14)-N(8)  | 1.222(6) |
| O(15)-N(9)  | 1.241(5) |
| O(16)-N(9)  | 1.215(5) |
| O(17)-N(10) | 1.214(5) |
| O(18)-N(10) | 1.224(5) |
| N(8)-C(54)  | 1.485(6) |
| N(9)-C(56)  | 1.470(6) |
| N(10)-C(58) | 1.475(6) |
| C(53)-C(58) | 1.390(6) |
| C(53)-C(54) | 1.393(6) |
| C(54)-C(55) | 1.377(6) |
| C(55)-C(56) | 1.384(6) |
| C(55)-H(55) | 0.9500   |
| C(56)-C(57) | 1.370(6) |
| C(57)-C(58) | 1.377(6) |
| C(57)-H(57) | 0.9500   |
| N(1)-C(18)  | 1.497(5) |
| N(1)-C(1)   | 1.543(5) |
| N(1)-C(5)   | 1.544(5) |
| N(1)-H(1)   | 0.93(6)  |
| N(2)-C(12)  | 1.148(7) |
| C(1)-C(13)  | 1.515(6) |
| C(1)-C(2)   | 1.524(6) |
| C(1)-H(1A)  | 1.0000   |
| C(2)-C(3)   | 1.527(6) |

|              |          |
|--------------|----------|
| C(2)-C(15)   | 1.547(6) |
| C(2)-H(2)    | 1.0000   |
| C(3)-C(4)    | 1.515(6) |
| C(3)-C(17)   | 1.527(7) |
| C(3)-H(3)    | 1.0000   |
| C(4)-C(5)    | 1.511(6) |
| C(4)-H(4A)   | 0.9900   |
| C(4)-H(4B)   | 0.9900   |
| C(5)-C(6)    | 1.516(6) |
| C(5)-H(5)    | 1.0000   |
| C(6)-C(7)    | 1.380(7) |
| C(6)-C(11)   | 1.393(6) |
| C(7)-C(8)    | 1.392(7) |
| C(7)-H(7)    | 0.9500   |
| C(8)-C(9)    | 1.399(7) |
| C(8)-H(8)    | 0.9500   |
| C(9)-C(10)   | 1.385(7) |
| C(9)-C(12)   | 1.446(7) |
| C(10)-C(11)  | 1.385(6) |
| C(10)-H(10)  | 0.9500   |
| C(11)-H(11)  | 0.9500   |
| C(13)-C(14)  | 1.529(6) |
| C(13)-H(13A) | 0.9900   |
| C(13)-H(13B) | 0.9900   |
| C(14)-H(14A) | 0.9800   |
| C(14)-H(14B) | 0.9800   |
| C(14)-H(14C) | 0.9800   |
| C(15)-C(16)  | 1.536(6) |
| C(15)-H(15A) | 0.9900   |
| C(15)-H(15B) | 0.9900   |
| C(16)-H(16A) | 0.9800   |
| C(16)-H(16B) | 0.9800   |
| C(16)-H(16C) | 0.9800   |
| C(17)-H(17A) | 0.9800   |
| C(17)-H(17B) | 0.9800   |

|              |          |
|--------------|----------|
| C(17)-H(17C) | 0.9800   |
| C(18)-C(23)  | 1.374(6) |
| C(18)-C(19)  | 1.381(6) |
| C(19)-C(20)  | 1.393(6) |
| C(19)-H(19)  | 0.9500   |
| C(20)-C(21)  | 1.380(7) |
| C(20)-H(20)  | 0.9500   |
| C(21)-C(22)  | 1.377(7) |
| C(21)-H(21)  | 0.9500   |
| C(22)-C(23)  | 1.392(6) |
| C(22)-H(22)  | 0.9500   |
| C(23)-H(23)  | 0.9500   |
| N(3)-C(41)   | 1.483(5) |
| N(3)-C(28)   | 1.538(5) |
| N(3)-C(24)   | 1.546(5) |
| N(3)-H(3A)   | 1.01(5)  |
| N(4)-C(35)   | 1.147(6) |
| C(24)-C(36)  | 1.532(6) |
| C(24)-C(25)  | 1.547(6) |
| C(24)-H(24)  | 1.0000   |
| C(25)-C(38)  | 1.532(6) |
| C(25)-C(26)  | 1.545(6) |
| C(25)-H(25)  | 1.0000   |
| C(26)-C(27)  | 1.516(6) |
| C(26)-C(40)  | 1.533(6) |
| C(26)-H(26)  | 1.0000   |
| C(27)-C(28)  | 1.518(6) |
| C(27)-H(27A) | 0.9900   |
| C(27)-H(27B) | 0.9900   |
| C(28)-C(29)  | 1.515(6) |
| C(28)-H(28)  | 1.0000   |
| C(29)-C(34)  | 1.389(6) |
| C(29)-C(30)  | 1.392(6) |
| C(30)-C(31)  | 1.379(6) |
| C(30)-H(30)  | 0.9500   |

|                |            |
|----------------|------------|
| C(31)-C(32)    | 1.384(6)   |
| C(31)-H(31)    | 0.9500     |
| C(32)-C(33)    | 1.397(7)   |
| C(32)-C(35)    | 1.453(6)   |
| C(33)-C(34)    | 1.375(6)   |
| C(33)-H(33)    | 0.9500     |
| C(34)-H(34)    | 0.9500     |
| C(36)-C(37)    | 1.520(6)   |
| C(36)-H(36A)   | 0.9900     |
| C(36)-H(36B)   | 0.9900     |
| C(37)-H(37A)   | 0.9800     |
| C(37)-H(37B)   | 0.9800     |
| C(37)-H(37C)   | 0.9800     |
| C(38)-C(39)    | 1.524(6)   |
| C(38)-H(38A)   | 0.9900     |
| C(38)-H(38B)   | 0.9900     |
| C(39)-H(39A)   | 0.9800     |
| C(39)-H(39B)   | 0.9800     |
| C(39)-H(39C)   | 0.9800     |
| C(40)-H(40A)   | 0.9800     |
| C(40)-H(40B)   | 0.9800     |
| C(40)-H(40C)   | 0.9800     |
| C(41)-C(42)    | 1.382(6)   |
| C(41)-C(46)    | 1.384(6)   |
| C(42)-C(43)    | 1.379(6)   |
| C(42)-H(42)    | 0.9500     |
| C(43)-C(44)    | 1.388(7)   |
| C(43)-H(43)    | 0.9500     |
| C(44)-C(45)    | 1.372(7)   |
| C(44)-H(44)    | 0.9500     |
| C(45)-C(46)    | 1.396(6)   |
| C(45)-H(45)    | 0.9500     |
| C(46)-H(46)    | 0.9500     |
| O(2)-S(1)-O(1) | 114.75(18) |

|                   |            |
|-------------------|------------|
| O(2)-S(1)-O(3)    | 115.37(18) |
| O(1)-S(1)-O(3)    | 113.39(17) |
| O(2)-S(1)-C(47)   | 106.75(18) |
| O(1)-S(1)-C(47)   | 103.11(17) |
| O(3)-S(1)-C(47)   | 101.43(18) |
| O(4)-N(5)-O(5)    | 124.8(4)   |
| O(4)-N(5)-C(48)   | 118.3(3)   |
| O(5)-N(5)-C(48)   | 116.9(4)   |
| O(7)-N(6)-O(6)    | 125.2(4)   |
| O(7)-N(6)-C(50)   | 117.7(3)   |
| O(6)-N(6)-C(50)   | 117.1(4)   |
| O(9)-N(7)-O(8)    | 125.3(4)   |
| O(9)-N(7)-C(52)   | 116.8(4)   |
| O(8)-N(7)-C(52)   | 117.8(4)   |
| C(52)-C(47)-C(48) | 114.4(4)   |
| C(52)-C(47)-S(1)  | 121.6(3)   |
| C(48)-C(47)-S(1)  | 123.1(3)   |
| C(49)-C(48)-C(47) | 123.6(4)   |
| C(49)-C(48)-N(5)  | 116.0(4)   |
| C(47)-C(48)-N(5)  | 120.4(4)   |
| C(50)-C(49)-C(48) | 117.9(4)   |
| C(50)-C(49)-H(49) | 121.0      |
| C(48)-C(49)-H(49) | 121.0      |
| C(49)-C(50)-C(51) | 122.7(4)   |
| C(49)-C(50)-N(6)  | 118.9(4)   |
| C(51)-C(50)-N(6)  | 118.4(4)   |
| C(50)-C(51)-C(52) | 116.7(4)   |
| C(50)-C(51)-H(51) | 121.6      |
| C(52)-C(51)-H(51) | 121.6      |
| C(51)-C(52)-C(47) | 124.6(4)   |
| C(51)-C(52)-N(7)  | 115.3(4)   |
| C(47)-C(52)-N(7)  | 120.1(4)   |
| O(11)-S(2)-O(10)  | 114.72(19) |
| O(11)-S(2)-O(12)  | 113.61(18) |
| O(10)-S(2)-O(12)  | 113.82(18) |

|                   |            |
|-------------------|------------|
| O(11)-S(2)-C(53)  | 104.19(19) |
| O(10)-S(2)-C(53)  | 106.36(18) |
| O(12)-S(2)-C(53)  | 102.53(18) |
| O(13)-N(8)-O(14)  | 126.8(4)   |
| O(13)-N(8)-C(54)  | 116.3(4)   |
| O(14)-N(8)-C(54)  | 116.8(4)   |
| O(16)-N(9)-O(15)  | 125.3(4)   |
| O(16)-N(9)-C(56)  | 118.3(4)   |
| O(15)-N(9)-C(56)  | 116.4(4)   |
| O(17)-N(10)-O(18) | 125.0(4)   |
| O(17)-N(10)-C(58) | 118.4(4)   |
| O(18)-N(10)-C(58) | 116.5(4)   |
| C(58)-C(53)-C(54) | 115.3(4)   |
| C(58)-C(53)-S(2)  | 122.0(3)   |
| C(54)-C(53)-S(2)  | 122.5(3)   |
| C(55)-C(54)-C(53) | 123.5(4)   |
| C(55)-C(54)-N(8)  | 114.4(4)   |
| C(53)-C(54)-N(8)  | 122.1(4)   |
| C(54)-C(55)-C(56) | 117.0(4)   |
| C(54)-C(55)-H(55) | 121.5      |
| C(56)-C(55)-H(55) | 121.5      |
| C(57)-C(56)-C(55) | 123.0(4)   |
| C(57)-C(56)-N(9)  | 118.7(4)   |
| C(55)-C(56)-N(9)  | 118.2(4)   |
| C(56)-C(57)-C(58) | 117.0(4)   |
| C(56)-C(57)-H(57) | 121.5      |
| C(58)-C(57)-H(57) | 121.5      |
| C(57)-C(58)-C(53) | 124.0(4)   |
| C(57)-C(58)-N(10) | 115.9(4)   |
| C(53)-C(58)-N(10) | 120.2(4)   |
| C(18)-N(1)-C(1)   | 112.5(3)   |
| C(18)-N(1)-C(5)   | 108.9(3)   |
| C(1)-N(1)-C(5)    | 111.8(3)   |
| C(18)-N(1)-H(1)   | 112(3)     |
| C(1)-N(1)-H(1)    | 104(3)     |

|                  |          |
|------------------|----------|
| C(5)-N(1)-H(1)   | 107(3)   |
| C(13)-C(1)-C(2)  | 114.7(4) |
| C(13)-C(1)-N(1)  | 109.7(3) |
| C(2)-C(1)-N(1)   | 110.3(3) |
| C(13)-C(1)-H(1A) | 107.3    |
| C(2)-C(1)-H(1A)  | 107.3    |
| N(1)-C(1)-H(1A)  | 107.3    |
| C(1)-C(2)-C(3)   | 108.7(4) |
| C(1)-C(2)-C(15)  | 114.6(3) |
| C(3)-C(2)-C(15)  | 114.3(4) |
| C(1)-C(2)-H(2)   | 106.2    |
| C(3)-C(2)-H(2)   | 106.2    |
| C(15)-C(2)-H(2)  | 106.2    |
| C(4)-C(3)-C(2)   | 110.9(4) |
| C(4)-C(3)-C(17)  | 111.3(4) |
| C(2)-C(3)-C(17)  | 113.1(4) |
| C(4)-C(3)-H(3)   | 107.0    |
| C(2)-C(3)-H(3)   | 107.0    |
| C(17)-C(3)-H(3)  | 107.0    |
| C(5)-C(4)-C(3)   | 111.5(4) |
| C(5)-C(4)-H(4A)  | 109.3    |
| C(3)-C(4)-H(4A)  | 109.3    |
| C(5)-C(4)-H(4B)  | 109.3    |
| C(3)-C(4)-H(4B)  | 109.3    |
| H(4A)-C(4)-H(4B) | 108.0    |
| C(4)-C(5)-C(6)   | 114.3(4) |
| C(4)-C(5)-N(1)   | 109.5(4) |
| C(6)-C(5)-N(1)   | 110.4(3) |
| C(4)-C(5)-H(5)   | 107.5    |
| C(6)-C(5)-H(5)   | 107.5    |
| N(1)-C(5)-H(5)   | 107.5    |
| C(7)-C(6)-C(11)  | 119.6(4) |
| C(7)-C(6)-C(5)   | 119.2(4) |
| C(11)-C(6)-C(5)  | 121.1(4) |
| C(6)-C(7)-C(8)   | 120.6(5) |



|                     |          |
|---------------------|----------|
| C(6)-C(7)-H(7)      | 119.7    |
| C(8)-C(7)-H(7)      | 119.7    |
| C(7)-C(8)-C(9)      | 119.2(5) |
| C(7)-C(8)-H(8)      | 120.4    |
| C(9)-C(8)-H(8)      | 120.4    |
| C(10)-C(9)-C(8)     | 120.4(4) |
| C(10)-C(9)-C(12)    | 119.1(4) |
| C(8)-C(9)-C(12)     | 120.5(5) |
| C(11)-C(10)-C(9)    | 119.6(4) |
| C(11)-C(10)-H(10)   | 120.2    |
| C(9)-C(10)-H(10)    | 120.2    |
| C(10)-C(11)-C(6)    | 120.6(4) |
| C(10)-C(11)-H(11)   | 119.7    |
| C(6)-C(11)-H(11)    | 119.7    |
| N(2)-C(12)-C(9)     | 177.5(7) |
| C(1)-C(13)-C(14)    | 113.0(4) |
| C(1)-C(13)-H(13A)   | 109.0    |
| C(14)-C(13)-H(13A)  | 109.0    |
| C(1)-C(13)-H(13B)   | 109.0    |
| C(14)-C(13)-H(13B)  | 109.0    |
| H(13A)-C(13)-H(13B) | 107.8    |
| C(13)-C(14)-H(14A)  | 109.5    |
| C(13)-C(14)-H(14B)  | 109.5    |
| H(14A)-C(14)-H(14B) | 109.5    |
| C(13)-C(14)-H(14C)  | 109.5    |
| H(14A)-C(14)-H(14C) | 109.5    |
| H(14B)-C(14)-H(14C) | 109.5    |
| C(16)-C(15)-C(2)    | 114.0(4) |
| C(16)-C(15)-H(15A)  | 108.8    |
| C(2)-C(15)-H(15A)   | 108.8    |
| C(16)-C(15)-H(15B)  | 108.8    |
| C(2)-C(15)-H(15B)   | 108.8    |
| H(15A)-C(15)-H(15B) | 107.7    |
| C(15)-C(16)-H(16A)  | 109.5    |
| C(15)-C(16)-H(16B)  | 109.5    |

|                     |          |
|---------------------|----------|
| H(16A)-C(16)-H(16B) | 109.5    |
| C(15)-C(16)-H(16C)  | 109.5    |
| H(16A)-C(16)-H(16C) | 109.5    |
| H(16B)-C(16)-H(16C) | 109.5    |
| C(3)-C(17)-H(17A)   | 109.5    |
| C(3)-C(17)-H(17B)   | 109.5    |
| H(17A)-C(17)-H(17B) | 109.5    |
| C(3)-C(17)-H(17C)   | 109.5    |
| H(17A)-C(17)-H(17C) | 109.5    |
| H(17B)-C(17)-H(17C) | 109.5    |
| C(23)-C(18)-C(19)   | 122.6(4) |
| C(23)-C(18)-N(1)    | 119.4(4) |
| C(19)-C(18)-N(1)    | 117.9(4) |
| C(18)-C(19)-C(20)   | 118.1(4) |
| C(18)-C(19)-H(19)   | 121.0    |
| C(20)-C(19)-H(19)   | 121.0    |
| C(21)-C(20)-C(19)   | 120.1(5) |
| C(21)-C(20)-H(20)   | 119.9    |
| C(19)-C(20)-H(20)   | 119.9    |
| C(22)-C(21)-C(20)   | 120.6(4) |
| C(22)-C(21)-H(21)   | 119.7    |
| C(20)-C(21)-H(21)   | 119.7    |
| C(21)-C(22)-C(23)   | 120.1(4) |
| C(21)-C(22)-H(22)   | 120.0    |
| C(23)-C(22)-H(22)   | 120.0    |
| C(18)-C(23)-C(22)   | 118.4(4) |
| C(18)-C(23)-H(23)   | 120.8    |
| C(22)-C(23)-H(23)   | 120.8    |
| C(41)-N(3)-C(28)    | 108.6(3) |
| C(41)-N(3)-C(24)    | 111.4(3) |
| C(28)-N(3)-C(24)    | 113.5(3) |
| C(41)-N(3)-H(3A)    | 105(2)   |
| C(28)-N(3)-H(3A)    | 110(2)   |
| C(24)-N(3)-H(3A)    | 108(2)   |
| C(36)-C(24)-N(3)    | 108.0(3) |

|                     |          |
|---------------------|----------|
| C(36)-C(24)-C(25)   | 115.0(4) |
| N(3)-C(24)-C(25)    | 110.2(3) |
| C(36)-C(24)-H(24)   | 107.8    |
| N(3)-C(24)-H(24)    | 107.8    |
| C(25)-C(24)-H(24)   | 107.8    |
| C(38)-C(25)-C(26)   | 114.3(3) |
| C(38)-C(25)-C(24)   | 114.9(3) |
| C(26)-C(25)-C(24)   | 108.6(3) |
| C(38)-C(25)-H(25)   | 106.1    |
| C(26)-C(25)-H(25)   | 106.1    |
| C(24)-C(25)-H(25)   | 106.1    |
| C(27)-C(26)-C(40)   | 110.1(3) |
| C(27)-C(26)-C(25)   | 110.7(3) |
| C(40)-C(26)-C(25)   | 112.5(4) |
| C(27)-C(26)-H(26)   | 107.8    |
| C(40)-C(26)-H(26)   | 107.8    |
| C(25)-C(26)-H(26)   | 107.8    |
| C(26)-C(27)-C(28)   | 111.6(3) |
| C(26)-C(27)-H(27A)  | 109.3    |
| C(28)-C(27)-H(27A)  | 109.3    |
| C(26)-C(27)-H(27B)  | 109.3    |
| C(28)-C(27)-H(27B)  | 109.3    |
| H(27A)-C(27)-H(27B) | 108.0    |
| C(29)-C(28)-C(27)   | 113.0(3) |
| C(29)-C(28)-N(3)    | 108.5(3) |
| C(27)-C(28)-N(3)    | 110.6(3) |
| C(29)-C(28)-H(28)   | 108.2    |
| C(27)-C(28)-H(28)   | 108.2    |
| N(3)-C(28)-H(28)    | 108.2    |
| C(34)-C(29)-C(30)   | 119.5(4) |
| C(34)-C(29)-C(28)   | 120.4(4) |
| C(30)-C(29)-C(28)   | 120.0(4) |
| C(31)-C(30)-C(29)   | 121.2(4) |
| C(31)-C(30)-H(30)   | 119.4    |
| C(29)-C(30)-H(30)   | 119.4    |

|                     |          |
|---------------------|----------|
| C(30)-C(31)-C(32)   | 118.7(4) |
| C(30)-C(31)-H(31)   | 120.7    |
| C(32)-C(31)-H(31)   | 120.7    |
| C(31)-C(32)-C(33)   | 120.8(4) |
| C(31)-C(32)-C(35)   | 118.8(4) |
| C(33)-C(32)-C(35)   | 120.5(4) |
| C(34)-C(33)-C(32)   | 119.9(4) |
| C(34)-C(33)-H(33)   | 120.1    |
| C(32)-C(33)-H(33)   | 120.1    |
| C(33)-C(34)-C(29)   | 120.0(4) |
| C(33)-C(34)-H(34)   | 120.0    |
| C(29)-C(34)-H(34)   | 120.0    |
| N(4)-C(35)-C(32)    | 178.0(5) |
| C(37)-C(36)-C(24)   | 113.4(4) |
| C(37)-C(36)-H(36A)  | 108.9    |
| C(24)-C(36)-H(36A)  | 108.9    |
| C(37)-C(36)-H(36B)  | 108.9    |
| C(24)-C(36)-H(36B)  | 108.9    |
| H(36A)-C(36)-H(36B) | 107.7    |
| C(36)-C(37)-H(37A)  | 109.5    |
| C(36)-C(37)-H(37B)  | 109.5    |
| H(37A)-C(37)-H(37B) | 109.5    |
| C(36)-C(37)-H(37C)  | 109.5    |
| H(37A)-C(37)-H(37C) | 109.5    |
| H(37B)-C(37)-H(37C) | 109.5    |
| C(39)-C(38)-C(25)   | 113.6(4) |
| C(39)-C(38)-H(38A)  | 108.8    |
| C(25)-C(38)-H(38A)  | 108.8    |
| C(39)-C(38)-H(38B)  | 108.8    |
| C(25)-C(38)-H(38B)  | 108.8    |
| H(38A)-C(38)-H(38B) | 107.7    |
| C(38)-C(39)-H(39A)  | 109.5    |
| C(38)-C(39)-H(39B)  | 109.5    |
| H(39A)-C(39)-H(39B) | 109.5    |
| C(38)-C(39)-H(39C)  | 109.5    |

|                     |          |
|---------------------|----------|
| H(39A)-C(39)-H(39C) | 109.5    |
| H(39B)-C(39)-H(39C) | 109.5    |
| C(26)-C(40)-H(40A)  | 109.5    |
| C(26)-C(40)-H(40B)  | 109.5    |
| H(40A)-C(40)-H(40B) | 109.5    |
| C(26)-C(40)-H(40C)  | 109.5    |
| H(40A)-C(40)-H(40C) | 109.5    |
| H(40B)-C(40)-H(40C) | 109.5    |
| C(42)-C(41)-C(46)   | 122.0(4) |
| C(42)-C(41)-N(3)    | 119.7(4) |
| C(46)-C(41)-N(3)    | 118.3(4) |
| C(43)-C(42)-C(41)   | 118.8(4) |
| C(43)-C(42)-H(42)   | 120.6    |
| C(41)-C(42)-H(42)   | 120.6    |
| C(42)-C(43)-C(44)   | 120.2(4) |
| C(42)-C(43)-H(43)   | 119.9    |
| C(44)-C(43)-H(43)   | 119.9    |
| C(45)-C(44)-C(43)   | 120.3(4) |
| C(45)-C(44)-H(44)   | 119.9    |
| C(43)-C(44)-H(44)   | 119.9    |
| C(44)-C(45)-C(46)   | 120.5(4) |
| C(44)-C(45)-H(45)   | 119.8    |
| C(46)-C(45)-H(45)   | 119.8    |
| C(41)-C(46)-C(45)   | 118.1(4) |
| C(41)-C(46)-H(46)   | 120.9    |
| C(45)-C(46)-H(46)   | 120.9    |

---

Symmetry transformations used to generate equivalent atoms:

Table S13. Anisotropic displacement parameters ( $\text{\AA}^2 \times 10^3$ ) for 007b-19018. The anisotropic displacement factor exponent takes the form:  $-2\pi^2 [h^2 a^{*2} U^{11} + \dots + 2 h k a^* b^* U^{12}]$

|      | $U^{11}$ | $U^{22}$ | $U^{33}$ | $U^{23}$ | $U^{13}$ | $U^{12}$ |
|------|----------|----------|----------|----------|----------|----------|
| S(1) | 30(1)    | 30(1)    | 35(1)    | 2(1)     | 10(1)    | -1(1)    |
| O(1) | 31(2)    | 32(2)    | 36(2)    | -1(1)    | 13(1)    | 1(1)     |

|       |       |       |       |       |       |        |
|-------|-------|-------|-------|-------|-------|--------|
| O(2)  | 29(2) | 44(2) | 44(2) | 2(1)  | 9(1)  | -1(1)  |
| O(3)  | 39(2) | 28(2) | 41(2) | 5(1)  | 9(1)  | -2(1)  |
| O(4)  | 34(2) | 41(2) | 49(2) | 3(1)  | 12(1) | 7(1)   |
| O(5)  | 70(2) | 27(2) | 45(2) | -2(1) | 5(2)  | -2(2)  |
| O(6)  | 42(2) | 42(2) | 36(2) | -2(1) | 10(1) | -2(1)  |
| O(7)  | 46(2) | 36(2) | 43(2) | 7(1)  | 12(1) | -2(1)  |
| O(8)  | 54(2) | 36(2) | 45(2) | 1(1)  | 19(2) | 9(2)   |
| O(9)  | 51(2) | 37(2) | 38(2) | -5(1) | 10(1) | -11(1) |
| N(5)  | 42(2) | 28(2) | 41(2) | 0(2)  | 12(2) | 2(2)   |
| N(6)  | 31(2) | 36(2) | 38(2) | 1(2)  | 11(1) | -4(2)  |
| N(7)  | 46(2) | 30(2) | 35(2) | 1(2)  | 15(2) | -2(2)  |
| C(47) | 24(2) | 28(2) | 39(2) | 3(2)  | 10(2) | -3(2)  |
| C(48) | 26(2) | 28(2) | 39(2) | 0(2)  | 9(2)  | 0(2)   |
| C(49) | 28(2) | 31(2) | 38(2) | -4(2) | 11(2) | -4(2)  |
| C(50) | 29(2) | 33(2) | 34(2) | 3(2)  | 10(2) | -1(2)  |
| C(51) | 32(2) | 28(2) | 40(2) | 1(2)  | 12(2) | -1(2)  |
| C(52) | 34(2) | 28(2) | 37(2) | -5(2) | 11(2) | -4(2)  |
| S(2)  | 36(1) | 28(1) | 33(1) | -1(1) | 3(1)  | 0(1)   |
| O(10) | 40(2) | 29(2) | 39(2) | -3(1) | 3(1)  | 4(1)   |
| O(11) | 44(2) | 45(2) | 31(2) | 2(1)  | 7(1)  | -2(1)  |
| O(12) | 37(2) | 27(2) | 44(2) | -2(1) | 2(1)  | -5(1)  |
| O(13) | 55(2) | 49(2) | 61(2) | 15(2) | 5(2)  | -14(2) |
| O(14) | 58(2) | 94(3) | 61(2) | 21(2) | 30(2) | 29(2)  |
| O(15) | 62(2) | 46(2) | 38(2) | 7(2)  | 5(2)  | 6(2)   |
| O(16) | 40(2) | 69(3) | 57(2) | 8(2)  | -2(2) | 9(2)   |
| O(17) | 40(2) | 42(2) | 65(2) | 5(2)  | 12(2) | -2(2)  |
| O(18) | 56(2) | 47(2) | 66(2) | -6(2) | 18(2) | -18(2) |
| N(8)  | 38(2) | 53(3) | 46(2) | 10(2) | 9(2)  | 2(2)   |
| N(9)  | 45(3) | 39(2) | 39(2) | 4(2)  | 0(2)  | 6(2)   |
| N(10) | 48(2) | 35(2) | 36(2) | 3(2)  | 7(2)  | -3(2)  |
| C(53) | 37(2) | 23(2) | 36(2) | -3(2) | 5(2)  | 0(2)   |
| C(54) | 34(2) | 34(2) | 32(2) | 2(2)  | 10(2) | -1(2)  |
| C(55) | 32(2) | 37(2) | 38(2) | 2(2)  | 6(2)  | -1(2)  |
| C(56) | 38(3) | 29(2) | 33(2) | 1(2)  | 0(2)  | 6(2)   |
| C(57) | 45(3) | 31(2) | 31(2) | 3(2)  | 6(2)  | 0(2)   |

|       |        |       |       |        |       |        |
|-------|--------|-------|-------|--------|-------|--------|
| C(58) | 35(2)  | 27(2) | 39(2) | -2(2)  | 6(2)  | -1(2)  |
| N(1)  | 26(2)  | 35(2) | 35(2) | -1(2)  | 7(1)  | 1(1)   |
| N(2)  | 117(4) | 49(3) | 54(3) | -3(2)  | 31(3) | -10(3) |
| C(1)  | 37(2)  | 35(2) | 32(2) | 0(2)   | 10(2) | -1(2)  |
| C(2)  | 29(2)  | 39(3) | 32(2) | 0(2)   | 5(2)  | -6(2)  |
| C(3)  | 35(3)  | 45(3) | 38(2) | 3(2)   | 8(2)  | -2(2)  |
| C(4)  | 36(3)  | 43(3) | 42(2) | 1(2)   | 10(2) | -1(2)  |
| C(5)  | 30(2)  | 40(3) | 36(2) | 4(2)   | 7(2)  | 6(2)   |
| C(6)  | 34(2)  | 38(2) | 37(2) | 0(2)   | 10(2) | 3(2)   |
| C(7)  | 62(3)  | 43(3) | 40(2) | -1(2)  | 16(2) | -8(2)  |
| C(8)  | 85(4)  | 38(3) | 49(3) | -8(2)  | 19(3) | -17(3) |
| C(9)  | 56(3)  | 41(3) | 46(3) | -4(2)  | 17(2) | 2(2)   |
| C(10) | 42(3)  | 39(3) | 40(2) | 2(2)   | 11(2) | 4(2)   |
| C(11) | 41(3)  | 33(2) | 42(2) | 0(2)   | 8(2)  | 9(2)   |
| C(12) | 80(4)  | 42(3) | 49(3) | -6(2)  | 21(3) | -10(3) |
| C(13) | 35(3)  | 38(3) | 41(2) | -1(2)  | 10(2) | -1(2)  |
| C(14) | 42(3)  | 41(3) | 46(3) | -5(2)  | 12(2) | -1(2)  |
| C(15) | 40(3)  | 40(3) | 33(2) | -1(2)  | 6(2)  | -6(2)  |
| C(16) | 60(3)  | 42(3) | 43(3) | -3(2)  | 9(2)  | -18(2) |
| C(17) | 34(3)  | 64(3) | 43(3) | 0(2)   | 6(2)  | -5(2)  |
| C(18) | 28(2)  | 35(2) | 39(2) | -4(2)  | 7(2)  | -2(2)  |
| C(19) | 34(3)  | 42(3) | 42(2) | -3(2)  | 4(2)  | -3(2)  |
| C(20) | 35(3)  | 49(3) | 52(3) | -10(2) | 1(2)  | -3(2)  |
| C(21) | 34(3)  | 45(3) | 59(3) | -15(2) | 11(2) | -5(2)  |
| C(22) | 35(3)  | 36(2) | 55(3) | -5(2)  | 20(2) | -2(2)  |
| C(23) | 33(2)  | 41(3) | 43(2) | 1(2)   | 10(2) | -1(2)  |
| N(3)  | 24(2)  | 31(2) | 31(2) | 0(1)   | 5(1)  | 1(1)   |
| N(4)  | 68(3)  | 54(3) | 41(2) | 7(2)   | 8(2)  | -4(2)  |
| C(24) | 31(2)  | 34(2) | 33(2) | 1(2)   | 9(2)  | 0(2)   |
| C(25) | 30(2)  | 29(2) | 31(2) | 4(2)   | 4(2)  | -1(2)  |
| C(26) | 30(2)  | 29(2) | 38(2) | 3(2)   | 5(2)  | 1(2)   |
| C(27) | 27(2)  | 32(2) | 37(2) | 1(2)   | 6(2)  | 2(2)   |
| C(28) | 29(2)  | 27(2) | 37(2) | 1(2)   | 9(2)  | 4(2)   |
| C(29) | 26(2)  | 31(2) | 37(2) | 1(2)   | 6(2)  | -2(2)  |
| C(30) | 37(3)  | 30(2) | 39(2) | -2(2)  | 8(2)  | 1(2)   |

|       |       |       |       |       |       |        |
|-------|-------|-------|-------|-------|-------|--------|
| C(31) | 36(2) | 32(2) | 40(2) | 5(2)  | 9(2)  | 1(2)   |
| C(32) | 38(3) | 39(3) | 39(2) | 4(2)  | 8(2)  | 1(2)   |
| C(33) | 59(3) | 42(3) | 37(2) | -2(2) | 7(2)  | -10(2) |
| C(34) | 47(3) | 32(2) | 39(2) | 0(2)  | 9(2)  | -10(2) |
| C(35) | 49(3) | 43(3) | 37(3) | 1(2)  | 6(2)  | -3(2)  |
| C(36) | 30(2) | 38(2) | 40(2) | 1(2)  | 9(2)  | 4(2)   |
| C(37) | 40(3) | 45(3) | 41(2) | -3(2) | 11(2) | 1(2)   |
| C(38) | 34(2) | 30(2) | 35(2) | 1(2)  | 3(2)  | -1(2)  |
| C(39) | 55(3) | 41(3) | 39(2) | -3(2) | -2(2) | -6(2)  |
| C(40) | 33(2) | 41(3) | 43(2) | 4(2)  | 1(2)  | 1(2)   |
| C(41) | 25(2) | 36(2) | 33(2) | -2(2) | 4(2)  | -1(2)  |
| C(42) | 28(2) | 36(2) | 40(2) | 0(2)  | 8(2)  | -4(2)  |
| C(43) | 31(2) | 44(3) | 44(2) | -3(2) | 10(2) | -7(2)  |
| C(44) | 28(2) | 47(3) | 42(2) | -1(2) | 5(2)  | -6(2)  |
| C(45) | 30(2) | 49(3) | 41(2) | 6(2)  | 4(2)  | 3(2)   |
| C(46) | 28(2) | 35(2) | 38(2) | 2(2)  | 7(2)  | -2(2)  |

Table S14. Hydrogen coordinates ( $\times 10^4$ ) and isotropic displacement parameters ( $\text{\AA}^2 \times 10^3$ ) for 007b-19018.

|       | x     | y     | z     | U(eq) |
|-------|-------|-------|-------|-------|
| H(49) | 7576  | 9568  | 4009  | 38    |
| H(51) | 6349  | 10696 | 4519  | 39    |
| H(55) | 5940  | 8365  | 10423 | 43    |
| H(57) | 9748  | 8759  | 9696  | 43    |
| H(1A) | 7507  | 5958  | 8328  | 41    |
| H(2)  | 9092  | 6524  | 8554  | 40    |
| H(3)  | 10381 | 5905  | 8490  | 47    |
| H(4A) | 10681 | 6104  | 7389  | 48    |
| H(4B) | 11526 | 5713  | 7710  | 48    |
| H(5)  | 8965  | 5442  | 7805  | 42    |
| H(7)  | 8591  | 4860  | 7296  | 57    |
| H(8)  | 8582  | 4487  | 6486  | 67    |



|        |       |      |      |    |
|--------|-------|------|------|----|
| H(10)  | 9378  | 5548 | 5698 | 48 |
| H(11)  | 9392  | 5913 | 6509 | 46 |
| H(13A) | 5024  | 6231 | 7968 | 45 |
| H(13B) | 5862  | 6599 | 7681 | 45 |
| H(14A) | 6067  | 6515 | 8839 | 64 |
| H(14B) | 4893  | 6836 | 8479 | 64 |
| H(14C) | 6834  | 6889 | 8541 | 64 |
| H(15A) | 9955  | 6726 | 7540 | 45 |
| H(15B) | 8135  | 6858 | 7607 | 45 |
| H(16A) | 9208  | 7248 | 8403 | 73 |
| H(16B) | 9879  | 7414 | 7871 | 73 |
| H(16C) | 11017 | 7132 | 8301 | 73 |
| H(17A) | 12094 | 6491 | 8739 | 71 |
| H(17B) | 12472 | 6508 | 8125 | 71 |
| H(17C) | 13028 | 6117 | 8500 | 71 |
| H(19)  | 5397  | 5963 | 6598 | 47 |
| H(20)  | 3101  | 5543 | 6325 | 55 |
| H(21)  | 2404  | 5032 | 6905 | 54 |
| H(22)  | 3974  | 4926 | 7751 | 49 |
| H(23)  | 6252  | 5348 | 8035 | 46 |
| H(24)  | 7992  | 8484 | 5514 | 39 |
| H(25)  | 6049  | 8213 | 4851 | 36 |
| H(26)  | 5164  | 8712 | 5405 | 39 |
| H(27A) | 4226  | 8064 | 6075 | 38 |
| H(27B) | 3817  | 8541 | 6152 | 38 |
| H(28)  | 6592  | 8700 | 6368 | 37 |
| H(30)  | 5428  | 7711 | 6851 | 42 |
| H(31)  | 5443  | 7535 | 7762 | 43 |
| H(33)  | 6856  | 8701 | 8199 | 55 |
| H(34)  | 6961  | 8863 | 7291 | 47 |
| H(36A) | 10070 | 8003 | 5622 | 43 |
| H(36B) | 8809  | 7627 | 5544 | 43 |
| H(37A) | 8093  | 7788 | 4617 | 62 |
| H(37B) | 10032 | 7731 | 4750 | 62 |
| H(37C) | 9259  | 8183 | 4687 | 62 |

|        |          |          |          |        |
|--------|----------|----------|----------|--------|
| H(38A) | 6324     | 7494     | 5307     | 40     |
| H(38B) | 4582     | 7633     | 5448     | 40     |
| H(39A) | 5387     | 7570     | 4370     | 69     |
| H(39B) | 3664     | 7736     | 4498     | 69     |
| H(39C) | 4181     | 7268     | 4628     | 69     |
| H(40A) | 3120     | 8460     | 4712     | 59     |
| H(40B) | 2324     | 8613     | 5226     | 59     |
| H(40C) | 2568     | 8131     | 5129     | 59     |
| H(42)  | 9261     | 8829     | 6314     | 41     |
| H(43)  | 11671    | 8971     | 6904     | 47     |
| H(44)  | 13009    | 8447     | 7441     | 47     |
| H(45)  | 11983    | 7782     | 7381     | 48     |
| H(46)  | 9519     | 7635     | 6807     | 40     |
| H(3A)  | 7350(50) | 7836(15) | 6252(18) | 32(11) |
| H(1)   | 7630(60) | 6143(18) | 7240(20) | 52(15) |

---

Table S15. Torsion angles [°] for 007b-19018.

|                         |           |
|-------------------------|-----------|
| O(2)-S(1)-C(47)-C(52)   | -102.0(3) |
| O(1)-S(1)-C(47)-C(52)   | 19.3(4)   |
| O(3)-S(1)-C(47)-C(52)   | 136.9(3)  |
| O(2)-S(1)-C(47)-C(48)   | 89.9(4)   |
| O(1)-S(1)-C(47)-C(48)   | -148.8(3) |
| O(3)-S(1)-C(47)-C(48)   | -31.3(4)  |
| C(52)-C(47)-C(48)-C(49) | -2.5(6)   |
| S(1)-C(47)-C(48)-C(49)  | 166.4(3)  |
| C(52)-C(47)-C(48)-N(5)  | 177.1(4)  |
| S(1)-C(47)-C(48)-N(5)   | -14.0(5)  |
| O(4)-N(5)-C(48)-C(49)   | 130.1(4)  |
| O(5)-N(5)-C(48)-C(49)   | -47.3(5)  |
| O(4)-N(5)-C(48)-C(47)   | -49.5(5)  |
| O(5)-N(5)-C(48)-C(47)   | 133.1(4)  |
| C(47)-C(48)-C(49)-C(50) | 0.2(6)    |

|                         |           |
|-------------------------|-----------|
| N(5)-C(48)-C(49)-C(50)  | -179.4(4) |
| C(48)-C(49)-C(50)-C(51) | 0.8(6)    |
| C(48)-C(49)-C(50)-N(6)  | -179.0(3) |
| O(7)-N(6)-C(50)-C(49)   | -172.7(4) |
| O(6)-N(6)-C(50)-C(49)   | 7.7(5)    |
| O(7)-N(6)-C(50)-C(51)   | 7.4(5)    |
| O(6)-N(6)-C(50)-C(51)   | -172.1(4) |
| C(49)-C(50)-C(51)-C(52) | 0.5(6)    |
| N(6)-C(50)-C(51)-C(52)  | -179.7(3) |
| C(50)-C(51)-C(52)-C(47) | -3.1(6)   |
| C(50)-C(51)-C(52)-N(7)  | 174.2(4)  |
| C(48)-C(47)-C(52)-C(51) | 4.0(6)    |
| S(1)-C(47)-C(52)-C(51)  | -165.1(3) |
| C(48)-C(47)-C(52)-N(7)  | -173.2(4) |
| S(1)-C(47)-C(52)-N(7)   | 17.7(5)   |
| O(9)-N(7)-C(52)-C(51)   | -117.6(4) |
| O(8)-N(7)-C(52)-C(51)   | 58.5(5)   |
| O(9)-N(7)-C(52)-C(47)   | 59.8(5)   |
| O(8)-N(7)-C(52)-C(47)   | -124.1(4) |
| O(11)-S(2)-C(53)-C(58)  | 160.9(3)  |
| O(10)-S(2)-C(53)-C(58)  | -77.5(4)  |
| O(12)-S(2)-C(53)-C(58)  | 42.3(4)   |
| O(11)-S(2)-C(53)-C(54)  | -13.6(4)  |
| O(10)-S(2)-C(53)-C(54)  | 108.0(4)  |
| O(12)-S(2)-C(53)-C(54)  | -132.2(3) |
| C(58)-C(53)-C(54)-C(55) | -2.0(6)   |
| S(2)-C(53)-C(54)-C(55)  | 172.8(4)  |
| C(58)-C(53)-C(54)-N(8)  | 175.5(4)  |
| S(2)-C(53)-C(54)-N(8)   | -9.7(6)   |
| O(13)-N(8)-C(54)-C(55)  | 107.9(5)  |
| O(14)-N(8)-C(54)-C(55)  | -69.0(6)  |
| O(13)-N(8)-C(54)-C(53)  | -69.8(6)  |
| O(14)-N(8)-C(54)-C(53)  | 113.3(5)  |
| C(53)-C(54)-C(55)-C(56) | 1.9(7)    |
| N(8)-C(54)-C(55)-C(56)  | -175.8(4) |

|                         |           |
|-------------------------|-----------|
| C(54)-C(55)-C(56)-C(57) | -0.9(7)   |
| C(54)-C(55)-C(56)-N(9)  | 178.7(4)  |
| O(16)-N(9)-C(56)-C(57)  | -173.8(4) |
| O(15)-N(9)-C(56)-C(57)  | 5.7(6)    |
| O(16)-N(9)-C(56)-C(55)  | 6.5(6)    |
| O(15)-N(9)-C(56)-C(55)  | -173.9(4) |
| C(55)-C(56)-C(57)-C(58) | 0.1(6)    |
| N(9)-C(56)-C(57)-C(58)  | -179.5(4) |
| C(56)-C(57)-C(58)-C(53) | -0.3(6)   |
| C(56)-C(57)-C(58)-N(10) | 179.6(4)  |
| C(54)-C(53)-C(58)-C(57) | 1.1(6)    |
| S(2)-C(53)-C(58)-C(57)  | -173.7(3) |
| C(54)-C(53)-C(58)-N(10) | -178.7(4) |
| S(2)-C(53)-C(58)-N(10)  | 6.5(6)    |
| O(17)-N(10)-C(58)-C(57) | -116.6(5) |
| O(18)-N(10)-C(58)-C(57) | 62.2(5)   |
| O(17)-N(10)-C(58)-C(53) | 63.3(5)   |
| O(18)-N(10)-C(58)-C(53) | -118.0(5) |
| C(18)-N(1)-C(1)-C(13)   | -53.3(5)  |
| C(5)-N(1)-C(1)-C(13)    | -176.2(4) |
| C(18)-N(1)-C(1)-C(2)    | 179.5(3)  |
| C(5)-N(1)-C(1)-C(2)     | 56.6(4)   |
| C(13)-C(1)-C(2)-C(3)    | 177.5(4)  |
| N(1)-C(1)-C(2)-C(3)     | -58.1(4)  |
| C(13)-C(1)-C(2)-C(15)   | -53.2(5)  |
| N(1)-C(1)-C(2)-C(15)    | 71.3(5)   |
| C(1)-C(2)-C(3)-C(4)     | 60.0(5)   |
| C(15)-C(2)-C(3)-C(4)    | -69.5(5)  |
| C(1)-C(2)-C(3)-C(17)    | -174.1(4) |
| C(15)-C(2)-C(3)-C(17)   | 56.4(5)   |
| C(2)-C(3)-C(4)-C(5)     | -59.9(5)  |
| C(17)-C(3)-C(4)-C(5)    | 173.2(4)  |
| C(3)-C(4)-C(5)-C(6)     | -179.8(4) |
| C(3)-C(4)-C(5)-N(1)     | 55.8(5)   |
| C(18)-N(1)-C(5)-C(4)    | -179.3(3) |

|                         |           |
|-------------------------|-----------|
| C(1)-N(1)-C(5)-C(4)     | -54.4(4)  |
| C(18)-N(1)-C(5)-C(6)    | 54.0(4)   |
| C(1)-N(1)-C(5)-C(6)     | 178.9(3)  |
| C(4)-C(5)-C(6)-C(7)     | 123.7(5)  |
| N(1)-C(5)-C(6)-C(7)     | -112.4(5) |
| C(4)-C(5)-C(6)-C(11)    | -53.9(6)  |
| N(1)-C(5)-C(6)-C(11)    | 70.0(5)   |
| C(11)-C(6)-C(7)-C(8)    | -0.8(7)   |
| C(5)-C(6)-C(7)-C(8)     | -178.4(5) |
| C(6)-C(7)-C(8)-C(9)     | -1.0(8)   |
| C(7)-C(8)-C(9)-C(10)    | 2.8(8)    |
| C(7)-C(8)-C(9)-C(12)    | -175.6(5) |
| C(8)-C(9)-C(10)-C(11)   | -2.7(7)   |
| C(12)-C(9)-C(10)-C(11)  | 175.7(5)  |
| C(9)-C(10)-C(11)-C(6)   | 0.8(7)    |
| C(7)-C(6)-C(11)-C(10)   | 0.9(7)    |
| C(5)-C(6)-C(11)-C(10)   | 178.5(4)  |
| C(2)-C(1)-C(13)-C(14)   | -50.5(5)  |
| N(1)-C(1)-C(13)-C(14)   | -175.2(4) |
| C(1)-C(2)-C(15)-C(16)   | 136.8(4)  |
| C(3)-C(2)-C(15)-C(16)   | -96.7(5)  |
| C(1)-N(1)-C(18)-C(23)   | -58.5(5)  |
| C(5)-N(1)-C(18)-C(23)   | 66.0(5)   |
| C(1)-N(1)-C(18)-C(19)   | 124.6(4)  |
| C(5)-N(1)-C(18)-C(19)   | -110.9(4) |
| C(23)-C(18)-C(19)-C(20) | -0.5(7)   |
| N(1)-C(18)-C(19)-C(20)  | 176.3(4)  |
| C(18)-C(19)-C(20)-C(21) | 0.1(7)    |
| C(19)-C(20)-C(21)-C(22) | -0.3(7)   |
| C(20)-C(21)-C(22)-C(23) | 0.7(7)    |
| C(19)-C(18)-C(23)-C(22) | 0.9(7)    |
| N(1)-C(18)-C(23)-C(22)  | -175.8(4) |
| C(21)-C(22)-C(23)-C(18) | -1.0(7)   |
| C(41)-N(3)-C(24)-C(36)  | 57.0(4)   |
| C(28)-N(3)-C(24)-C(36)  | 179.9(3)  |

|                         |           |
|-------------------------|-----------|
| C(41)-N(3)-C(24)-C(25)  | -176.6(3) |
| C(28)-N(3)-C(24)-C(25)  | -53.7(4)  |
| C(36)-C(24)-C(25)-C(38) | 49.7(5)   |
| N(3)-C(24)-C(25)-C(38)  | -72.6(4)  |
| C(36)-C(24)-C(25)-C(26) | 179.1(3)  |
| N(3)-C(24)-C(25)-C(26)  | 56.8(4)   |
| C(38)-C(25)-C(26)-C(27) | 69.0(4)   |
| C(24)-C(25)-C(26)-C(27) | -60.8(4)  |
| C(38)-C(25)-C(26)-C(40) | -54.7(5)  |
| C(24)-C(25)-C(26)-C(40) | 175.5(3)  |
| C(40)-C(26)-C(27)-C(28) | -174.8(4) |
| C(25)-C(26)-C(27)-C(28) | 60.2(5)   |
| C(26)-C(27)-C(28)-C(29) | -176.2(3) |
| C(26)-C(27)-C(28)-N(3)  | -54.3(5)  |
| C(41)-N(3)-C(28)-C(29)  | -59.4(4)  |
| C(24)-N(3)-C(28)-C(29)  | 176.2(3)  |
| C(41)-N(3)-C(28)-C(27)  | 176.1(3)  |
| C(24)-N(3)-C(28)-C(27)  | 51.7(4)   |
| C(27)-C(28)-C(29)-C(34) | -121.3(4) |
| N(3)-C(28)-C(29)-C(34)  | 115.6(4)  |
| C(27)-C(28)-C(29)-C(30) | 58.5(5)   |
| N(3)-C(28)-C(29)-C(30)  | -64.6(5)  |
| C(34)-C(29)-C(30)-C(31) | -1.7(6)   |
| C(28)-C(29)-C(30)-C(31) | 178.5(4)  |
| C(29)-C(30)-C(31)-C(32) | 2.1(6)    |
| C(30)-C(31)-C(32)-C(33) | -0.8(7)   |
| C(30)-C(31)-C(32)-C(35) | 178.6(4)  |
| C(31)-C(32)-C(33)-C(34) | -0.9(7)   |
| C(35)-C(32)-C(33)-C(34) | 179.8(5)  |
| C(32)-C(33)-C(34)-C(29) | 1.3(7)    |
| C(30)-C(29)-C(34)-C(33) | 0.0(7)    |
| C(28)-C(29)-C(34)-C(33) | 179.8(4)  |
| N(3)-C(24)-C(36)-C(37)  | 174.1(4)  |
| C(25)-C(24)-C(36)-C(37) | 50.6(5)   |
| C(26)-C(25)-C(38)-C(39) | 96.6(4)   |

|                         |           |
|-------------------------|-----------|
| C(24)-C(25)-C(38)-C(39) | -136.8(4) |
| C(28)-N(3)-C(41)-C(42)  | -60.2(5)  |
| C(24)-N(3)-C(41)-C(42)  | 65.4(5)   |
| C(28)-N(3)-C(41)-C(46)  | 117.7(4)  |
| C(24)-N(3)-C(41)-C(46)  | -116.7(4) |
| C(46)-C(41)-C(42)-C(43) | -2.3(6)   |
| N(3)-C(41)-C(42)-C(43)  | 175.5(4)  |
| C(41)-C(42)-C(43)-C(44) | 1.2(6)    |
| C(42)-C(43)-C(44)-C(45) | 0.7(7)    |
| C(43)-C(44)-C(45)-C(46) | -1.5(7)   |
| C(42)-C(41)-C(46)-C(45) | 1.4(6)    |
| N(3)-C(41)-C(46)-C(45)  | -176.4(4) |
| C(44)-C(45)-C(46)-C(41) | 0.5(6)    |

---

Symmetry transformations used to generate equivalent atoms:

Table S16. Hydrogen bonds for 007b-19018 [ $\text{\AA}$  and  $^\circ$ ].

| D-H...A              | d(D-H)  | d(H...A) | d(D...A) | $\angle$ (DHA) |
|----------------------|---------|----------|----------|----------------|
| N(3)-H(3A)...O(10)#1 | 1.01(5) | 1.91(5)  | 2.913(5) | 173(4)         |
| N(1)-H(1)...O(12)#1  | 0.93(6) | 2.11(6)  | 3.023(5) | 166(5)         |

---

Symmetry transformations used to generate equivalent atoms:

#1  $x-1/2, -y+3/2, z-1/2$

### **Product 2e**

#### **Crystal Growth**

**2e** (10 mg) and picrylsulfonic acid dihydrate (0.9 equiv) were dissolved in a mixture of toluene (0.5 mL) and methanol (dropwise addition until complete dissolution occurred). Added a few drops of hexanes until the cloud point was reached. Single crystals suitable for X-ray diffraction grew at room temperature over 3-5 days.

#### **Experimental**

Low-temperature diffraction data ( $\omega$ -scans) were collected on a Rigaku MicroMax-007HF diffractometer coupled to a Dectris Pilatus3R detector with Mo K $\alpha$  ( $\lambda = 0.71073 \text{ \AA}$ ) for the structure of 007c-19019. The diffraction images were processed and

scaled using Rigaku Oxford Diffraction software (CrysAlisPro; Rigaku OD: The Woodlands, TX, 2015). The structure was solved with SHELXT and was refined against  $F^2$  on all data by full-matrix least squares with SHELXL (Sheldrick, G. M. Acta Cryst. 2008, A64, 112–122). All non-hydrogen atoms were refined anisotropically. Hydrogen atoms were included in the model at geometrically calculated positions and refined using a riding model. The isotropic displacement parameters of all hydrogen atoms were fixed to 1.2 times the U value of the atoms to which they are linked (1.5 times for methyl groups). The only exception is H1, which was found in the difference map and freely refined. The full numbering scheme of compound 007c-19019 can be found in the full details of the X-ray structure determination (CIF), which is included as Supporting Information. CCDC number 1968319 (007c-19019) contains the supplementary crystallographic data for this paper. These data can be obtained free of charge from The Cambridge Crystallographic Data Center via [www.ccdc.cam.ac.uk/data\\_request/cif](http://www.ccdc.cam.ac.uk/data_request/cif).

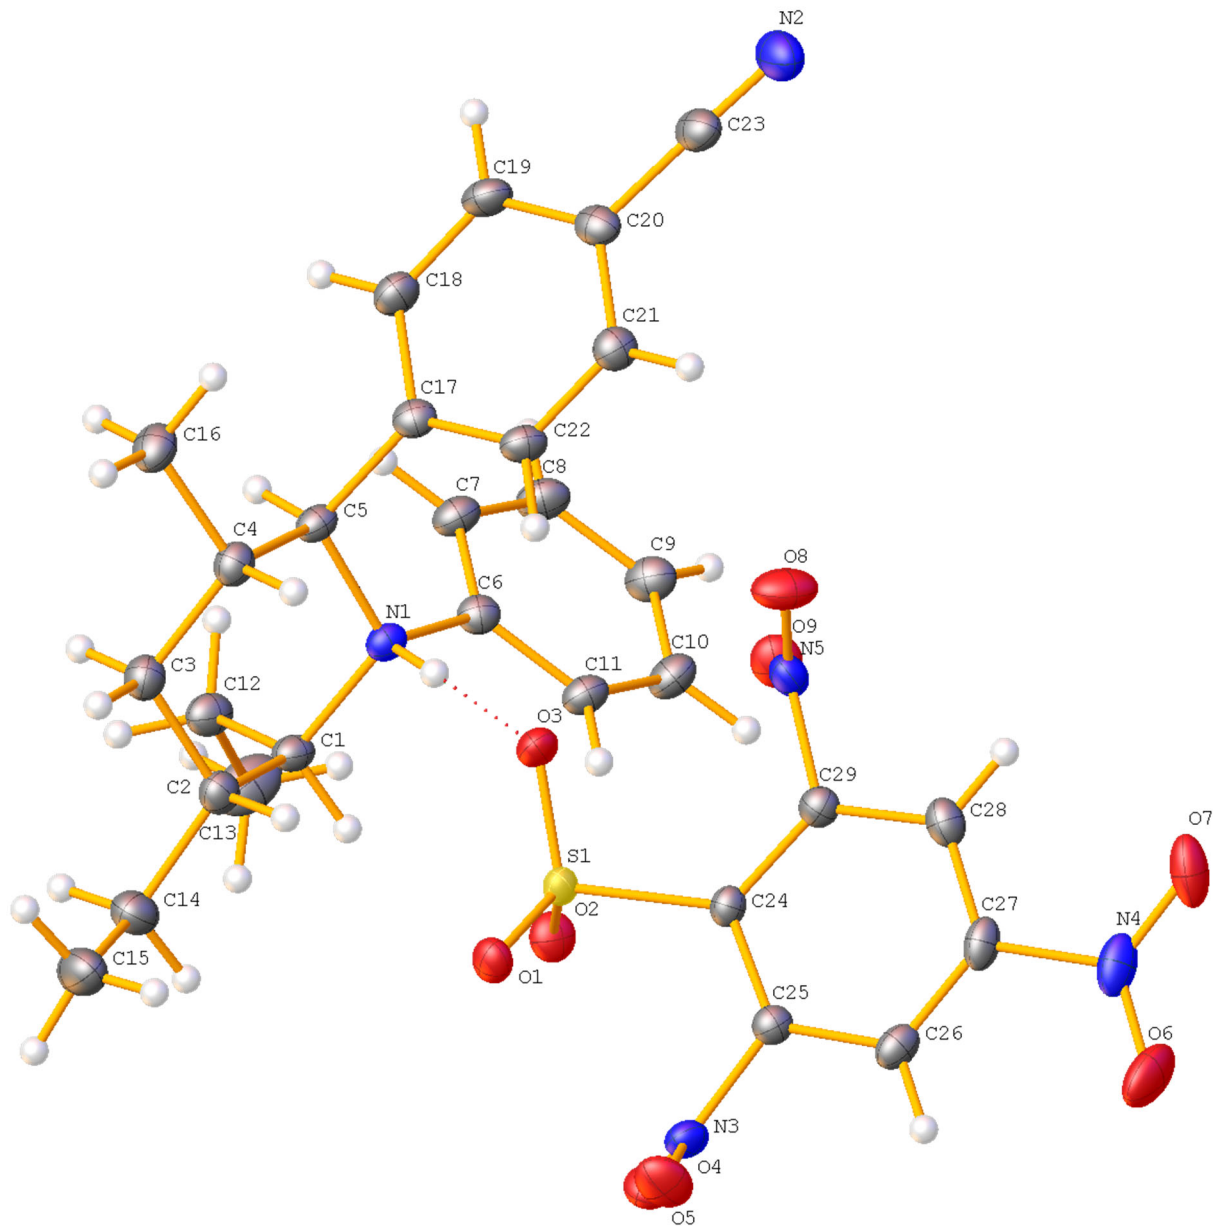

Figure S10. The complete numbering scheme of 007c-19019 with 50% thermal ellipsoid probability levels. The hydrogen atoms are shown as circles for clarity.



Table S17. Crystal data and structure refinement for 007c-19019.

|                                      |                                                                 |                  |
|--------------------------------------|-----------------------------------------------------------------|------------------|
| Identification code                  | 007c-19019                                                      |                  |
| Empirical formula                    | C <sub>29</sub> H <sub>31</sub> N <sub>5</sub> O <sub>9</sub> S |                  |
| Formula weight                       | 625.65                                                          |                  |
| Temperature                          | 93(2) K                                                         |                  |
| Wavelength                           | 0.71073 Å                                                       |                  |
| Crystal system                       | Monoclinic                                                      |                  |
| Space group                          | P2 <sub>1</sub> /c                                              |                  |
| Unit cell dimensions                 | a = 9.7906(4) Å                                                 | α = 90°.         |
|                                      | b = 17.2290(7) Å                                                | β = 102.724(4)°. |
|                                      | c = 18.2219(8) Å                                                | γ = 90°.         |
| Volume                               | 2998.2(2) Å <sup>3</sup>                                        |                  |
| Z                                    | 4                                                               |                  |
| Density (calculated)                 | 1.386 Mg/m <sup>3</sup>                                         |                  |
| Absorption coefficient               | 0.170 mm <sup>-1</sup>                                          |                  |
| F(000)                               | 1312                                                            |                  |
| Crystal size                         | 0.100 x 0.100 x 0.100 mm <sup>3</sup>                           |                  |
| Crystal color and habit              | Yellow Block                                                    |                  |
| Diffractometer                       | Dectris Pilatus 3R                                              |                  |
| Theta range for data collection      | 2.887 to 27.484°.                                               |                  |
| Index ranges                         | -12<=h<=12, -22<=k<=22, -23<=l<=23                              |                  |
| Reflections collected                | 69321                                                           |                  |
| Independent reflections              | 6873 [R(int) = 0.0416]                                          |                  |
| Observed reflections (I > 2sigma(I)) | 5922                                                            |                  |
| Completeness to theta = 25.242°      | 99.8 %                                                          |                  |
| Absorption correction                | Semi-empirical from equivalents                                 |                  |
| Max. and min. transmission           | 1.00000 and 0.75438                                             |                  |
| Solution method                      | SHELXT-2014/5 (Sheldrick, 2014)                                 |                  |
| Refinement method                    | SHELXL-2014/7 (Sheldrick, 2014)                                 |                  |
| Data / restraints / parameters       | 6873 / 0 / 404                                                  |                  |
| Goodness-of-fit on F <sup>2</sup>    | 1.026                                                           |                  |
| Final R indices [I>2sigma(I)]        | R1 = 0.0353, wR2 = 0.0873                                       |                  |
| R indices (all data)                 | R1 = 0.0423, wR2 = 0.0906                                       |                  |
| Largest diff. peak and hole          | 0.399 and -0.342 e.Å <sup>-3</sup>                              |                  |

Table S18. Atomic coordinates ( $\times 10^4$ ) and equivalent isotropic displacement parameters ( $\text{\AA}^2 \times 10^3$ ) for 007c-19019.  $U(\text{eq})$  is defined as one third of the trace of the orthogonalized  $U^{ij}$  tensor.

|       | x       | y        | z        | $U(\text{eq})$ |
|-------|---------|----------|----------|----------------|
| S(1)  | 2328(1) | 1317(1)  | 10110(1) | 17(1)          |
| O(1)  | 2812(1) | 1500(1)  | 10894(1) | 23(1)          |
| O(2)  | 893(1)  | 1530(1)  | 9790(1)  | 25(1)          |
| O(3)  | 3283(1) | 1545(1)  | 9640(1)  | 24(1)          |
| O(4)  | 2162(1) | 171(1)   | 11930(1) | 33(1)          |
| O(5)  | 323(1)  | 580(1)   | 11121(1) | 28(1)          |
| O(6)  | 1972(1) | -2522(1) | 10699(1) | 42(1)          |
| O(7)  | 2917(1) | -2554(1) | 9723(1)  | 36(1)          |
| O(8)  | 4537(1) | 124(1)   | 8939(1)  | 36(1)          |
| O(9)  | 2383(1) | 428(1)   | 8428(1)  | 30(1)          |
| N(3)  | 1443(1) | 242(1)   | 11289(1) | 22(1)          |
| N(4)  | 2448(1) | -2210(1) | 10203(1) | 28(1)          |
| N(5)  | 3289(1) | 162(1)   | 8934(1)  | 22(1)          |
| C(24) | 2349(1) | 264(1)   | 10107(1) | 16(1)          |
| C(25) | 1956(1) | -155(1)  | 10683(1) | 18(1)          |
| C(26) | 1988(1) | -954(1)  | 10734(1) | 21(1)          |
| C(27) | 2451(1) | -1356(1) | 10182(1) | 22(1)          |
| C(28) | 2903(1) | -990(1)  | 9607(1)  | 22(1)          |
| C(29) | 2831(1) | -186(1)  | 9582(1)  | 19(1)          |
| N(1)  | 2202(1) | 2848(1)  | 8562(1)  | 17(1)          |
| N(2)  | 6600(1) | 779(1)   | 6314(1)  | 32(1)          |
| C(1)  | 1321(1) | 3362(1)  | 8982(1)  | 20(1)          |
| C(2)  | 2257(1) | 3564(1)  | 9749(1)  | 21(1)          |
| C(3)  | 3565(1) | 3992(1)  | 9650(1)  | 23(1)          |
| C(4)  | 4419(1) | 3511(1)  | 9203(1)  | 21(1)          |
| C(5)  | 3524(1) | 3253(1)  | 8440(1)  | 18(1)          |
| C(6)  | 1296(1) | 2508(1)  | 7873(1)  | 18(1)          |
| C(7)  | 1174(1) | 2849(1)  | 7174(1)  | 22(1)          |
| C(8)  | 261(1)  | 2523(1)  | 6560(1)  | 25(1)          |
| C(9)  | -506(1) | 1862(1)  | 6645(1)  | 25(1)          |
| C(10) | -354(1) | 1523(1)  | 7351(1)  | 24(1)          |

|       |         |         |          |       |
|-------|---------|---------|----------|-------|
| C(11) | 544(1)  | 1850(1) | 7969(1)  | 21(1) |
| C(12) | 671(1)  | 4057(1) | 8494(1)  | 24(1) |
| C(13) | -901(2) | 3976(1) | 8202(1)  | 41(1) |
| C(14) | 1426(2) | 4000(1) | 10246(1) | 28(1) |
| C(15) | 2228(2) | 4059(1) | 11063(1) | 34(1) |
| C(16) | 5677(1) | 3981(1) | 9077(1)  | 26(1) |
| C(17) | 4292(1) | 2721(1) | 8004(1)  | 19(1) |
| C(18) | 4670(1) | 2995(1) | 7356(1)  | 23(1) |
| C(19) | 5314(2) | 2512(1) | 6928(1)  | 25(1) |
| C(20) | 5593(1) | 1743(1) | 7148(1)  | 22(1) |
| C(21) | 5255(1) | 1466(1) | 7805(1)  | 22(1) |
| C(22) | 4619(1) | 1955(1) | 8231(1)  | 21(1) |
| C(23) | 6164(1) | 1210(1) | 6682(1)  | 24(1) |

---

Table S19. Bond lengths [Å] and angles [°] for 007c-19019.

|             |            |
|-------------|------------|
| S(1)-O(1)   | 1.4378(9)  |
| S(1)-O(2)   | 1.4454(10) |
| S(1)-O(3)   | 1.4539(10) |
| S(1)-C(24)  | 1.8135(12) |
| O(4)-N(3)   | 1.2291(15) |
| O(5)-N(3)   | 1.2197(15) |
| O(6)-N(4)   | 1.2274(17) |
| O(7)-N(4)   | 1.2261(17) |
| O(8)-N(5)   | 1.2219(16) |
| O(9)-N(5)   | 1.2193(15) |
| N(3)-C(25)  | 1.4784(17) |
| N(4)-C(27)  | 1.4735(16) |
| N(5)-C(29)  | 1.4773(17) |
| C(24)-C(29) | 1.3925(18) |
| C(24)-C(25) | 1.3960(17) |
| C(25)-C(26) | 1.3805(18) |
| C(26)-C(27) | 1.377(2)   |

|             |            |
|-------------|------------|
| C(26)-H(26) | 0.9500     |
| C(27)-C(28) | 1.376(2)   |
| C(28)-C(29) | 1.3872(18) |
| C(28)-H(28) | 0.9500     |
| N(1)-C(6)   | 1.4883(16) |
| N(1)-C(5)   | 1.5296(16) |
| N(1)-C(1)   | 1.5505(16) |
| N(1)-H(1)   | 0.892(16)  |
| N(2)-C(23)  | 1.1453(19) |
| C(1)-C(2)   | 1.5334(18) |
| C(1)-C(12)  | 1.5428(18) |
| C(1)-H(1A)  | 1.0000     |
| C(2)-C(3)   | 1.5225(18) |
| C(2)-C(14)  | 1.5397(19) |
| C(2)-H(2)   | 1.0000     |
| C(3)-C(4)   | 1.5326(18) |
| C(3)-H(3A)  | 0.9900     |
| C(3)-H(3B)  | 0.9900     |
| C(4)-C(16)  | 1.5324(18) |
| C(4)-C(5)   | 1.5377(18) |
| C(4)-H(4)   | 1.0000     |
| C(5)-C(17)  | 1.5172(18) |
| C(5)-H(5)   | 1.0000     |
| C(6)-C(11)  | 1.3840(18) |
| C(6)-C(7)   | 1.3842(18) |
| C(7)-C(8)   | 1.3881(19) |
| C(7)-H(7)   | 0.9500     |
| C(8)-C(9)   | 1.390(2)   |
| C(8)-H(8)   | 0.9500     |
| C(9)-C(10)  | 1.3898(19) |
| C(9)-H(9)   | 0.9500     |
| C(10)-C(11) | 1.3872(19) |
| C(10)-H(10) | 0.9500     |
| C(11)-H(11) | 0.9500     |
| C(12)-C(13) | 1.520(2)   |

|                 |            |
|-----------------|------------|
| C(12)-H(12A)    | 0.9900     |
| C(12)-H(12B)    | 0.9900     |
| C(13)-H(13A)    | 0.9800     |
| C(13)-H(13B)    | 0.9800     |
| C(13)-H(13C)    | 0.9800     |
| C(14)-C(15)     | 1.526(2)   |
| C(14)-H(14A)    | 0.9900     |
| C(14)-H(14B)    | 0.9900     |
| C(15)-H(15A)    | 0.9800     |
| C(15)-H(15B)    | 0.9800     |
| C(15)-H(15C)    | 0.9800     |
| C(16)-H(16A)    | 0.9800     |
| C(16)-H(16B)    | 0.9800     |
| C(16)-H(16C)    | 0.9800     |
| C(17)-C(18)     | 1.3942(18) |
| C(17)-C(22)     | 1.3984(18) |
| C(18)-C(19)     | 1.384(2)   |
| C(18)-H(18)     | 0.9500     |
| C(19)-C(20)     | 1.393(2)   |
| C(19)-H(19)     | 0.9500     |
| C(20)-C(21)     | 1.3936(19) |
| C(20)-C(23)     | 1.4443(19) |
| C(21)-C(22)     | 1.3836(19) |
| C(21)-H(21)     | 0.9500     |
| C(22)-H(22)     | 0.9500     |
| O(1)-S(1)-O(2)  | 115.05(6)  |
| O(1)-S(1)-O(3)  | 114.36(6)  |
| O(2)-S(1)-O(3)  | 112.79(6)  |
| O(1)-S(1)-C(24) | 102.80(6)  |
| O(2)-S(1)-C(24) | 105.26(6)  |
| O(3)-S(1)-C(24) | 105.03(6)  |
| O(5)-N(3)-O(4)  | 125.56(12) |
| O(5)-N(3)-C(25) | 117.87(11) |
| O(4)-N(3)-C(25) | 116.48(11) |
| O(7)-N(4)-O(6)  | 125.20(12) |

|                   |            |
|-------------------|------------|
| O(7)-N(4)-C(27)   | 117.45(12) |
| O(6)-N(4)-C(27)   | 117.35(13) |
| O(9)-N(5)-O(8)    | 125.77(12) |
| O(9)-N(5)-C(29)   | 117.28(11) |
| O(8)-N(5)-C(29)   | 116.86(11) |
| C(29)-C(24)-C(25) | 114.83(11) |
| C(29)-C(24)-S(1)  | 124.39(10) |
| C(25)-C(24)-S(1)  | 120.64(10) |
| C(26)-C(25)-C(24) | 124.11(12) |
| C(26)-C(25)-N(3)  | 114.68(11) |
| C(24)-C(25)-N(3)  | 121.20(11) |
| C(27)-C(26)-C(25) | 117.25(12) |
| C(27)-C(26)-H(26) | 121.4      |
| C(25)-C(26)-H(26) | 121.4      |
| C(28)-C(27)-C(26) | 122.60(12) |
| C(28)-C(27)-N(4)  | 118.76(12) |
| C(26)-C(27)-N(4)  | 118.64(12) |
| C(27)-C(28)-C(29) | 117.42(12) |
| C(27)-C(28)-H(28) | 121.3      |
| C(29)-C(28)-H(28) | 121.3      |
| C(28)-C(29)-C(24) | 123.73(12) |
| C(28)-C(29)-N(5)  | 114.18(11) |
| C(24)-C(29)-N(5)  | 122.09(11) |
| C(6)-N(1)-C(5)    | 115.04(10) |
| C(6)-N(1)-C(1)    | 110.37(9)  |
| C(5)-N(1)-C(1)    | 113.05(10) |
| C(6)-N(1)-H(1)    | 105.6(10)  |
| C(5)-N(1)-H(1)    | 105.9(10)  |
| C(1)-N(1)-H(1)    | 106.1(10)  |
| C(2)-C(1)-C(12)   | 115.89(11) |
| C(2)-C(1)-N(1)    | 107.06(10) |
| C(12)-C(1)-N(1)   | 111.30(10) |
| C(2)-C(1)-H(1A)   | 107.4      |
| C(12)-C(1)-H(1A)  | 107.4      |
| N(1)-C(1)-H(1A)   | 107.4      |

|                  |            |
|------------------|------------|
| C(3)-C(2)-C(1)   | 110.58(11) |
| C(3)-C(2)-C(14)  | 113.59(11) |
| C(1)-C(2)-C(14)  | 111.05(11) |
| C(3)-C(2)-H(2)   | 107.1      |
| C(1)-C(2)-H(2)   | 107.1      |
| C(14)-C(2)-H(2)  | 107.1      |
| C(2)-C(3)-C(4)   | 111.85(11) |
| C(2)-C(3)-H(3A)  | 109.2      |
| C(4)-C(3)-H(3A)  | 109.2      |
| C(2)-C(3)-H(3B)  | 109.2      |
| C(4)-C(3)-H(3B)  | 109.2      |
| H(3A)-C(3)-H(3B) | 107.9      |
| C(16)-C(4)-C(3)  | 110.15(11) |
| C(16)-C(4)-C(5)  | 109.51(11) |
| C(3)-C(4)-C(5)   | 111.57(10) |
| C(16)-C(4)-H(4)  | 108.5      |
| C(3)-C(4)-H(4)   | 108.5      |
| C(5)-C(4)-H(4)   | 108.5      |
| C(17)-C(5)-N(1)  | 109.46(10) |
| C(17)-C(5)-C(4)  | 113.50(10) |
| N(1)-C(5)-C(4)   | 109.42(10) |
| C(17)-C(5)-H(5)  | 108.1      |
| N(1)-C(5)-H(5)   | 108.1      |
| C(4)-C(5)-H(5)   | 108.1      |
| C(11)-C(6)-C(7)  | 121.62(12) |
| C(11)-C(6)-N(1)  | 116.76(11) |
| C(7)-C(6)-N(1)   | 121.59(11) |
| C(6)-C(7)-C(8)   | 118.67(12) |
| C(6)-C(7)-H(7)   | 120.7      |
| C(8)-C(7)-H(7)   | 120.7      |
| C(7)-C(8)-C(9)   | 120.59(13) |
| C(7)-C(8)-H(8)   | 119.7      |
| C(9)-C(8)-H(8)   | 119.7      |
| C(10)-C(9)-C(8)  | 119.81(13) |
| C(10)-C(9)-H(9)  | 120.1      |

|                     |            |
|---------------------|------------|
| C(8)-C(9)-H(9)      | 120.1      |
| C(11)-C(10)-C(9)    | 120.06(13) |
| C(11)-C(10)-H(10)   | 120.0      |
| C(9)-C(10)-H(10)    | 120.0      |
| C(6)-C(11)-C(10)    | 119.25(12) |
| C(6)-C(11)-H(11)    | 120.4      |
| C(10)-C(11)-H(11)   | 120.4      |
| C(13)-C(12)-C(1)    | 112.77(12) |
| C(13)-C(12)-H(12A)  | 109.0      |
| C(1)-C(12)-H(12A)   | 109.0      |
| C(13)-C(12)-H(12B)  | 109.0      |
| C(1)-C(12)-H(12B)   | 109.0      |
| H(12A)-C(12)-H(12B) | 107.8      |
| C(12)-C(13)-H(13A)  | 109.5      |
| C(12)-C(13)-H(13B)  | 109.5      |
| H(13A)-C(13)-H(13B) | 109.5      |
| C(12)-C(13)-H(13C)  | 109.5      |
| H(13A)-C(13)-H(13C) | 109.5      |
| H(13B)-C(13)-H(13C) | 109.5      |
| C(15)-C(14)-C(2)    | 112.39(12) |
| C(15)-C(14)-H(14A)  | 109.1      |
| C(2)-C(14)-H(14A)   | 109.1      |
| C(15)-C(14)-H(14B)  | 109.1      |
| C(2)-C(14)-H(14B)   | 109.1      |
| H(14A)-C(14)-H(14B) | 107.9      |
| C(14)-C(15)-H(15A)  | 109.5      |
| C(14)-C(15)-H(15B)  | 109.5      |
| H(15A)-C(15)-H(15B) | 109.5      |
| C(14)-C(15)-H(15C)  | 109.5      |
| H(15A)-C(15)-H(15C) | 109.5      |
| H(15B)-C(15)-H(15C) | 109.5      |
| C(4)-C(16)-H(16A)   | 109.5      |
| C(4)-C(16)-H(16B)   | 109.5      |
| H(16A)-C(16)-H(16B) | 109.5      |
| C(4)-C(16)-H(16C)   | 109.5      |



|                     |            |
|---------------------|------------|
| H(16A)-C(16)-H(16C) | 109.5      |
| H(16B)-C(16)-H(16C) | 109.5      |
| C(18)-C(17)-C(22)   | 118.93(12) |
| C(18)-C(17)-C(5)    | 119.54(11) |
| C(22)-C(17)-C(5)    | 121.52(11) |
| C(19)-C(18)-C(17)   | 120.82(12) |
| C(19)-C(18)-H(18)   | 119.6      |
| C(17)-C(18)-H(18)   | 119.6      |
| C(18)-C(19)-C(20)   | 119.60(12) |
| C(18)-C(19)-H(19)   | 120.2      |
| C(20)-C(19)-H(19)   | 120.2      |
| C(19)-C(20)-C(21)   | 120.27(12) |
| C(19)-C(20)-C(23)   | 120.77(13) |
| C(21)-C(20)-C(23)   | 118.88(12) |
| C(22)-C(21)-C(20)   | 119.66(12) |
| C(22)-C(21)-H(21)   | 120.2      |
| C(20)-C(21)-H(21)   | 120.2      |
| C(21)-C(22)-C(17)   | 120.66(12) |
| C(21)-C(22)-H(22)   | 119.7      |
| C(17)-C(22)-H(22)   | 119.7      |
| N(2)-C(23)-C(20)    | 178.88(15) |

---

Symmetry transformations used to generate equivalent atoms:

Table S20. Anisotropic displacement parameters ( $\text{\AA}^2 \times 10^3$ ) for 007c-19019. The anisotropic displacement factor exponent takes the form:  $-2\pi^2 [h^2 a^{*2} U^{11} + \dots + 2 h k a^* b^* U^{12}]$

|      | U <sup>11</sup> | U <sup>22</sup> | U <sup>33</sup> | U <sup>23</sup> | U <sup>13</sup> | U <sup>12</sup> |
|------|-----------------|-----------------|-----------------|-----------------|-----------------|-----------------|
| S(1) | 22(1)           | 13(1)           | 16(1)           | 1(1)            | 5(1)            | 0(1)            |
| O(1) | 31(1)           | 21(1)           | 17(1)           | -2(1)           | 5(1)            | -2(1)           |
| O(2) | 26(1)           | 22(1)           | 26(1)           | 4(1)            | 3(1)            | 5(1)            |
| O(3) | 32(1)           | 19(1)           | 24(1)           | 2(1)            | 13(1)           | -3(1)           |
| O(4) | 46(1)           | 35(1)           | 18(1)           | 7(1)            | 8(1)            | 10(1)           |
| O(5) | 22(1)           | 29(1)           | 36(1)           | 1(1)            | 12(1)           | 3(1)            |

|       |       |       |       |        |       |       |
|-------|-------|-------|-------|--------|-------|-------|
| O(6)  | 39(1) | 20(1) | 67(1) | 15(1)  | 15(1) | 2(1)  |
| O(7)  | 48(1) | 19(1) | 34(1) | -6(1)  | -7(1) | 7(1)  |
| O(8)  | 29(1) | 44(1) | 39(1) | 12(1)  | 19(1) | 8(1)  |
| O(9)  | 37(1) | 29(1) | 20(1) | 5(1)   | 2(1)  | 3(1)  |
| N(3)  | 26(1) | 19(1) | 22(1) | 5(1)   | 10(1) | 0(1)  |
| N(4)  | 25(1) | 16(1) | 40(1) | 3(1)   | -4(1) | 2(1)  |
| N(5)  | 29(1) | 18(1) | 19(1) | -1(1)  | 8(1)  | 2(1)  |
| C(24) | 16(1) | 14(1) | 18(1) | 1(1)   | 2(1)  | 0(1)  |
| C(25) | 17(1) | 18(1) | 18(1) | 2(1)   | 3(1)  | 1(1)  |
| C(26) | 18(1) | 19(1) | 25(1) | 6(1)   | 2(1)  | 0(1)  |
| C(27) | 20(1) | 14(1) | 28(1) | 2(1)   | -2(1) | 1(1)  |
| C(28) | 22(1) | 20(1) | 23(1) | -3(1)  | 1(1)  | 3(1)  |
| C(29) | 19(1) | 19(1) | 18(1) | 1(1)   | 3(1)  | 0(1)  |
| N(1)  | 16(1) | 17(1) | 18(1) | 4(1)   | 3(1)  | 1(1)  |
| N(2)  | 32(1) | 34(1) | 33(1) | -10(1) | 10(1) | -7(1) |
| C(1)  | 19(1) | 20(1) | 22(1) | 3(1)   | 8(1)  | 1(1)  |
| C(2)  | 24(1) | 18(1) | 21(1) | 2(1)   | 5(1)  | 1(1)  |
| C(3)  | 23(1) | 20(1) | 24(1) | -1(1)  | 5(1)  | -1(1) |
| C(4)  | 19(1) | 18(1) | 23(1) | 2(1)   | 3(1)  | 0(1)  |
| C(5)  | 15(1) | 19(1) | 22(1) | 4(1)   | 5(1)  | -1(1) |
| C(6)  | 15(1) | 21(1) | 19(1) | 1(1)   | 3(1)  | 1(1)  |
| C(7)  | 18(1) | 24(1) | 24(1) | 5(1)   | 5(1)  | -1(1) |
| C(8)  | 22(1) | 32(1) | 20(1) | 7(1)   | 4(1)  | 0(1)  |
| C(9)  | 21(1) | 32(1) | 22(1) | 1(1)   | 2(1)  | -2(1) |
| C(10) | 21(1) | 25(1) | 27(1) | 5(1)   | 4(1)  | -4(1) |
| C(11) | 18(1) | 22(1) | 22(1) | 5(1)   | 5(1)  | 0(1)  |
| C(12) | 23(1) | 22(1) | 27(1) | 6(1)   | 7(1)  | 5(1)  |
| C(13) | 22(1) | 42(1) | 58(1) | 21(1)  | 5(1)  | 8(1)  |
| C(14) | 32(1) | 27(1) | 29(1) | -1(1)  | 13(1) | 2(1)  |
| C(15) | 40(1) | 35(1) | 31(1) | -8(1)  | 14(1) | -9(1) |
| C(16) | 20(1) | 23(1) | 35(1) | -1(1)  | 5(1)  | -2(1) |
| C(17) | 14(1) | 22(1) | 19(1) | 2(1)   | 3(1)  | 0(1)  |
| C(18) | 23(1) | 22(1) | 23(1) | 5(1)   | 5(1)  | -1(1) |
| C(19) | 26(1) | 30(1) | 21(1) | 3(1)   | 9(1)  | -5(1) |
| C(20) | 16(1) | 27(1) | 21(1) | -3(1)  | 4(1)  | -2(1) |

|       |       |       |       |       |      |       |
|-------|-------|-------|-------|-------|------|-------|
| C(21) | 20(1) | 22(1) | 23(1) | 2(1)  | 4(1) | 2(1)  |
| C(22) | 19(1) | 24(1) | 20(1) | 5(1)  | 6(1) | 1(1)  |
| C(23) | 22(1) | 28(1) | 23(1) | -3(1) | 6(1) | -6(1) |

Table S21. Hydrogen coordinates ( $\times 10^4$ ) and isotropic displacement parameters ( $\text{Å}^2 \times 10^3$ ) for 007c-19019.

|        | x     | y     | z     | U(eq) |
|--------|-------|-------|-------|-------|
| H(26)  | 1702  | -1217 | 11133 | 25    |
| H(28)  | 3252  | -1277 | 9243  | 26    |
| H(1A)  | 532   | 3036  | 9076  | 24    |
| H(2)   | 2573  | 3062  | 10007 | 25    |
| H(3A)  | 4155  | 4115  | 10151 | 27    |
| H(3B)  | 3288  | 4488  | 9384  | 27    |
| H(4)   | 4775  | 3038  | 9502  | 25    |
| H(5)   | 3232  | 3728  | 8129  | 22    |
| H(7)   | 1704  | 3298  | 7115  | 26    |
| H(8)   | 159   | 2752  | 6077  | 30    |
| H(9)   | -1132 | 1644  | 6223  | 30    |
| H(10)  | -865  | 1067  | 7409  | 29    |
| H(11)  | 642   | 1624  | 8454  | 25    |
| H(12A) | 863   | 4538  | 8797  | 28    |
| H(12B) | 1125  | 4108  | 8062  | 28    |
| H(13A) | -1256 | 4426  | 7889  | 62    |
| H(13B) | -1361 | 3948  | 8628  | 62    |
| H(13C) | -1099 | 3501  | 7901  | 62    |
| H(14A) | 1206  | 4529  | 10041 | 34    |
| H(14B) | 529   | 3727  | 10227 | 34    |
| H(15A) | 3077  | 4369  | 11089 | 52    |
| H(15B) | 2488  | 3538  | 11260 | 52    |
| H(15C) | 1636  | 4308  | 11363 | 52    |
| H(16A) | 5344  | 4444  | 8779  | 39    |
| H(16B) | 6235  | 3662  | 8808  | 39    |

|        |          |         |         |       |
|--------|----------|---------|---------|-------|
| H(16C) | 6256     | 4138    | 9565    | 39    |
| H(18)  | 4484     | 3519    | 7207    | 28    |
| H(19)  | 5565     | 2703    | 6487    | 30    |
| H(21)  | 5462     | 945     | 7959    | 26    |
| H(22)  | 4401     | 1769    | 8682    | 25    |
| H(1)   | 2497(16) | 2447(9) | 8865(9) | 19(4) |

---

Table S22. Torsion angles [°] for 007c-19019.

|                         |             |
|-------------------------|-------------|
| O(1)-S(1)-C(24)-C(29)   | -137.50(11) |
| O(2)-S(1)-C(24)-C(29)   | 101.70(11)  |
| O(3)-S(1)-C(24)-C(29)   | -17.57(12)  |
| O(1)-S(1)-C(24)-C(25)   | 38.01(11)   |
| O(2)-S(1)-C(24)-C(25)   | -82.79(11)  |
| O(3)-S(1)-C(24)-C(25)   | 157.94(10)  |
| C(29)-C(24)-C(25)-C(26) | -1.85(18)   |
| S(1)-C(24)-C(25)-C(26)  | -177.77(10) |
| C(29)-C(24)-C(25)-N(3)  | 179.09(11)  |
| S(1)-C(24)-C(25)-N(3)   | 3.18(16)    |
| O(5)-N(3)-C(25)-C(26)   | -112.20(13) |
| O(4)-N(3)-C(25)-C(26)   | 64.56(15)   |
| O(5)-N(3)-C(25)-C(24)   | 66.94(16)   |
| O(4)-N(3)-C(25)-C(24)   | -116.30(13) |
| C(24)-C(25)-C(26)-C(27) | 0.61(19)    |
| N(3)-C(25)-C(26)-C(27)  | 179.72(11)  |
| C(25)-C(26)-C(27)-C(28) | 1.63(19)    |
| C(25)-C(26)-C(27)-N(4)  | -177.72(11) |
| O(7)-N(4)-C(27)-C(28)   | 3.43(18)    |
| O(6)-N(4)-C(27)-C(28)   | -176.36(12) |
| O(7)-N(4)-C(27)-C(26)   | -177.19(12) |
| O(6)-N(4)-C(27)-C(26)   | 3.02(18)    |
| C(26)-C(27)-C(28)-C(29) | -2.4(2)     |
| N(4)-C(27)-C(28)-C(29)  | 176.97(11)  |

|                         |             |
|-------------------------|-------------|
| C(27)-C(28)-C(29)-C(24) | 1.0(2)      |
| C(27)-C(28)-C(29)-N(5)  | -177.99(11) |
| C(25)-C(24)-C(29)-C(28) | 1.02(18)    |
| S(1)-C(24)-C(29)-C(28)  | 176.76(10)  |
| C(25)-C(24)-C(29)-N(5)  | 179.91(11)  |
| S(1)-C(24)-C(29)-N(5)   | -4.34(18)   |
| O(9)-N(5)-C(29)-C(28)   | 106.92(13)  |
| O(8)-N(5)-C(29)-C(28)   | -69.66(15)  |
| O(9)-N(5)-C(29)-C(24)   | -72.07(16)  |
| O(8)-N(5)-C(29)-C(24)   | 111.34(14)  |
| C(6)-N(1)-C(1)-C(2)     | 169.65(10)  |
| C(5)-N(1)-C(1)-C(2)     | -59.91(12)  |
| C(6)-N(1)-C(1)-C(12)    | -62.78(13)  |
| C(5)-N(1)-C(1)-C(12)    | 67.67(13)   |
| C(12)-C(1)-C(2)-C(3)    | -65.63(14)  |
| N(1)-C(1)-C(2)-C(3)     | 59.21(13)   |
| C(12)-C(1)-C(2)-C(14)   | 61.42(15)   |
| N(1)-C(1)-C(2)-C(14)    | -173.75(10) |
| C(1)-C(2)-C(3)-C(4)     | -58.76(14)  |
| C(14)-C(2)-C(3)-C(4)    | 175.61(11)  |
| C(2)-C(3)-C(4)-C(16)    | 176.73(11)  |
| C(2)-C(3)-C(4)-C(5)     | 54.90(14)   |
| C(6)-N(1)-C(5)-C(17)    | -50.05(13)  |
| C(1)-N(1)-C(5)-C(17)    | -178.10(10) |
| C(6)-N(1)-C(5)-C(4)     | -175.01(10) |
| C(1)-N(1)-C(5)-C(4)     | 56.94(13)   |
| C(16)-C(4)-C(5)-C(17)   | 62.46(14)   |
| C(3)-C(4)-C(5)-C(17)    | -175.33(10) |
| C(16)-C(4)-C(5)-N(1)    | -174.95(10) |
| C(3)-C(4)-C(5)-N(1)     | -52.75(13)  |
| C(5)-N(1)-C(6)-C(11)    | 148.91(11)  |
| C(1)-N(1)-C(6)-C(11)    | -81.71(13)  |
| C(5)-N(1)-C(6)-C(7)     | -33.30(16)  |
| C(1)-N(1)-C(6)-C(7)     | 96.08(13)   |
| C(11)-C(6)-C(7)-C(8)    | 0.7(2)      |

|                         |             |
|-------------------------|-------------|
| N(1)-C(6)-C(7)-C(8)     | -177.01(12) |
| C(6)-C(7)-C(8)-C(9)     | -0.6(2)     |
| C(7)-C(8)-C(9)-C(10)    | -0.3(2)     |
| C(8)-C(9)-C(10)-C(11)   | 1.0(2)      |
| C(7)-C(6)-C(11)-C(10)   | 0.0(2)      |
| N(1)-C(6)-C(11)-C(10)   | 177.83(11)  |
| C(9)-C(10)-C(11)-C(6)   | -0.9(2)     |
| C(2)-C(1)-C(12)-C(13)   | -129.48(14) |
| N(1)-C(1)-C(12)-C(13)   | 107.90(14)  |
| C(3)-C(2)-C(14)-C(15)   | -66.71(15)  |
| C(1)-C(2)-C(14)-C(15)   | 167.91(12)  |
| N(1)-C(5)-C(17)-C(18)   | 127.92(12)  |
| C(4)-C(5)-C(17)-C(18)   | -109.52(13) |
| N(1)-C(5)-C(17)-C(22)   | -51.30(15)  |
| C(4)-C(5)-C(17)-C(22)   | 71.26(15)   |
| C(22)-C(17)-C(18)-C(19) | 2.24(19)    |
| C(5)-C(17)-C(18)-C(19)  | -177.00(12) |
| C(17)-C(18)-C(19)-C(20) | -0.2(2)     |
| C(18)-C(19)-C(20)-C(21) | -1.5(2)     |
| C(18)-C(19)-C(20)-C(23) | 175.17(12)  |
| C(19)-C(20)-C(21)-C(22) | 1.2(2)      |
| C(23)-C(20)-C(21)-C(22) | -175.58(12) |
| C(20)-C(21)-C(22)-C(17) | 0.9(2)      |
| C(18)-C(17)-C(22)-C(21) | -2.59(19)   |
| C(5)-C(17)-C(22)-C(21)  | 176.64(12)  |

---

Symmetry transformations used to generate equivalent atoms:

Table S23. Hydrogen bonds for 007c-19019 [Å and °].

| D-H...A          | d(D-H)    | d(H...A)  | d(D...A)   | <(DHA)    |
|------------------|-----------|-----------|------------|-----------|
| N(1)-H(1)...O(3) | 0.892(16) | 2.126(16) | 3.0173(14) | 176.1(14) |

Symmetry transformations used to generate equivalent atoms:

## Intermediate 5

### Crystal Growth

**5** (10 mg) and picrylsulfonic acid dihydrate (0.9 equiv) were dissolved in a mixture of toluene (0.25 mL) and DCM (0.25 mL) in a 1-dram vial. Methanol was added dropwise addition until complete dissolution occurred. A few drops of hexanes were added until the cloud point was reached. Single crystals suitable for X-ray diffraction grew at room temperature over 3-5 days.

### Experimental

Low-temperature diffraction data ( $\omega$ -scans) were collected on a Rigaku MicroMax-007HF diffractometer coupled to a Saturn994+ CCD detector with Cu K $\alpha$  ( $\lambda = 1.54178 \text{ \AA}$ ) for the structure of 007a-20018. The diffraction images were processed and scaled using Rigaku Oxford Diffraction software (CrysAlisPro; Rigaku OD: The Woodlands, TX, 2015). This data was refined as a 2-component twin. The fractional volume contribution of the minor twin component was freely refined to a converged value of 0.2331(16). The structure was solved with SHELXT and was refined against  $F^2$  on all data by full-matrix least squares with SHELXL (Sheldrick, G. M. Acta Cryst. 2008, A64, 112–122). All non-hydrogen atoms were refined anisotropically. Hydrogen atoms were included in the model at geometrically calculated positions and refined using a riding model. The isotropic displacement parameters of all hydrogen atoms were fixed to 1.2 times the U value of the atoms to which they are linked (1.5 times for methyl groups). The only exception is H1, which was found in the difference map and freely refined. The toluene crystallized near the inversion center. The best model was obtained by suppressing the special position constraints and placing a whole model toluene (see Guzei, I. A. (2014). J. Appl. Crystallogr. 47, 806-809). The model was then allowed to freely refine at half occupancy. The full numbering scheme of compound 007a-20018 can be found in the full details of the X-ray structure determination (CIF), which is included as Supporting Information. CCDC number 1989517 (007a-20018) contains the supplementary crystallographic data for this paper. These data can be obtained free of charge from The Cambridge Crystallographic Data Center via [www.ccdc.cam.ac.uk/data\\_request/cif](http://www.ccdc.cam.ac.uk/data_request/cif).

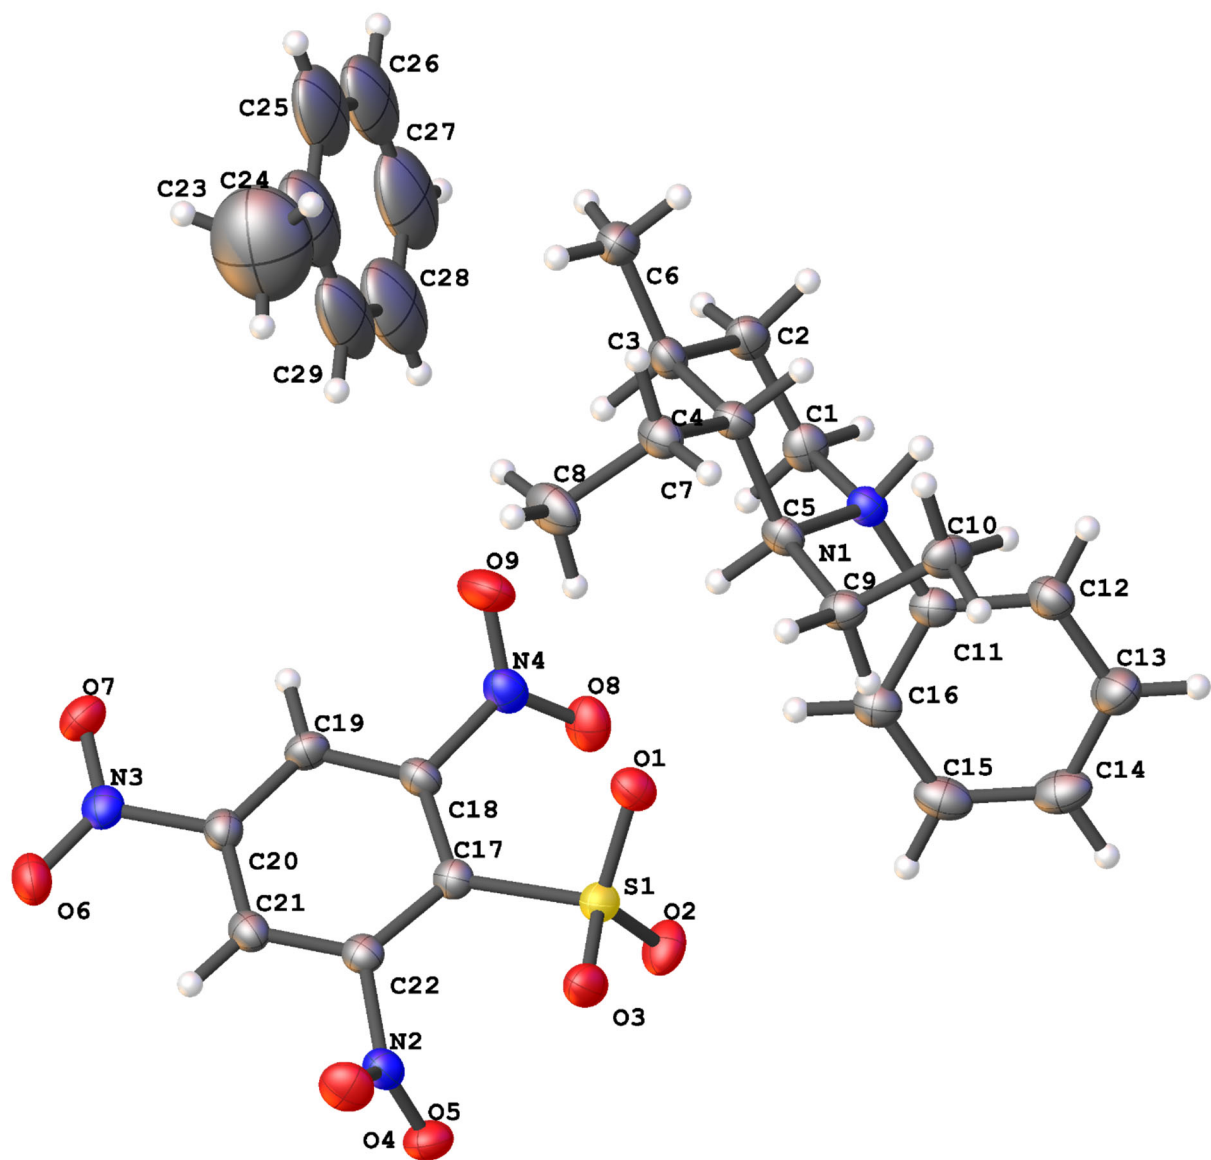

Figure S12. The complete numbering scheme of 007a-20018 with 50% thermal ellipsoid probability levels. The hydrogen atoms are shown as circles for clarity.

Table S24. Crystal data and structure refinement for 007a-20018.

|                     |                                                                    |
|---------------------|--------------------------------------------------------------------|
| Identification code | 007a-20018                                                         |
| Empirical formula   | C <sub>25.50</sub> H <sub>32</sub> N <sub>4</sub> O <sub>9</sub> S |
| Formula weight      | 570.61                                                             |
| Temperature         | 93(2) K                                                            |
| Wavelength          | 1.54184 Å                                                          |
| Crystal system      | Monoclinic                                                         |
| Space group         | P2 <sub>1</sub> /c                                                 |



Unit cell dimensions      a = 8.09190(10) Å       $\alpha = 90^\circ$ .  
                                          b = 21.6444(3) Å       $\beta = 90.1140(10)^\circ$ .  
                                          c = 15.4490(2) Å       $\gamma = 90^\circ$ .  
 Volume                              2705.80(6) Å<sup>3</sup>  
 Z                                              4  
 Density (calculated)              1.401 Mg/m<sup>3</sup>  
 Absorption coefficient            1.583 mm<sup>-1</sup>  
 F(000)                                  1204  
 Crystal size                        0.220 x 0.180 x 0.160 mm<sup>3</sup>  
 Crystal color and habit            ? ?  
 Diffractometer                    Rigaku Saturn 944+ CCD  
 Theta range for data collection 3.515 to 66.639°.  
 Index ranges                        -9 ≤ h ≤ 9, -25 ≤ k ≤ 25, 0 ≤ l ≤ 18  
 Reflections collected              4779  
 Independent reflections        4779 [R(int) = 0.1818]  
 Observed reflections (I > 2σ(I)) 4483  
 Completeness to theta = 66.639° 100.0 %  
 Absorption correction            None  
 Solution method                  SHELXT-2014/5 (Sheldrick, 2014)  
 Refinement method               SHELXL-2014/7 (Sheldrick, 2014)  
 Data / restraints / parameters 4779 / 87 / 384  
 Goodness-of-fit on F2              1.112  
 Final R indices [I > 2σ(I)] R1 = 0.0581, wR2 = 0.1486  
 R indices (all data)              R1 = 0.0612, wR2 = 0.1509  
 Largest diff. peak and hole 0.500 and -0.469 e.Å<sup>-3</sup>

Table S25. Atomic coordinates (x 10<sup>4</sup>) and equivalent isotropic displacement parameters (Å<sup>2</sup> × 10<sup>3</sup>) for 007a-20018. U(eq) is defined as one third of the trace of the orthogonalized U<sub>ij</sub> tensor.

|      | x       | y       | z        | U(eq) |
|------|---------|---------|----------|-------|
| S(1) | 2250(1) | 8728(1) | 10189(1) | 24(1) |
| O(1) | 2968(3) | 8464(1) | 9427(2)  | 29(1) |
| O(2) | 561(3)  | 8558(1) | 10345(2) | 35(1) |
| O(3) | 3277(4) | 8680(1) | 10960(2) | 32(1) |

|       |          |           |          |        |
|-------|----------|-----------|----------|--------|
| O(4)  | 4356(3)  | 9888(1)   | 11782(2) | 37(1)  |
| O(5)  | 1719(3)  | 9730(1)   | 11884(2) | 34(1)  |
| O(6)  | 3264(3)  | 11804(1)  | 9907(2)  | 34(1)  |
| O(7)  | 2508(3)  | 11621(1)  | 8587(2)  | 33(1)  |
| O(8)  | 212(3)   | 9047(1)   | 8542(2)  | 36(1)  |
| O(9)  | 2153(4)  | 9406(2)   | 7727(2)  | 48(1)  |
| N(2)  | 2968(4)  | 9843(1)   | 11479(2) | 27(1)  |
| N(3)  | 2833(4)  | 11461(1)  | 9327(2)  | 27(1)  |
| N(4)  | 1414(4)  | 9373(2)   | 8408(2)  | 30(1)  |
| C(17) | 2251(4)  | 9552(2)   | 9950(2)  | 22(1)  |
| C(18) | 1975(4)  | 9780(2)   | 9116(2)  | 24(1)  |
| C(19) | 2173(4)  | 10395(2)  | 8889(2)  | 25(1)  |
| C(20) | 2676(4)  | 10800(2)  | 9529(2)  | 25(1)  |
| C(21) | 2982(4)  | 10611(2)  | 10361(2) | 26(1)  |
| C(22) | 2758(4)  | 9994(2)   | 10554(2) | 24(1)  |
| N(1)  | 1891(4)  | 7304(1)   | 7204(2)  | 24(1)  |
| C(1)  | 1032(5)  | 7755(2)   | 6611(2)  | 30(1)  |
| C(2)  | 2172(5)  | 7959(2)   | 5892(2)  | 30(1)  |
| C(3)  | 3815(5)  | 8215(2)   | 6226(2)  | 26(1)  |
| C(4)  | 4630(4)  | 7742(2)   | 6844(2)  | 24(1)  |
| C(5)  | 3464(4)  | 7591(2)   | 7601(2)  | 24(1)  |
| C(6)  | 4920(5)  | 8379(2)   | 5470(2)  | 33(1)  |
| C(7)  | 6334(5)  | 7955(2)   | 7162(2)  | 29(1)  |
| C(8)  | 6324(5)  | 8554(2)   | 7676(3)  | 41(1)  |
| C(9)  | 4164(5)  | 7164(2)   | 8293(2)  | 28(1)  |
| C(10) | 4681(5)  | 6524(2)   | 7991(2)  | 32(1)  |
| C(11) | 731(4)   | 7059(2)   | 7856(2)  | 25(1)  |
| C(12) | 262(5)   | 6451(2)   | 7774(2)  | 31(1)  |
| C(13) | -786(5)  | 6197(2)   | 8384(3)  | 39(1)  |
| C(14) | -1359(5) | 6557(2)   | 9057(3)  | 38(1)  |
| C(15) | -892(5)  | 7171(2)   | 9119(3)  | 35(1)  |
| C(16) | 168(5)   | 7428(2)   | 8517(2)  | 30(1)  |
| C(23) | 7570(30) | 10071(14) | 5665(17) | 163(9) |
| C(24) | 5835(13) | 10014(6)  | 5266(9)  | 102(4) |
| C(25) | 5465(15) | 9999(5)   | 4388(8)  | 96(4)  |

|       |          |         |         |        |
|-------|----------|---------|---------|--------|
| C(26) | 3842(18) | 9914(4) | 4116(6) | 95(4)  |
| C(27) | 2590(13) | 9844(4) | 4723(9) | 106(4) |
| C(28) | 2961(14) | 9859(4) | 5601(8) | 102(4) |
| C(29) | 4583(17) | 9944(5) | 5873(6) | 88(4)  |

---

Table S26. Bond lengths [Å] and angles [°] for 007a-20018.

---

|             |          |
|-------------|----------|
| S(1)-O(1)   | 1.433(3) |
| S(1)-O(2)   | 1.436(3) |
| S(1)-O(3)   | 1.454(3) |
| S(1)-C(17)  | 1.821(3) |
| O(4)-N(2)   | 1.220(4) |
| O(5)-N(2)   | 1.215(4) |
| O(6)-N(3)   | 1.215(4) |
| O(7)-N(3)   | 1.222(4) |
| O(8)-N(4)   | 1.219(4) |
| O(9)-N(4)   | 1.214(4) |
| N(2)-C(22)  | 1.475(4) |
| N(3)-C(20)  | 1.470(5) |
| N(4)-C(18)  | 1.474(5) |
| C(17)-C(18) | 1.397(5) |
| C(17)-C(22) | 1.398(5) |
| C(18)-C(19) | 1.388(5) |
| C(19)-C(20) | 1.381(5) |
| C(19)-H(19) | 0.9500   |
| C(20)-C(21) | 1.370(5) |
| C(21)-C(22) | 1.380(5) |
| C(21)-H(21) | 0.9500   |
| N(1)-C(11)  | 1.477(5) |
| N(1)-C(1)   | 1.509(4) |
| N(1)-C(5)   | 1.542(4) |
| N(1)-H(1)   | 0.96(5)  |
| C(1)-C(2)   | 1.510(5) |

|              |          |
|--------------|----------|
| C(1)-H(1A)   | 0.9900   |
| C(1)-H(1B)   | 0.9900   |
| C(2)-C(3)    | 1.529(5) |
| C(2)-H(2A)   | 0.9900   |
| C(2)-H(2B)   | 0.9900   |
| C(3)-C(6)    | 1.515(5) |
| C(3)-C(4)    | 1.547(5) |
| C(3)-H(3)    | 1.0000   |
| C(4)-C(7)    | 1.534(5) |
| C(4)-C(5)    | 1.538(5) |
| C(4)-H(4)    | 1.0000   |
| C(5)-C(9)    | 1.522(5) |
| C(5)-H(5)    | 1.0000   |
| C(6)-H(6A)   | 0.9800   |
| C(6)-H(6B)   | 0.9800   |
| C(6)-H(6C)   | 0.9800   |
| C(7)-C(8)    | 1.521(6) |
| C(7)-H(7A)   | 0.9900   |
| C(7)-H(7B)   | 0.9900   |
| C(8)-H(8A)   | 0.9800   |
| C(8)-H(8B)   | 0.9800   |
| C(8)-H(8C)   | 0.9800   |
| C(9)-C(10)   | 1.520(5) |
| C(9)-H(9A)   | 0.9900   |
| C(9)-H(9B)   | 0.9900   |
| C(10)-H(10A) | 0.9800   |
| C(10)-H(10B) | 0.9800   |
| C(10)-H(10C) | 0.9800   |
| C(11)-C(16)  | 1.375(5) |
| C(11)-C(12)  | 1.375(6) |
| C(12)-C(13)  | 1.382(6) |
| C(12)-H(12)  | 0.9500   |
| C(13)-C(14)  | 1.381(6) |
| C(13)-H(13)  | 0.9500   |
| C(14)-C(15)  | 1.385(6) |

|                 |            |
|-----------------|------------|
| C(14)-H(14)     | 0.9500     |
| C(15)-C(16)     | 1.383(6)   |
| C(15)-H(15)     | 0.9500     |
| C(16)-H(16)     | 0.9500     |
| C(23)-C(24)     | 1.54(3)    |
| C(23)-H(23A)    | 0.9800     |
| C(23)-H(23B)    | 0.9800     |
| C(23)-H(23C)    | 0.9800     |
| C(24)-C(25)     | 1.3900     |
| C(24)-C(29)     | 1.3900     |
| C(25)-C(26)     | 1.3900     |
| C(25)-H(25)     | 0.9500     |
| C(26)-C(27)     | 1.3900     |
| C(26)-H(26)     | 0.9500     |
| C(27)-C(28)     | 1.3900     |
| C(27)-H(27)     | 0.9500     |
| C(28)-C(29)     | 1.3900     |
| C(28)-H(28)     | 0.9500     |
| C(29)-H(29)     | 0.9500     |
|                 |            |
| O(1)-S(1)-O(2)  | 115.02(17) |
| O(1)-S(1)-O(3)  | 114.36(15) |
| O(2)-S(1)-O(3)  | 112.80(17) |
| O(1)-S(1)-C(17) | 102.85(15) |
| O(2)-S(1)-C(17) | 106.58(16) |
| O(3)-S(1)-C(17) | 103.66(15) |
| O(5)-N(2)-O(4)  | 125.8(3)   |
| O(5)-N(2)-C(22) | 116.7(3)   |
| O(4)-N(2)-C(22) | 117.3(3)   |
| O(6)-N(3)-O(7)  | 125.2(3)   |
| O(6)-N(3)-C(20) | 117.6(3)   |
| O(7)-N(3)-C(20) | 117.2(3)   |
| O(9)-N(4)-O(8)  | 125.1(3)   |
| O(9)-N(4)-C(18) | 117.2(3)   |
| O(8)-N(4)-C(18) | 117.7(3)   |

|                   |          |
|-------------------|----------|
| C(18)-C(17)-C(22) | 114.8(3) |
| C(18)-C(17)-S(1)  | 122.2(3) |
| C(22)-C(17)-S(1)  | 122.4(3) |
| C(19)-C(18)-C(17) | 123.6(3) |
| C(19)-C(18)-N(4)  | 114.9(3) |
| C(17)-C(18)-N(4)  | 121.5(3) |
| C(20)-C(19)-C(18) | 117.5(3) |
| C(20)-C(19)-H(19) | 121.2    |
| C(18)-C(19)-H(19) | 121.2    |
| C(21)-C(20)-C(19) | 122.3(3) |
| C(21)-C(20)-N(3)  | 118.3(3) |
| C(19)-C(20)-N(3)  | 119.3(3) |
| C(20)-C(21)-C(22) | 117.8(3) |
| C(20)-C(21)-H(21) | 121.1    |
| C(22)-C(21)-H(21) | 121.1    |
| C(21)-C(22)-C(17) | 123.8(3) |
| C(21)-C(22)-N(2)  | 114.1(3) |
| C(17)-C(22)-N(2)  | 121.9(3) |
| C(11)-N(1)-C(1)   | 110.7(3) |
| C(11)-N(1)-C(5)   | 113.5(3) |
| C(1)-N(1)-C(5)    | 111.0(3) |
| C(11)-N(1)-H(1)   | 108(3)   |
| C(1)-N(1)-H(1)    | 102(3)   |
| C(5)-N(1)-H(1)    | 111(3)   |
| N(1)-C(1)-C(2)    | 110.8(3) |
| N(1)-C(1)-H(1A)   | 109.5    |
| C(2)-C(1)-H(1A)   | 109.5    |
| N(1)-C(1)-H(1B)   | 109.5    |
| C(2)-C(1)-H(1B)   | 109.5    |
| H(1A)-C(1)-H(1B)  | 108.1    |
| C(1)-C(2)-C(3)    | 112.9(3) |
| C(1)-C(2)-H(2A)   | 109.0    |
| C(3)-C(2)-H(2A)   | 109.0    |
| C(1)-C(2)-H(2B)   | 109.0    |
| C(3)-C(2)-H(2B)   | 109.0    |

|                  |          |
|------------------|----------|
| H(2A)-C(2)-H(2B) | 107.8    |
| C(6)-C(3)-C(2)   | 109.8(3) |
| C(6)-C(3)-C(4)   | 112.3(3) |
| C(2)-C(3)-C(4)   | 109.7(3) |
| C(6)-C(3)-H(3)   | 108.3    |
| C(2)-C(3)-H(3)   | 108.3    |
| C(4)-C(3)-H(3)   | 108.3    |
| C(7)-C(4)-C(5)   | 111.9(3) |
| C(7)-C(4)-C(3)   | 112.3(3) |
| C(5)-C(4)-C(3)   | 110.3(3) |
| C(7)-C(4)-H(4)   | 107.3    |
| C(5)-C(4)-H(4)   | 107.3    |
| C(3)-C(4)-H(4)   | 107.3    |
| C(9)-C(5)-C(4)   | 115.7(3) |
| C(9)-C(5)-N(1)   | 109.9(3) |
| C(4)-C(5)-N(1)   | 106.9(3) |
| C(9)-C(5)-H(5)   | 108.0    |
| C(4)-C(5)-H(5)   | 108.0    |
| N(1)-C(5)-H(5)   | 108.0    |
| C(3)-C(6)-H(6A)  | 109.5    |
| C(3)-C(6)-H(6B)  | 109.5    |
| H(6A)-C(6)-H(6B) | 109.5    |
| C(3)-C(6)-H(6C)  | 109.5    |
| H(6A)-C(6)-H(6C) | 109.5    |
| H(6B)-C(6)-H(6C) | 109.5    |
| C(8)-C(7)-C(4)   | 114.7(3) |
| C(8)-C(7)-H(7A)  | 108.6    |
| C(4)-C(7)-H(7A)  | 108.6    |
| C(8)-C(7)-H(7B)  | 108.6    |
| C(4)-C(7)-H(7B)  | 108.6    |
| H(7A)-C(7)-H(7B) | 107.6    |
| C(7)-C(8)-H(8A)  | 109.5    |
| C(7)-C(8)-H(8B)  | 109.5    |
| H(8A)-C(8)-H(8B) | 109.5    |
| C(7)-C(8)-H(8C)  | 109.5    |

|                     |          |
|---------------------|----------|
| H(8A)-C(8)-H(8C)    | 109.5    |
| H(8B)-C(8)-H(8C)    | 109.5    |
| C(10)-C(9)-C(5)     | 116.1(3) |
| C(10)-C(9)-H(9A)    | 108.3    |
| C(5)-C(9)-H(9A)     | 108.3    |
| C(10)-C(9)-H(9B)    | 108.3    |
| C(5)-C(9)-H(9B)     | 108.3    |
| H(9A)-C(9)-H(9B)    | 107.4    |
| C(9)-C(10)-H(10A)   | 109.5    |
| C(9)-C(10)-H(10B)   | 109.5    |
| H(10A)-C(10)-H(10B) | 109.5    |
| C(9)-C(10)-H(10C)   | 109.5    |
| H(10A)-C(10)-H(10C) | 109.5    |
| H(10B)-C(10)-H(10C) | 109.5    |
| C(16)-C(11)-C(12)   | 122.2(4) |
| C(16)-C(11)-N(1)    | 120.7(3) |
| C(12)-C(11)-N(1)    | 117.1(3) |
| C(11)-C(12)-C(13)   | 119.1(4) |
| C(11)-C(12)-H(12)   | 120.5    |
| C(13)-C(12)-H(12)   | 120.5    |
| C(14)-C(13)-C(12)   | 119.8(4) |
| C(14)-C(13)-H(13)   | 120.1    |
| C(12)-C(13)-H(13)   | 120.1    |
| C(13)-C(14)-C(15)   | 120.1(4) |
| C(13)-C(14)-H(14)   | 120.0    |
| C(15)-C(14)-H(14)   | 120.0    |
| C(16)-C(15)-C(14)   | 120.5(4) |
| C(16)-C(15)-H(15)   | 119.7    |
| C(14)-C(15)-H(15)   | 119.7    |
| C(11)-C(16)-C(15)   | 118.3(4) |
| C(11)-C(16)-H(16)   | 120.9    |
| C(15)-C(16)-H(16)   | 120.9    |
| C(24)-C(23)-H(23A)  | 109.5    |
| C(24)-C(23)-H(23B)  | 109.5    |
| H(23A)-C(23)-H(23B) | 109.5    |



|                     |           |
|---------------------|-----------|
| C(24)-C(23)-H(23C)  | 109.5     |
| H(23A)-C(23)-H(23C) | 109.5     |
| H(23B)-C(23)-H(23C) | 109.5     |
| C(25)-C(24)-C(29)   | 120.0     |
| C(25)-C(24)-C(23)   | 126.0(13) |
| C(29)-C(24)-C(23)   | 113.9(13) |
| C(24)-C(25)-C(26)   | 120.0     |
| C(24)-C(25)-H(25)   | 120.0     |
| C(26)-C(25)-H(25)   | 120.0     |
| C(25)-C(26)-C(27)   | 120.0     |
| C(25)-C(26)-H(26)   | 120.0     |
| C(27)-C(26)-H(26)   | 120.0     |
| C(28)-C(27)-C(26)   | 120.0     |
| C(28)-C(27)-H(27)   | 120.0     |
| C(26)-C(27)-H(27)   | 120.0     |
| C(29)-C(28)-C(27)   | 120.0     |
| C(29)-C(28)-H(28)   | 120.0     |
| C(27)-C(28)-H(28)   | 120.0     |
| C(28)-C(29)-C(24)   | 120.0     |
| C(28)-C(29)-H(29)   | 120.0     |
| C(24)-C(29)-H(29)   | 120.0     |

---

Symmetry transformations used to generate equivalent atoms:

Table S27. Anisotropic displacement parameters ( $\text{\AA}^2 \times 10^3$ ) for 007a-20018. The anisotropic displacement factor exponent takes the form:  $-2\pi^2 [ h^2 a^{*2} U_{11} + \dots + 2 h k a^* b^* U_{12} ]$

|      | U11   | U22   | U33   | U23   | U13   |
|------|-------|-------|-------|-------|-------|
|      | U12   |       |       |       |       |
| S(1) | 25(1) | 23(1) | 23(1) | 0(1)  | 1(1)  |
|      | 1(1)  |       |       |       |       |
| O(1) | 32(1) | 28(1) | 26(1) | -3(1) | -2(1) |
|      | 4(1)  |       |       |       |       |
| O(2) | 26(1) | 31(1) | 49(2) | 3(1)  | 9(1)  |

|       |        |       |       |        |        |
|-------|--------|-------|-------|--------|--------|
|       | -4(1)  |       |       |        |        |
| O(3)  | 44(2)  | 26(1) | 27(1) | 3(1)   | 1(1)   |
|       | 4(1)   |       |       |        |        |
| O(4)  | 36(2)  | 44(2) | 30(1) | 0(1)   | -11(1) |
|       | 1(1)   |       |       |        |        |
| O(5)  | 38(2)  | 36(2) | 26(1) | 1(1)   | 8(1)   |
|       | 0(1)   |       |       |        |        |
| O(6)  | 36(2)  | 25(1) | 41(2) | -4(1)  | 2(1)   |
|       | -4(1)  |       |       |        |        |
| O(7)  | 37(2)  | 32(1) | 30(1) | 8(1)   | 2(1)   |
|       | -2(1)  |       |       |        |        |
| O(8)  | 33(2)  | 33(2) | 41(2) | -1(1)  | -10(1) |
|       | -4(1)  |       |       |        |        |
| O(9)  | 62(2)  | 55(2) | 28(2) | -12(1) | 5(2)   |
|       | -12(2) |       |       |        |        |
| N(2)  | 33(2)  | 24(2) | 25(2) | -3(1)  | -1(1)  |
|       | 1(1)   |       |       |        |        |
| N(3)  | 23(2)  | 28(2) | 30(2) | 0(1)   | 4(1)   |
|       | -1(1)  |       |       |        |        |
| N(4)  | 33(2)  | 29(2) | 27(2) | -2(1)  | -6(1)  |
|       | 1(1)   |       |       |        |        |
| C(17) | 17(2)  | 25(2) | 24(2) | 0(1)   | 0(1)   |
|       | 0(1)   |       |       |        |        |
| C(18) | 23(2)  | 28(2) | 22(2) | -5(1)  | -2(1)  |
|       | -1(2)  |       |       |        |        |
| C(19) | 24(2)  | 30(2) | 21(2) | 4(1)   | -1(1)  |
|       | 1(2)   |       |       |        |        |
| C(20) | 24(2)  | 23(2) | 27(2) | -1(1)  | 3(1)   |
|       | -1(1)  |       |       |        |        |
| C(21) | 22(2)  | 27(2) | 27(2) | -5(1)  | 3(2)   |
|       | -2(2)  |       |       |        |        |
| C(22) | 19(2)  | 27(2) | 25(2) | -2(1)  | 2(1)   |
|       | 1(2)   |       |       |        |        |
| N(1)  | 25(2)  | 24(2) | 23(1) | -2(1)  | -2(1)  |
|       | 1(1)   |       |       |        |        |

|       |                  |         |         |        |         |
|-------|------------------|---------|---------|--------|---------|
| C(1)  | 28(2)<br>3(2)    | 29(2)   | 31(2)   | 2(2)   | -8(2)   |
| C(2)  | 35(2)<br>2(2)    | 28(2)   | 26(2)   | 1(2)   | -6(2)   |
| C(3)  | 31(2)<br>-1(2)   | 23(2)   | 26(2)   | -4(2)  | -3(2)   |
| C(4)  | 25(2)<br>0(2)    | 26(2)   | 22(2)   | -2(1)  | -1(1)   |
| C(5)  | 21(2)<br>-2(2)   | 29(2)   | 22(2)   | -5(2)  | -4(1)   |
| C(6)  | 42(2)<br>-2(2)   | 29(2)   | 28(2)   | -1(2)  | 3(2)    |
| C(7)  | 24(2)<br>-4(2)   | 34(2)   | 30(2)   | -6(2)  | 1(2)    |
| C(8)  | 31(2)<br>-10(2)  | 51(3)   | 42(2)   | -17(2) | -2(2)   |
| C(9)  | 24(2)<br>-2(2)   | 36(2)   | 23(2)   | 0(2)   | 0(1)    |
| C(10) | 33(2)<br>6(2)    | 35(2)   | 27(2)   | 6(2)   | -1(2)   |
| C(11) | 19(2)<br>1(2)    | 34(2)   | 23(2)   | -1(2)  | -1(1)   |
| C(12) | 30(2)<br>-3(2)   | 35(2)   | 28(2)   | -5(2)  | -1(2)   |
| C(13) | 38(2)<br>-9(2)   | 43(2)   | 35(2)   | 0(2)   | 5(2)    |
| C(14) | 27(2)<br>-3(2)   | 56(3)   | 31(2)   | 3(2)   | 4(2)    |
| C(15) | 28(2)<br>8(2)    | 48(3)   | 29(2)   | -7(2)  | -1(2)   |
| C(16) | 27(2)<br>1(2)    | 36(2)   | 28(2)   | -2(2)  | -1(2)   |
| C(23) | 163(11)<br>2(11) | 150(20) | 174(16) | -1(15) | -47(11) |
| C(24) | 143(9)           | 42(7)   | 121(8)  | -11(6) | -33(7)  |

|       |         |       |        |        |        |
|-------|---------|-------|--------|--------|--------|
|       | 17(7)   |       |        |        |        |
| C(25) | 155(10) | 27(7) | 107(8) | -4(6)  | -23(7) |
|       | 20(7)   |       |        |        |        |
| C(26) | 157(10) | 28(6) | 100(8) | -8(6)  | -32(7) |
|       | 20(7)   |       |        |        |        |
| C(27) | 148(10) | 34(6) | 136(8) | -10(6) | -37(8) |
|       | 30(7)   |       |        |        |        |
| C(28) | 145(9)  | 39(6) | 123(8) | -16(6) | -29(7) |
|       | 31(7)   |       |        |        |        |
| C(29) | 147(9)  | 31(7) | 86(8)  | -8(5)  | -35(7) |
|       | 21(6)   |       |        |        |        |

---

Table S28. Hydrogen coordinates ( x 104) and isotropic displacement parameters ( $\text{\AA}^2 \times 10^3$ ) for 007a-20018.

|       | x        | y        | z        | U(eq)  |
|-------|----------|----------|----------|--------|
| H(19) | 1971     | 10534    | 8315     | 30     |
| H(21) | 3336     | 10896    | 10791    | 31     |
| H(1)  | 2170(50) | 6980(20) | 6810(30) | 35(11) |
| H(1A) | 672      | 8120     | 6947     | 35     |
| H(1B) | 38       | 7558     | 6358     | 35     |
| H(2A) | 1612     | 8281     | 5544     | 36     |
| H(2B) | 2395     | 7603     | 5508     | 36     |
| H(3)  | 3584     | 8601     | 6560     | 32     |
| H(4)  | 4796     | 7351     | 6509     | 29     |
| H(5)  | 3147     | 7989     | 7885     | 29     |
| H(6A) | 5294     | 7999     | 5185     | 50     |
| H(6B) | 5879     | 8611     | 5679     | 50     |
| H(6C) | 4300     | 8632     | 5055     | 50     |
| H(7A) | 6816     | 7625     | 7528     | 35     |

|        |       |       |      |     |
|--------|-------|-------|------|-----|
| H(7B)  | 7064  | 8008  | 6654 | 35  |
| H(8A)  | 5904  | 8889  | 7311 | 62  |
| H(8B)  | 7451  | 8651  | 7866 | 62  |
| H(8C)  | 5610  | 8507  | 8183 | 62  |
| H(9A)  | 5137  | 7368  | 8557 | 33  |
| H(9B)  | 3324  | 7116  | 8753 | 33  |
| H(10A) | 5531  | 6563  | 7543 | 48  |
| H(10B) | 3720  | 6307  | 7752 | 48  |
| H(10C) | 5126  | 6291  | 8482 | 48  |
| H(12)  | 653   | 6209  | 7304 | 37  |
| H(13)  | -1110 | 5777  | 8339 | 47  |
| H(14)  | -2075 | 6384  | 9478 | 46  |
| H(15)  | -1302 | 7418  | 9579 | 42  |
| H(16)  | 499   | 7848  | 8560 | 36  |
| H(23A) | 7490  | 10071 | 6298 | 244 |
| H(23B) | 8254  | 9721  | 5479 | 244 |
| H(23C) | 8086  | 10458 | 5473 | 244 |
| H(25)  | 6321  | 10047 | 3973 | 116 |
| H(26)  | 3589  | 9903  | 3515 | 114 |
| H(27)  | 1481  | 9786  | 4537 | 128 |
| H(28)  | 2105  | 9812  | 6016 | 123 |
| H(29)  | 4836  | 9955  | 6474 | 106 |

---

Table S29. Torsion angles [°] for 007a-20018.

|                         |           |
|-------------------------|-----------|
| O(1)-S(1)-C(17)-C(18)   | 35.4(3)   |
| O(2)-S(1)-C(17)-C(18)   | -85.9(3)  |
| O(3)-S(1)-C(17)-C(18)   | 154.8(3)  |
| O(1)-S(1)-C(17)-C(22)   | -135.1(3) |
| O(2)-S(1)-C(17)-C(22)   | 103.6(3)  |
| O(3)-S(1)-C(17)-C(22)   | -15.7(3)  |
| C(22)-C(17)-C(18)-C(19) | -0.3(5)   |
| S(1)-C(17)-C(18)-C(19)  | -171.5(3) |

|                         |           |
|-------------------------|-----------|
| C(22)-C(17)-C(18)-N(4)  | -179.2(3) |
| S(1)-C(17)-C(18)-N(4)   | 9.6(5)    |
| O(9)-N(4)-C(18)-C(19)   | 49.4(5)   |
| O(8)-N(4)-C(18)-C(19)   | -128.1(4) |
| O(9)-N(4)-C(18)-C(17)   | -131.6(4) |
| O(8)-N(4)-C(18)-C(17)   | 50.8(5)   |
| C(17)-C(18)-C(19)-C(20) | 0.2(6)    |
| N(4)-C(18)-C(19)-C(20)  | 179.1(3)  |
| C(18)-C(19)-C(20)-C(21) | 0.3(5)    |
| C(18)-C(19)-C(20)-N(3)  | -177.4(3) |
| O(6)-N(3)-C(20)-C(21)   | 1.6(5)    |
| O(7)-N(3)-C(20)-C(21)   | -177.9(3) |
| O(6)-N(3)-C(20)-C(19)   | 179.4(3)  |
| O(7)-N(3)-C(20)-C(19)   | -0.2(5)   |
| C(19)-C(20)-C(21)-C(22) | -0.6(5)   |
| N(3)-C(20)-C(21)-C(22)  | 177.1(3)  |
| C(20)-C(21)-C(22)-C(17) | 0.4(5)    |
| C(20)-C(21)-C(22)-N(2)  | -174.7(3) |
| C(18)-C(17)-C(22)-C(21) | 0.0(5)    |
| S(1)-C(17)-C(22)-C(21)  | 171.2(3)  |
| C(18)-C(17)-C(22)-N(2)  | 174.8(3)  |
| S(1)-C(17)-C(22)-N(2)   | -14.1(5)  |
| O(5)-N(2)-C(22)-C(21)   | 106.6(4)  |
| O(4)-N(2)-C(22)-C(21)   | -68.2(4)  |
| O(5)-N(2)-C(22)-C(17)   | -68.7(4)  |
| O(4)-N(2)-C(22)-C(17)   | 116.6(4)  |
| C(11)-N(1)-C(1)-C(2)    | -174.5(3) |
| C(5)-N(1)-C(1)-C(2)     | 58.4(4)   |
| N(1)-C(1)-C(2)-C(3)     | -53.9(4)  |
| C(1)-C(2)-C(3)-C(6)     | 177.2(3)  |
| C(1)-C(2)-C(3)-C(4)     | 53.3(4)   |
| C(6)-C(3)-C(4)-C(7)     | 54.3(4)   |
| C(2)-C(3)-C(4)-C(7)     | 176.7(3)  |
| C(6)-C(3)-C(4)-C(5)     | 179.9(3)  |
| C(2)-C(3)-C(4)-C(5)     | -57.7(4)  |

|                         |            |
|-------------------------|------------|
| C(7)-C(4)-C(5)-C(9)     | -50.0(4)   |
| C(3)-C(4)-C(5)-C(9)     | -175.9(3)  |
| C(7)-C(4)-C(5)-N(1)     | -172.7(3)  |
| C(3)-C(4)-C(5)-N(1)     | 61.4(4)    |
| C(11)-N(1)-C(5)-C(9)    | 46.2(4)    |
| C(1)-N(1)-C(5)-C(9)     | 171.8(3)   |
| C(11)-N(1)-C(5)-C(4)    | 172.5(3)   |
| C(1)-N(1)-C(5)-C(4)     | -61.9(4)   |
| C(5)-C(4)-C(7)-C(8)     | -63.5(4)   |
| C(3)-C(4)-C(7)-C(8)     | 61.3(4)    |
| C(4)-C(5)-C(9)-C(10)    | -60.3(4)   |
| N(1)-C(5)-C(9)-C(10)    | 60.8(4)    |
| C(1)-N(1)-C(11)-C(16)   | -71.3(4)   |
| C(5)-N(1)-C(11)-C(16)   | 54.4(4)    |
| C(1)-N(1)-C(11)-C(12)   | 109.3(4)   |
| C(5)-N(1)-C(11)-C(12)   | -125.0(3)  |
| C(16)-C(11)-C(12)-C(13) | -1.2(6)    |
| N(1)-C(11)-C(12)-C(13)  | 178.2(3)   |
| C(11)-C(12)-C(13)-C(14) | 0.7(6)     |
| C(12)-C(13)-C(14)-C(15) | 0.3(6)     |
| C(13)-C(14)-C(15)-C(16) | -0.9(6)    |
| C(12)-C(11)-C(16)-C(15) | 0.6(6)     |
| N(1)-C(11)-C(16)-C(15)  | -178.8(3)  |
| C(14)-C(15)-C(16)-C(11) | 0.5(6)     |
| C(29)-C(24)-C(25)-C(26) | 0.0        |
| C(23)-C(24)-C(25)-C(26) | 176.7(18)  |
| C(24)-C(25)-C(26)-C(27) | 0.0        |
| C(25)-C(26)-C(27)-C(28) | 0.0        |
| C(26)-C(27)-C(28)-C(29) | 0.0        |
| C(27)-C(28)-C(29)-C(24) | 0.0        |
| C(25)-C(24)-C(29)-C(28) | 0.0        |
| C(23)-C(24)-C(29)-C(28) | -177.1(16) |

---

Symmetry transformations used to generate equivalent atoms:

Table S30. Hydrogen bonds for 007a-20018 [ $\text{\AA}$  and  $^\circ$ ].

| D-H...A            | d(D-H)  | d(H...A) | d(D...A) | $\angle(\text{DHA})$ |
|--------------------|---------|----------|----------|----------------------|
| N(1)-H(1)...O(3)#1 | 0.96(5) | 2.13(5)  | 3.082(4) | 169(4)               |

Symmetry transformations used to generate equivalent atoms:

#1  $x, -y+3/2, z-1/2$

## Product 2v

### Crystal Growth

**2v** (10 mg) and picrylsulfonic acid dihydrate (0.9 equiv) were dissolved in a mixture of toluene (0.25 mL) and DCM (0.25 mL) in a 1-dram vial. Methanol was added dropwise until complete dissolution occurred. A few drops of hexanes were added until the cloud point was reached. Single crystals suitable for X-ray diffraction grew at room temperature over 3-5 days.

### Experimental

Low-temperature diffraction data ( $\omega$ -scans) were collected on a Rigaku MicroMax-007HF diffractometer coupled to a Saturn994+ CCD detector with Cu  $K\alpha$  ( $\lambda = 1.54178 \text{ \AA}$ ) for the structure of 007b-20020. The diffraction images were processed and scaled using Rigaku Oxford Diffraction software (CrysAlisPro; Rigaku OD: The Woodlands, TX, 2015). The structure was solved with SHELXT and was refined against  $F^2$  on all data by full-matrix least squares with SHELXL (Sheldrick, G. M. Acta Cryst. 2008, A64, 112–122). All non-hydrogen atoms were refined anisotropically. Hydrogen atoms were included in the model at geometrically calculated positions and refined using a riding model. The isotropic displacement parameters of all hydrogen atoms were fixed to 1.2 times the U value of the atoms to which they are linked (1.5 times for methyl groups). The isopropyl and phenyl group are disordered over two positions. The phenyl site occupancies were freely refined to 0.88/0.12. The chemically equivalent C-C distances were restrained to be similar. Due to the small electron density, the thermal parameters of the minor component were constrained to be identical to the major. The site occupancies of the isopropyl were refined to 0.82/0.12, and a similar approach was used for refining the atomic and thermal parameters. The full numbering scheme of compound 007b-20020 can be found in the full details of the X-ray structure determination (CIF), which is included as Supporting Information. CCDC number 1989519 (007b-20020) contains the supplementary crystallographic data for this paper. These data can be obtained free of charge from The Cambridge Crystallographic Data Center via [www.ccdc.cam.ac.uk/data\\_request/cif](http://www.ccdc.cam.ac.uk/data_request/cif).



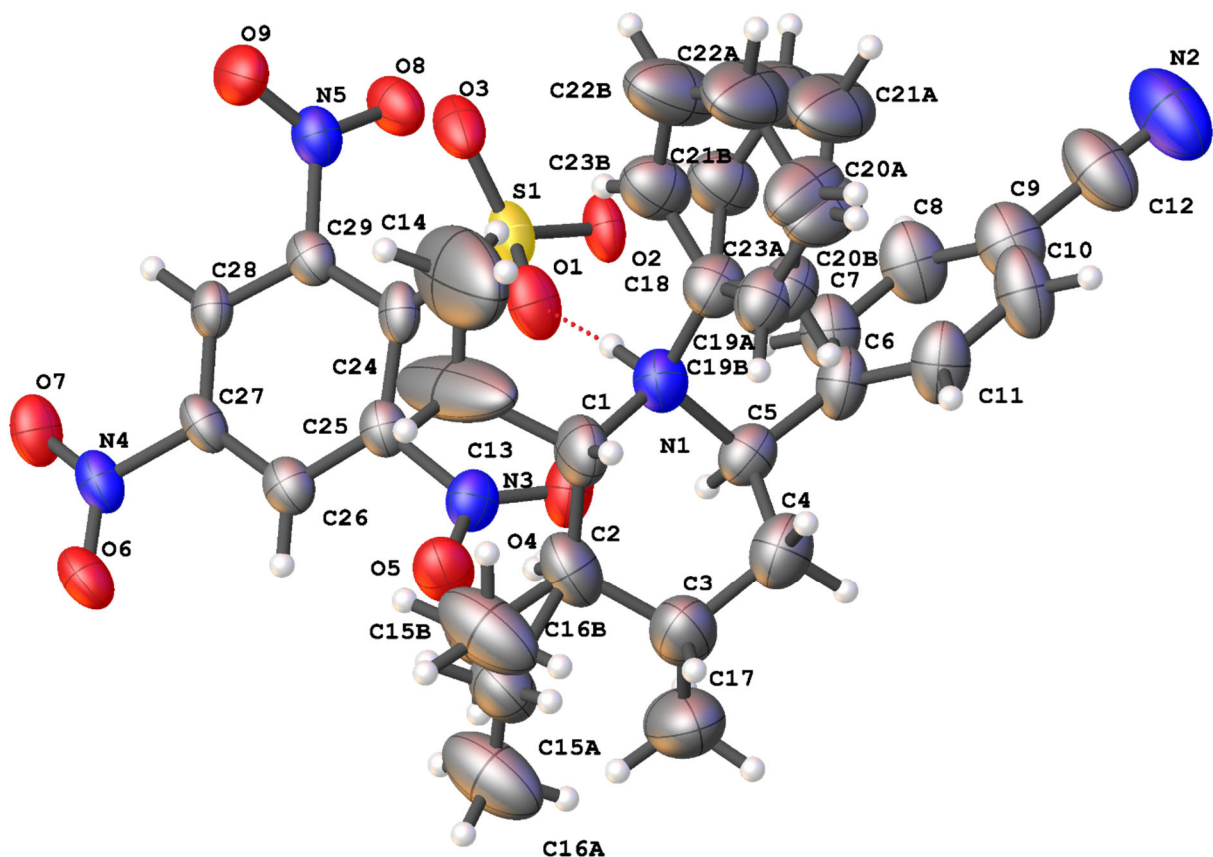

Figure S13. The complete numbering scheme of 007b-20020 with 50% thermal ellipsoid probability levels. The hydrogen atoms are shown as circles for clarity.

Table S31. Crystal data and structure refinement for 007b-20020.

|                        |                                                                 |                 |
|------------------------|-----------------------------------------------------------------|-----------------|
| Identification code    | 007b-20020                                                      |                 |
| Empirical formula      | C <sub>29</sub> H <sub>31</sub> N <sub>5</sub> O <sub>9</sub> S |                 |
| Formula weight         | 625.65                                                          |                 |
| Temperature            | 93(2) K                                                         |                 |
| Wavelength             | 1.54184 Å                                                       |                 |
| Crystal system         | Monoclinic                                                      |                 |
| Space group            | P2 <sub>1</sub> /c                                              |                 |
| Unit cell dimensions   | a = 8.1117(3) Å                                                 | ∠ = 90°.        |
|                        | b = 19.7564(8) Å                                                | ∠ = 92.656(4)°. |
|                        | c = 18.3015(9) Å                                                | ∠ = 90°.        |
| Volume                 | 2929.8(2) Å <sup>3</sup>                                        |                 |
| Z                      | 4                                                               |                 |
| Density (calculated)   | 1.418 Mg/m <sup>3</sup>                                         |                 |
| Absorption coefficient | 1.529 mm <sup>-1</sup>                                          |                 |

F(000) 1312  
 Crystal size 0.040 x 0.040 x 0.020 mm<sup>3</sup>  
 Crystal color and habit Colorless Plate  
 Diffractometer Rigaku Saturn 944+ CCD  
 Theta range for data collection 3.294 to 66.601°.  
 Index ranges -9 ≤ h ≤ 9, -23 ≤ k ≤ 23, 0 ≤ l ≤ 21  
 Reflections collected 5182  
 Independent reflections 5182 [R(int) = 0.2324]  
 Observed reflections (I > 2σ(I)) 3141  
 Completeness to theta = 66.601° 100.0 %  
 Absorption correction Semi-empirical from equivalents  
 Max. and min. transmission 1.00000 and 0.41680  
 Solution method SHELXT-2014/5 (Sheldrick, 2014)  
 Refinement method SHELXL-2014/7 (Sheldrick, 2014)  
 Data / restraints / parameters 5182 / 66 / 413  
 Goodness-of-fit on F2 1.051  
 Final R indices [I > 2σ(I)] R1 = 0.0910, wR2 = 0.2056  
 R indices (all data) R1 = 0.1490, wR2 = 0.2395  
 Largest diff. peak and hole 0.581 and -0.348 e.Å<sup>-3</sup>

Table S32. Atomic coordinates ( × 10<sup>4</sup>) and equivalent isotropic displacement parameters (Å<sup>2</sup> × 10<sup>3</sup>) for 007b-20020. U(eq) is defined as one third of the trace of the orthogonalized U<sub>ij</sub> tensor.

|      | x       | y       | z       | U(eq) |
|------|---------|---------|---------|-------|
| S(1) | 7434(2) | 3652(1) | 5180(1) | 46(1) |
| O(1) | 7866(5) | 3453(2) | 5928(2) | 57(1) |
| O(2) | 5875(4) | 3390(2) | 4896(2) | 46(1) |
| O(3) | 8781(4) | 3584(2) | 4690(2) | 55(1) |
| O(4) | 4952(5) | 4105(2) | 6366(2) | 58(1) |
| O(5) | 6636(6) | 4633(2) | 7127(2) | 60(1) |
| O(6) | 7469(5) | 6923(2) | 6192(2) | 54(1) |
| O(7) | 7770(5) | 7057(2) | 5027(2) | 54(1) |
| O(8) | 6988(5) | 4451(2) | 3641(2) | 53(1) |
| O(9) | 9471(5) | 4883(2) | 3766(2) | 55(1) |

|        |           |          |          |        |
|--------|-----------|----------|----------|--------|
| N(3)   | 6079(6)   | 4507(2)  | 6512(3)  | 48(1)  |
| N(4)   | 7567(5)   | 6712(2)  | 5564(3)  | 45(1)  |
| N(5)   | 8105(6)   | 4752(2)  | 3993(3)  | 46(1)  |
| C(24)  | 7191(6)   | 4565(2)  | 5264(3)  | 38(1)  |
| C(25)  | 6741(6)   | 4893(3)  | 5898(3)  | 39(1)  |
| C(26)  | 6843(6)   | 5581(3)  | 6016(3)  | 43(1)  |
| C(27)  | 7420(6)   | 5970(2)  | 5458(3)  | 40(1)  |
| C(28)  | 7854(6)   | 5704(2)  | 4803(3)  | 38(1)  |
| C(29)  | 7704(6)   | 5005(3)  | 4724(3)  | 39(1)  |
| N(1)   | 8360(6)   | 2522(2)  | 7152(3)  | 54(1)  |
| N(2)   | 2811(9)   | 102(4)   | 4985(5)  | 110(3) |
| C(1)   | 9365(8)   | 2887(4)  | 7757(4)  | 67(2)  |
| C(2)   | 8277(10)  | 3337(3)  | 8201(4)  | 74(2)  |
| C(3)   | 6893(10)  | 2959(4)  | 8554(4)  | 79(2)  |
| C(4)   | 6396(9)   | 2325(4)  | 8134(4)  | 73(2)  |
| C(5)   | 6509(7)   | 2443(3)  | 7335(3)  | 52(2)  |
| C(6)   | 5674(7)   | 1929(3)  | 6836(4)  | 58(2)  |
| C(7)   | 4983(8)   | 2134(3)  | 6159(4)  | 63(2)  |
| C(8)   | 4262(9)   | 1670(3)  | 5681(4)  | 71(2)  |
| C(9)   | 4224(9)   | 986(4)   | 5870(4)  | 76(2)  |
| C(10)  | 4897(9)   | 768(4)   | 6539(4)  | 80(2)  |
| C(11)  | 5595(8)   | 1241(3)  | 7016(4)  | 68(2)  |
| C(12)  | 3424(10)  | 493(4)   | 5365(5)  | 85(2)  |
| C(13)  | 10765(11) | 3349(8)  | 7360(8)  | 190(8) |
| C(14)  | 11742(15) | 2974(7)  | 6913(9)  | 193(7) |
| C(15A) | 9100(70)  | 3720(30) | 9130(30) | 79(3)  |
| C(15B) | 9304(14)  | 3790(5)  | 8715(7)  | 79(3)  |
| C(16A) | 8130(70)  | 4110(30) | 9380(30) | 120(5) |
| C(16B) | 10517(15) | 3416(6)  | 9185(7)  | 120(5) |
| C(17)  | 5376(12)  | 3410(5)  | 8677(5)  | 113(3) |
| C(19B) | 9671(10)  | 1404(4)  | 7420(5)  | 59(2)  |
| C(20A) | 10197(16) | 789(5)   | 7157(7)  | 92(3)  |
| C(21A) | 10139(17) | 647(5)   | 6408(6)  | 119(5) |
| C(22A) | 9526(17)  | 1123(5)  | 5906(6)  | 115(4) |
| C(23A) | 9005(12)  | 1749(4)  | 6152(4)  | 70(3)  |

|        |           |          |          |        |
|--------|-----------|----------|----------|--------|
| C(23B) | 9910(50)  | 1997(17) | 6274(14) | 70(3)  |
| C(18)  | 9083(8)   | 1882(3)  | 6911(3)  | 58(2)  |
| C(19A) | 9380(60)  | 1291(14) | 7310(20) | 59(2)  |
| C(20B) | 10500(80) | 820(20)  | 7070(30) | 92(3)  |
| C(21B) | 11320(70) | 930(30)  | 6430(30) | 119(5) |
| C(22B) | 11030(60) | 1520(30) | 6040(20) | 115(4) |

---

Table S33. Bond lengths [Å] and angles [°] for 007b-20020.

---

|             |          |
|-------------|----------|
| S(1)-O(2)   | 1.441(4) |
| S(1)-O(3)   | 1.451(4) |
| S(1)-O(1)   | 1.452(4) |
| S(1)-C(24)  | 1.823(5) |
| O(4)-N(3)   | 1.231(6) |
| O(5)-N(3)   | 1.220(6) |
| O(6)-N(4)   | 1.230(6) |
| O(7)-N(4)   | 1.213(6) |
| O(8)-N(5)   | 1.240(5) |
| O(9)-N(5)   | 1.230(6) |
| N(3)-C(25)  | 1.478(7) |
| N(4)-C(27)  | 1.483(6) |
| N(5)-C(29)  | 1.478(7) |
| C(24)-C(25) | 1.393(7) |
| C(24)-C(29) | 1.393(7) |
| C(25)-C(26) | 1.379(7) |
| C(26)-C(27) | 1.377(8) |
| C(26)-H(26) | 0.9500   |
| C(27)-C(28) | 1.369(7) |
| C(28)-C(29) | 1.394(7) |
| C(28)-H(28) | 0.9500   |
| N(1)-C(18)  | 1.471(7) |
| N(1)-C(1)   | 1.526(8) |
| N(1)-C(5)   | 1.561(7) |

|              |           |
|--------------|-----------|
| N(1)-H(1)    | 1.0000    |
| N(2)-C(12)   | 1.138(9)  |
| C(1)-C(2)    | 1.515(10) |
| C(1)-C(13)   | 1.650(15) |
| C(1)-H(1A)   | 1.0000    |
| C(2)-C(3)    | 1.517(10) |
| C(2)-C(15B)  | 1.518(12) |
| C(2)-C(15A)  | 1.95(5)   |
| C(2)-H(2B)   | 1.0000    |
| C(2)-H(2A)   | 1.0000    |
| C(3)-C(4)    | 1.514(10) |
| C(3)-C(17)   | 1.544(12) |
| C(3)-H(3)    | 1.0000    |
| C(4)-C(5)    | 1.488(9)  |
| C(4)-H(4A)   | 0.9900    |
| C(4)-H(4B)   | 0.9900    |
| C(5)-C(6)    | 1.505(9)  |
| C(5)-H(5)    | 1.0000    |
| C(6)-C(7)    | 1.396(8)  |
| C(6)-C(11)   | 1.400(9)  |
| C(7)-C(8)    | 1.378(9)  |
| C(7)-H(7)    | 0.9500    |
| C(8)-C(9)    | 1.394(9)  |
| C(8)-H(8)    | 0.9500    |
| C(9)-C(10)   | 1.387(10) |
| C(9)-C(12)   | 1.473(11) |
| C(10)-C(11)  | 1.382(9)  |
| C(10)-H(10)  | 0.9500    |
| C(11)-H(11)  | 0.9500    |
| C(13)-C(14)  | 1.381(15) |
| C(13)-H(13A) | 0.9900    |
| C(13)-H(13B) | 0.9900    |
| C(14)-H(14A) | 0.9800    |
| C(14)-H(14B) | 0.9800    |
| C(14)-H(14C) | 0.9800    |

|               |           |
|---------------|-----------|
| C(15A)-C(16A) | 1.21(7)   |
| C(15A)-H(15A) | 0.9900    |
| C(15A)-H(15B) | 0.9900    |
| C(15B)-C(16B) | 1.475(16) |
| C(15B)-H(15C) | 0.9900    |
| C(15B)-H(15D) | 0.9900    |
| C(16A)-H(16A) | 0.9800    |
| C(16A)-H(16B) | 0.9800    |
| C(16A)-H(16C) | 0.9800    |
| C(16B)-H(16D) | 0.9800    |
| C(16B)-H(16E) | 0.9800    |
| C(16B)-H(16F) | 0.9800    |
| C(17)-H(17A)  | 0.9800    |
| C(17)-H(17B)  | 0.9800    |
| C(17)-H(17C)  | 0.9800    |
| C(19B)-C(20A) | 1.381(9)  |
| C(19B)-C(18)  | 1.395(8)  |
| C(19B)-H(19B) | 0.9500    |
| C(20A)-C(21A) | 1.398(11) |
| C(20A)-H(20A) | 0.9500    |
| C(21A)-C(22A) | 1.391(10) |
| C(21A)-H(21A) | 0.9500    |
| C(22A)-C(23A) | 1.388(9)  |
| C(22A)-H(22A) | 0.9500    |
| C(23A)-C(18)  | 1.412(8)  |
| C(23A)-H(23A) | 0.9500    |
| C(23B)-C(18)  | 1.3900    |
| C(23B)-C(22B) | 1.3900    |
| C(23B)-H(23B) | 0.9500    |
| C(18)-C(19A)  | 1.3900    |
| C(19A)-C(20B) | 1.3900    |
| C(19A)-H(19A) | 0.9500    |
| C(20B)-C(21B) | 1.3900    |
| C(20B)-H(20B) | 0.9500    |
| C(21B)-C(22B) | 1.3900    |

|                   |          |
|-------------------|----------|
| C(21B)-H(21B)     | 0.9500   |
| C(22B)-H(22B)     | 0.9500   |
| O(2)-S(1)-O(3)    | 114.7(2) |
| O(2)-S(1)-O(1)    | 114.3(2) |
| O(3)-S(1)-O(1)    | 113.7(3) |
| O(2)-S(1)-C(24)   | 106.8(2) |
| O(3)-S(1)-C(24)   | 103.3(2) |
| O(1)-S(1)-C(24)   | 102.2(2) |
| O(5)-N(3)-O(4)    | 124.9(5) |
| O(5)-N(3)-C(25)   | 117.6(5) |
| O(4)-N(3)-C(25)   | 117.4(5) |
| O(7)-N(4)-O(6)    | 125.7(5) |
| O(7)-N(4)-C(27)   | 117.6(5) |
| O(6)-N(4)-C(27)   | 116.7(5) |
| O(9)-N(5)-O(8)    | 125.0(5) |
| O(9)-N(5)-C(29)   | 118.4(4) |
| O(8)-N(5)-C(29)   | 116.5(5) |
| C(25)-C(24)-C(29) | 113.6(5) |
| C(25)-C(24)-S(1)  | 124.3(4) |
| C(29)-C(24)-S(1)  | 121.4(4) |
| C(26)-C(25)-C(24) | 124.9(5) |
| C(26)-C(25)-N(3)  | 114.3(5) |
| C(24)-C(25)-N(3)  | 120.8(4) |
| C(27)-C(26)-C(25) | 117.0(5) |
| C(27)-C(26)-H(26) | 121.5    |
| C(25)-C(26)-H(26) | 121.5    |
| C(28)-C(27)-C(26) | 123.1(5) |
| C(28)-C(27)-N(4)  | 118.1(5) |
| C(26)-C(27)-N(4)  | 118.9(5) |
| C(27)-C(28)-C(29) | 116.5(5) |
| C(27)-C(28)-H(28) | 121.7    |
| C(29)-C(28)-H(28) | 121.7    |
| C(24)-C(29)-C(28) | 124.9(5) |
| C(24)-C(29)-N(5)  | 121.0(5) |

|                   |           |
|-------------------|-----------|
| C(28)-C(29)-N(5)  | 114.1(5)  |
| C(18)-N(1)-C(1)   | 114.7(5)  |
| C(18)-N(1)-C(5)   | 112.3(5)  |
| C(1)-N(1)-C(5)    | 112.3(5)  |
| C(18)-N(1)-H(1)   | 105.6     |
| C(1)-N(1)-H(1)    | 105.6     |
| C(5)-N(1)-H(1)    | 105.6     |
| C(2)-C(1)-N(1)    | 111.2(5)  |
| C(2)-C(1)-C(13)   | 110.0(7)  |
| N(1)-C(1)-C(13)   | 107.3(6)  |
| C(2)-C(1)-H(1A)   | 109.4     |
| N(1)-C(1)-H(1A)   | 109.4     |
| C(13)-C(1)-H(1A)  | 109.4     |
| C(1)-C(2)-C(3)    | 113.6(6)  |
| C(1)-C(2)-C(15B)  | 111.2(7)  |
| C(3)-C(2)-C(15B)  | 115.0(8)  |
| C(1)-C(2)-C(15A)  | 120.9(19) |
| C(3)-C(2)-C(15A)  | 92.8(18)  |
| C(1)-C(2)-H(2B)   | 105.3     |
| C(3)-C(2)-H(2B)   | 105.3     |
| C(15B)-C(2)-H(2B) | 105.3     |
| C(1)-C(2)-H(2A)   | 109.4     |
| C(3)-C(2)-H(2A)   | 109.4     |
| C(15A)-C(2)-H(2A) | 109.4     |
| C(4)-C(3)-C(2)    | 112.1(6)  |
| C(4)-C(3)-C(17)   | 110.9(7)  |
| C(2)-C(3)-C(17)   | 112.8(7)  |
| C(4)-C(3)-H(3)    | 106.9     |
| C(2)-C(3)-H(3)    | 106.9     |
| C(17)-C(3)-H(3)   | 106.9     |
| C(5)-C(4)-C(3)    | 110.0(6)  |
| C(5)-C(4)-H(4A)   | 109.7     |
| C(3)-C(4)-H(4A)   | 109.7     |
| C(5)-C(4)-H(4B)   | 109.7     |
| C(3)-C(4)-H(4B)   | 109.7     |



|                     |           |
|---------------------|-----------|
| H(4A)-C(4)-H(4B)    | 108.2     |
| C(4)-C(5)-C(6)      | 116.4(5)  |
| C(4)-C(5)-N(1)      | 109.3(5)  |
| C(6)-C(5)-N(1)      | 110.4(5)  |
| C(4)-C(5)-H(5)      | 106.8     |
| C(6)-C(5)-H(5)      | 106.8     |
| N(1)-C(5)-H(5)      | 106.8     |
| C(7)-C(6)-C(11)     | 117.9(6)  |
| C(7)-C(6)-C(5)      | 119.6(5)  |
| C(11)-C(6)-C(5)     | 122.4(6)  |
| C(8)-C(7)-C(6)      | 120.8(6)  |
| C(8)-C(7)-H(7)      | 119.6     |
| C(6)-C(7)-H(7)      | 119.6     |
| C(7)-C(8)-C(9)      | 120.0(7)  |
| C(7)-C(8)-H(8)      | 120.0     |
| C(9)-C(8)-H(8)      | 120.0     |
| C(10)-C(9)-C(8)     | 120.5(7)  |
| C(10)-C(9)-C(12)    | 119.5(7)  |
| C(8)-C(9)-C(12)     | 120.0(7)  |
| C(11)-C(10)-C(9)    | 118.7(7)  |
| C(11)-C(10)-H(10)   | 120.7     |
| C(9)-C(10)-H(10)    | 120.7     |
| C(10)-C(11)-C(6)    | 122.0(6)  |
| C(10)-C(11)-H(11)   | 119.0     |
| C(6)-C(11)-H(11)    | 119.0     |
| N(2)-C(12)-C(9)     | 178.7(10) |
| C(14)-C(13)-C(1)    | 113.0(12) |
| C(14)-C(13)-H(13A)  | 109.0     |
| C(1)-C(13)-H(13A)   | 109.0     |
| C(14)-C(13)-H(13B)  | 109.0     |
| C(1)-C(13)-H(13B)   | 109.0     |
| H(13A)-C(13)-H(13B) | 107.8     |
| C(13)-C(14)-H(14A)  | 109.5     |
| C(13)-C(14)-H(14B)  | 109.5     |
| H(14A)-C(14)-H(14B) | 109.5     |

|                      |          |
|----------------------|----------|
| C(13)-C(14)-H(14C)   | 109.5    |
| H(14A)-C(14)-H(14C)  | 109.5    |
| H(14B)-C(14)-H(14C)  | 109.5    |
| C(16A)-C(15A)-C(2)   | 112(4)   |
| C(16A)-C(15A)-H(15A) | 109.2    |
| C(2)-C(15A)-H(15A)   | 109.2    |
| C(16A)-C(15A)-H(15B) | 109.2    |
| C(2)-C(15A)-H(15B)   | 109.2    |
| H(15A)-C(15A)-H(15B) | 107.9    |
| C(16B)-C(15B)-C(2)   | 113.4(8) |
| C(16B)-C(15B)-H(15C) | 108.9    |
| C(2)-C(15B)-H(15C)   | 108.9    |
| C(16B)-C(15B)-H(15D) | 108.9    |
| C(2)-C(15B)-H(15D)   | 108.9    |
| H(15C)-C(15B)-H(15D) | 107.7    |
| C(15A)-C(16A)-H(16A) | 109.5    |
| C(15A)-C(16A)-H(16B) | 109.5    |
| H(16A)-C(16A)-H(16B) | 109.5    |
| C(15A)-C(16A)-H(16C) | 109.5    |
| H(16A)-C(16A)-H(16C) | 109.5    |
| H(16B)-C(16A)-H(16C) | 109.5    |
| C(15B)-C(16B)-H(16D) | 109.5    |
| C(15B)-C(16B)-H(16E) | 109.5    |
| H(16D)-C(16B)-H(16E) | 109.5    |
| C(15B)-C(16B)-H(16F) | 109.5    |
| H(16D)-C(16B)-H(16F) | 109.5    |
| H(16E)-C(16B)-H(16F) | 109.5    |
| C(3)-C(17)-H(17A)    | 109.5    |
| C(3)-C(17)-H(17B)    | 109.5    |
| H(17A)-C(17)-H(17B)  | 109.5    |
| C(3)-C(17)-H(17C)    | 109.5    |
| H(17A)-C(17)-H(17C)  | 109.5    |
| H(17B)-C(17)-H(17C)  | 109.5    |
| C(20A)-C(19B)-C(18)  | 117.7(8) |
| C(20A)-C(19B)-H(19B) | 121.2    |

|                      |           |
|----------------------|-----------|
| C(18)-C(19B)-H(19B)  | 121.2     |
| C(19B)-C(20A)-C(21A) | 121.4(8)  |
| C(19B)-C(20A)-H(20A) | 119.3     |
| C(21A)-C(20A)-H(20A) | 119.3     |
| C(22A)-C(21A)-C(20A) | 120.4(9)  |
| C(22A)-C(21A)-H(21A) | 119.8     |
| C(20A)-C(21A)-H(21A) | 119.8     |
| C(23A)-C(22A)-C(21A) | 119.6(9)  |
| C(23A)-C(22A)-H(22A) | 120.2     |
| C(21A)-C(22A)-H(22A) | 120.2     |
| C(22A)-C(23A)-C(18)  | 118.9(8)  |
| C(22A)-C(23A)-H(23A) | 120.6     |
| C(18)-C(23A)-H(23A)  | 120.6     |
| C(18)-C(23B)-C(22B)  | 120.0     |
| C(18)-C(23B)-H(23B)  | 120.0     |
| C(22B)-C(23B)-H(23B) | 120.0     |
| C(23B)-C(18)-C(19A)  | 120.0     |
| C(19B)-C(18)-C(23A)  | 122.0(7)  |
| C(23B)-C(18)-N(1)    | 109.0(13) |
| C(19A)-C(18)-N(1)    | 128.7(14) |
| C(19B)-C(18)-N(1)    | 120.7(6)  |
| C(23A)-C(18)-N(1)    | 117.0(5)  |
| C(20B)-C(19A)-C(18)  | 120.0     |
| C(20B)-C(19A)-H(19A) | 120.0     |
| C(18)-C(19A)-H(19A)  | 120.0     |
| C(19A)-C(20B)-C(21B) | 120.0     |
| C(19A)-C(20B)-H(20B) | 120.0     |
| C(21B)-C(20B)-H(20B) | 120.0     |
| C(20B)-C(21B)-C(22B) | 120.0     |
| C(20B)-C(21B)-H(21B) | 120.0     |
| C(22B)-C(21B)-H(21B) | 120.0     |
| C(21B)-C(22B)-C(23B) | 120.0     |
| C(21B)-C(22B)-H(22B) | 120.0     |
| C(23B)-C(22B)-H(22B) | 120.0     |

Symmetry transformations used to generate equivalent atoms:

Table S34. Anisotropic displacement parameters ( $\text{\AA}^2 \times 10^3$ ) for 007b-20020. The anisotropic displacement factor exponent takes the form:  $-2\pi^2 [h^2 a^{*2} U_{11} + \dots + 2 h k a^* b^* U_{12}]$

|       | U11    | U22   | U33   | U23    | U13    |
|-------|--------|-------|-------|--------|--------|
|       | U12    |       |       |        |        |
| S(1)  | 38(1)  | 30(1) | 69(1) | 1(1)   | -10(1) |
|       | -2(1)  |       |       |        |        |
| O(1)  | 61(3)  | 35(2) | 72(3) | 10(2)  | -18(2) |
|       | 1(2)   |       |       |        |        |
| O(2)  | 36(2)  | 34(2) | 68(3) | 2(2)   | -12(2) |
|       | -9(2)  |       |       |        |        |
| O(3)  | 33(2)  | 39(2) | 93(3) | -14(2) | 5(2)   |
|       | 2(2)   |       |       |        |        |
| O(4)  | 48(2)  | 52(2) | 74(3) | 17(2)  | -5(2)  |
|       | -13(2) |       |       |        |        |
| O(5)  | 74(3)  | 57(3) | 49(3) | 4(2)   | -5(2)  |
|       | -6(2)  |       |       |        |        |
| O(6)  | 55(3)  | 37(2) | 71(3) | -13(2) | -7(2)  |
|       | 2(2)   |       |       |        |        |
| O(7)  | 55(3)  | 35(2) | 69(3) | 11(2)  | -12(2) |
|       | 0(2)   |       |       |        |        |
| O(8)  | 42(2)  | 55(2) | 63(3) | -16(2) | -5(2)  |
|       | -4(2)  |       |       |        |        |
| O(9)  | 41(2)  | 61(3) | 63(3) | -7(2)  | 4(2)   |
|       | -9(2)  |       |       |        |        |
| N(3)  | 46(3)  | 41(3) | 55(3) | 9(2)   | 0(2)   |
|       | 1(2)   |       |       |        |        |
| N(4)  | 40(3)  | 31(2) | 63(3) | -3(2)  | -10(2) |
|       | 0(2)   |       |       |        |        |
| N(5)  | 43(3)  | 40(3) | 54(3) | 0(2)   | -6(2)  |
|       | -3(2)  |       |       |        |        |
| C(24) | 26(3)  | 32(3) | 57(3) | 7(3)   | -8(2)  |

|       |        |       |        |        |        |
|-------|--------|-------|--------|--------|--------|
|       | -4(2)  |       |        |        |        |
| C(25) | 32(3)  | 35(3) | 48(3)  | 2(2)   | -7(2)  |
|       | 1(2)   |       |        |        |        |
| C(26) | 34(3)  | 41(3) | 53(3)  | -2(3)  | -7(2)  |
|       | 2(2)   |       |        |        |        |
| C(27) | 37(3)  | 27(3) | 54(3)  | -5(2)  | -12(3) |
|       | 3(2)   |       |        |        |        |
| C(28) | 29(3)  | 32(3) | 51(3)  | 3(2)   | -3(2)  |
|       | -5(2)  |       |        |        |        |
| C(29) | 30(3)  | 36(3) | 50(3)  | -3(3)  | -6(2)  |
|       | 1(2)   |       |        |        |        |
| N(1)  | 53(3)  | 47(3) | 61(3)  | 2(2)   | 0(2)   |
|       | -4(2)  |       |        |        |        |
| N(2)  | 88(5)  | 89(5) | 151(7) | -37(5) | -27(5) |
|       | 3(4)   |       |        |        |        |
| C(1)  | 51(4)  | 62(4) | 89(5)  | -8(4)  | 1(3)   |
|       | -15(3) |       |        |        |        |
| C(2)  | 86(5)  | 49(4) | 85(5)  | -6(4)  | -9(4)  |
|       | -5(4)  |       |        |        |        |
| C(3)  | 91(6)  | 78(5) | 70(5)  | -3(4)  | 6(4)   |
|       | -14(5) |       |        |        |        |
| C(4)  | 65(4)  | 73(5) | 82(5)  | 16(4)  | 3(4)   |
|       | -5(4)  |       |        |        |        |
| C(5)  | 47(3)  | 53(4) | 58(4)  | 11(3)  | 4(3)   |
|       | 4(3)   |       |        |        |        |
| C(6)  | 45(3)  | 54(4) | 73(4)  | 15(3)  | -5(3)  |
|       | -9(3)  |       |        |        |        |
| C(7)  | 57(4)  | 55(4) | 76(5)  | 11(3)  | -13(3) |
|       | 0(3)   |       |        |        |        |
| C(8)  | 68(5)  | 60(4) | 84(5)  | 13(4)  | -24(4) |
|       | 7(4)   |       |        |        |        |
| C(9)  | 69(5)  | 65(5) | 93(6)  | 2(4)   | -16(4) |
|       | 7(4)   |       |        |        |        |
| C(10) | 71(5)  | 54(4) | 112(6) | 10(4)  | -32(4) |
|       | -8(4)  |       |        |        |        |

|        |                  |         |         |          |        |
|--------|------------------|---------|---------|----------|--------|
| C(11)  | 59(4)<br>-9(3)   | 66(4)   | 77(5)   | 21(4)    | -18(4) |
| C(12)  | 73(5)<br>13(4)   | 64(5)   | 116(7)  | -23(5)   | -27(5) |
| C(13)  | 53(6)<br>-30(8)  | 310(19) | 211(13) | -180(14) | 38(7)  |
| C(14)  | 97(9)<br>-62(9)  | 214(15) | 269(18) | -114(14) | 24(10) |
| C(15A) | 86(6)<br>-4(5)   | 65(6)   | 85(8)   | -18(7)   | 2(7)   |
| C(15B) | 86(6)<br>-4(5)   | 65(6)   | 85(8)   | -18(7)   | 2(7)   |
| C(16A) | 100(9)<br>29(7)  | 113(9)  | 143(10) | -57(8)   | -42(8) |
| C(16B) | 100(9)<br>29(7)  | 113(9)  | 143(10) | -57(8)   | -42(8) |
| C(17)  | 101(7)<br>-15(6) | 121(8)  | 120(8)  | -33(6)   | 39(6)  |
| C(19B) | 52(4)<br>3(4)    | 54(4)   | 70(5)   | 13(4)    | 4(4)   |
| C(20A) | 102(8)<br>32(5)  | 67(5)   | 111(8)  | 23(5)    | 38(6)  |
| C(21A) | 167(13)<br>33(7) | 61(6)   | 132(10) | -5(7)    | 60(9)  |
| C(22A) | 180(13)<br>29(7) | 75(7)   | 91(7)   | -11(6)   | 30(8)  |
| C(23A) | 88(7)<br>7(5)    | 63(5)   | 59(5)   | 0(4)     | 1(4)   |
| C(23B) | 88(7)<br>7(5)    | 63(5)   | 59(5)   | 0(4)     | 1(4)   |
| C(18)  | 54(4)<br>8(3)    | 53(4)   | 68(4)   | 7(3)     | 4(3)   |
| C(19A) | 52(4)<br>3(4)    | 54(4)   | 70(5)   | 13(4)    | 4(4)   |
| C(20B) | 102(8)           | 67(5)   | 111(8)  | 23(5)    | 38(6)  |

|        |         |       |         |        |       |
|--------|---------|-------|---------|--------|-------|
|        | 32(5)   |       |         |        |       |
| C(21B) | 167(13) | 61(6) | 132(10) | -5(7)  | 60(9) |
|        | 33(7)   |       |         |        |       |
| C(22B) | 180(13) | 75(7) | 91(7)   | -11(6) | 30(8) |
|        | 29(7)   |       |         |        |       |

Table S35. Hydrogen coordinates ( $\times 10^4$ ) and isotropic displacement parameters ( $\text{\AA}^2 \times 10^3$ ) for 007b-20020.

|        | x     | y    | z    | U(eq) |
|--------|-------|------|------|-------|
| H(26)  | 6529  | 5779 | 6462 | 51    |
| H(28)  | 8237  | 5982 | 4423 | 45    |
| H(1)   | 8362  | 2829 | 6718 | 65    |
| H(1A)  | 9928  | 2546 | 8086 | 81    |
| H(2B)  | 7719  | 3650 | 7839 | 88    |
| H(2A)  | 7801  | 3706 | 7883 | 88    |
| H(3)   | 7330  | 2810 | 9048 | 95    |
| H(4A)  | 7132  | 1947 | 8289 | 88    |
| H(4B)  | 5252  | 2199 | 8242 | 88    |
| H(5)   | 5965  | 2888 | 7225 | 63    |
| H(7)   | 5011  | 2598 | 6025 | 76    |
| H(8)   | 3790  | 1815 | 5223 | 86    |
| H(10)  | 4879  | 302  | 6668 | 96    |
| H(11)  | 6035  | 1096 | 7480 | 82    |
| H(13A) | 10202 | 3708 | 7067 | 229   |
| H(13B) | 11478 | 3571 | 7743 | 229   |
| H(14A) | 12126 | 2565 | 7171 | 290   |
| H(14B) | 12695 | 3245 | 6781 | 290   |
| H(14C) | 11098 | 2845 | 6468 | 290   |
| H(15A) | 9322  | 3349 | 9486 | 94    |
| H(15B) | 10148 | 3959 | 9059 | 94    |
| H(15C) | 9896  | 4125 | 8422 | 94    |
| H(15D) | 8556  | 4042 | 9030 | 94    |

|        |       |      |      |     |
|--------|-------|------|------|-----|
| H(16A) | 7981  | 4501 | 9056 | 180 |
| H(16B) | 8549  | 4263 | 9865 | 180 |
| H(16C) | 7064  | 3883 | 9431 | 180 |
| H(16D) | 9938  | 3096 | 9492 | 180 |
| H(16E) | 11150 | 3735 | 9496 | 180 |
| H(16F) | 11269 | 3167 | 8878 | 180 |
| H(17A) | 4821  | 3518 | 8204 | 170 |
| H(17B) | 5735  | 3830 | 8921 | 170 |
| H(17C) | 4610  | 3169 | 8983 | 170 |
| H(19B) | 9707  | 1497 | 7929 | 71  |
| H(20A) | 10608 | 456  | 7493 | 111 |
| H(21A) | 10520 | 222  | 6241 | 142 |
| H(22A) | 9464  | 1021 | 5399 | 137 |
| H(23A) | 8604  | 2083 | 5815 | 84  |
| H(23B) | 9710  | 2401 | 6002 | 84  |
| H(19A) | 8810  | 1212 | 7744 | 71  |
| H(20B) | 10697 | 413  | 7343 | 111 |
| H(21B) | 12091 | 608  | 6272 | 142 |
| H(22B) | 11597 | 1602 | 5601 | 137 |

---

Table S36. Torsion angles [°] for 007b-20020.

|                         |           |
|-------------------------|-----------|
| O(2)-S(1)-C(24)-C(25)   | 93.2(4)   |
| O(3)-S(1)-C(24)-C(25)   | -145.4(4) |
| O(1)-S(1)-C(24)-C(25)   | -27.1(5)  |
| O(2)-S(1)-C(24)-C(29)   | -97.3(4)  |
| O(3)-S(1)-C(24)-C(29)   | 24.1(5)   |
| O(1)-S(1)-C(24)-C(29)   | 142.3(4)  |
| C(29)-C(24)-C(25)-C(26) | -2.7(7)   |
| S(1)-C(24)-C(25)-C(26)  | 167.5(4)  |
| C(29)-C(24)-C(25)-N(3)  | 176.6(4)  |
| S(1)-C(24)-C(25)-N(3)   | -13.2(7)  |
| O(5)-N(3)-C(25)-C(26)   | -46.8(6)  |



|                         |           |
|-------------------------|-----------|
| O(4)-N(3)-C(25)-C(26)   | 130.0(5)  |
| O(5)-N(3)-C(25)-C(24)   | 133.8(5)  |
| O(4)-N(3)-C(25)-C(24)   | -49.4(7)  |
| C(24)-C(25)-C(26)-C(27) | 0.6(8)    |
| N(3)-C(25)-C(26)-C(27)  | -178.7(4) |
| C(25)-C(26)-C(27)-C(28) | 1.3(7)    |
| C(25)-C(26)-C(27)-N(4)  | -179.4(4) |
| O(7)-N(4)-C(27)-C(28)   | 13.2(7)   |
| O(6)-N(4)-C(27)-C(28)   | -167.0(4) |
| O(7)-N(4)-C(27)-C(26)   | -166.2(5) |
| O(6)-N(4)-C(27)-C(26)   | 13.7(7)   |
| C(26)-C(27)-C(28)-C(29) | -0.8(7)   |
| N(4)-C(27)-C(28)-C(29)  | 179.8(4)  |
| C(25)-C(24)-C(29)-C(28) | 3.3(7)    |
| S(1)-C(24)-C(29)-C(28)  | -167.3(4) |
| C(25)-C(24)-C(29)-N(5)  | -175.3(4) |
| S(1)-C(24)-C(29)-N(5)   | 14.2(6)   |
| C(27)-C(28)-C(29)-C(24) | -1.7(7)   |
| C(27)-C(28)-C(29)-N(5)  | 177.0(4)  |
| O(9)-N(5)-C(29)-C(24)   | -124.8(5) |
| O(8)-N(5)-C(29)-C(24)   | 59.0(6)   |
| O(9)-N(5)-C(29)-C(28)   | 56.5(6)   |
| O(8)-N(5)-C(29)-C(28)   | -119.7(5) |
| C(18)-N(1)-C(1)-C(2)    | -154.5(6) |
| C(5)-N(1)-C(1)-C(2)     | -24.8(7)  |
| C(18)-N(1)-C(1)-C(13)   | 85.1(8)   |
| C(5)-N(1)-C(1)-C(13)    | -145.1(7) |
| N(1)-C(1)-C(2)-C(3)     | 58.1(8)   |
| C(13)-C(1)-C(2)-C(3)    | 176.9(7)  |
| N(1)-C(1)-C(2)-C(15B)   | -170.3(7) |
| C(13)-C(1)-C(2)-C(15B)  | -51.5(10) |
| N(1)-C(1)-C(2)-C(15A)   | 167(2)    |
| C(13)-C(1)-C(2)-C(15A)  | -74(2)    |
| C(1)-C(2)-C(3)-C(4)     | -26.4(9)  |
| C(15B)-C(2)-C(3)-C(4)   | -156.1(7) |

|                             |            |
|-----------------------------|------------|
| C(15A)-C(2)-C(3)-C(4)       | -152.0(18) |
| C(1)-C(2)-C(3)-C(17)        | -152.5(7)  |
| C(15B)-C(2)-C(3)-C(17)      | 77.8(9)    |
| C(15A)-C(2)-C(3)-C(17)      | 81.9(19)   |
| C(2)-C(3)-C(4)-C(5)         | -36.0(9)   |
| C(17)-C(3)-C(4)-C(5)        | 91.1(8)    |
| C(3)-C(4)-C(5)-C(6)         | -165.6(6)  |
| C(3)-C(4)-C(5)-N(1)         | 68.7(7)    |
| C(18)-N(1)-C(5)-C(4)        | 95.2(6)    |
| C(1)-N(1)-C(5)-C(4)         | -35.7(7)   |
| C(18)-N(1)-C(5)-C(6)        | -34.0(6)   |
| C(1)-N(1)-C(5)-C(6)         | -164.9(5)  |
| C(4)-C(5)-C(6)-C(7)         | 147.7(6)   |
| N(1)-C(5)-C(6)-C(7)         | -87.1(7)   |
| C(4)-C(5)-C(6)-C(11)        | -34.1(9)   |
| N(1)-C(5)-C(6)-C(11)        | 91.1(7)    |
| C(11)-C(6)-C(7)-C(8)        | -0.6(10)   |
| C(5)-C(6)-C(7)-C(8)         | 177.7(6)   |
| C(6)-C(7)-C(8)-C(9)         | -0.4(11)   |
| C(7)-C(8)-C(9)-C(10)        | 0.5(12)    |
| C(7)-C(8)-C(9)-C(12)        | 178.8(7)   |
| C(8)-C(9)-C(10)-C(11)       | 0.4(12)    |
| C(12)-C(9)-C(10)-C(11)      | -177.9(7)  |
| C(9)-C(10)-C(11)-C(6)       | -1.4(12)   |
| C(7)-C(6)-C(11)-C(10)       | 1.5(11)    |
| C(5)-C(6)-C(11)-C(10)       | -176.7(7)  |
| C(2)-C(1)-C(13)-C(14)       | -176.6(11) |
| N(1)-C(1)-C(13)-C(14)       | -55.4(13)  |
| C(1)-C(2)-C(15B)-C(16B)     | -53.1(13)  |
| C(3)-C(2)-C(15B)-C(16B)     | 77.8(12)   |
| C(18)-C(19B)-C(20A)-C(21A)  | -0.3(16)   |
| C(19B)-C(20A)-C(21A)-C(22A) | -1(2)      |
| C(20A)-C(21A)-C(22A)-C(23A) | 1(2)       |
| C(21A)-C(22A)-C(23A)-C(18)  | -1.2(17)   |
| C(22B)-C(23B)-C(18)-C(19A)  | 0.0        |

|                             |           |
|-----------------------------|-----------|
| C(22B)-C(23B)-C(18)-N(1)    | 164.0(19) |
| C(20A)-C(19B)-C(18)-C(23A)  | 0.6(12)   |
| C(20A)-C(19B)-C(18)-N(1)    | 174.3(8)  |
| C(22A)-C(23A)-C(18)-C(19B)  | 0.2(13)   |
| C(22A)-C(23A)-C(18)-N(1)    | -173.8(9) |
| C(1)-N(1)-C(18)-C(23B)      | -99(2)    |
| C(5)-N(1)-C(18)-C(23B)      | 131(2)    |
| C(1)-N(1)-C(18)-C(19A)      | 63(3)     |
| C(5)-N(1)-C(18)-C(19A)      | -66(3)    |
| C(1)-N(1)-C(18)-C(19B)      | 47.1(8)   |
| C(5)-N(1)-C(18)-C(19B)      | -82.6(7)  |
| C(1)-N(1)-C(18)-C(23A)      | -138.9(7) |
| C(5)-N(1)-C(18)-C(23A)      | 91.4(7)   |
| C(23B)-C(18)-C(19A)-C(20B)  | 0.0       |
| N(1)-C(18)-C(19A)-C(20B)    | -161(2)   |
| C(18)-C(19A)-C(20B)-C(21B)  | 0.0       |
| C(19A)-C(20B)-C(21B)-C(22B) | 0.0       |
| C(20B)-C(21B)-C(22B)-C(23B) | 0.0       |
| C(18)-C(23B)-C(22B)-C(21B)  | 0.0       |

---

Symmetry transformations used to generate equivalent atoms:

Table S37. Hydrogen bonds for 007b-20020 [Å and °].

---

| D-H...A          | d(D-H) | d(H...A) | d(D...A) | <(DHA) |
|------------------|--------|----------|----------|--------|
| N(1)-H(1)...O(1) | 1.00   | 1.93     | 2.911(6) | 167.4  |

---

Symmetry transformations used to generate equivalent atoms:

## Product 2z

### Crystal Growth

**2z** (10 mg) and picrylsulfonic acid dihydrate (0.9 equiv) were dissolved in a mixture of toluene (0.25 mL) and DCM (0.25 mL) in a 1-dram vial. Methanol was added dropwise until complete dissolution occurred. A few drops of hexanes were added until the cloud point was reached. Single crystals suitable for X-ray diffraction grew at room temperature over 3-5 days.

### Experimental

Low-temperature diffraction data ( $\omega$ -scans) were collected on a Rigaku MicroMax-007HF diffractometer coupled to a Dectris Pilatus3R detector with Mo K $\alpha$  ( $\lambda = 0.71073$  Å) for the structure of 007c-20017. The diffraction images were processed and scaled using Rigaku Oxford Diffraction software (CrysAlisPro; Rigaku OD: The Woodlands, TX, 2015). The structure was solved with SHELXT and was refined against  $F^2$  on all data by full-matrix least squares with SHELXL (Sheldrick, G. M. Acta Cryst. 2008, A64, 112–122). All non-hydrogen atoms were refined anisotropically. Hydrogen atoms were included in the model at geometrically calculated positions and refined using a riding model. The isotropic displacement parameters of all hydrogen atoms were fixed to 1.2 times the U value of the atoms to which they are linked (1.5 times for methyl groups). The only exception is H1, which was found in the difference map and freely refined. The toluene crystallized near the inversion center. The best refinement was obtained by suppressing the special position constraints and placing a whole model of toluene near the observed electron density (see Guzei, I. A. (2014). J. Appl. Crystallogr. 47, 806-809). The model was then allowed to freely refine at half occupancy. The full numbering scheme of compound 007c-20017 can be found in the full details of the X-ray structure determination (CIF), which is included as Supporting Information. CCDC number 1989520 (007c-20017) contains the supplementary crystallographic data for this paper. These data can be obtained free of charge from The Cambridge Crystallographic Data Center via [www.ccdc.cam.ac.uk/data\\_request/cif](http://www.ccdc.cam.ac.uk/data_request/cif).

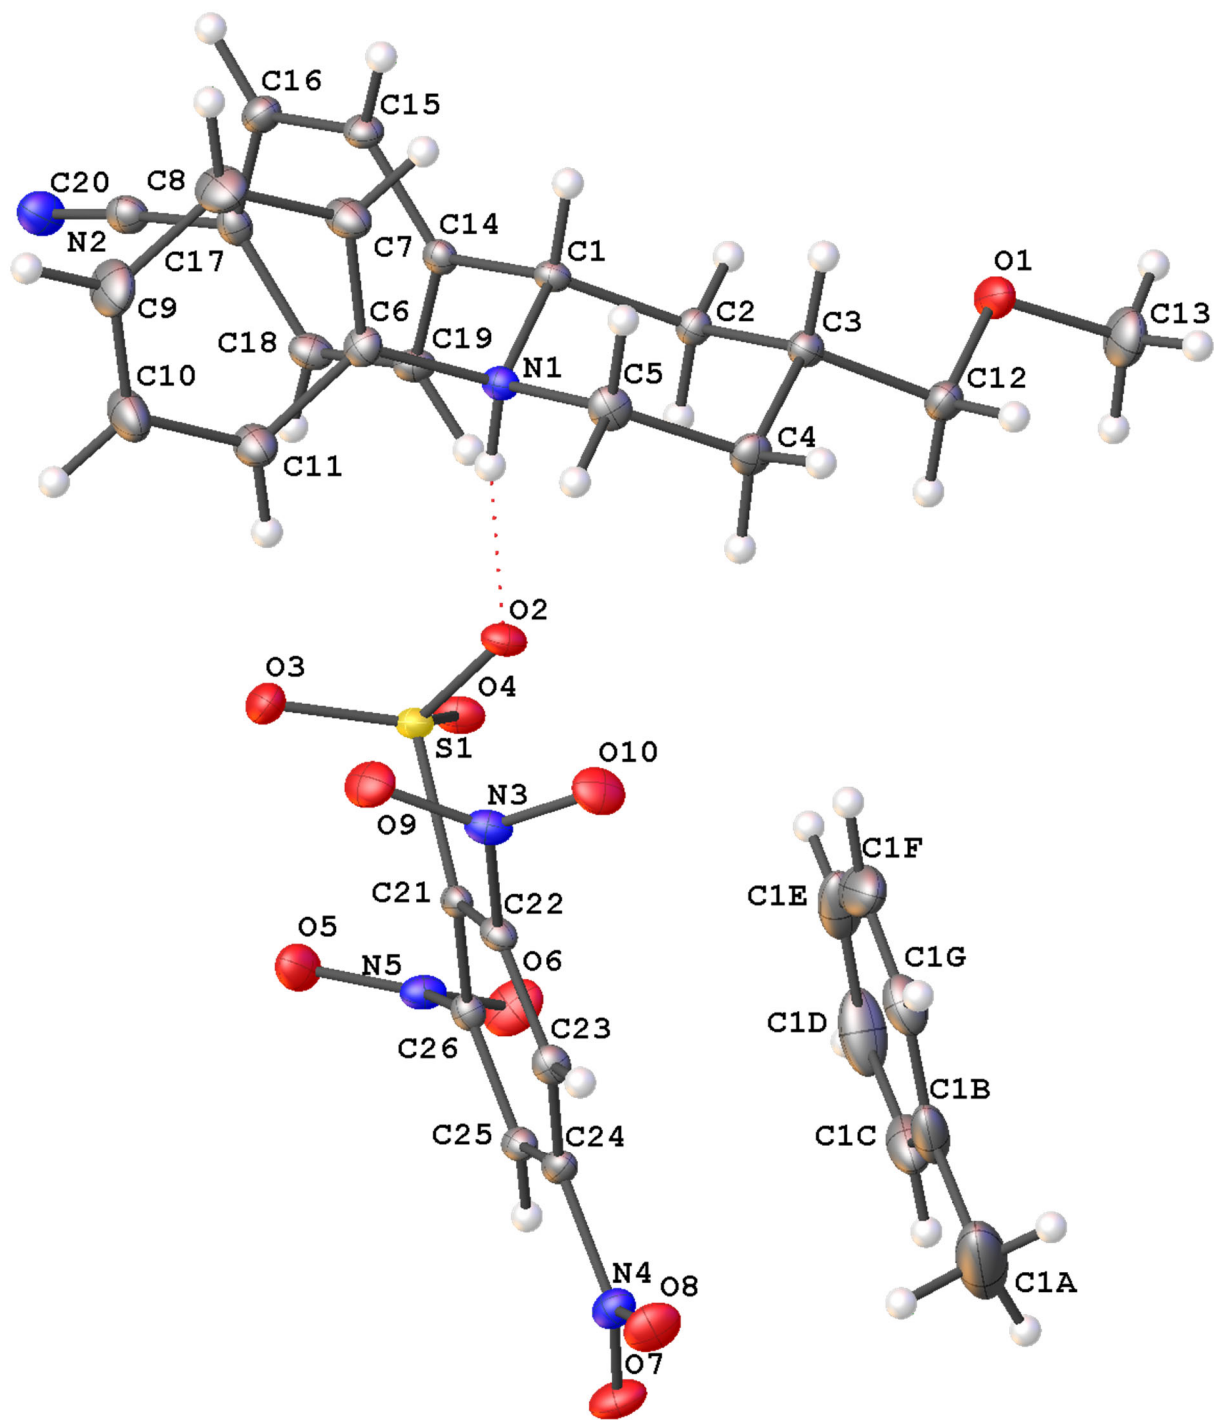

Figure S14. The complete numbering scheme of 007c-20017 with 50% thermal ellipsoid probability levels. The hydrogen atoms are shown as circles for clarity.

Table S38. Crystal data and structure refinement for 007c-20017.

|                                   |                                                                     |                 |
|-----------------------------------|---------------------------------------------------------------------|-----------------|
| Identification code               | 007c-20017                                                          |                 |
| Empirical formula                 | C <sub>29.50</sub> H <sub>29</sub> N <sub>5</sub> O <sub>10</sub> S |                 |
| Formula weight                    | 645.64                                                              |                 |
| Temperature                       | 93(2) K                                                             |                 |
| Wavelength                        | 0.71073 Å                                                           |                 |
| Crystal system                    | Triclinic                                                           |                 |
| Space group                       | P-1                                                                 |                 |
| Unit cell dimensions              | a = 8.9495(3) Å                                                     | α = 81.734(2)°. |
|                                   | b = 9.6147(3) Å                                                     | β = 86.081(2)°. |
|                                   | c = 18.2756(5) Å                                                    | γ = 75.200(3)°. |
| Volume                            | 1503.77(8) Å <sup>3</sup>                                           |                 |
| Z                                 | 2                                                                   |                 |
| Density (calculated)              | 1.426 Mg/m <sup>3</sup>                                             |                 |
| Absorption coefficient            | 0.175 mm <sup>-1</sup>                                              |                 |
| F(000)                            | 674                                                                 |                 |
| Crystal size                      | 0.200 x 0.200 x 0.040 mm <sup>3</sup>                               |                 |
| Crystal color and habit           | Colorless Plate                                                     |                 |
| Diffractometer                    | Dectris Pilatus 3R                                                  |                 |
| Theta range for data collection   | 2.943 to 27.482°.                                                   |                 |
| Index ranges                      | -10 ≤ h ≤ 11, -12 ≤ k ≤ 12, -23 ≤ l ≤ 23                            |                 |
| Reflections collected             | 35175                                                               |                 |
| Independent reflections           | 6892 [R(int) = 0.0248]                                              |                 |
| Observed reflections (I > 2σ(I))  | 6140                                                                |                 |
| Completeness to theta = 25.242°   | 99.8 %                                                              |                 |
| Absorption correction             | Semi-empirical from equivalents                                     |                 |
| Max. and min. transmission        | 1.00000 and 0.55232                                                 |                 |
| Solution method                   | SHELXT-2014/5 (Sheldrick, 2014)                                     |                 |
| Refinement method                 | SHELXL-2014/7 (Sheldrick, 2014)                                     |                 |
| Data / restraints / parameters    | 6892 / 0 / 448                                                      |                 |
| Goodness-of-fit on F <sup>2</sup> | 1.033                                                               |                 |
| Final R indices [I > 2σ(I)]       | R1 = 0.0314, wR2 = 0.0813                                           |                 |
| R indices (all data)              | R1 = 0.0361, wR2 = 0.0837                                           |                 |
| Largest diff. peak and hole       | 0.387 and -0.432 e.Å <sup>-3</sup>                                  |                 |

Table S39. Atomic coordinates (x 104) and equivalent isotropic displacement parameters (Å<sup>2</sup> x 10<sup>3</sup>) for 007c-20017. U(eq) is defined as one third of the trace of the orthogonalized Uij tensor.

|       | x        | y        | z       | U(eq) |
|-------|----------|----------|---------|-------|
| S(1)  | 6086(1)  | 4451(1)  | 3281(1) | 12(1) |
| O(2)  | 7665(1)  | 4521(1)  | 3040(1) | 16(1) |
| N(3)  | 8332(1)  | 5136(1)  | 4341(1) | 15(1) |
| O(3)  | 4997(1)  | 5846(1)  | 3226(1) | 20(1) |
| O(4)  | 5601(1)  | 3337(1)  | 2978(1) | 18(1) |
| N(4)  | 7300(1)  | 1755(1)  | 6460(1) | 16(1) |
| N(5)  | 4275(1)  | 2445(1)  | 4261(1) | 15(1) |
| O(5)  | 3129(1)  | 3426(1)  | 4102(1) | 21(1) |
| O(6)  | 4449(1)  | 1177(1)  | 4172(1) | 26(1) |
| O(7)  | 6527(1)  | 923(1)   | 6736(1) | 22(1) |
| O(8)  | 8337(1)  | 2038(1)  | 6770(1) | 23(1) |
| O(9)  | 7612(1)  | 6401(1)  | 4187(1) | 22(1) |
| O(10) | 9736(1)  | 4681(1)  | 4268(1) | 22(1) |
| C(21) | 6316(1)  | 3793(1)  | 4256(1) | 11(1) |
| C(22) | 7439(1)  | 4082(1)  | 4664(1) | 13(1) |
| C(23) | 7798(1)  | 3432(1)  | 5378(1) | 14(1) |
| C(24) | 6965(1)  | 2465(1)  | 5698(1) | 13(1) |
| C(25) | 5826(1)  | 2124(1)  | 5336(1) | 12(1) |
| C(26) | 5527(1)  | 2809(1)  | 4624(1) | 12(1) |
| O(1)  | 12316(1) | 1287(1)  | 1213(1) | 20(1) |
| N(1)  | 9138(1)  | 6136(1)  | 2020(1) | 12(1) |
| C(1)  | 9196(1)  | 5494(1)  | 1296(1) | 11(1) |
| C(2)  | 9911(1)  | 3857(1)  | 1437(1) | 13(1) |
| N(2)  | 1771(1)  | 7080(1)  | 63(1)   | 20(1) |
| C(3)  | 11527(1) | 3489(1)  | 1749(1) | 13(1) |
| C(4)  | 11449(1) | 4162(1)  | 2465(1) | 16(1) |
| C(5)  | 10727(1) | 5783(1)  | 2349(1) | 16(1) |
| C(6)  | 8447(1)  | 7723(1)  | 1957(1) | 14(1) |
| C(7)  | 9089(2)  | 8650(1)  | 1451(1) | 20(1) |
| C(8)  | 8493(2)  | 10140(1) | 1433(1) | 25(1) |
| C(9)  | 7284(2)  | 10678(1) | 1916(1) | 27(1) |

|       |           |          |         |       |
|-------|-----------|----------|---------|-------|
| C(10) | 6653(2)   | 9733(1)  | 2413(1) | 26(1) |
| C(11) | 7232(2)   | 8235(1)  | 2436(1) | 19(1) |
| C(12) | 12196(1)  | 1861(1)  | 1894(1) | 17(1) |
| C(13) | 12952(2)  | -236(1)  | 1296(1) | 28(1) |
| C(14) | 7581(1)   | 5861(1)  | 999(1)  | 12(1) |
| C(15) | 7188(1)   | 6851(1)  | 363(1)  | 14(1) |
| C(16) | 5706(1)   | 7172(1)  | 92(1)   | 16(1) |
| C(17) | 4606(1)   | 6514(1)  | 470(1)  | 14(1) |
| C(18) | 4991(1)   | 5517(1)  | 1107(1) | 15(1) |
| C(19) | 6479(1)   | 5186(1)  | 1359(1) | 14(1) |
| C(20) | 3039(1)   | 6840(1)  | 223(1)  | 16(1) |
| C(1A) | 11096(5)  | -626(5)  | 6365(2) | 60(1) |
| C(1B) | 10444(7)  | -254(8)  | 5588(3) | 29(1) |
| C(1C) | 9346(10)  | -886(9)  | 5383(4) | 31(2) |
| C(1D) | 8771(12)  | -544(11) | 4689(5) | 39(2) |
| C(1E) | 9302(8)   | 412(8)   | 4180(3) | 34(1) |
| C(1F) | 10426(13) | 1054(11) | 4371(4) | 32(2) |
| C(1G) | 10974(9)  | 738(10)  | 5071(4) | 26(2) |

---

Table S40. Bond lengths [Å] and angles [°] for 007c-20017.

|            |            |
|------------|------------|
| S(1)-O(3)  | 1.4378(9)  |
| S(1)-O(4)  | 1.4431(8)  |
| S(1)-O(2)  | 1.4659(9)  |
| S(1)-C(21) | 1.8089(11) |
| N(3)-O(9)  | 1.2247(13) |
| N(3)-O(10) | 1.2255(13) |
| N(3)-C(22) | 1.4798(14) |
| N(4)-O(7)  | 1.2215(13) |
| N(4)-O(8)  | 1.2253(13) |
| N(4)-C(24) | 1.4744(14) |
| N(5)-O(6)  | 1.2217(13) |
| N(5)-O(5)  | 1.2228(13) |



|             |            |
|-------------|------------|
| N(5)-C(26)  | 1.4783(14) |
| C(21)-C(26) | 1.3932(15) |
| C(21)-C(22) | 1.3960(15) |
| C(22)-C(23) | 1.3842(15) |
| C(23)-C(24) | 1.3796(16) |
| C(23)-H(23) | 0.9500     |
| C(24)-C(25) | 1.3813(16) |
| C(25)-C(26) | 1.3823(15) |
| C(25)-H(25) | 0.9500     |
| O(1)-C(13)  | 1.4191(14) |
| O(1)-C(12)  | 1.4196(14) |
| N(1)-C(6)   | 1.4829(14) |
| N(1)-C(5)   | 1.5204(14) |
| N(1)-C(1)   | 1.5314(13) |
| N(1)-H(1)   | 0.895(16)  |
| C(1)-C(14)  | 1.5165(15) |
| C(1)-C(2)   | 1.5310(14) |
| C(1)-H(1A)  | 1.0000     |
| C(2)-C(3)   | 1.5286(15) |
| C(2)-H(2A)  | 0.9900     |
| C(2)-H(2B)  | 0.9900     |
| N(2)-C(20)  | 1.1482(16) |
| C(3)-C(12)  | 1.5174(15) |
| C(3)-C(4)   | 1.5311(15) |
| C(3)-H(3)   | 1.0000     |
| C(4)-C(5)   | 1.5165(16) |
| C(4)-H(4A)  | 0.9900     |
| C(4)-H(4B)  | 0.9900     |
| C(5)-H(5A)  | 0.9900     |
| C(5)-H(5B)  | 0.9900     |
| C(6)-C(11)  | 1.3828(17) |
| C(6)-C(7)   | 1.3904(16) |
| C(7)-C(8)   | 1.3910(17) |
| C(7)-H(7)   | 0.9500     |
| C(8)-C(9)   | 1.391(2)   |

|              |            |
|--------------|------------|
| C(8)-H(8)    | 0.9500     |
| C(9)-C(10)   | 1.3872(19) |
| C(9)-H(9)    | 0.9500     |
| C(10)-C(11)  | 1.3964(17) |
| C(10)-H(10)  | 0.9500     |
| C(11)-H(11)  | 0.9500     |
| C(12)-H(12A) | 0.9900     |
| C(12)-H(12B) | 0.9900     |
| C(13)-H(13A) | 0.9800     |
| C(13)-H(13B) | 0.9800     |
| C(13)-H(13C) | 0.9800     |
| C(14)-C(19)  | 1.3938(16) |
| C(14)-C(15)  | 1.3950(15) |
| C(15)-C(16)  | 1.3917(16) |
| C(15)-H(15)  | 0.9500     |
| C(16)-C(17)  | 1.3948(16) |
| C(16)-H(16)  | 0.9500     |
| C(17)-C(18)  | 1.3986(16) |
| C(17)-C(20)  | 1.4456(16) |
| C(18)-C(19)  | 1.3827(16) |
| C(18)-H(18)  | 0.9500     |
| C(19)-H(19)  | 0.9500     |
| C(1A)-C(1B)  | 1.531(6)   |
| C(1A)-H(1AA) | 0.9800     |
| C(1A)-H(1AB) | 0.9800     |
| C(1A)-H(1AC) | 0.9800     |
| C(1B)-C(1C)  | 1.378(13)  |
| C(1B)-C(1G)  | 1.392(14)  |
| C(1C)-C(1D)  | 1.364(7)   |
| C(1C)-H(1C)  | 0.9500     |
| C(1D)-C(1E)  | 1.362(16)  |
| C(1D)-H(1D)  | 0.9500     |
| C(1E)-C(1F)  | 1.394(16)  |
| C(1E)-H(1E)  | 0.9500     |
| C(1F)-C(1G)  | 1.366(6)   |

|                   |            |
|-------------------|------------|
| C(1F)-H(1F)       | 0.9500     |
| C(1G)-H(1G)       | 0.9500     |
| O(3)-S(1)-O(4)    | 115.44(5)  |
| O(3)-S(1)-O(2)    | 113.53(5)  |
| O(4)-S(1)-O(2)    | 112.63(5)  |
| O(3)-S(1)-C(21)   | 107.16(5)  |
| O(4)-S(1)-C(21)   | 104.82(5)  |
| O(2)-S(1)-C(21)   | 101.70(5)  |
| O(9)-N(3)-O(10)   | 125.24(10) |
| O(9)-N(3)-C(22)   | 117.33(10) |
| O(10)-N(3)-C(22)  | 117.41(10) |
| O(7)-N(4)-O(8)    | 124.71(10) |
| O(7)-N(4)-C(24)   | 117.65(10) |
| O(8)-N(4)-C(24)   | 117.65(10) |
| O(6)-N(5)-O(5)    | 125.52(10) |
| O(6)-N(5)-C(26)   | 117.17(9)  |
| O(5)-N(5)-C(26)   | 117.24(9)  |
| C(26)-C(21)-C(22) | 115.19(10) |
| C(26)-C(21)-S(1)  | 122.05(8)  |
| C(22)-C(21)-S(1)  | 122.23(8)  |
| C(23)-C(22)-C(21) | 123.82(10) |
| C(23)-C(22)-N(3)  | 115.70(10) |
| C(21)-C(22)-N(3)  | 120.47(10) |
| C(24)-C(23)-C(22) | 117.06(10) |
| C(24)-C(23)-H(23) | 121.5      |
| C(22)-C(23)-H(23) | 121.5      |
| C(23)-C(24)-C(25) | 122.90(10) |
| C(23)-C(24)-N(4)  | 118.93(10) |
| C(25)-C(24)-N(4)  | 118.17(10) |
| C(24)-C(25)-C(26) | 117.12(10) |
| C(24)-C(25)-H(25) | 121.4      |
| C(26)-C(25)-H(25) | 121.4      |
| C(25)-C(26)-C(21) | 123.89(10) |
| C(25)-C(26)-N(5)  | 115.57(10) |

|                  |           |
|------------------|-----------|
| C(21)-C(26)-N(5) | 120.53(9) |
| C(13)-O(1)-C(12) | 112.25(9) |
| C(6)-N(1)-C(5)   | 109.66(8) |
| C(6)-N(1)-C(1)   | 114.12(8) |
| C(5)-N(1)-C(1)   | 111.58(8) |
| C(6)-N(1)-H(1)   | 107.9(9)  |
| C(5)-N(1)-H(1)   | 106.4(9)  |
| C(1)-N(1)-H(1)   | 106.8(9)  |
| C(14)-C(1)-C(2)  | 112.65(9) |
| C(14)-C(1)-N(1)  | 109.30(8) |
| C(2)-C(1)-N(1)   | 108.98(8) |
| C(14)-C(1)-H(1A) | 108.6     |
| C(2)-C(1)-H(1A)  | 108.6     |
| N(1)-C(1)-H(1A)  | 108.6     |
| C(3)-C(2)-C(1)   | 112.56(9) |
| C(3)-C(2)-H(2A)  | 109.1     |
| C(1)-C(2)-H(2A)  | 109.1     |
| C(3)-C(2)-H(2B)  | 109.1     |
| C(1)-C(2)-H(2B)  | 109.1     |
| H(2A)-C(2)-H(2B) | 107.8     |
| C(12)-C(3)-C(2)  | 111.40(9) |
| C(12)-C(3)-C(4)  | 110.13(9) |
| C(2)-C(3)-C(4)   | 109.36(9) |
| C(12)-C(3)-H(3)  | 108.6     |
| C(2)-C(3)-H(3)   | 108.6     |
| C(4)-C(3)-H(3)   | 108.6     |
| C(5)-C(4)-C(3)   | 111.70(9) |
| C(5)-C(4)-H(4A)  | 109.3     |
| C(3)-C(4)-H(4A)  | 109.3     |
| C(5)-C(4)-H(4B)  | 109.3     |
| C(3)-C(4)-H(4B)  | 109.3     |
| H(4A)-C(4)-H(4B) | 107.9     |
| C(4)-C(5)-N(1)   | 111.78(9) |
| C(4)-C(5)-H(5A)  | 109.3     |
| N(1)-C(5)-H(5A)  | 109.3     |

|                     |            |
|---------------------|------------|
| C(4)-C(5)-H(5B)     | 109.3      |
| N(1)-C(5)-H(5B)     | 109.3      |
| H(5A)-C(5)-H(5B)    | 107.9      |
| C(11)-C(6)-C(7)     | 122.08(11) |
| C(11)-C(6)-N(1)     | 118.45(10) |
| C(7)-C(6)-N(1)      | 119.37(10) |
| C(6)-C(7)-C(8)      | 118.66(11) |
| C(6)-C(7)-H(7)      | 120.7      |
| C(8)-C(7)-H(7)      | 120.7      |
| C(9)-C(8)-C(7)      | 120.18(12) |
| C(9)-C(8)-H(8)      | 119.9      |
| C(7)-C(8)-H(8)      | 119.9      |
| C(10)-C(9)-C(8)     | 120.24(12) |
| C(10)-C(9)-H(9)     | 119.9      |
| C(8)-C(9)-H(9)      | 119.9      |
| C(9)-C(10)-C(11)    | 120.32(12) |
| C(9)-C(10)-H(10)    | 119.8      |
| C(11)-C(10)-H(10)   | 119.8      |
| C(6)-C(11)-C(10)    | 118.52(11) |
| C(6)-C(11)-H(11)    | 120.7      |
| C(10)-C(11)-H(11)   | 120.7      |
| O(1)-C(12)-C(3)     | 108.44(9)  |
| O(1)-C(12)-H(12A)   | 110.0      |
| C(3)-C(12)-H(12A)   | 110.0      |
| O(1)-C(12)-H(12B)   | 110.0      |
| C(3)-C(12)-H(12B)   | 110.0      |
| H(12A)-C(12)-H(12B) | 108.4      |
| O(1)-C(13)-H(13A)   | 109.5      |
| O(1)-C(13)-H(13B)   | 109.5      |
| H(13A)-C(13)-H(13B) | 109.5      |
| O(1)-C(13)-H(13C)   | 109.5      |
| H(13A)-C(13)-H(13C) | 109.5      |
| H(13B)-C(13)-H(13C) | 109.5      |
| C(19)-C(14)-C(15)   | 119.44(10) |
| C(19)-C(14)-C(1)    | 119.64(10) |

|                     |            |
|---------------------|------------|
| C(15)-C(14)-C(1)    | 120.91(10) |
| C(16)-C(15)-C(14)   | 120.40(11) |
| C(16)-C(15)-H(15)   | 119.8      |
| C(14)-C(15)-H(15)   | 119.8      |
| C(15)-C(16)-C(17)   | 119.39(10) |
| C(15)-C(16)-H(16)   | 120.3      |
| C(17)-C(16)-H(16)   | 120.3      |
| C(16)-C(17)-C(18)   | 120.57(10) |
| C(16)-C(17)-C(20)   | 121.53(10) |
| C(18)-C(17)-C(20)   | 117.90(10) |
| C(19)-C(18)-C(17)   | 119.29(11) |
| C(19)-C(18)-H(18)   | 120.4      |
| C(17)-C(18)-H(18)   | 120.4      |
| C(18)-C(19)-C(14)   | 120.86(10) |
| C(18)-C(19)-H(19)   | 119.6      |
| C(14)-C(19)-H(19)   | 119.6      |
| N(2)-C(20)-C(17)    | 176.56(12) |
| C(1B)-C(1A)-H(1AA)  | 109.5      |
| C(1B)-C(1A)-H(1AB)  | 109.5      |
| H(1AA)-C(1A)-H(1AB) | 109.5      |
| C(1B)-C(1A)-H(1AC)  | 109.5      |
| H(1AA)-C(1A)-H(1AC) | 109.5      |
| H(1AB)-C(1A)-H(1AC) | 109.5      |
| C(1C)-C(1B)-C(1G)   | 118.7(5)   |
| C(1C)-C(1B)-C(1A)   | 121.6(6)   |
| C(1G)-C(1B)-C(1A)   | 119.7(6)   |
| C(1D)-C(1C)-C(1B)   | 121.1(7)   |
| C(1D)-C(1C)-H(1C)   | 119.5      |
| C(1B)-C(1C)-H(1C)   | 119.5      |
| C(1E)-C(1D)-C(1C)   | 120.3(9)   |
| C(1E)-C(1D)-H(1D)   | 119.8      |
| C(1C)-C(1D)-H(1D)   | 119.8      |
| C(1D)-C(1E)-C(1F)   | 119.7(5)   |
| C(1D)-C(1E)-H(1E)   | 120.1      |
| C(1F)-C(1E)-H(1E)   | 120.1      |

|                   |          |
|-------------------|----------|
| C(1G)-C(1F)-C(1E) | 119.9(8) |
| C(1G)-C(1F)-H(1F) | 120.0    |
| C(1E)-C(1F)-H(1F) | 120.0    |
| C(1F)-C(1G)-C(1B) | 120.2(7) |
| C(1F)-C(1G)-H(1G) | 119.9    |
| C(1B)-C(1G)-H(1G) | 119.9    |

---

Symmetry transformations used to generate equivalent atoms:

Table S41. Anisotropic displacement parameters ( $\text{\AA}^2 \times 10^3$ ) for 007c-20017. The anisotropic displacement factor exponent takes the form:  $-2\pi^2 [h^2 a^* 2U_{11} + \dots + 2 h k a^* b^* U_{12}]$

|      | U11             | U22   | U33   | U23   | U13   |
|------|-----------------|-------|-------|-------|-------|
|      | U12             |       |       |       |       |
| S(1) | 14(1)<br>-4(1)  | 12(1) | 10(1) | -1(1) | 1(1)  |
| O(2) | 17(1)<br>-7(1)  | 20(1) | 12(1) | -1(1) | 3(1)  |
| N(3) | 18(1)<br>-10(1) | 18(1) | 12(1) | -4(1) | 1(1)  |
| O(3) | 22(1)<br>0(1)   | 16(1) | 18(1) | 1(1)  | 1(1)  |
| O(4) | 23(1)<br>-10(1) | 21(1) | 12(1) | -4(1) | 0(1)  |
| N(4) | 21(1)<br>-5(1)  | 14(1) | 14(1) | -1(1) | -3(1) |
| N(5) | 17(1)<br>-9(1)  | 18(1) | 12(1) | -1(1) | -1(1) |
| O(5) | 14(1)<br>-4(1)  | 28(1) | 20(1) | -3(1) | -3(1) |
| O(6) | 36(1)<br>-15(1) | 18(1) | 30(1) | -2(1) | -9(1) |
| O(7) | 32(1)<br>-13(1) | 20(1) | 18(1) | 4(1)  | -3(1) |

|       |        |       |       |       |       |
|-------|--------|-------|-------|-------|-------|
| O(8)  | 28(1)  | 26(1) | 19(1) | -1(1) | -9(1) |
|       | -11(1) |       |       |       |       |
| O(9)  | 29(1)  | 14(1) | 24(1) | -1(1) | 2(1)  |
|       | -10(1) |       |       |       |       |
| O(10) | 15(1)  | 29(1) | 24(1) | -3(1) | 1(1)  |
|       | -12(1) |       |       |       |       |
| C(21) | 12(1)  | 10(1) | 11(1) | -2(1) | 1(1)  |
|       | -2(1)  |       |       |       |       |
| C(22) | 13(1)  | 12(1) | 14(1) | -3(1) | 3(1)  |
|       | -5(1)  |       |       |       |       |
| C(23) | 14(1)  | 15(1) | 14(1) | -4(1) | -1(1) |
|       | -4(1)  |       |       |       |       |
| C(24) | 16(1)  | 12(1) | 11(1) | -2(1) | 0(1)  |
|       | -2(1)  |       |       |       |       |
| C(25) | 14(1)  | 10(1) | 13(1) | -2(1) | 1(1)  |
|       | -4(1)  |       |       |       |       |
| C(26) | 12(1)  | 12(1) | 13(1) | -4(1) | 0(1)  |
|       | -3(1)  |       |       |       |       |
| O(1)  | 28(1)  | 13(1) | 17(1) | -3(1) | 2(1)  |
|       | -1(1)  |       |       |       |       |
| N(1)  | 14(1)  | 11(1) | 11(1) | -3(1) | 1(1)  |
|       | -5(1)  |       |       |       |       |
| C(1)  | 13(1)  | 12(1) | 10(1) | -2(1) | 1(1)  |
|       | -5(1)  |       |       |       |       |
| C(2)  | 13(1)  | 12(1) | 13(1) | -2(1) | -1(1) |
|       | -3(1)  |       |       |       |       |
| N(2)  | 18(1)  | 25(1) | 18(1) | -3(1) | -2(1) |
|       | -6(1)  |       |       |       |       |
| C(3)  | 13(1)  | 14(1) | 13(1) | -2(1) | -1(1) |
|       | -3(1)  |       |       |       |       |
| C(4)  | 18(1)  | 18(1) | 14(1) | -3(1) | -4(1) |
|       | -4(1)  |       |       |       |       |
| C(5)  | 16(1)  | 19(1) | 17(1) | -6(1) | -3(1) |
|       | -6(1)  |       |       |       |       |
| C(6)  | 17(1)  | 11(1) | 16(1) | -3(1) | -1(1) |



|       |        |       |       |        |       |
|-------|--------|-------|-------|--------|-------|
|       | -5(1)  |       |       |        |       |
| C(7)  | 23(1)  | 16(1) | 20(1) | -4(1)  | 6(1)  |
|       | -8(1)  |       |       |        |       |
| C(8)  | 32(1)  | 15(1) | 28(1) | 0(1)   | 6(1)  |
|       | -10(1) |       |       |        |       |
| C(9)  | 31(1)  | 12(1) | 38(1) | -4(1)  | 4(1)  |
|       | -4(1)  |       |       |        |       |
| C(10) | 25(1)  | 18(1) | 33(1) | -7(1)  | 9(1)  |
|       | -3(1)  |       |       |        |       |
| C(11) | 21(1)  | 16(1) | 22(1) | -2(1)  | 4(1)  |
|       | -7(1)  |       |       |        |       |
| C(12) | 19(1)  | 16(1) | 15(1) | -1(1)  | -2(1) |
|       | -1(1)  |       |       |        |       |
| C(13) | 32(1)  | 15(1) | 34(1) | -7(1)  | -3(1) |
|       | 0(1)   |       |       |        |       |
| C(14) | 13(1)  | 12(1) | 11(1) | -4(1)  | 0(1)  |
|       | -3(1)  |       |       |        |       |
| C(15) | 16(1)  | 14(1) | 14(1) | -1(1)  | 2(1)  |
|       | -5(1)  |       |       |        |       |
| C(16) | 18(1)  | 14(1) | 13(1) | -1(1)  | -2(1) |
|       | -3(1)  |       |       |        |       |
| C(17) | 13(1)  | 15(1) | 14(1) | -6(1)  | 0(1)  |
|       | -2(1)  |       |       |        |       |
| C(18) | 16(1)  | 18(1) | 14(1) | -3(1)  | 2(1)  |
|       | -8(1)  |       |       |        |       |
| C(19) | 17(1)  | 16(1) | 11(1) | -1(1)  | 0(1)  |
|       | -6(1)  |       |       |        |       |
| C(20) | 19(1)  | 16(1) | 13(1) | -4(1)  | 0(1)  |
|       | -5(1)  |       |       |        |       |
| C(1A) | 50(2)  | 71(3) | 39(2) | -17(2) | -9(2) |
|       | 27(2)  |       |       |        |       |
| C(1B) | 21(2)  | 35(2) | 26(3) | -13(2) | -5(2) |
|       | 9(2)   |       |       |        |       |
| C(1C) | 24(3)  | 19(3) | 47(6) | -3(4)  | 11(4) |
|       | -5(2)  |       |       |        |       |

|       |                |       |       |        |        |
|-------|----------------|-------|-------|--------|--------|
| C(1D) | 18(3)<br>-4(2) | 35(4) | 70(7) | -25(4) | -7(3)  |
| C(1E) | 29(3)<br>11(2) | 40(3) | 29(3) | -17(3) | -14(2) |
| C(1F) | 40(4)<br>0(2)  | 17(2) | 32(4) | -1(2)  | 8(3)   |
| C(1G) | 18(4)<br>-5(2) | 25(3) | 37(4) | -11(3) | 3(3)   |

---

Table S42. Hydrogen coordinates (x 104) and isotropic displacement parameters ( $\text{\AA}^2 \times 10^3$ ) for 007c-20017.

|        | x     | y     | z    | U(eq) |
|--------|-------|-------|------|-------|
| H(23)  | 8583  | 3644  | 5635 | 17    |
| H(25)  | 5272  | 1449  | 5567 | 15    |
| H(1A)  | 9872  | 5943  | 927  | 14    |
| H(2A)  | 9229  | 3401  | 1789 | 15    |
| H(2B)  | 9971  | 3444  | 966  | 15    |
| H(3)   | 12219 | 3917  | 1381 | 16    |
| H(4A)  | 10832 | 3691  | 2846 | 20    |
| H(4B)  | 12506 | 3981  | 2648 | 20    |
| H(5A)  | 11412 | 6268  | 2014 | 20    |
| H(5B)  | 10634 | 6166  | 2829 | 20    |
| H(7)   | 9918  | 8274  | 1124 | 23    |
| H(8)   | 8913  | 10791 | 1089 | 30    |
| H(9)   | 6889  | 11696 | 1906 | 33    |
| H(10)  | 5823  | 10108 | 2740 | 31    |
| H(11)  | 6801  | 7582  | 2774 | 23    |
| H(12A) | 13229 | 1648  | 2108 | 20    |
| H(12B) | 11515 | 1412  | 2250 | 20    |
| H(13A) | 12967 | -592  | 818  | 41    |
| H(13B) | 12318 | -711  | 1657 | 41    |
| H(13C) | 14009 | -458  | 1470 | 41    |

|        |          |          |         |       |
|--------|----------|----------|---------|-------|
| H(15)  | 7937     | 7309     | 113     | 17    |
| H(16)  | 5445     | 7832     | -346    | 19    |
| H(18)  | 4239     | 5072     | 1363    | 18    |
| H(19)  | 6754     | 4489     | 1783    | 17    |
| H(1)   | 8552(17) | 5700(16) | 2344(8) | 18(4) |
| H(1AA) | 10589    | 141      | 6665    | 90    |
| H(1AB) | 12211    | -706     | 6331    | 90    |
| H(1AC) | 10904    | -1552    | 6597    | 90    |
| H(1C)  | 8982     | -1571    | 5729    | 37    |
| H(1D)  | 7998     | -975     | 4561    | 47    |
| H(1E)  | 8907     | 641      | 3696    | 41    |
| H(1F)  | 10811    | 1710     | 4016    | 38    |
| H(1G)  | 11718    | 1197     | 5205    | 31    |

---

Table S43. Torsion angles [°] for 007c-20017.

|                         |             |
|-------------------------|-------------|
| O(3)-S(1)-C(21)-C(26)   | 98.48(10)   |
| O(4)-S(1)-C(21)-C(26)   | -24.67(10)  |
| O(2)-S(1)-C(21)-C(26)   | -142.14(9)  |
| O(3)-S(1)-C(21)-C(22)   | -90.31(10)  |
| O(4)-S(1)-C(21)-C(22)   | 146.54(9)   |
| O(2)-S(1)-C(21)-C(22)   | 29.07(10)   |
| C(26)-C(21)-C(22)-C(23) | 1.39(16)    |
| S(1)-C(21)-C(22)-C(23)  | -170.38(9)  |
| C(26)-C(21)-C(22)-N(3)  | -178.52(9)  |
| S(1)-C(21)-C(22)-N(3)   | 9.71(14)    |
| O(9)-N(3)-C(22)-C(23)   | -116.48(11) |
| O(10)-N(3)-C(22)-C(23)  | 61.73(13)   |
| O(9)-N(3)-C(22)-C(21)   | 63.44(14)   |
| O(10)-N(3)-C(22)-C(21)  | -118.35(12) |
| C(21)-C(22)-C(23)-C(24) | -1.10(17)   |
| N(3)-C(22)-C(23)-C(24)  | 178.81(10)  |
| C(22)-C(23)-C(24)-C(25) | 0.60(17)    |

|                         |             |
|-------------------------|-------------|
| C(22)-C(23)-C(24)-N(4)  | -179.56(10) |
| O(7)-N(4)-C(24)-C(23)   | 178.69(10)  |
| O(8)-N(4)-C(24)-C(23)   | -1.56(15)   |
| O(7)-N(4)-C(24)-C(25)   | -1.46(15)   |
| O(8)-N(4)-C(24)-C(25)   | 178.30(10)  |
| C(23)-C(24)-C(25)-C(26) | -0.46(16)   |
| N(4)-C(24)-C(25)-C(26)  | 179.69(9)   |
| C(24)-C(25)-C(26)-C(21) | 0.81(16)    |
| C(24)-C(25)-C(26)-N(5)  | -178.55(9)  |
| C(22)-C(21)-C(26)-C(25) | -1.24(16)   |
| S(1)-C(21)-C(26)-C(25)  | 170.55(9)   |
| C(22)-C(21)-C(26)-N(5)  | 178.09(9)   |
| S(1)-C(21)-C(26)-N(5)   | -10.12(14)  |
| O(6)-N(5)-C(26)-C(25)   | -61.18(13)  |
| O(5)-N(5)-C(26)-C(25)   | 116.14(11)  |
| O(6)-N(5)-C(26)-C(21)   | 119.43(12)  |
| O(5)-N(5)-C(26)-C(21)   | -63.25(14)  |
| C(6)-N(1)-C(1)-C(14)    | -55.78(12)  |
| C(5)-N(1)-C(1)-C(14)    | 179.22(9)   |
| C(6)-N(1)-C(1)-C(2)     | -179.28(9)  |
| C(5)-N(1)-C(1)-C(2)     | 55.72(11)   |
| C(14)-C(1)-C(2)-C(3)    | -178.96(9)  |
| N(1)-C(1)-C(2)-C(3)     | -57.48(11)  |
| C(1)-C(2)-C(3)-C(12)    | 179.15(9)   |
| C(1)-C(2)-C(3)-C(4)     | 57.18(12)   |
| C(12)-C(3)-C(4)-C(5)    | -177.78(10) |
| C(2)-C(3)-C(4)-C(5)     | -55.05(12)  |
| C(3)-C(4)-C(5)-N(1)     | 55.25(13)   |
| C(6)-N(1)-C(5)-C(4)     | 176.84(9)   |
| C(1)-N(1)-C(5)-C(4)     | -55.71(12)  |
| C(5)-N(1)-C(6)-C(11)    | -107.93(12) |
| C(1)-N(1)-C(6)-C(11)    | 126.05(11)  |
| C(5)-N(1)-C(6)-C(7)     | 68.47(13)   |
| C(1)-N(1)-C(6)-C(7)     | -57.54(14)  |
| C(11)-C(6)-C(7)-C(8)    | 0.50(19)    |

|                         |             |
|-------------------------|-------------|
| N(1)-C(6)-C(7)-C(8)     | -175.77(11) |
| C(6)-C(7)-C(8)-C(9)     | 0.3(2)      |
| C(7)-C(8)-C(9)-C(10)    | -0.8(2)     |
| C(8)-C(9)-C(10)-C(11)   | 0.4(2)      |
| C(7)-C(6)-C(11)-C(10)   | -0.83(19)   |
| N(1)-C(6)-C(11)-C(10)   | 175.47(11)  |
| C(9)-C(10)-C(11)-C(6)   | 0.4(2)      |
| C(13)-O(1)-C(12)-C(3)   | 179.34(10)  |
| C(2)-C(3)-C(12)-O(1)    | 61.15(12)   |
| C(4)-C(3)-C(12)-O(1)    | -177.32(9)  |
| C(2)-C(1)-C(14)-C(19)   | 50.17(13)   |
| N(1)-C(1)-C(14)-C(19)   | -71.13(12)  |
| C(2)-C(1)-C(14)-C(15)   | -128.86(11) |
| N(1)-C(1)-C(14)-C(15)   | 109.84(11)  |
| C(19)-C(14)-C(15)-C(16) | 0.47(16)    |
| C(1)-C(14)-C(15)-C(16)  | 179.51(10)  |
| C(14)-C(15)-C(16)-C(17) | 1.17(17)    |
| C(15)-C(16)-C(17)-C(18) | -1.36(17)   |
| C(15)-C(16)-C(17)-C(20) | 178.31(10)  |
| C(16)-C(17)-C(18)-C(19) | -0.09(17)   |
| C(20)-C(17)-C(18)-C(19) | -179.78(10) |
| C(17)-C(18)-C(19)-C(14) | 1.76(17)    |
| C(15)-C(14)-C(19)-C(18) | -1.96(16)   |
| C(1)-C(14)-C(19)-C(18)  | 178.99(10)  |
| C(1G)-C(1B)-C(1C)-C(1D) | -0.6(10)    |
| C(1A)-C(1B)-C(1C)-C(1D) | 179.9(7)    |
| C(1B)-C(1C)-C(1D)-C(1E) | 1.4(12)     |
| C(1C)-C(1D)-C(1E)-C(1F) | -0.6(12)    |
| C(1D)-C(1E)-C(1F)-C(1G) | -1.0(13)    |
| C(1E)-C(1F)-C(1G)-C(1B) | 1.8(12)     |
| C(1C)-C(1B)-C(1G)-C(1F) | -1.0(9)     |
| C(1A)-C(1B)-C(1G)-C(1F) | 178.5(7)    |

---

Symmetry transformations used to generate equivalent atoms:

Table S44. Hydrogen bonds for 007c-20017 [Å and °].

| D-H...A          | d(D-H)    | d(H...A)  | d(D...A)   | <(DHA)    |
|------------------|-----------|-----------|------------|-----------|
| N(1)-H(1)...O(2) | 0.895(16) | 1.855(16) | 2.7399(13) | 169.5(14) |

Symmetry transformations used to generate equivalent atoms:

## References

- Jiang, J.; Spies, J. A.; Swierk, J. R.; Matula, A. J.; Regan, K. P.; Romano, N.; Brennan, B. J.; Crabtree, R. H.; Batista, V. S.; Schmittenmaer, C. A.; Brudvig, G. W. Direct Interfacial Electron Transfer from High-Potential Porphyrins into Semiconductor Surfaces: A Comparison of Linkers and Anchoring Groups. *J. Phys. Chem. C* **2018**, *122*, 13529.
- Hood, T. S.; Huehls, C. B.; Yang, J. A modular approach to  $\alpha,\beta$ -unsaturated *N*-aryl ketonitrones. *Tetrahedron Lett.* **2012**, *53*, 4679.
- Walker, M. M.; Chen, S.; Mercado, B. Q.; Houk, K. N.; Ellman, J. A. Formation of Aminocyclopentadienes from Silyldihydropyridines: Ring Contractions Driven by Anion Stabilization. *Angew. Chem. Int. Ed.* **2018**, *57*, 6605.
- Niu, Z.; Zhang, W.; Lan, P. C.; Aguila, B.; Ma, S. Promoting Frustrated Lewis Pairs for Heterogeneous Chemoselective Hydrogenation via the Tailored Pore Environment within Metal–Organic Frameworks. *Angew. Chem. Int. Ed.* **2019**, *58*, 7420.
- Feringa, B. L.; Jansen, J. F. G. A. A New Synthesis of Imines via Grignard- and Cuprate Additions to *N*-Trimethylsilylformamides. *Synthesis* **1988**, 184.
- Lu, B.; Li, C.; Zhang, L. Gold-Catalyzed Highly Regioselective Oxidation of C–C Triple Bonds without Acid Additives: Propargyl Moieties as Masked  $\alpha,\beta$ -Unsaturated Carbonyls. *J. Am. Chem. Soc.* **2010**, *132*, 14070.
- Duttwyler, S.; Chen, S.; Takase, M. K.; Wiberg, K. B.; Bergman, R. G.; Ellman, J. A. Proton Donor Acidity Controls Selectivity in Nonaromatic Nitrogen Heterocycle Synthesis. *Science* **2013**, *339*, 678.
- Liang, T.; Nguyen, K. D.; Zhang, W.; Krische, M. J. Enantioselective Ruthenium-Catalyzed Carbonyl Allylation via Alkyne–Alcohol C–C Bond-Forming Transfer Hydrogenation: Allene Hydrometalation vs Oxidative Coupling. *J. Am. Chem. Soc.* **2015**, *137*, 3161.
- Maiti, D.; Fors, B. P.; Henderson, J. L.; Nakamura, Y.; Buchwald, S. L. Palladium-catalyzed coupling of functionalized primary and secondary amines with aryl and heteroaryl halides: two ligands suffice in most cases. *Chem. Sci.* **2011**, *2*, 57.
- McNally, A.; Prier, C. K.; MacMillan, D. W. C. Discovery of an  $\alpha$ -Amino C–H Arylation Reaction Using the Strategy of Accelerated Serendipity. *Science* **2011**, *334*, 1114.
- Pitre, S. P.; McTiernan, C. D.; Vine, W.; DiPucchio, R.; Grenier, M.; Scaiano, J. C. Visible-Light Actinometry and Intermittent Illumination as Convenient Tools to Study Ru(bpy)<sub>3</sub>Cl<sub>2</sub> Mediated Photoredox Transformations. *Sci. Rep.* **2015**, *5*, 16397.
- Frisch, M. J.; Trucks, G. W.; Schlegel, H. B.; Scuseria, G. E.; Robb, M. A.; Cheeseman, J. R.; Scalmani, G.; Barone, V.; Mennucci, B.; Petersson, G. A.; Nakatsuji, H.; Caricato, M.; Li, X.; Hratchian, H. P.; Izmaylov, A. F.; Bloino, J.; Zheng, G.; Sonnenberg, J. L.; Hada, M.; Ehara, M.; Toyota, K.; Fukuda, R.; Hasegawa, J.; Ishida, M.; Nakajima, T.; Honda, Y.; Kitao, O.; Nakai, H.; Vreven, T.; Montgomery, J. A., Jr.; Peralta, J. E.; Ogliaro, F.; Bearpark, M.; Heyd, J. J.; Brothers, E.; Kudin, K. N.; Staroverov, V. N.; Kobayashi, R.; Normand, J.; Raghavachari, K.; Rendell, A.; Burant, J. C.; Iyengar, S. S.; Tomasi, J.; Cossi, M.; Rega, N.; Millam, J. M.; Klene, M.; Knox, J. E.; Cross, J. B.; Bakken, V.; Adamo, C.; Jaramillo, J.; Gomperts, R.; Stratmann, R. E.; Yazyev, O.; Austin, A. J.; Cammi, R.; Pomelli, C.; Ochterski, J. W.; Martin, R. L.; Morokuma, K.; Zakrzewski, V. G.; Voth, G. A.; Salvador, P.; Dannenberg, J. J.; Dapprich, S.; Daniels, A. D.; Farkas, Foresman, J. B.; Ortiz, J. V.; Cioslowski, J.; Fox, D. J. Gaussian 09; Gaussian Inc.: Wallingford, CT, **2009**.
- Chai, J. D.; Head-Gordon, M. Long-Range Corrected Hybrid Density Functionals with Damped Atom-Atom Dispersion Corrections. *Phys. Chem. Chem. Phys.* **2008**, *10*, 6615.
- (a) Barone, V.; Cossi, M. Quantum Calculation of Molecular Energies and Energy Gradients in Solution by a Conductor Solvent Model. *J. Phys. Chem. A* **1998**, *102*, 1995. (b) Cossi, M.; Rega, N.; Scalmani, G.; Barone, V. Energies, Structures,

- and Electronic Properties of Molecules in Solution With the C-PCM Solvation Model. *J. Comput. Chem.* **2003**, *24*, 669.
- (c) Takano, Y.; Houk, K. N. Benchmarking the Conductor-like Polarizable Continuum Model (CPCM) for Aqueous Solvation Free Energies of Neutral and Ionic Organic Molecules. *J. Chem. Theory Comput.* **2005**, *1*, 70.
15. Bootsma, A. N.; Wheeler, S. Popular Integration Grids Can Result in Large Errors in DFT-Computed Free Energies. *ChemRxiv*. **2019**, Preprint.
16. Grimme, S., Supramolecular Binding Thermodynamics by Dispersion-Corrected Density Functional Theory. *Chem. Eur. J.* **2012**, *18*, 9955.
17. Legault, C. Y. CYLview, 1.0b; Université de Sherbrooke, **2009**; <http://www.cylview.org>.

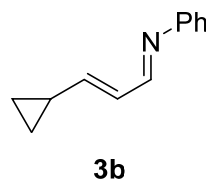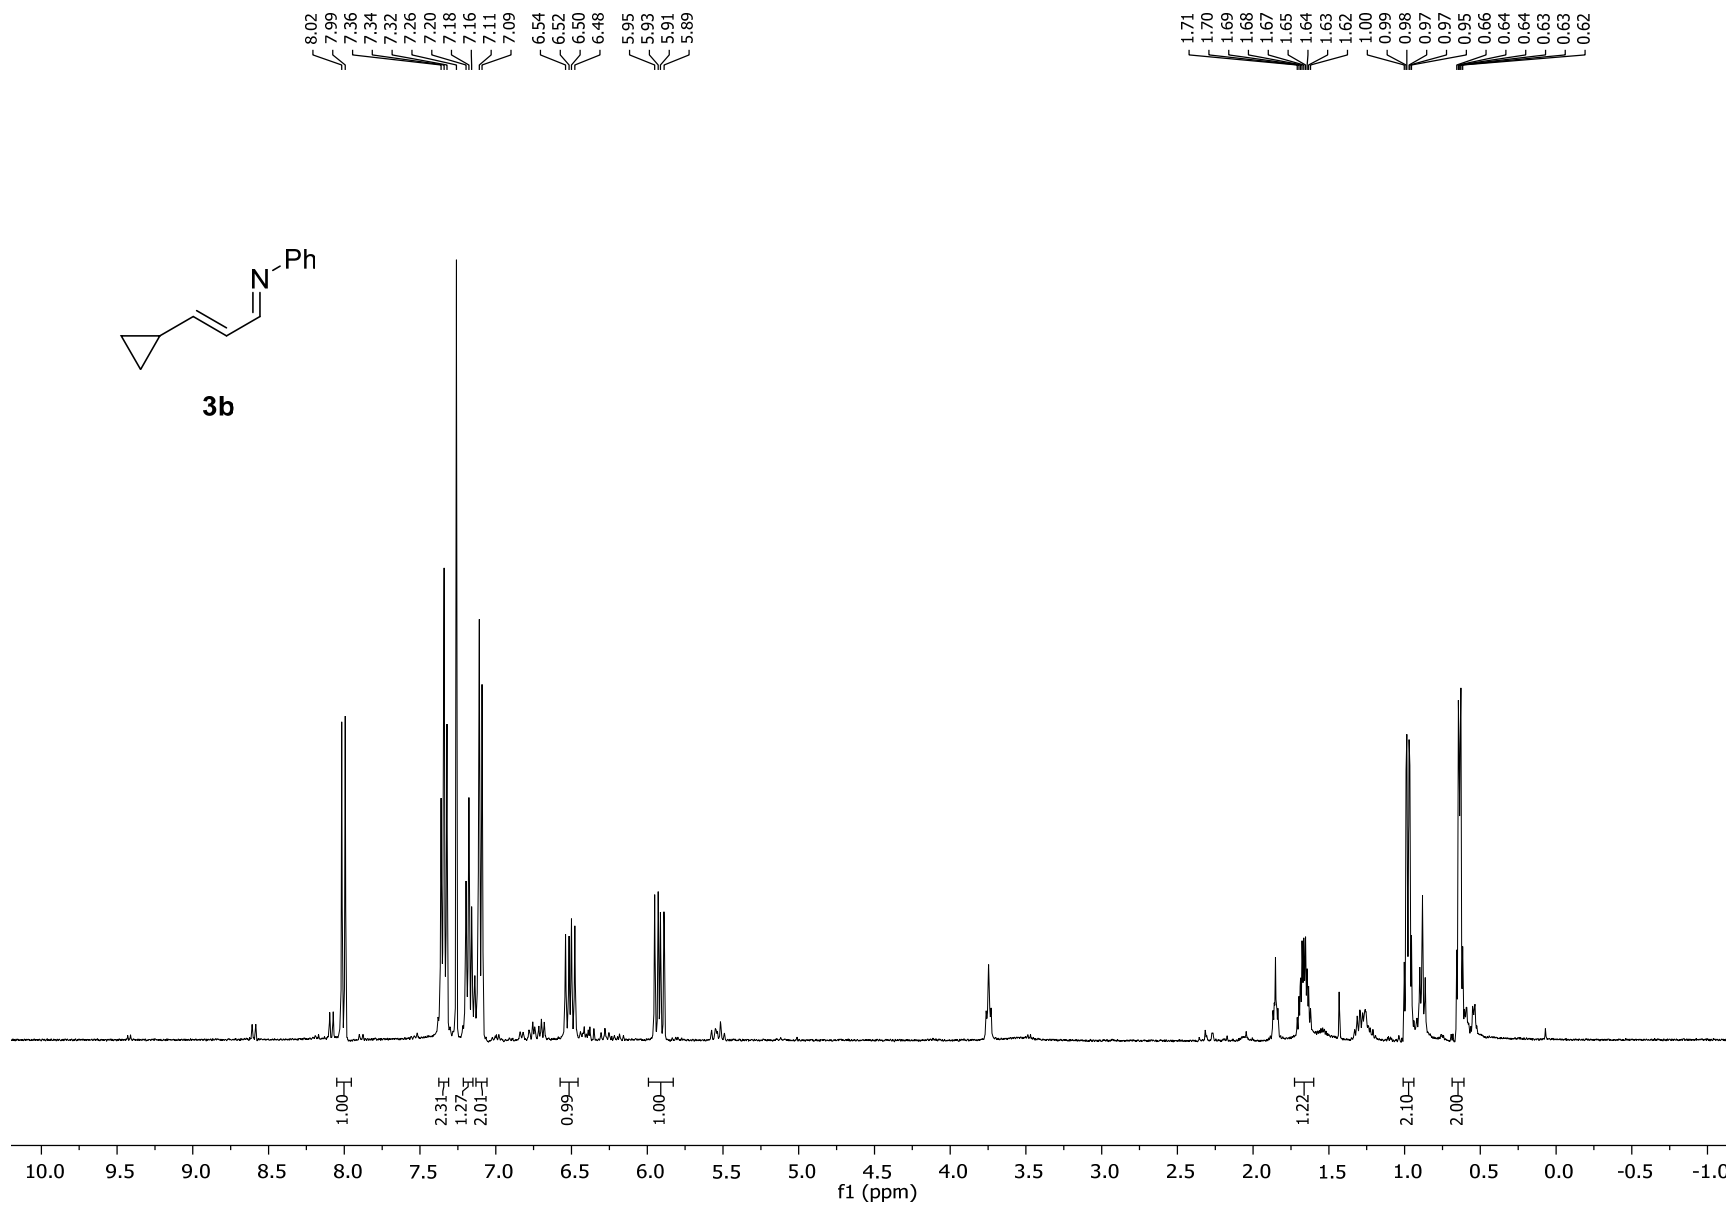



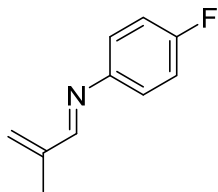

**3i**

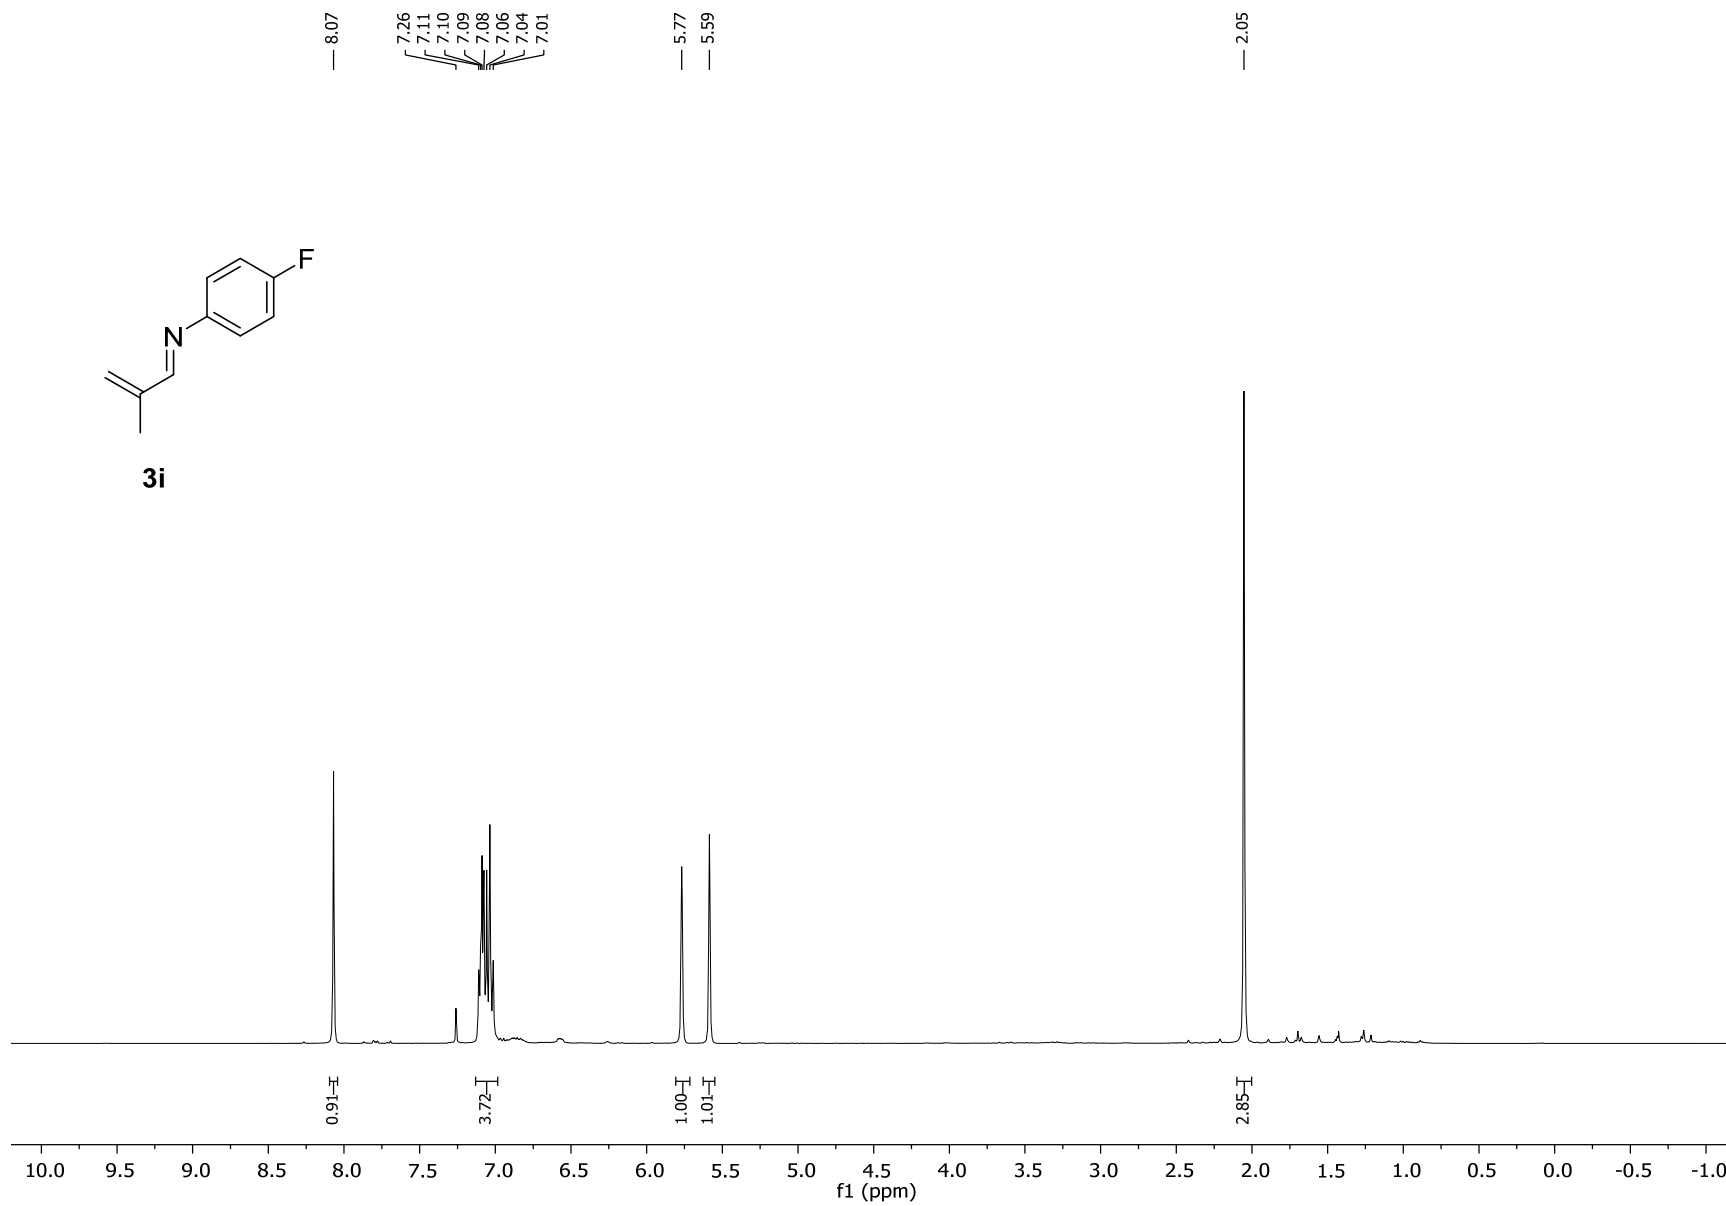

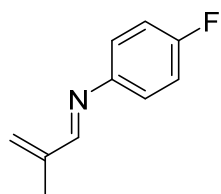

**3i**

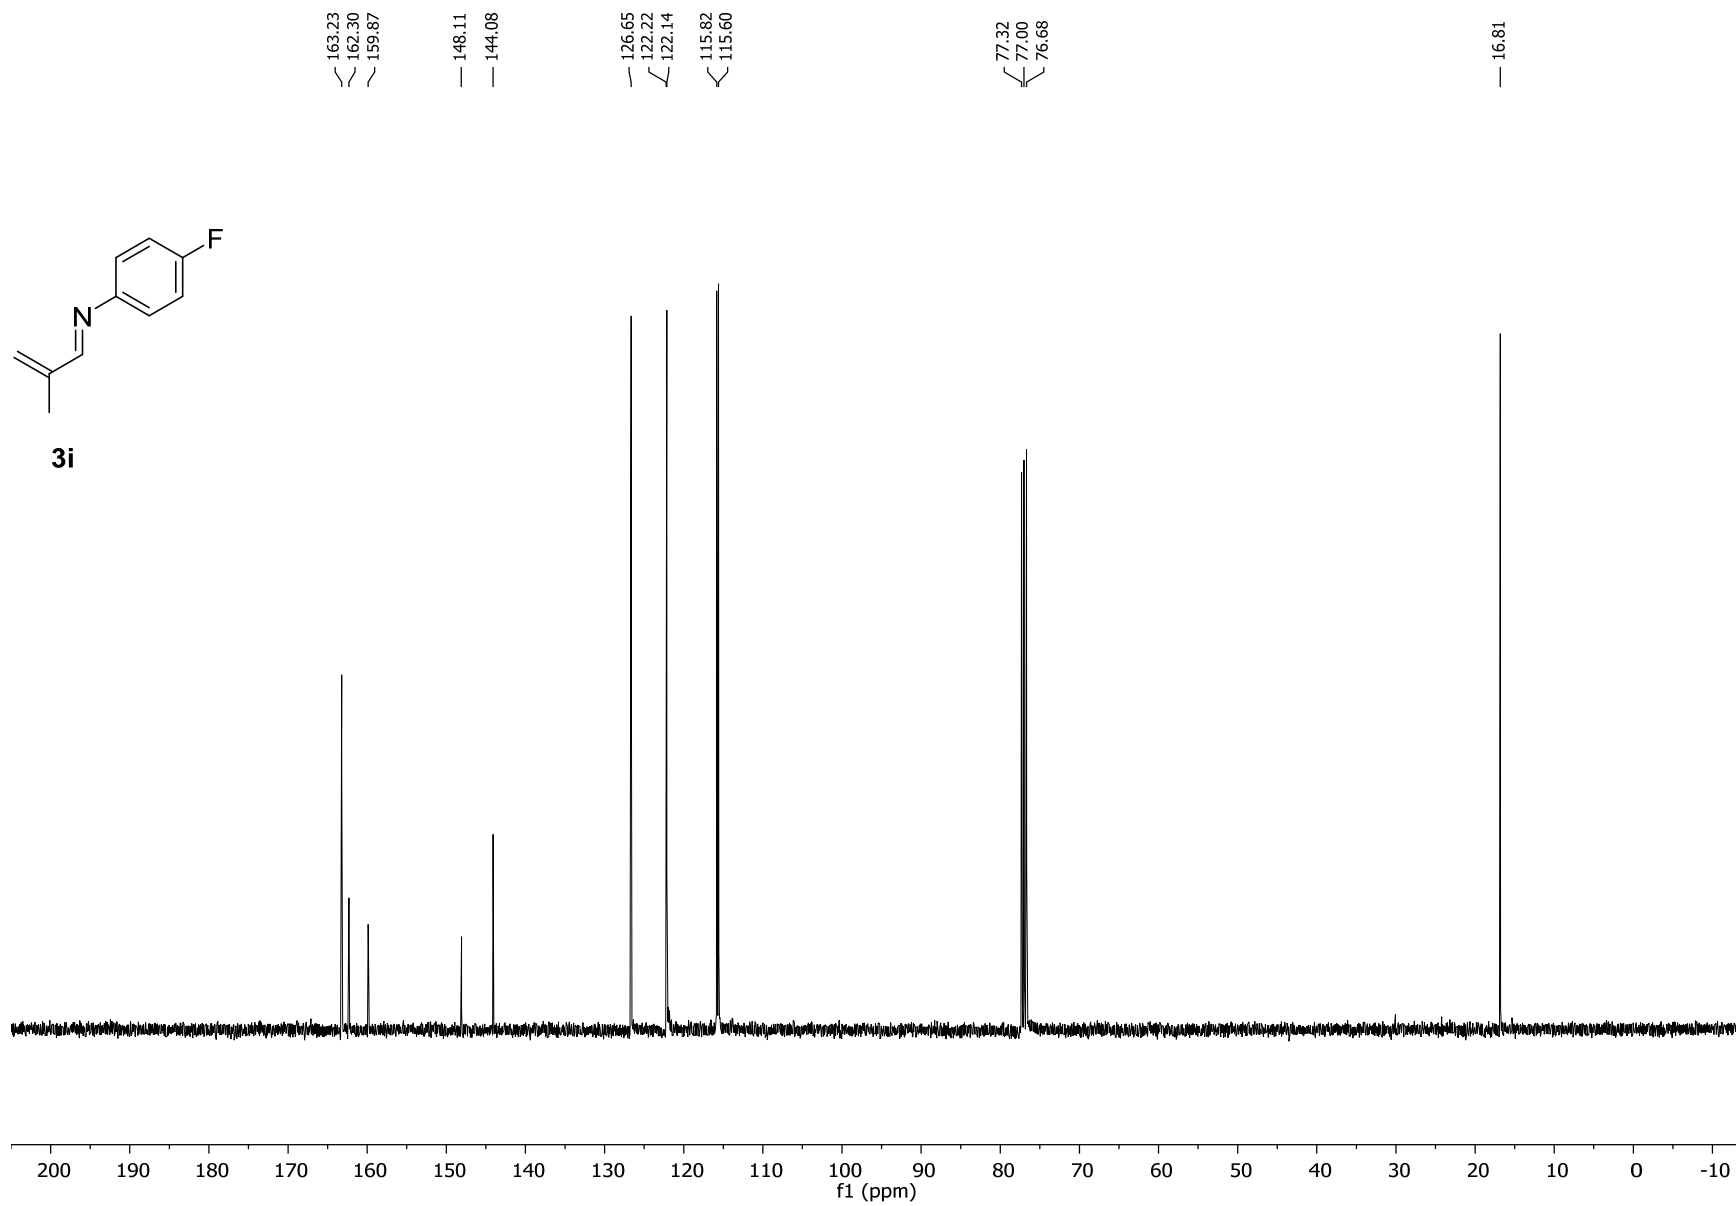

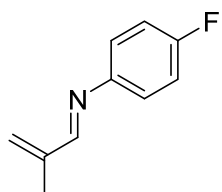

**3i**

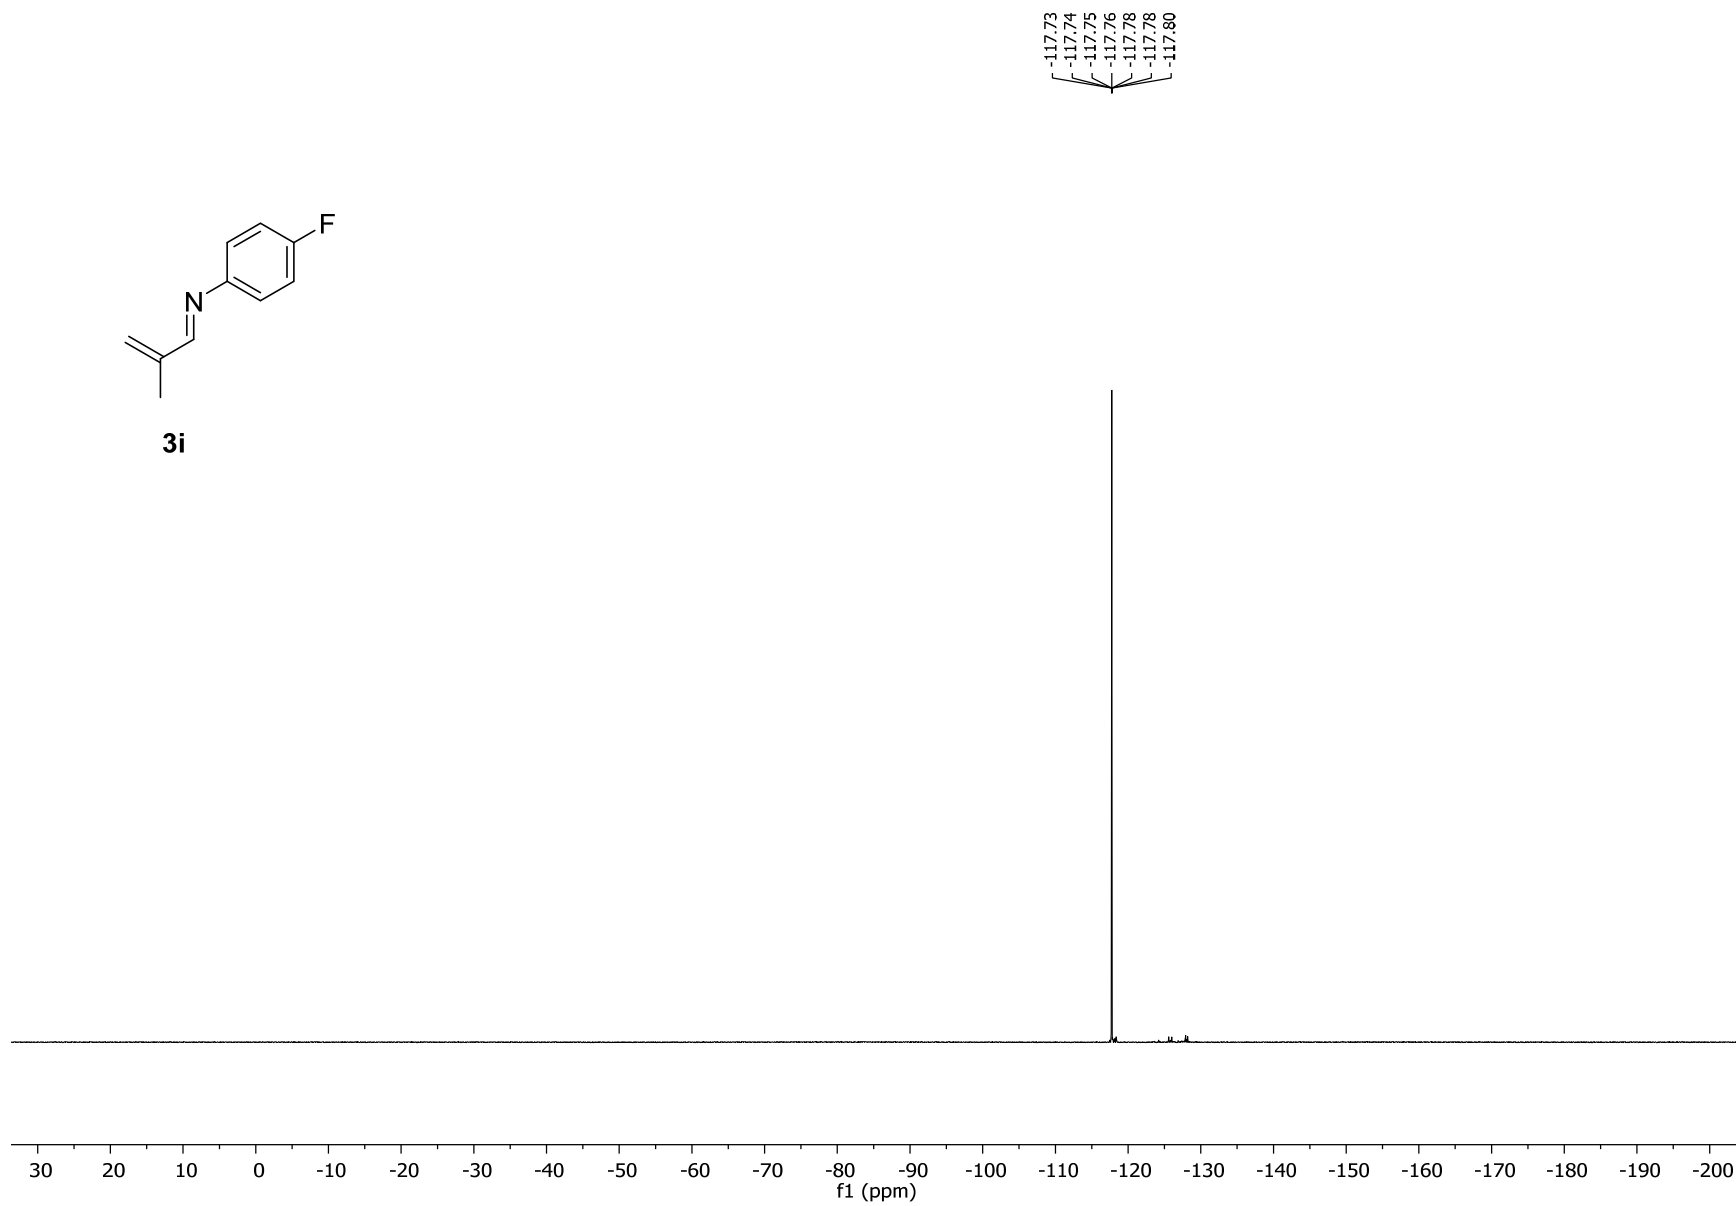

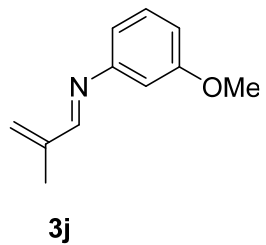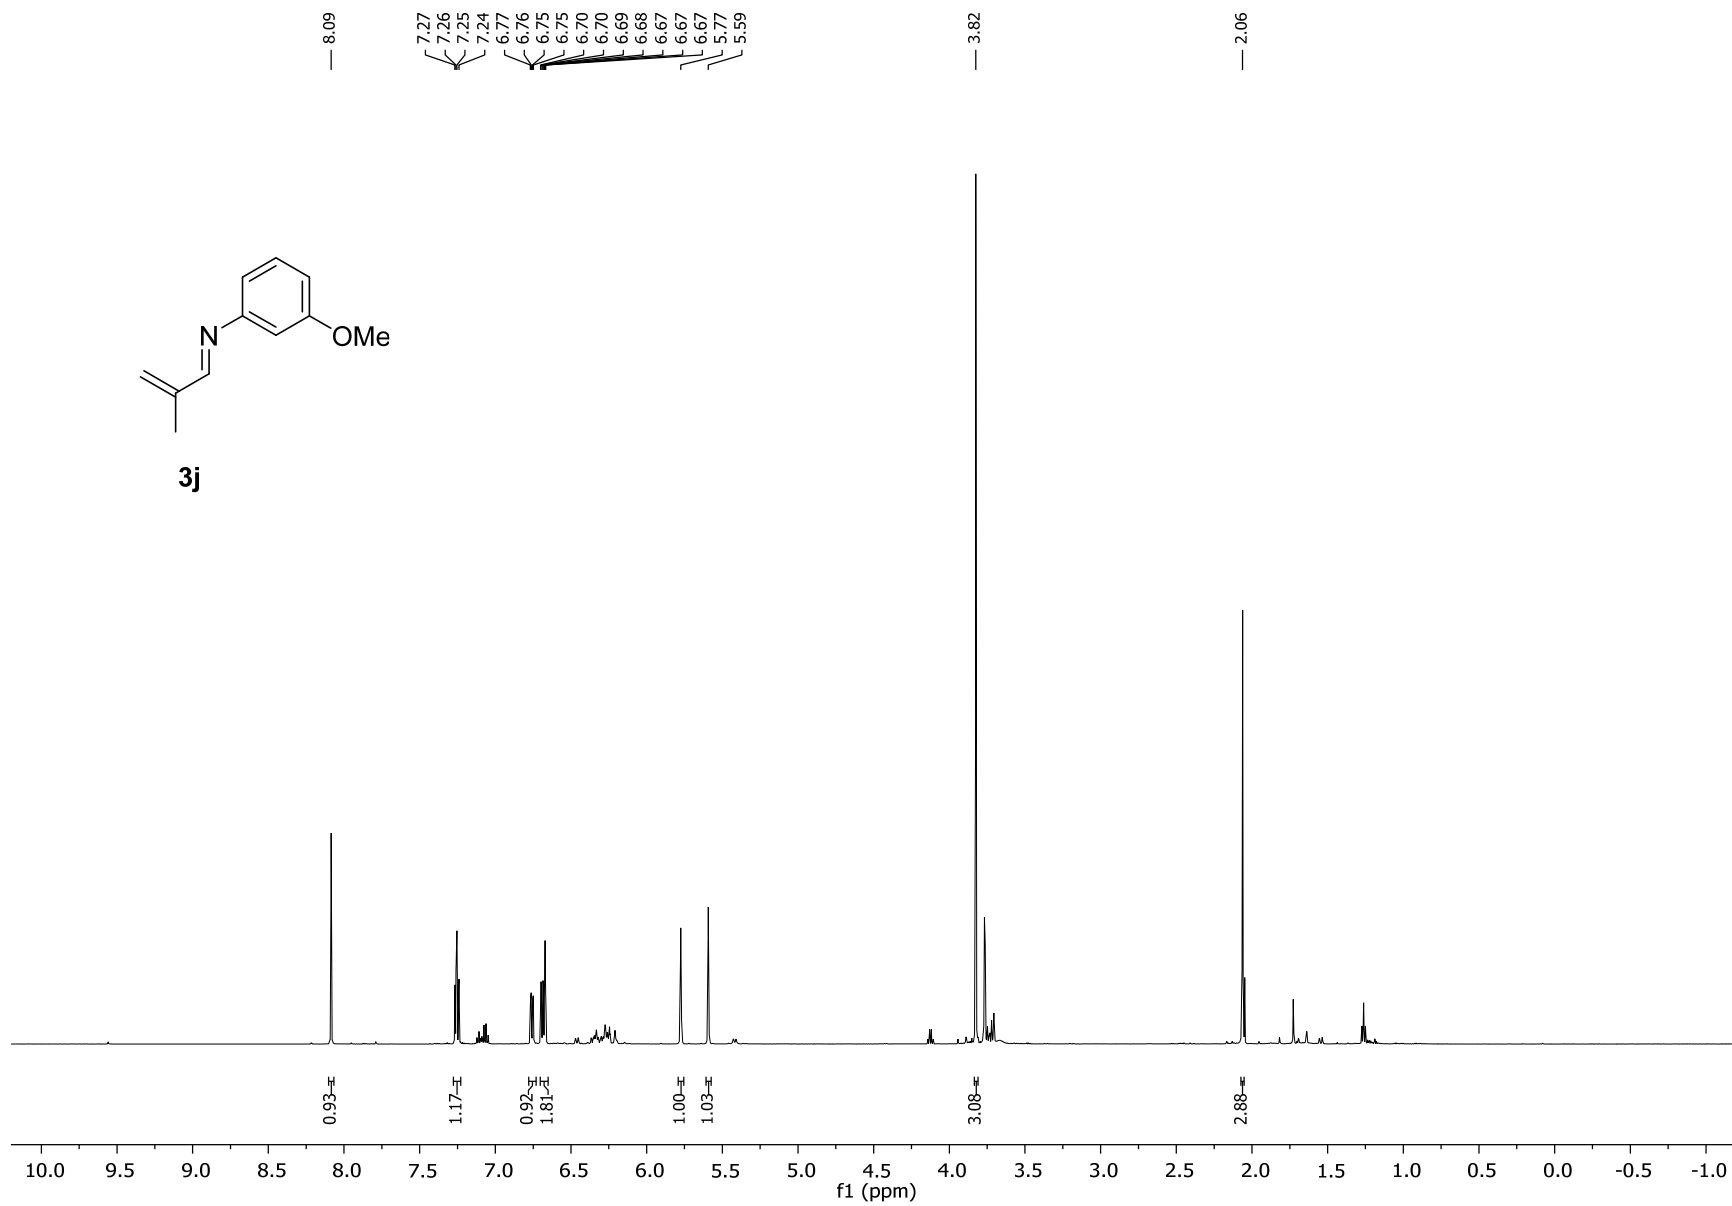

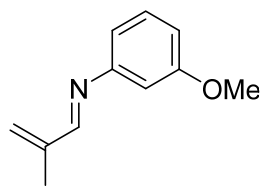

3j

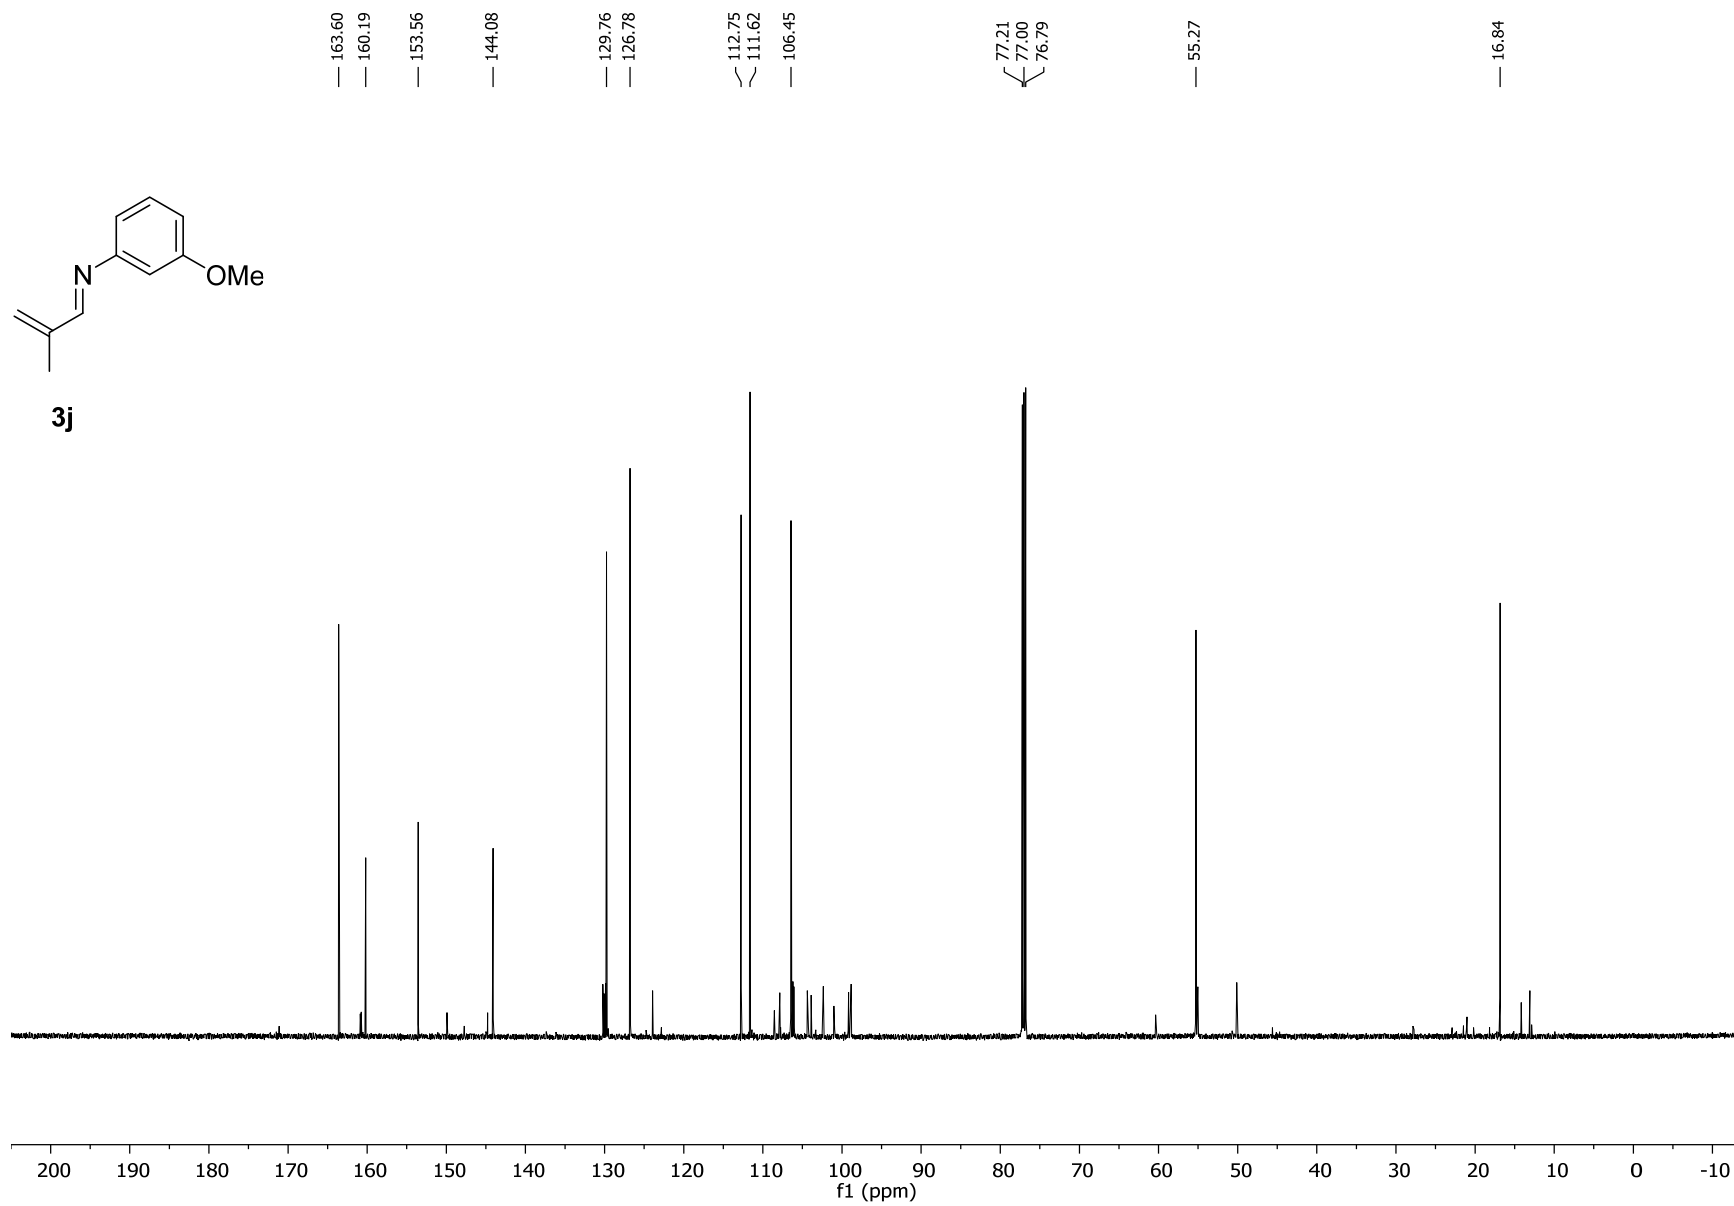

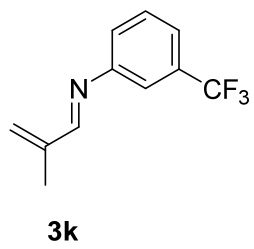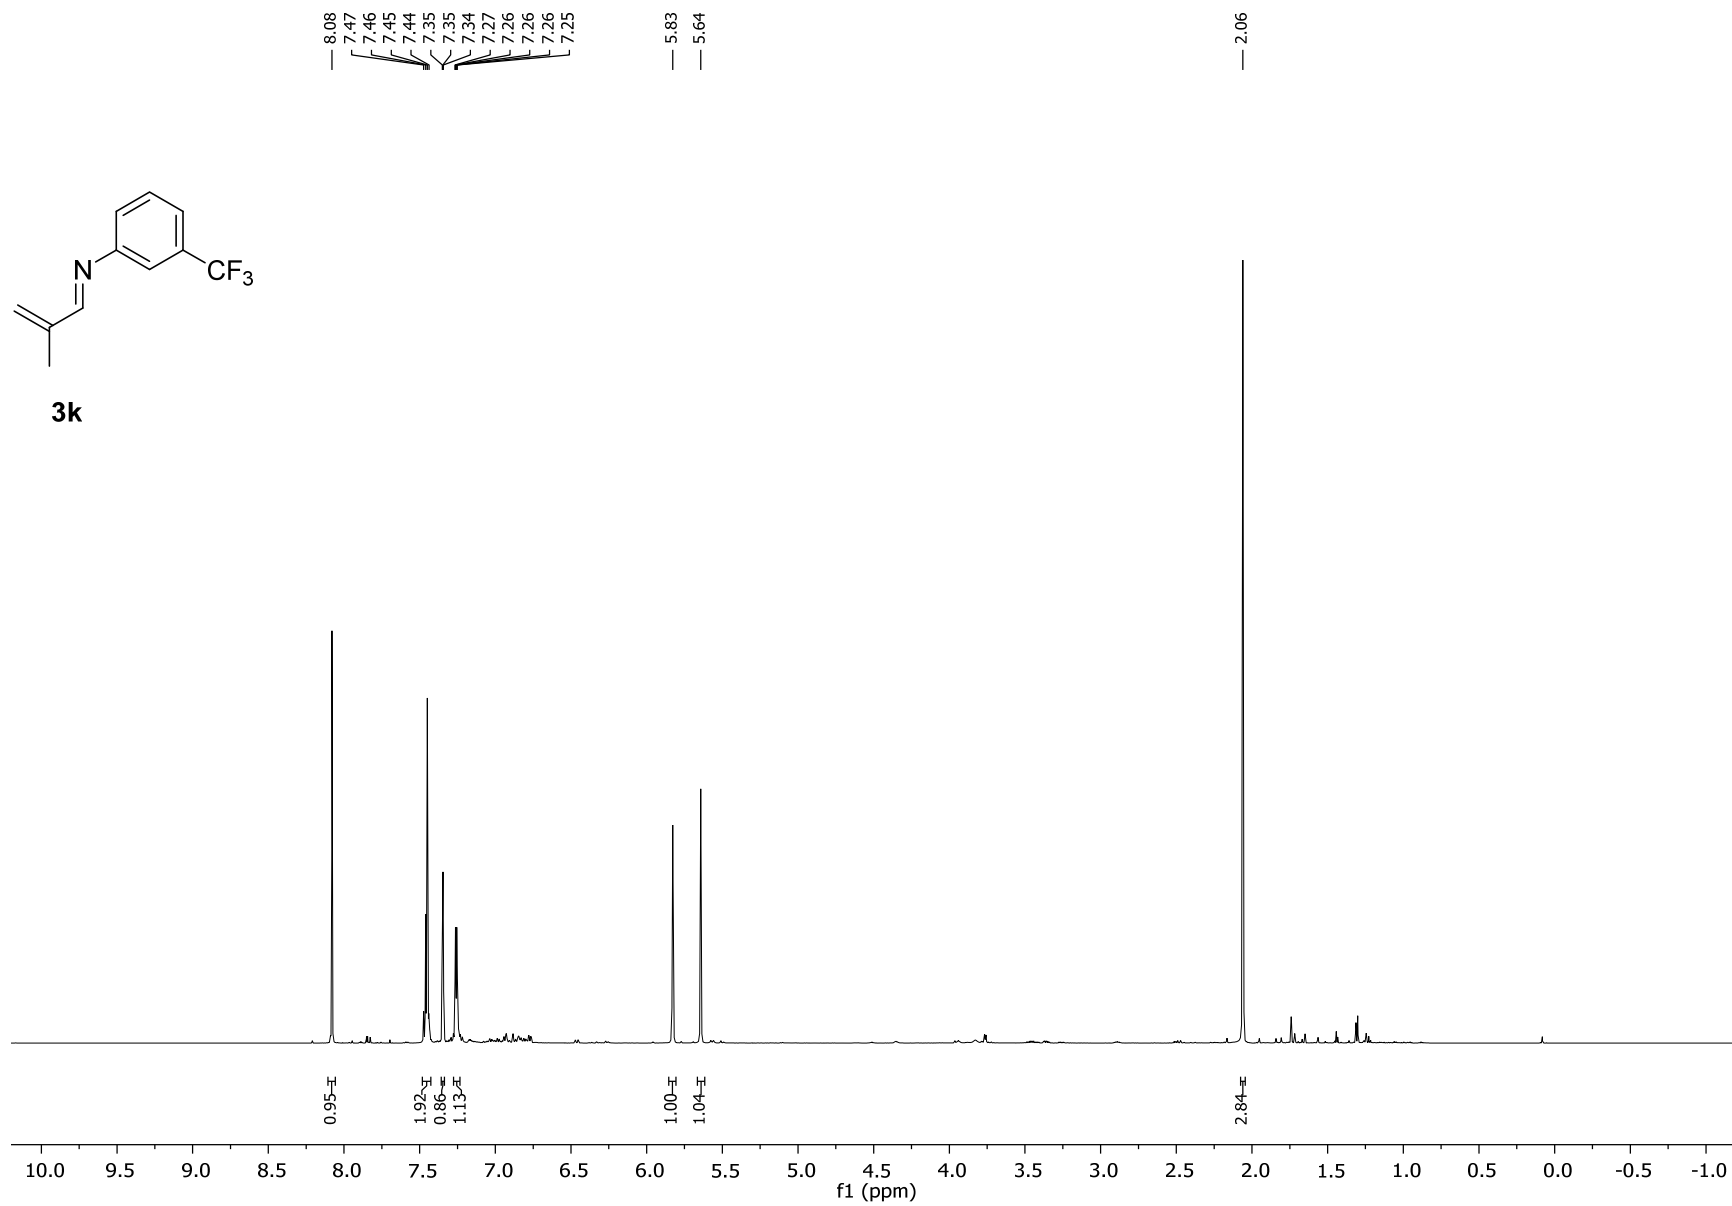

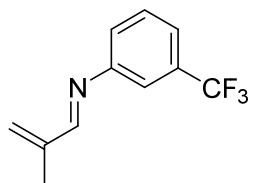

3k

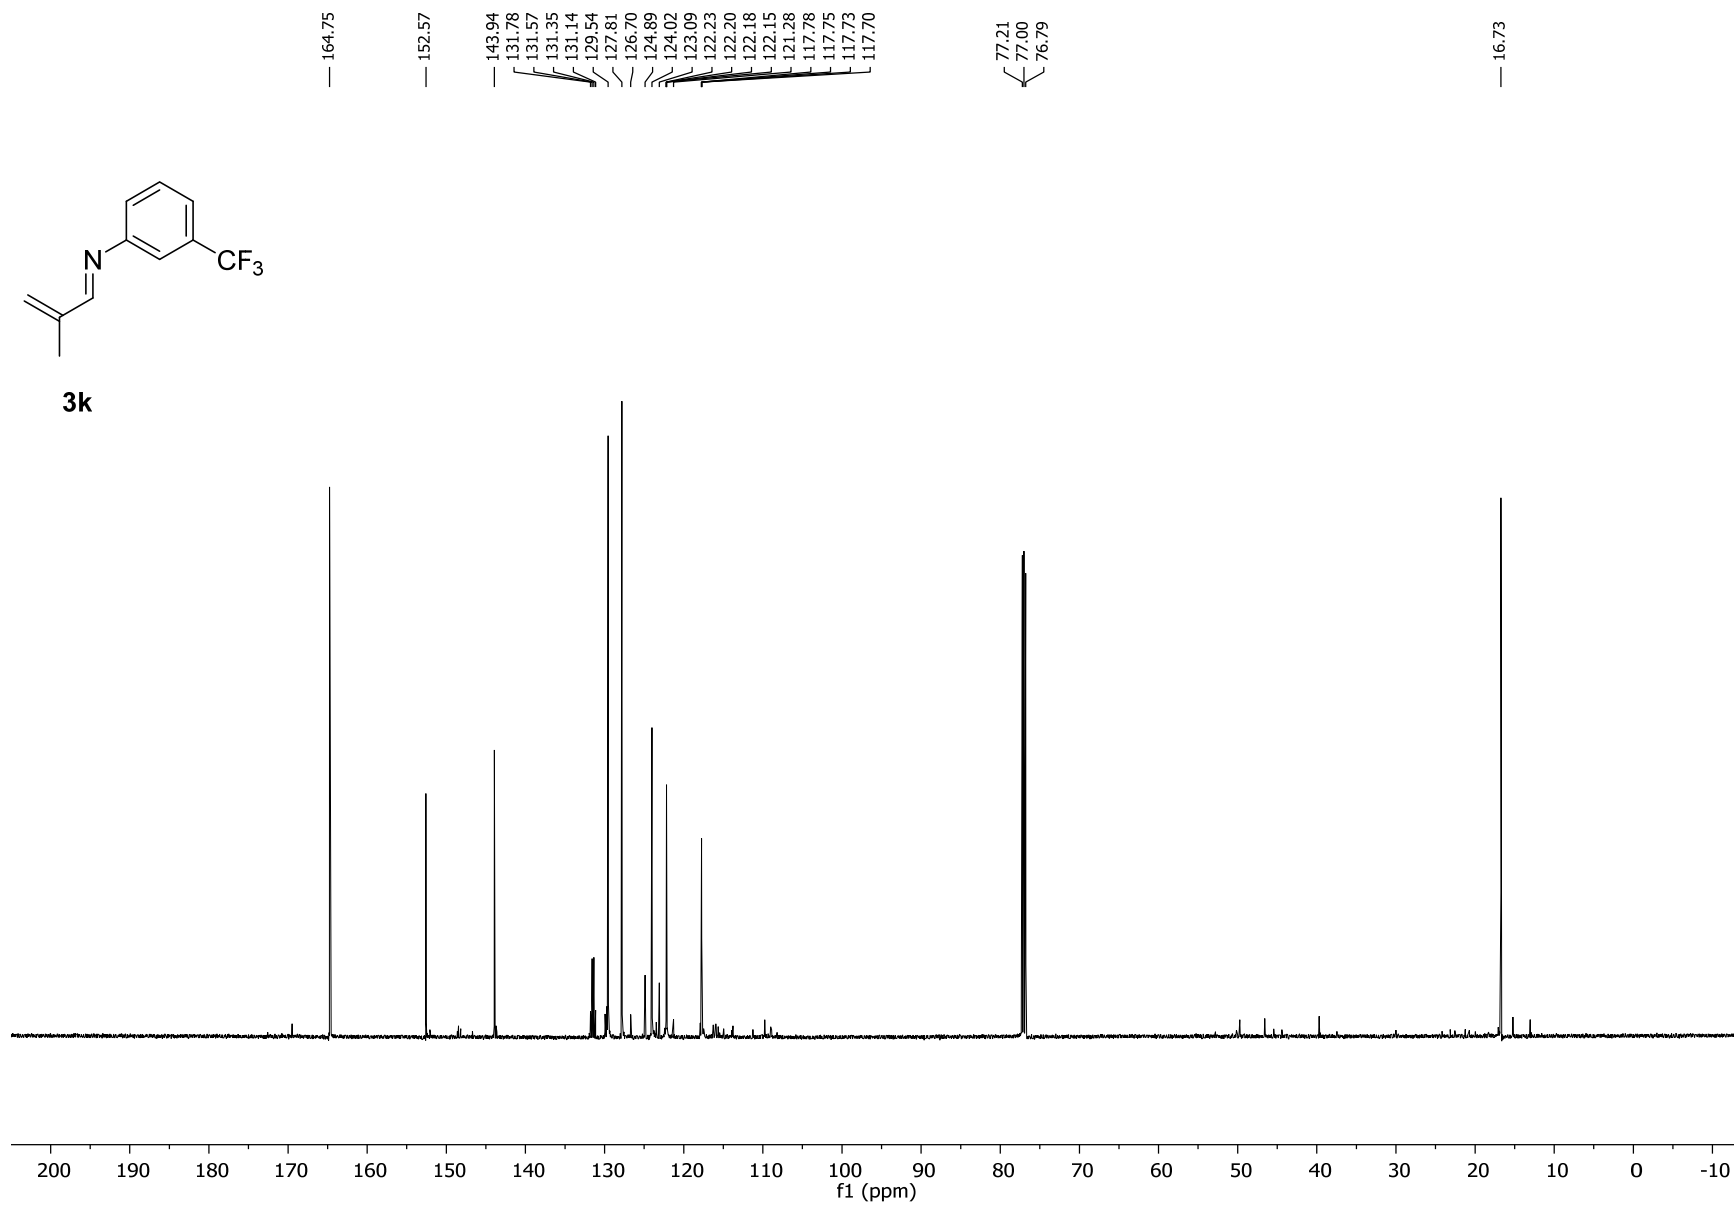

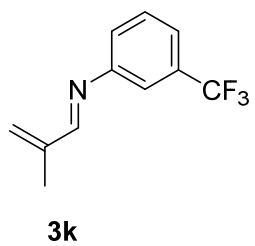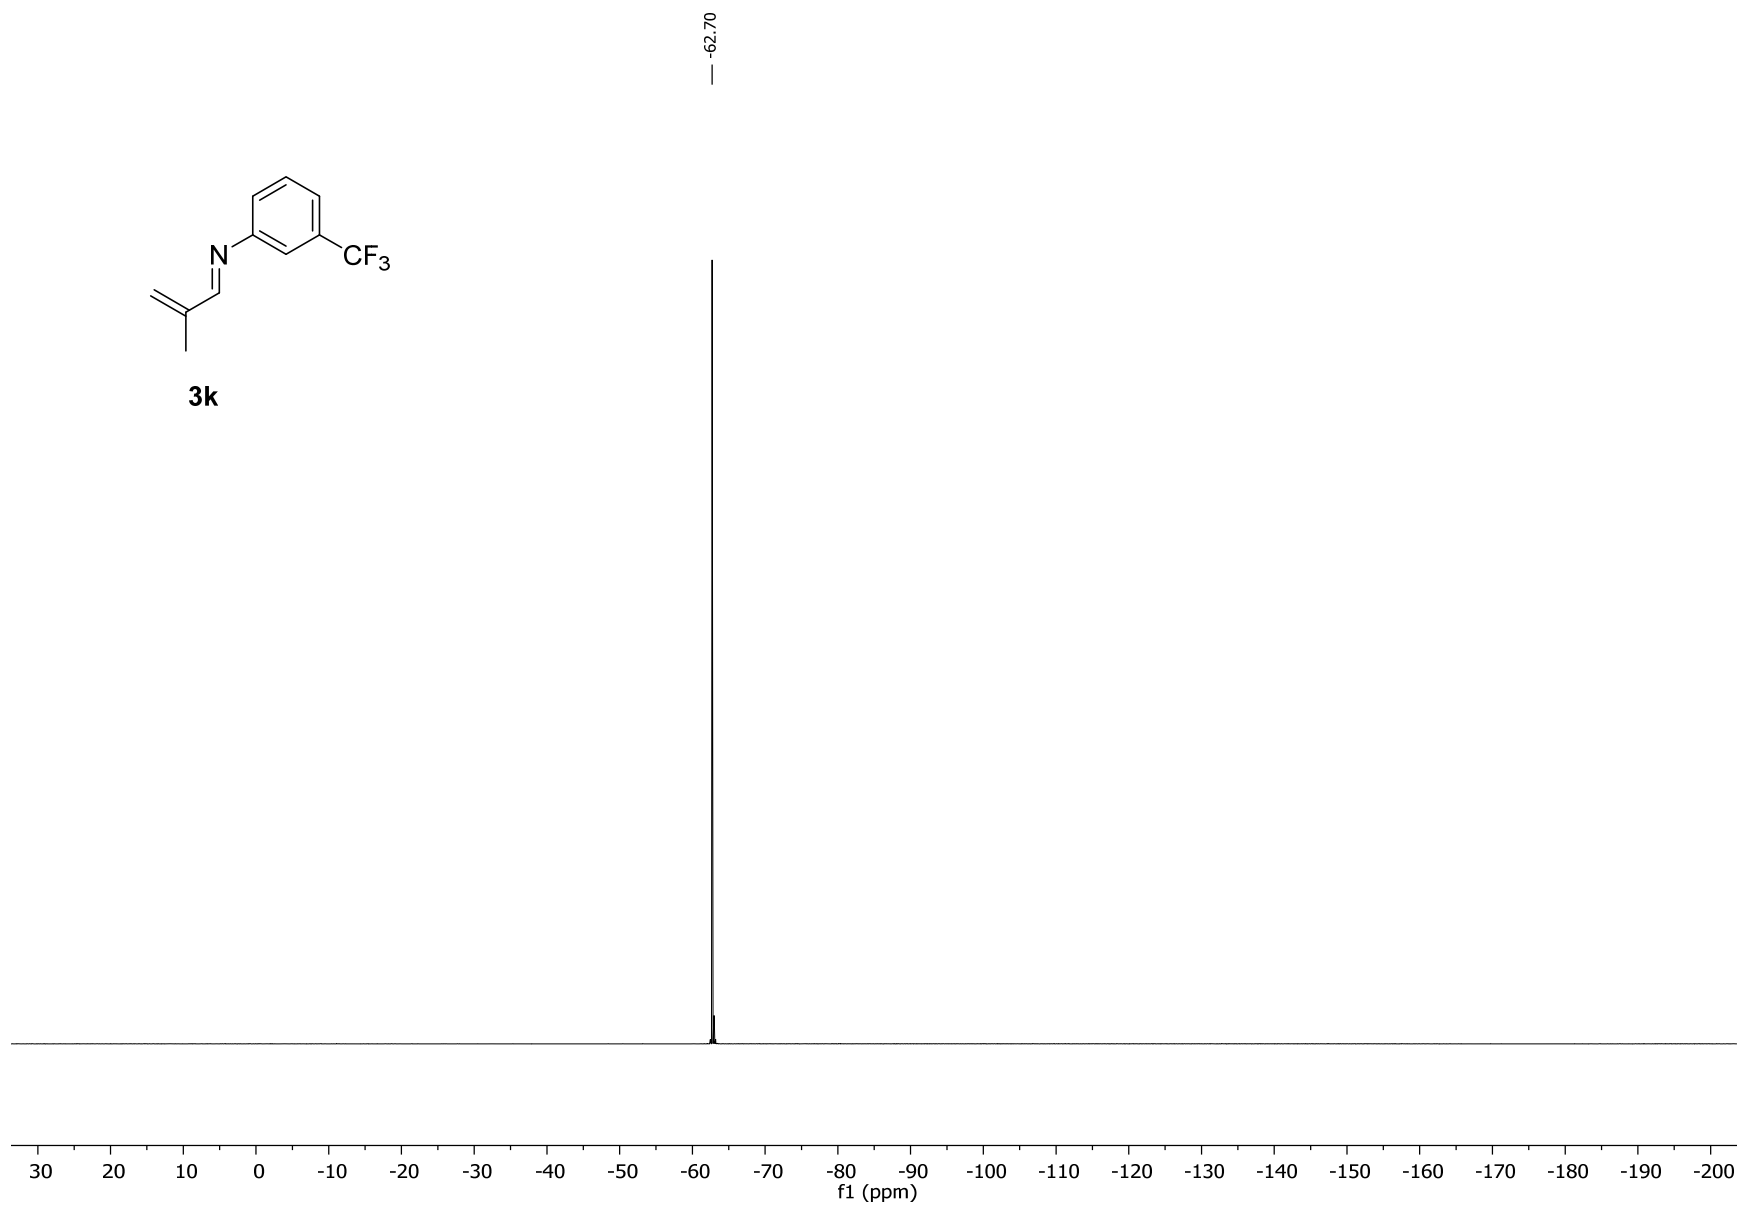



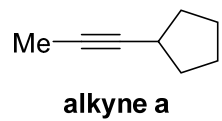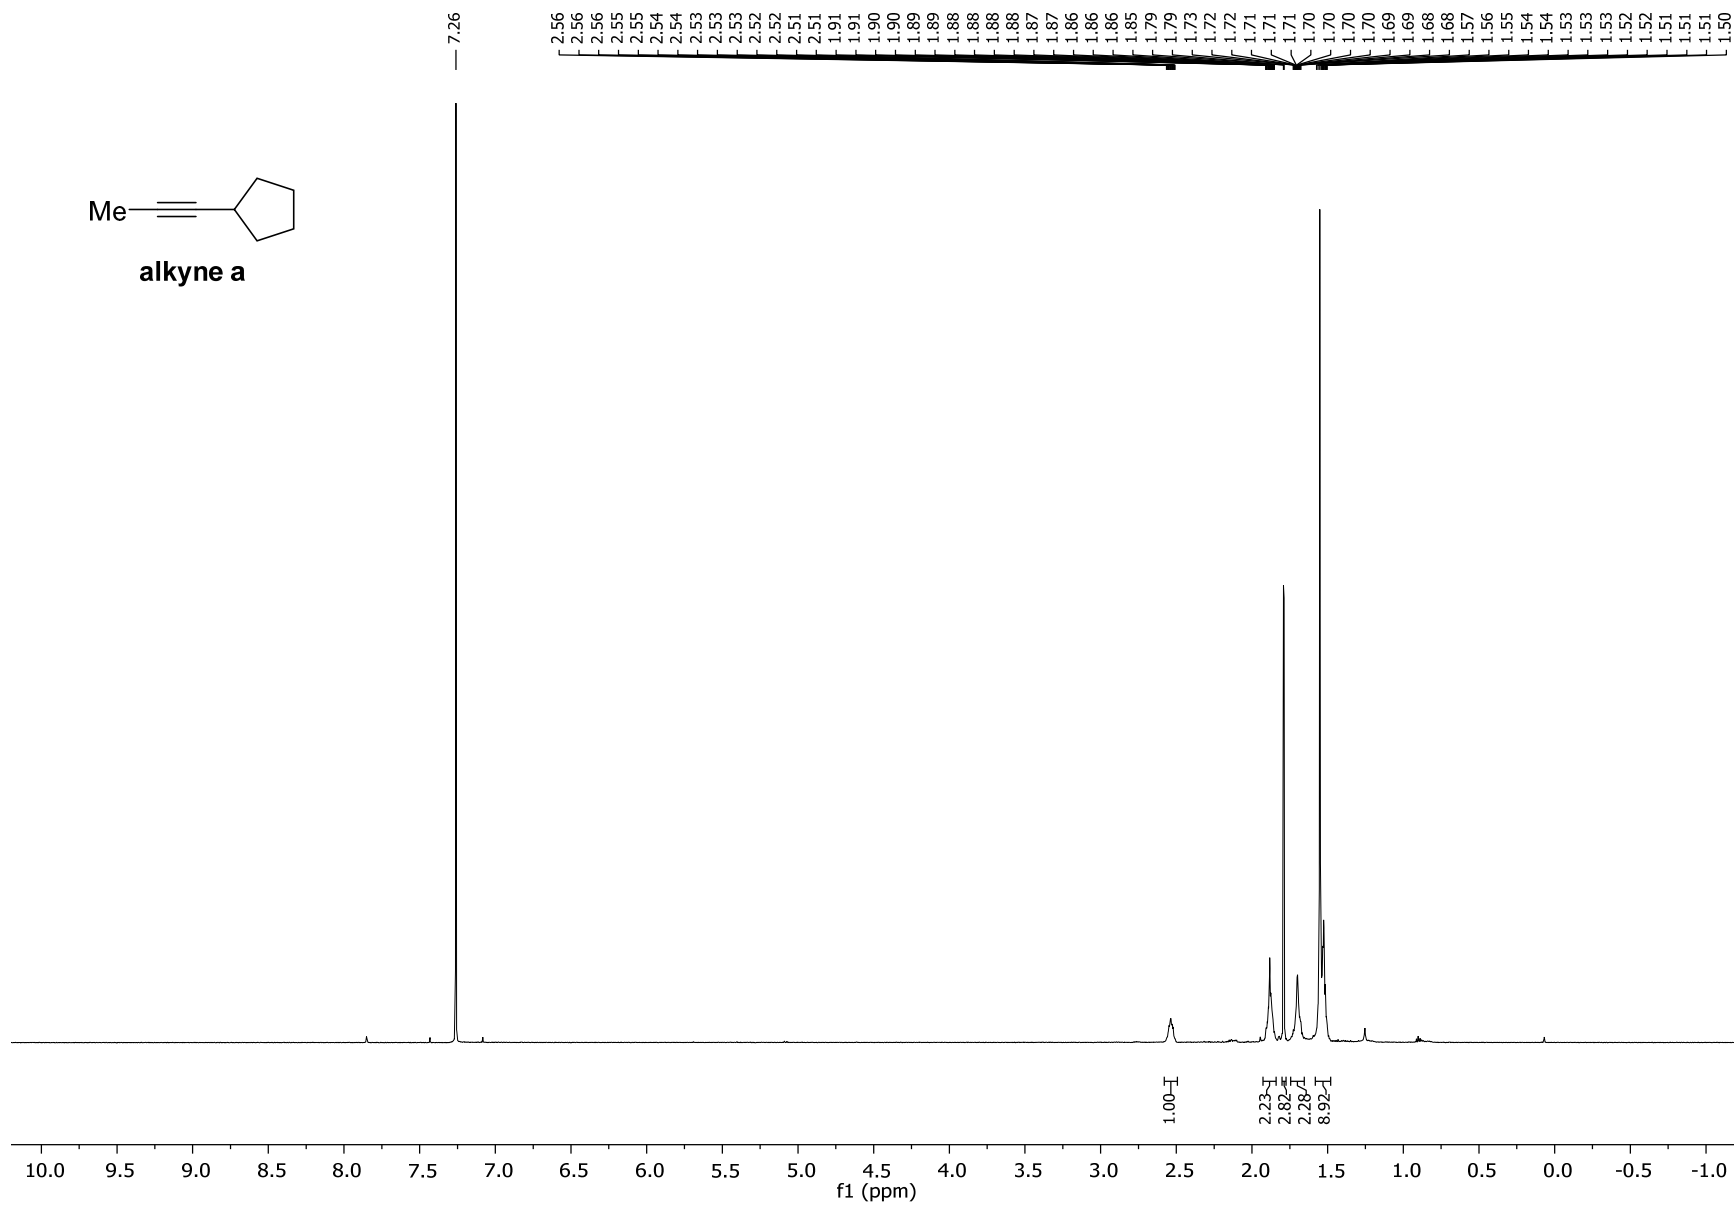

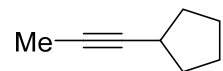

alkyne a

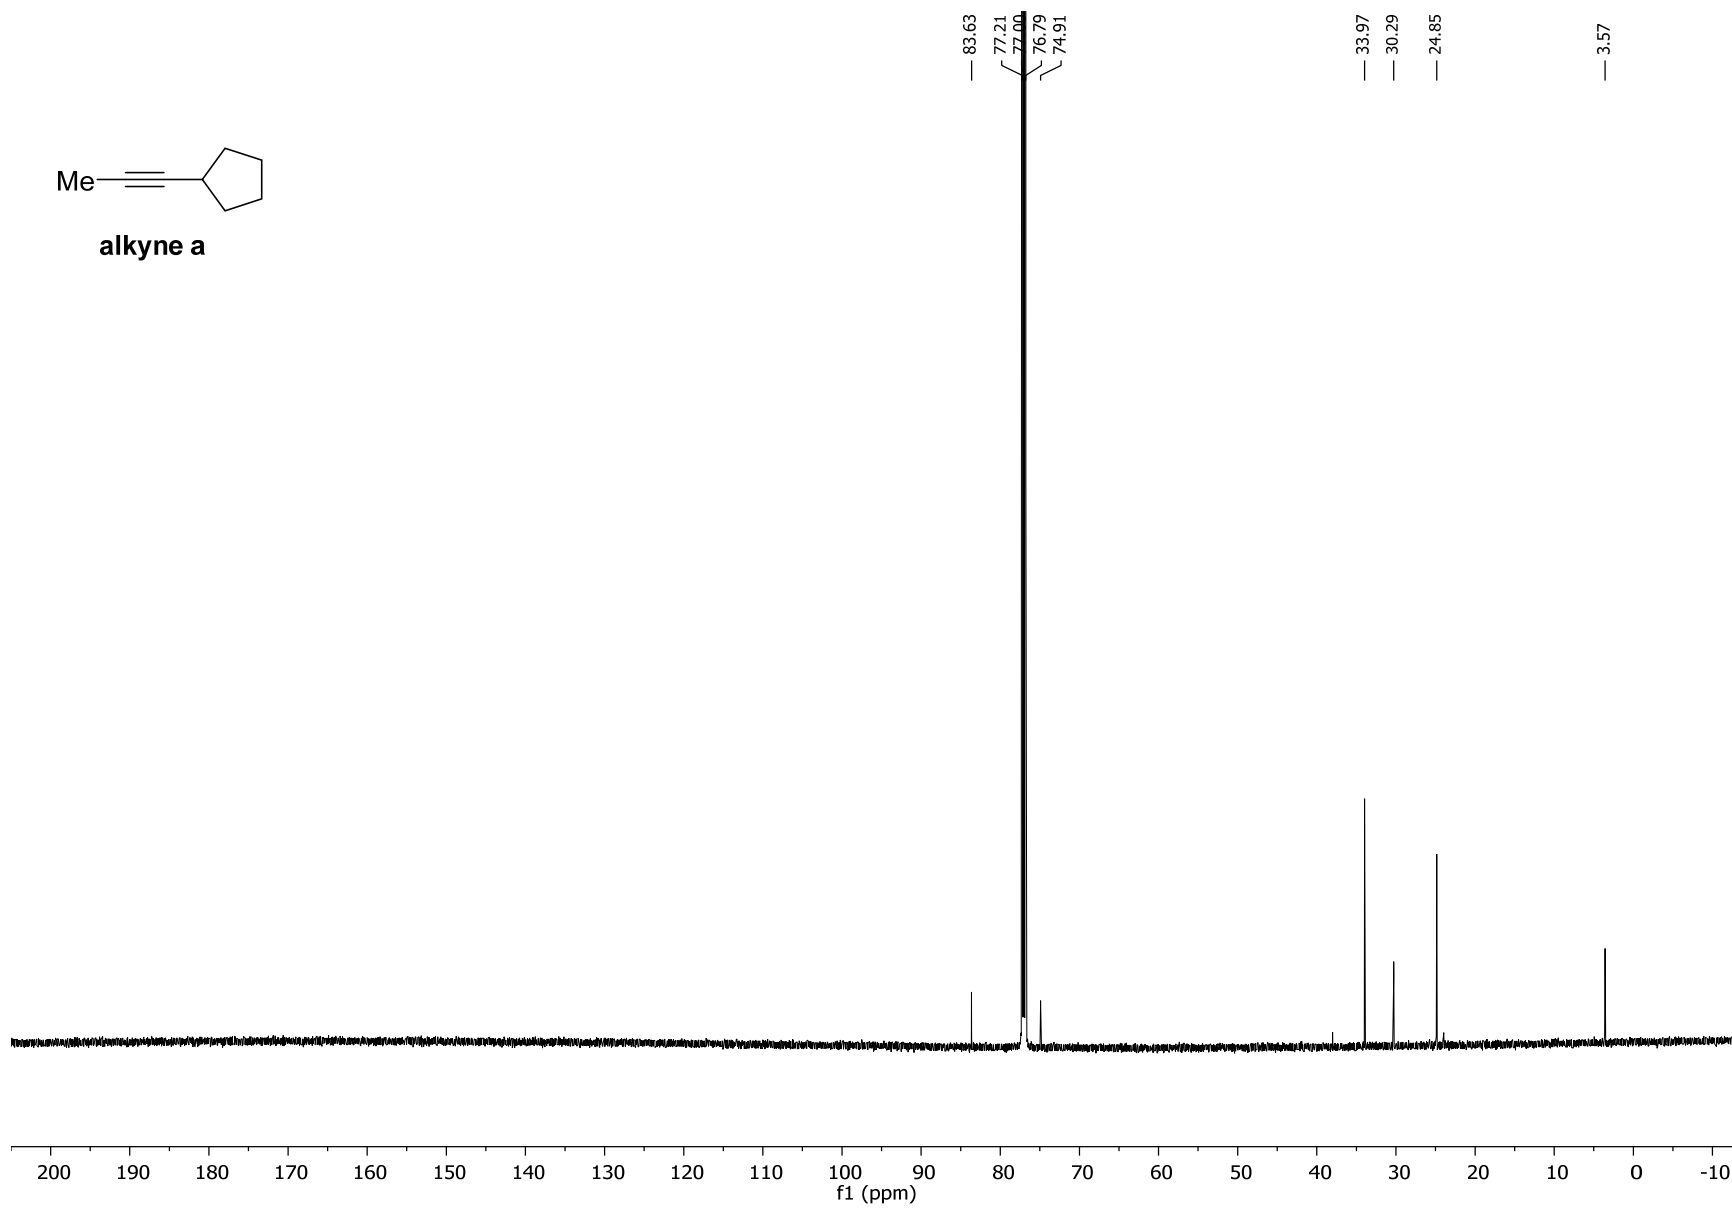

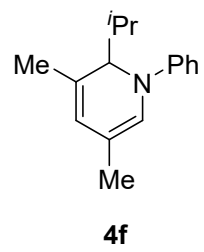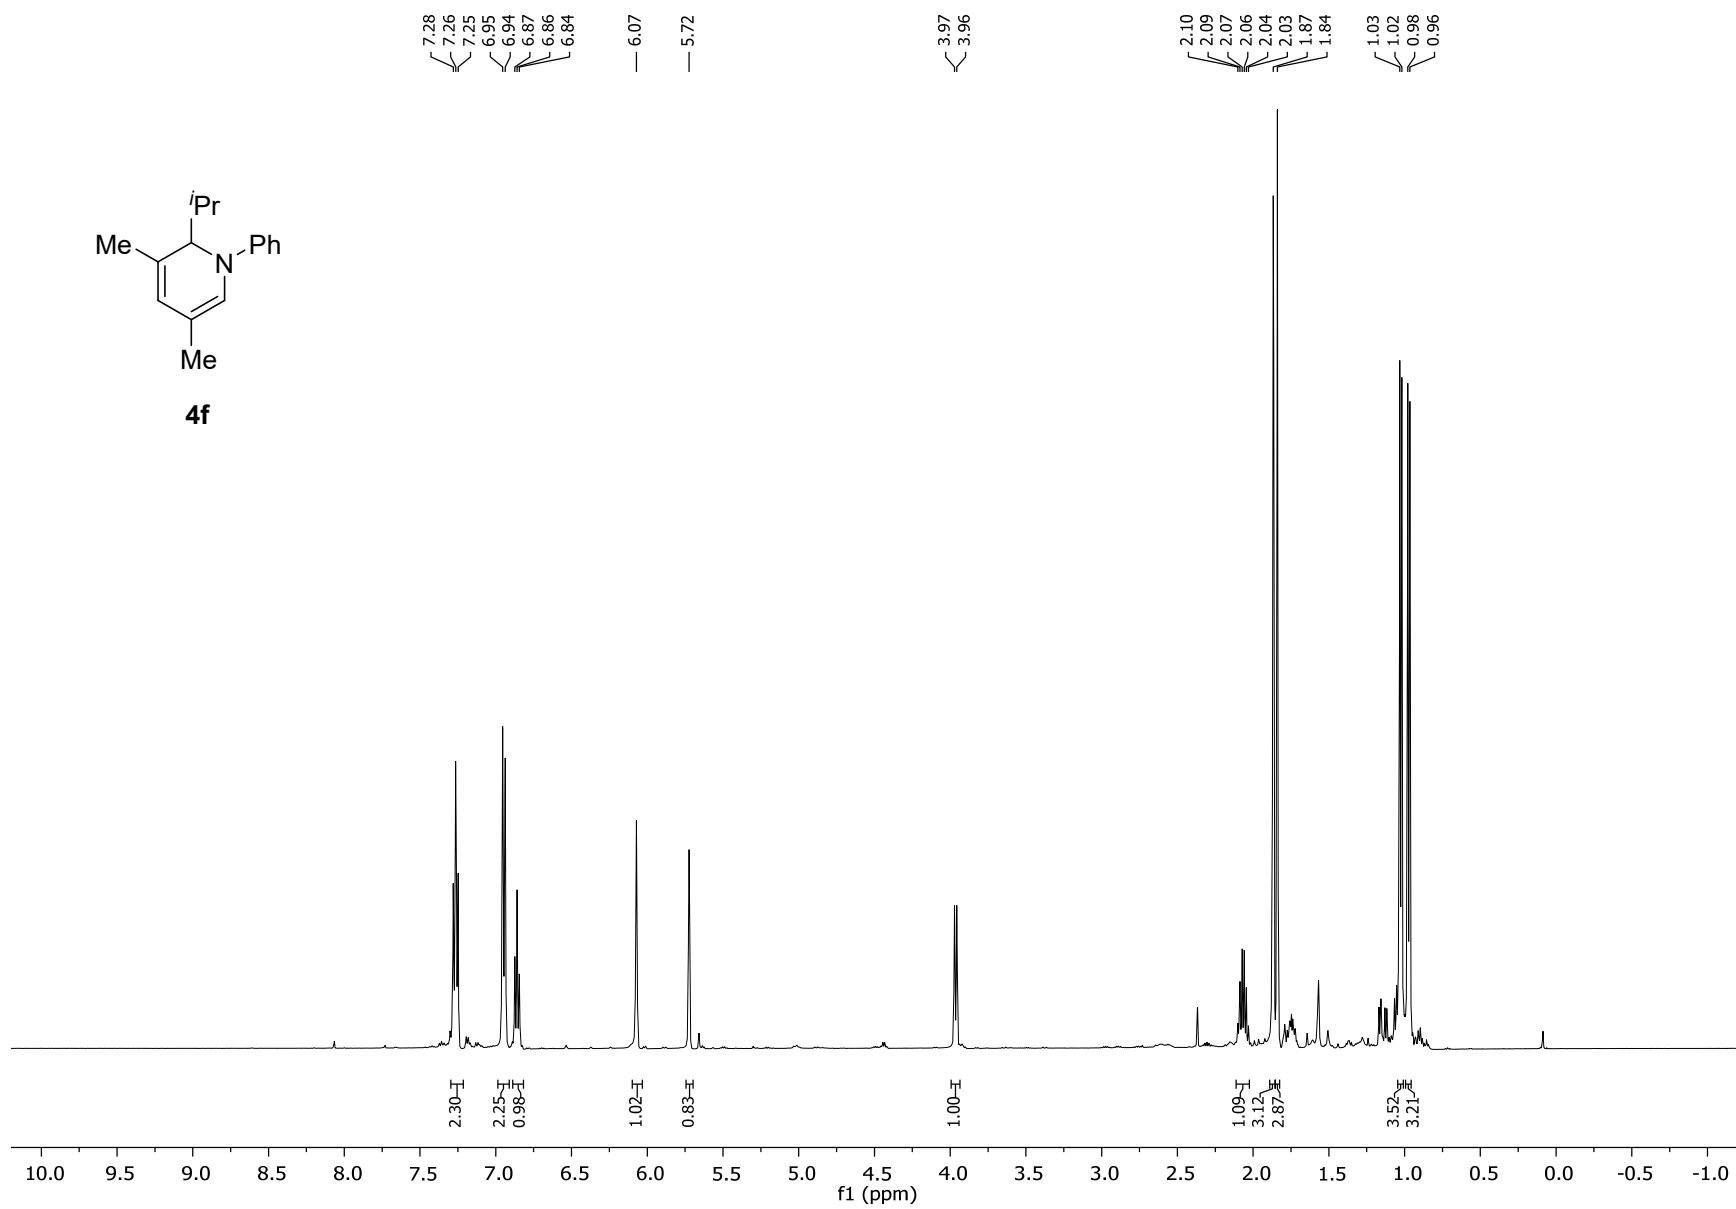

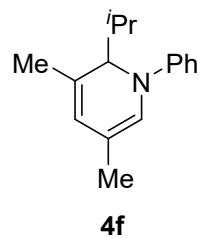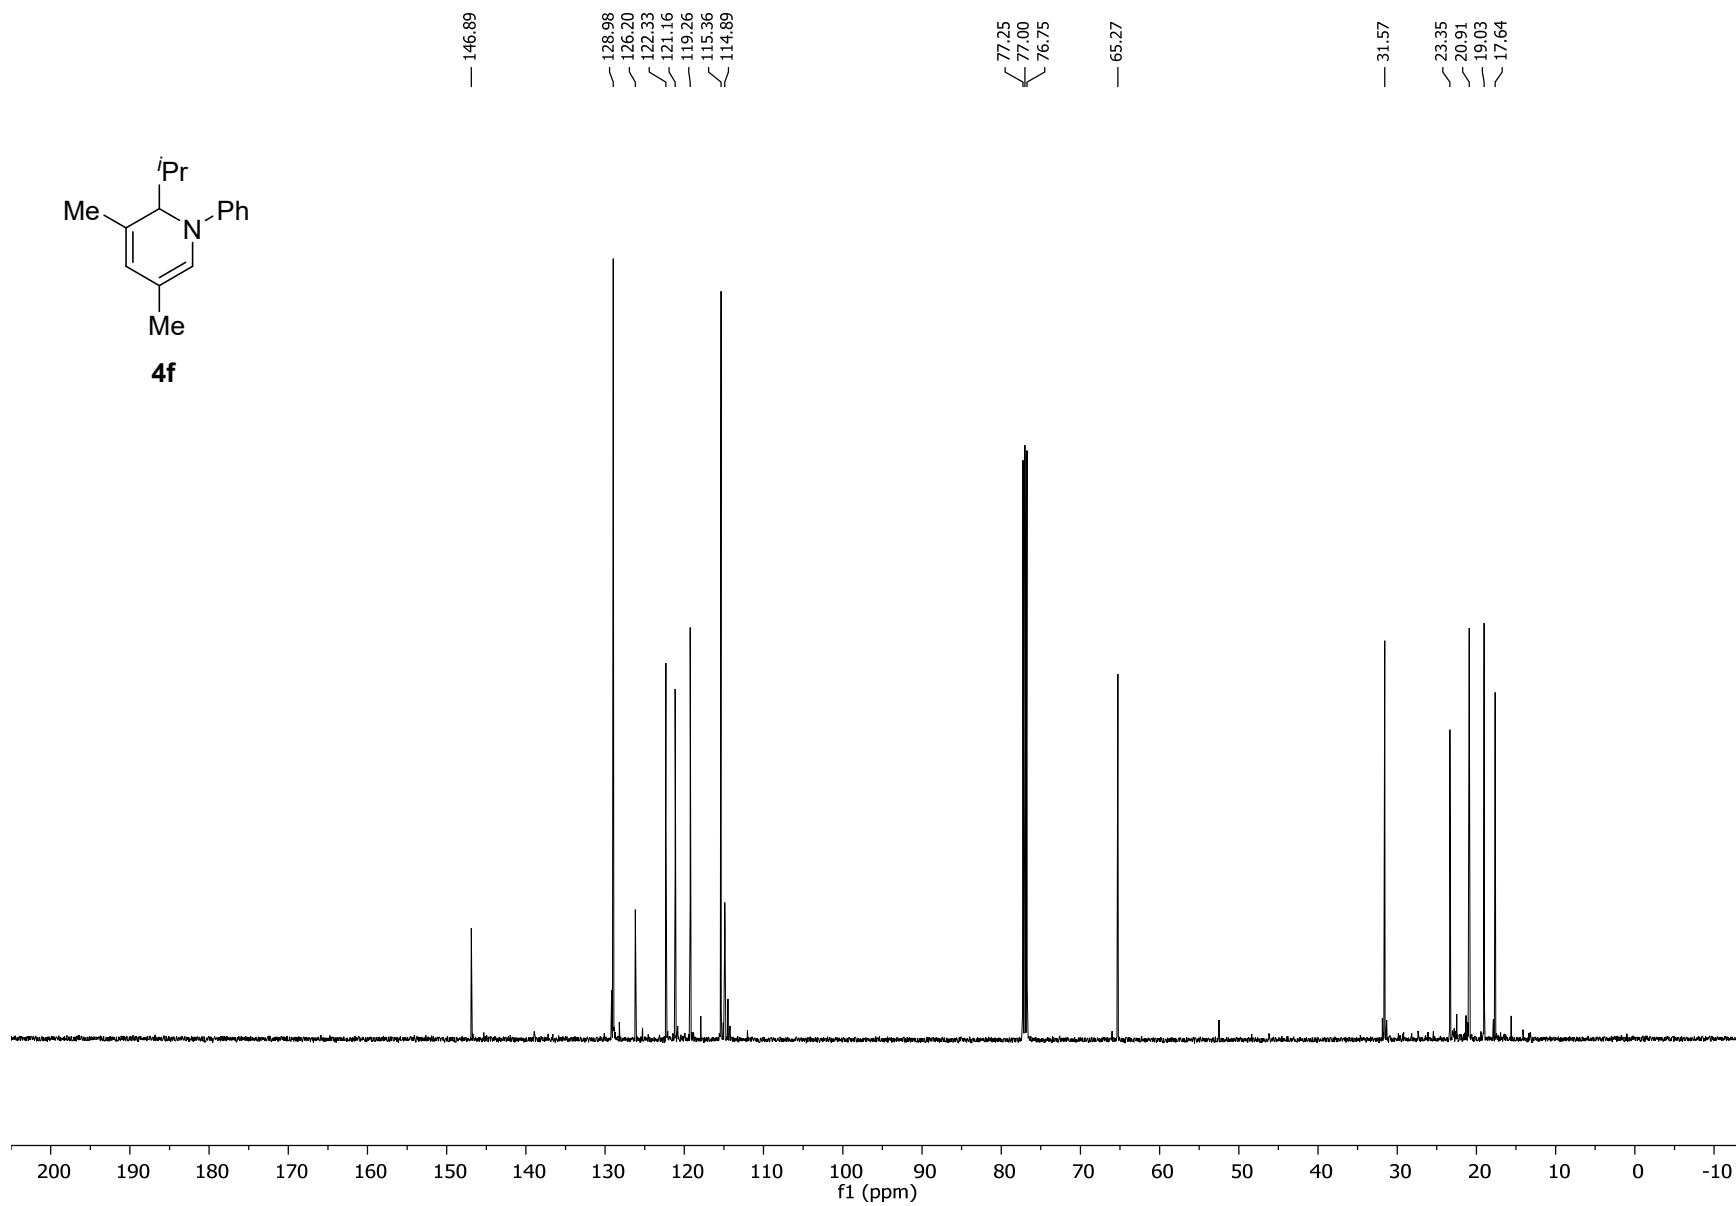

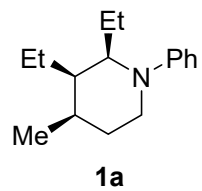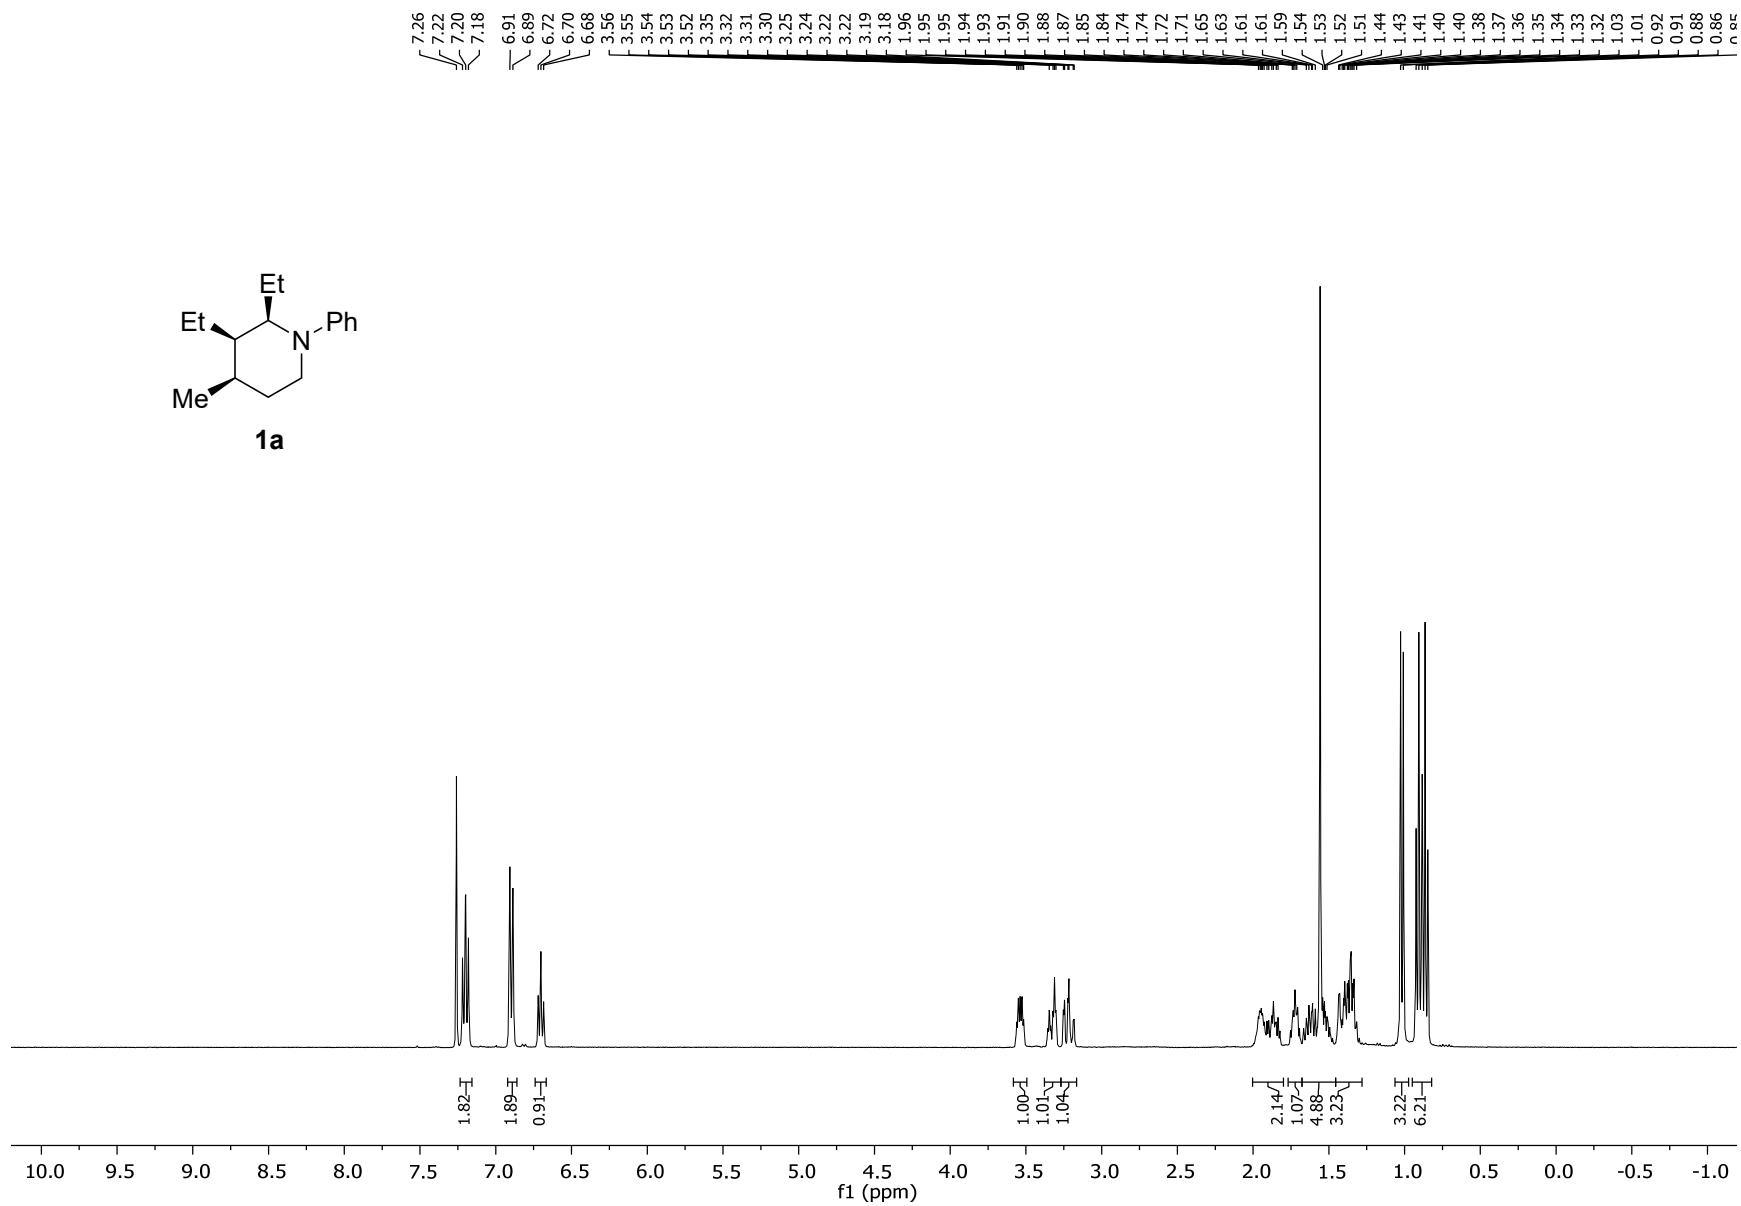

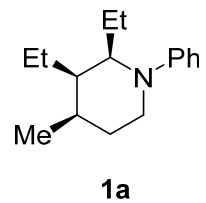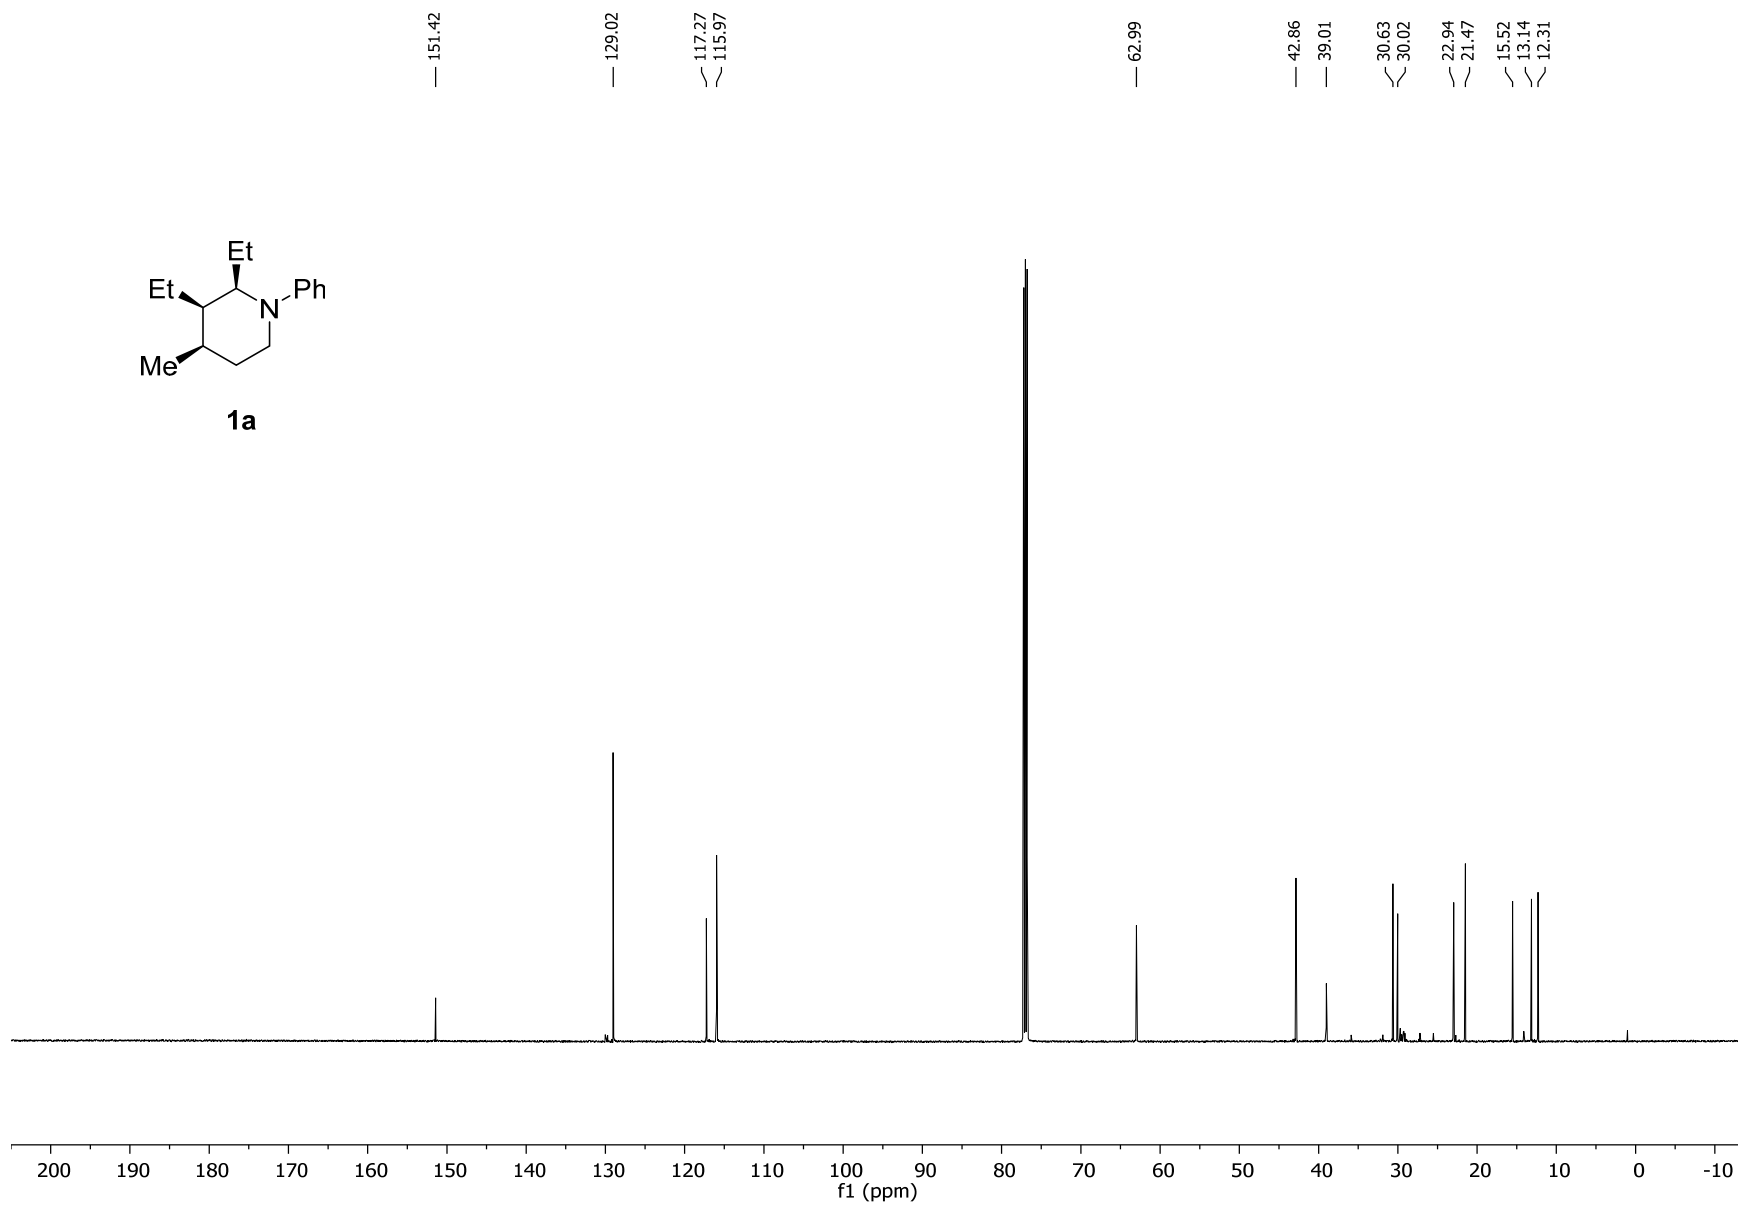

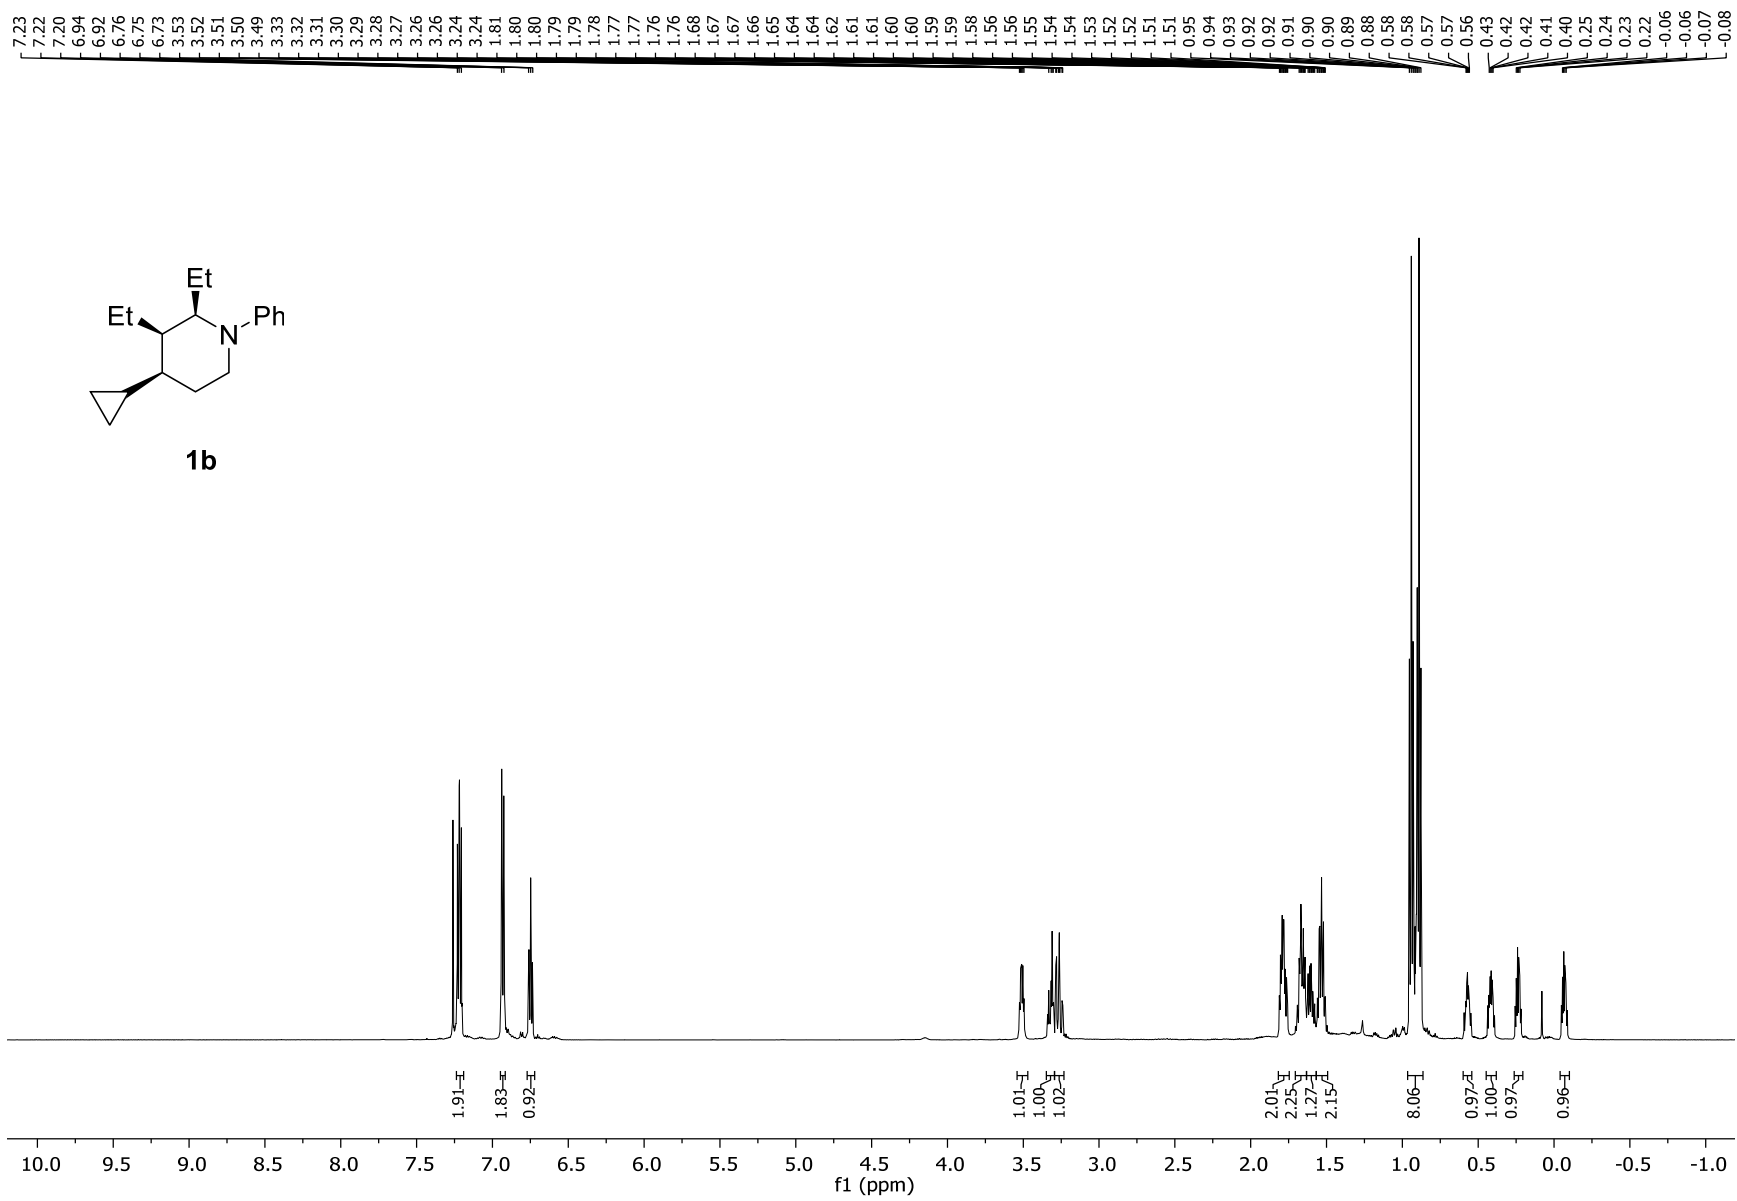

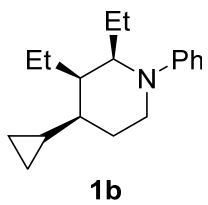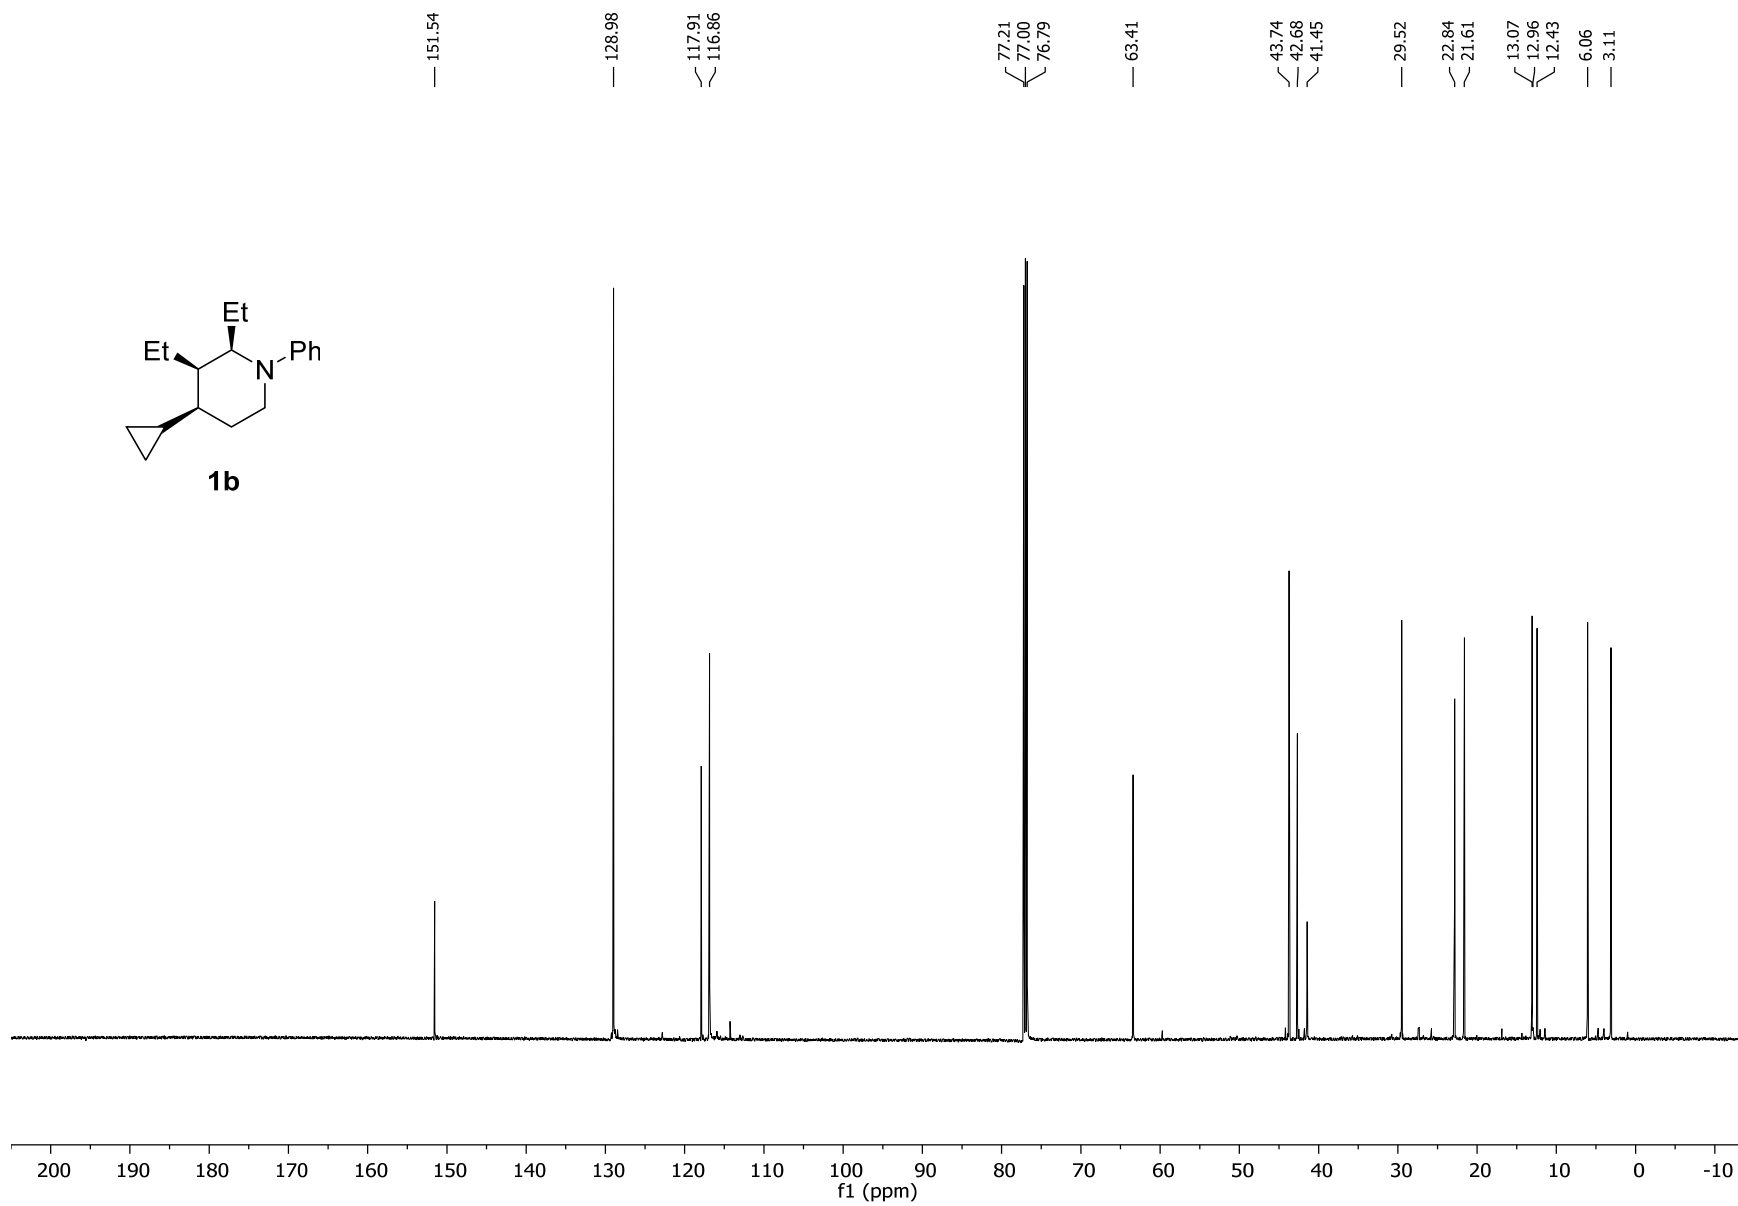



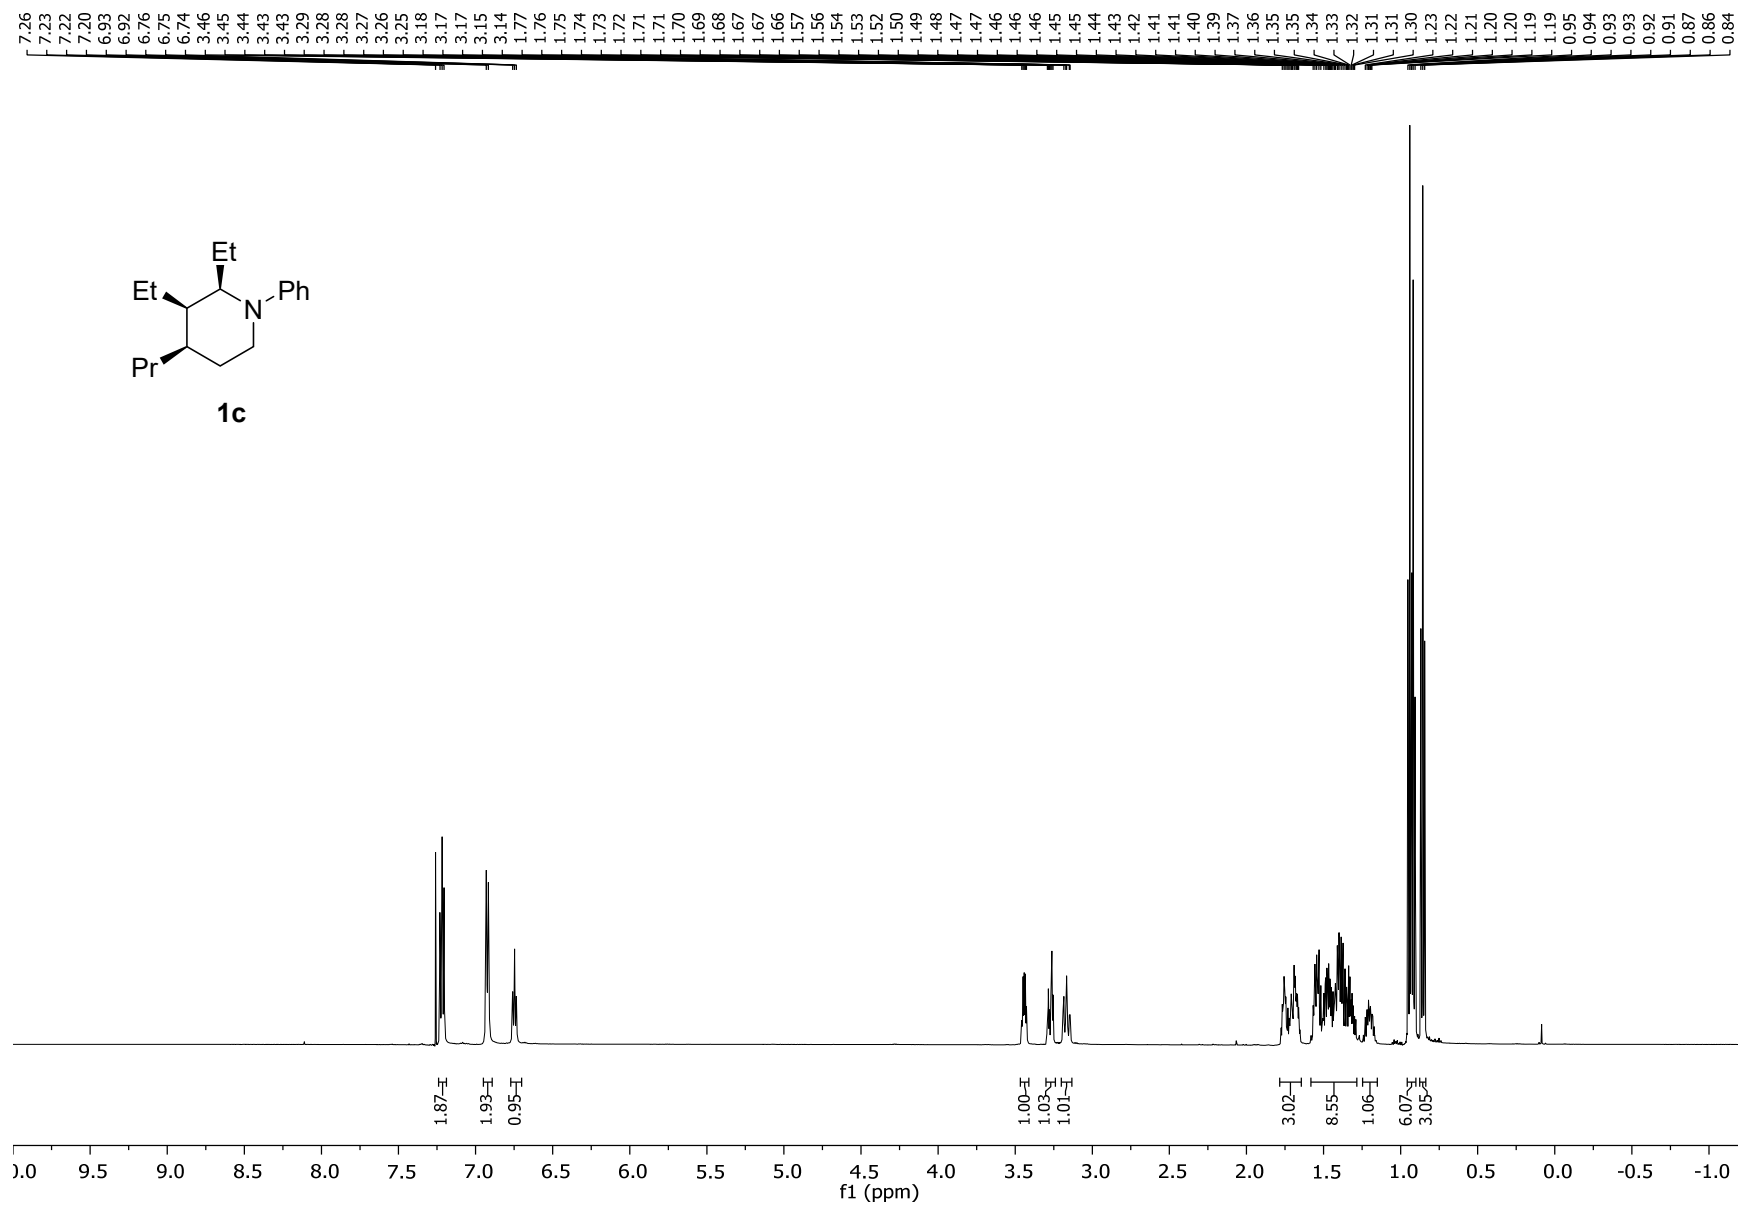

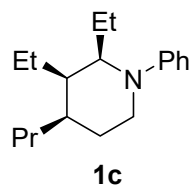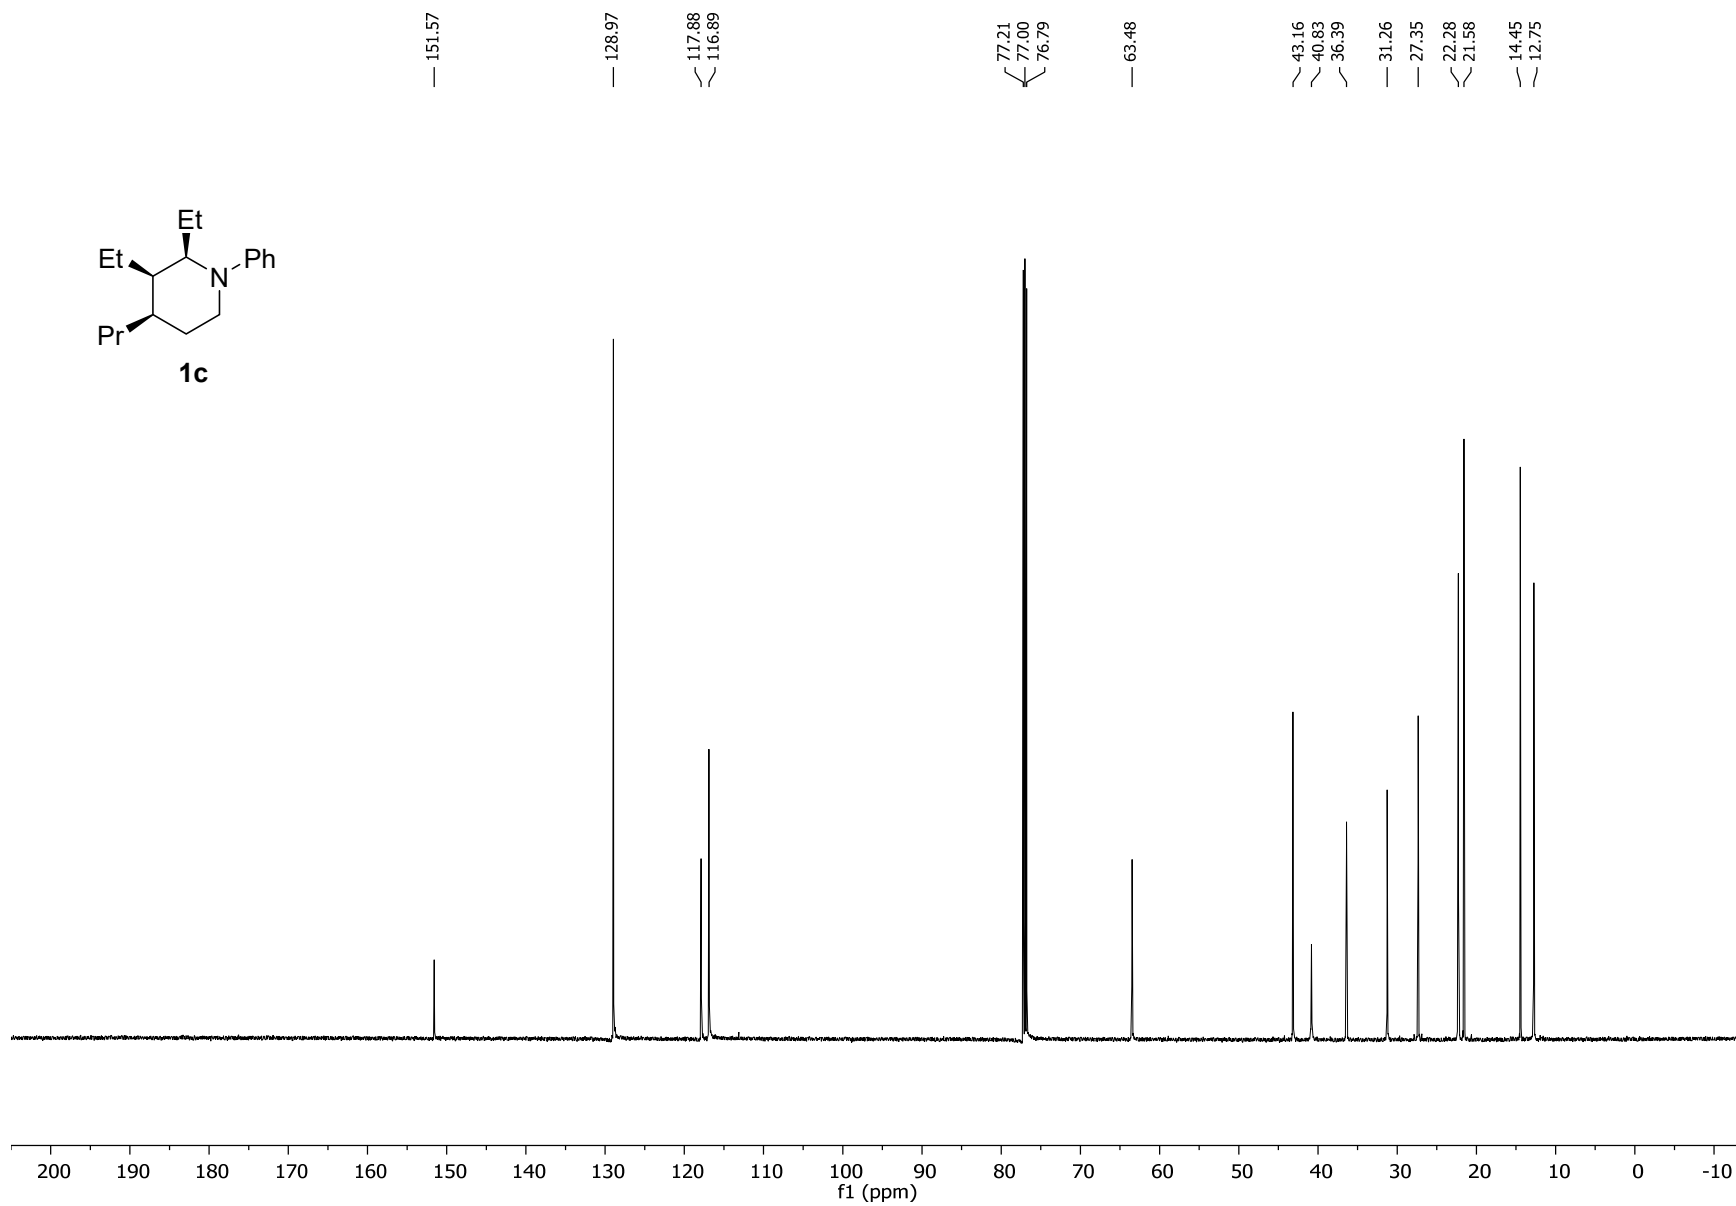

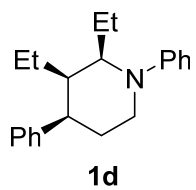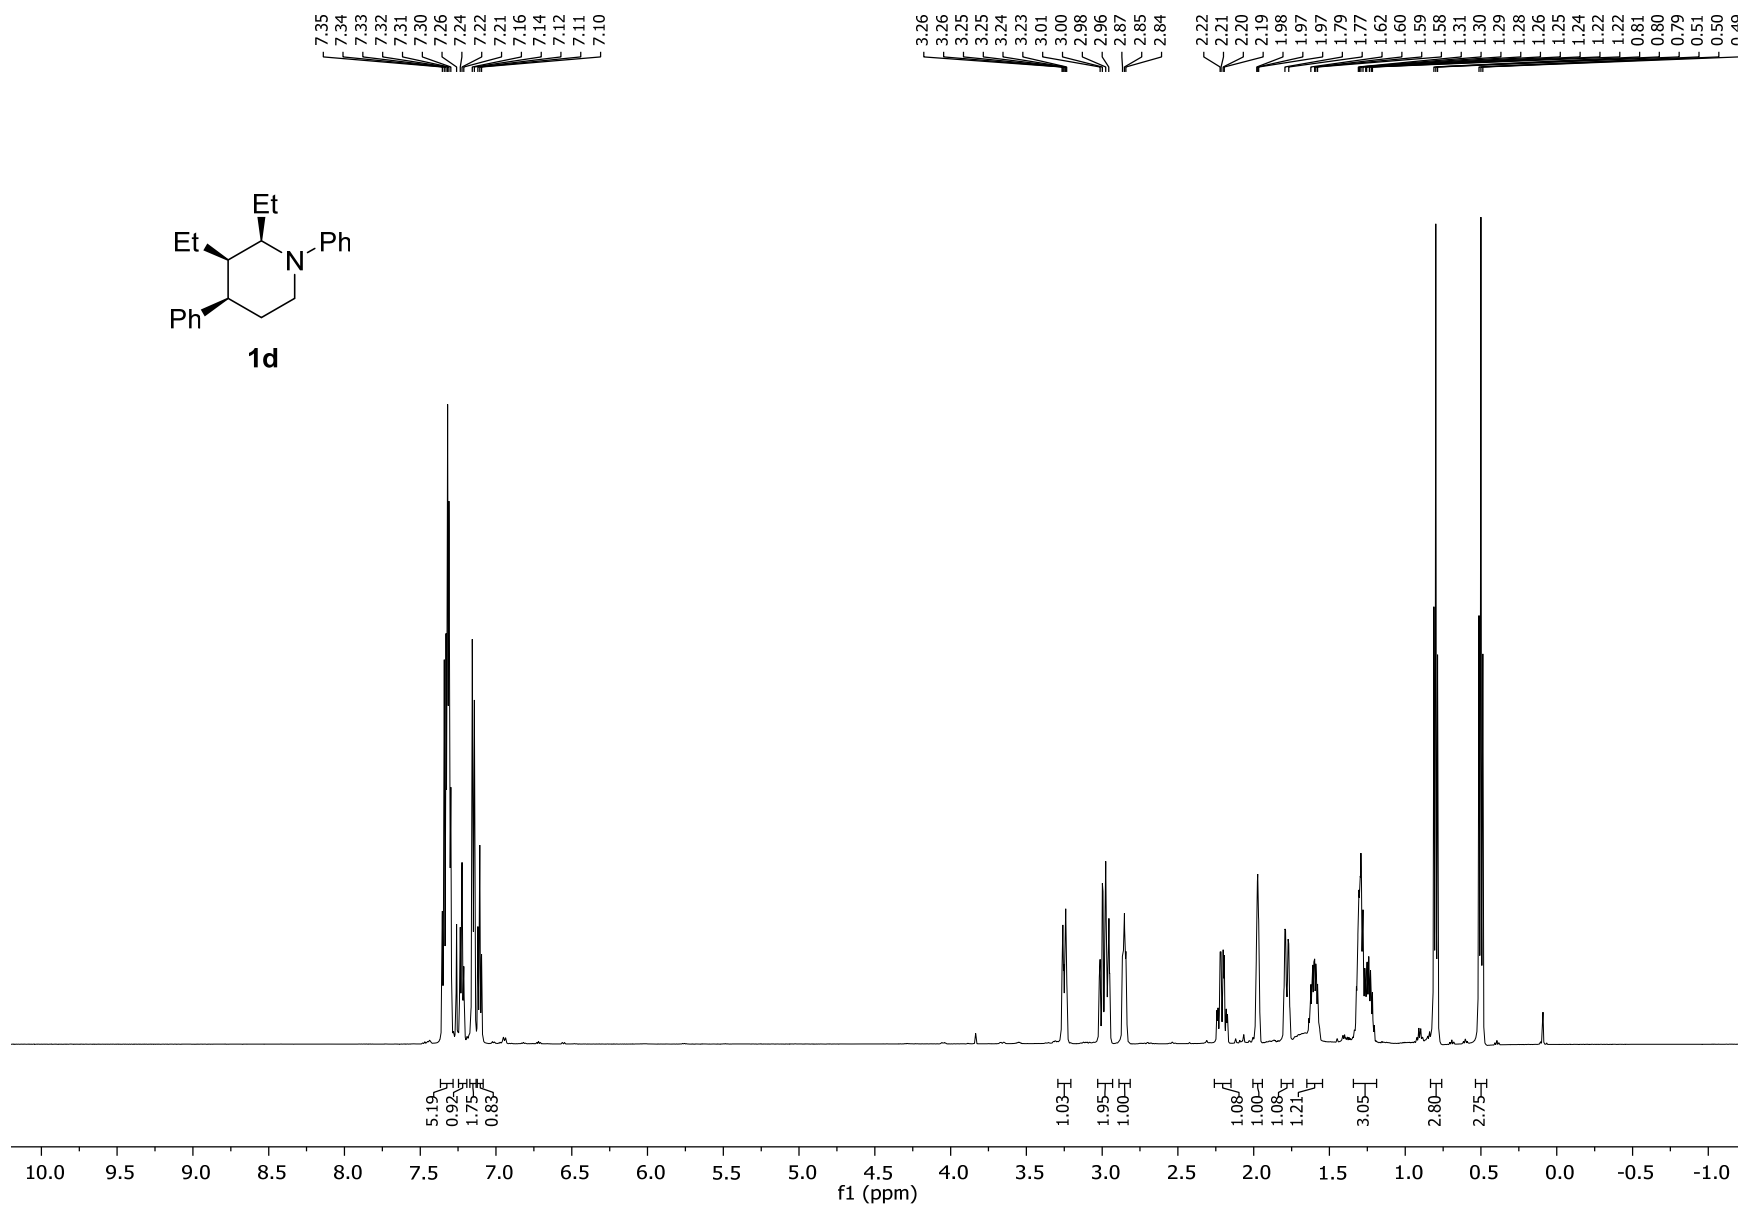

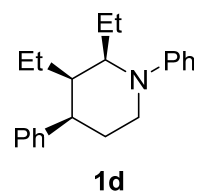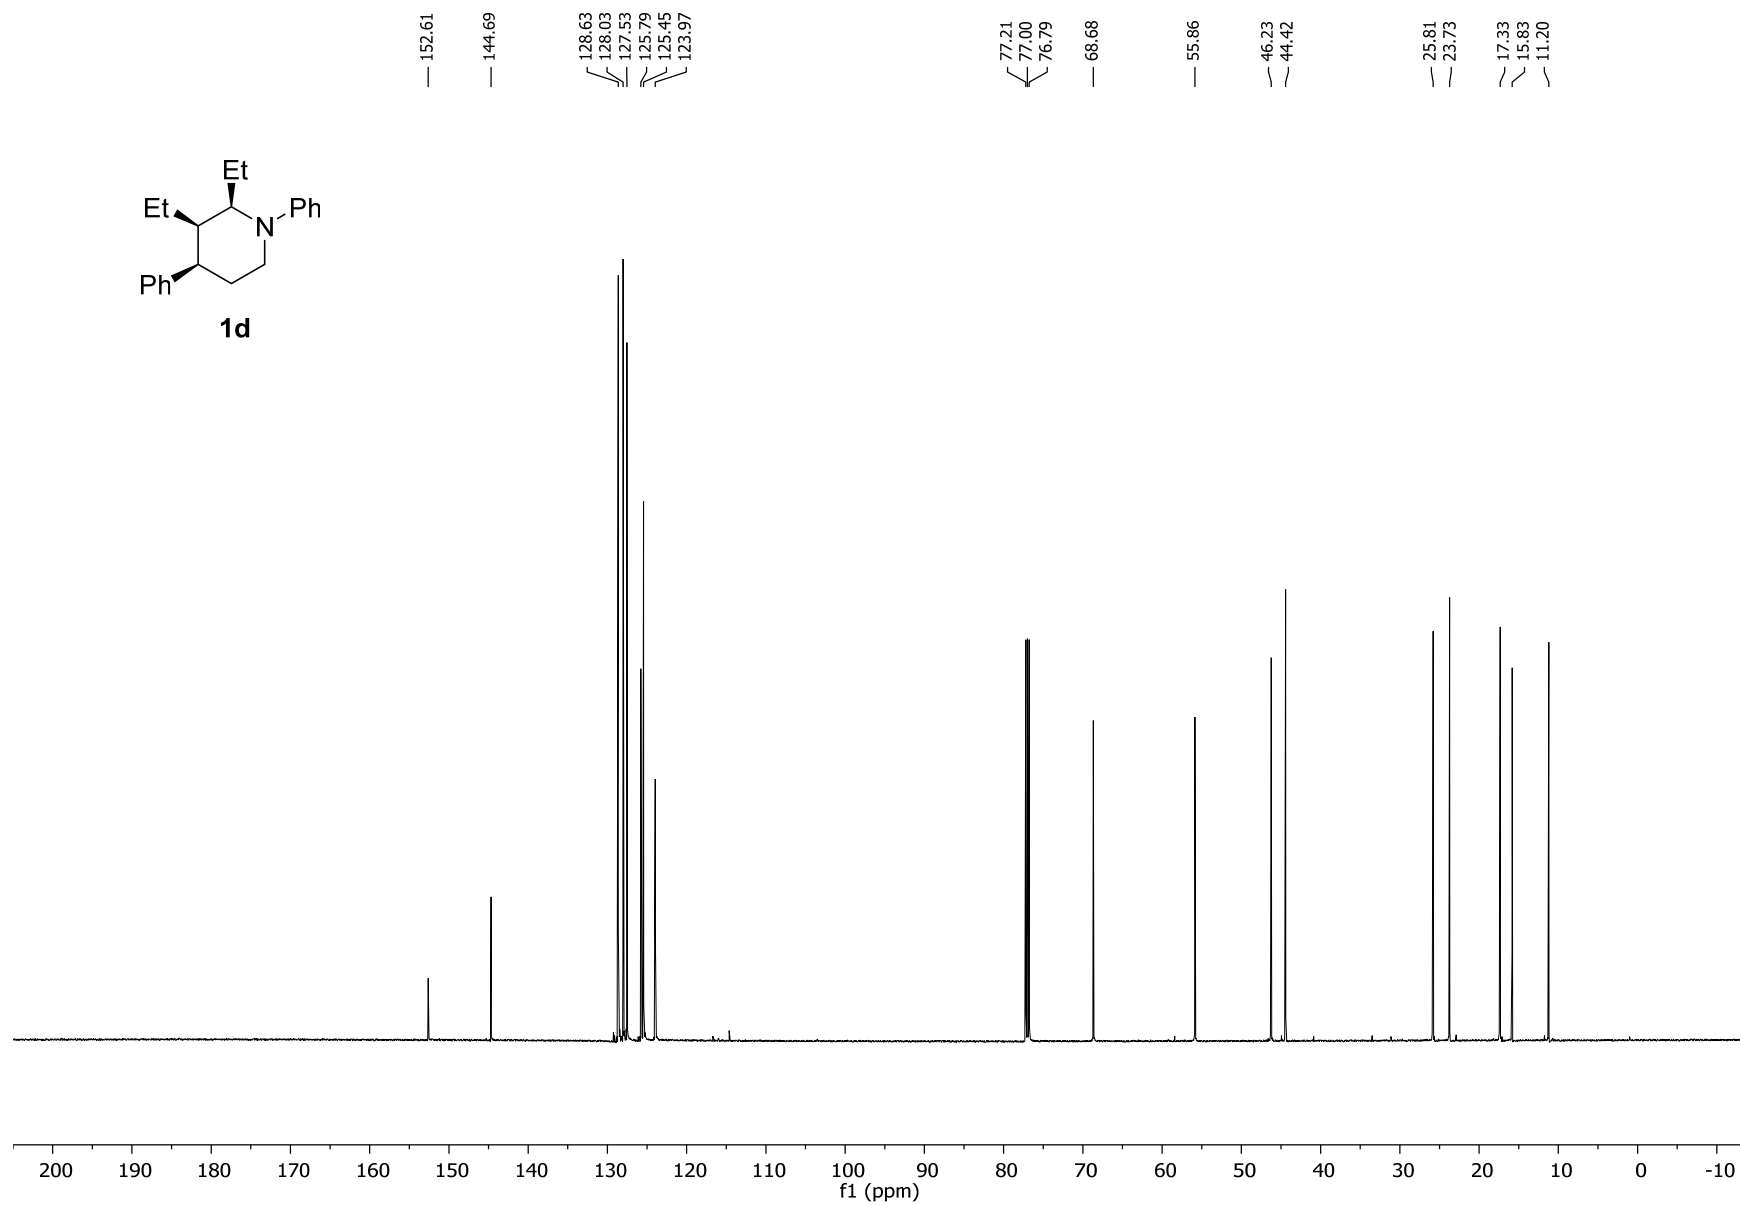

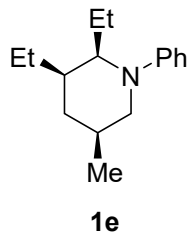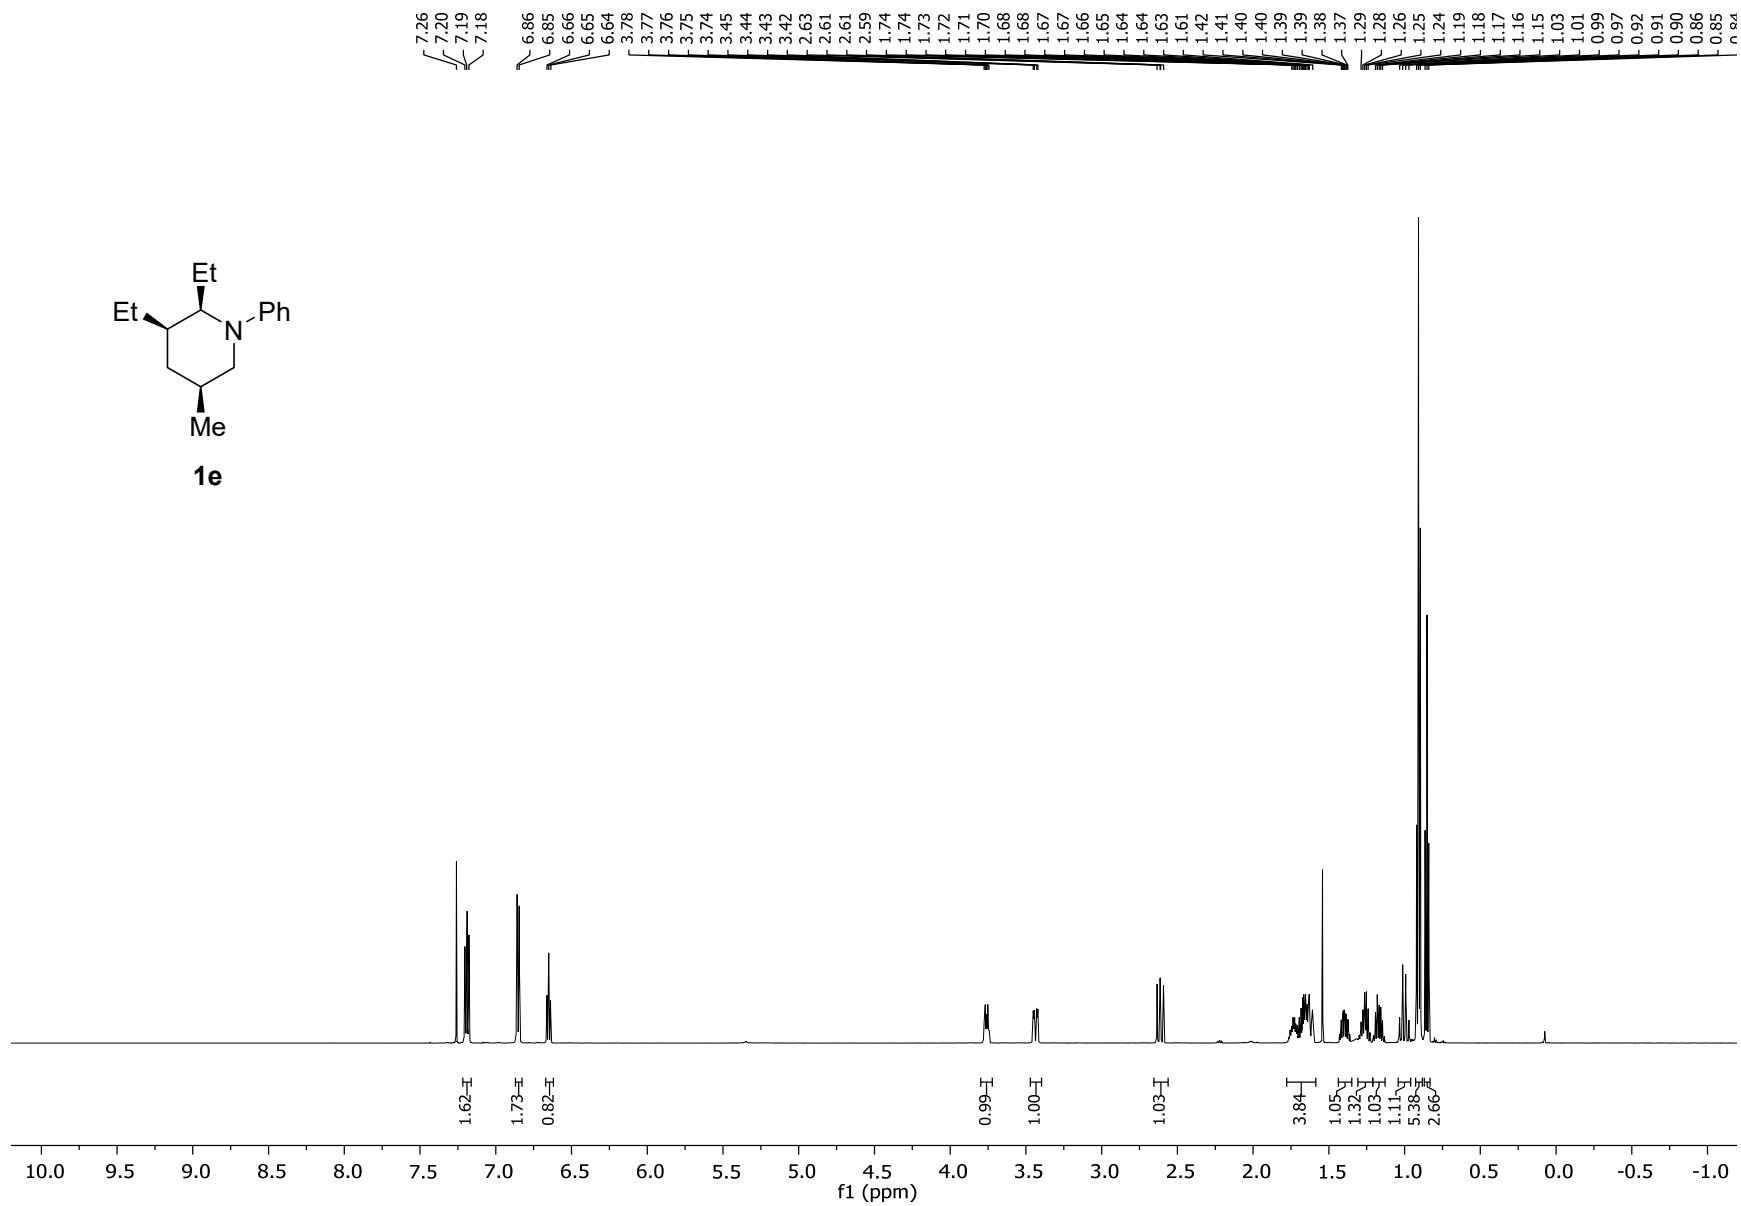

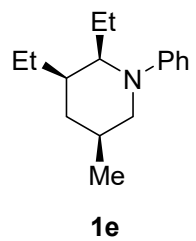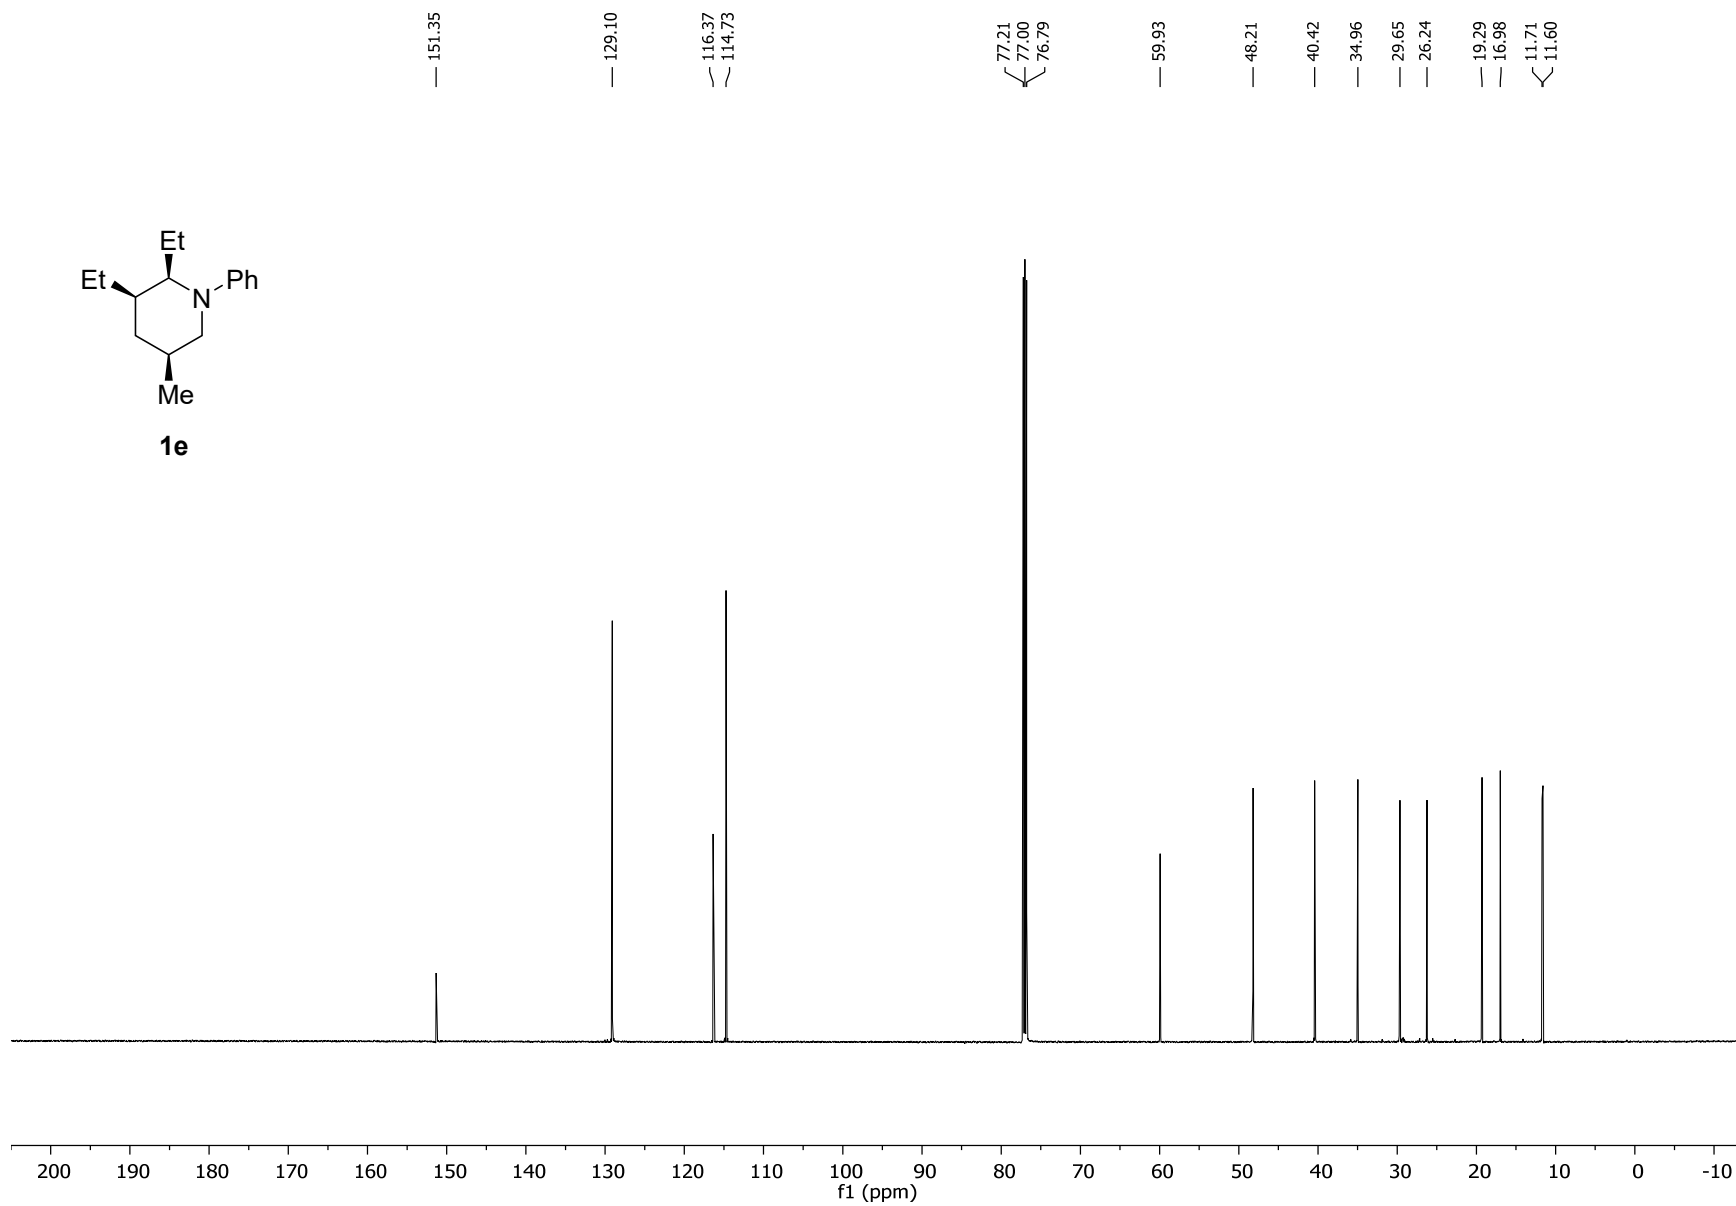

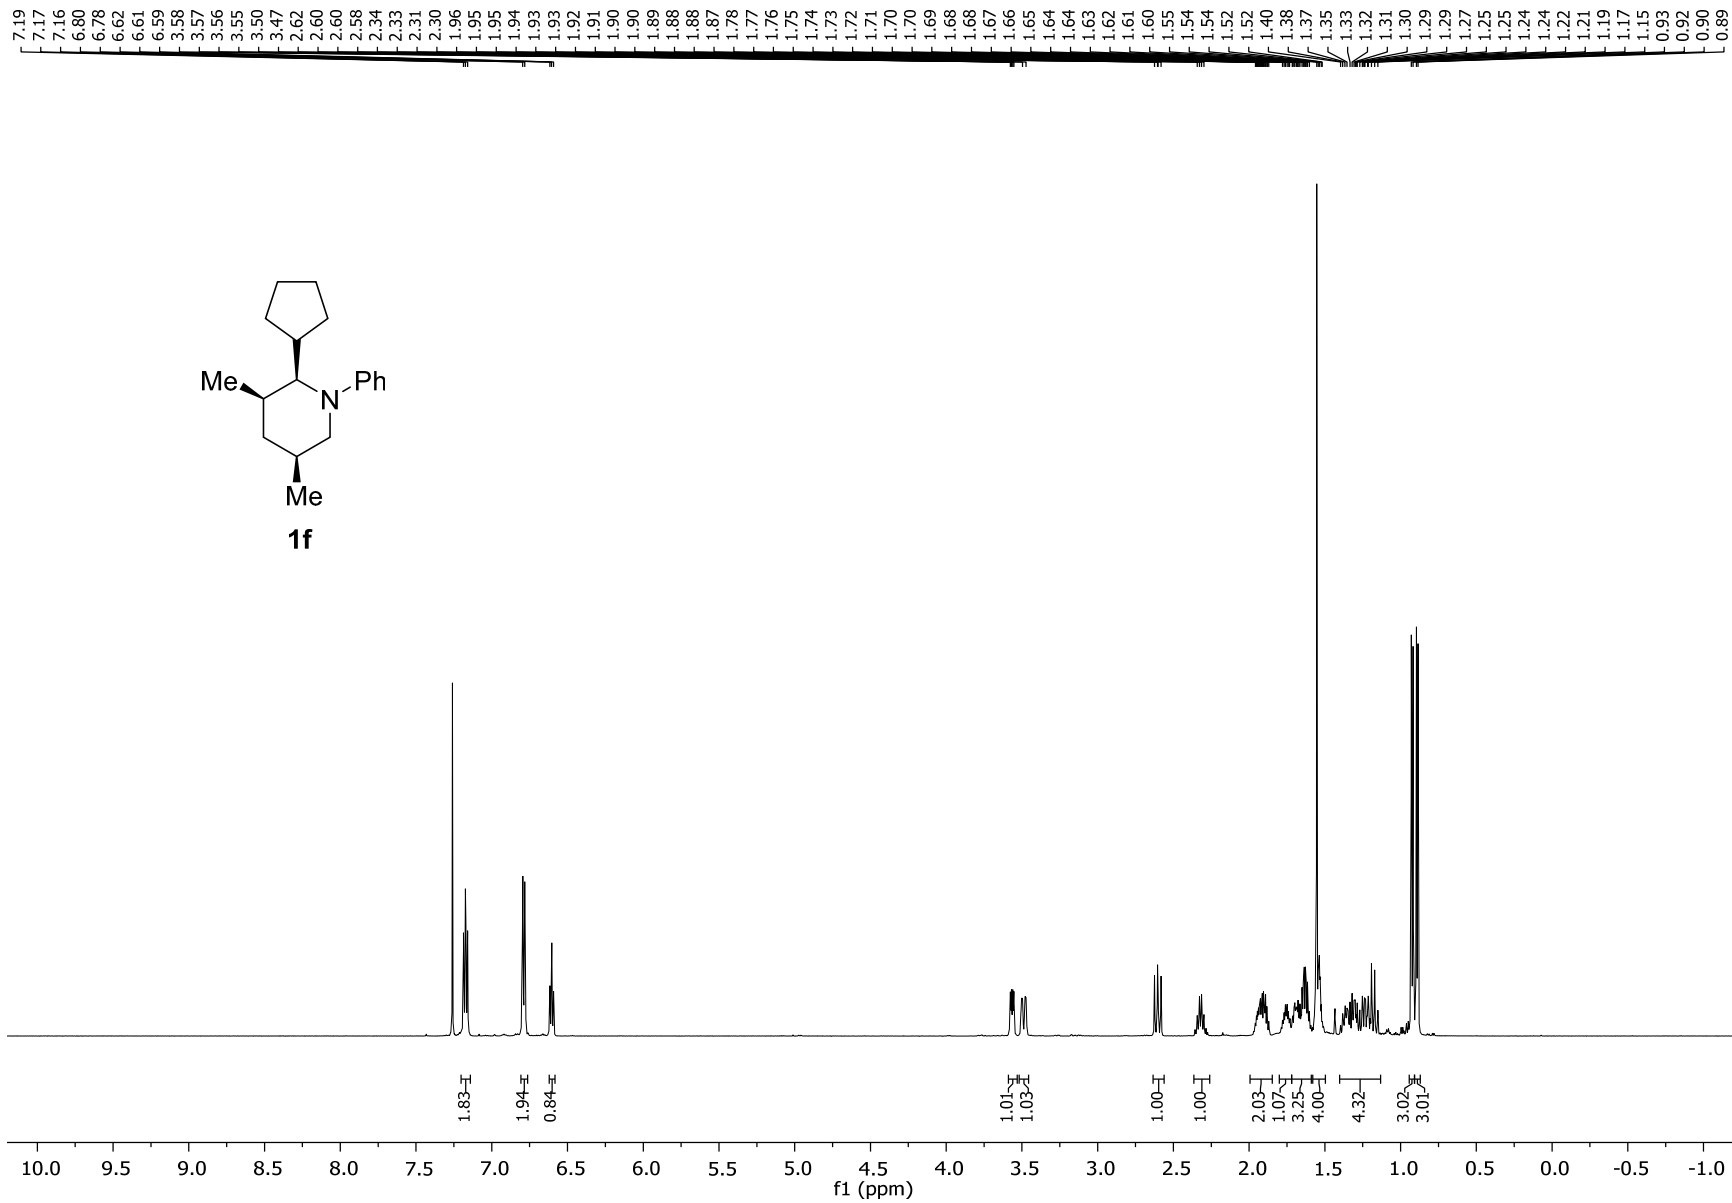

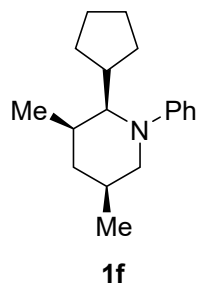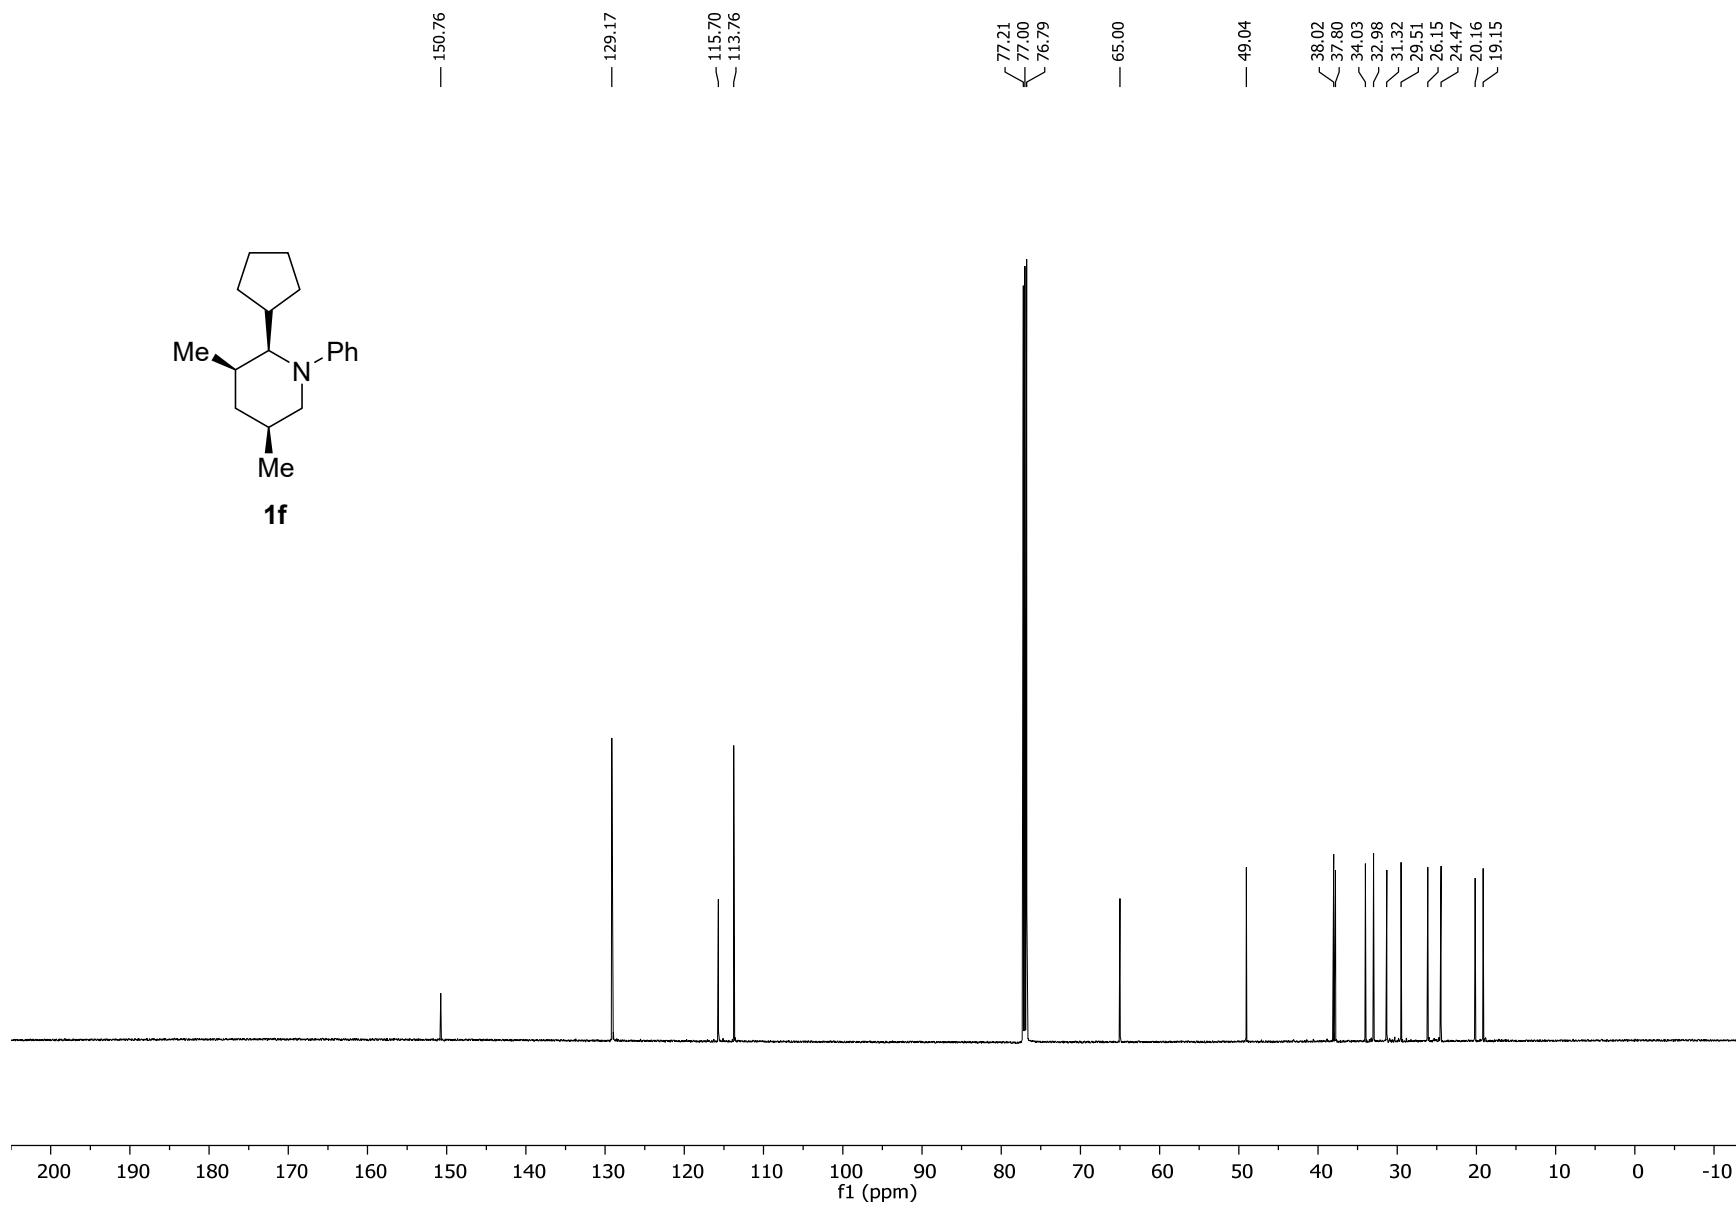



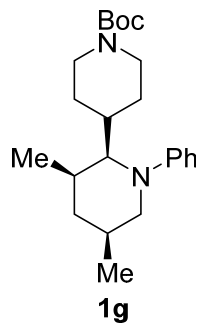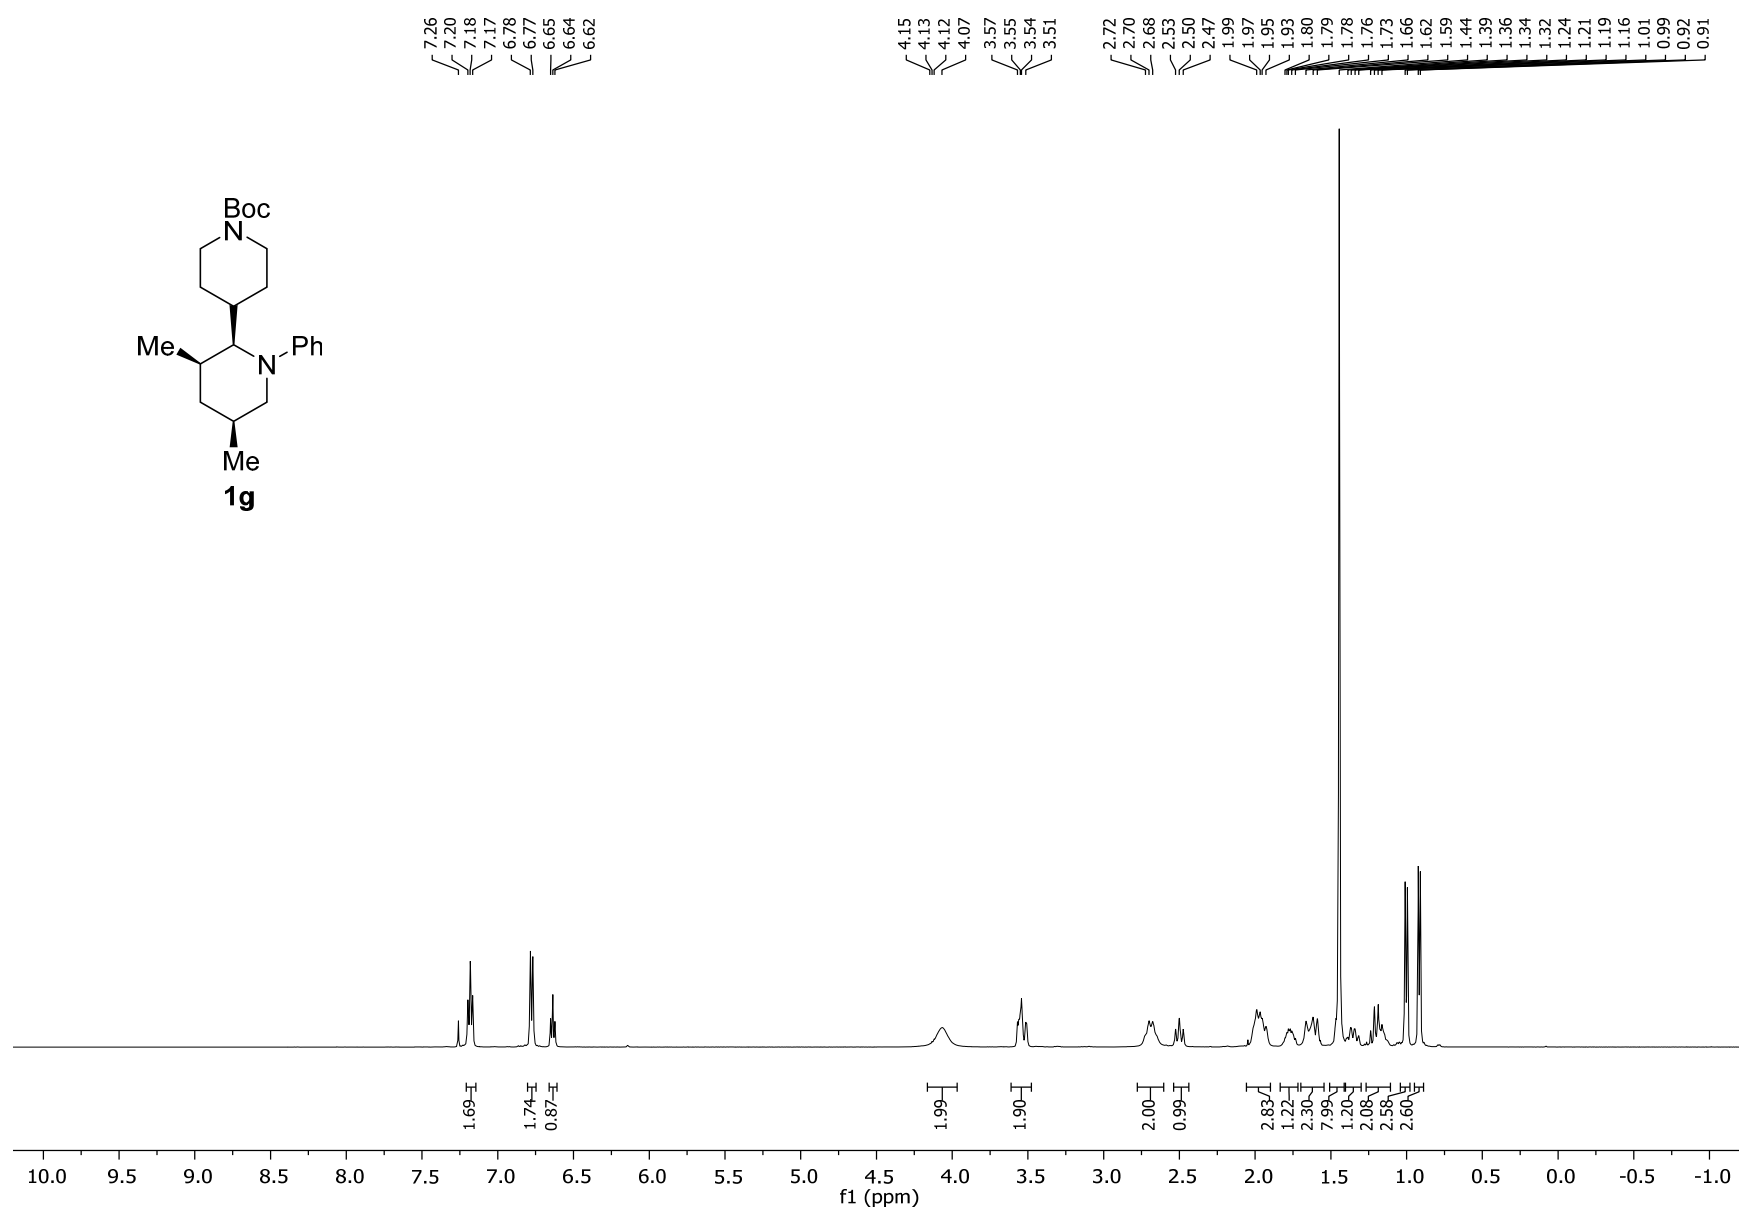

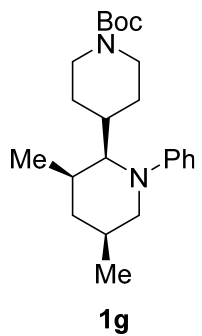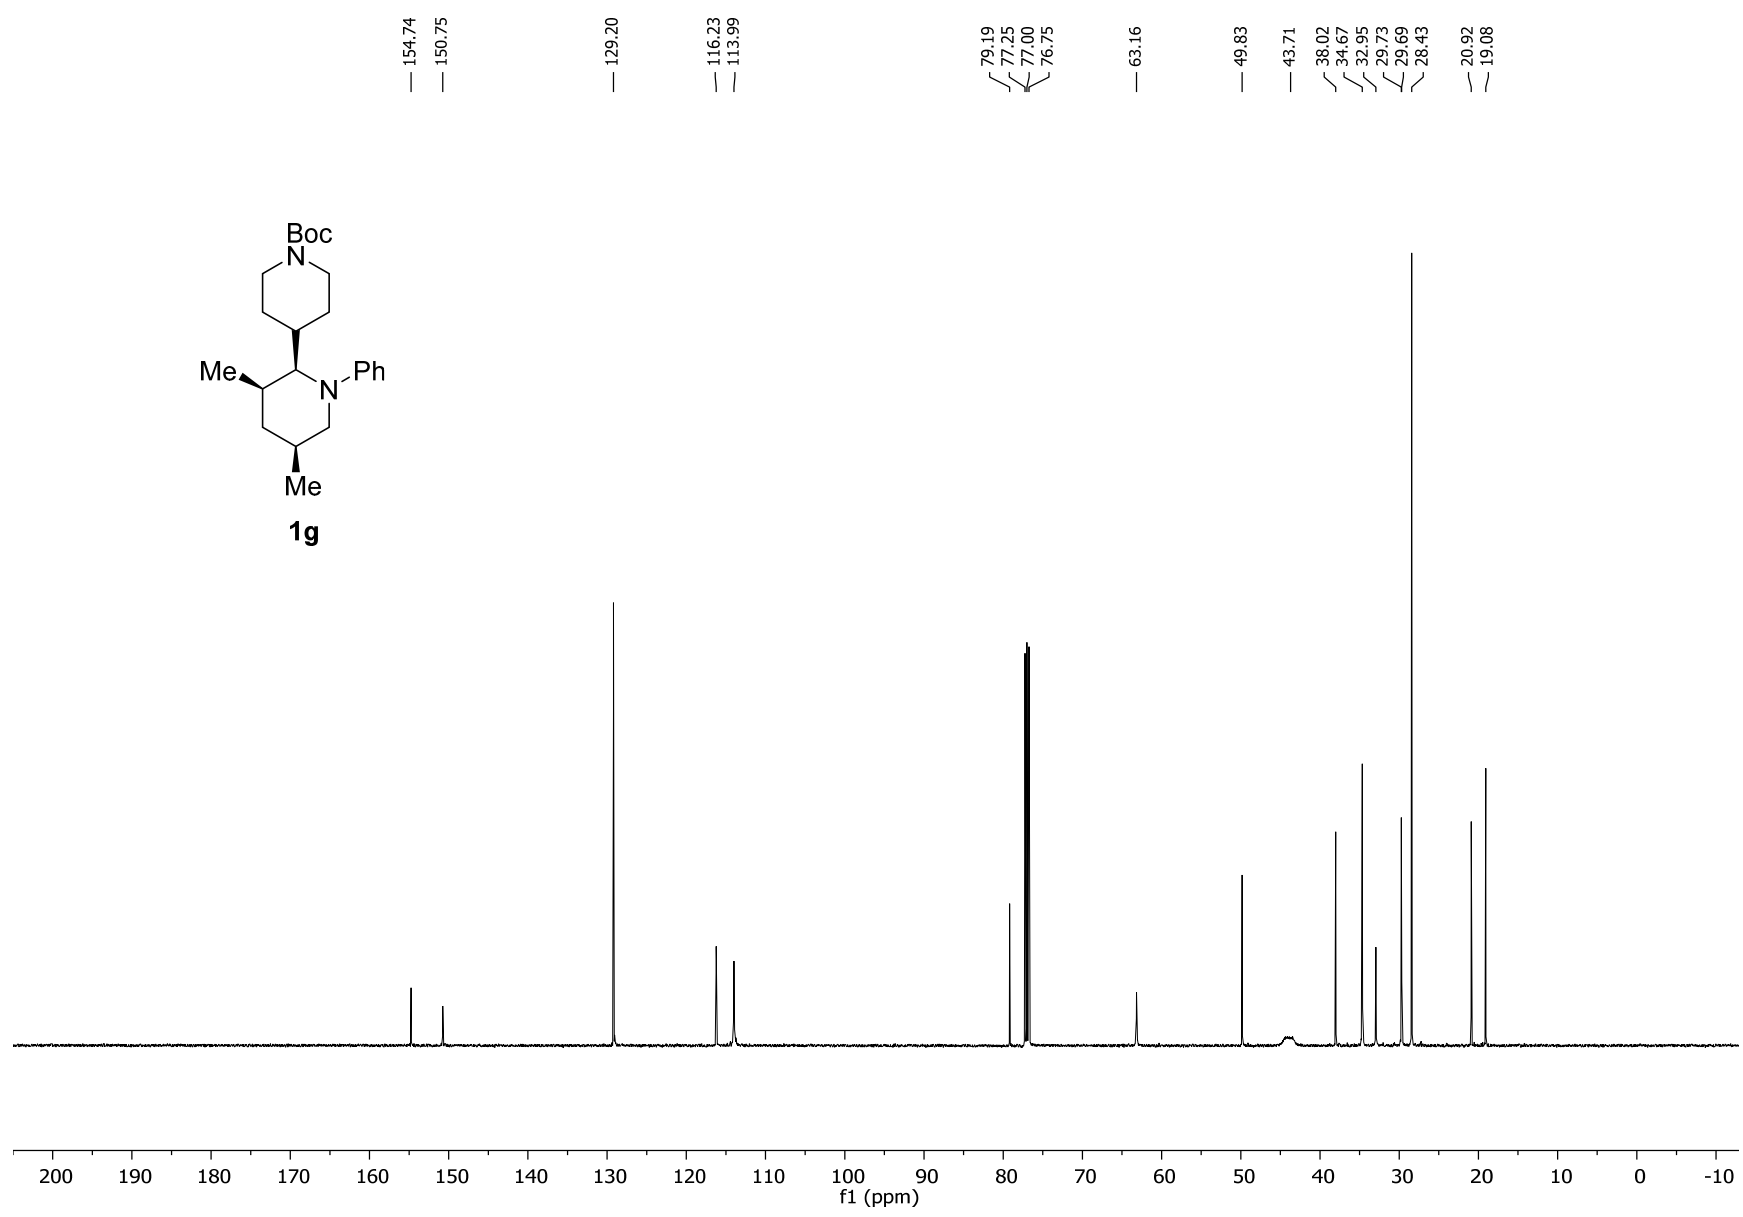

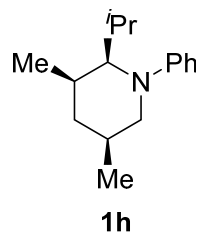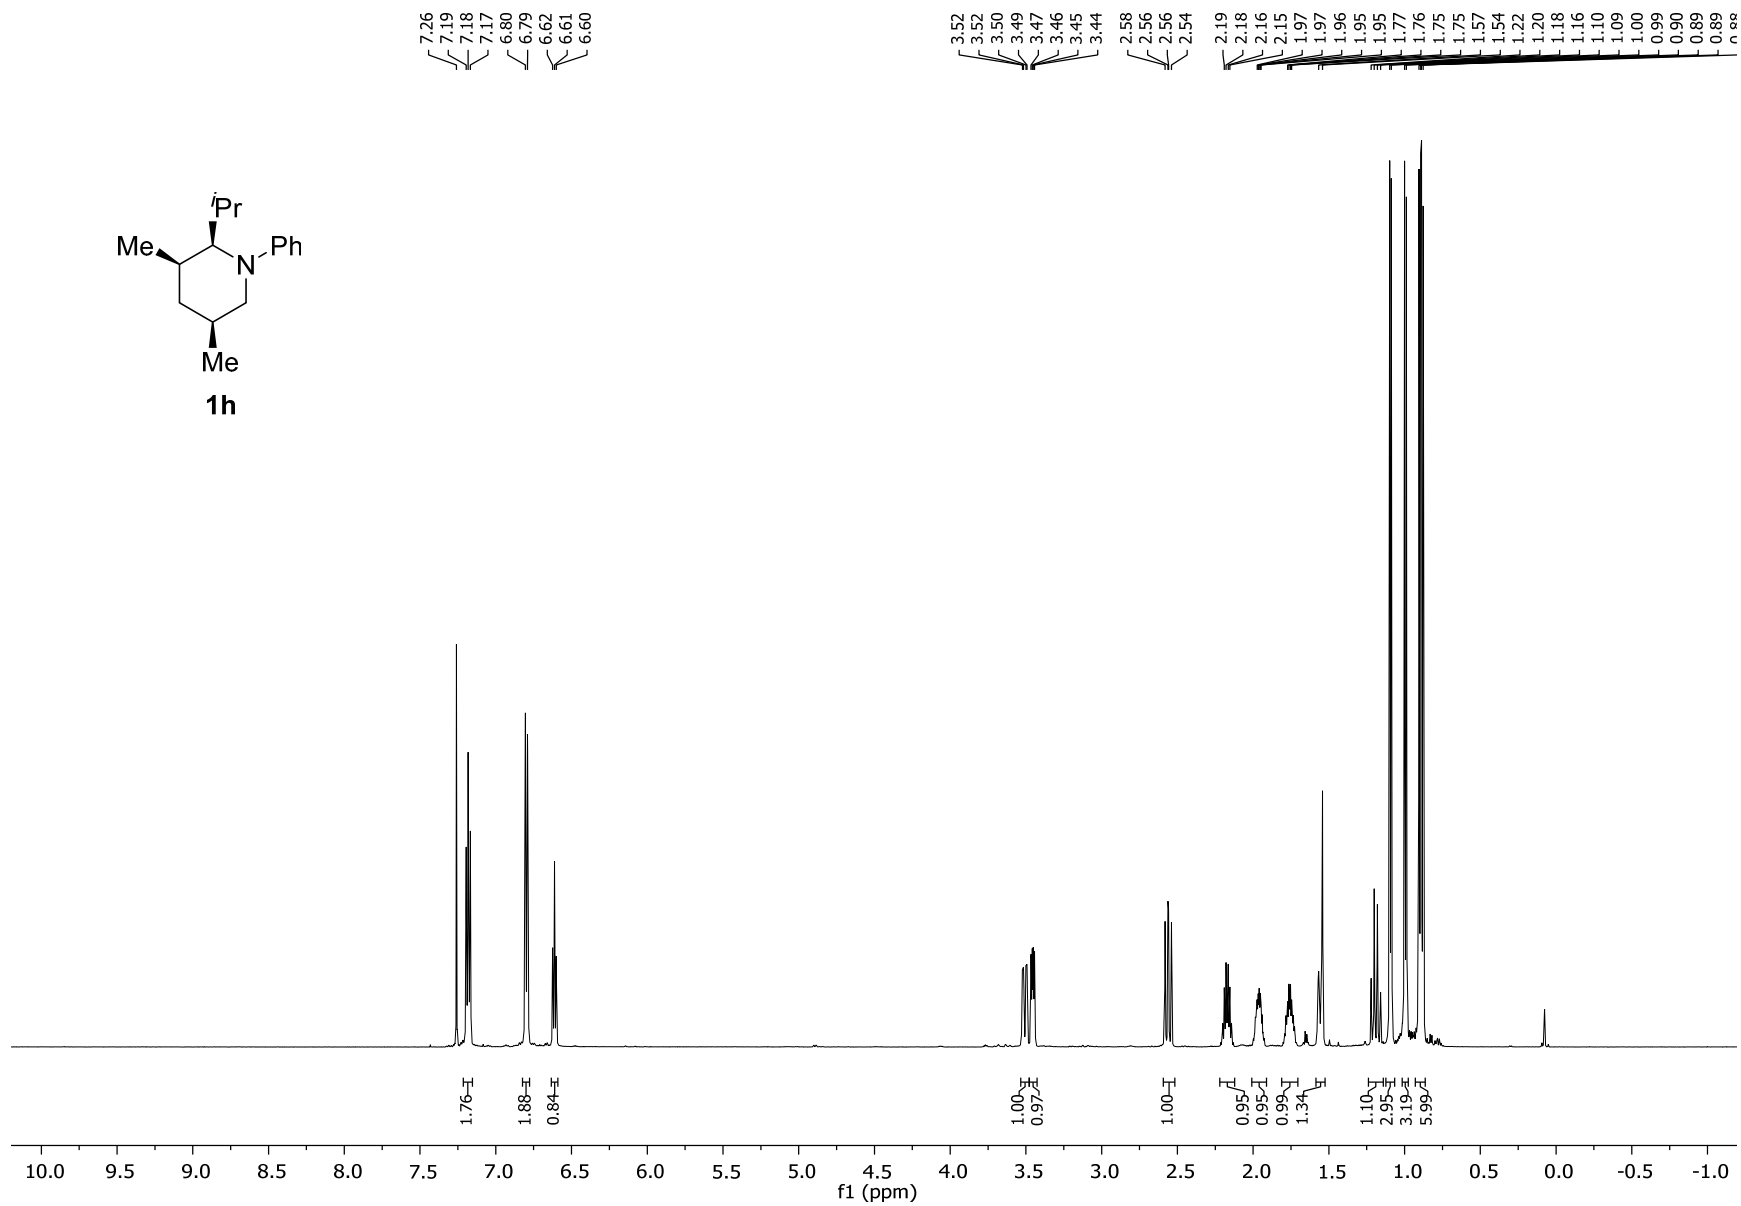

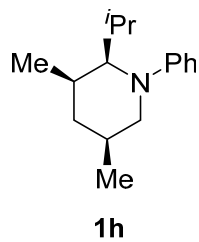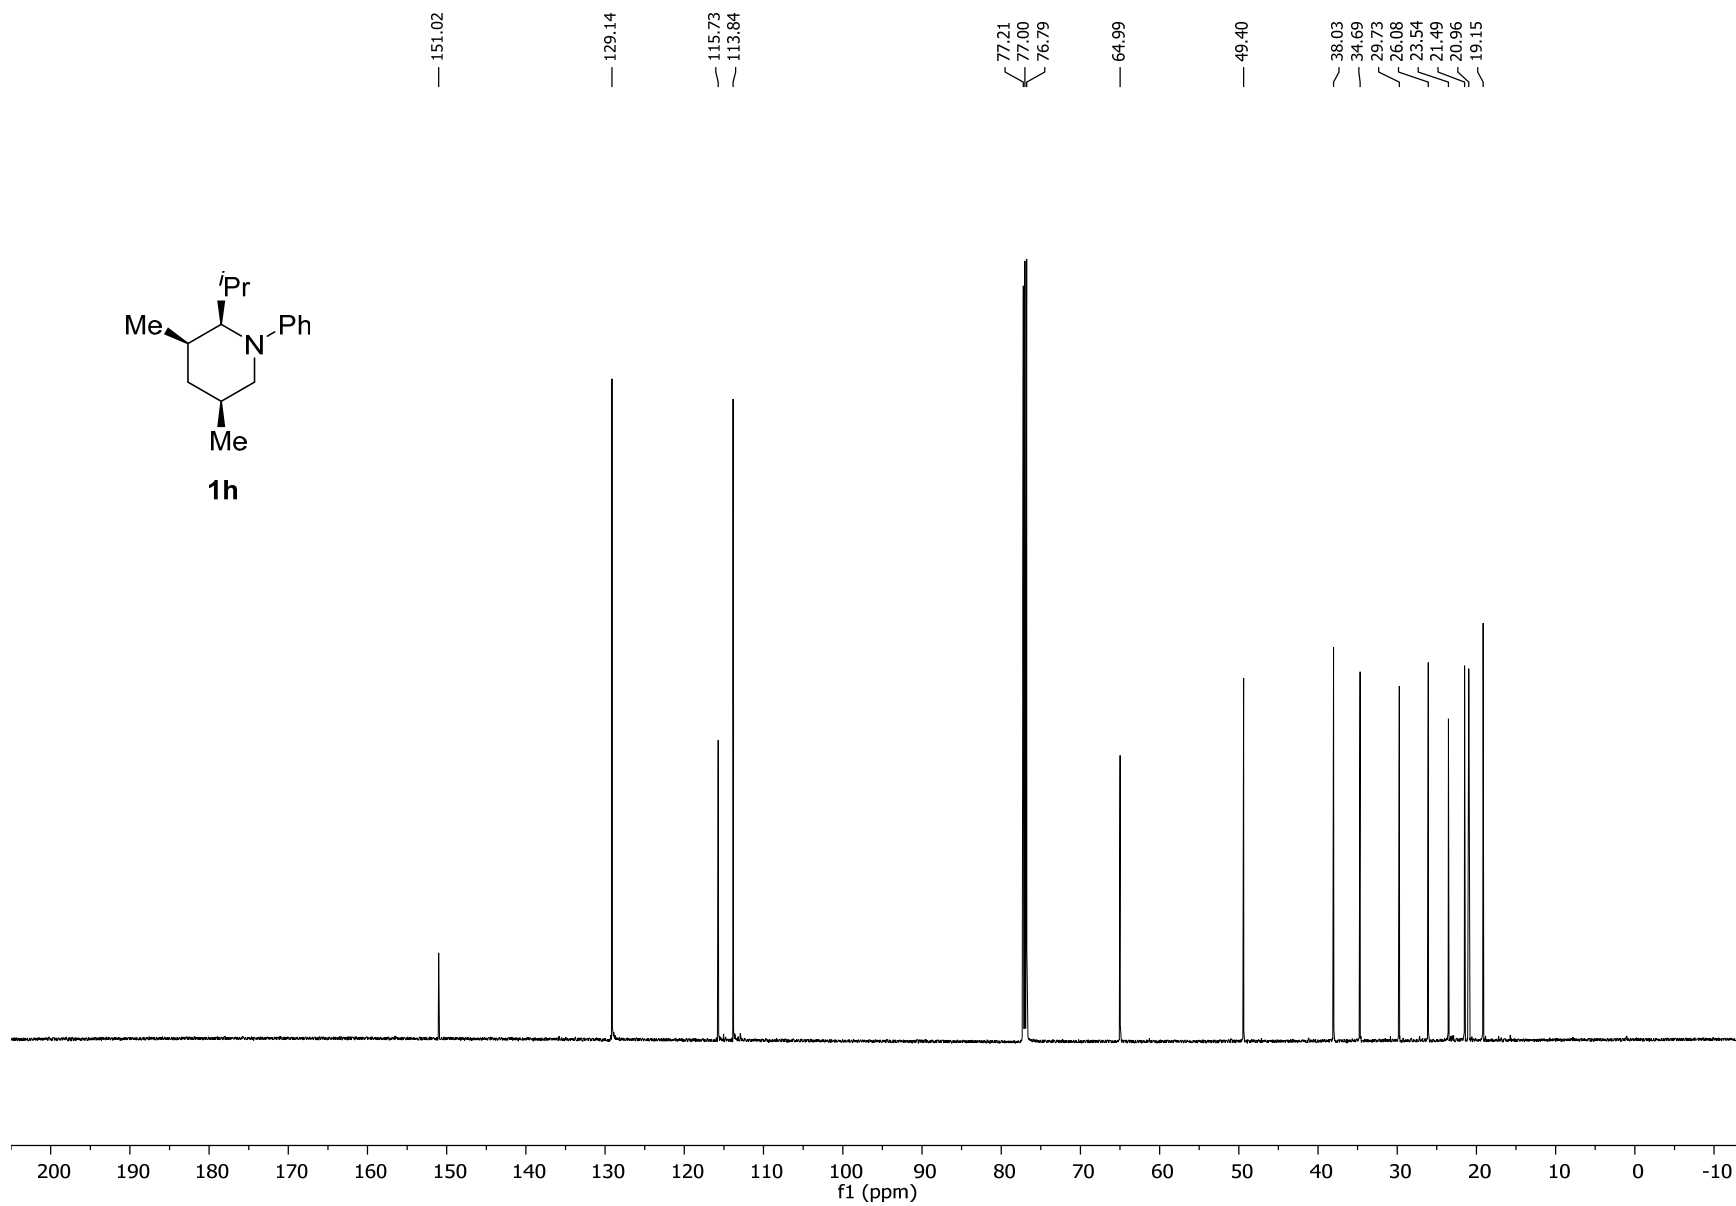

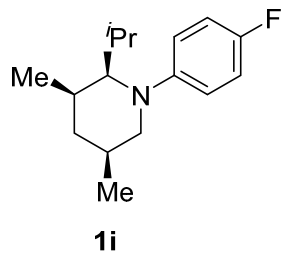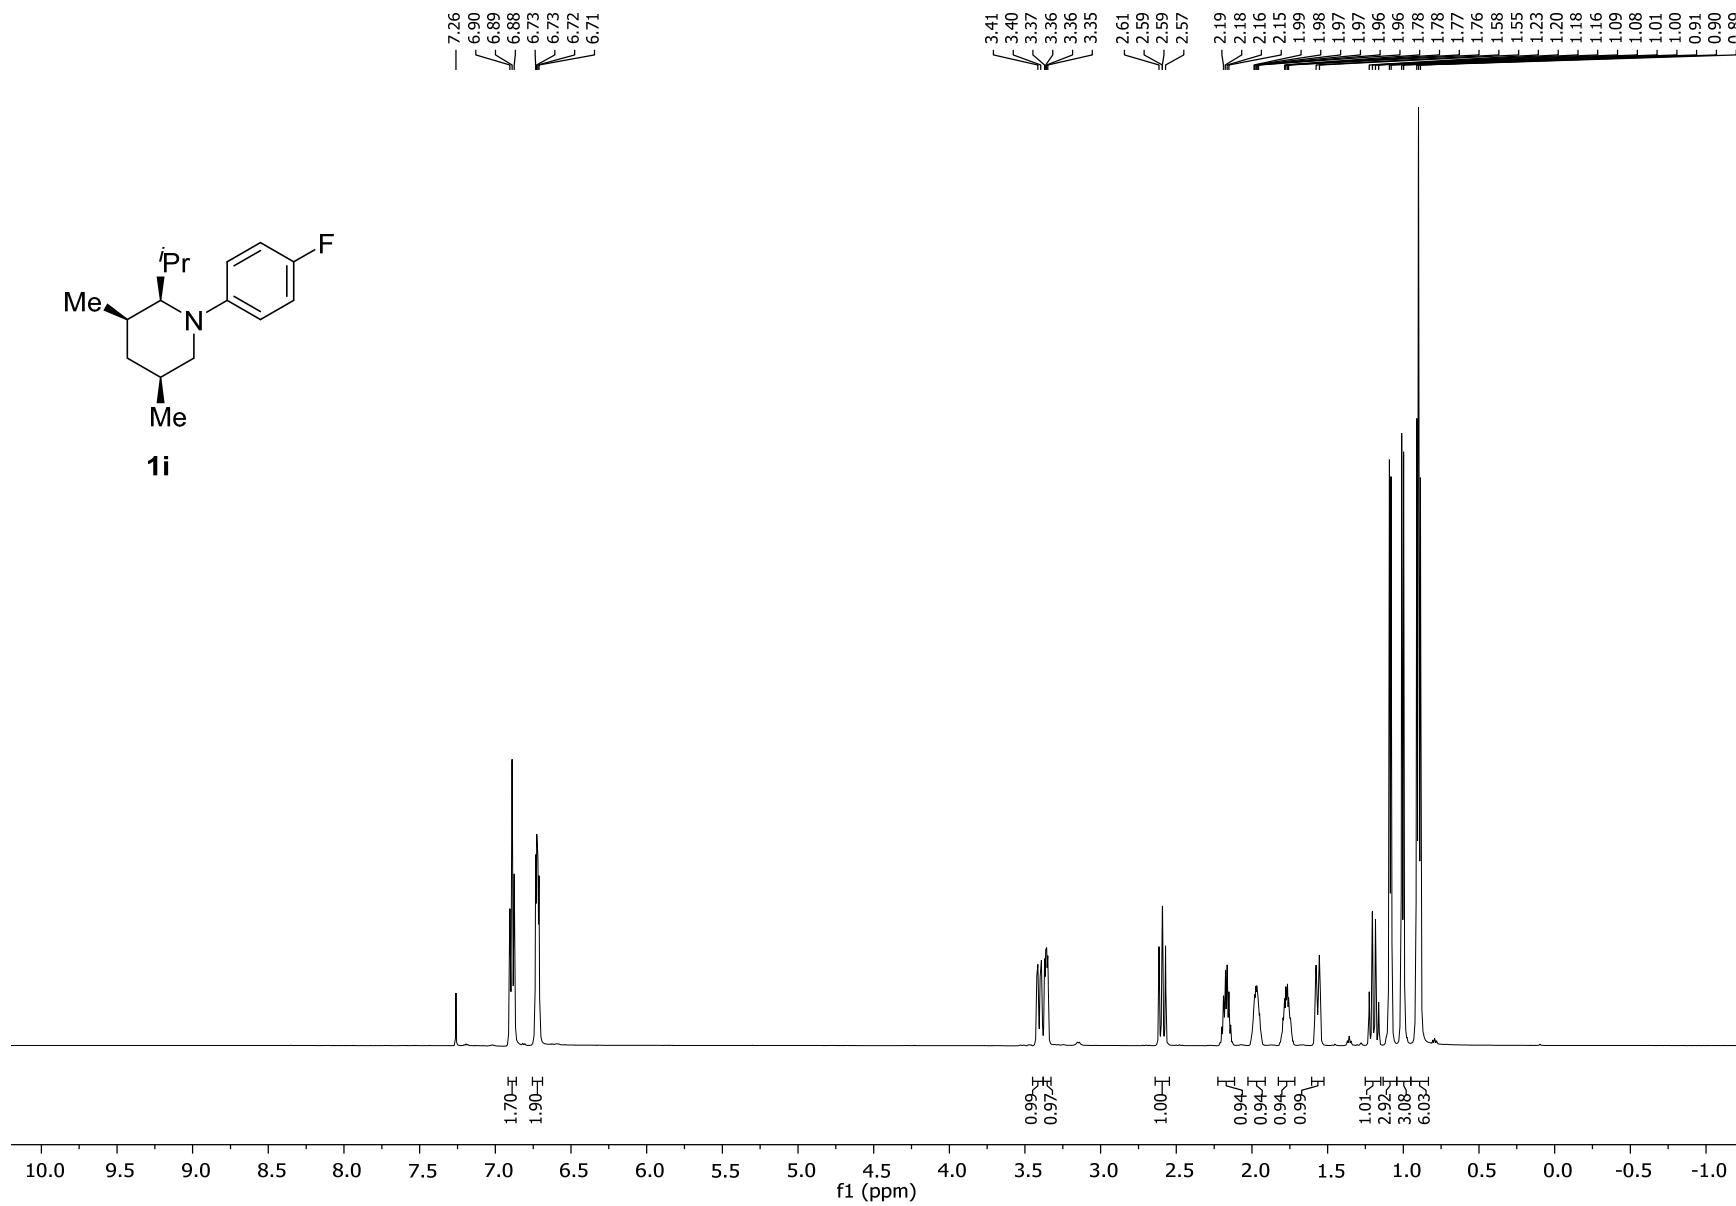

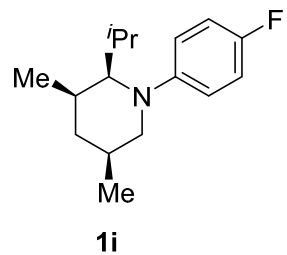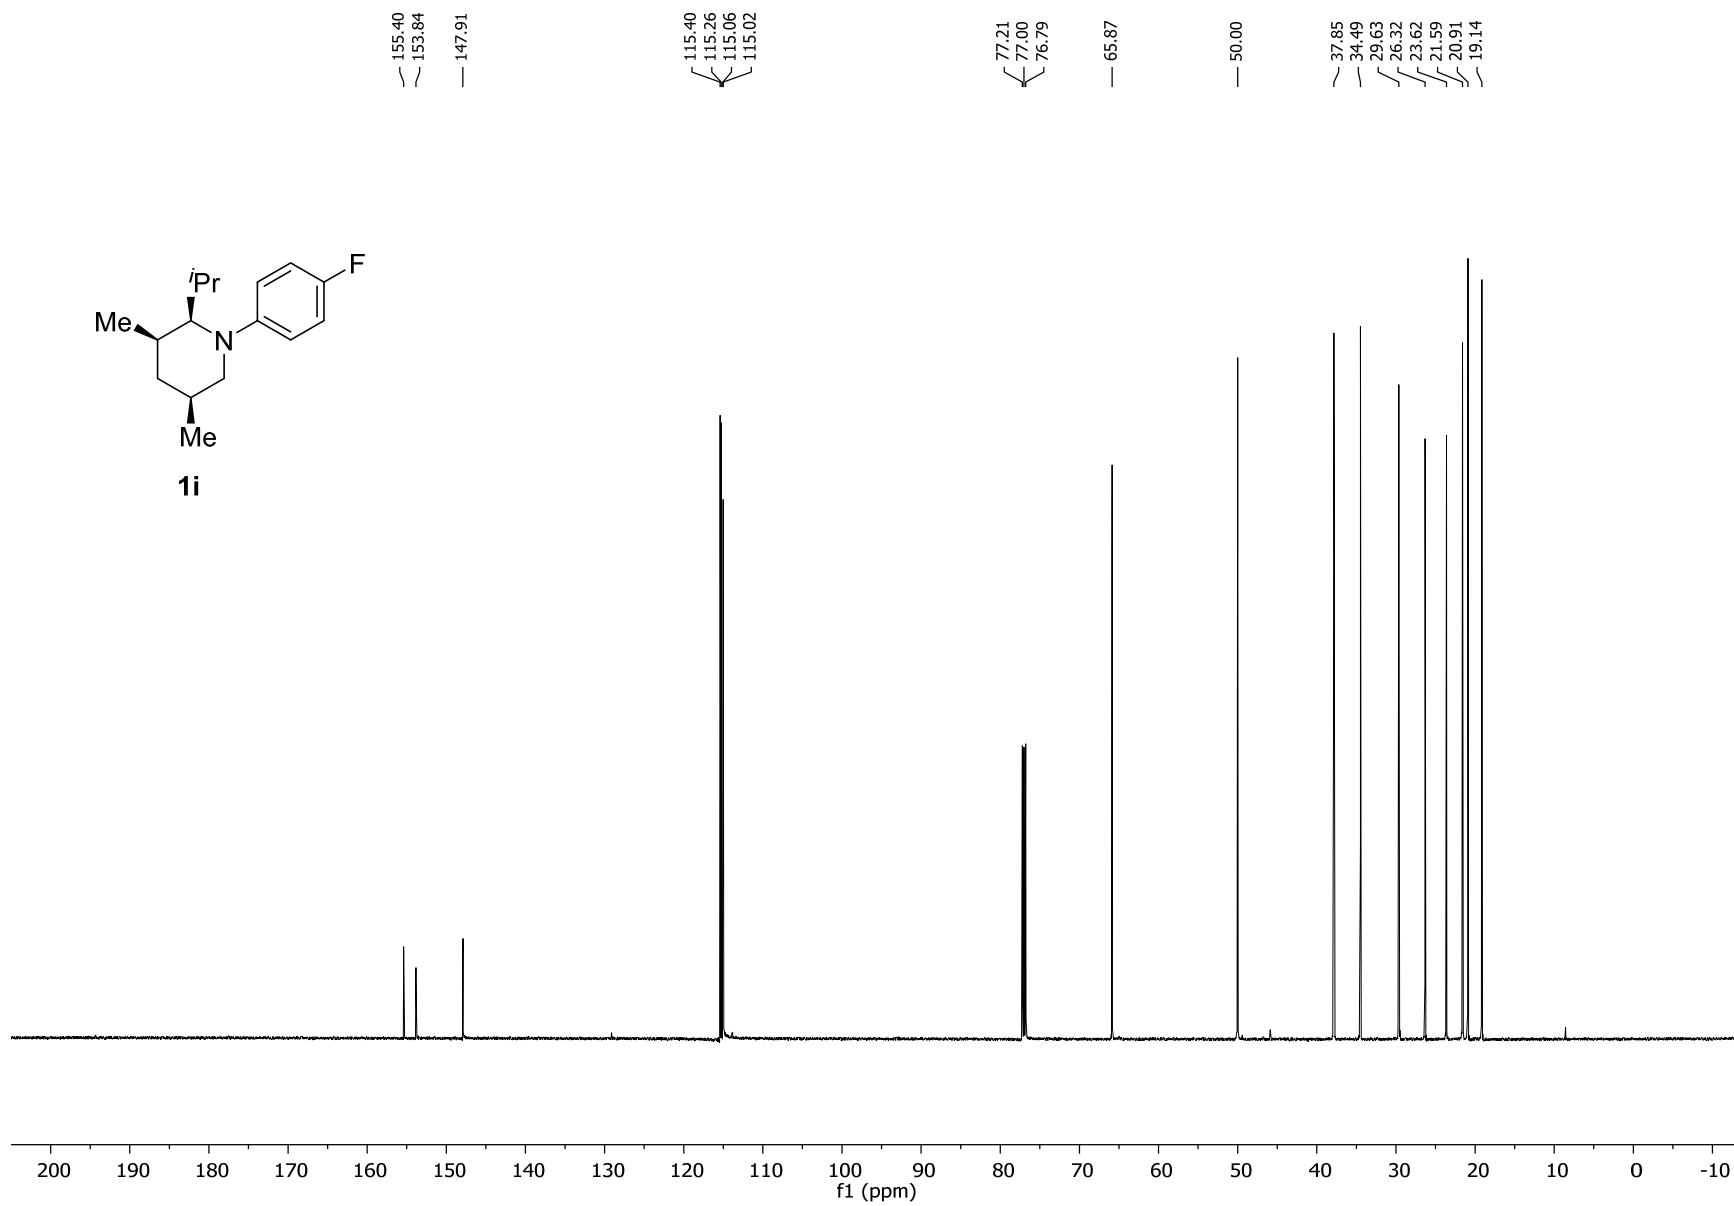

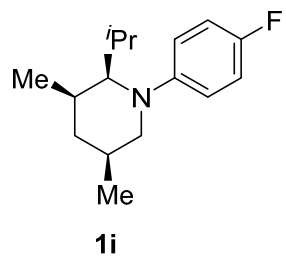

-129.79  
-129.80  
-129.81  
-129.83  
-129.84  
-129.85  
-129.86  
-129.87  
-129.88

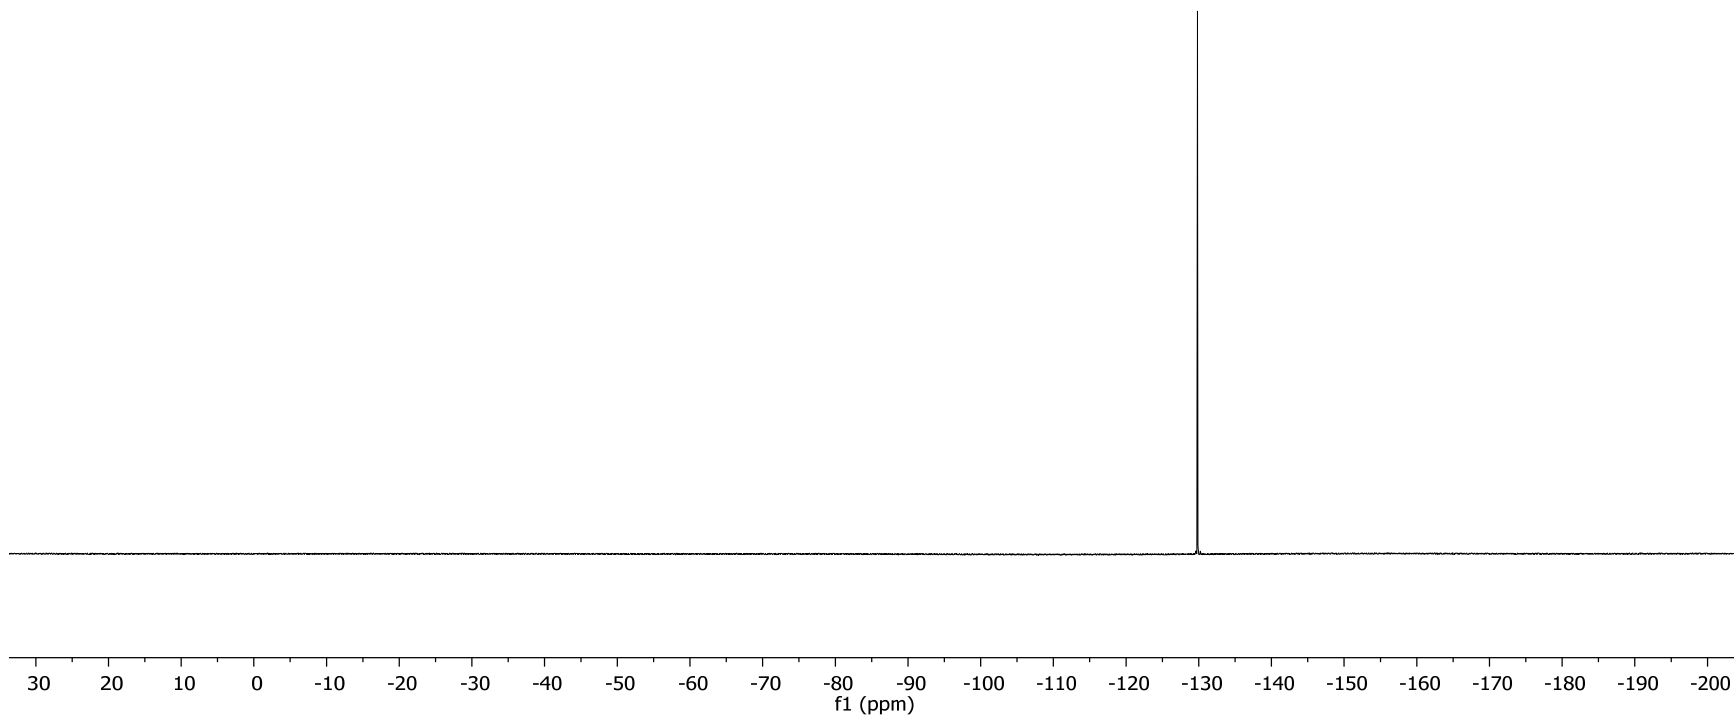

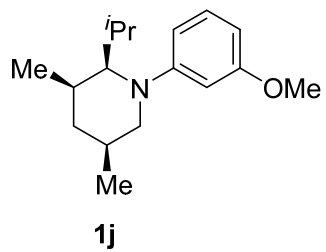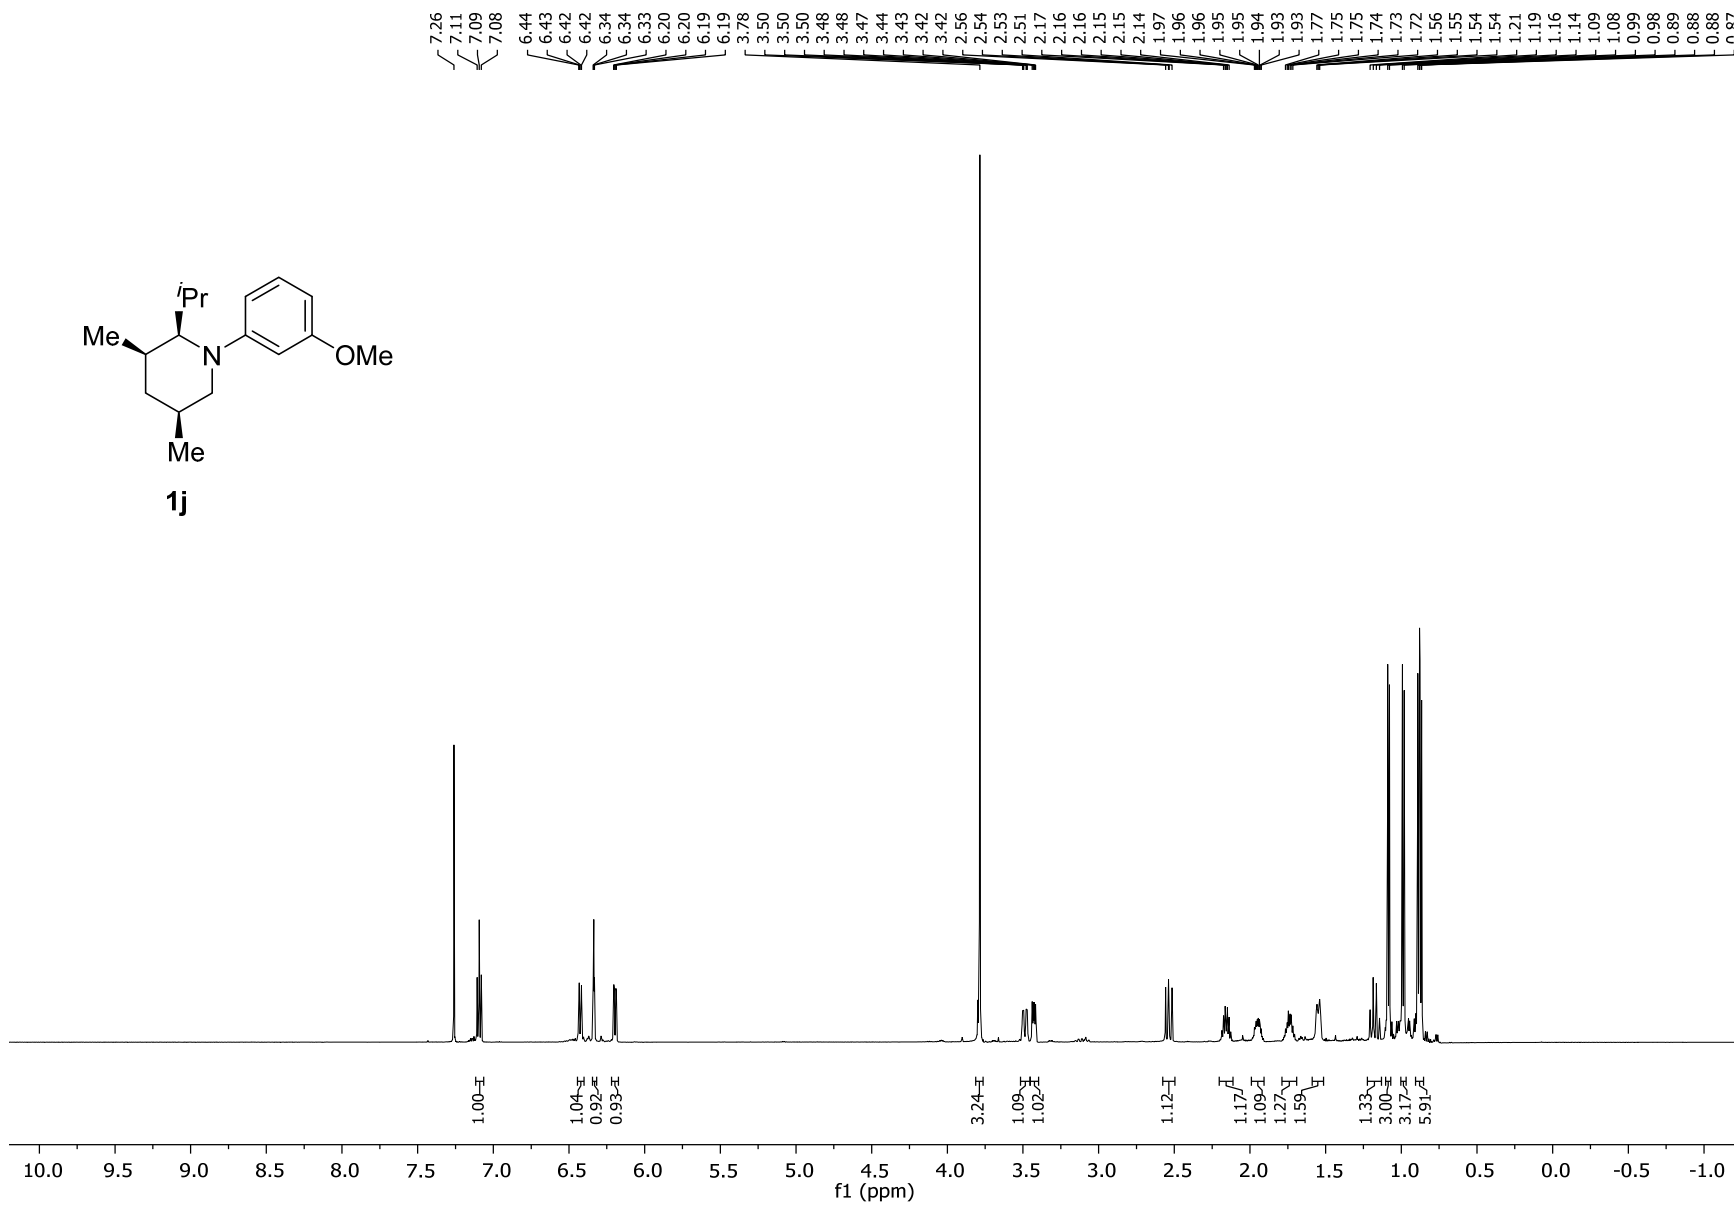



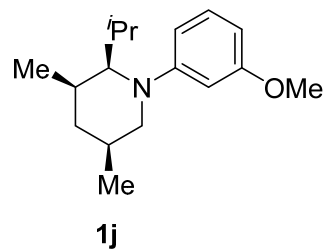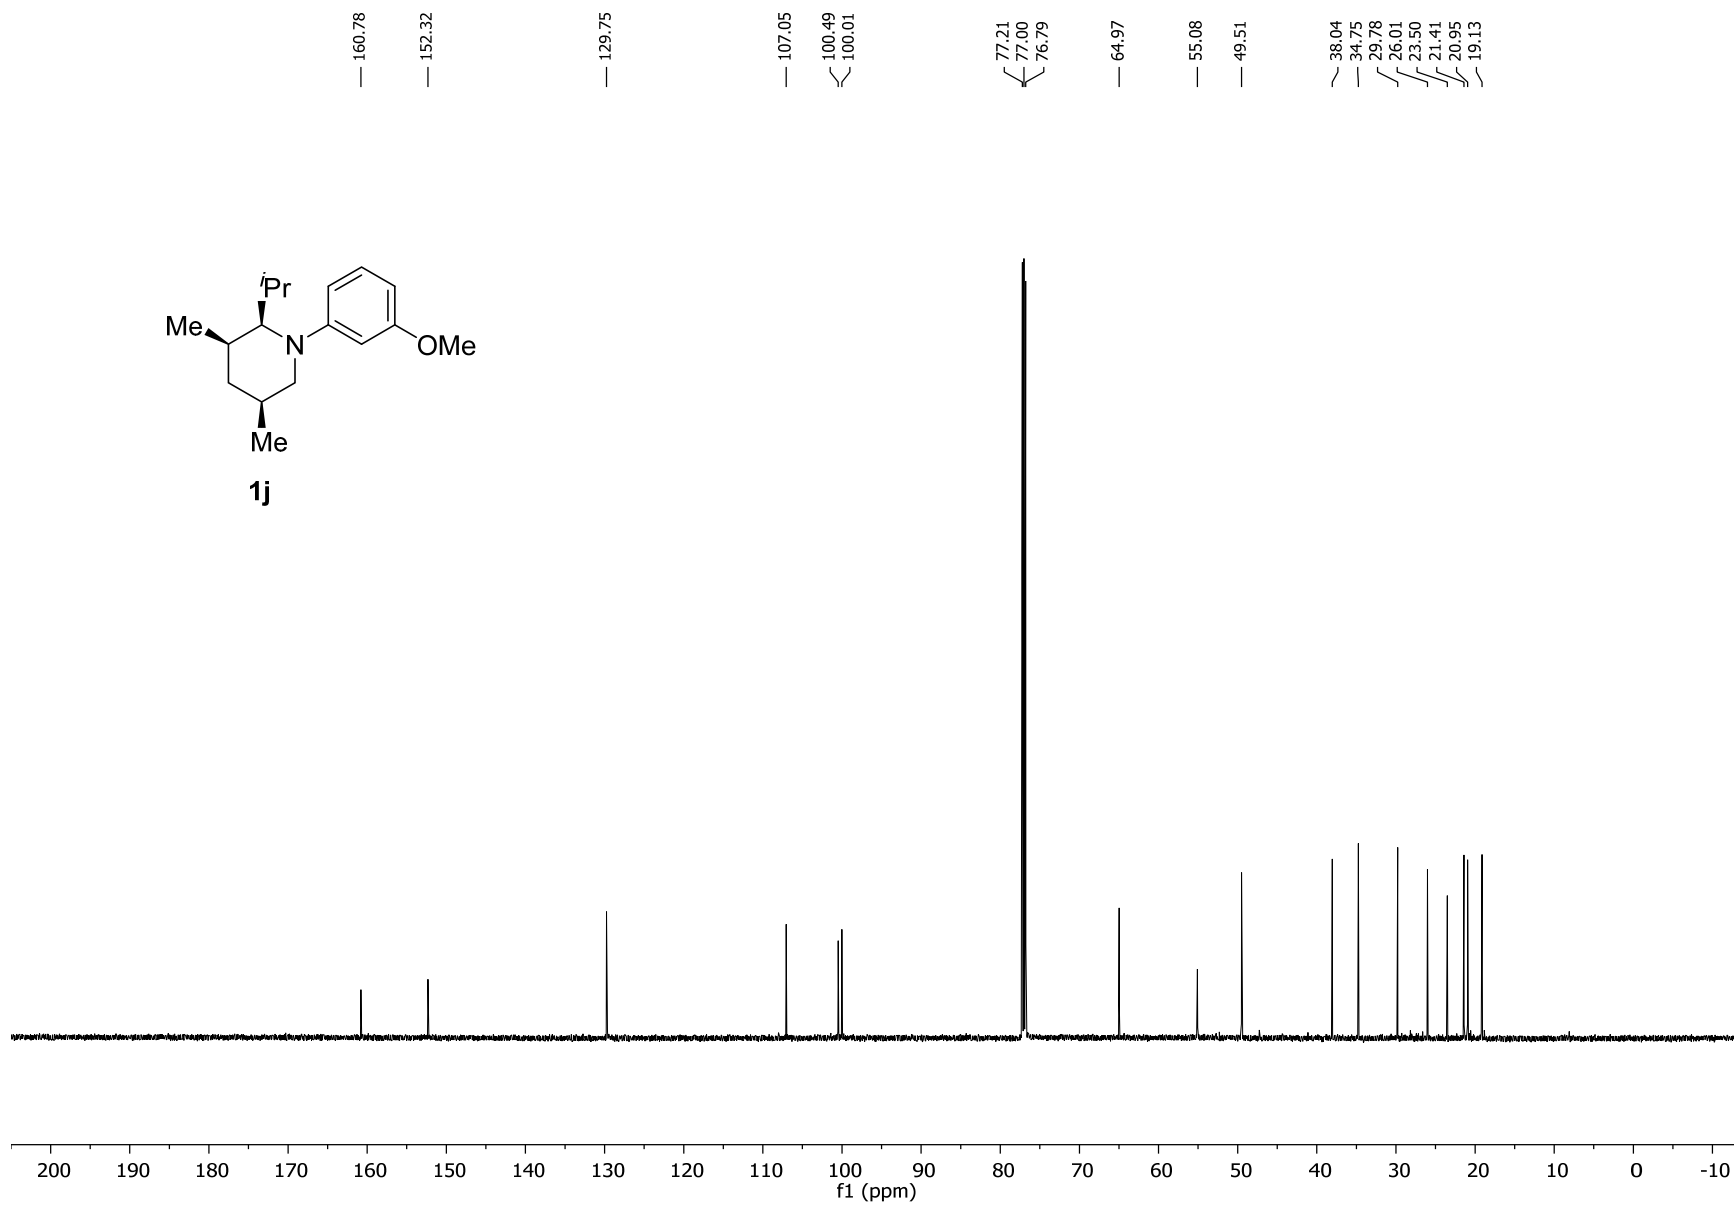

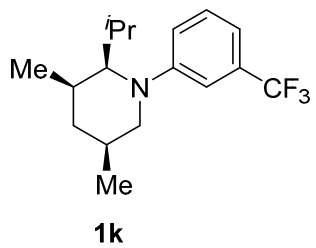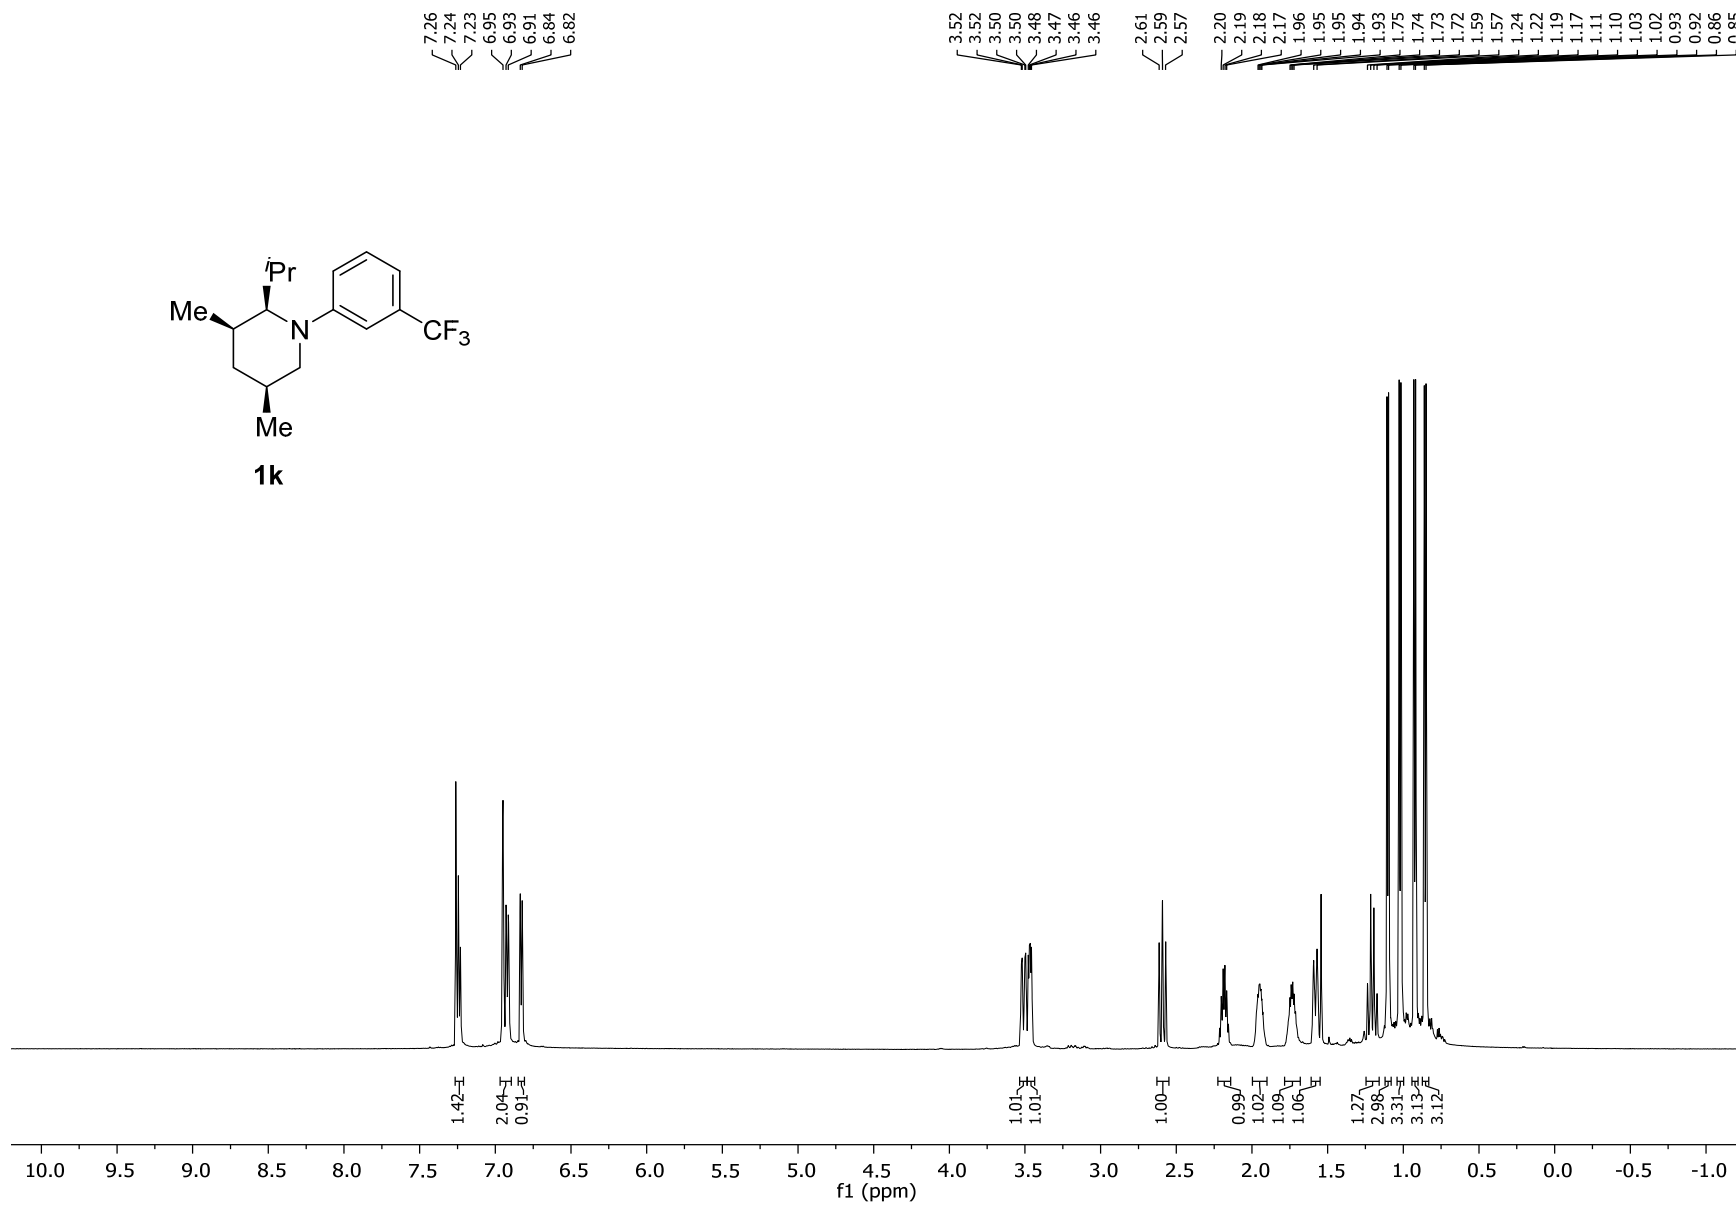

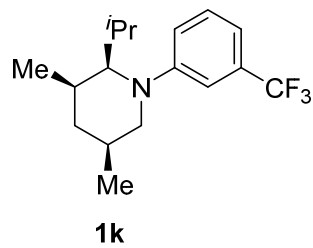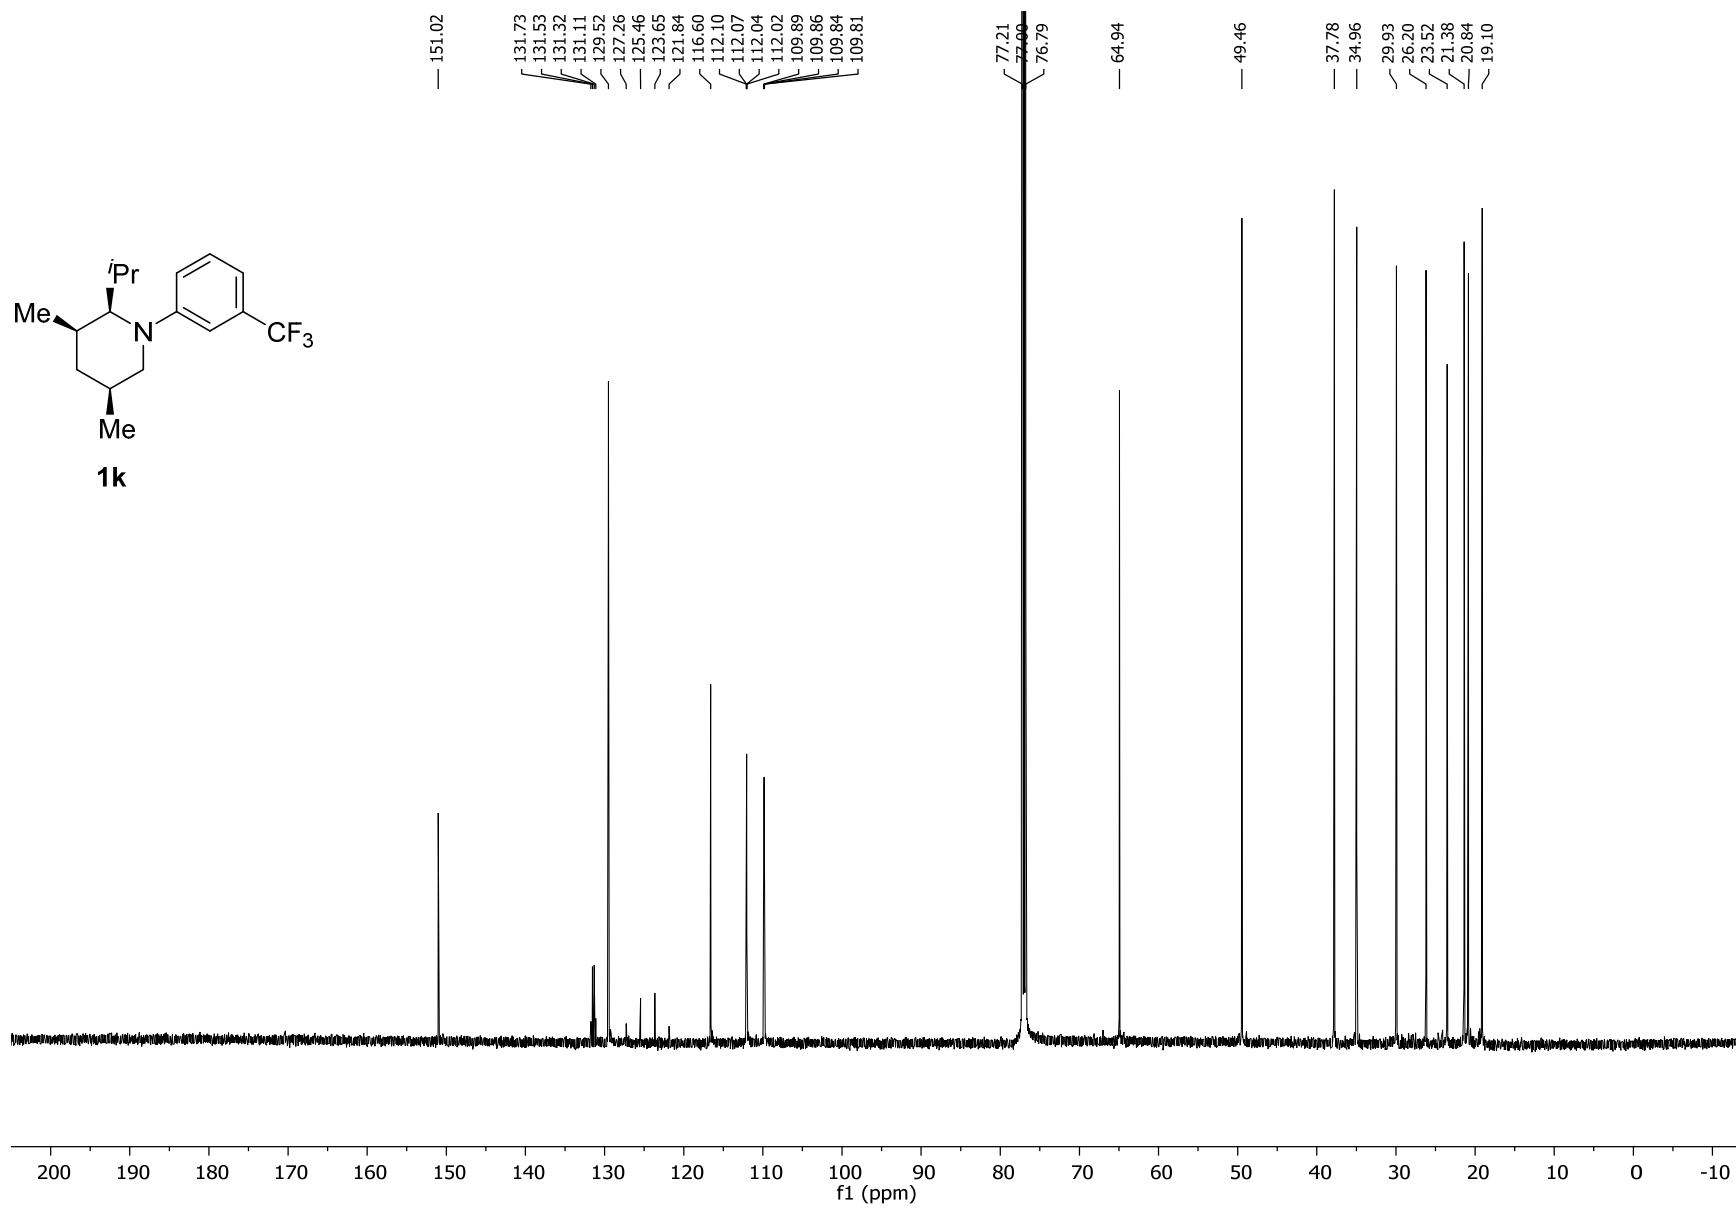

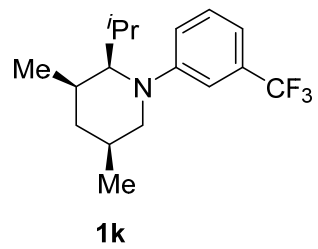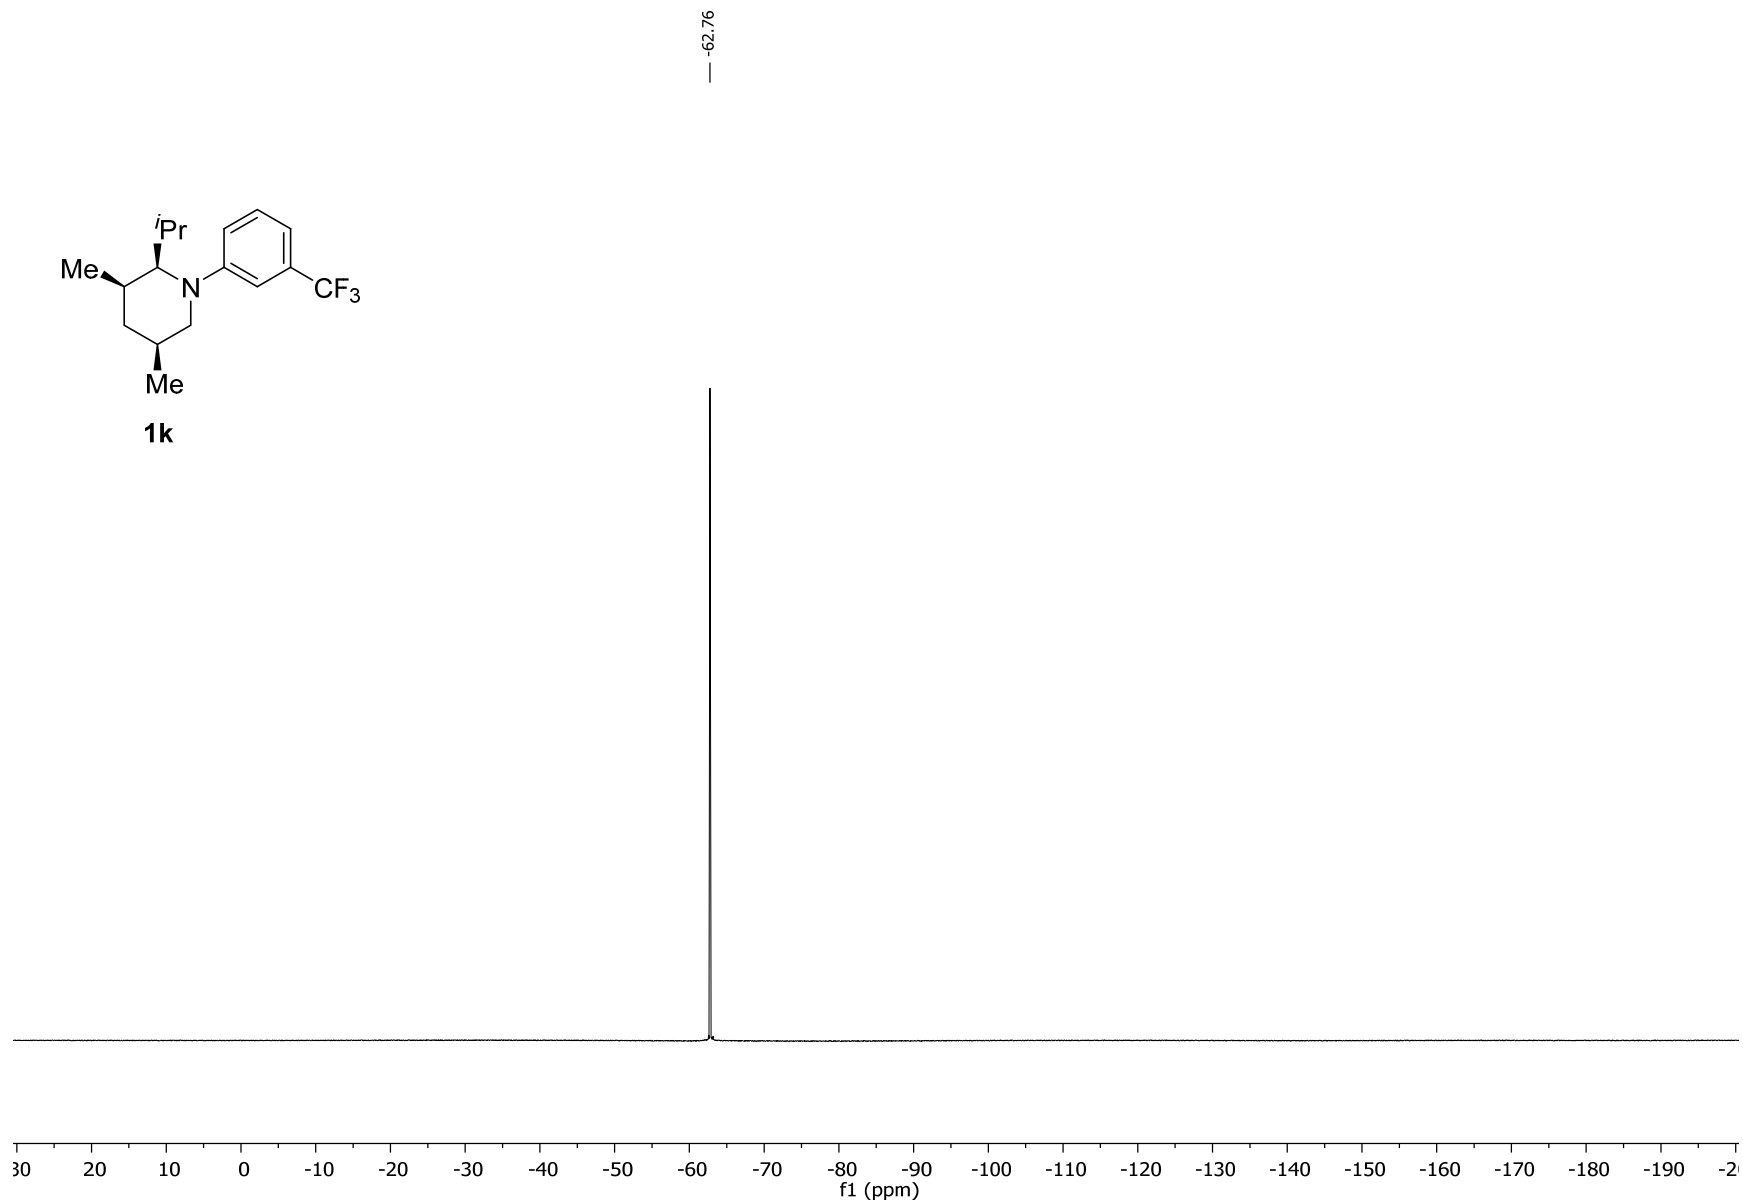

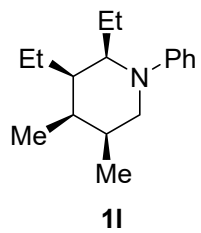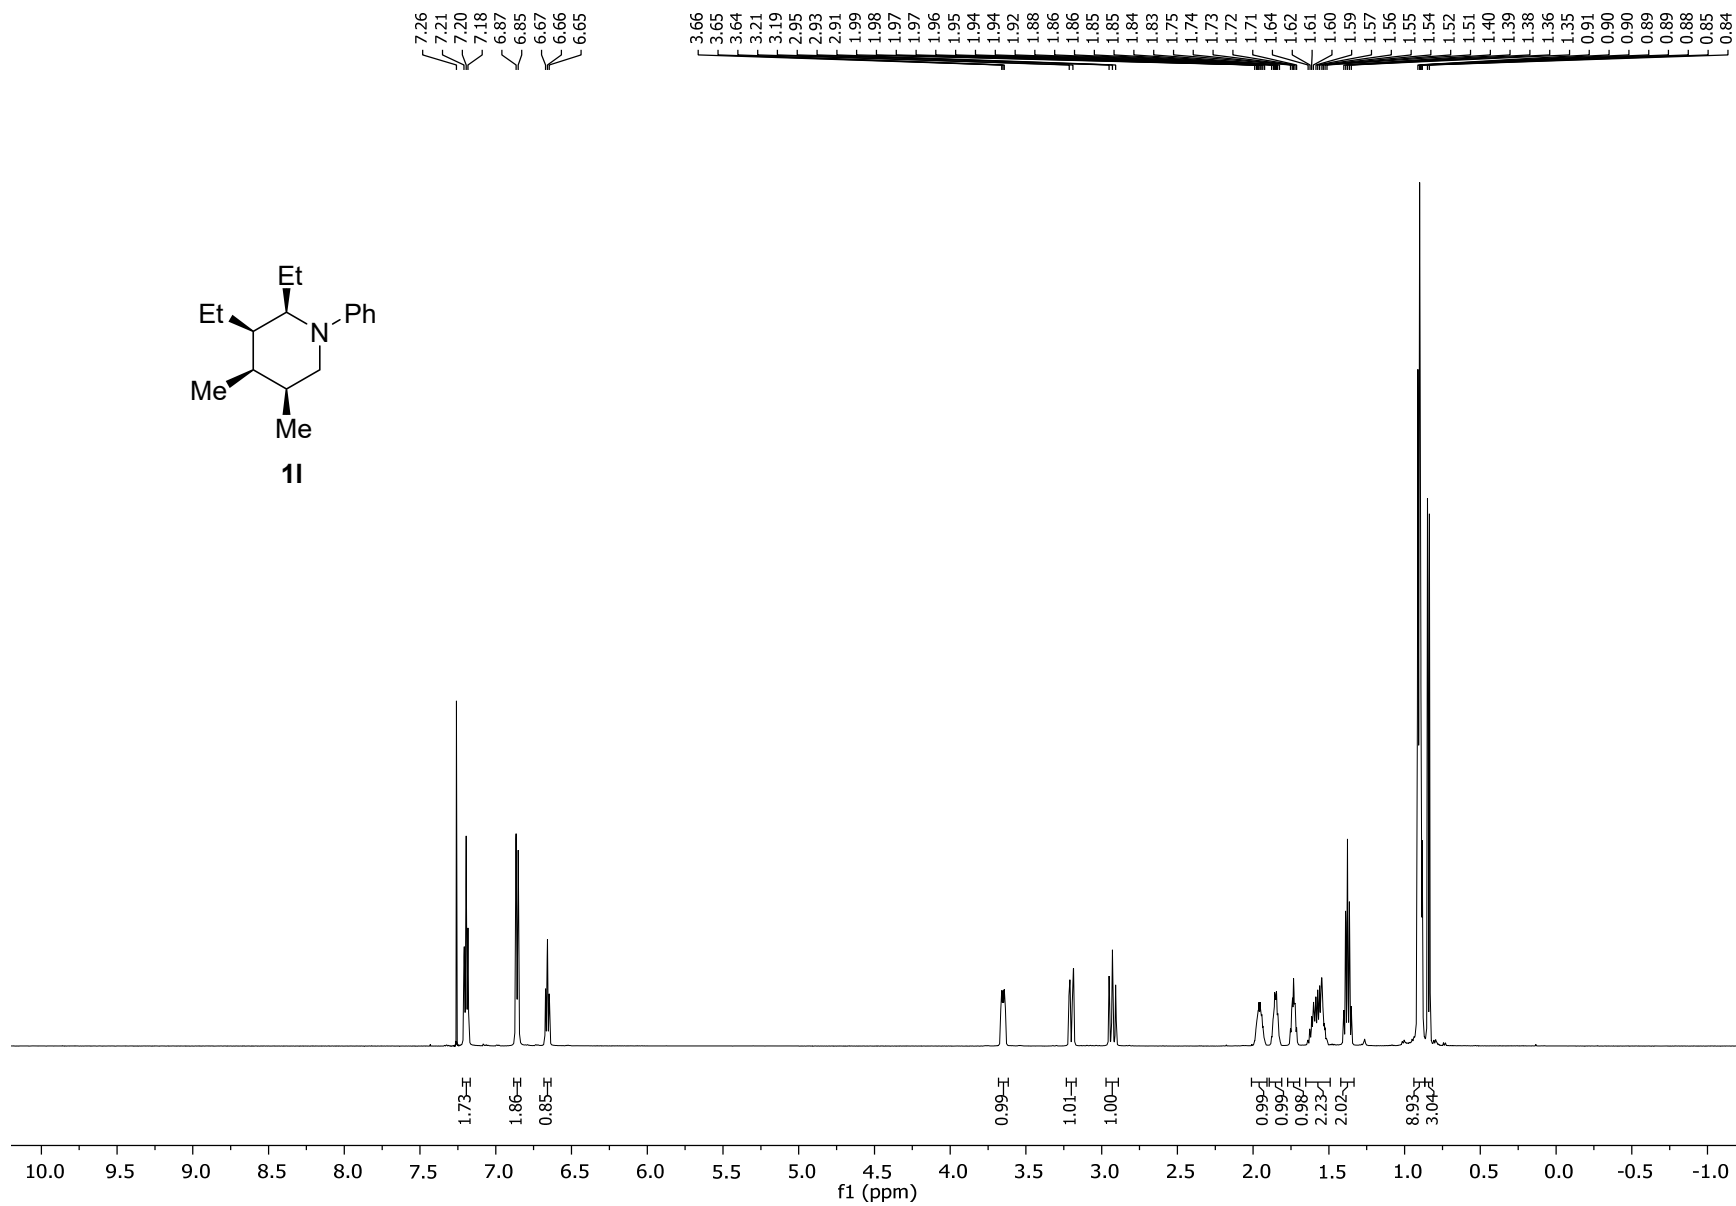

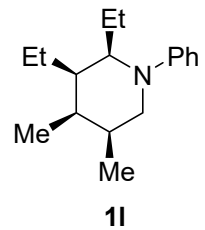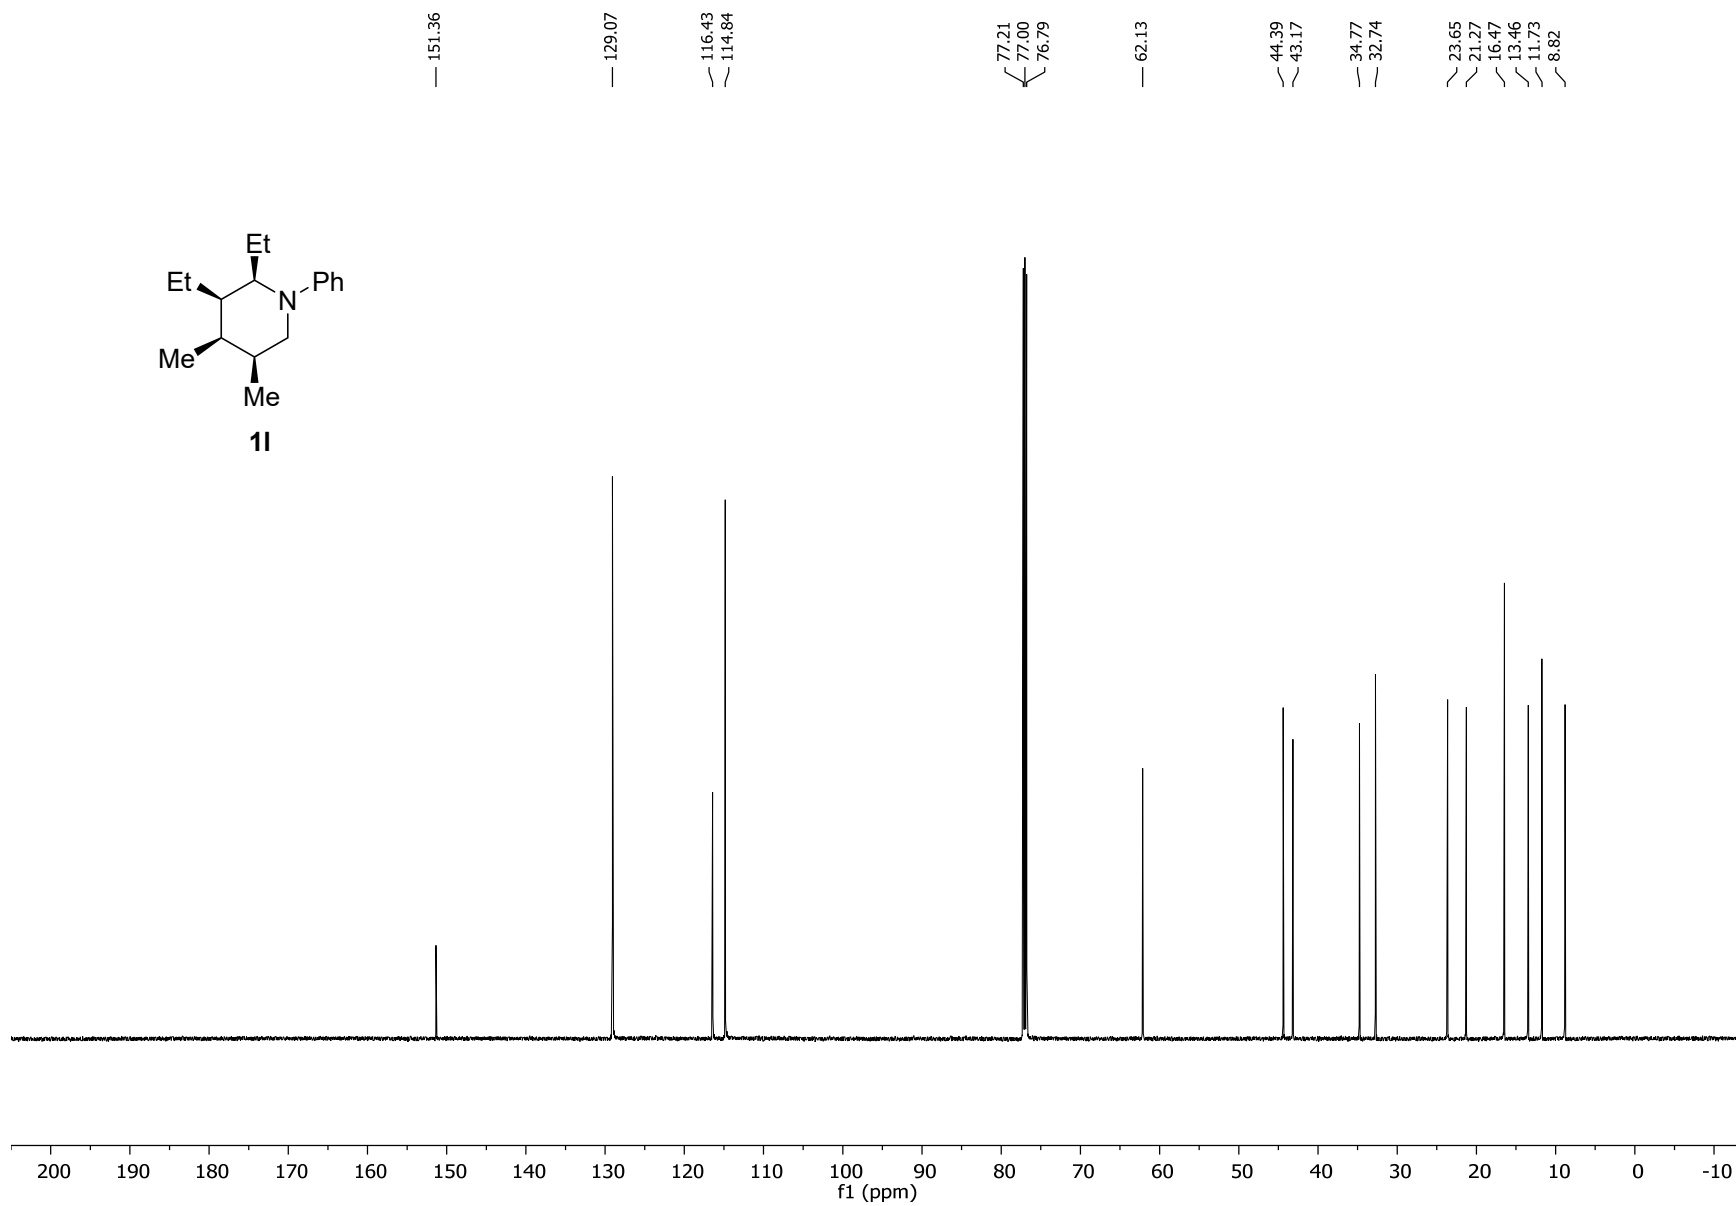

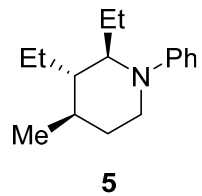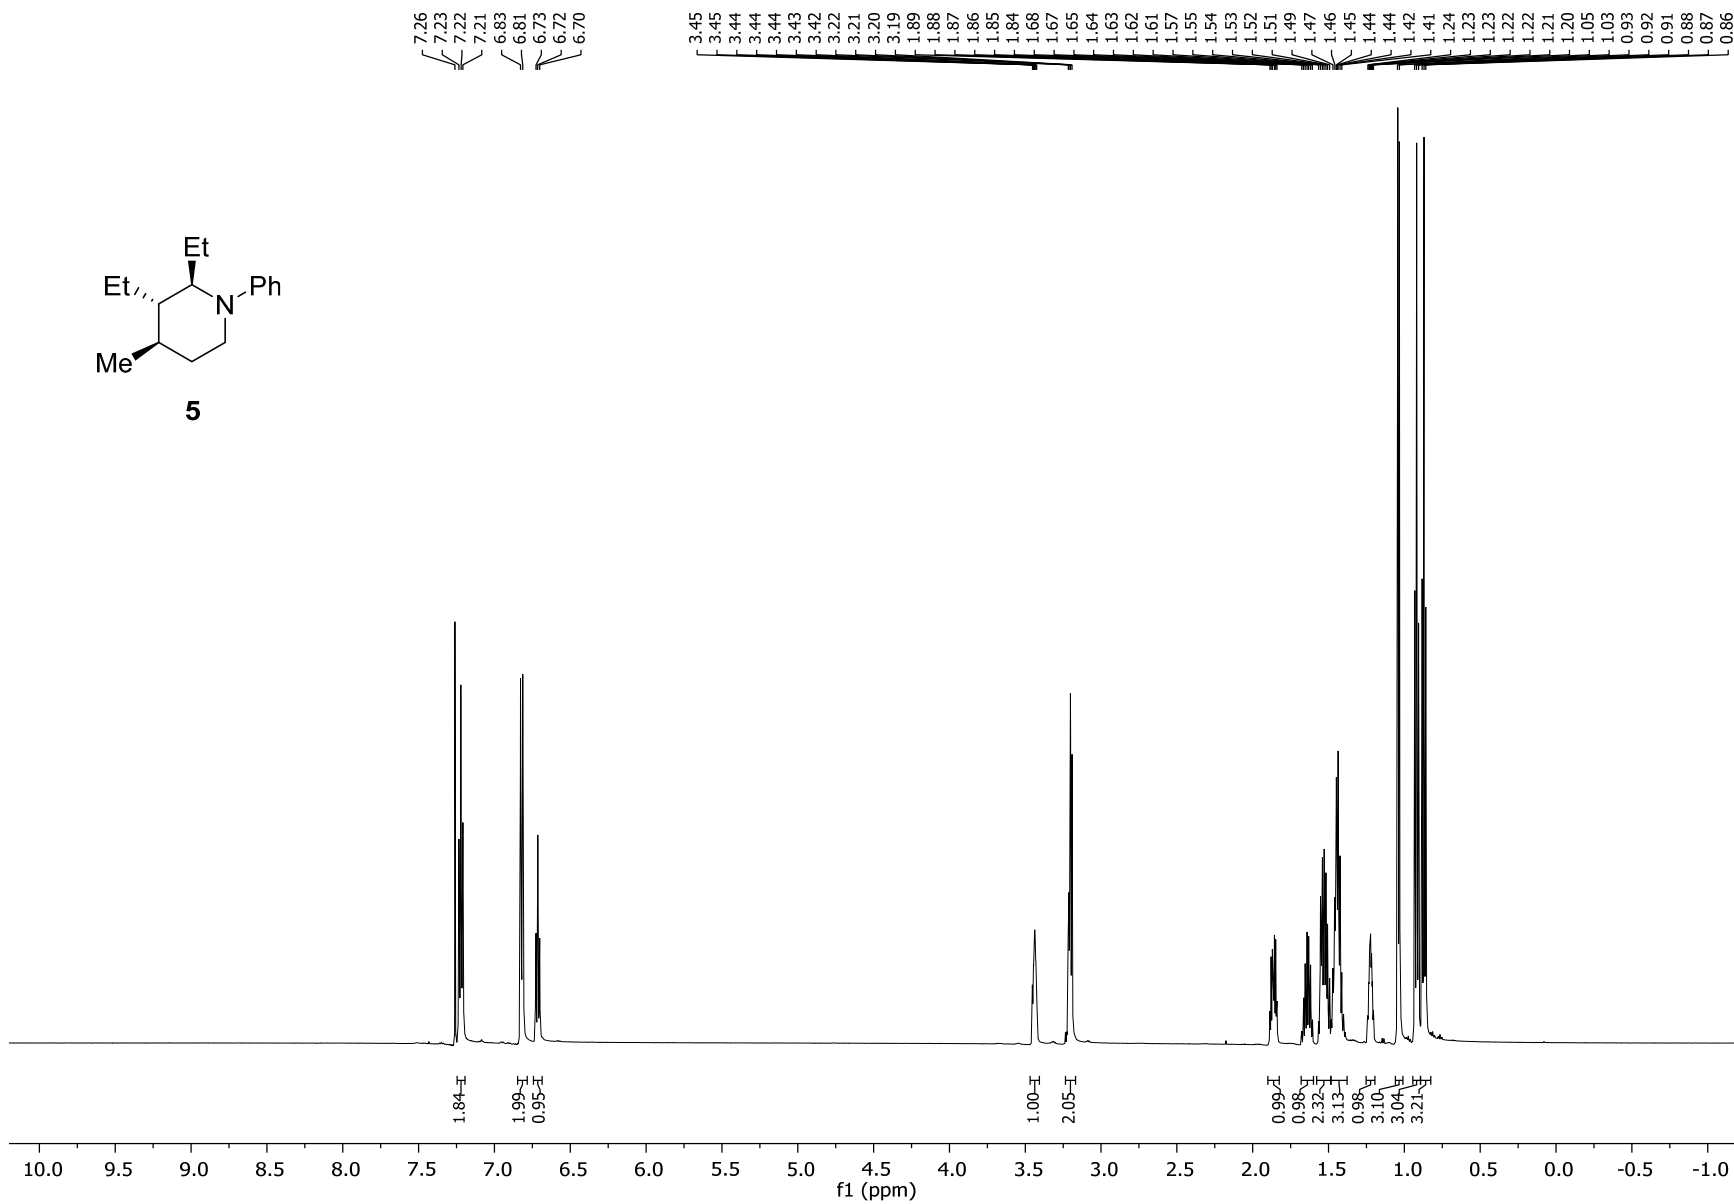

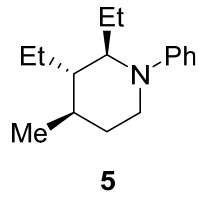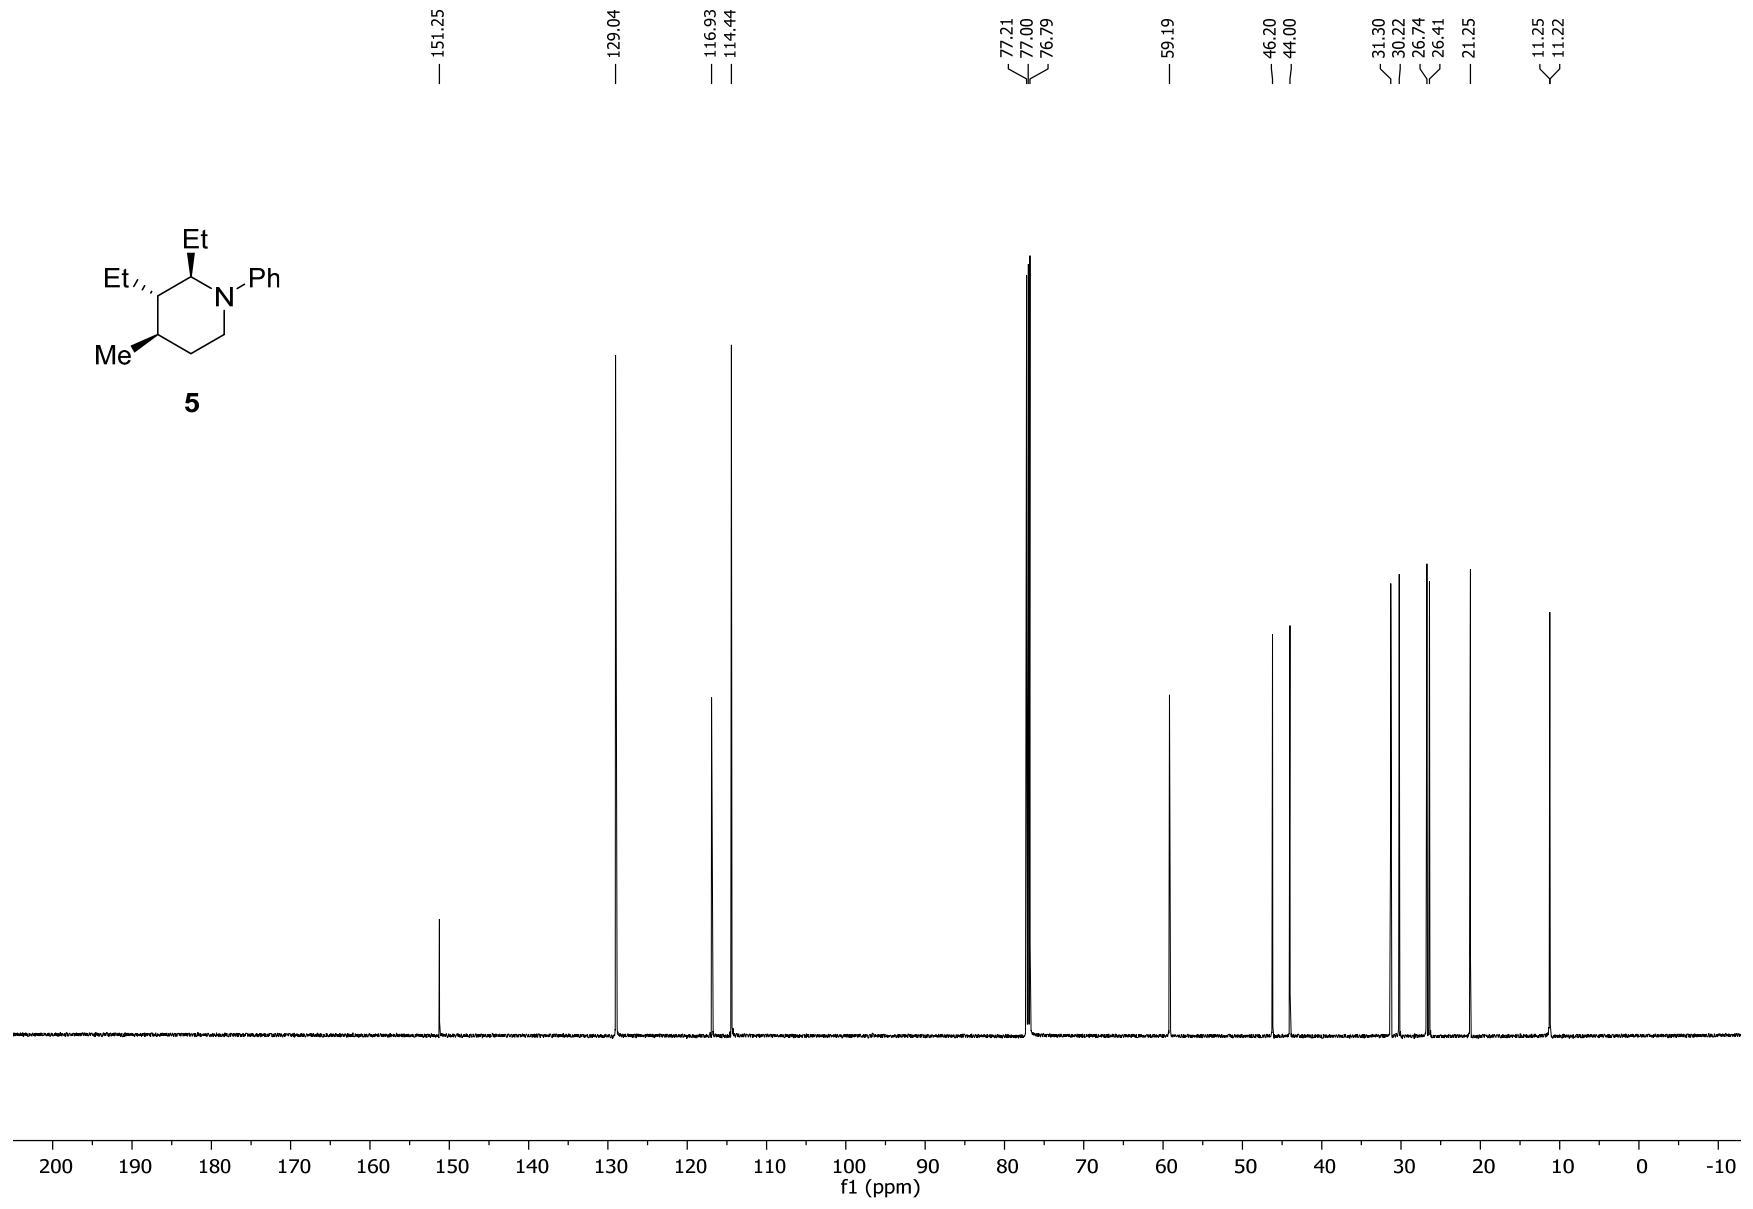



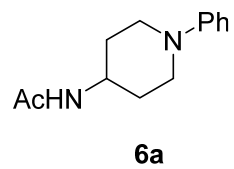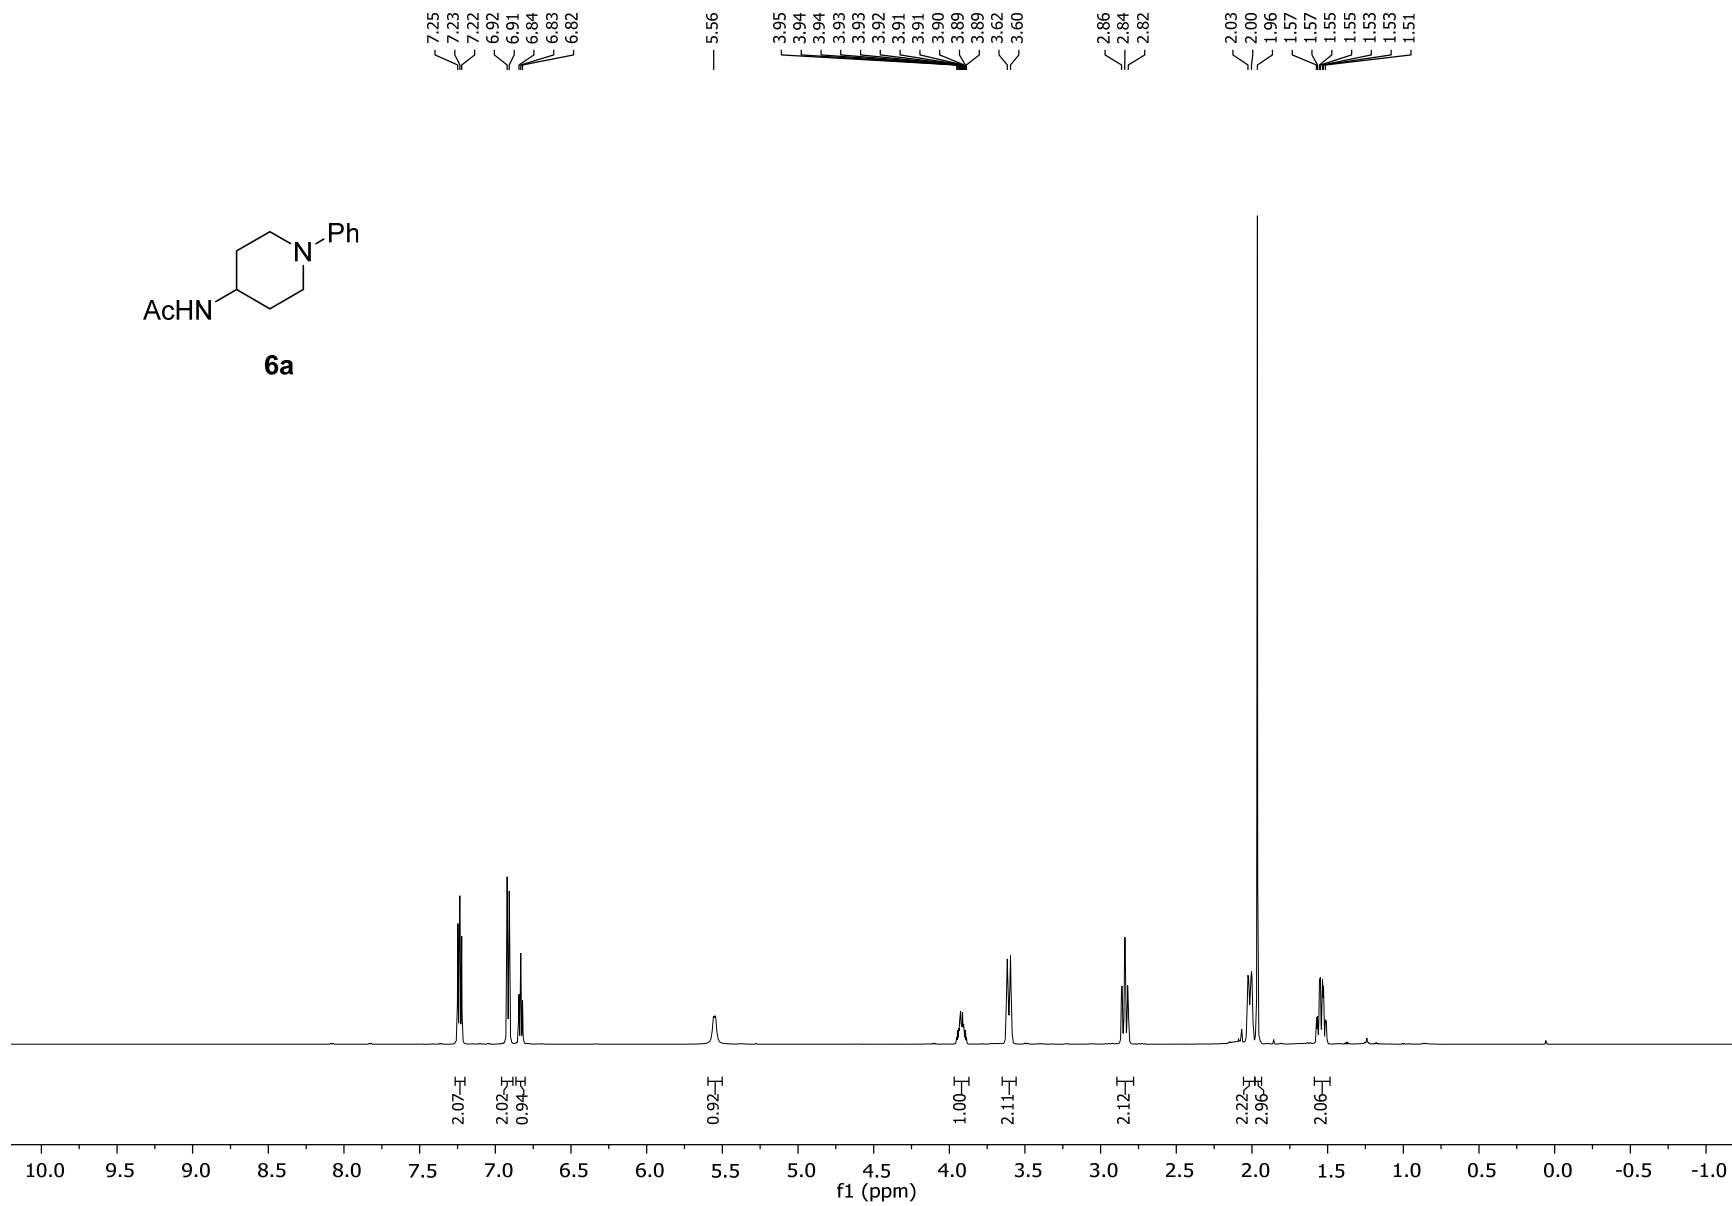

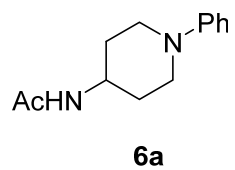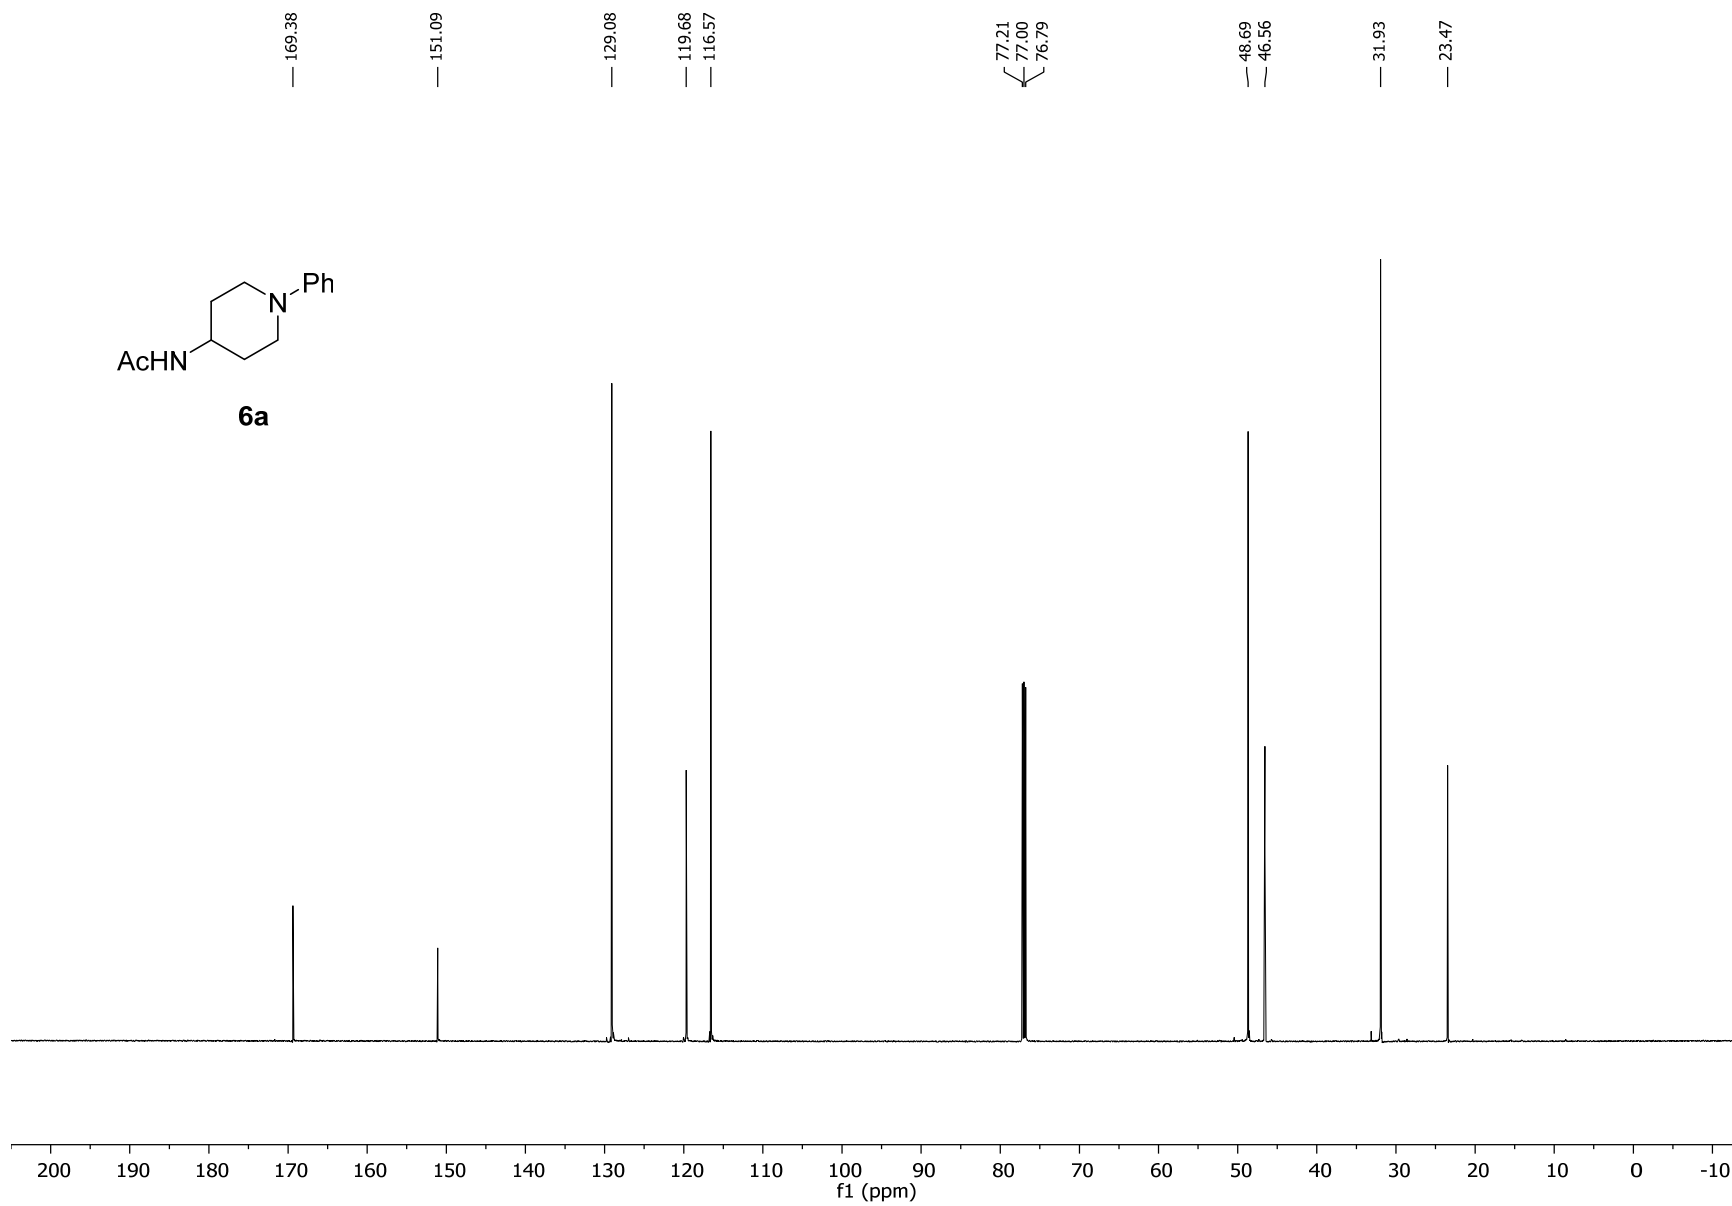

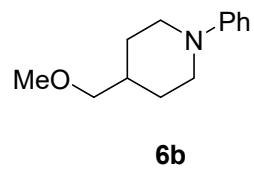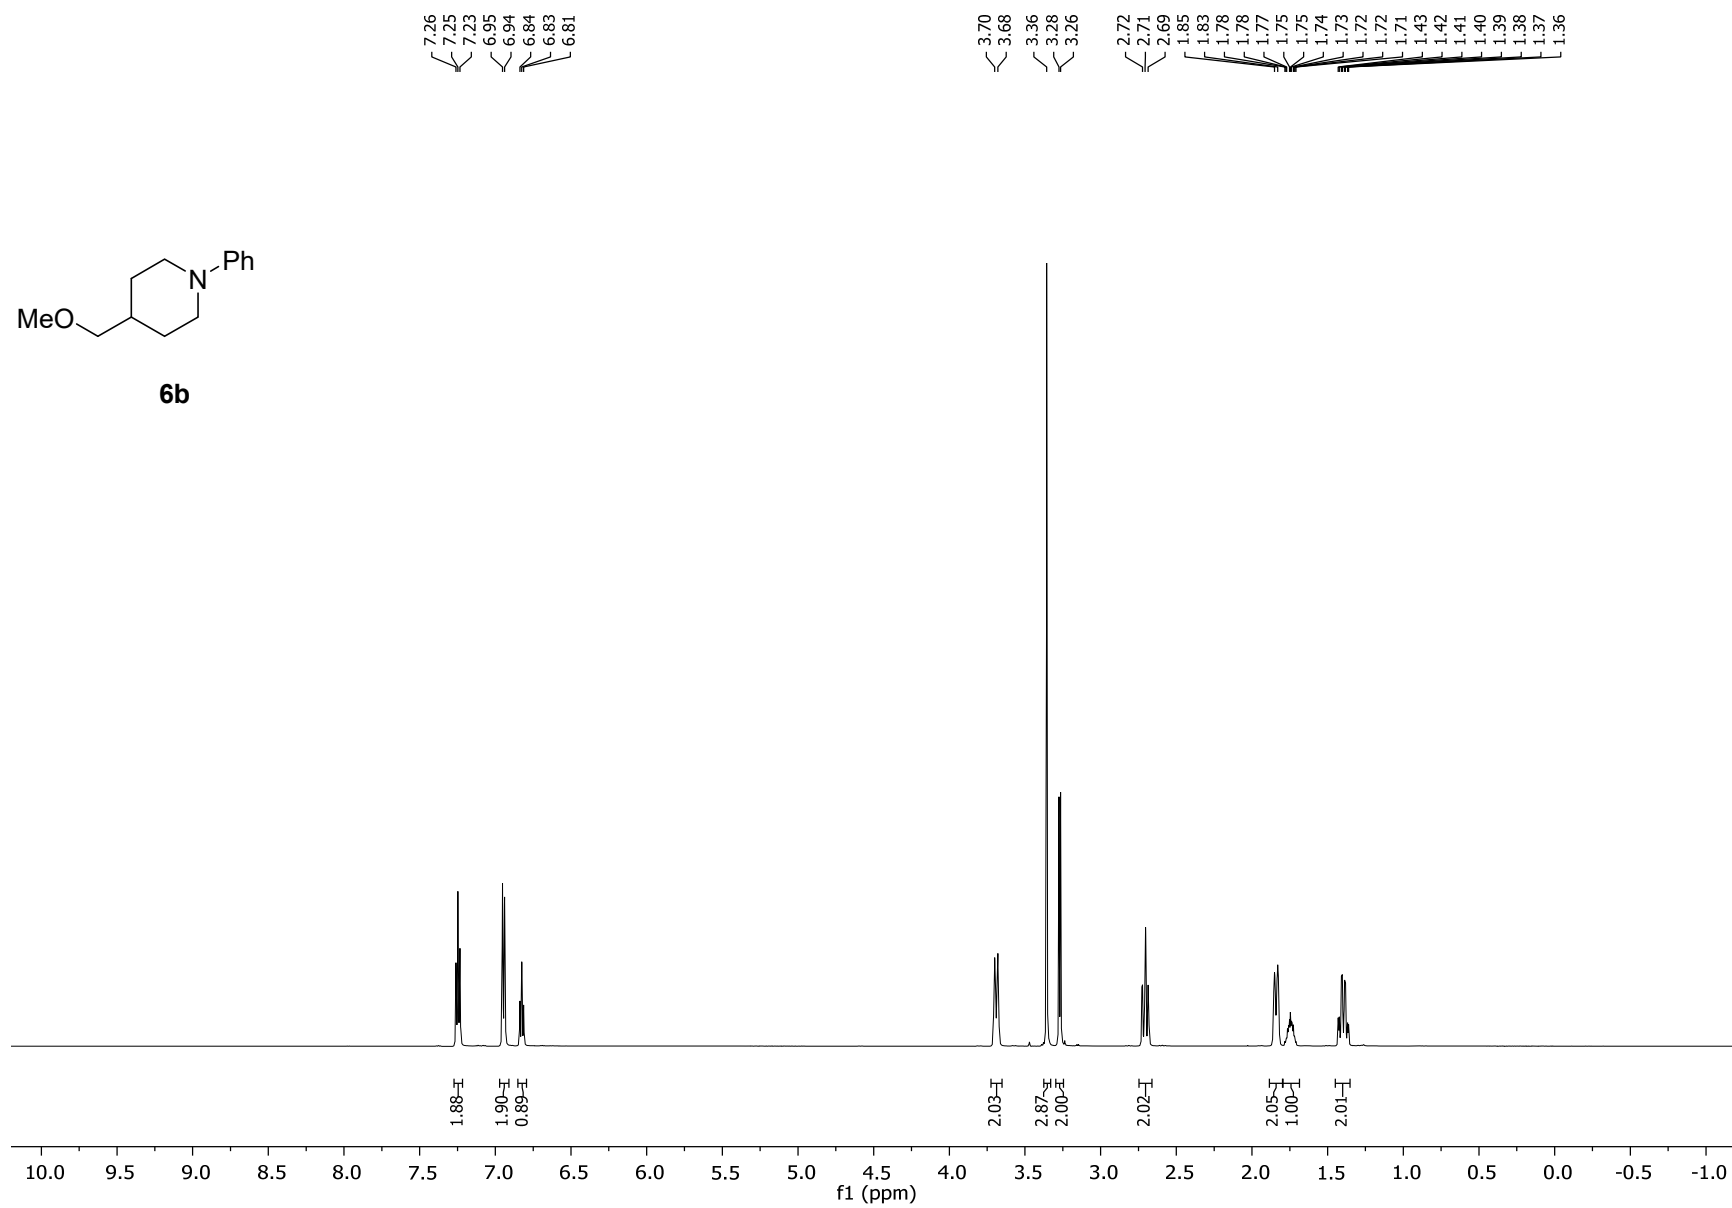

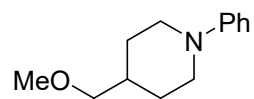

6b

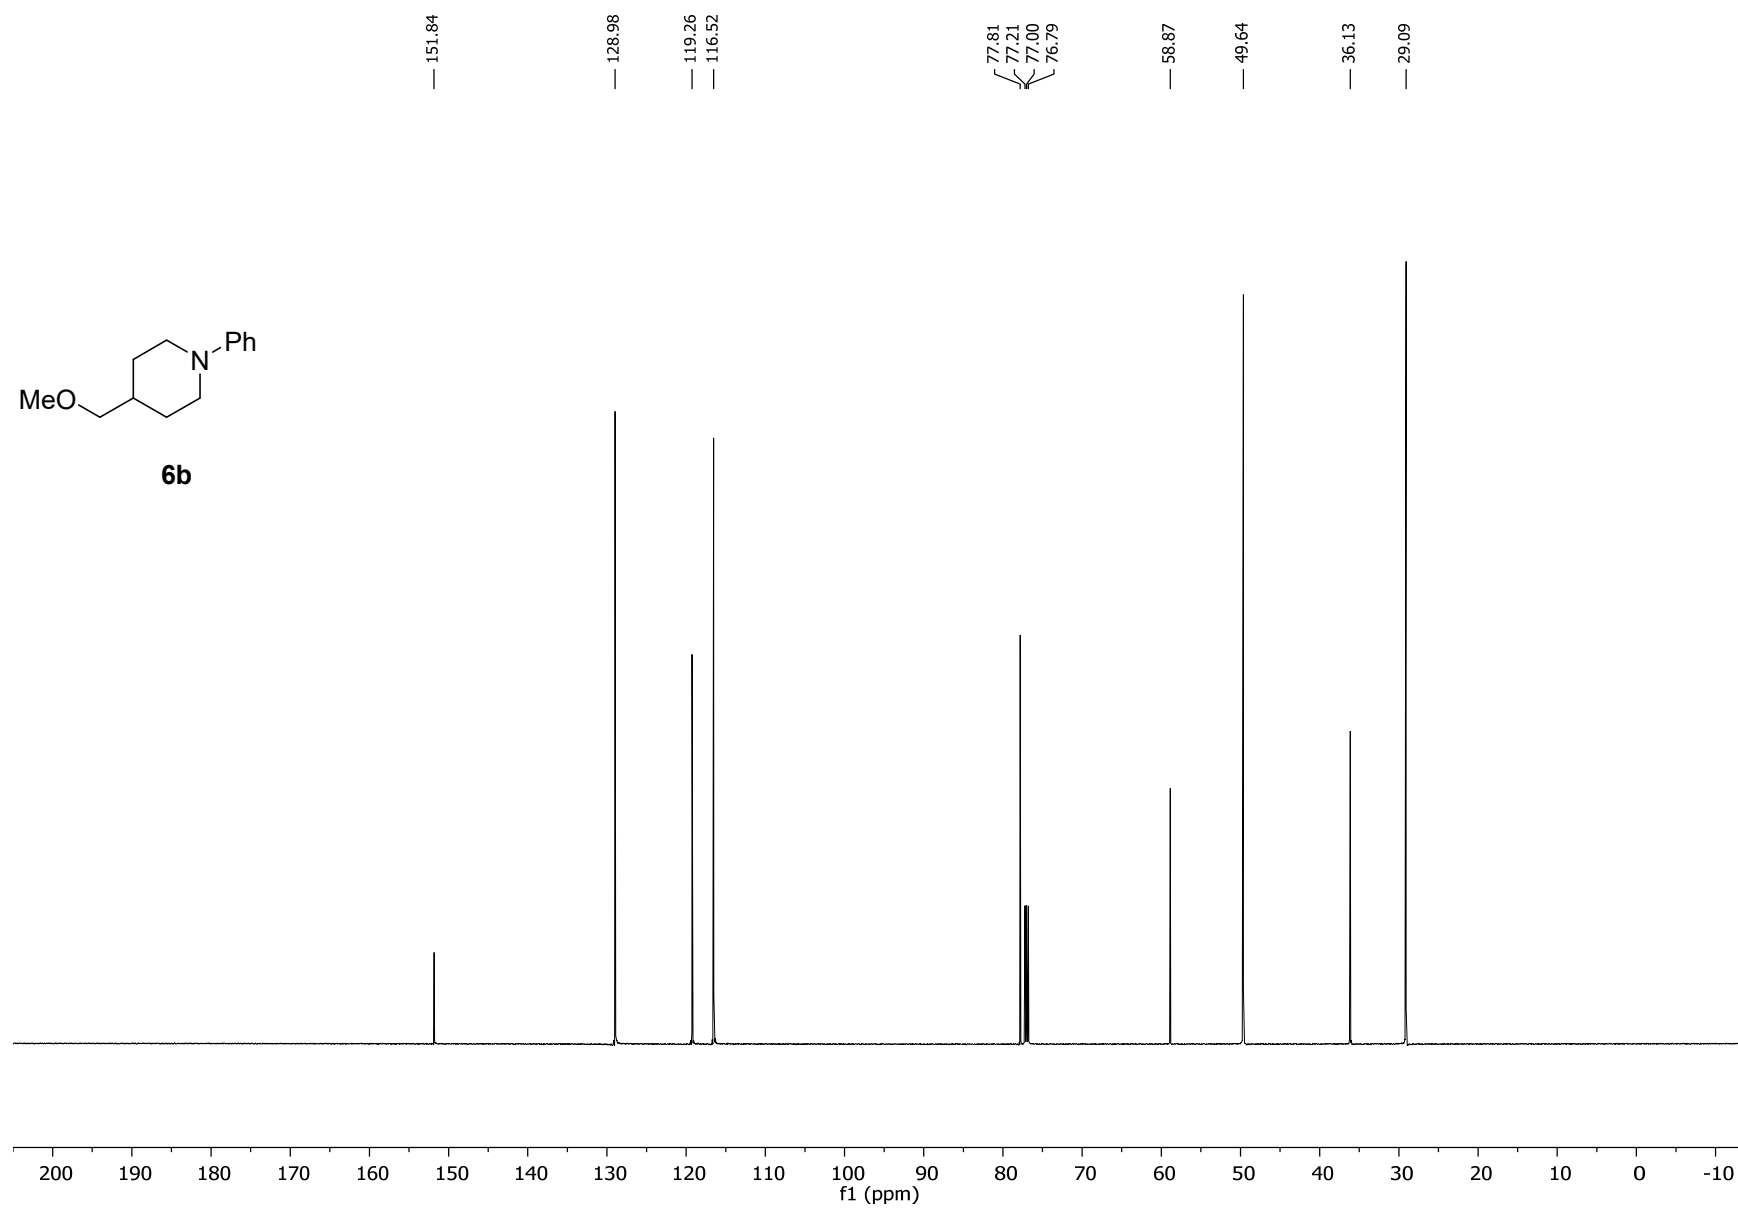

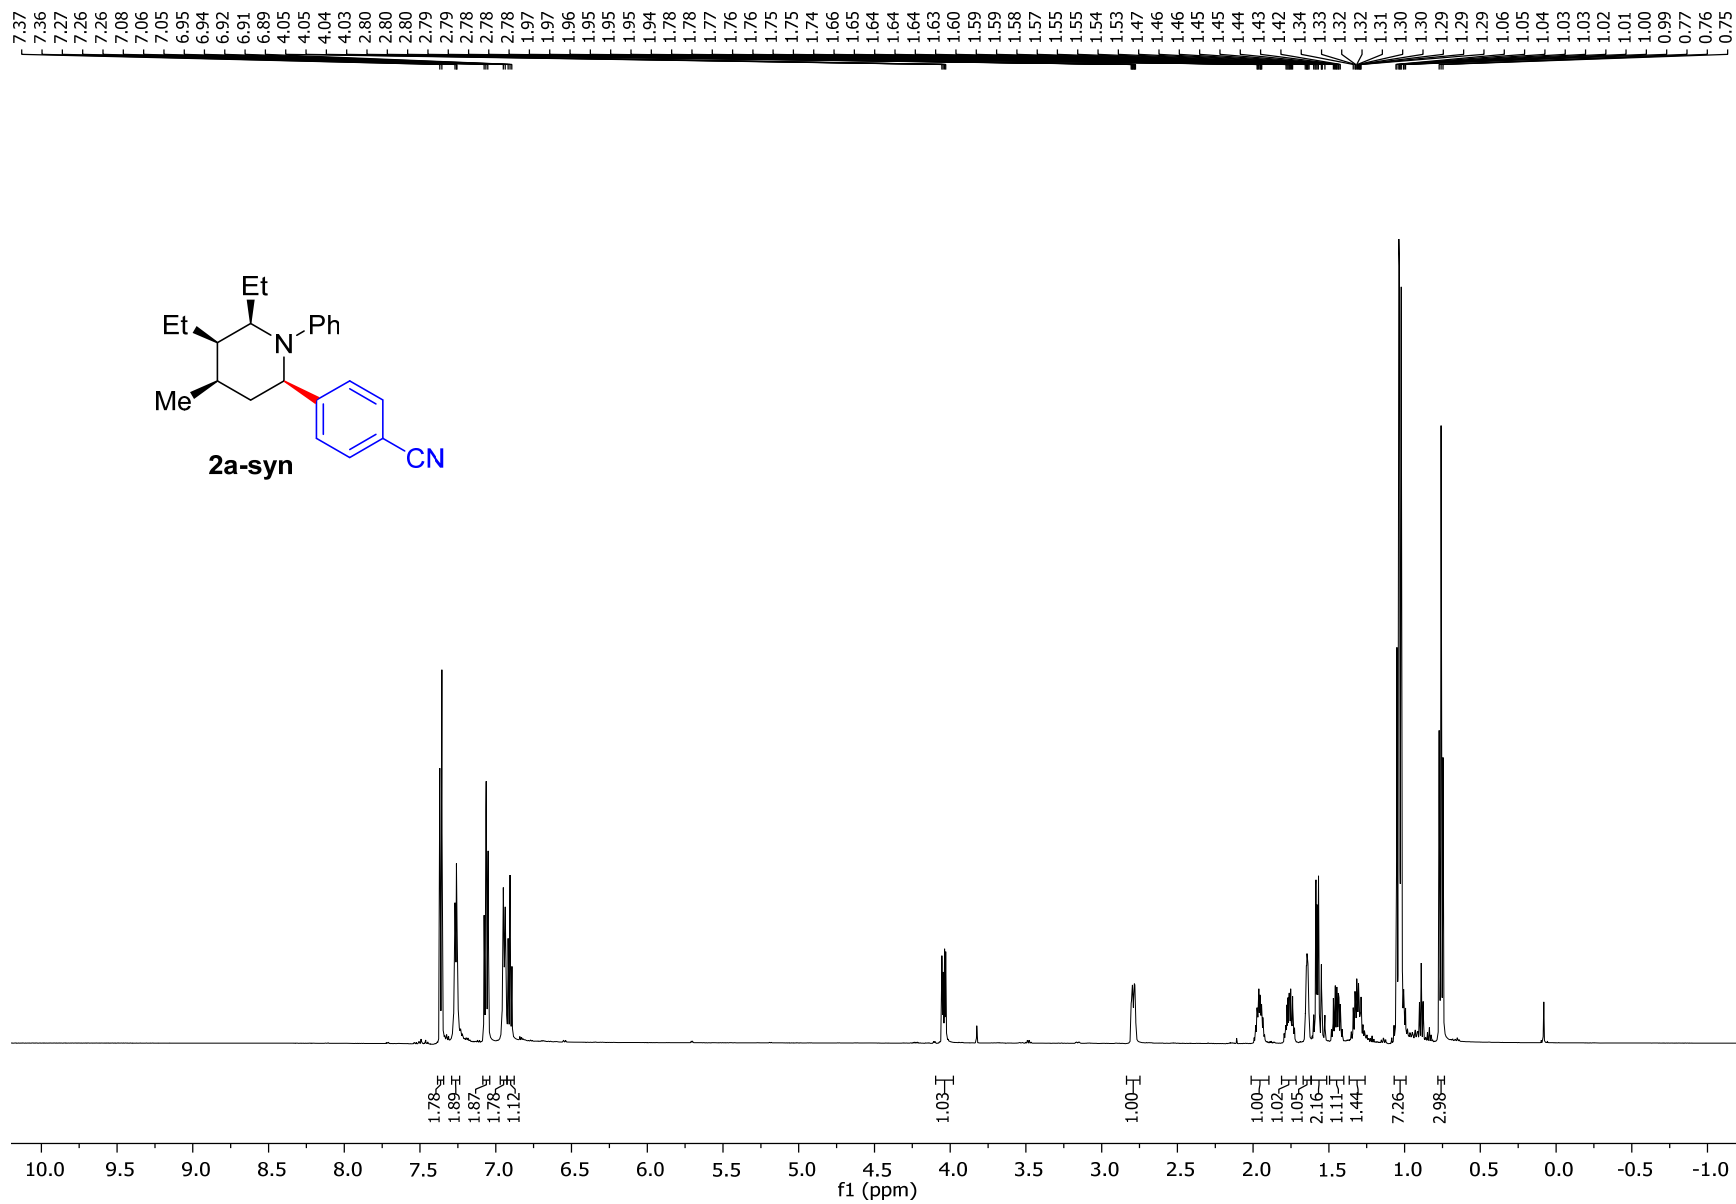

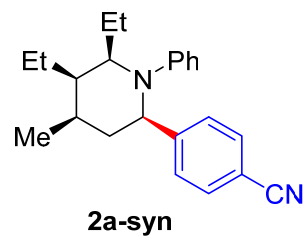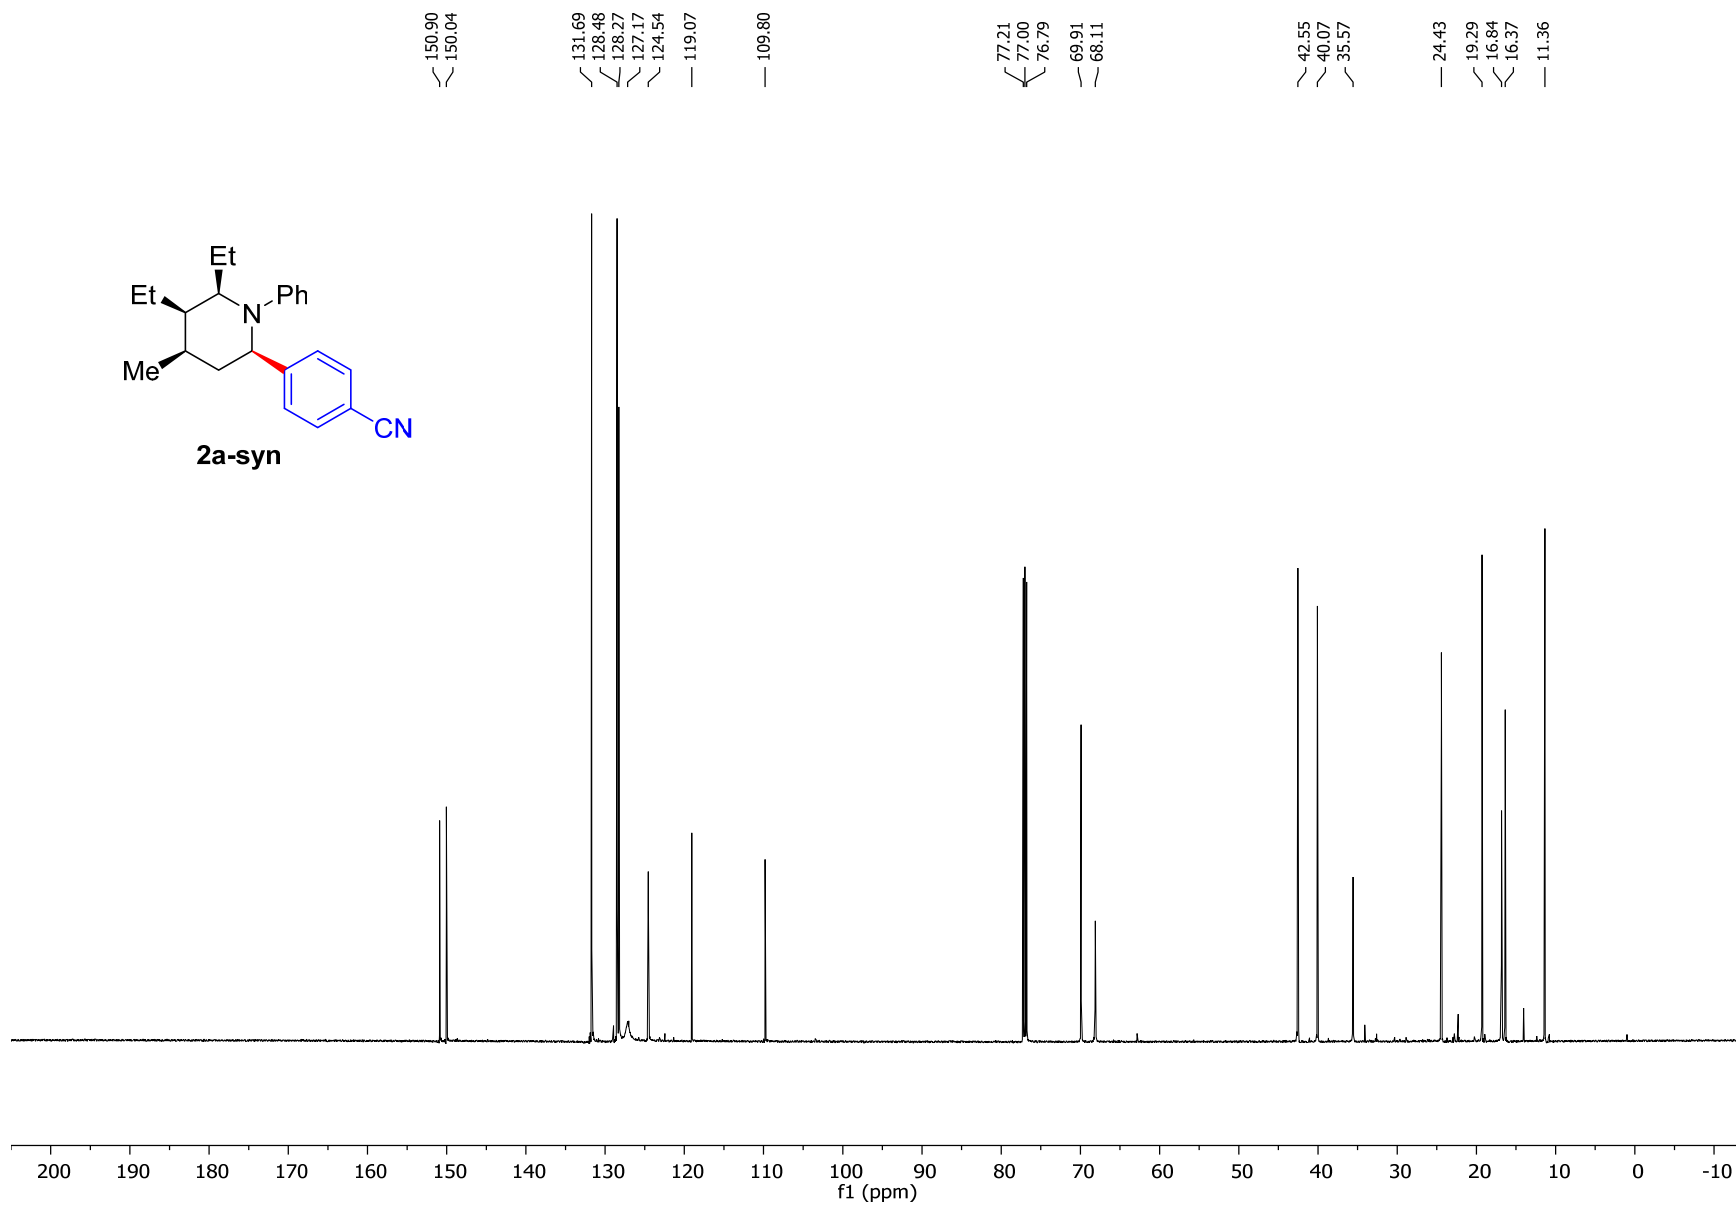

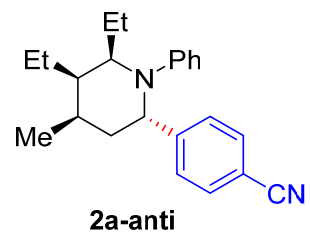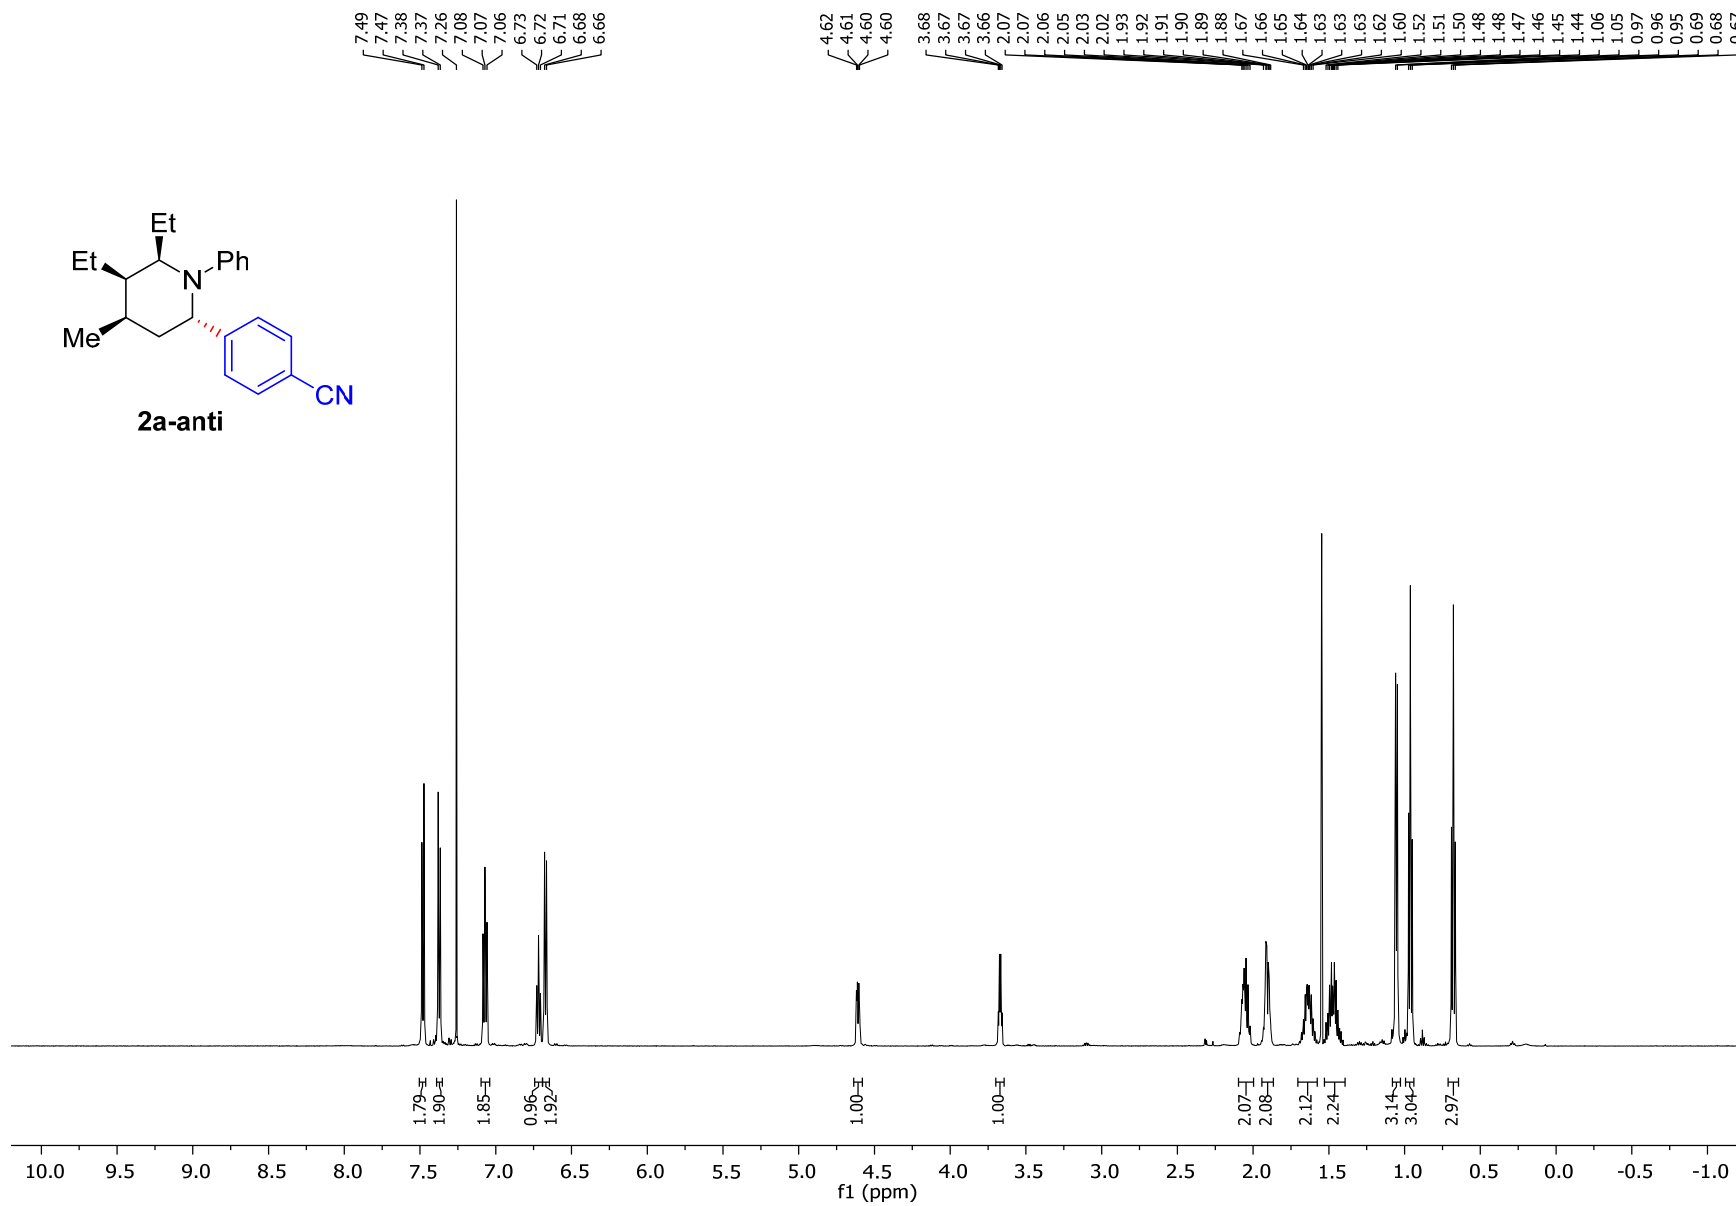

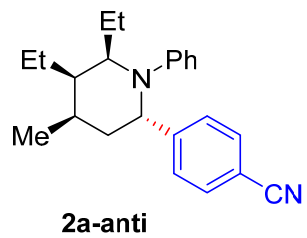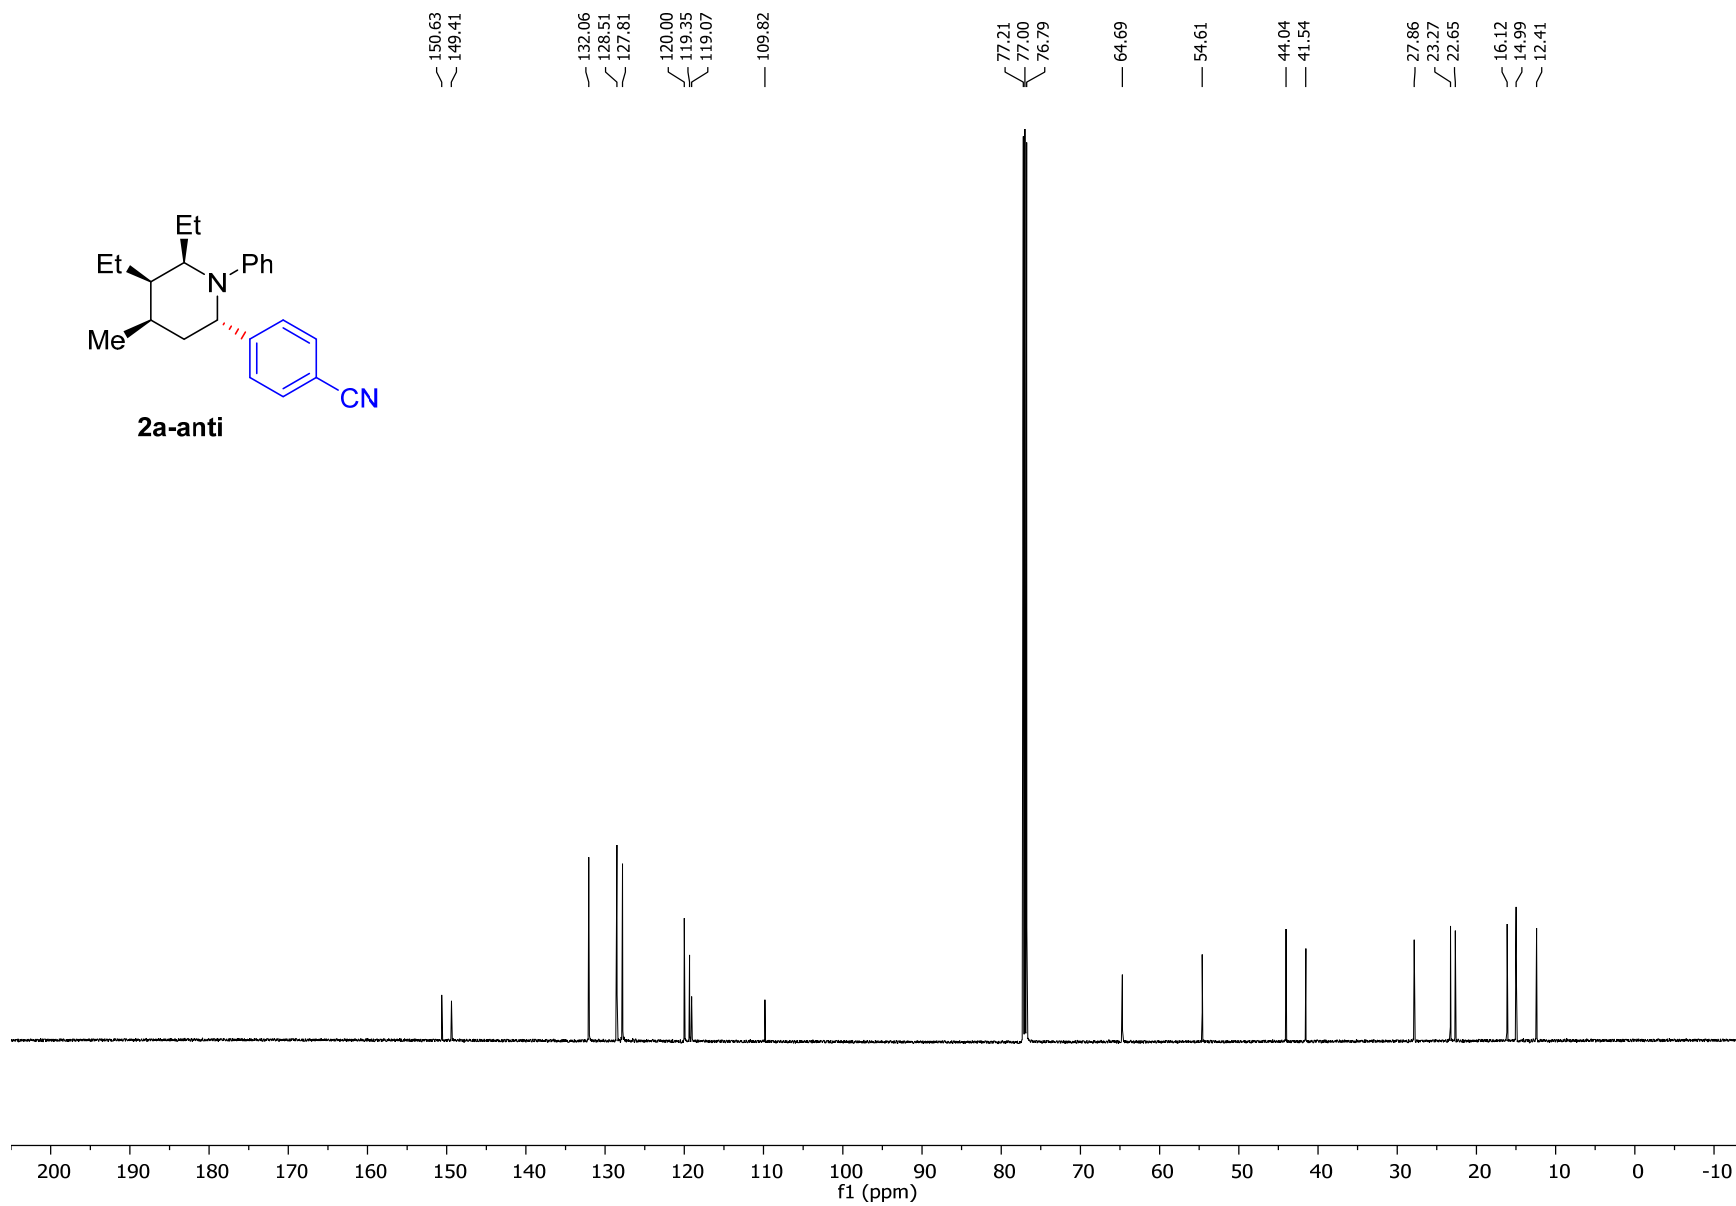



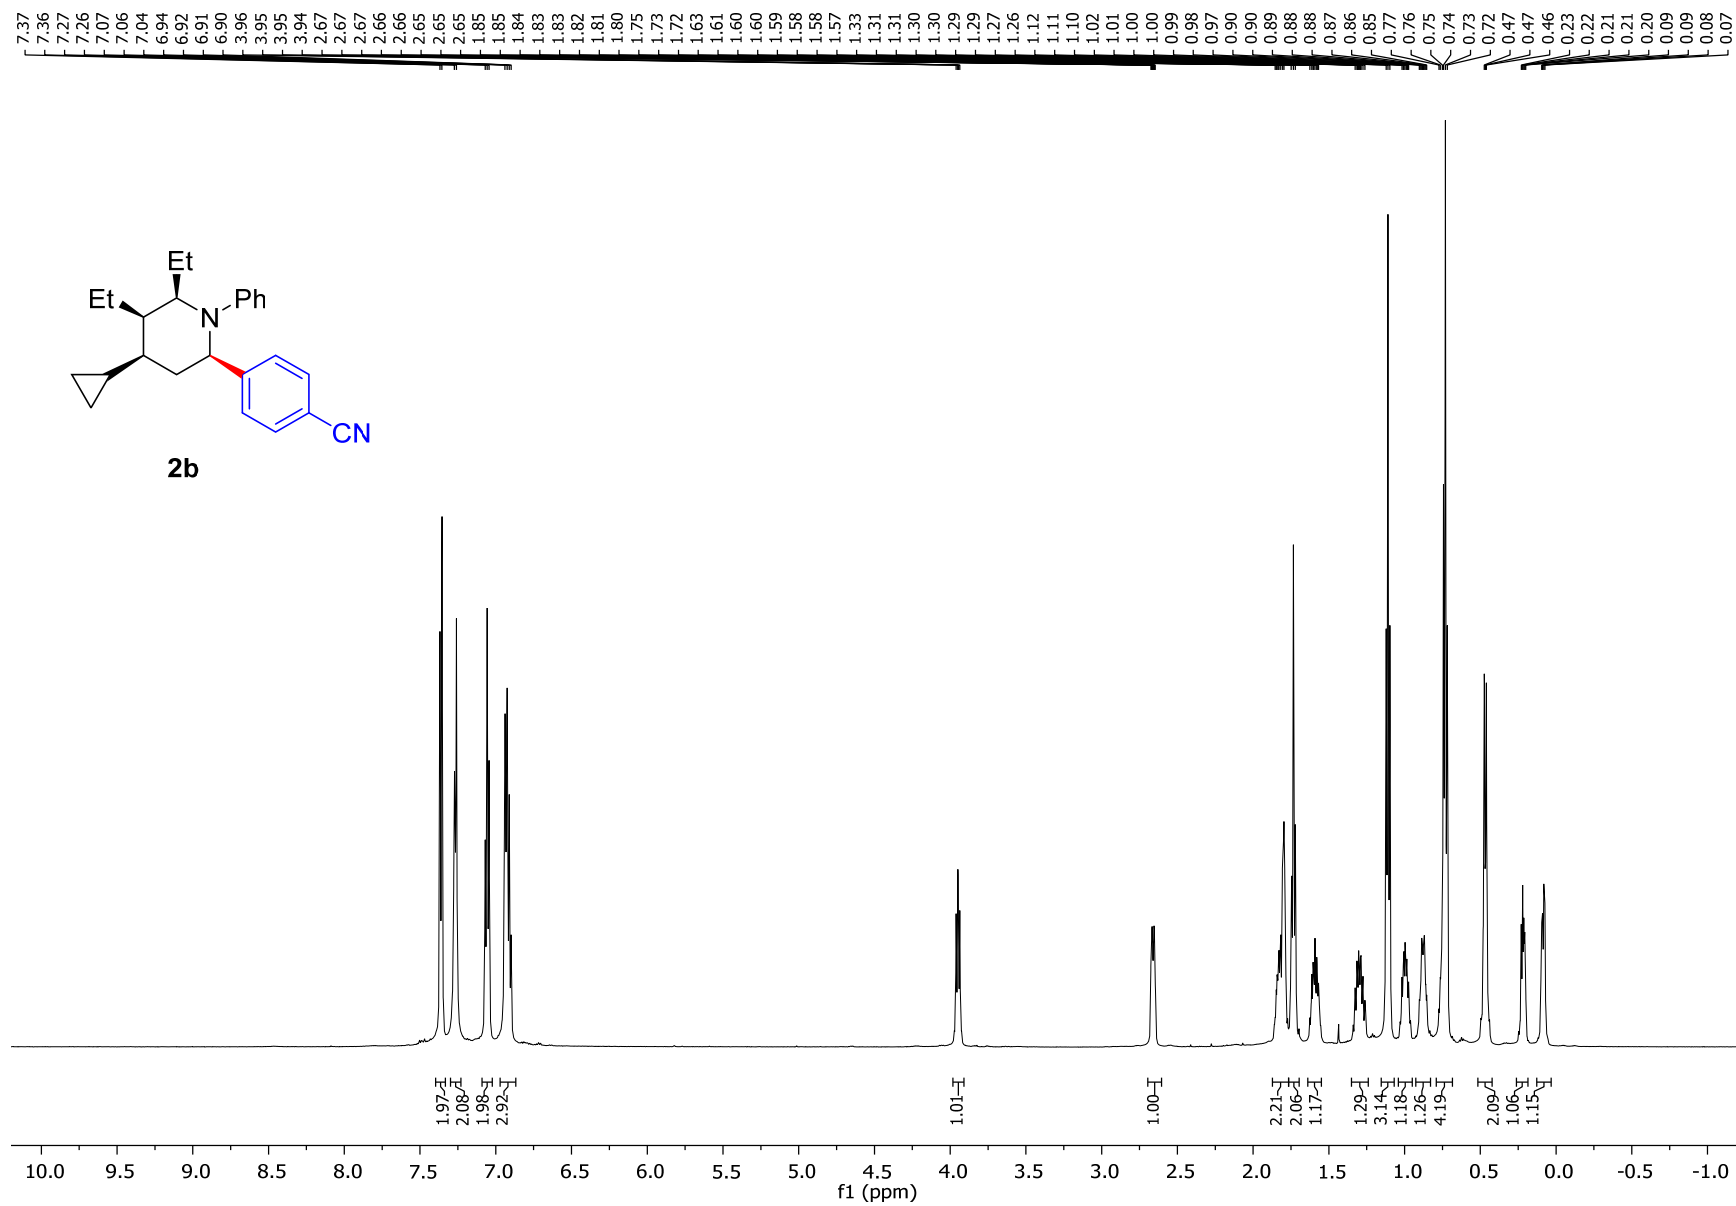

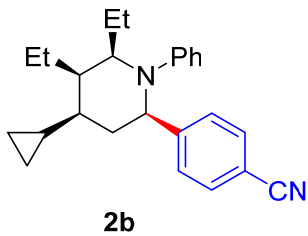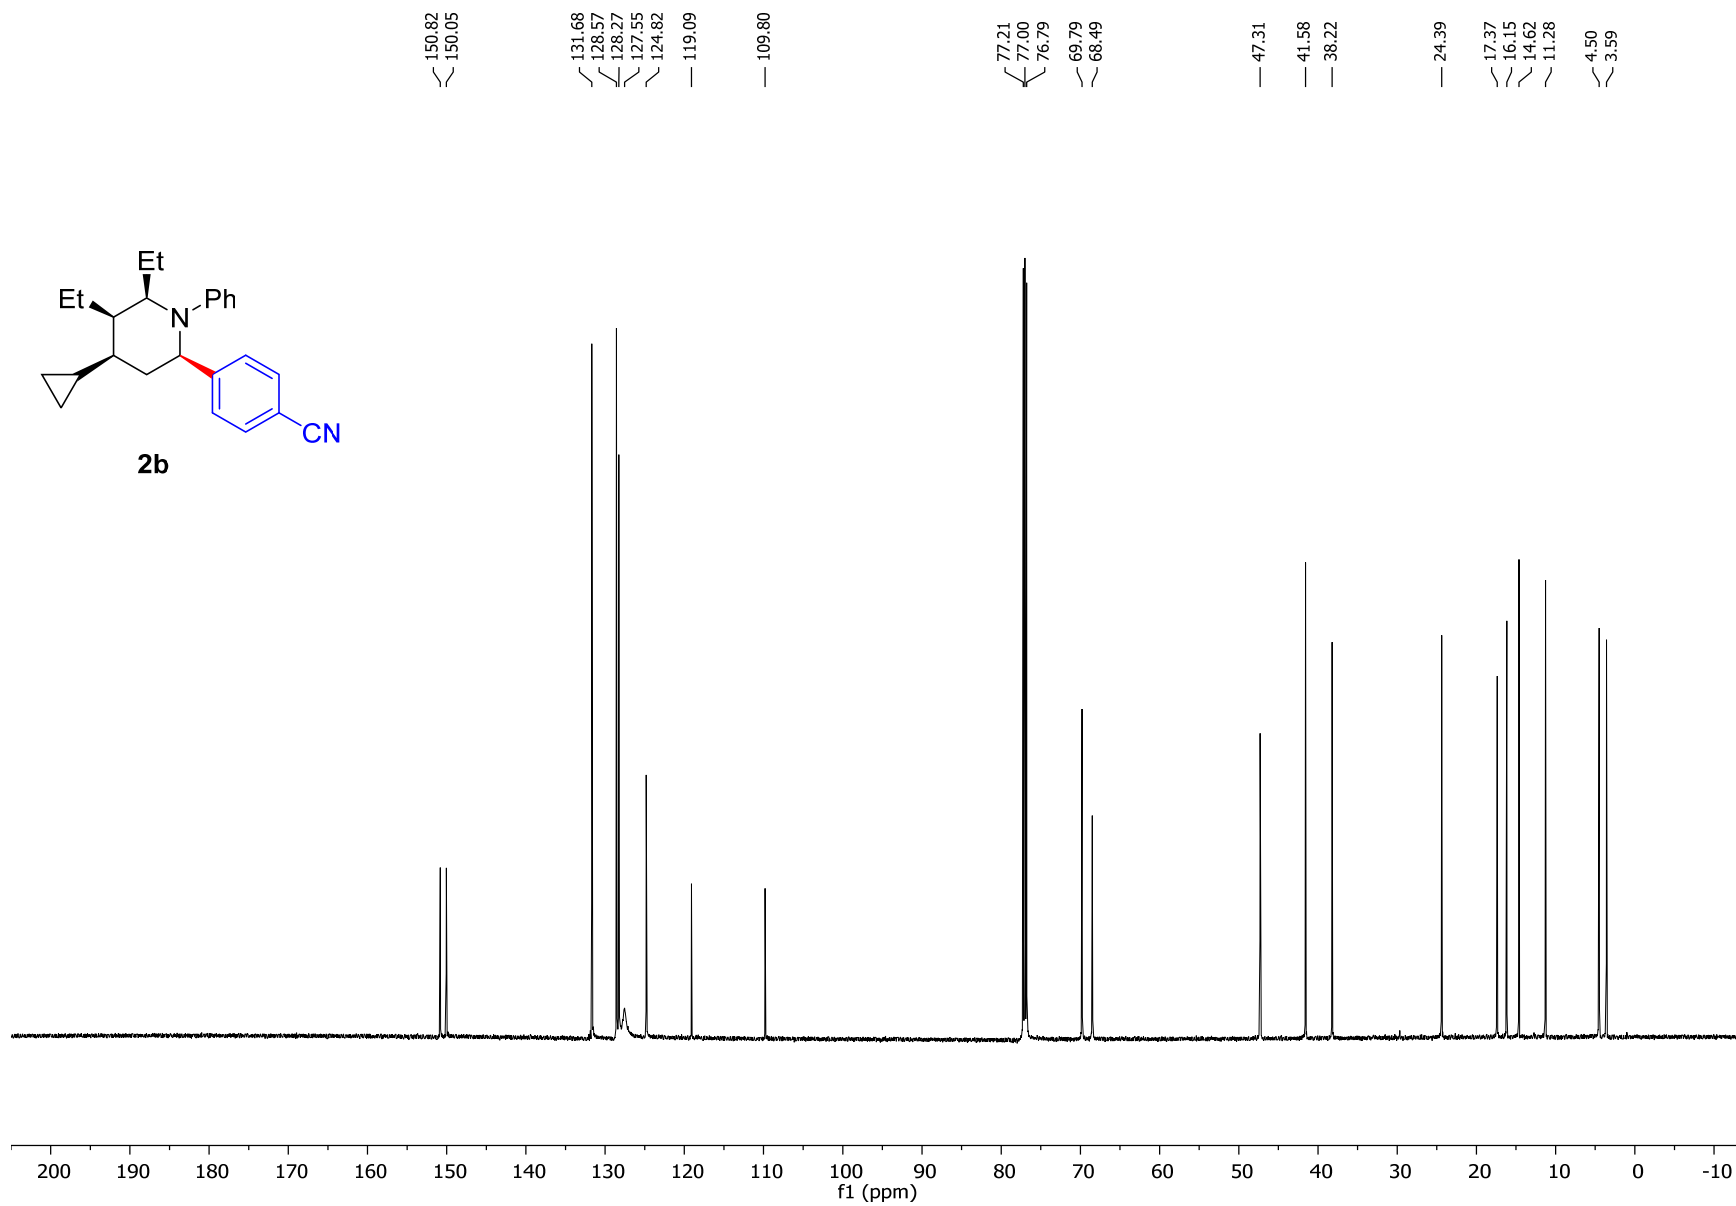

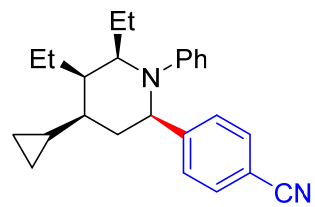

**2b**  
crude  $^1\text{H}$  NMR  
 $\text{CDCl}_3$   
500 MHz

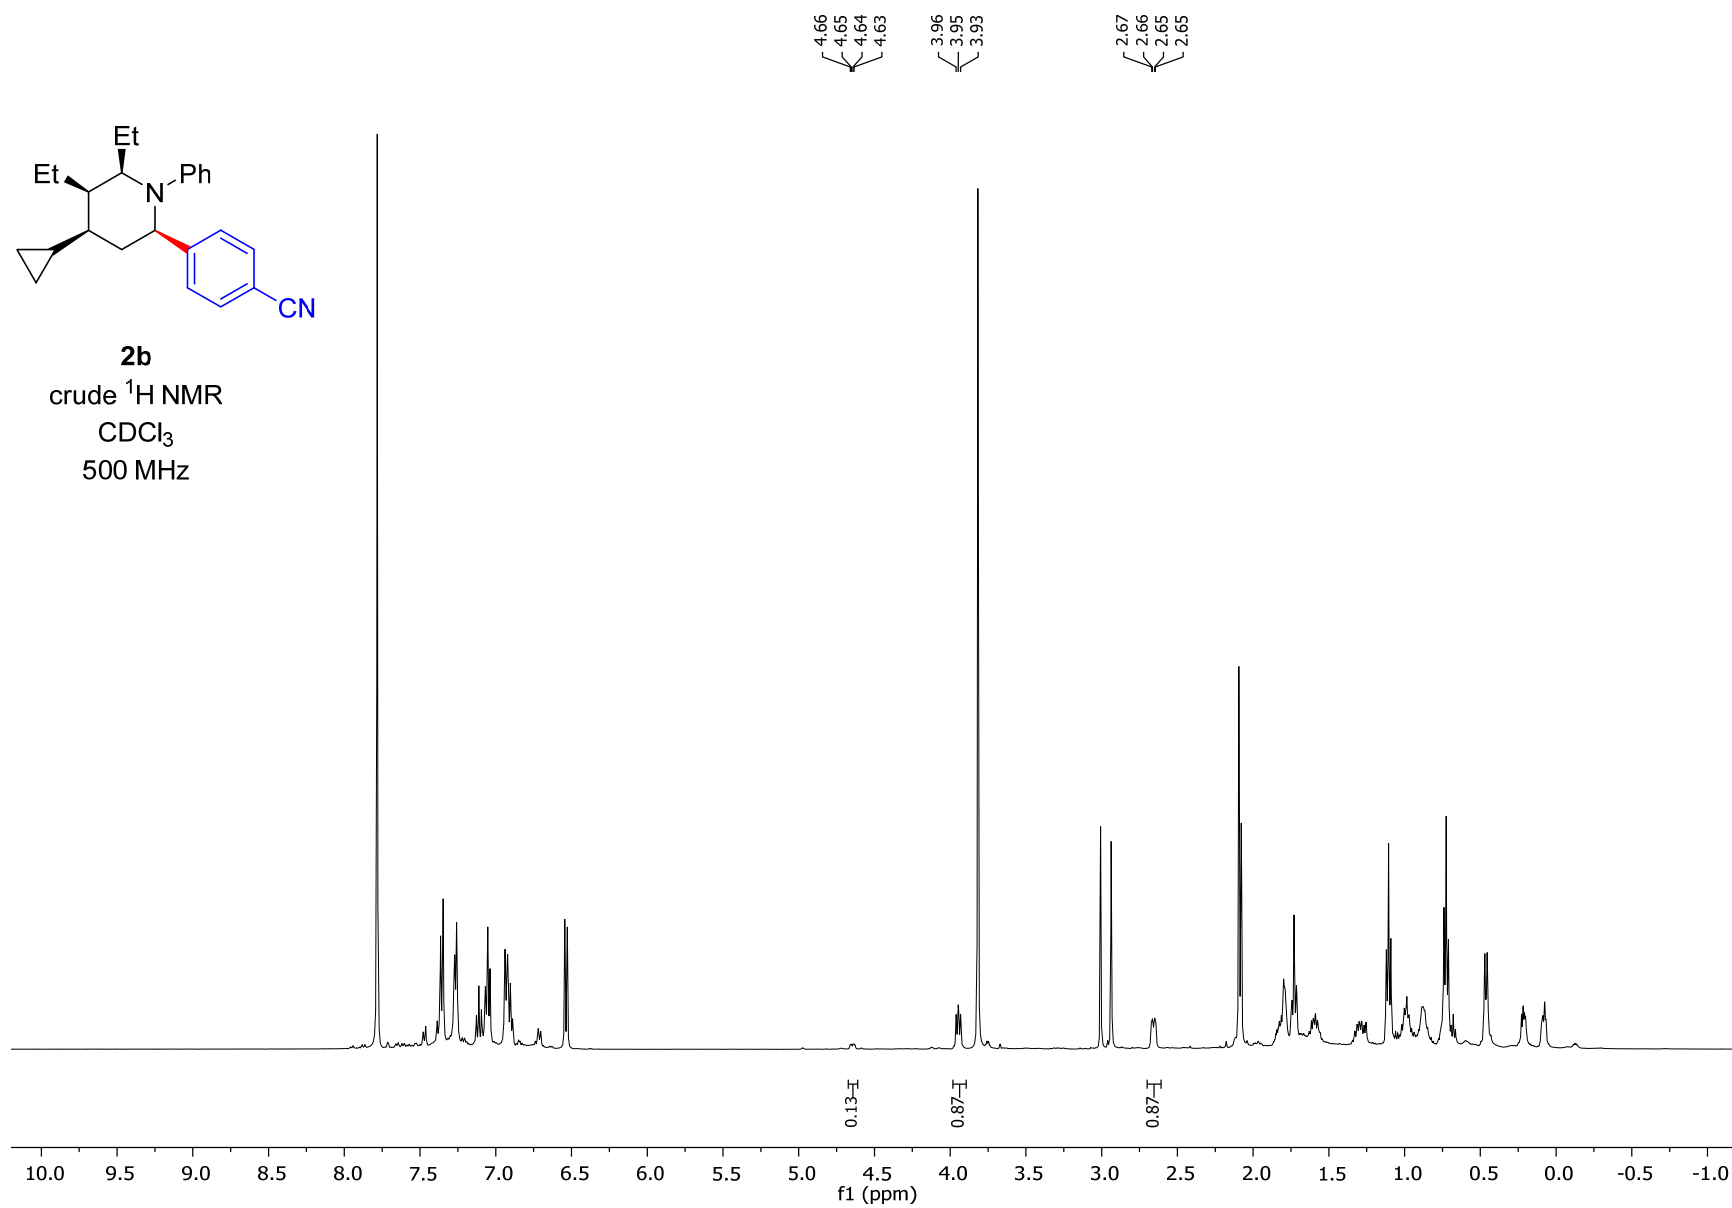

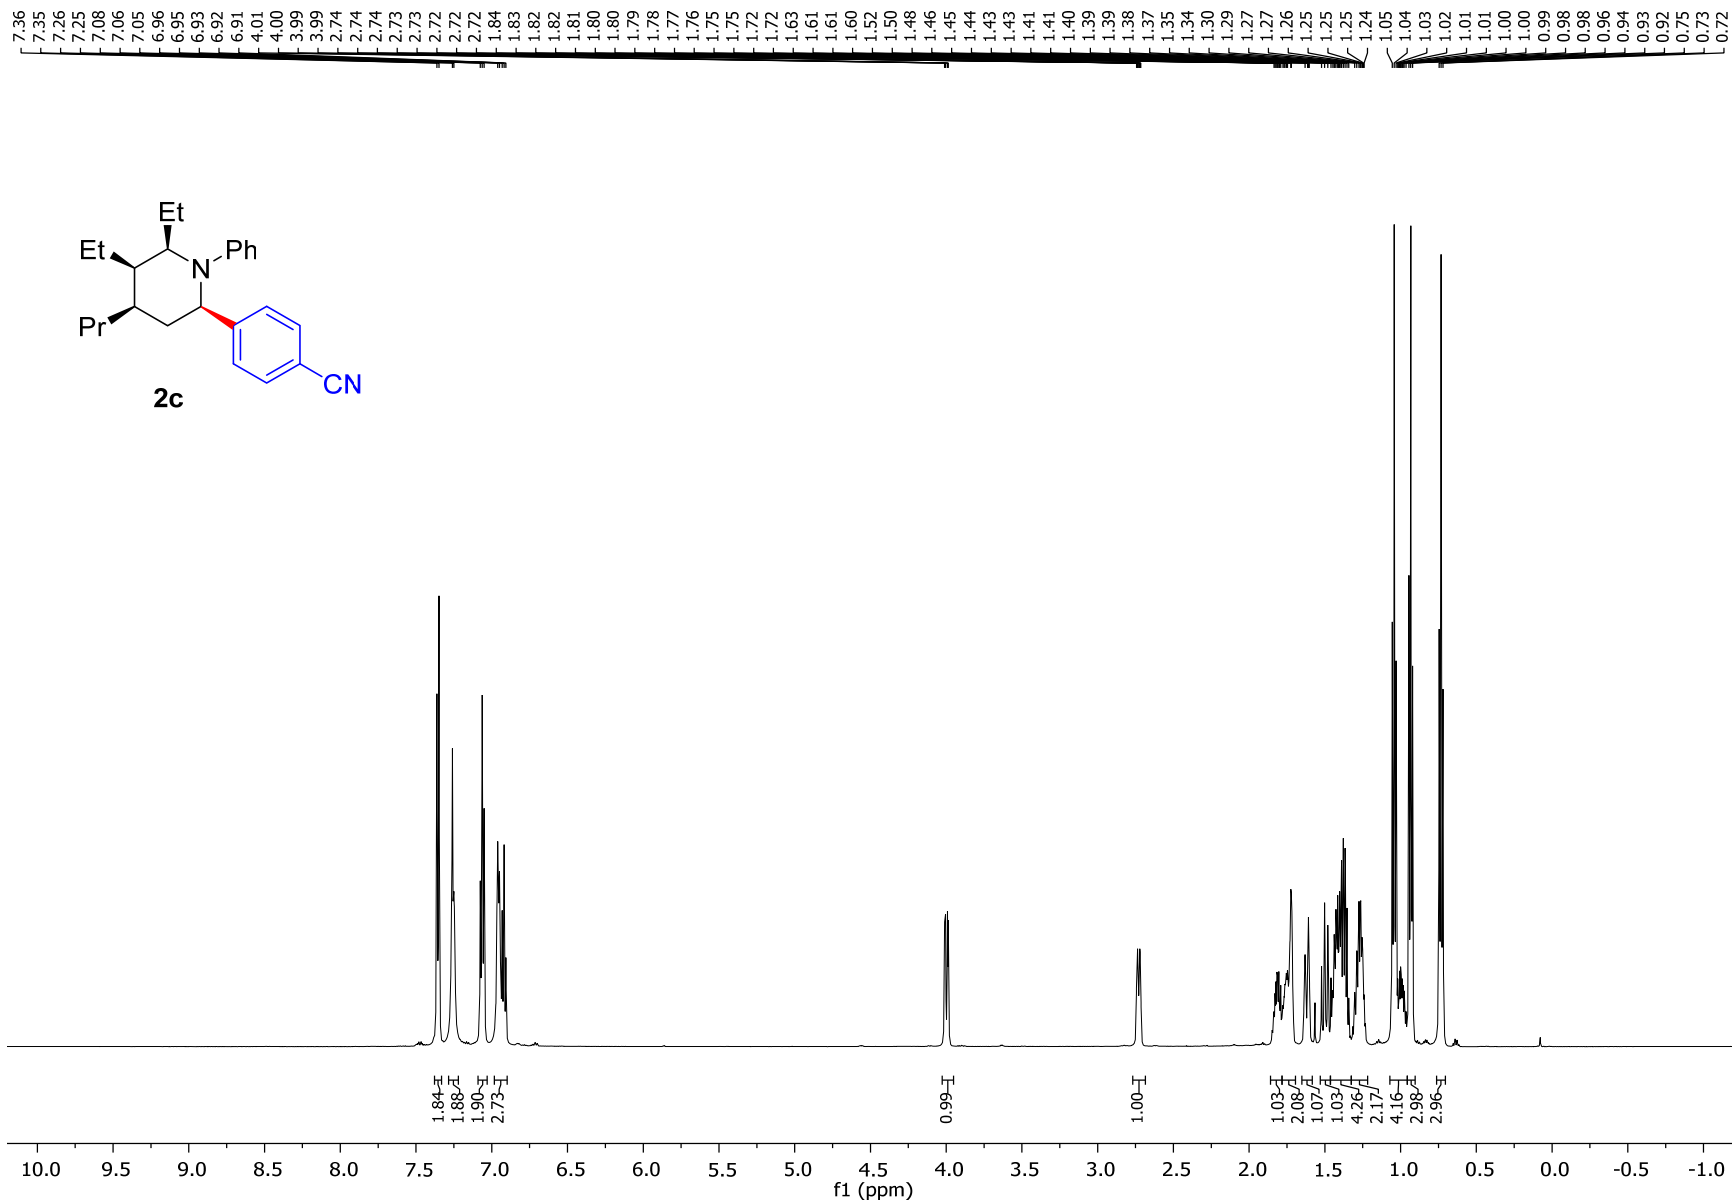

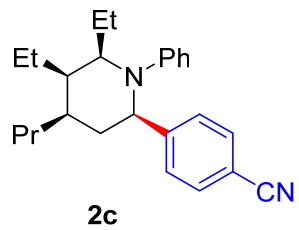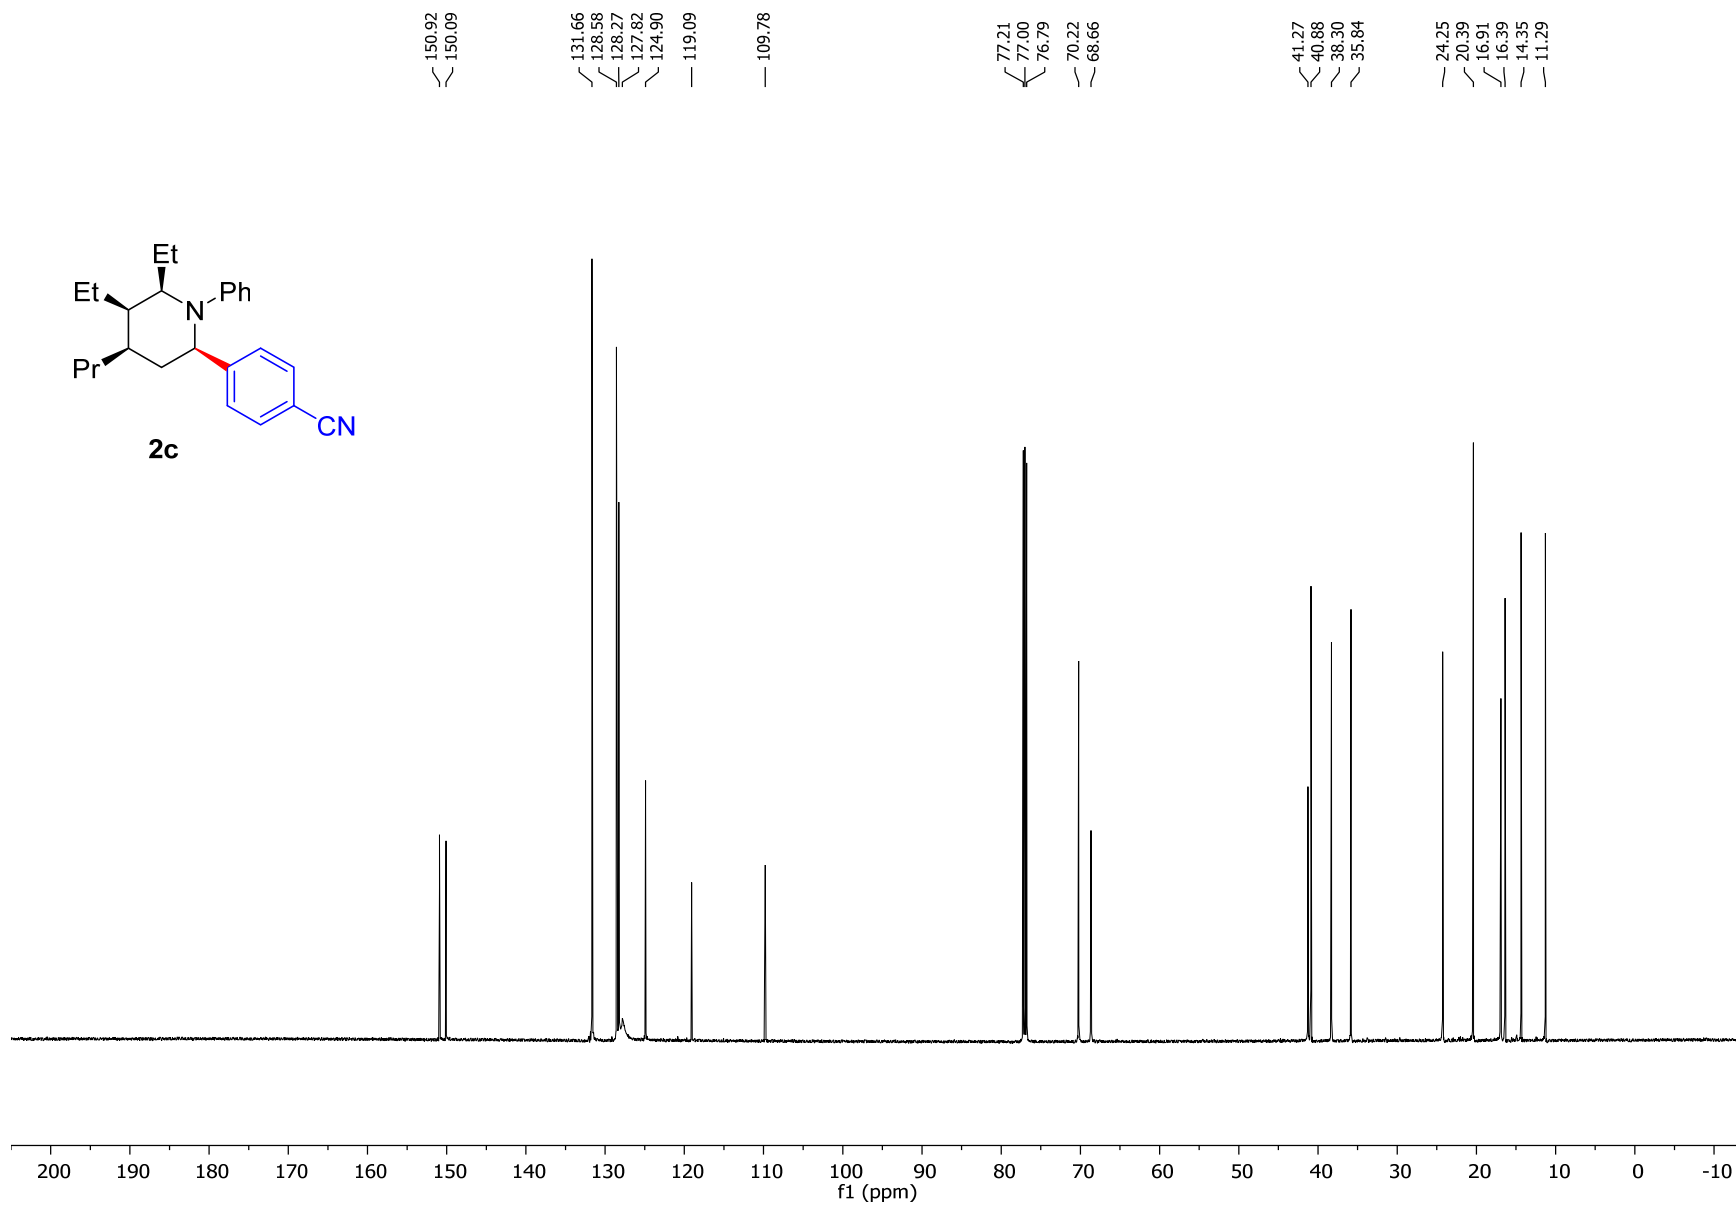

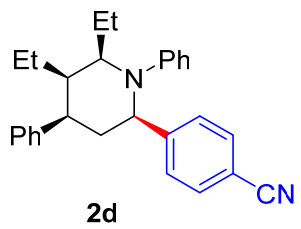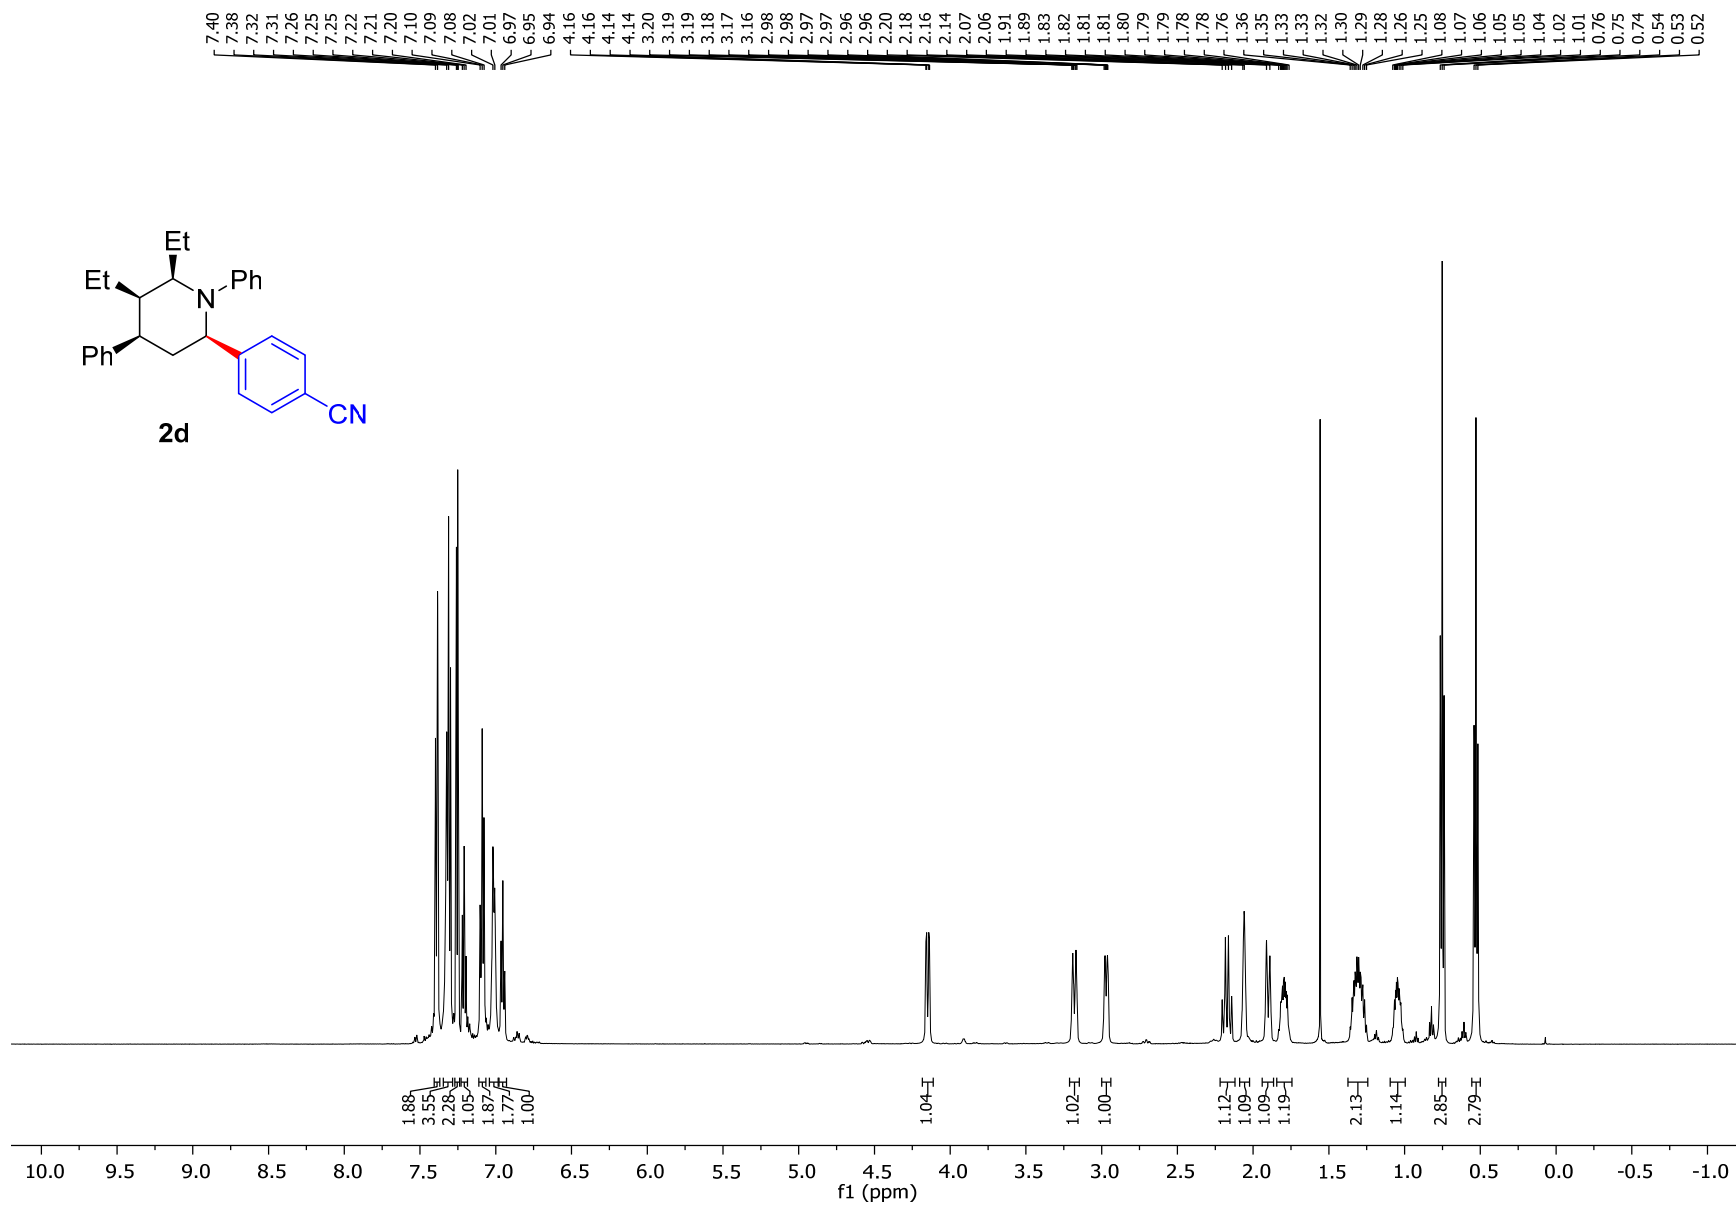

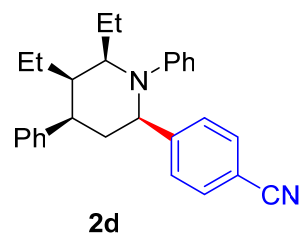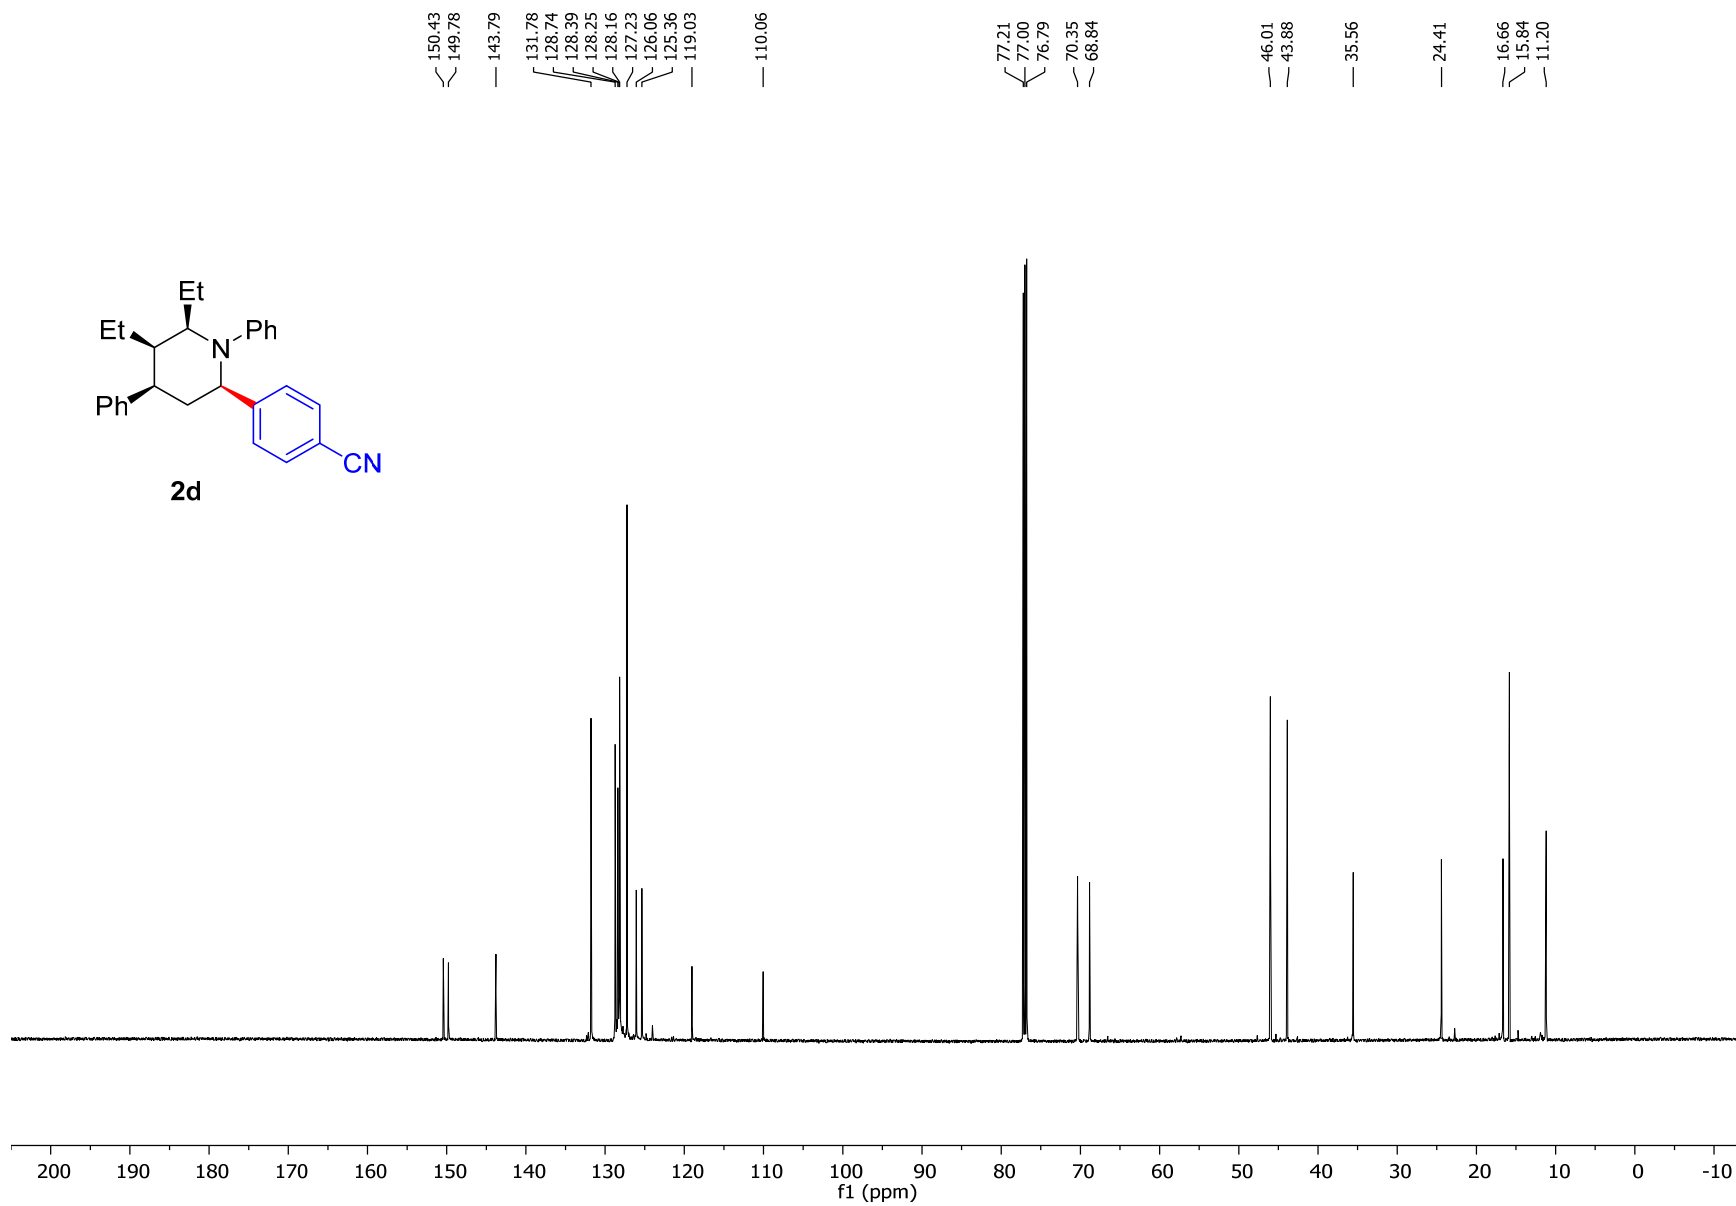

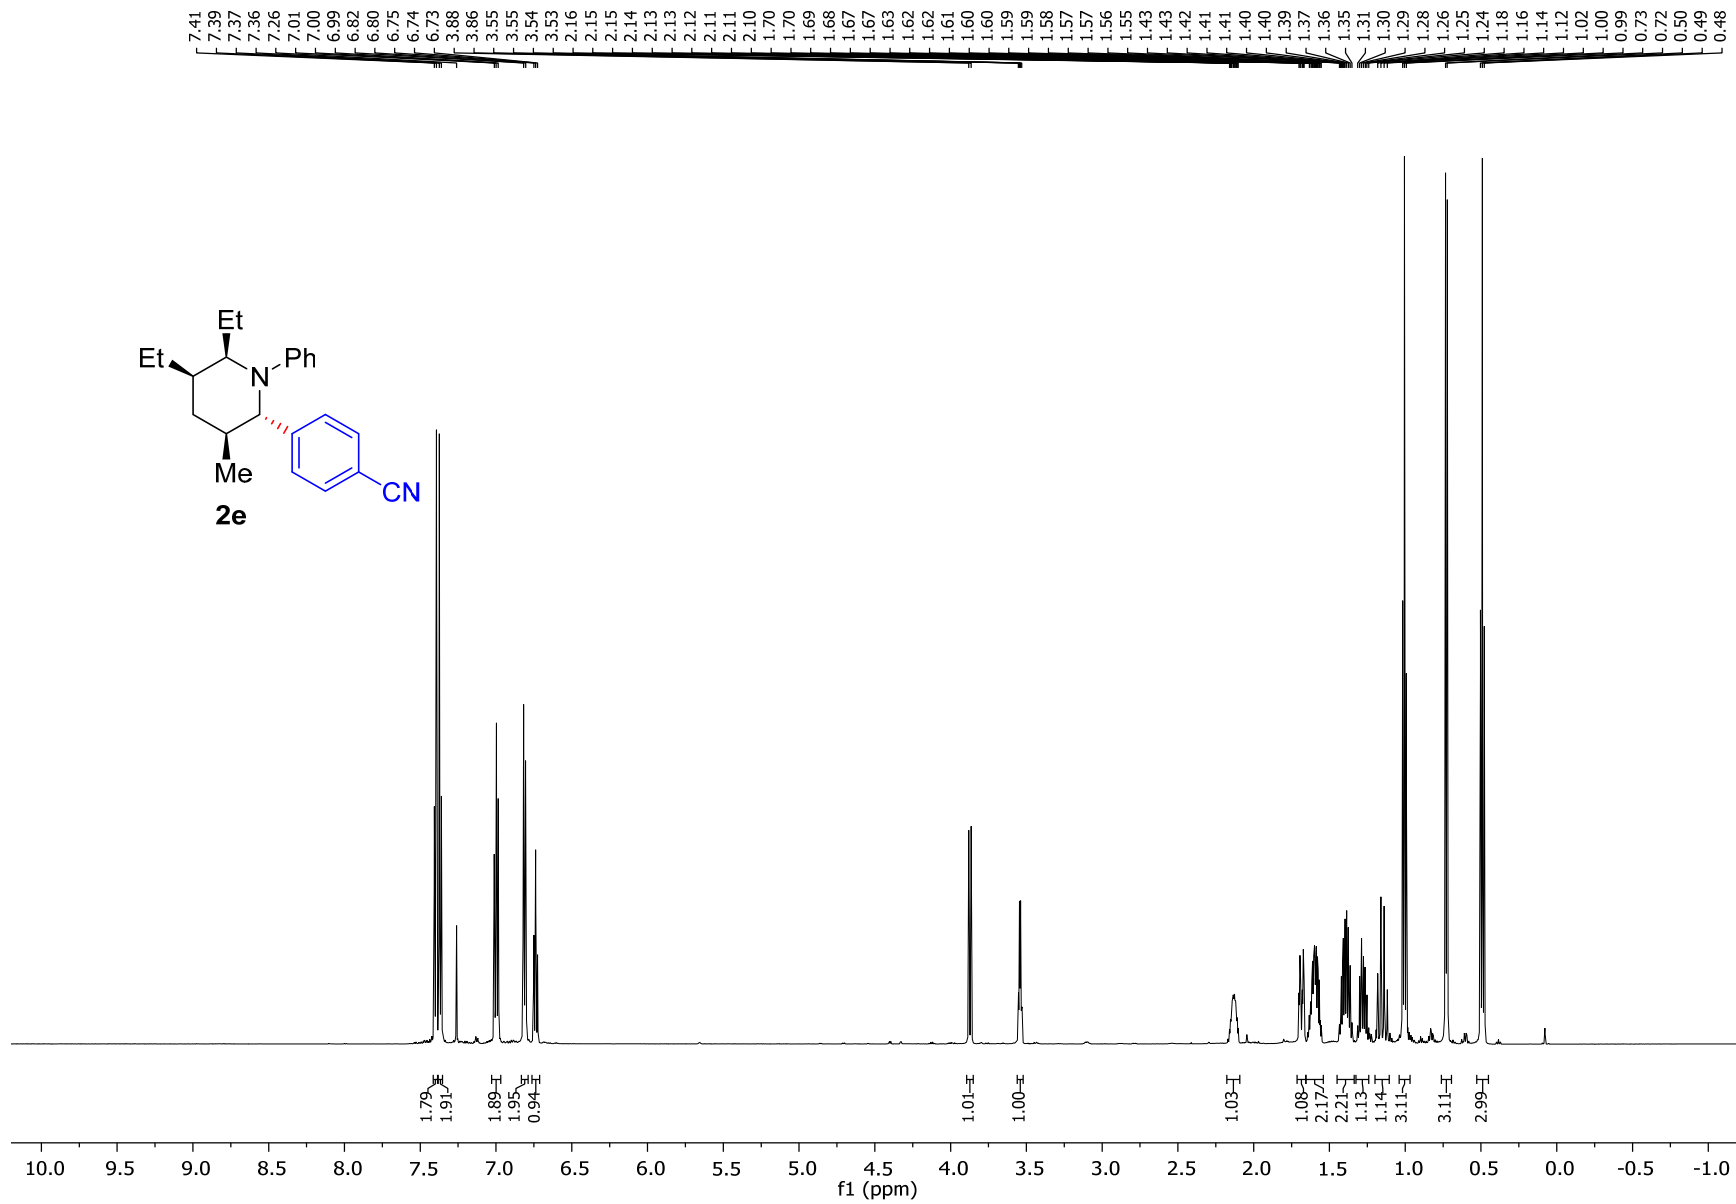



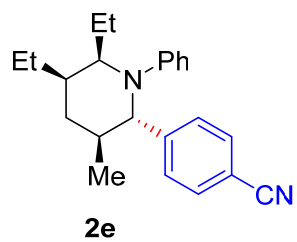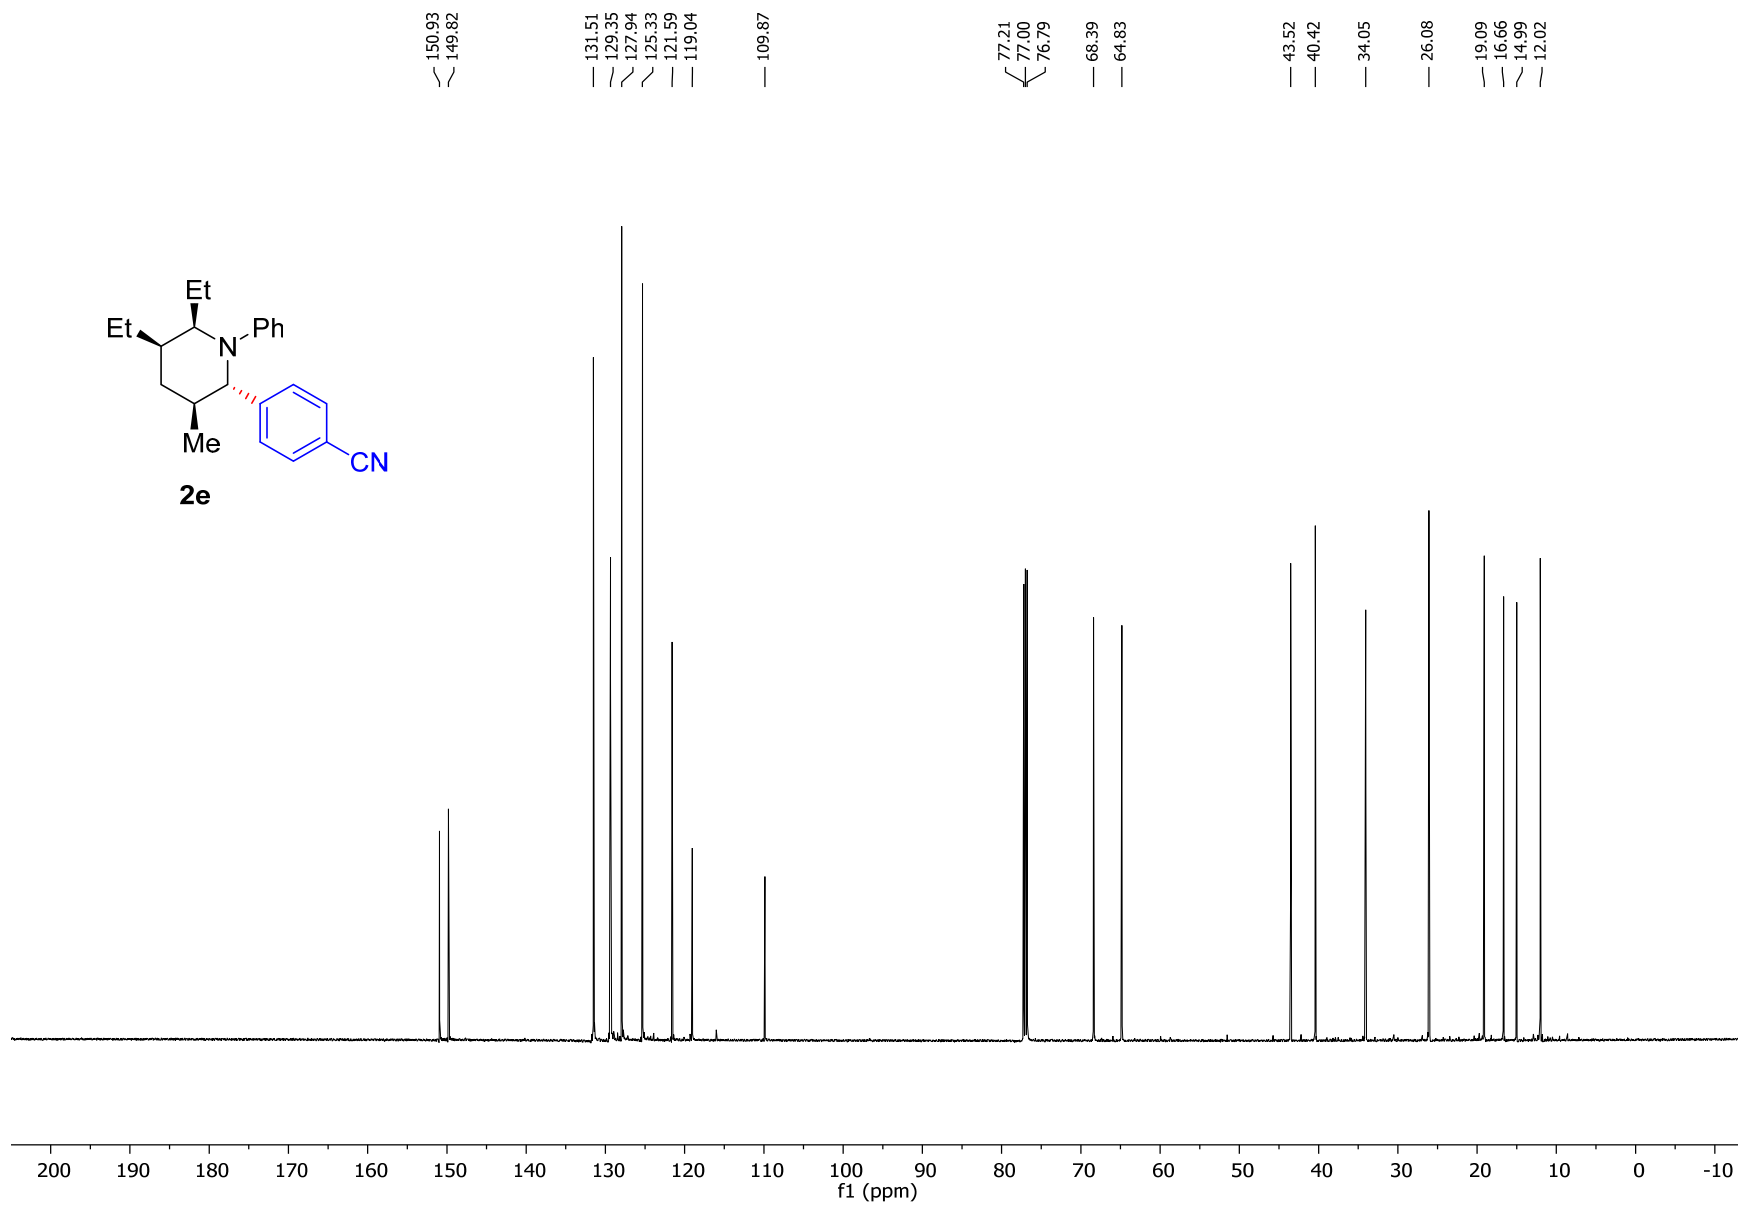

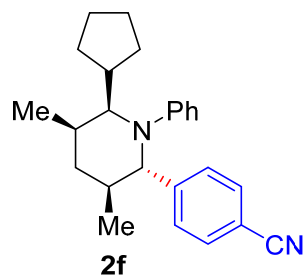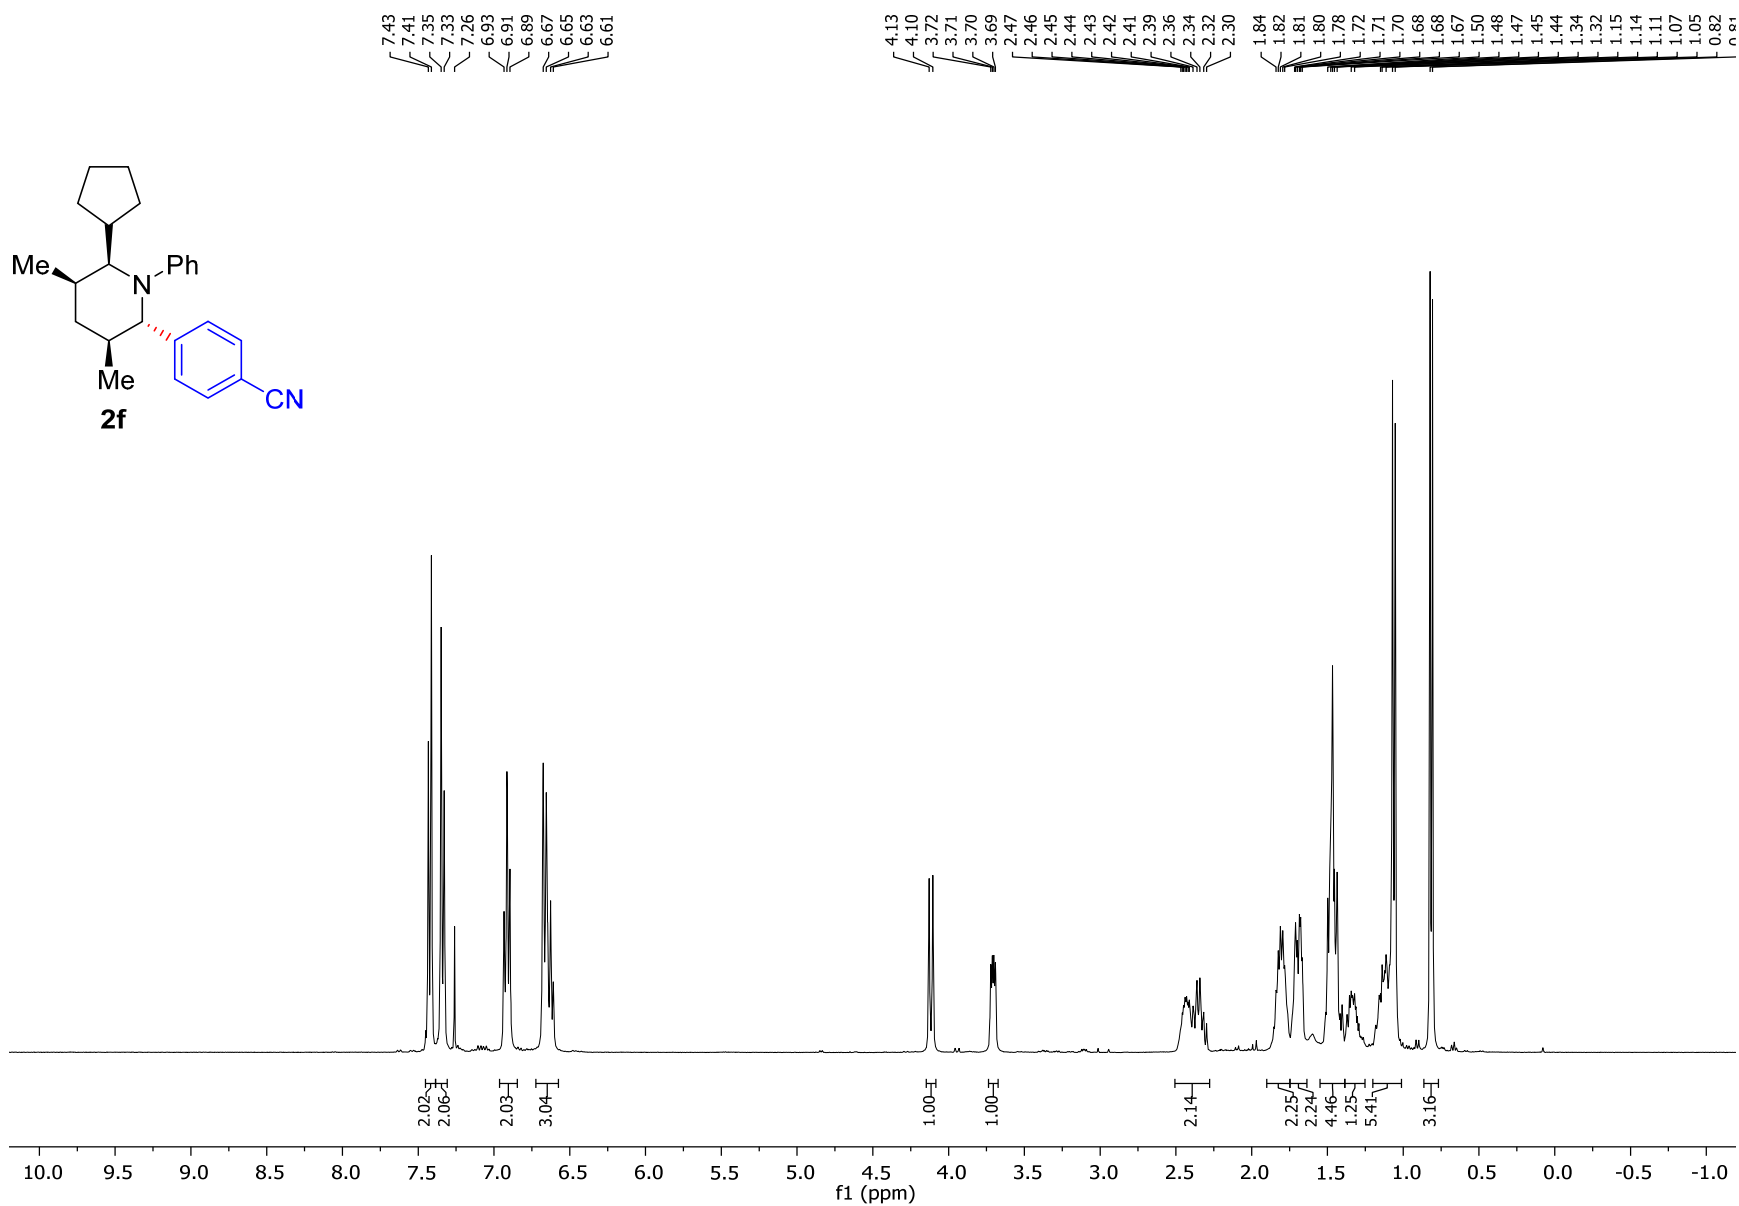

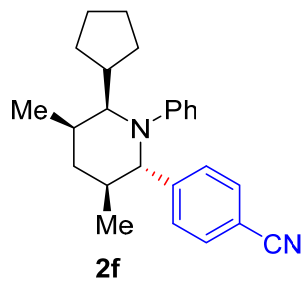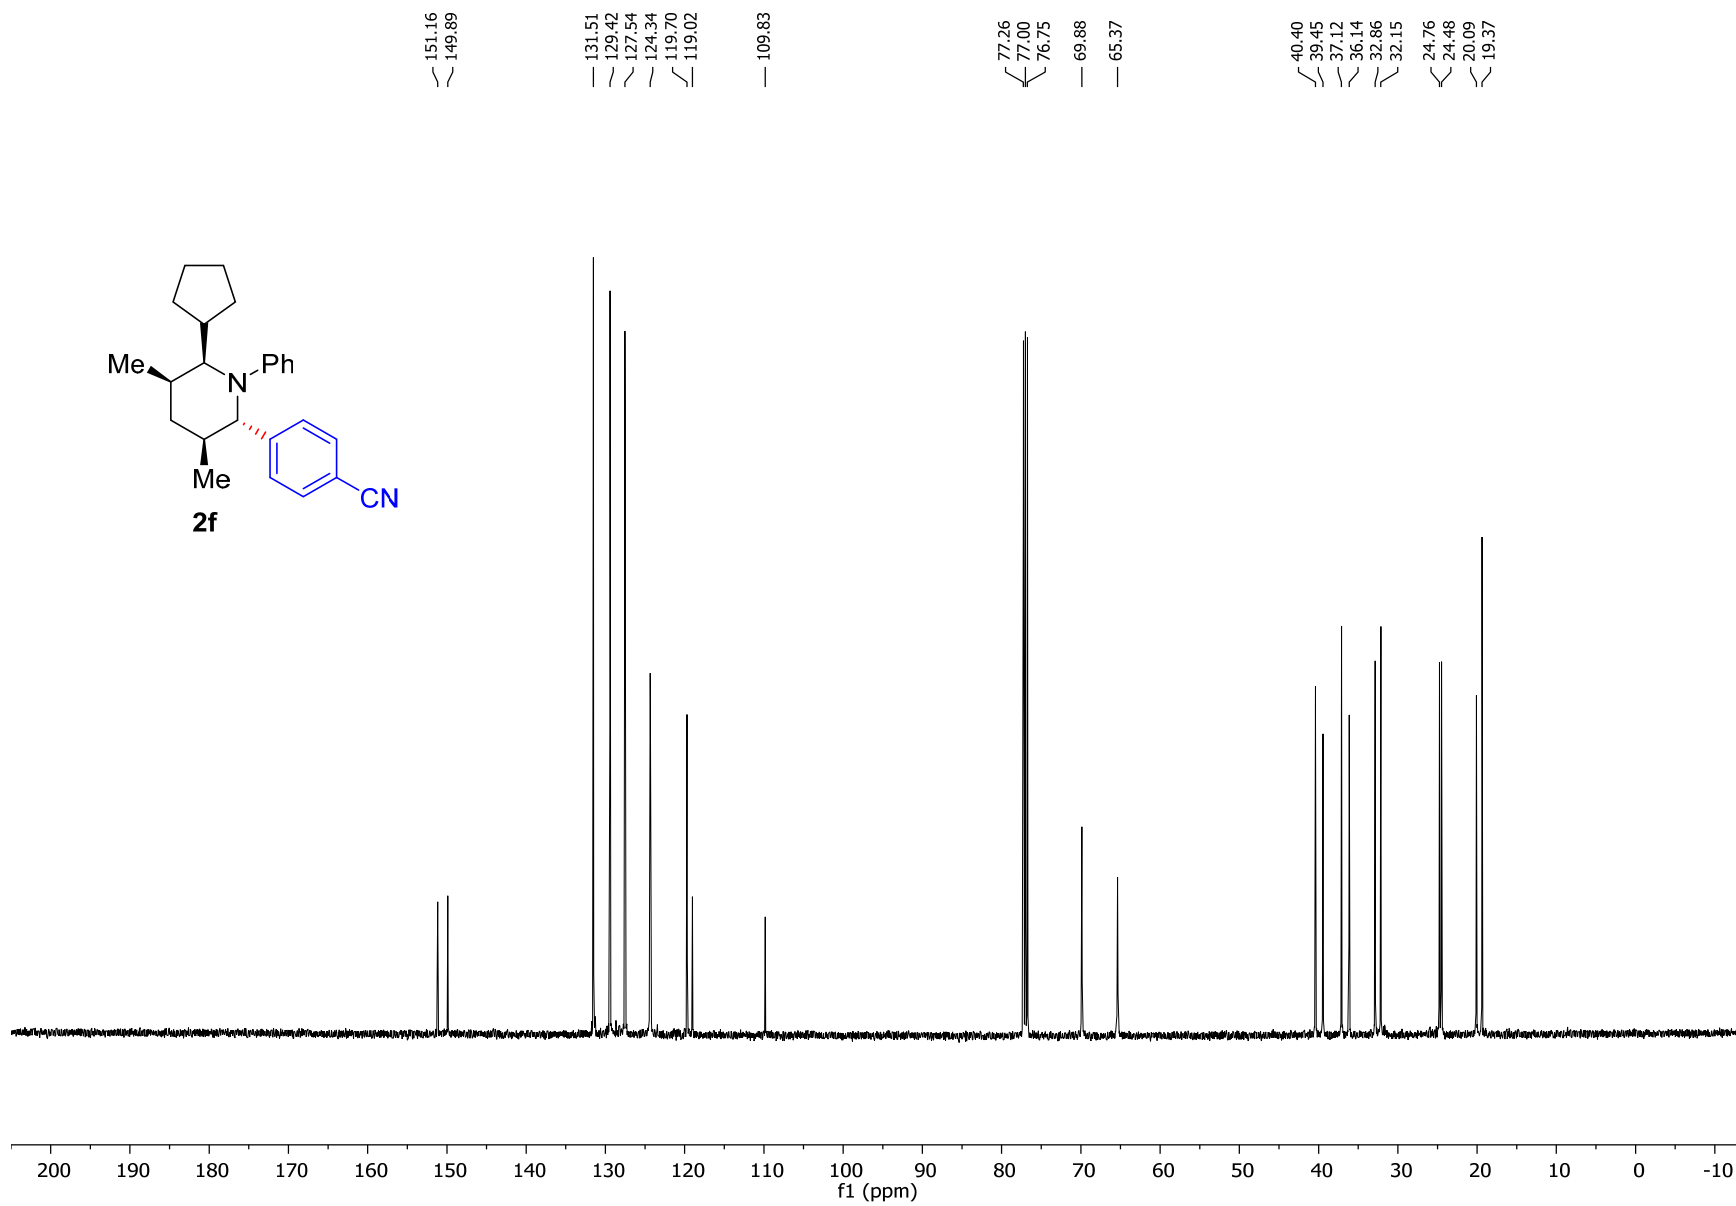

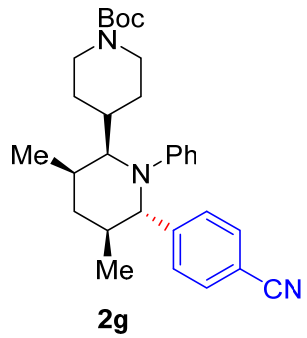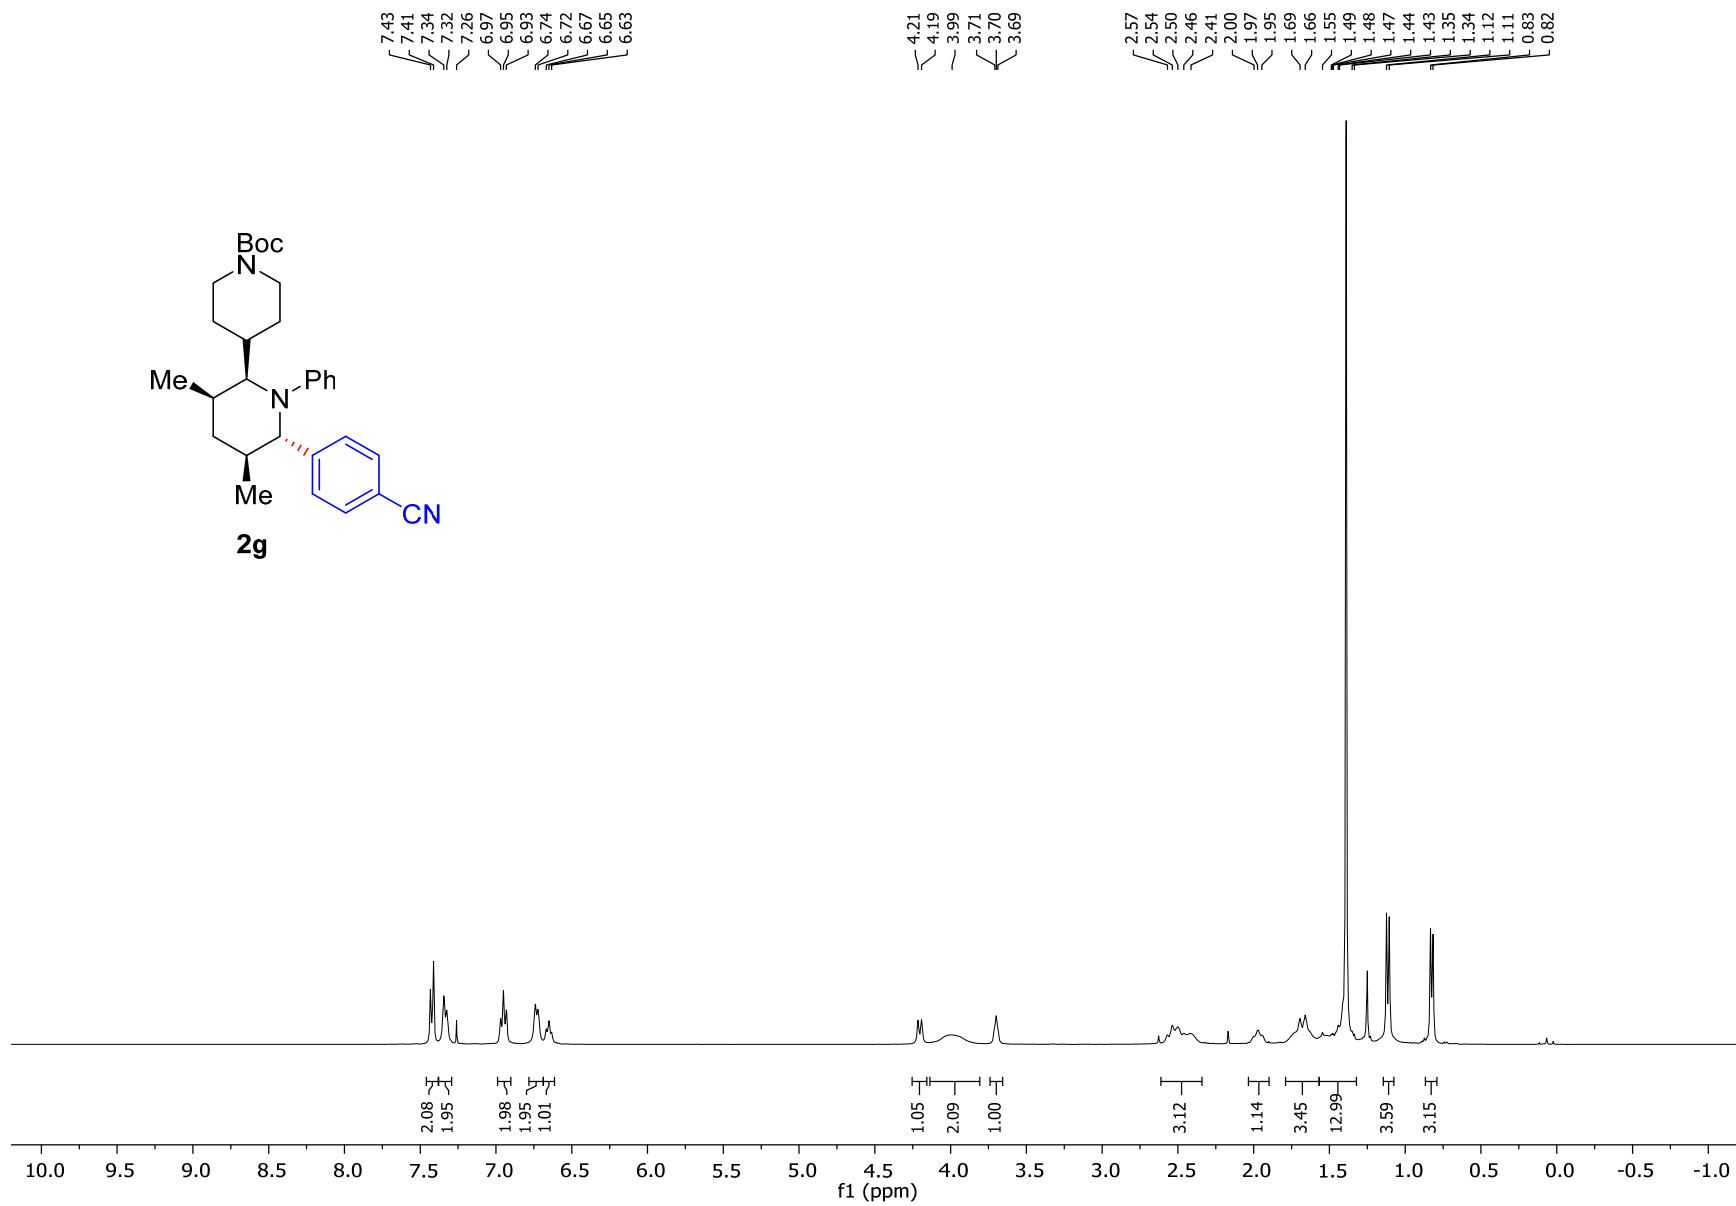

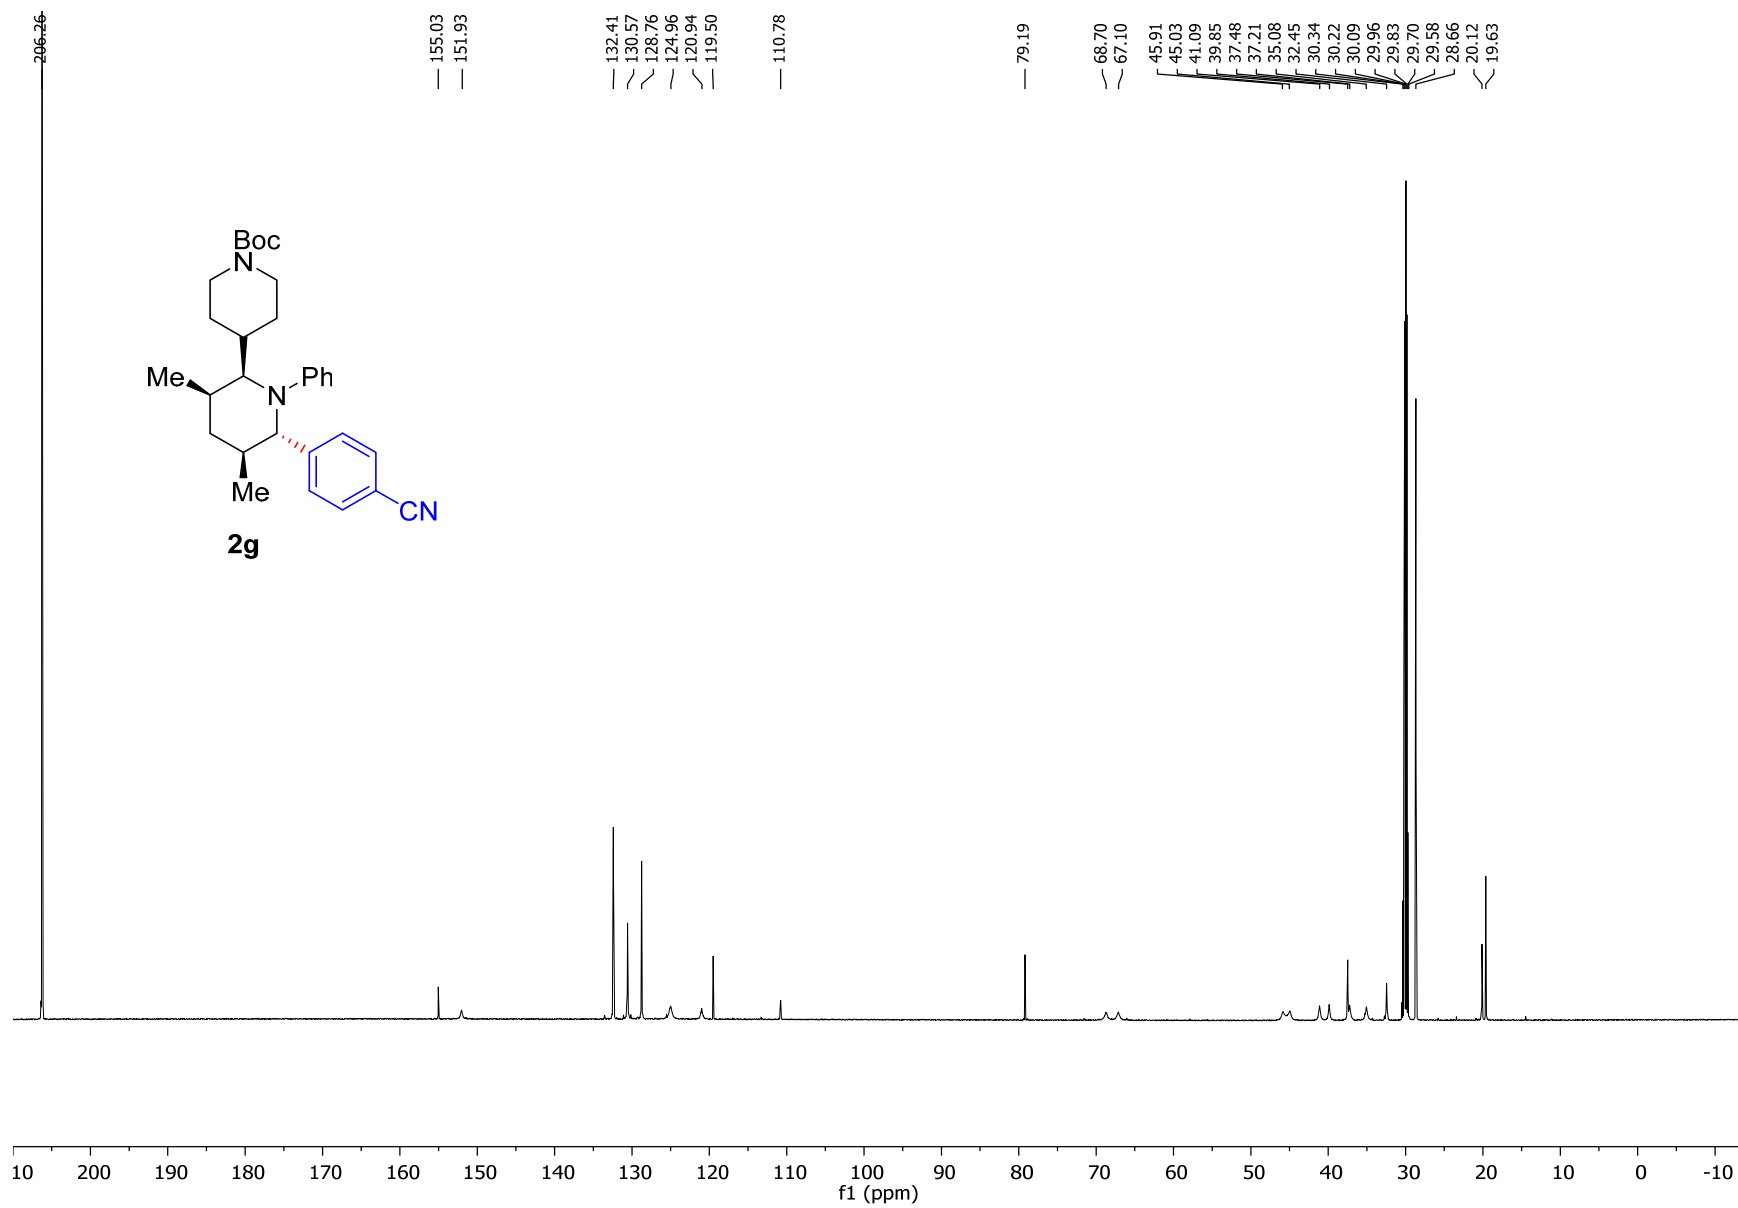

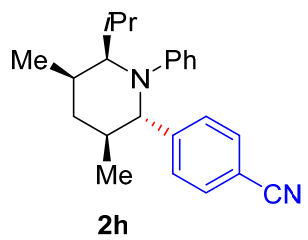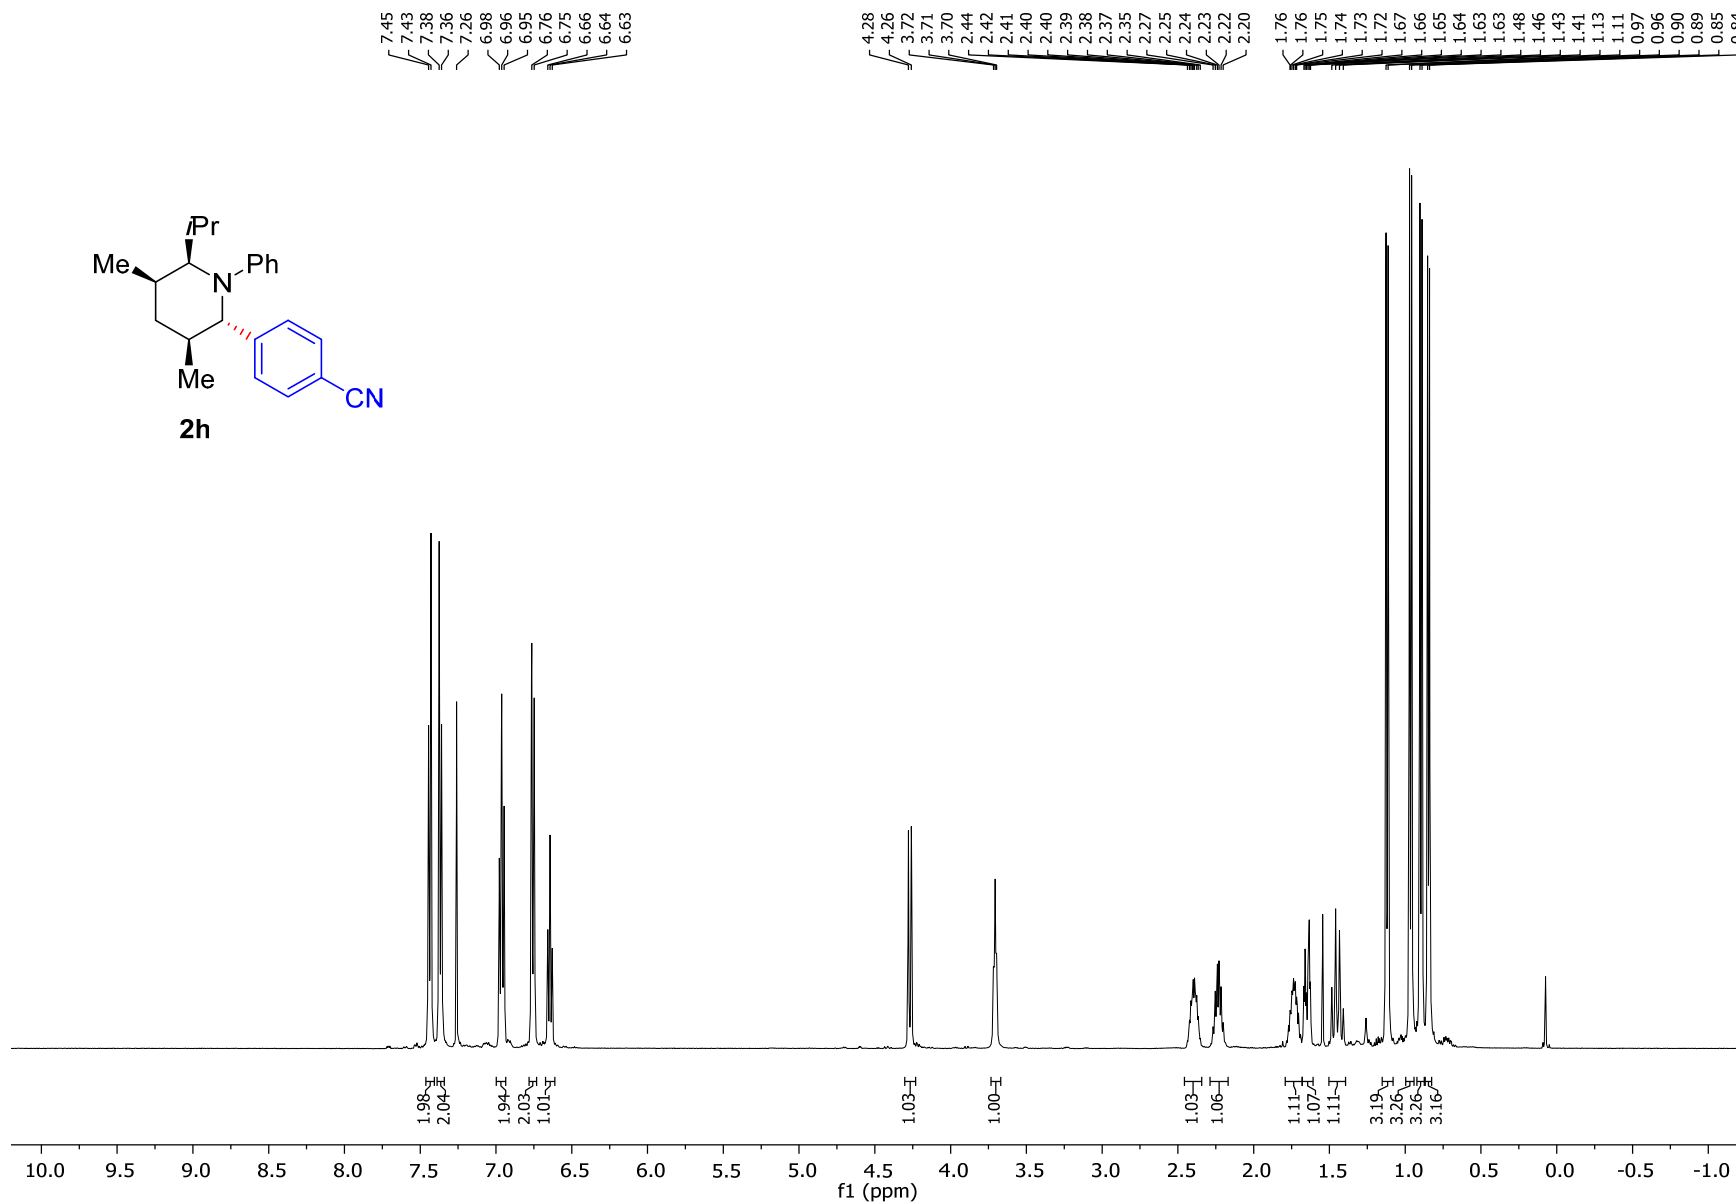

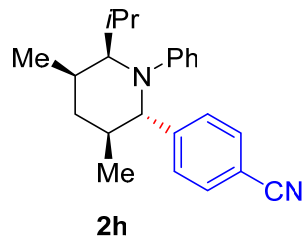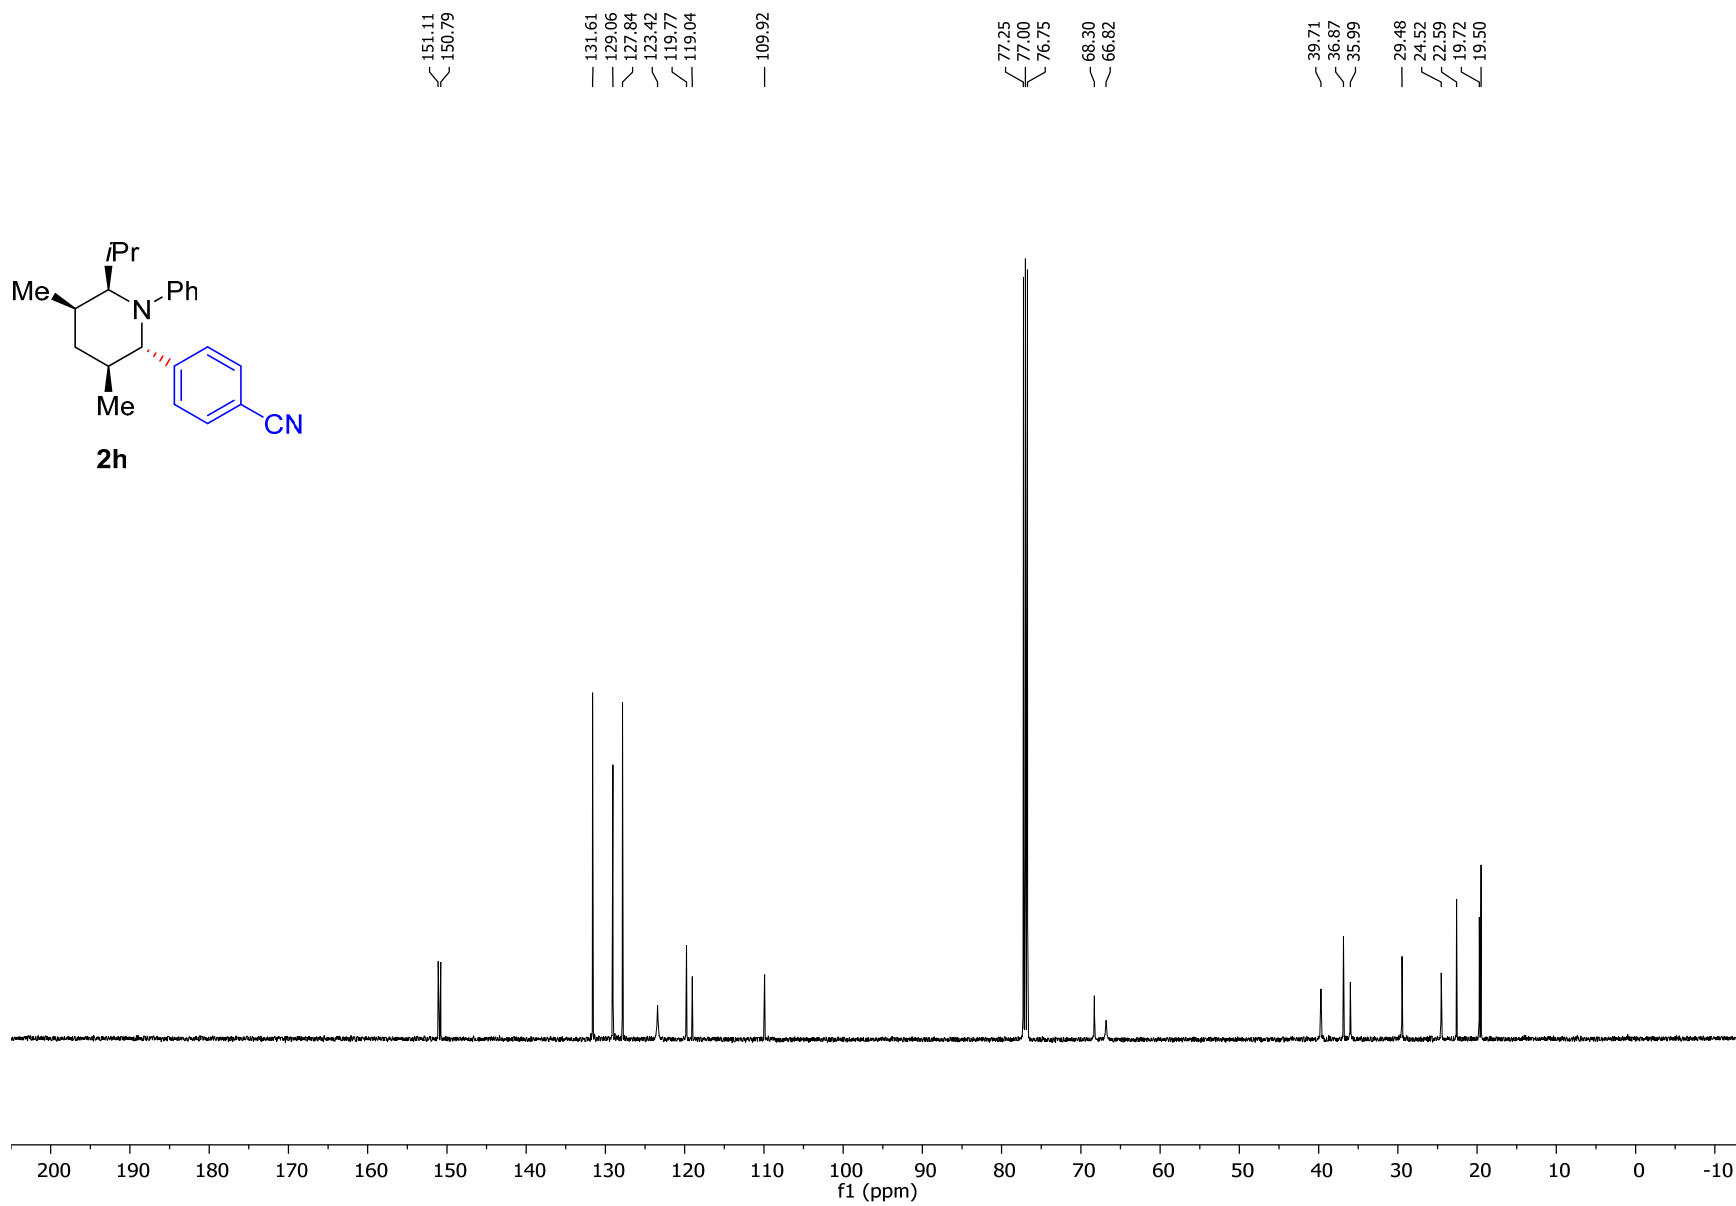

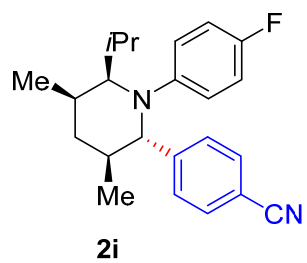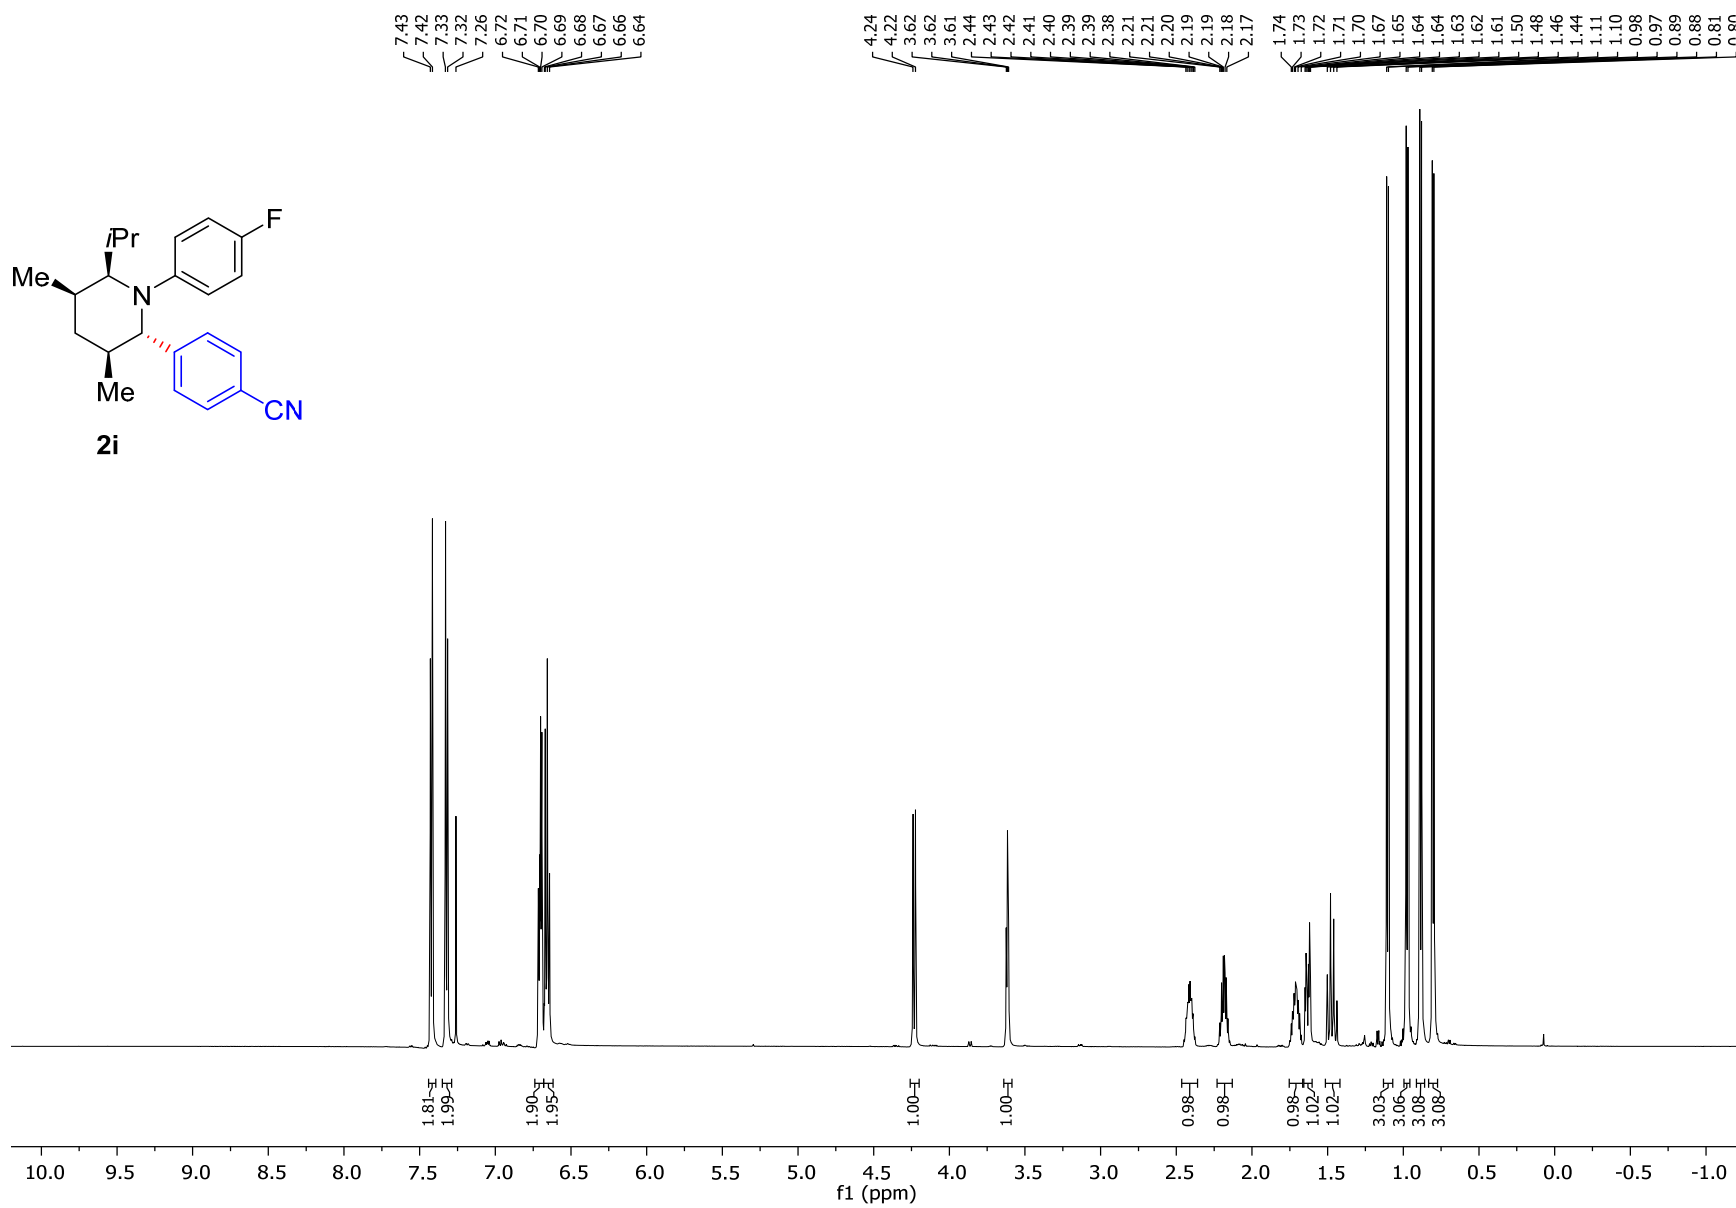



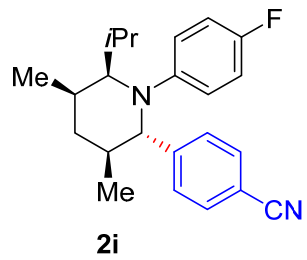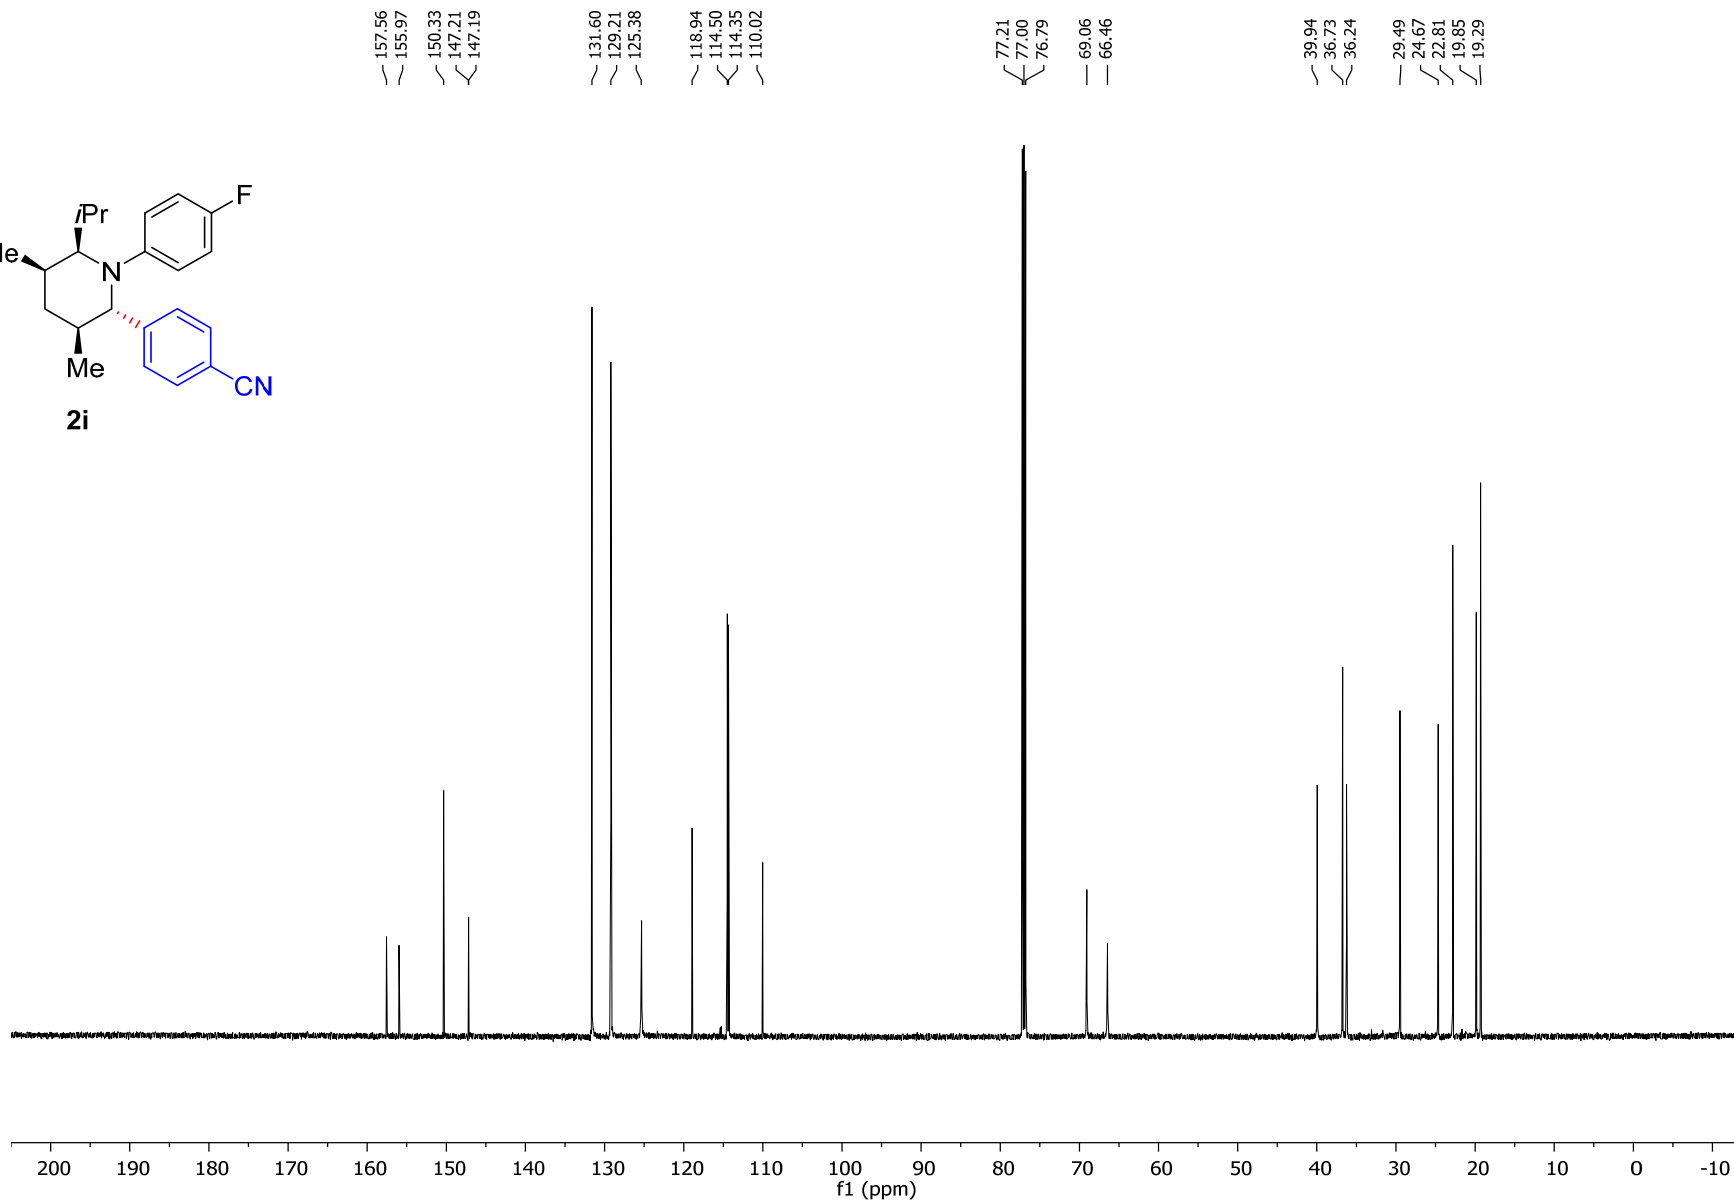

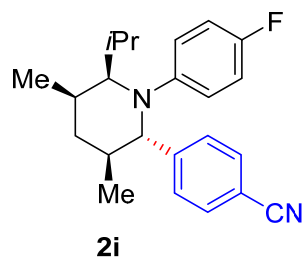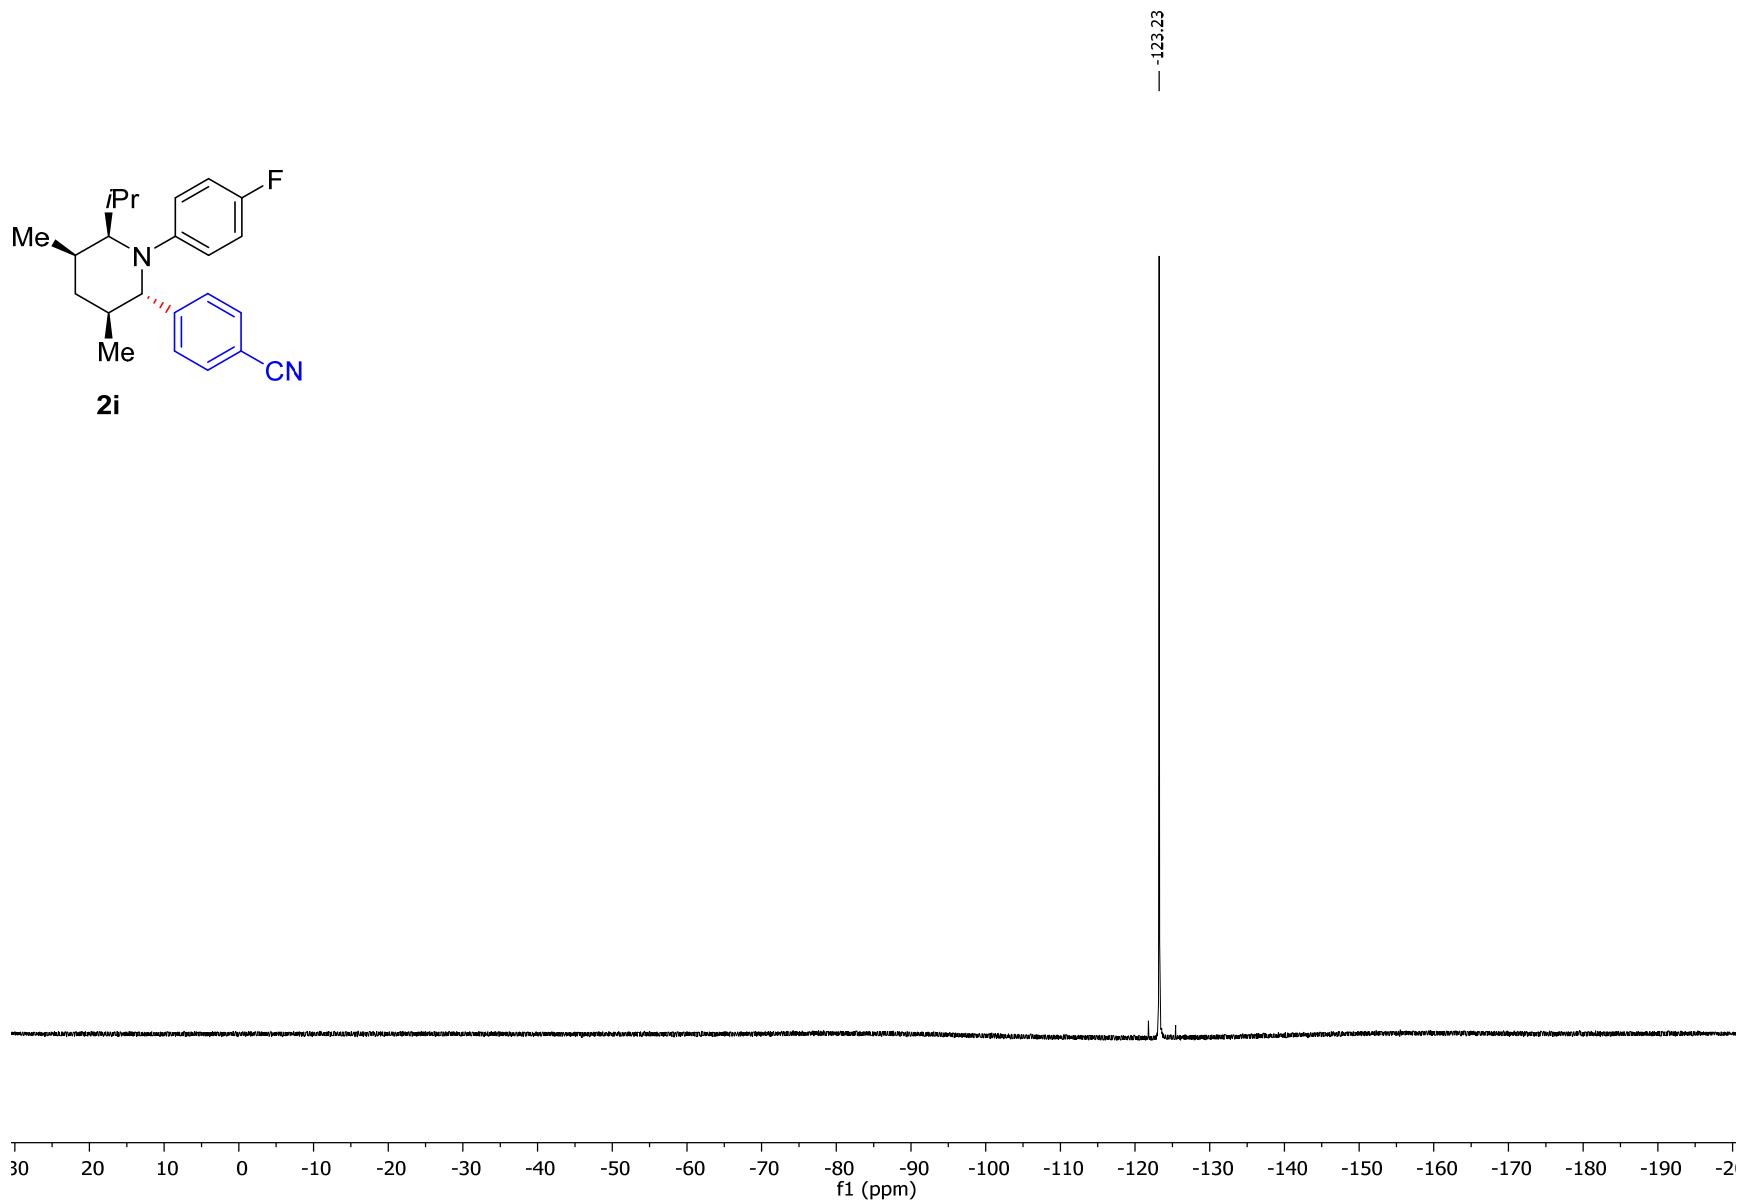

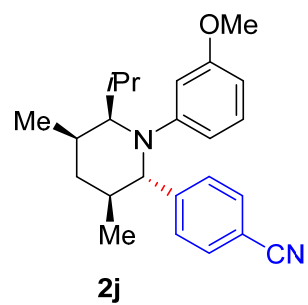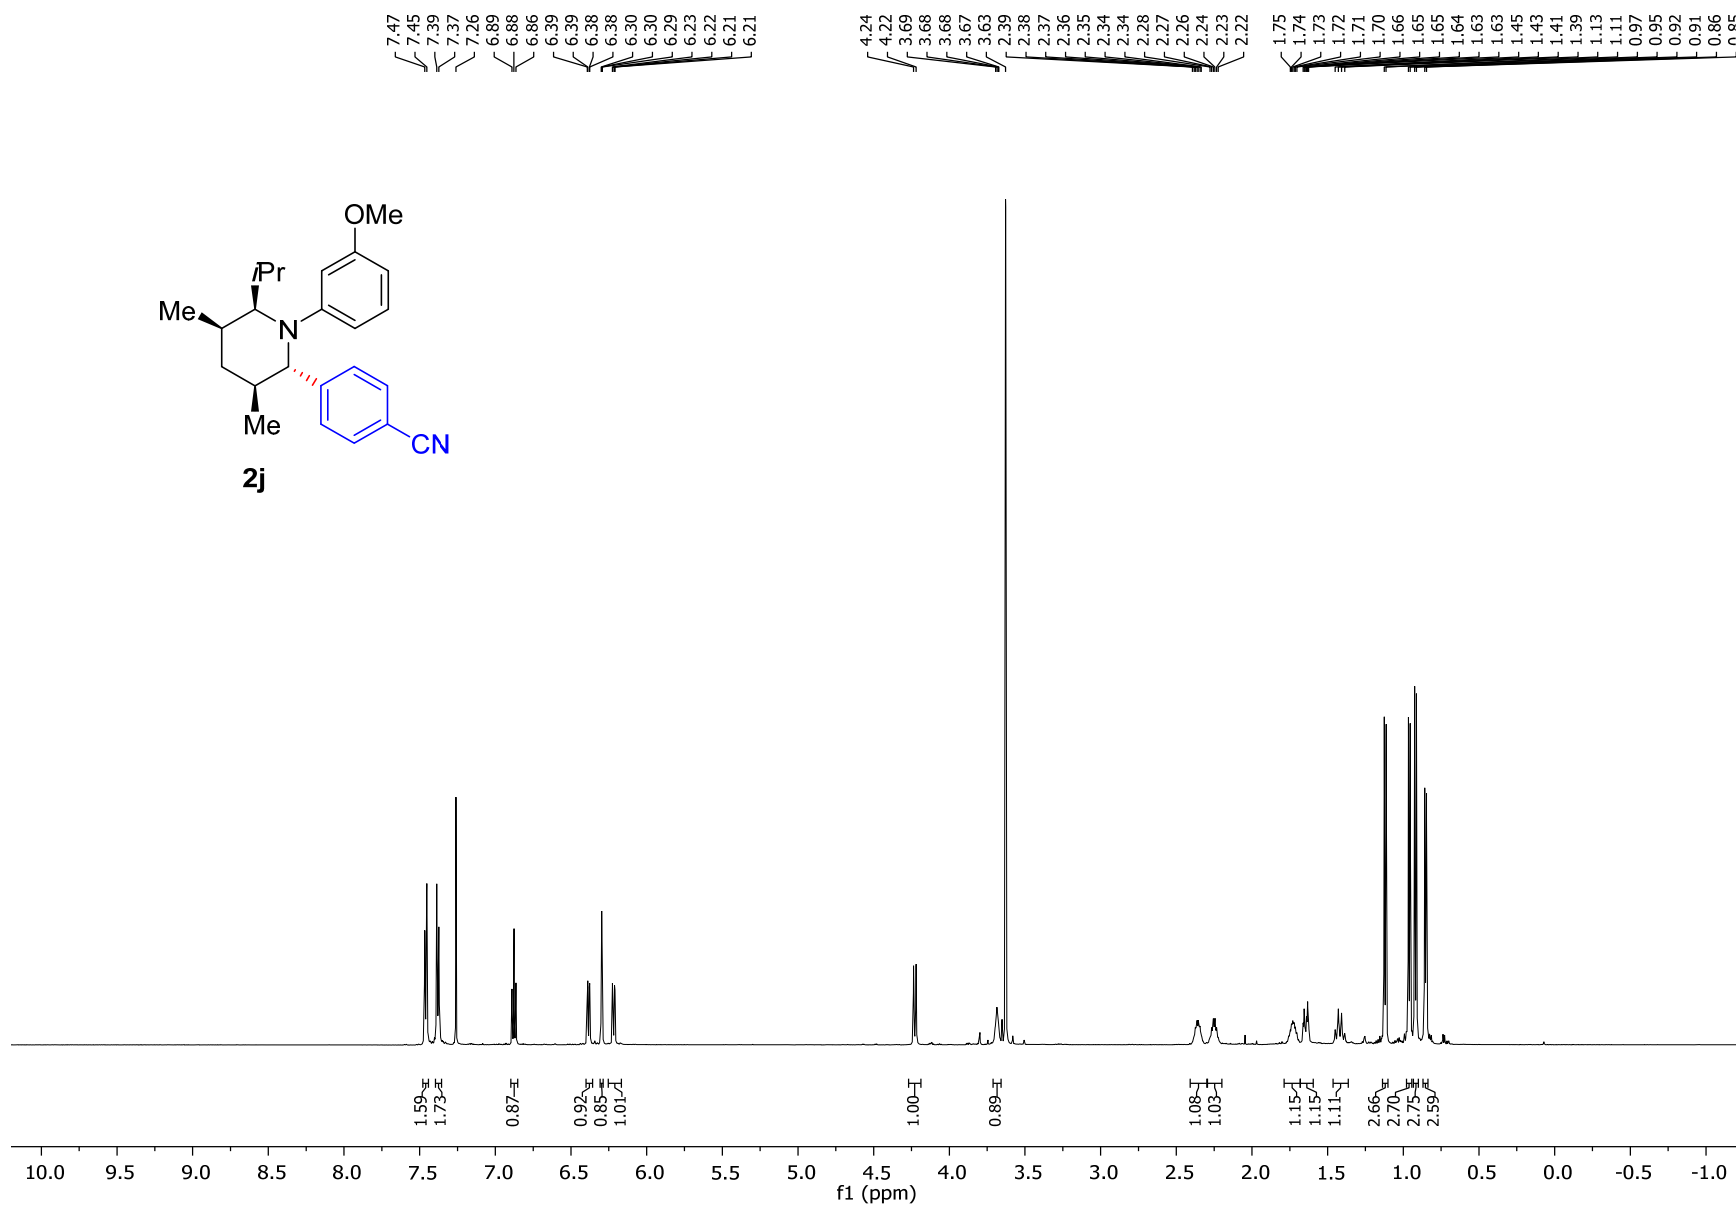

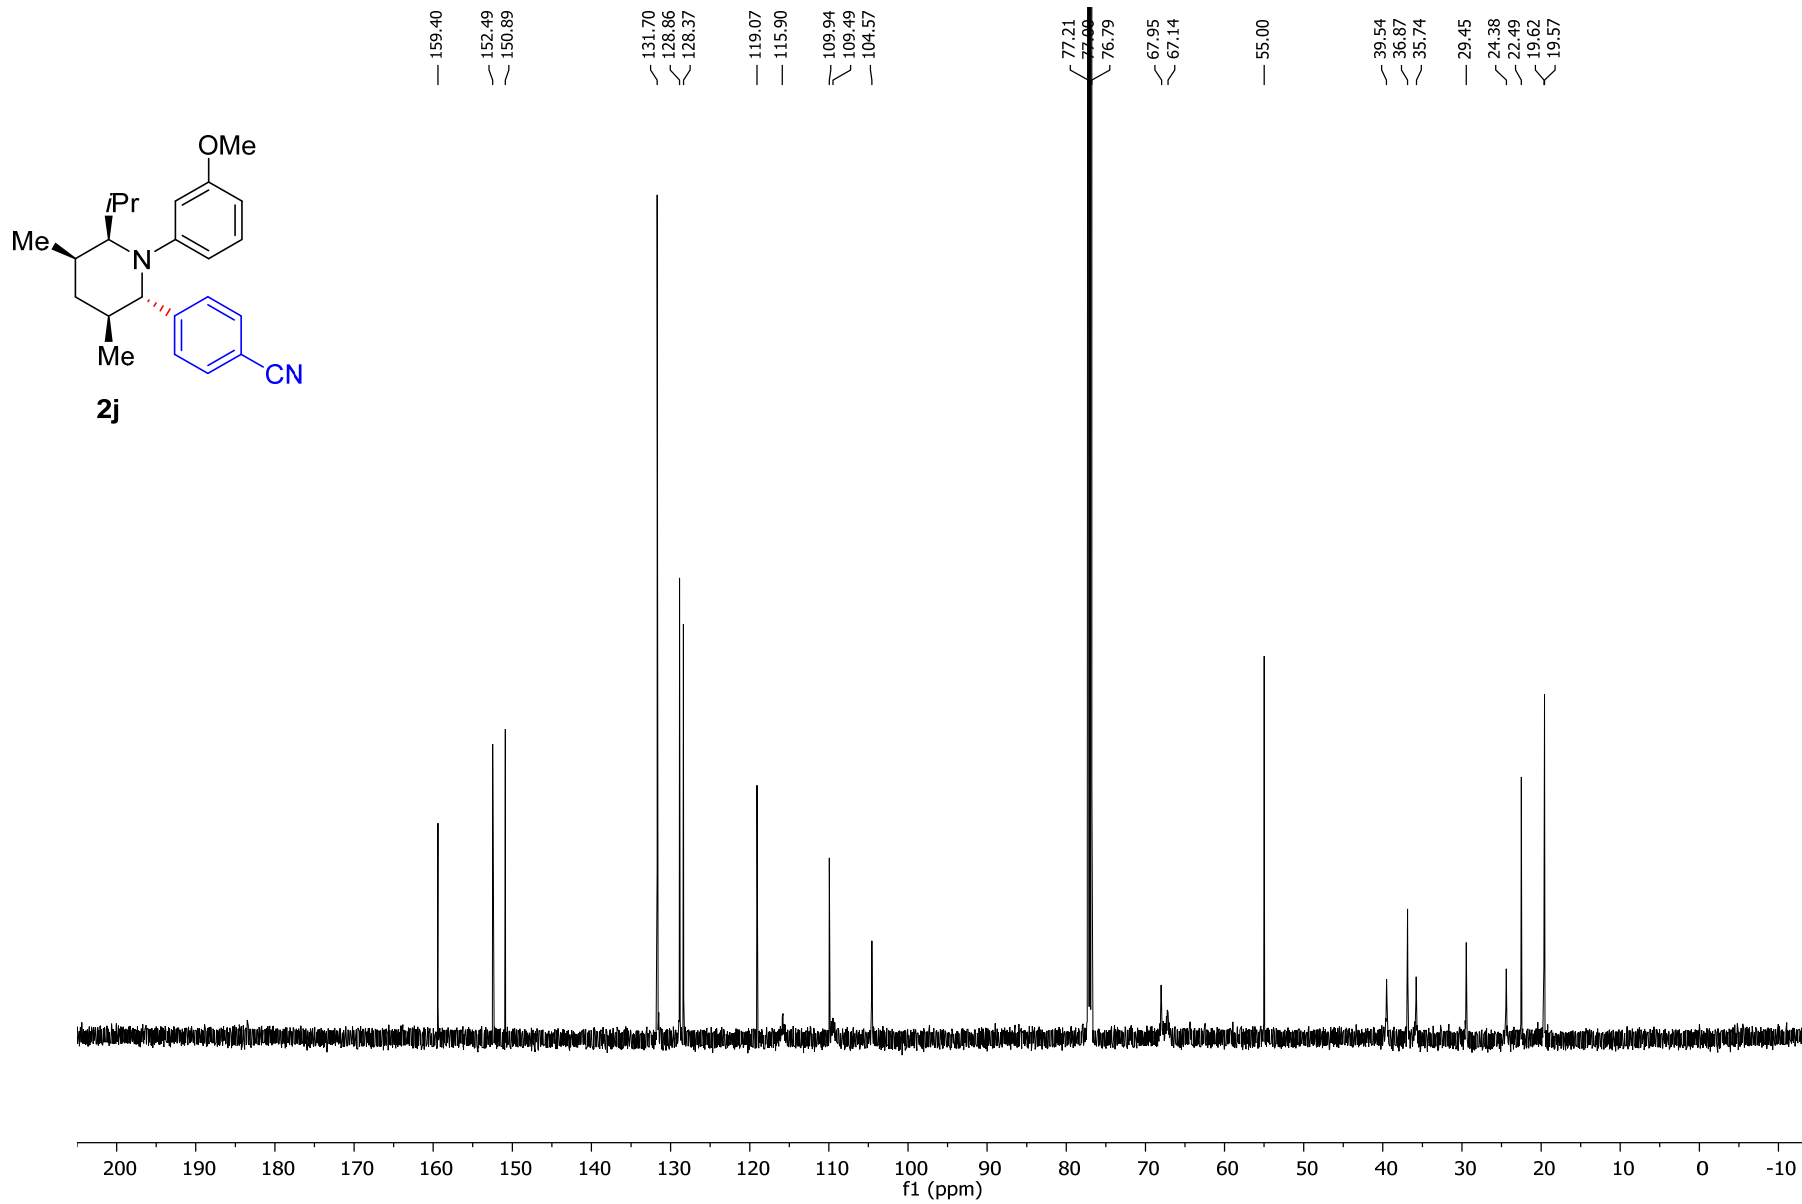

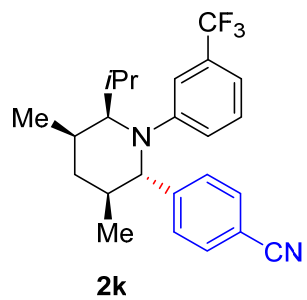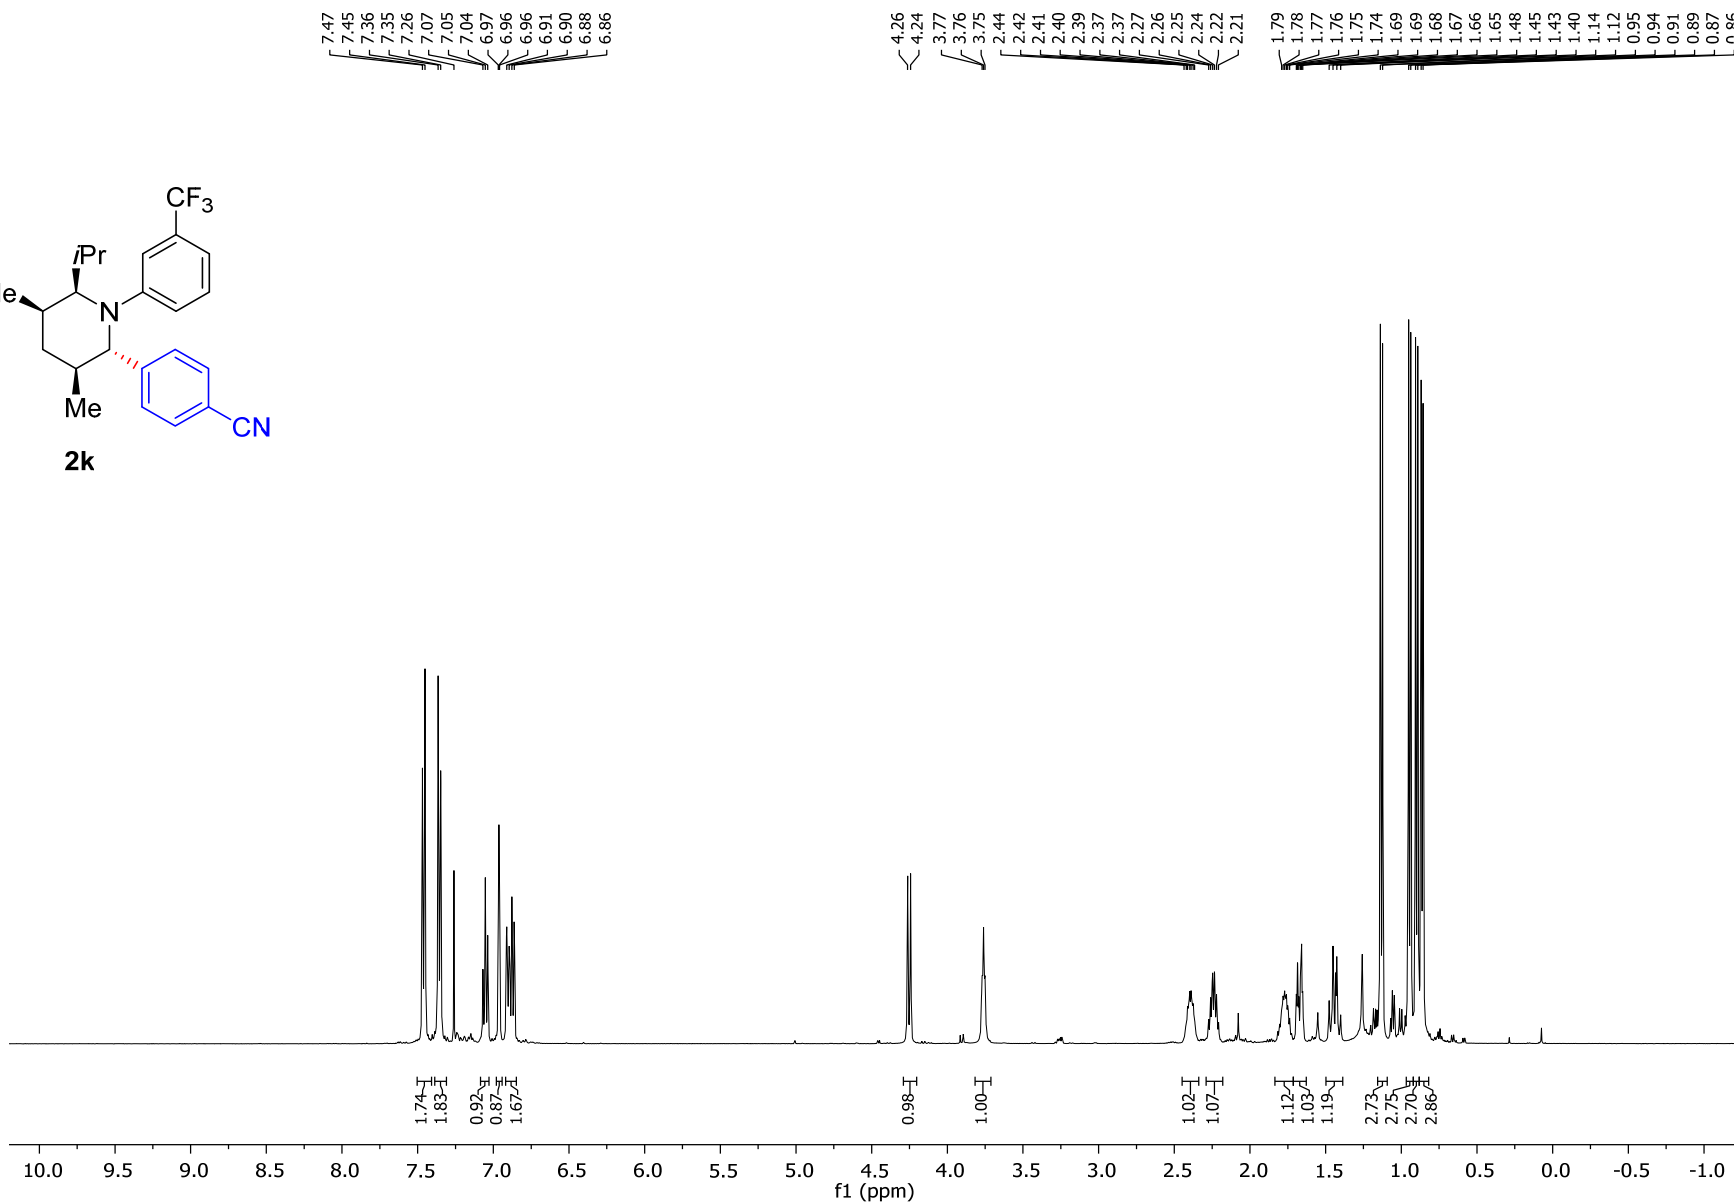

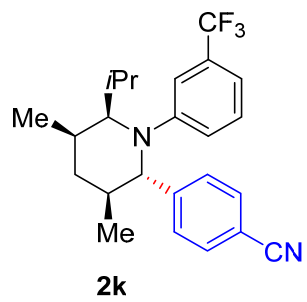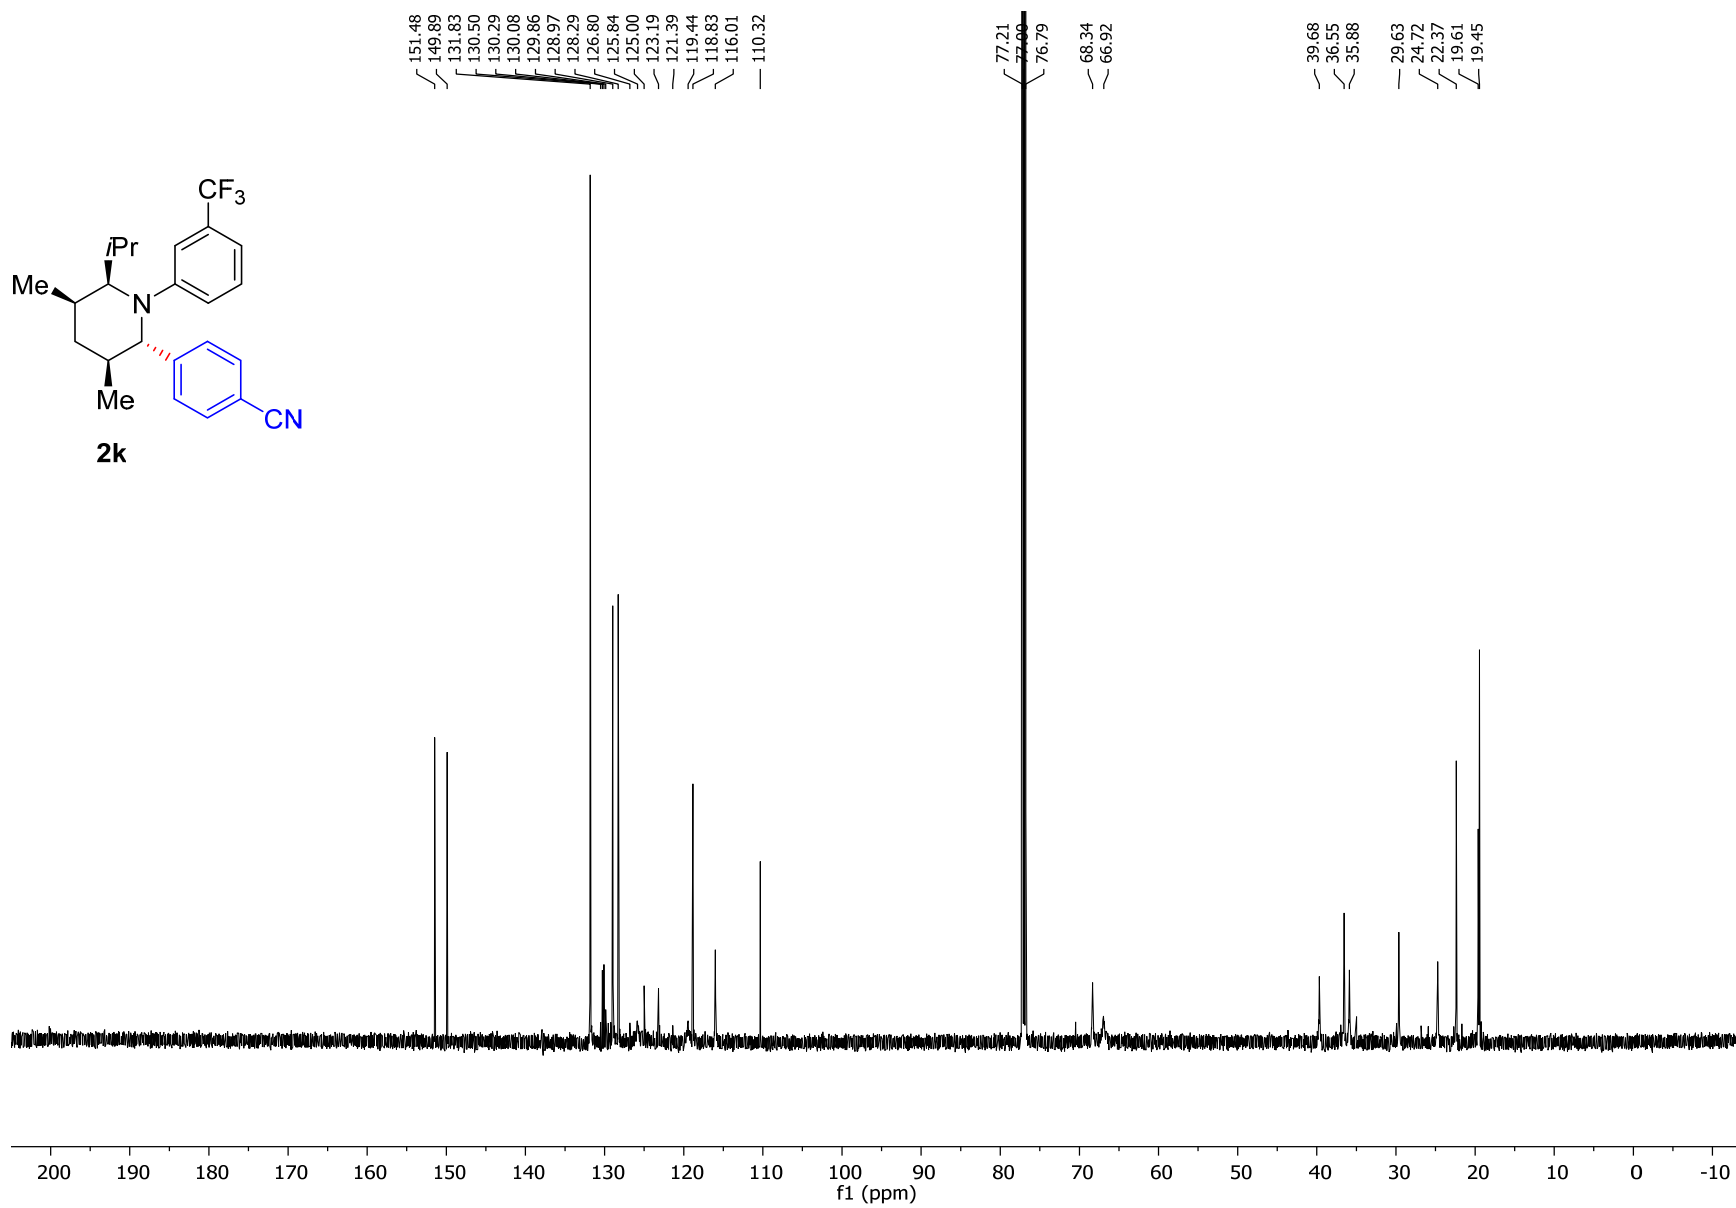

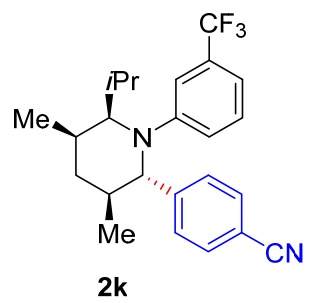

-62.92

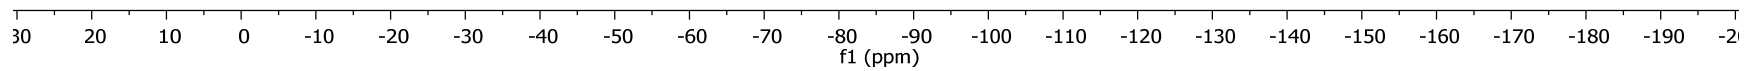

7.40  
7.39  
7.37  
7.36  
7.31  
7.29  
7.26  
7.18  
7.16  
7.09  
7.07  
7.06  
7.01  
6.99  
6.98  
6.94  
6.93  
6.85  
6.83  
6.75  
6.74  
6.73  
4.36  
4.35  
4.09  
4.08  
3.53  
3.52  
3.51  
3.51  
2.60  
2.58  
2.28  
2.27  
2.26  
2.26  
2.25  
2.24  
2.24  
2.24  
2.15  
2.15  
2.14  
1.91  
1.91  
1.90  
1.90  
1.89  
1.88  
1.87  
1.86  
1.84  
1.84  
1.84  
1.83  
1.83  
1.82  
1.54  
1.52  
1.51  
1.51  
1.50  
1.49  
1.48  
1.46  
1.45  
1.45  
1.30  
1.30  
1.29  
1.28  
1.26  
1.26  
1.13  
1.12  
1.02  
1.01  
0.99  
0.98  
0.98  
0.97  
0.94  
0.94  
0.92  
0.91  
0.68  
0.67  
0.66  
0.64  
0.60  
0.59  
0.27  
0.26  
0.25

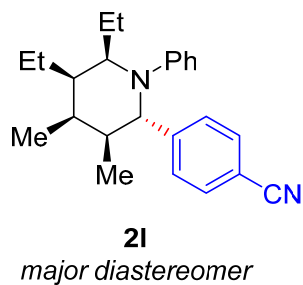

+

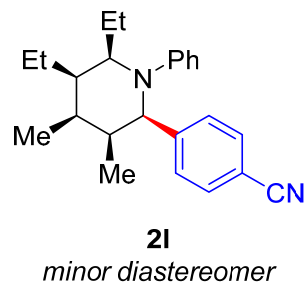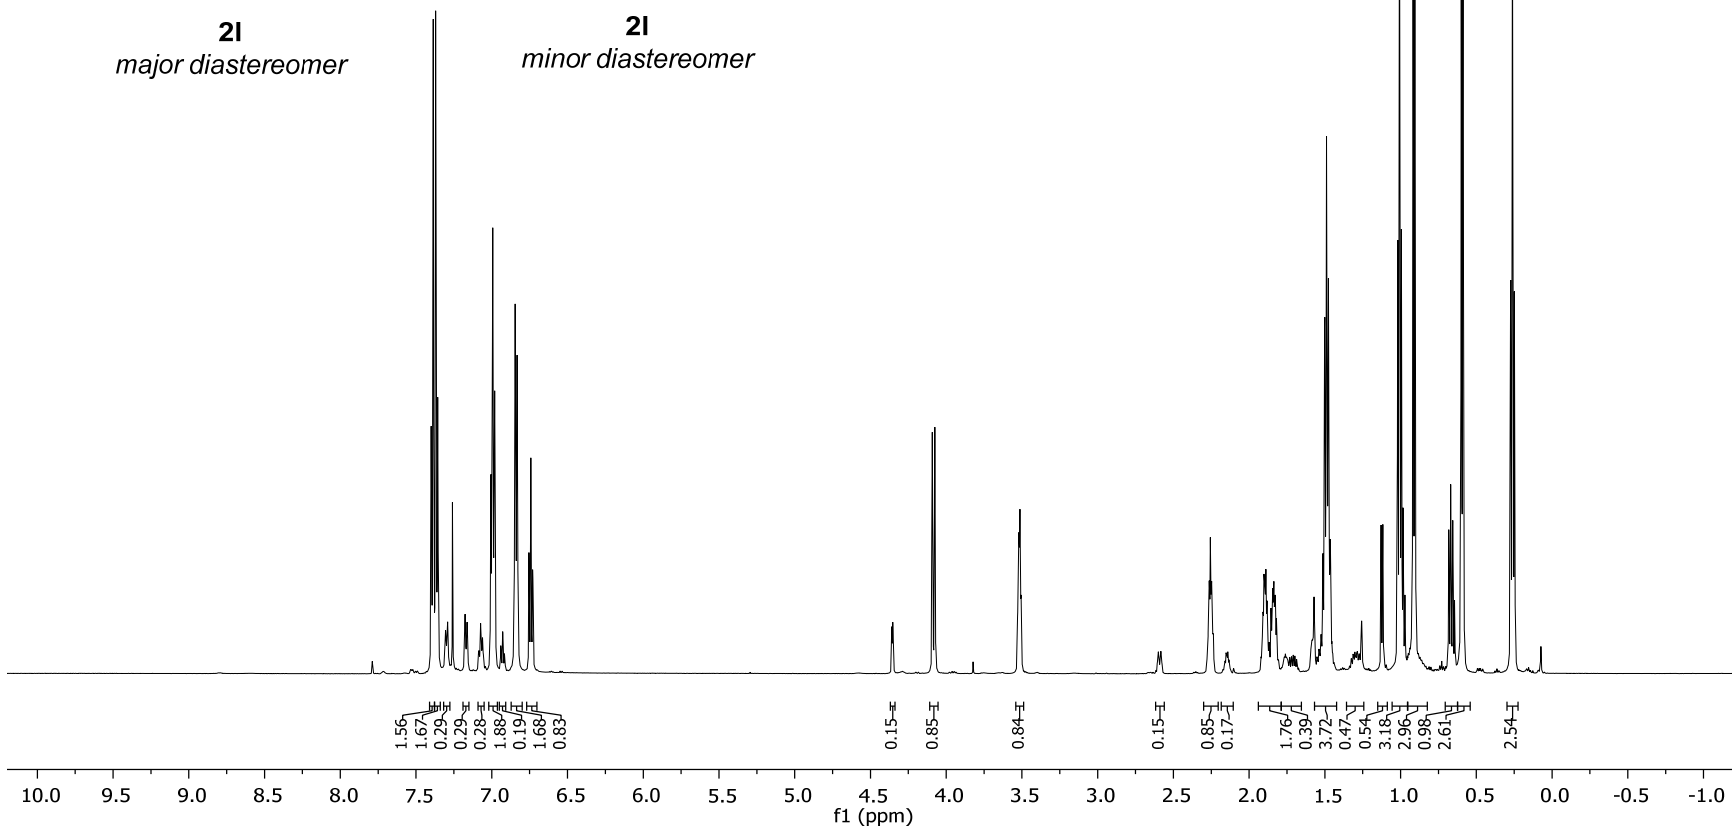



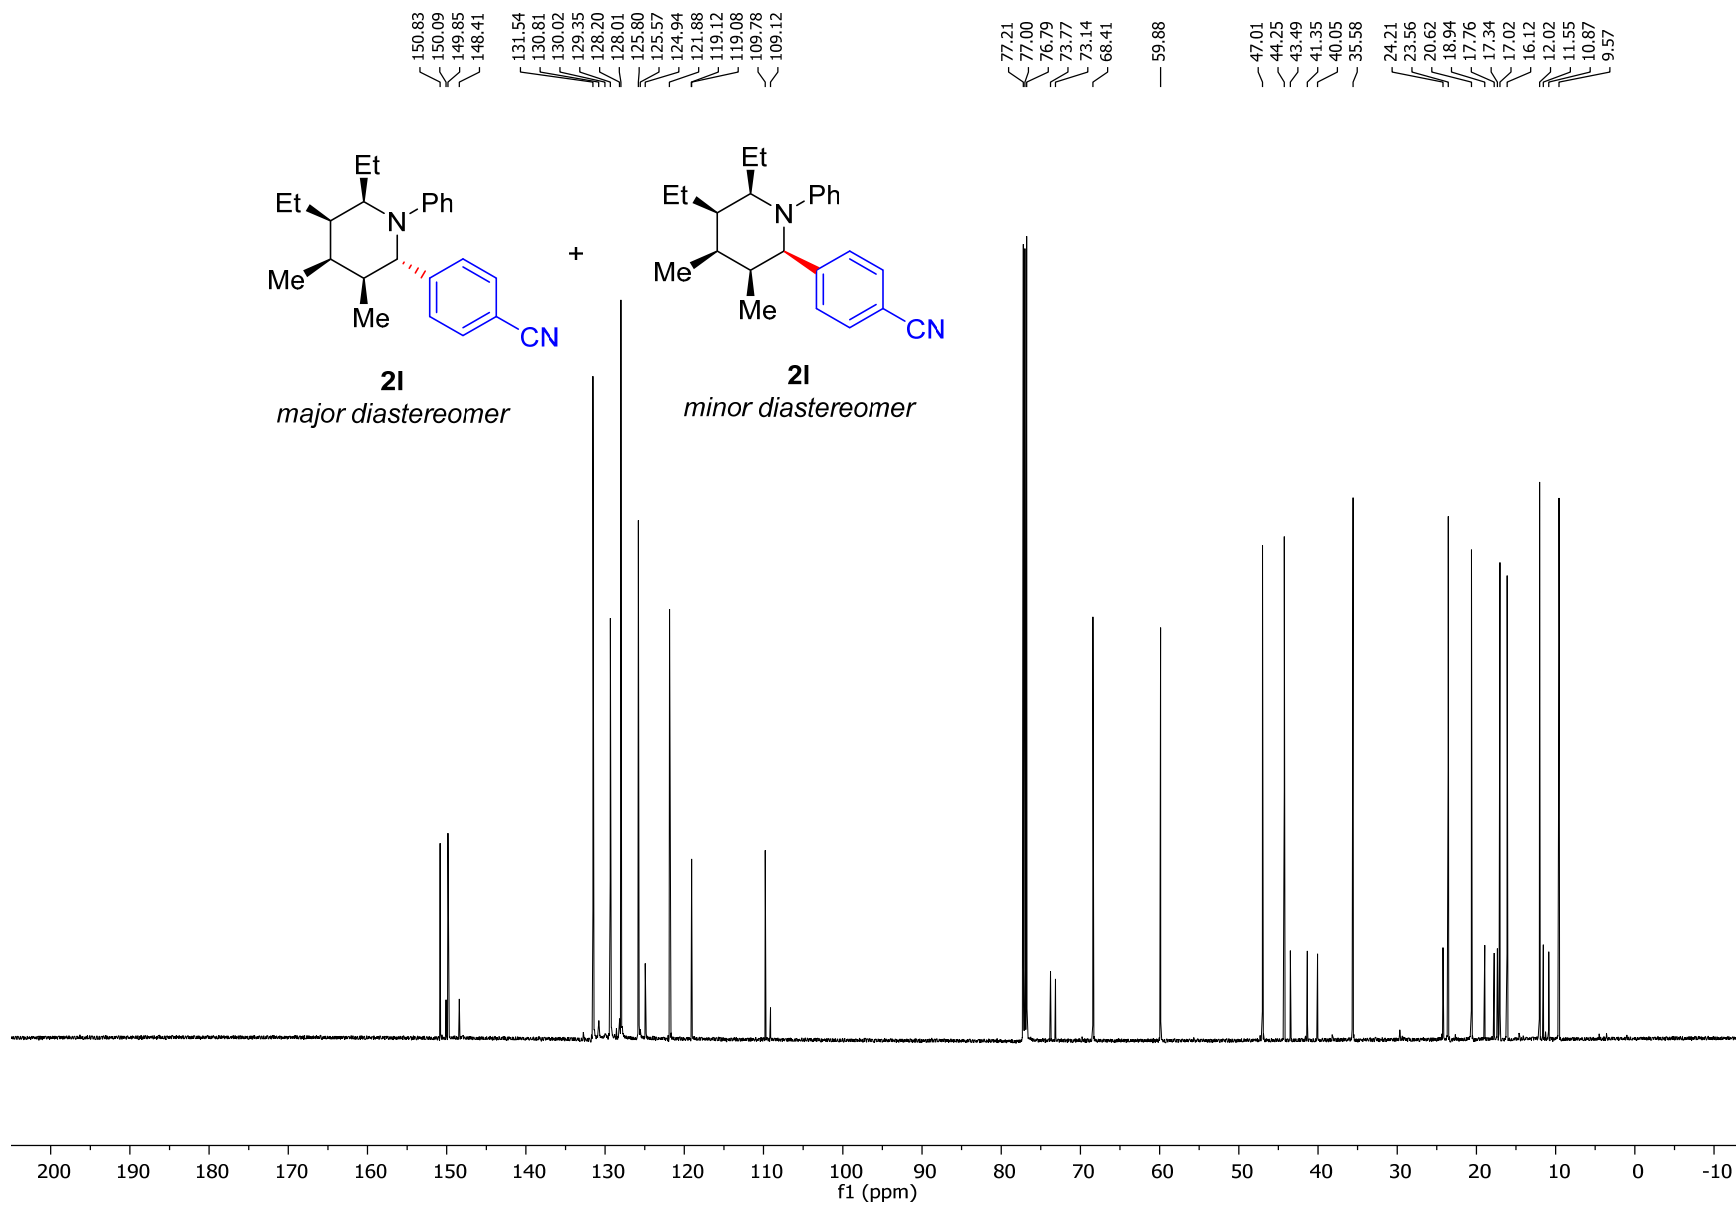

NOE  
500 MHz

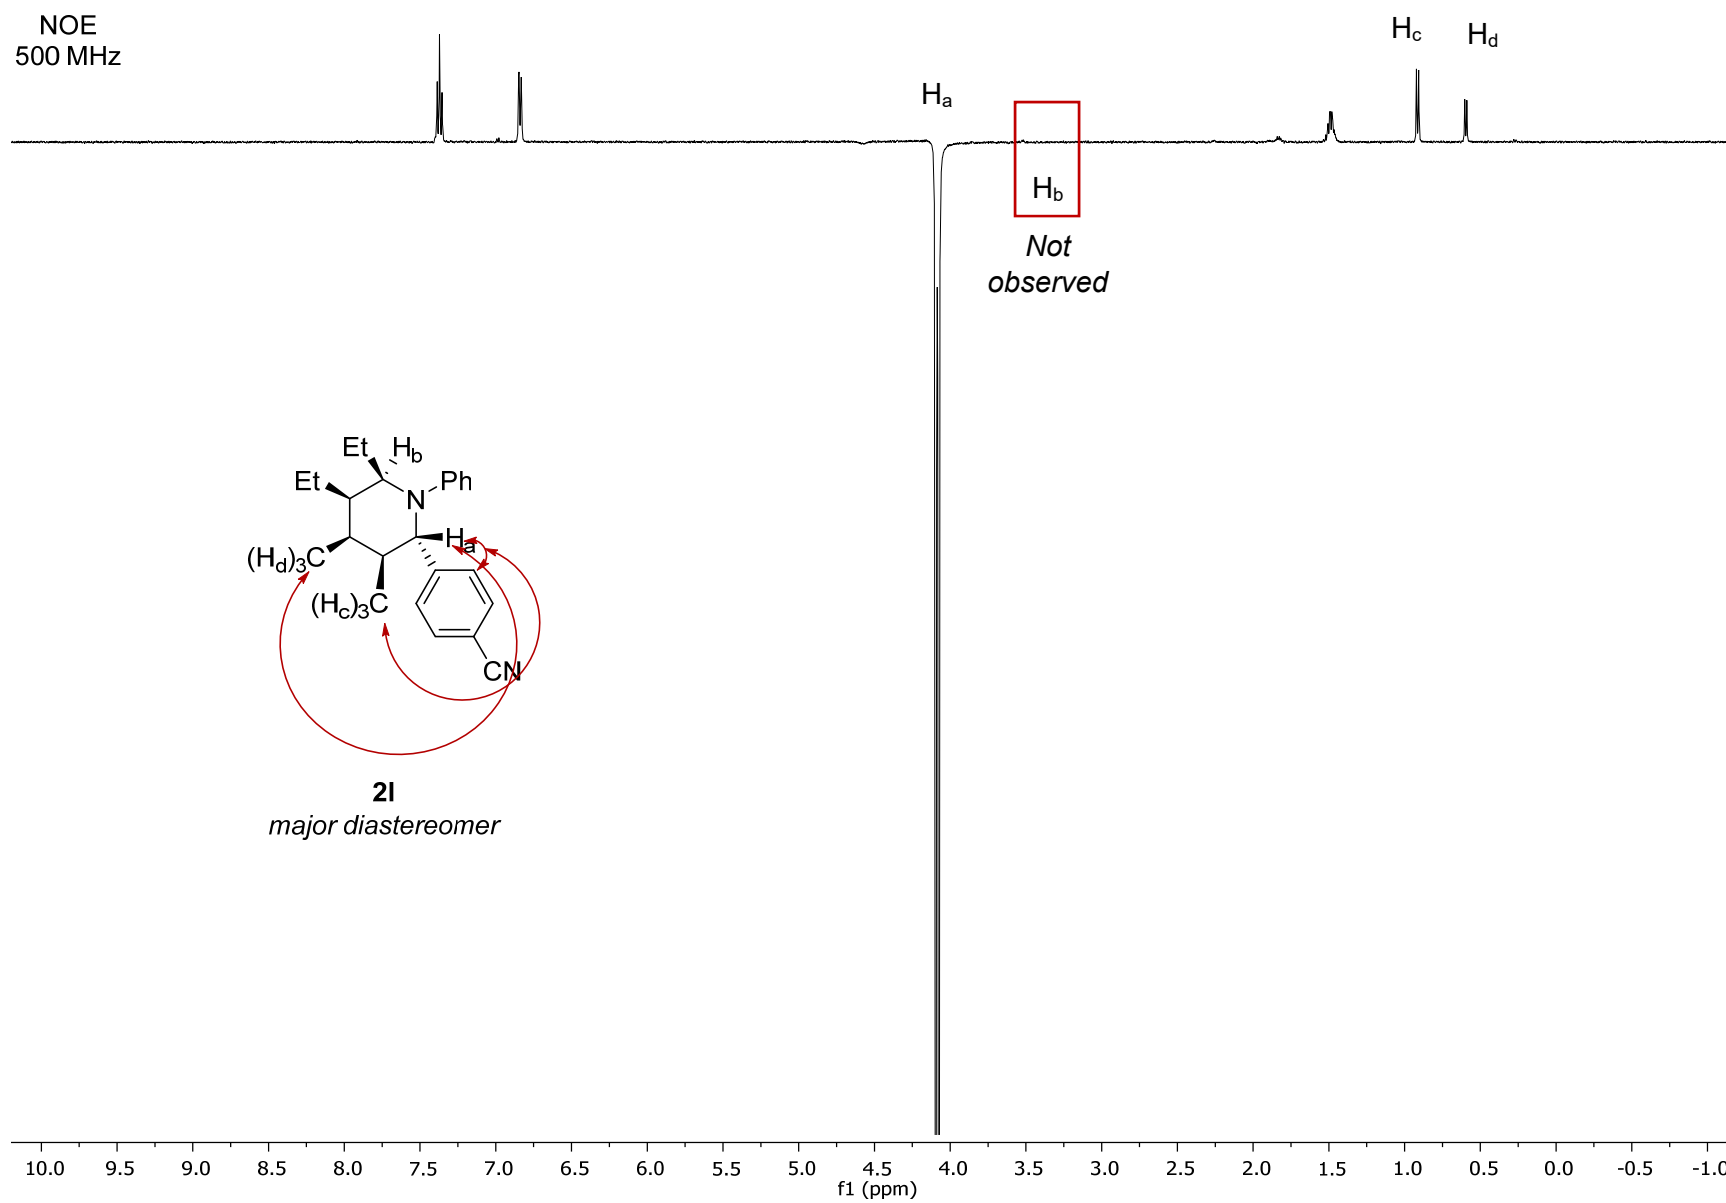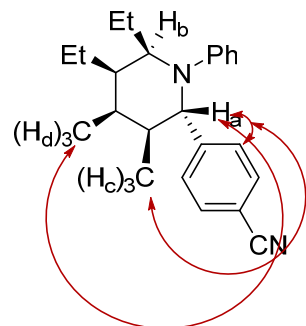

**21**  
major diastereomer

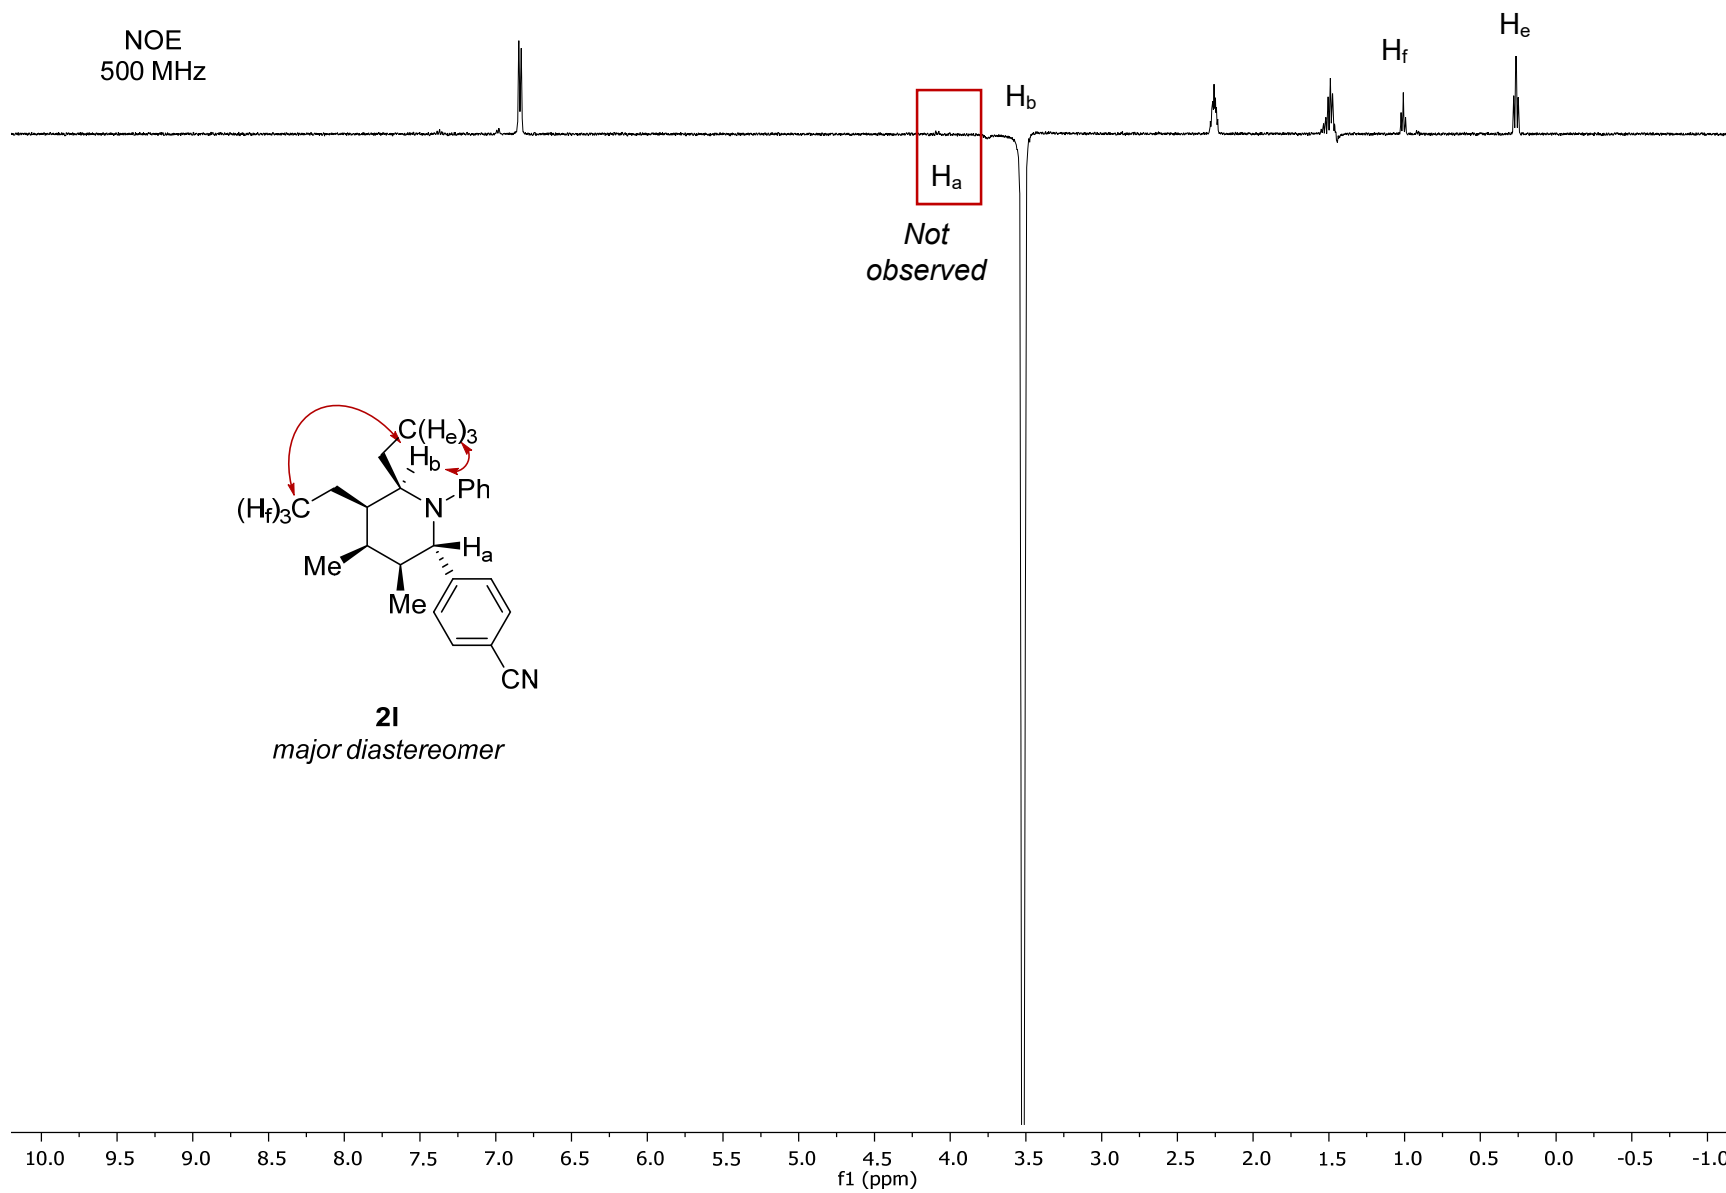

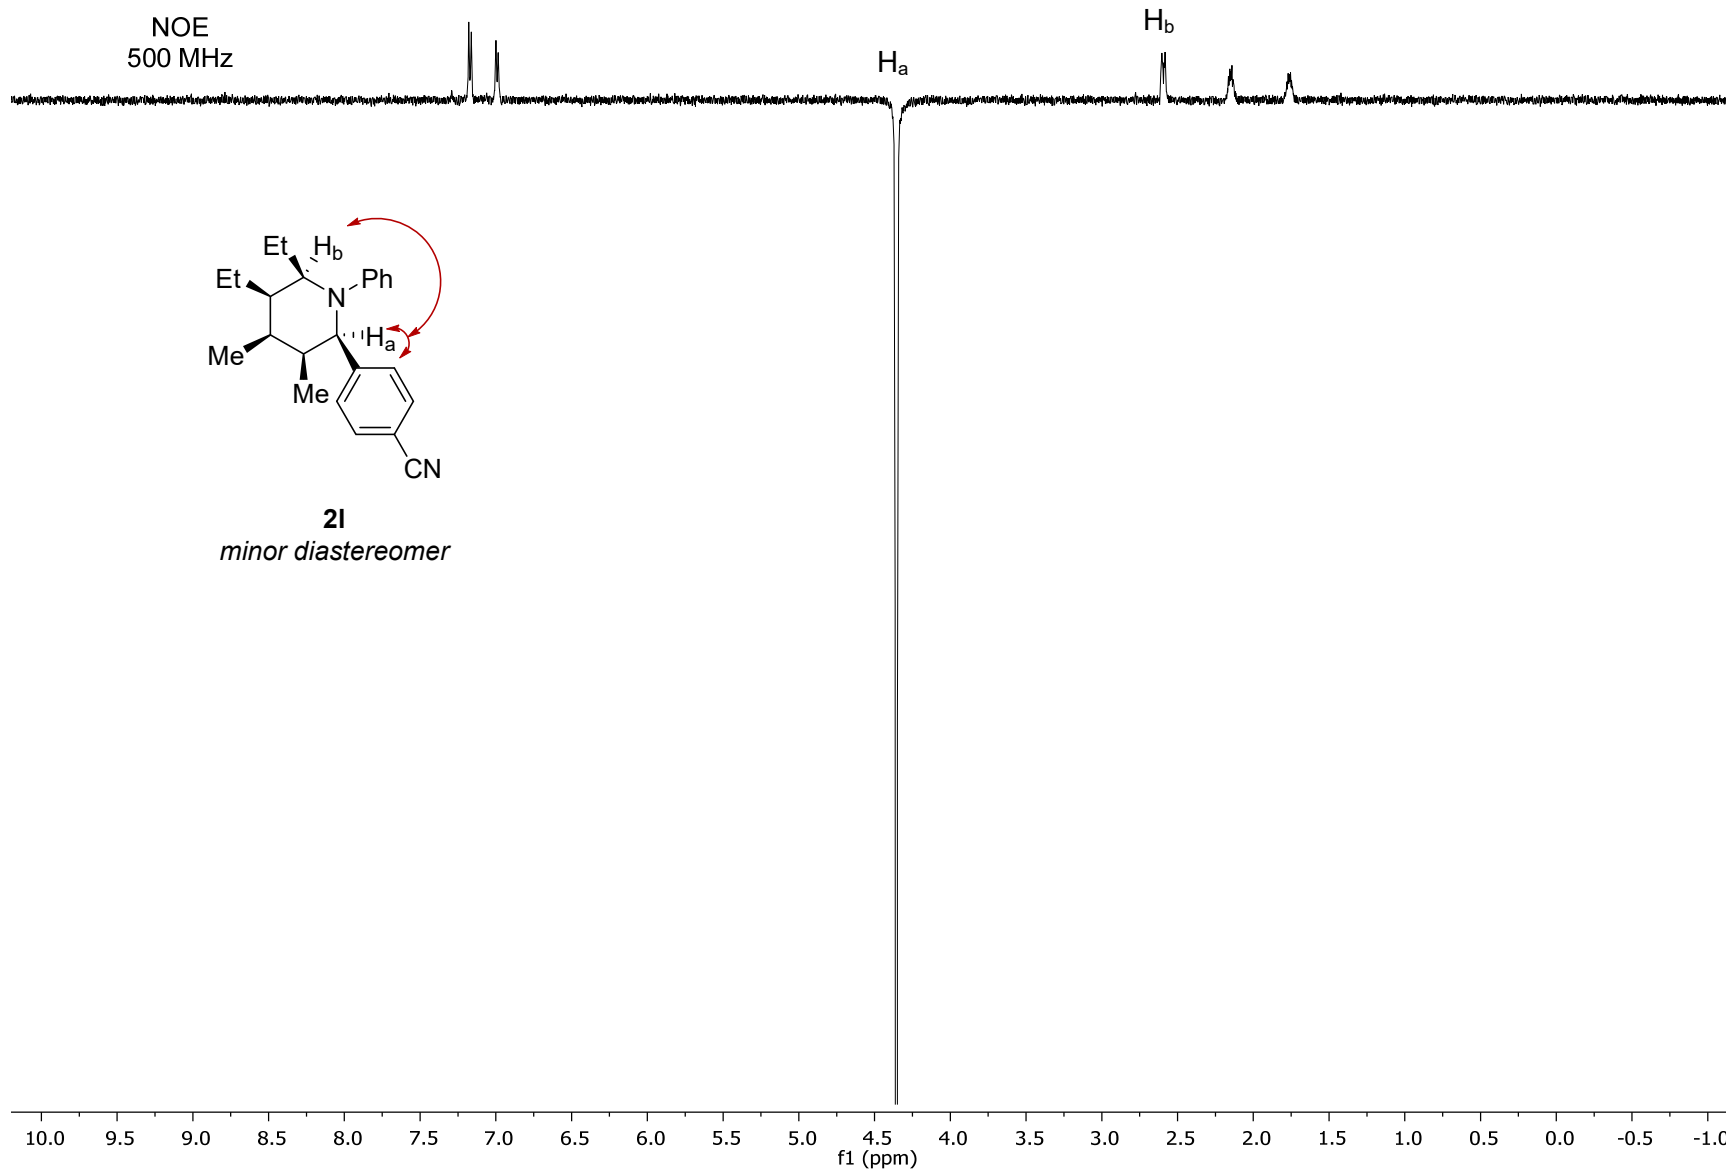

NOE  
500 MHz

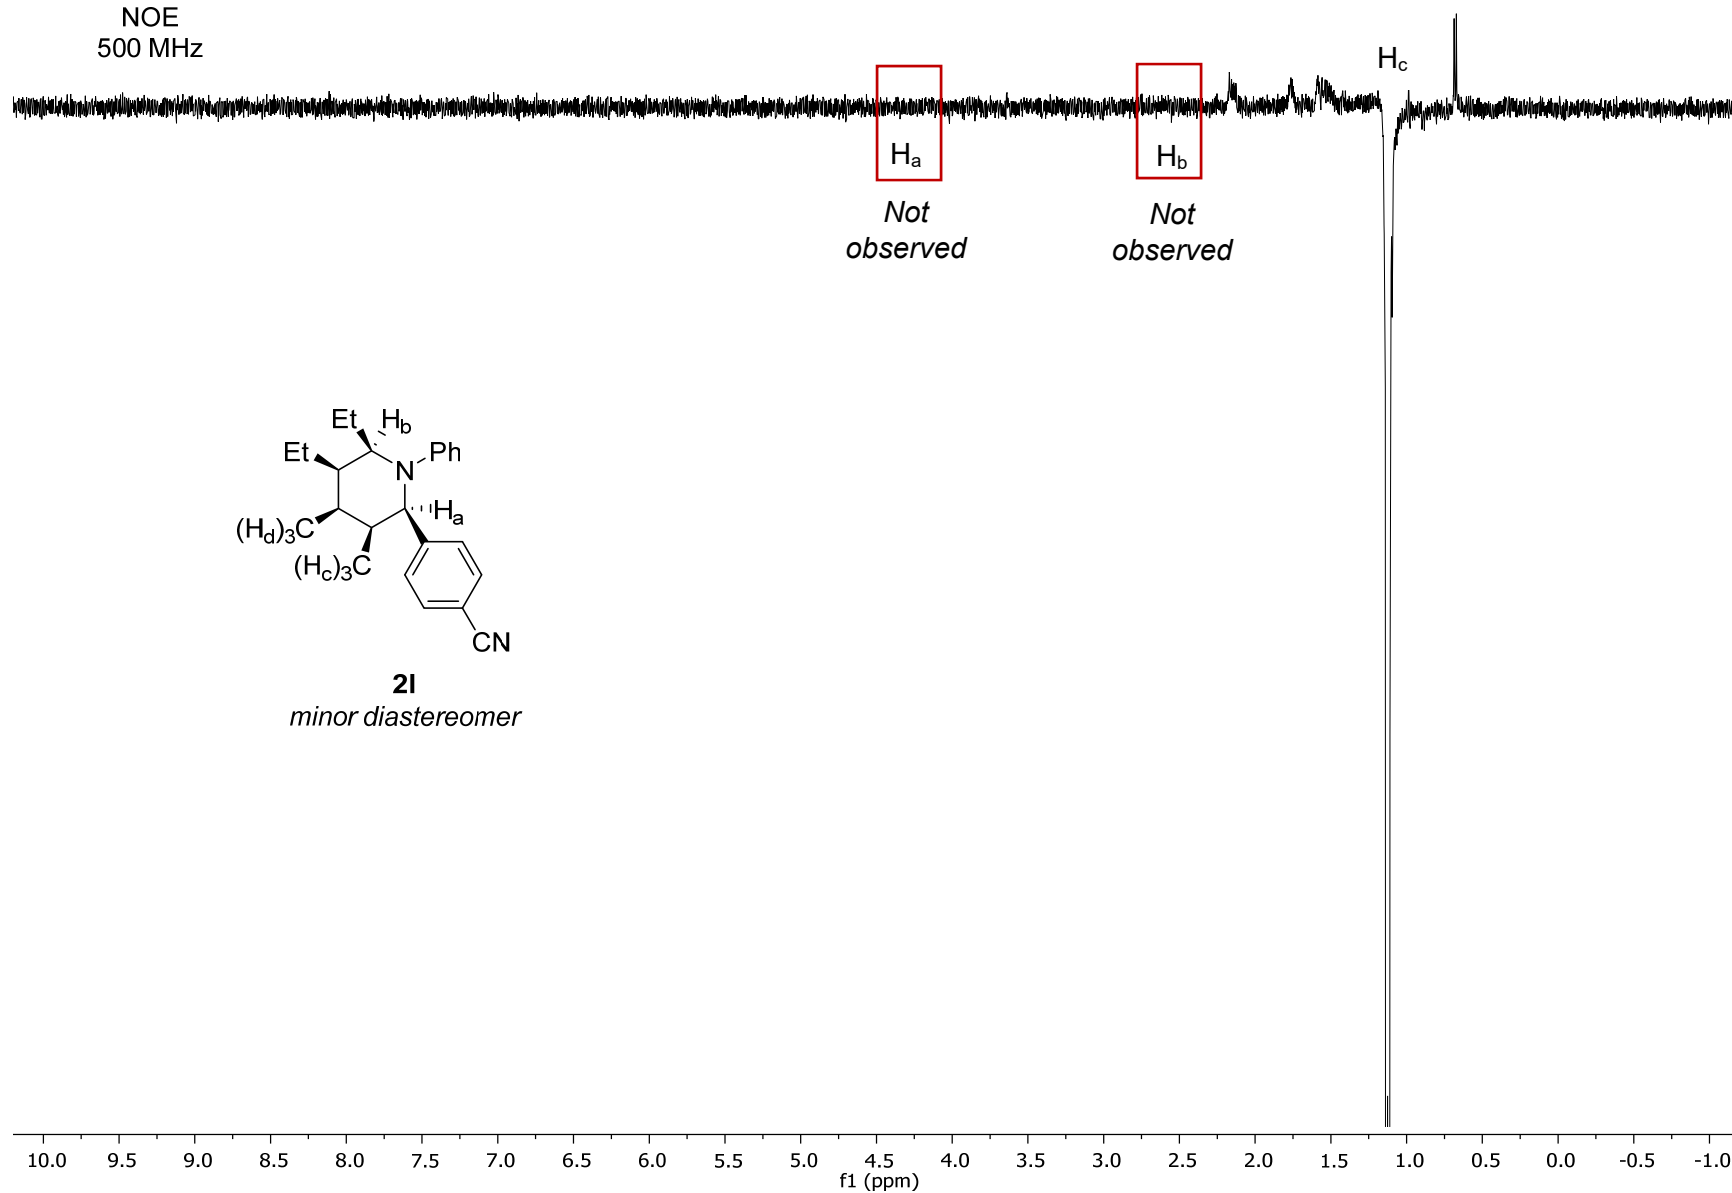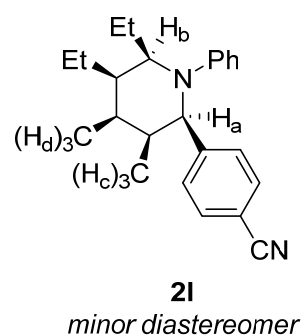

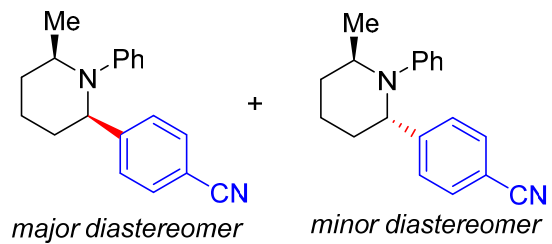

**2m**  
**Isolated mixture**  
 $^1\text{H NMR} - \text{CDCl}_3$   
**600 MHz**

4.41  
4.41  
4.39  
4.39

2.92  
2.92  
2.91  
2.91  
2.90  
2.90  
2.89  
2.89  
2.88  
2.88  
2.87

0.96  
0.95  
0.80  
0.79

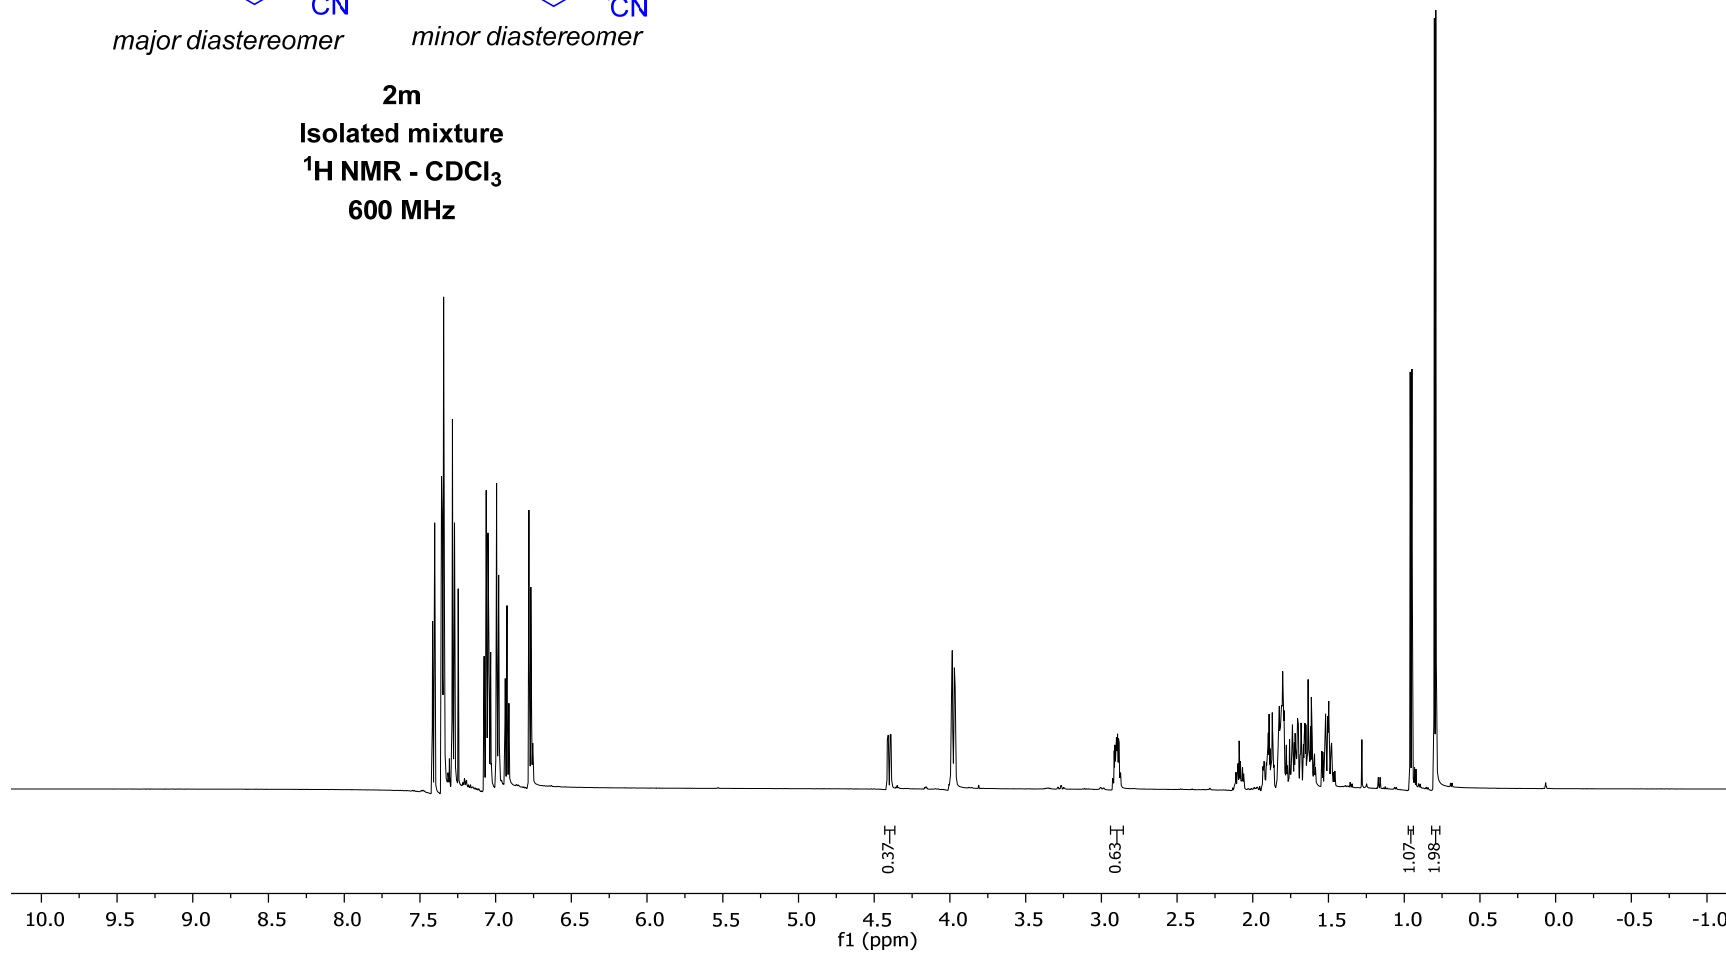

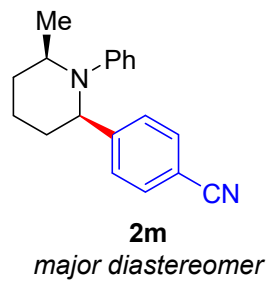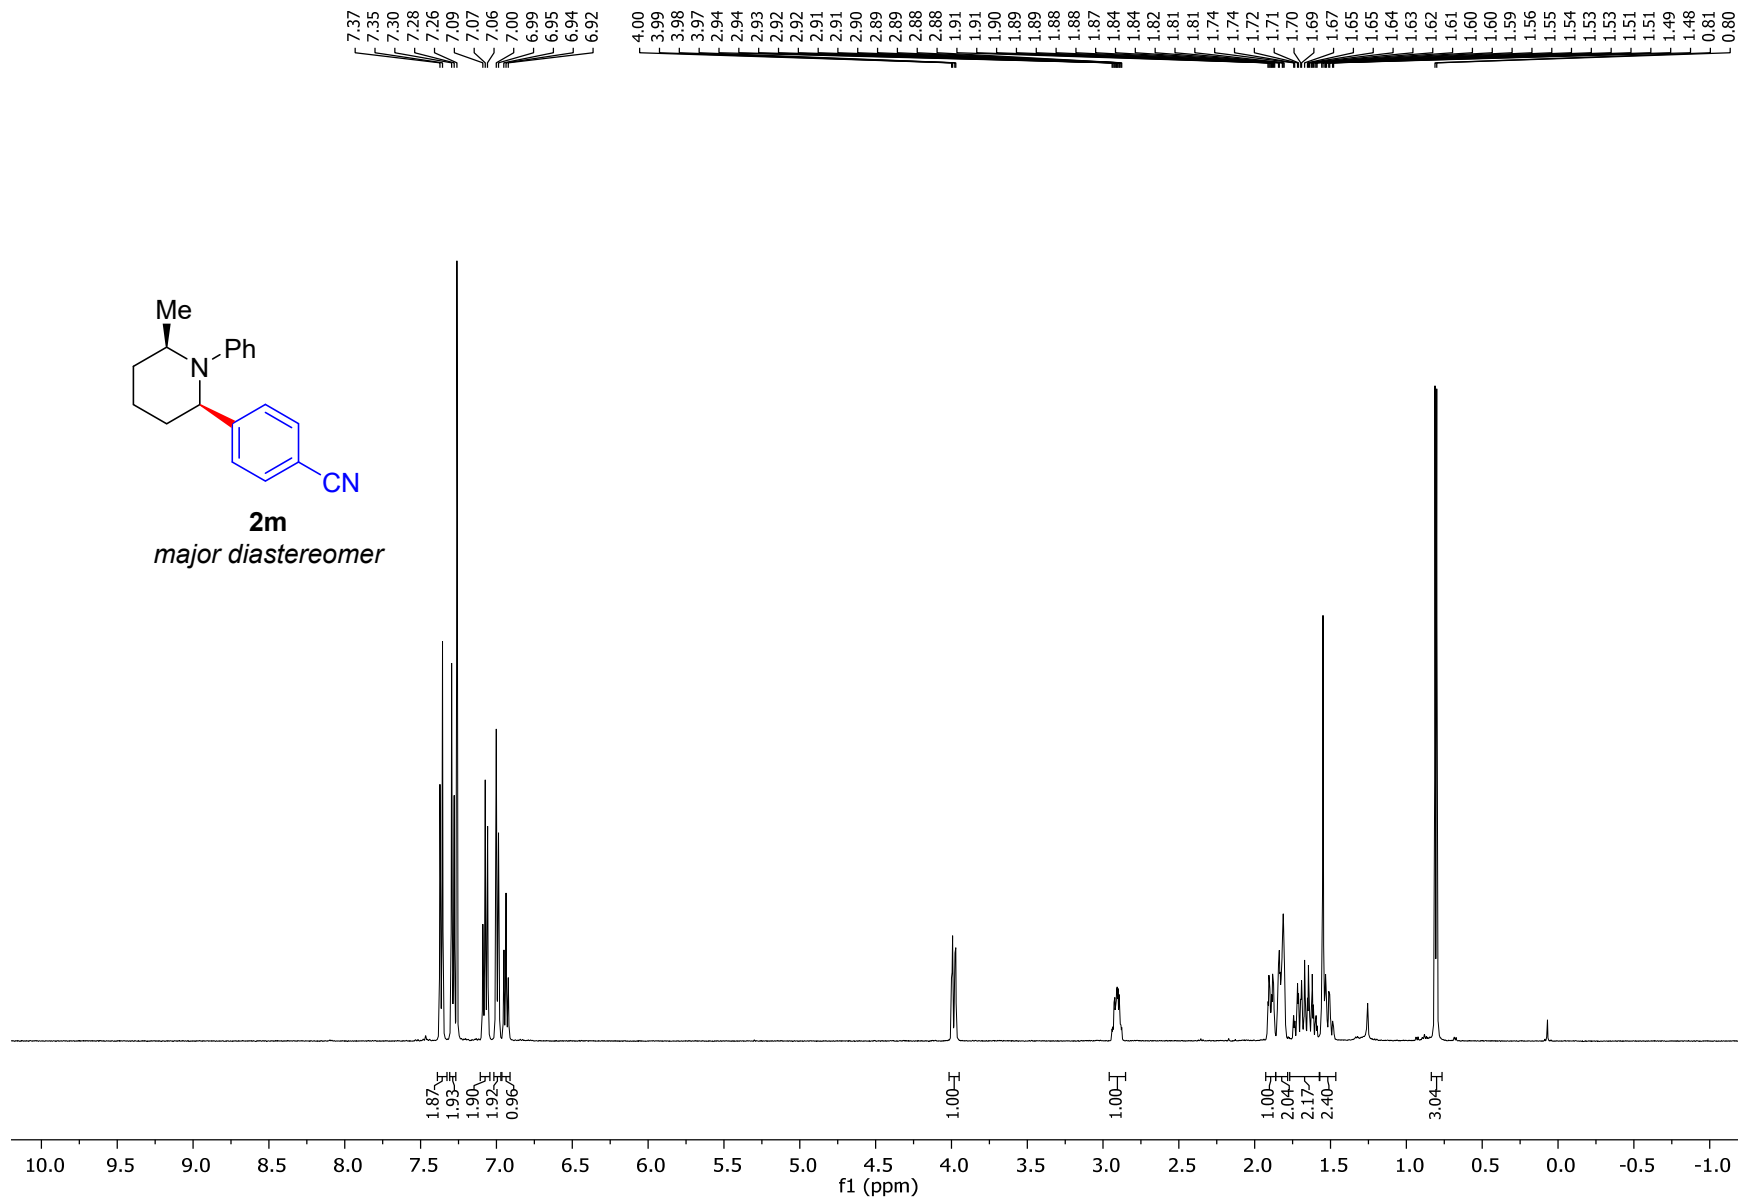

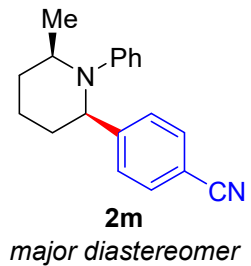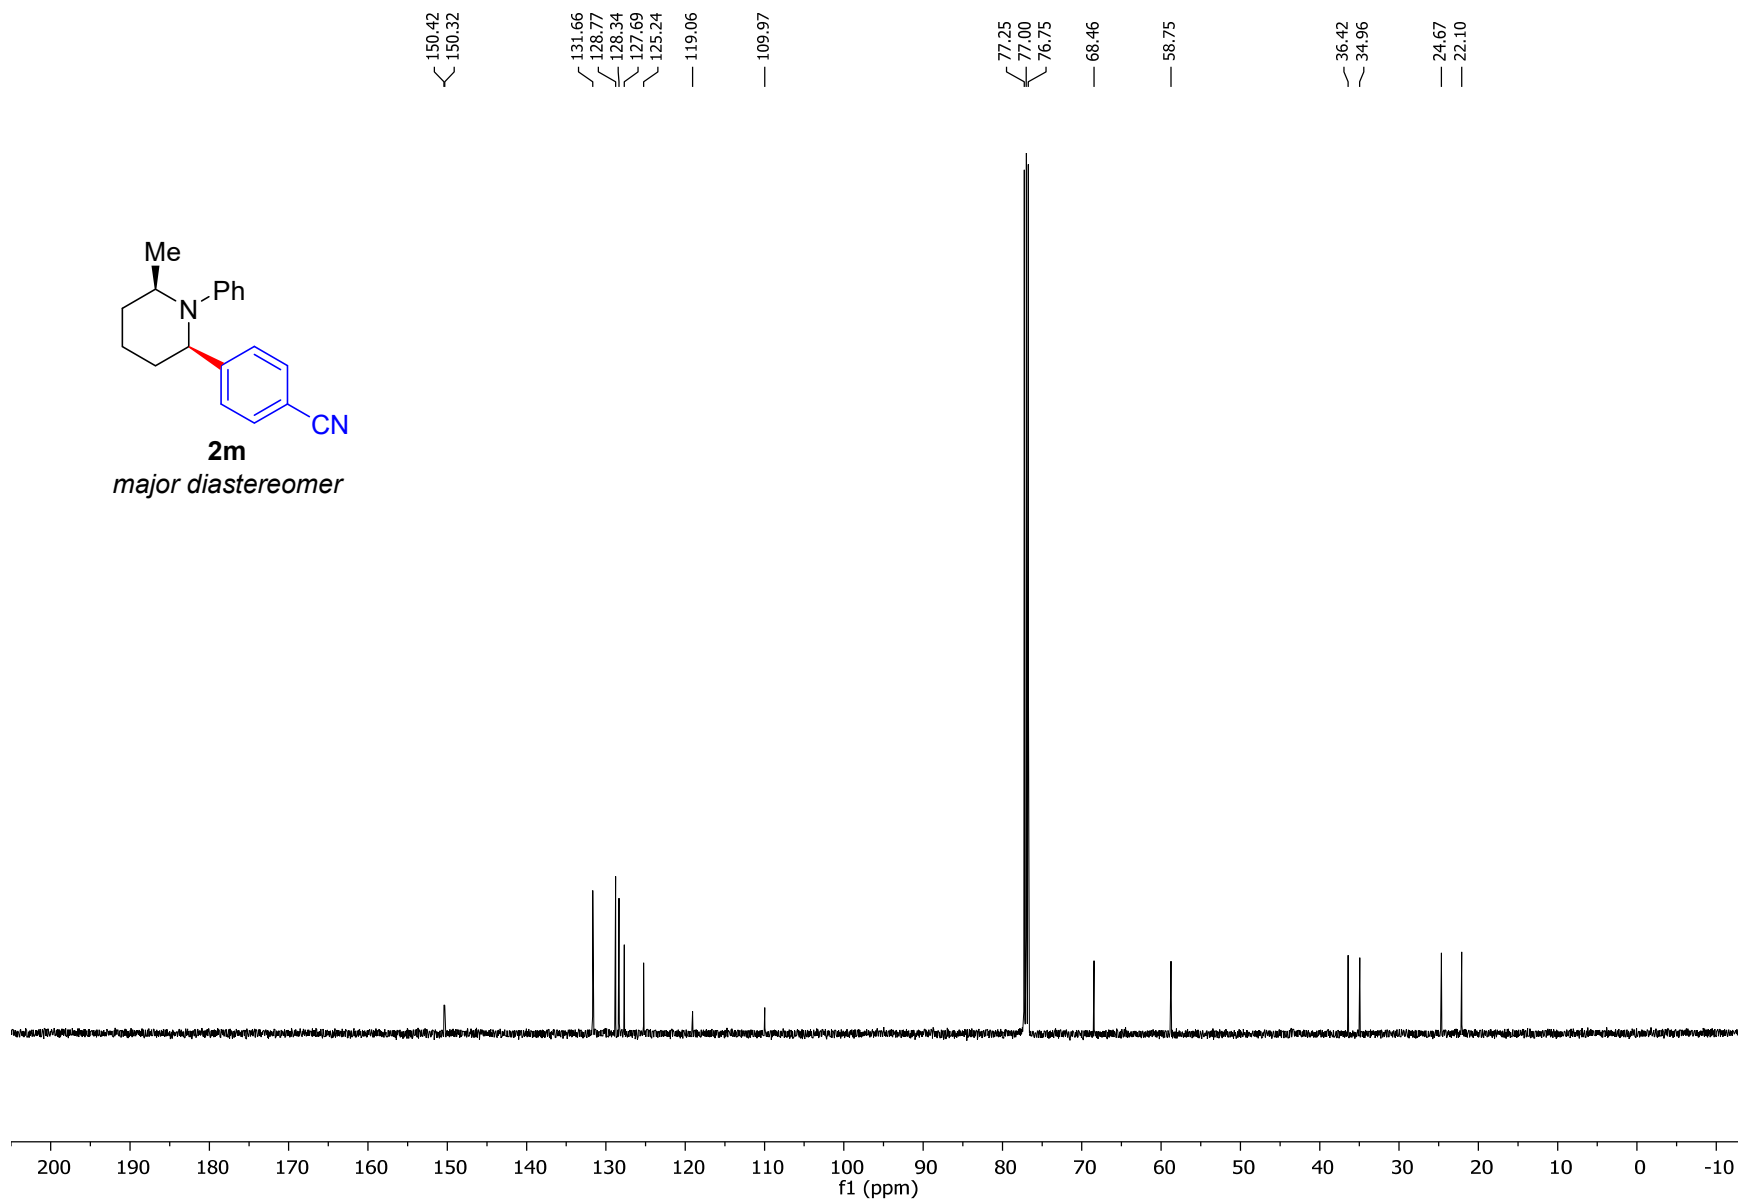



NOE  
500 MHz

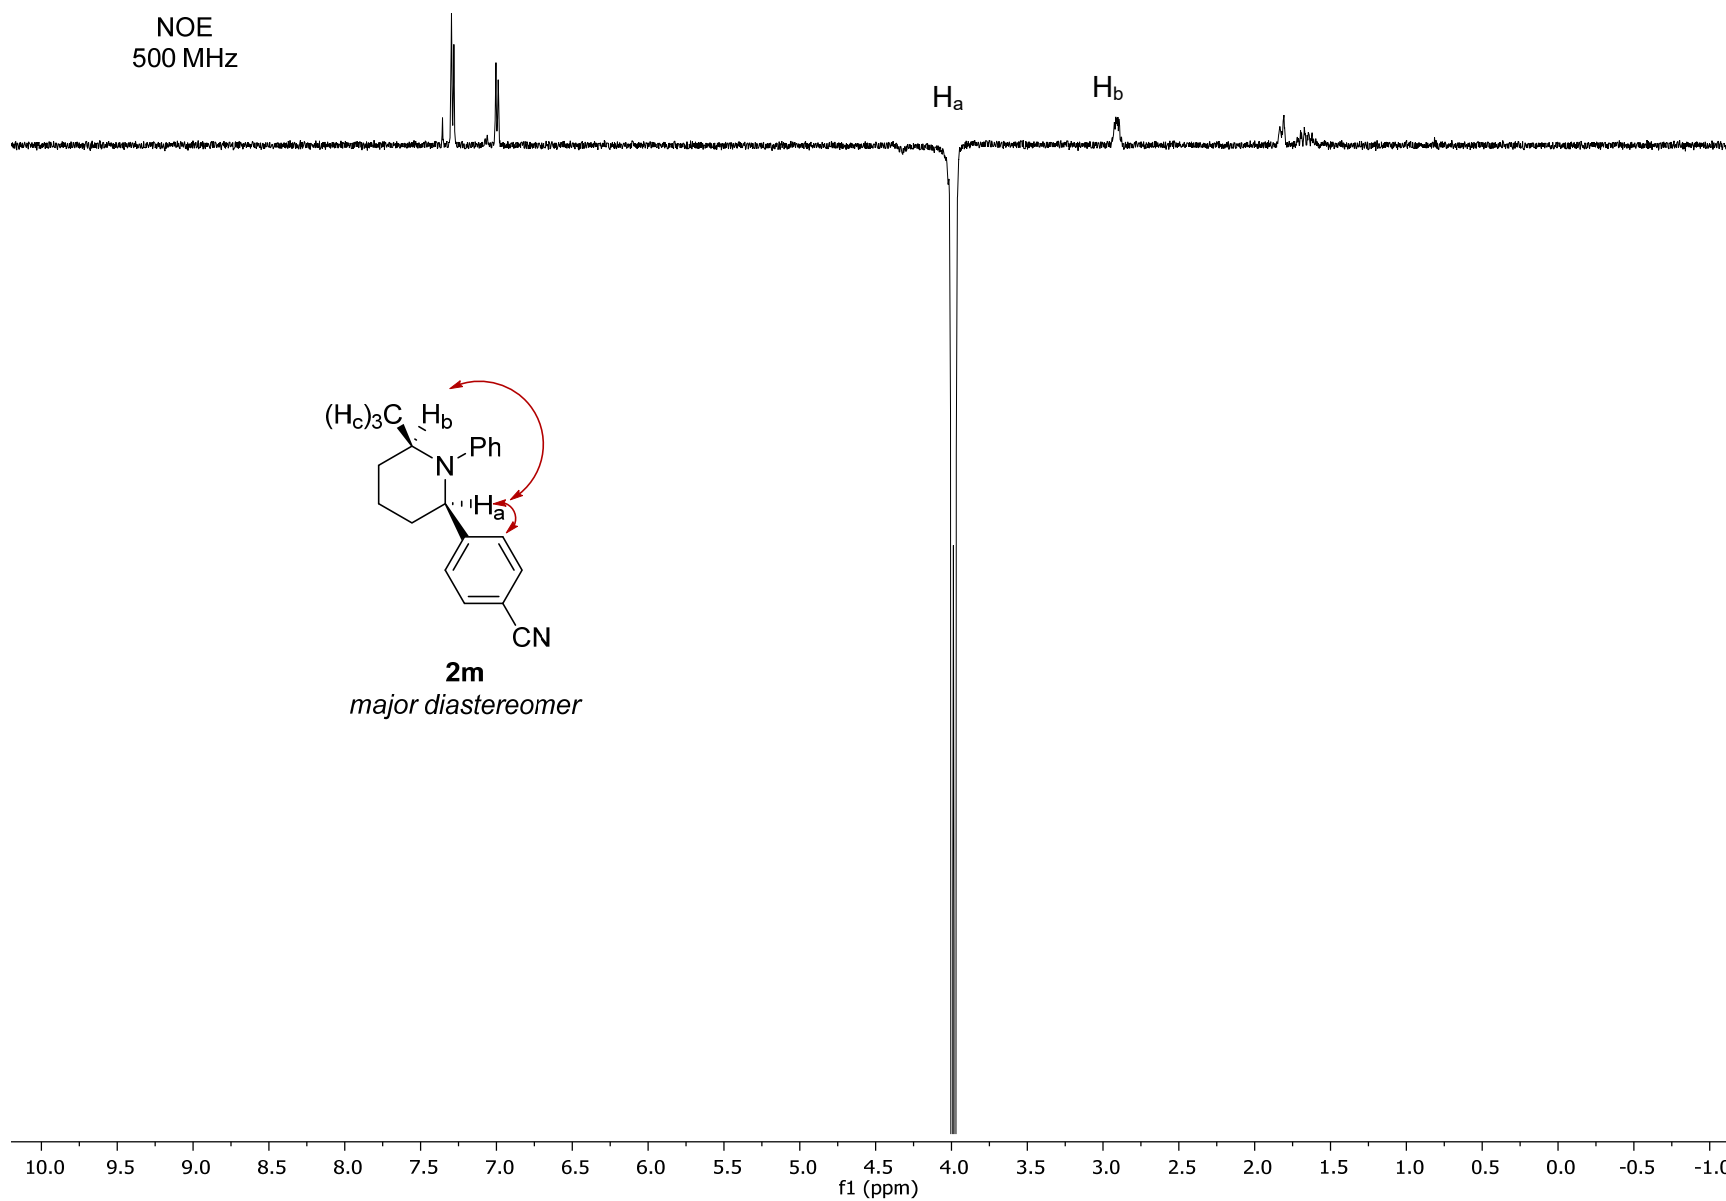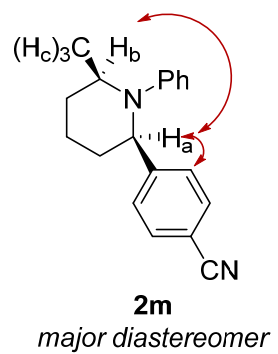

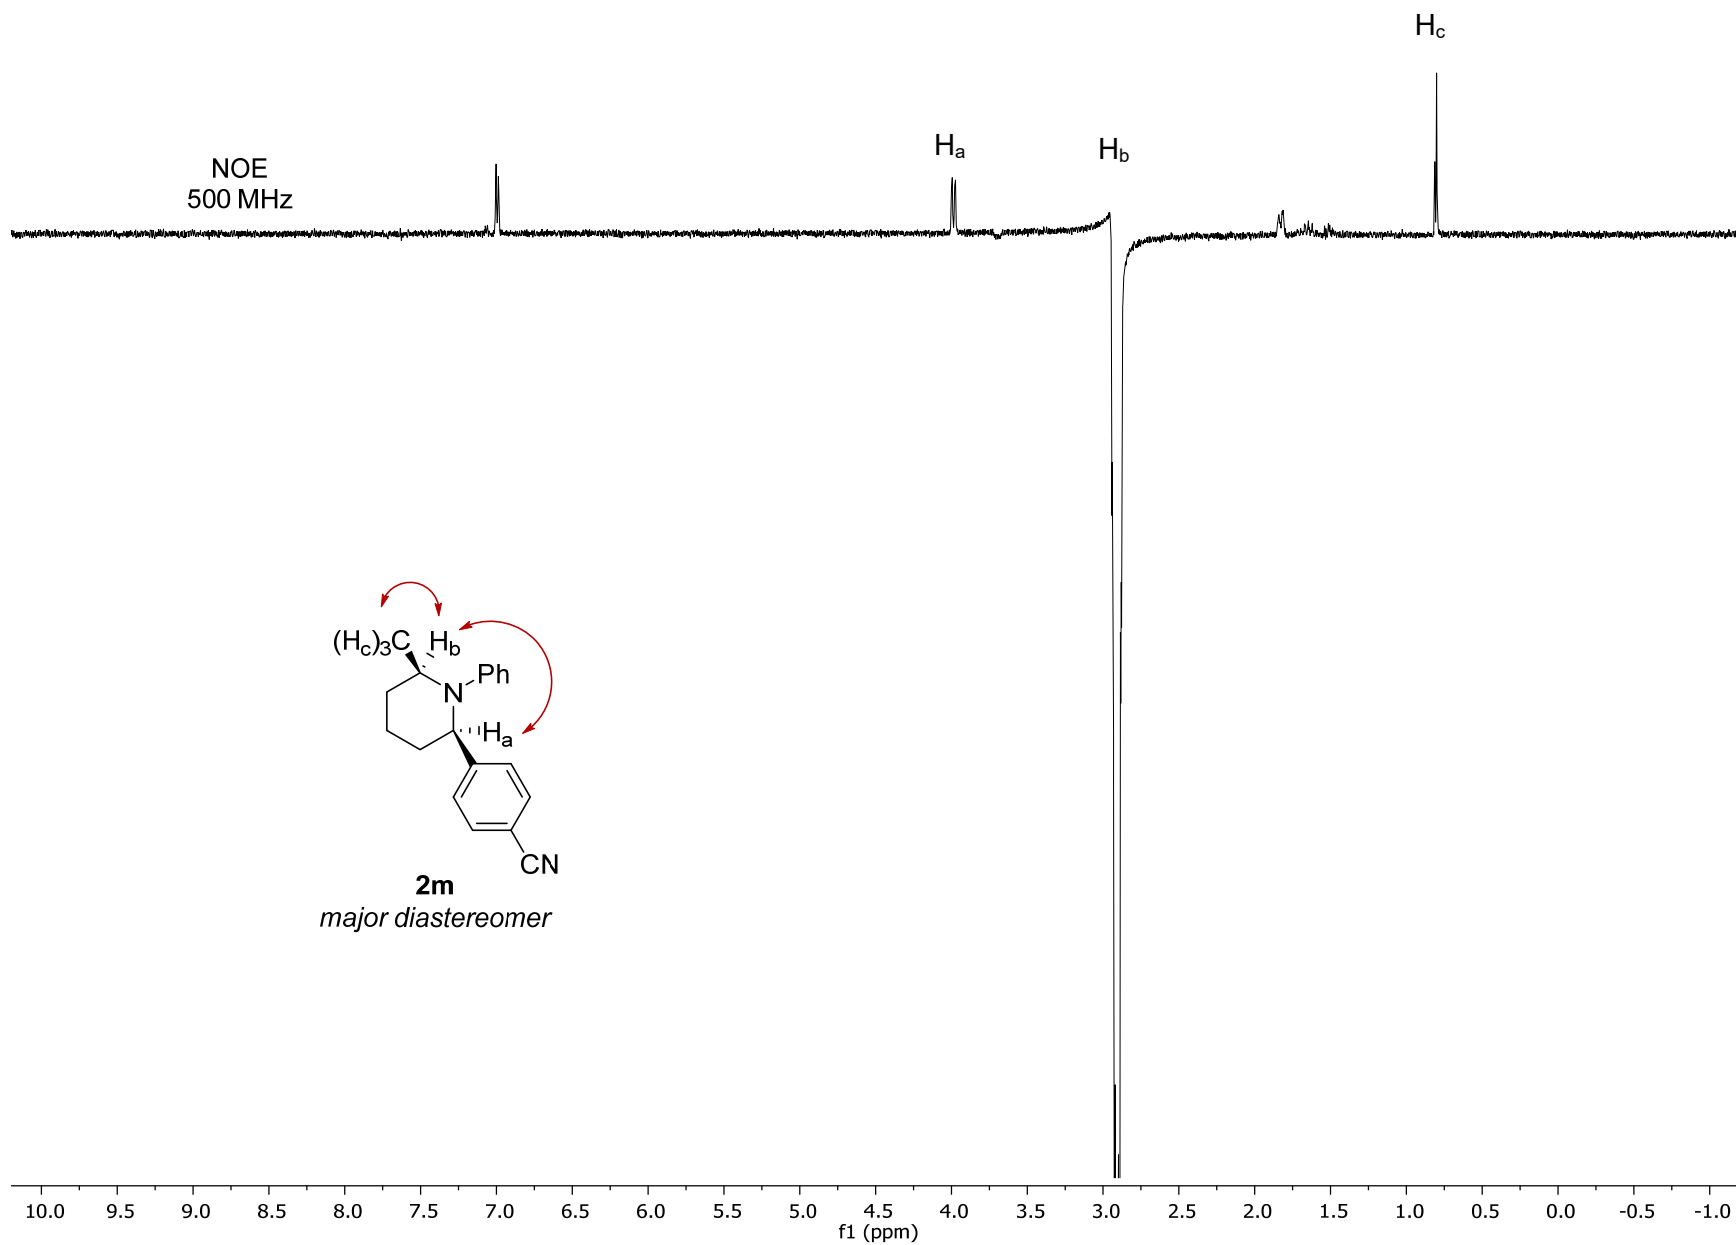

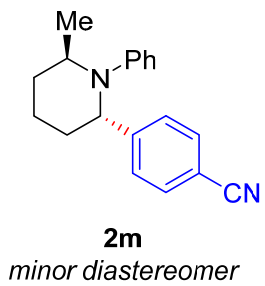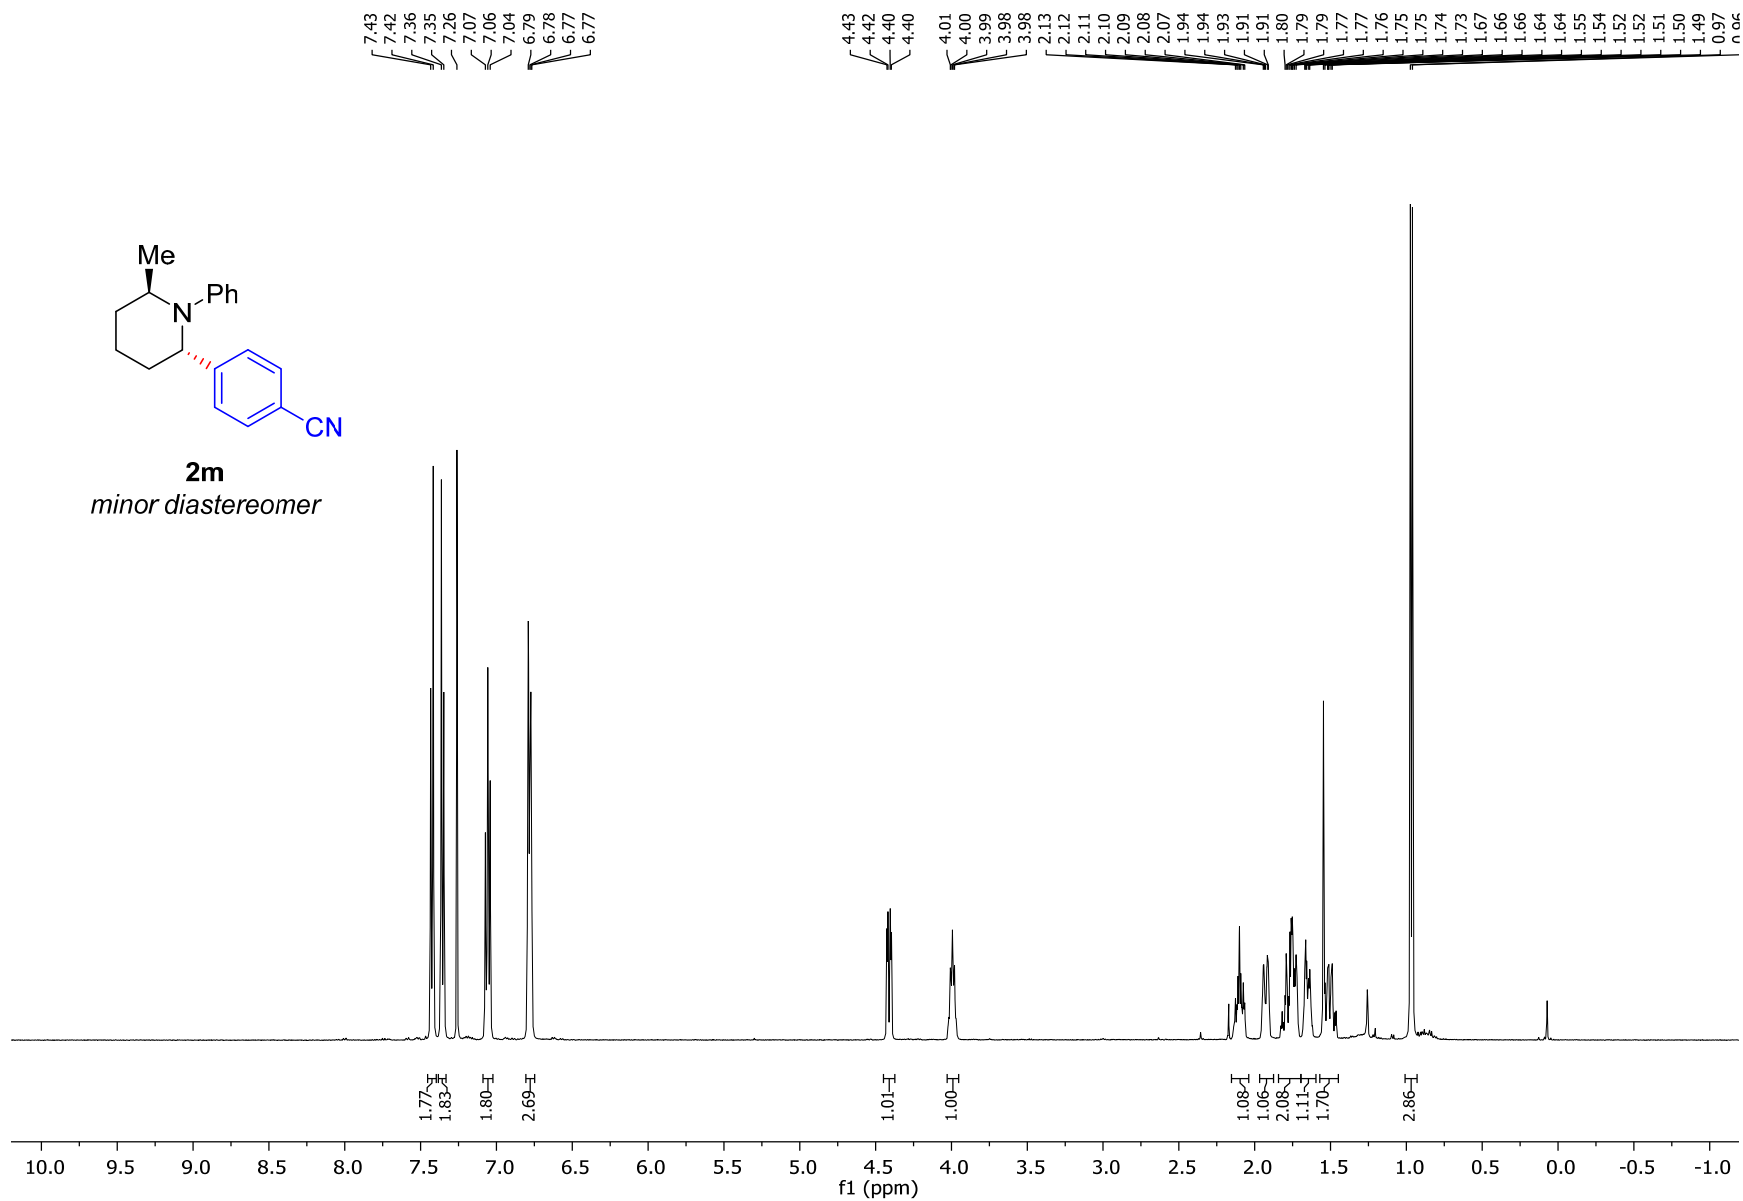

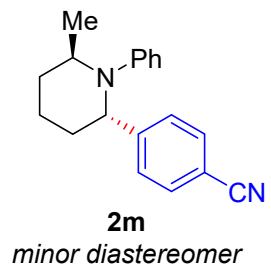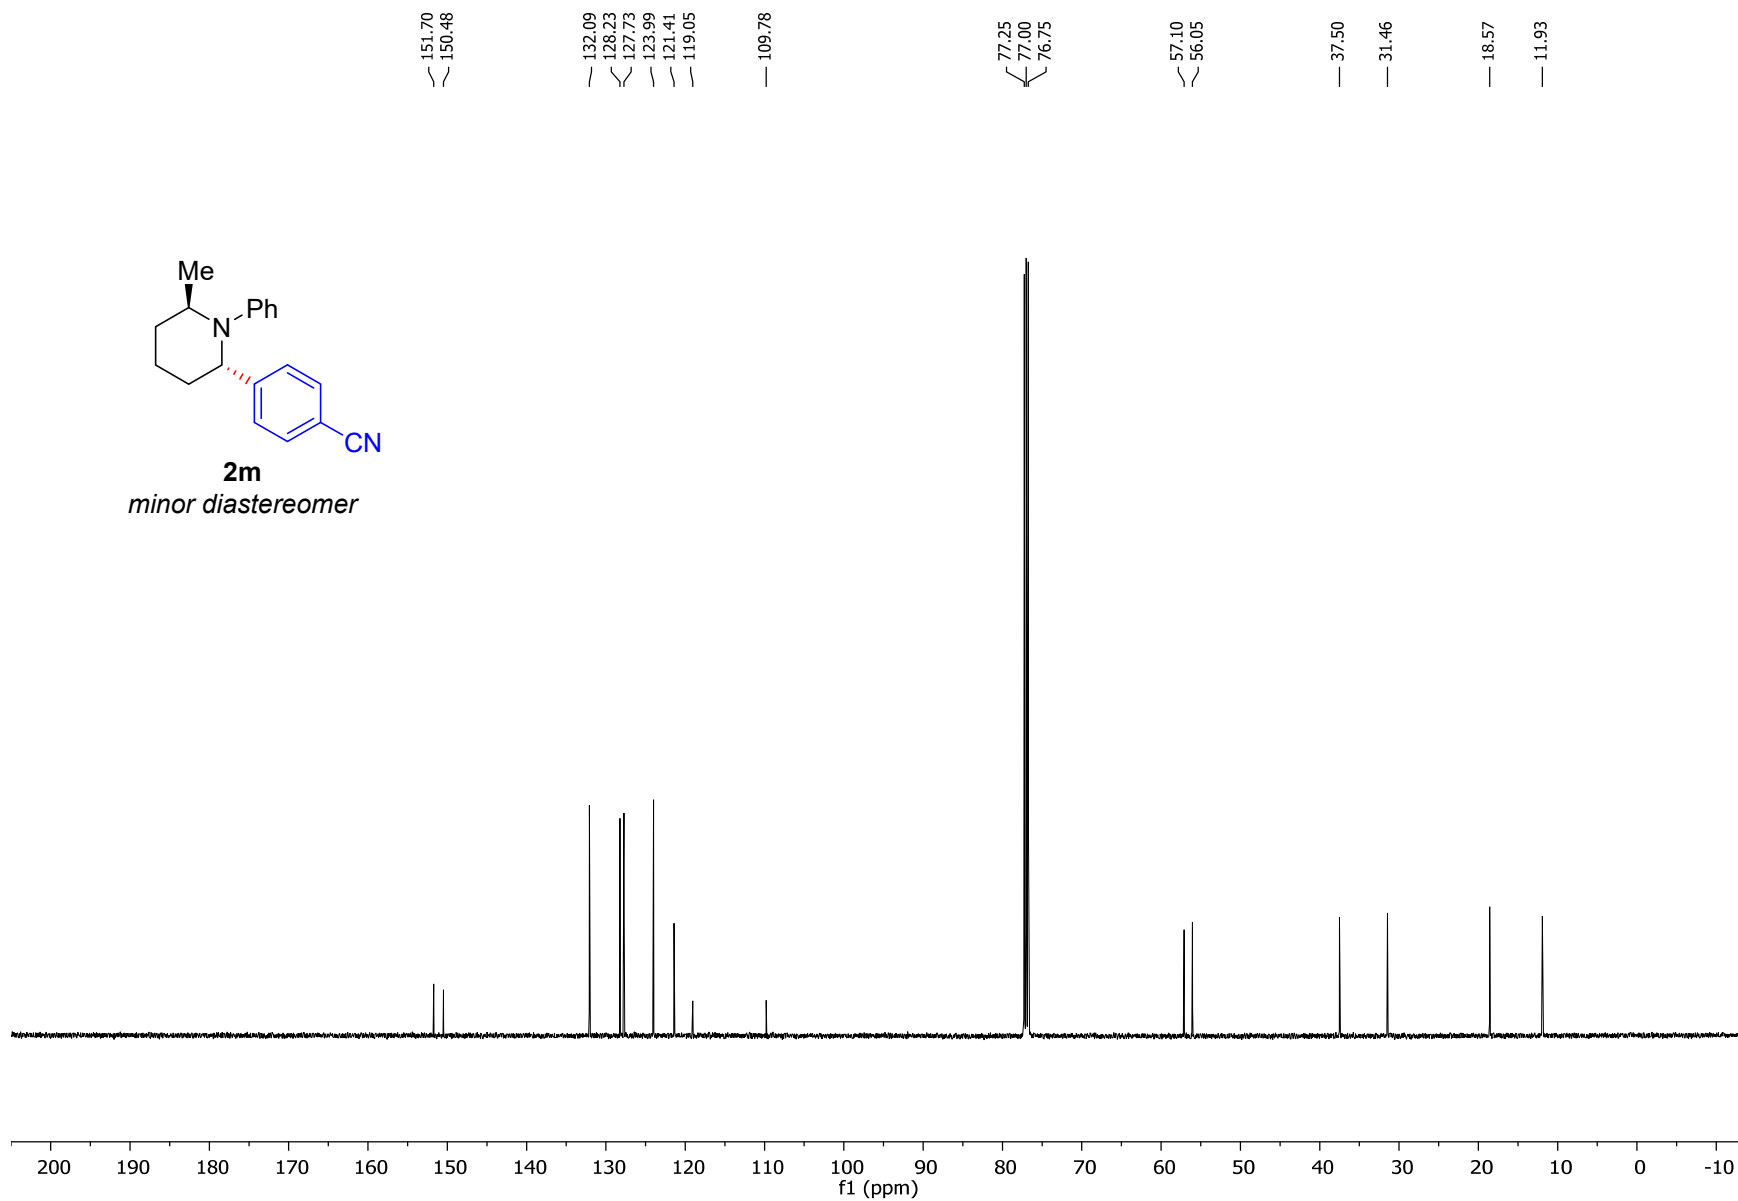

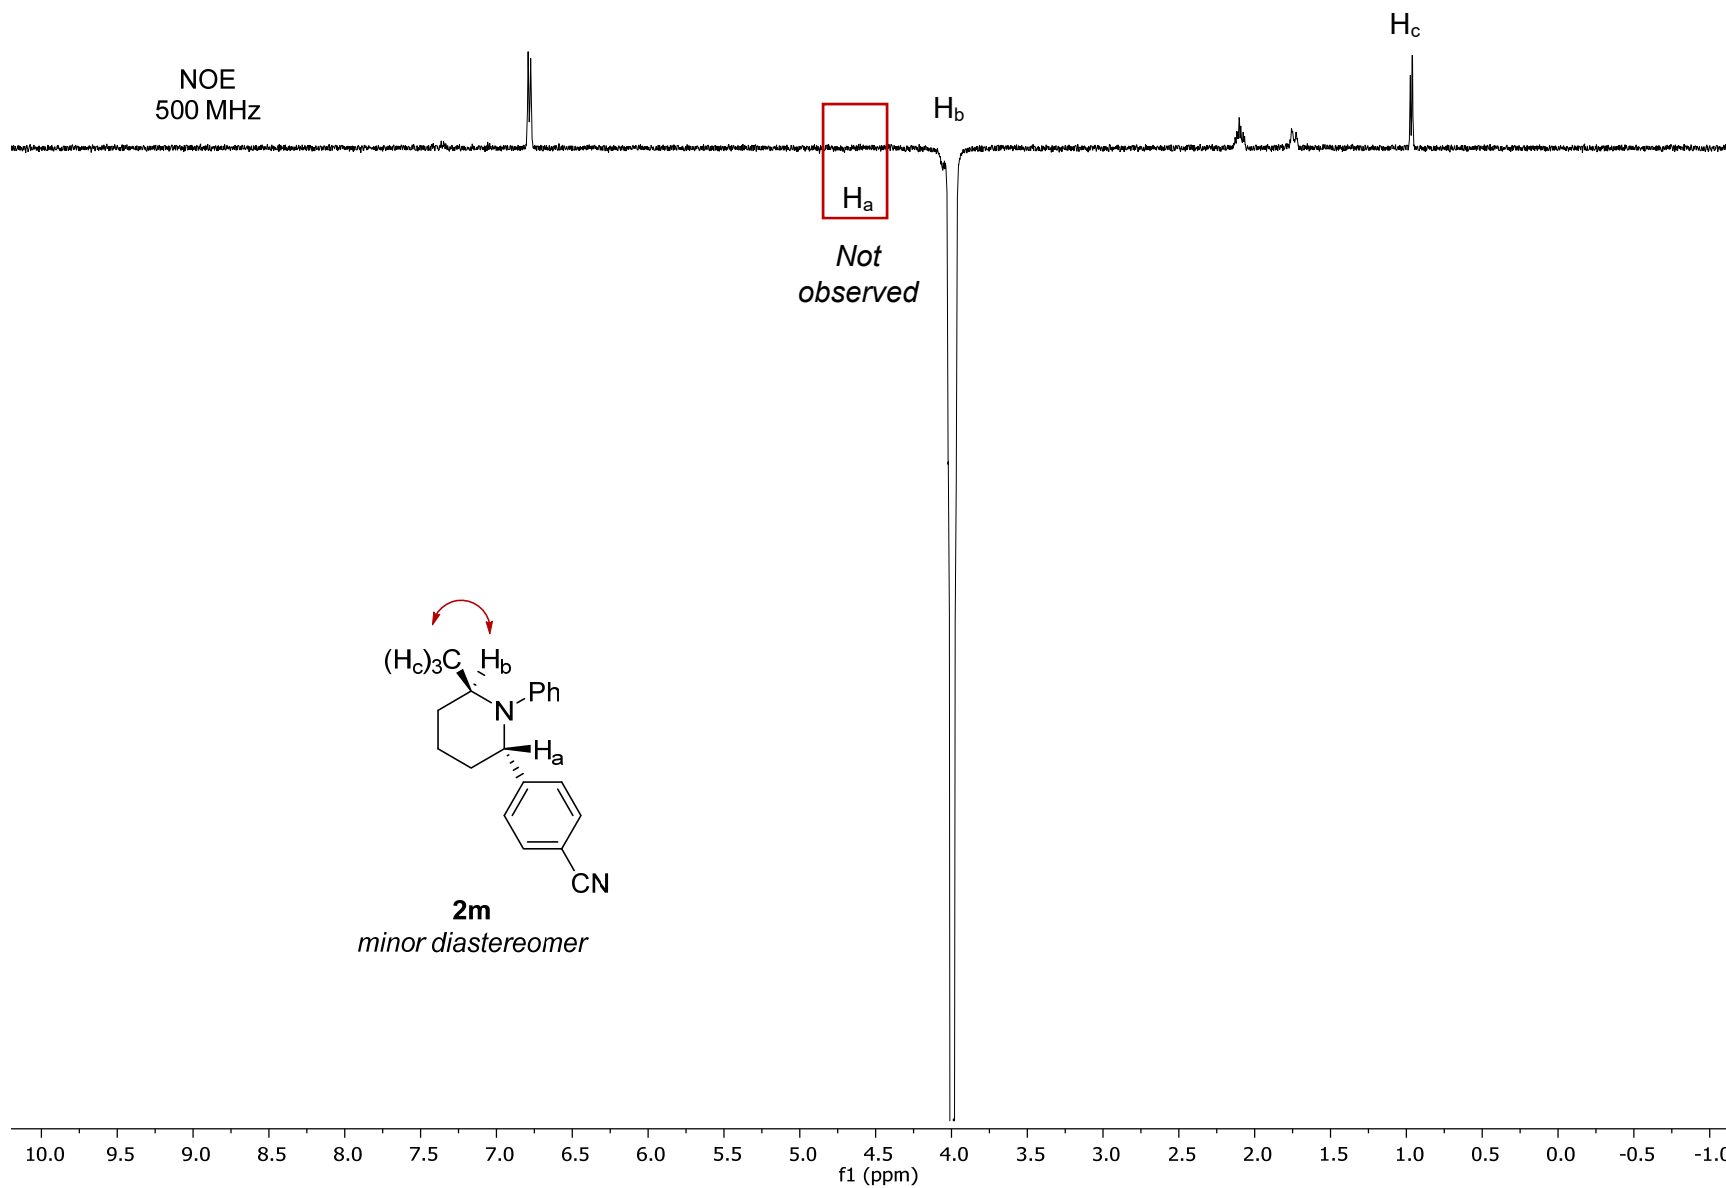

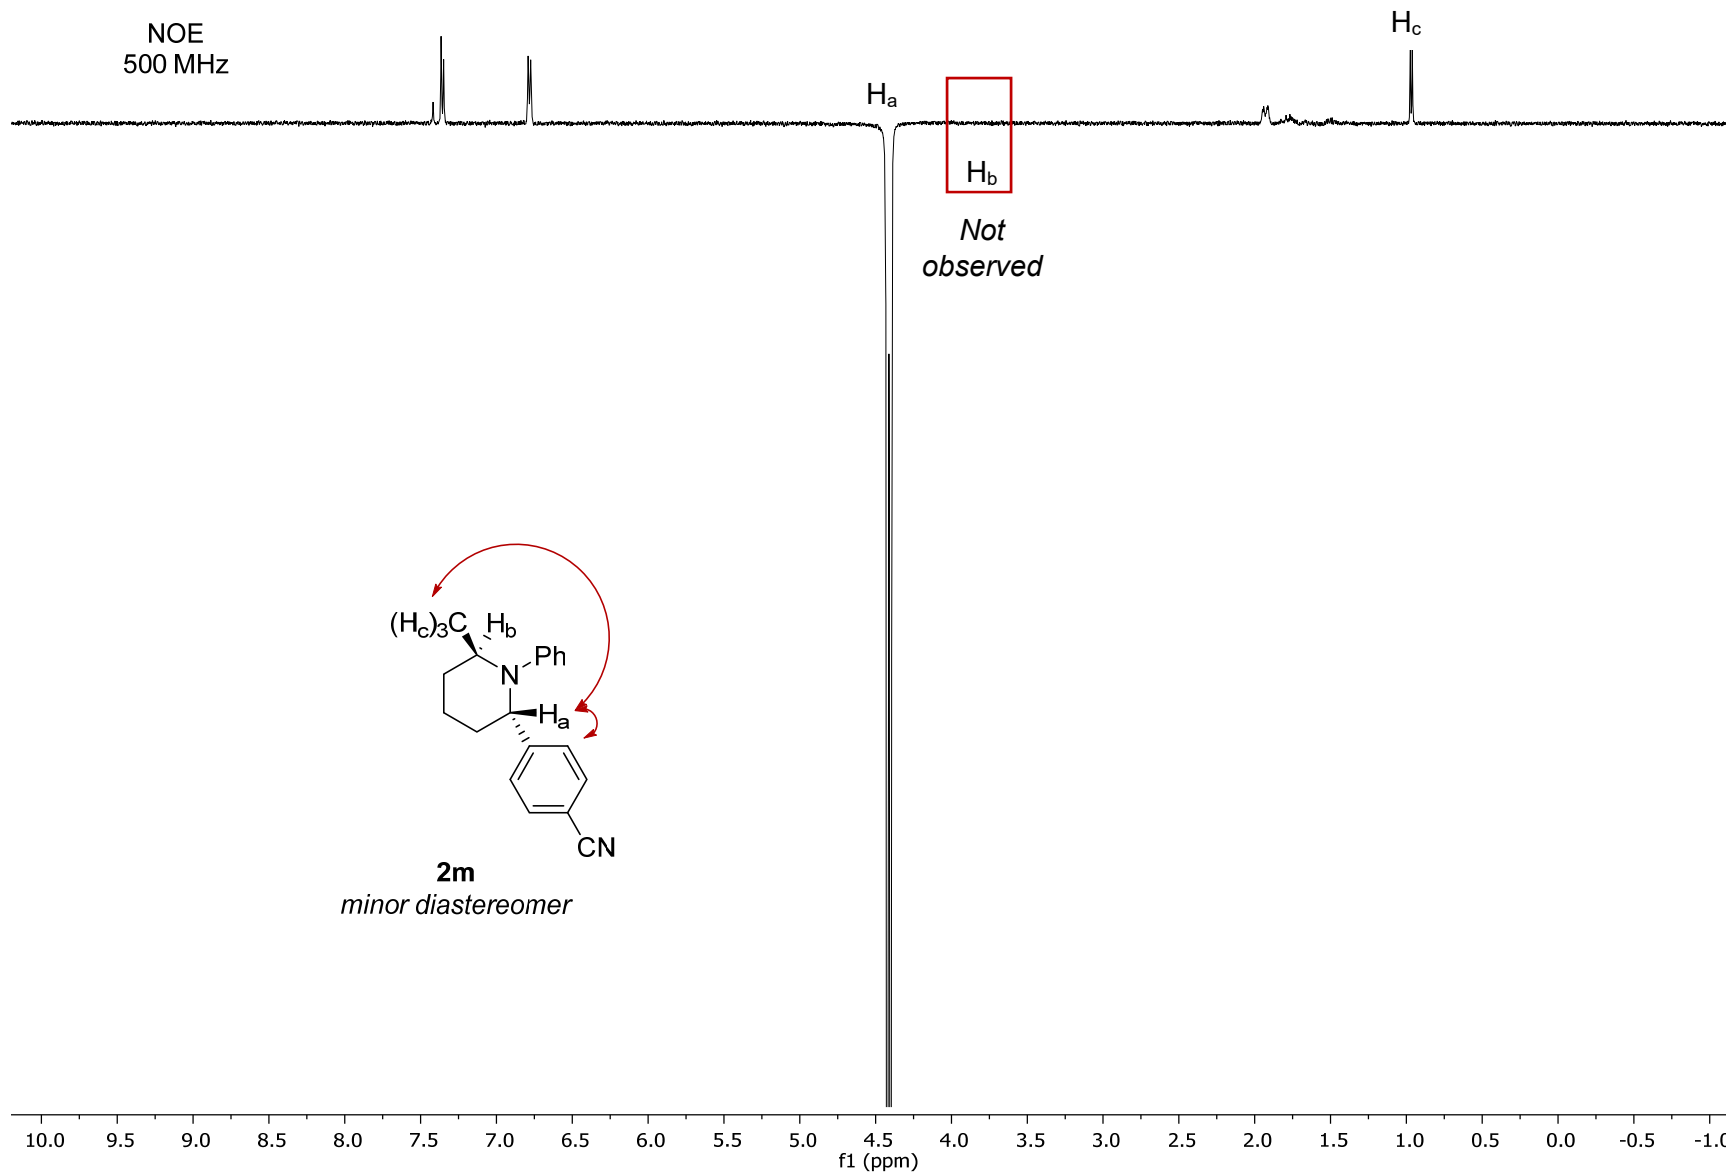

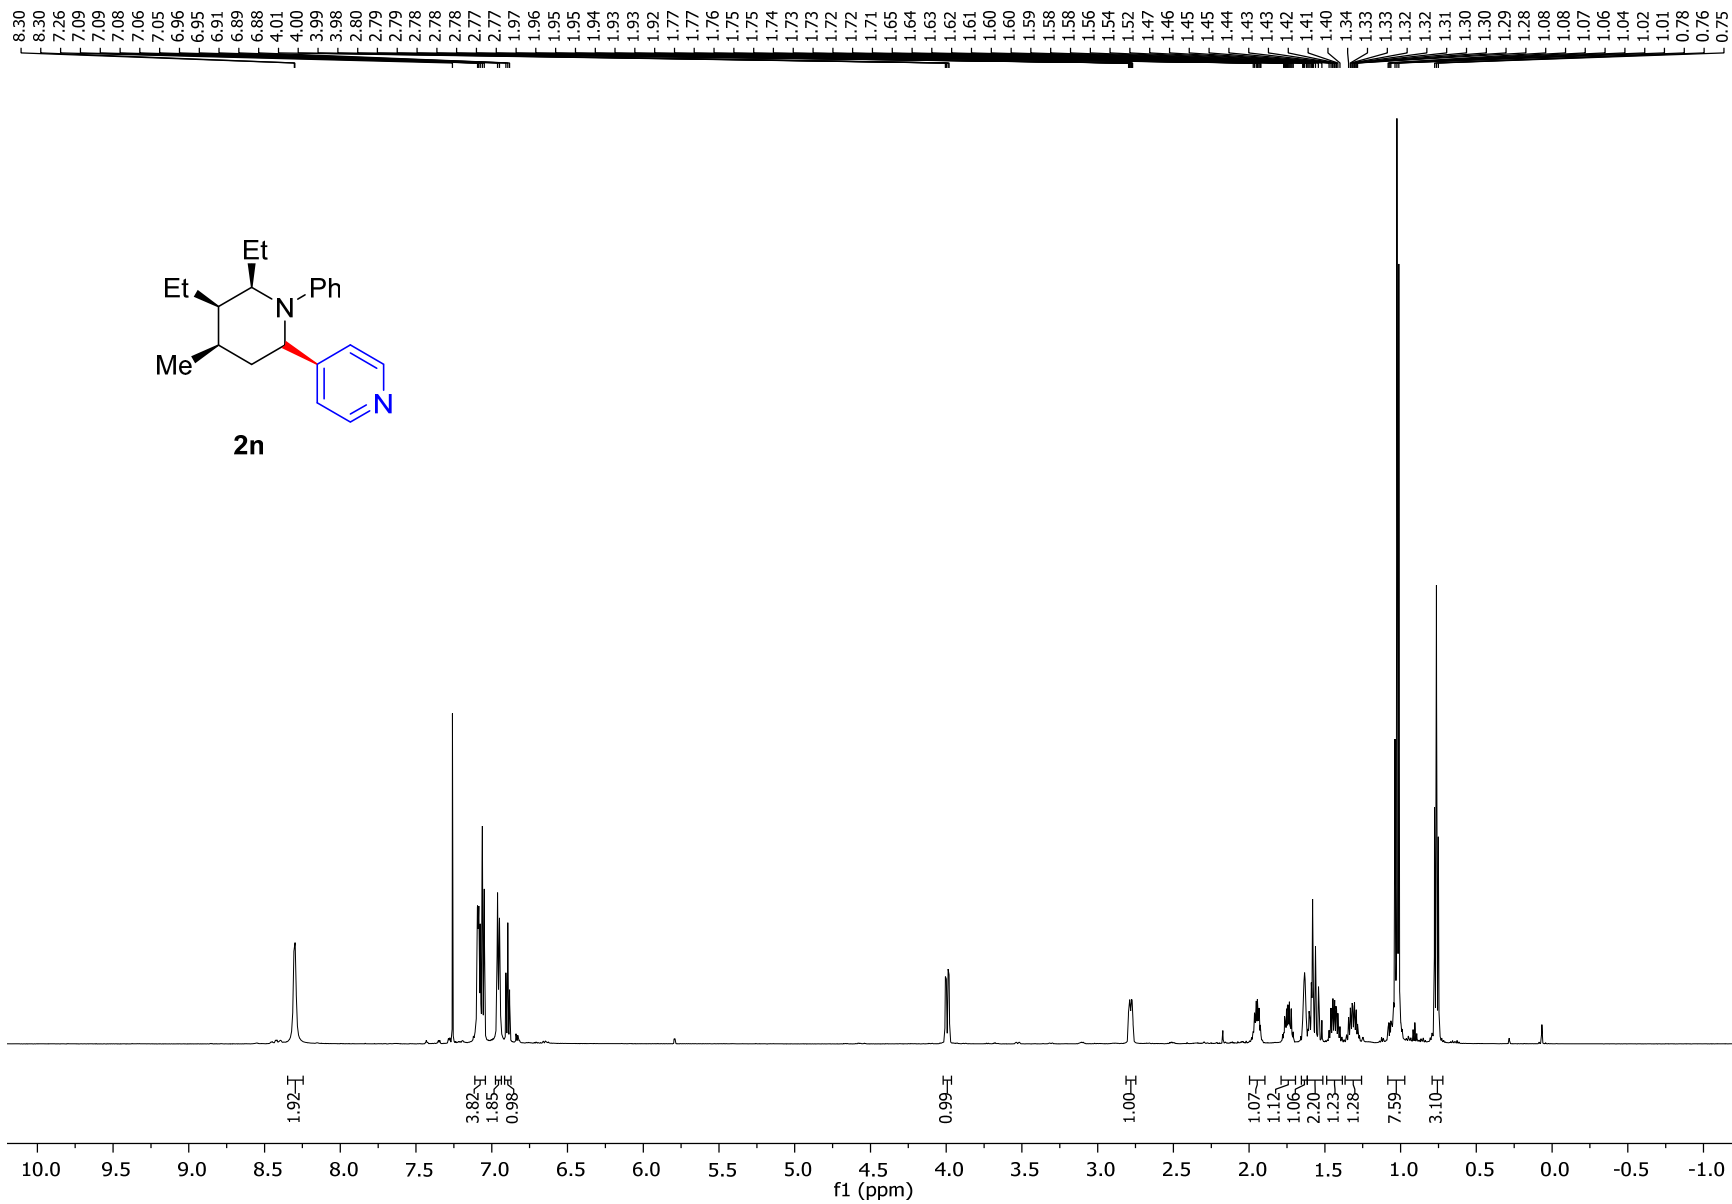

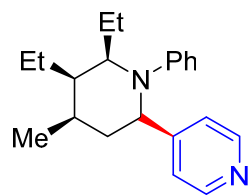

2n

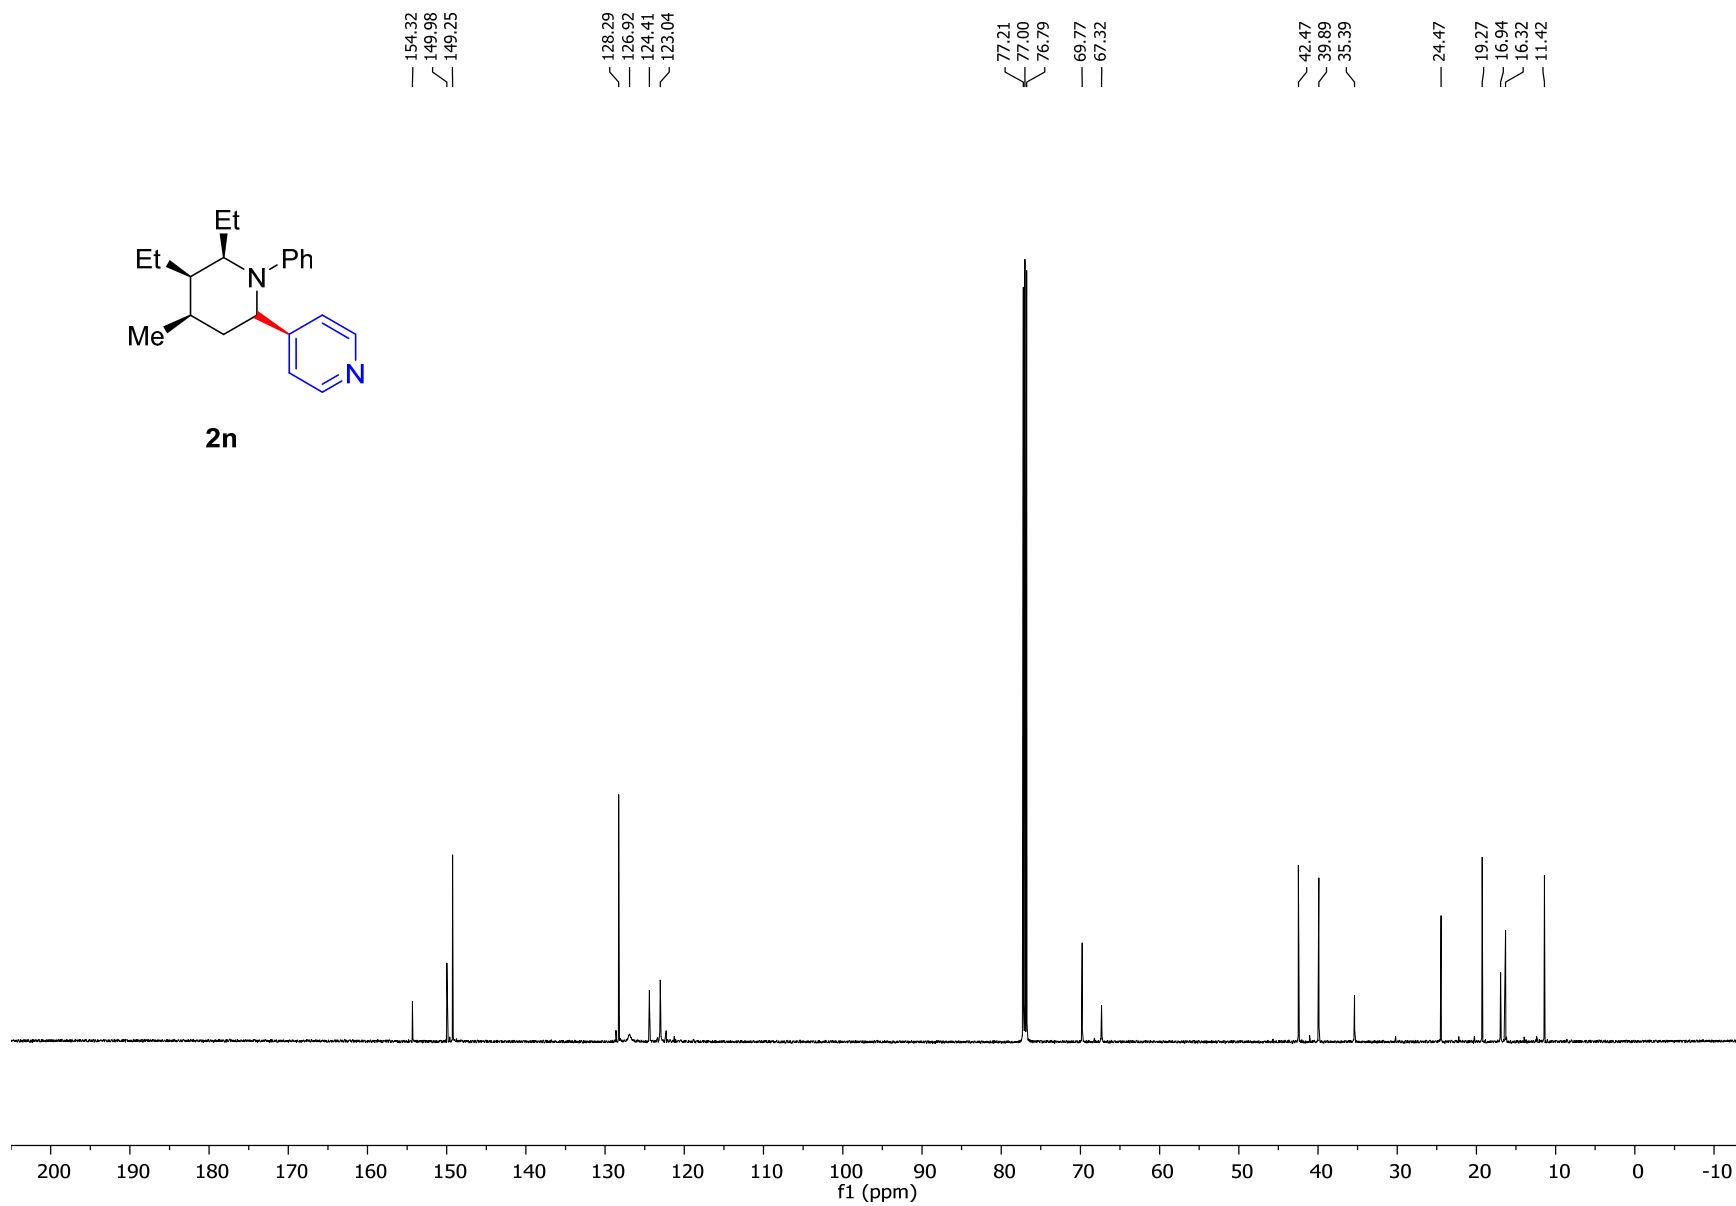



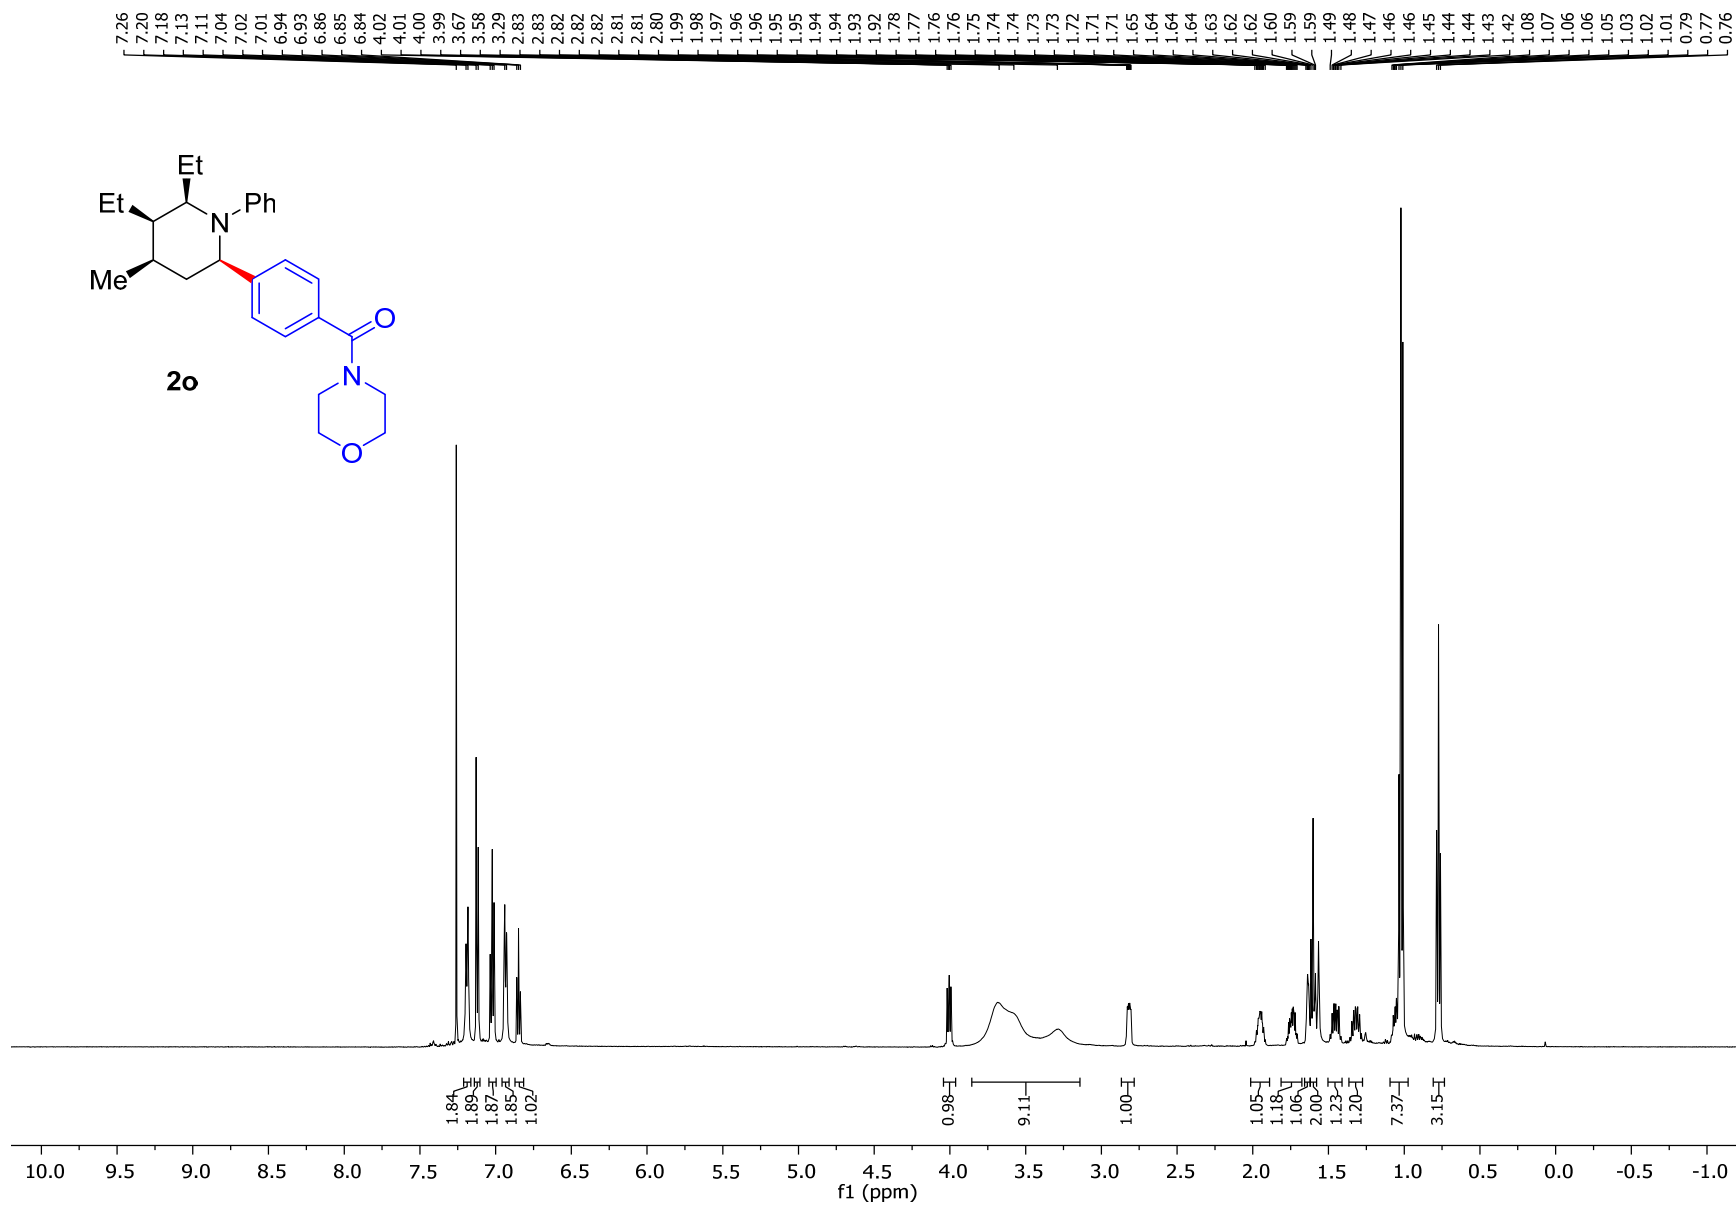

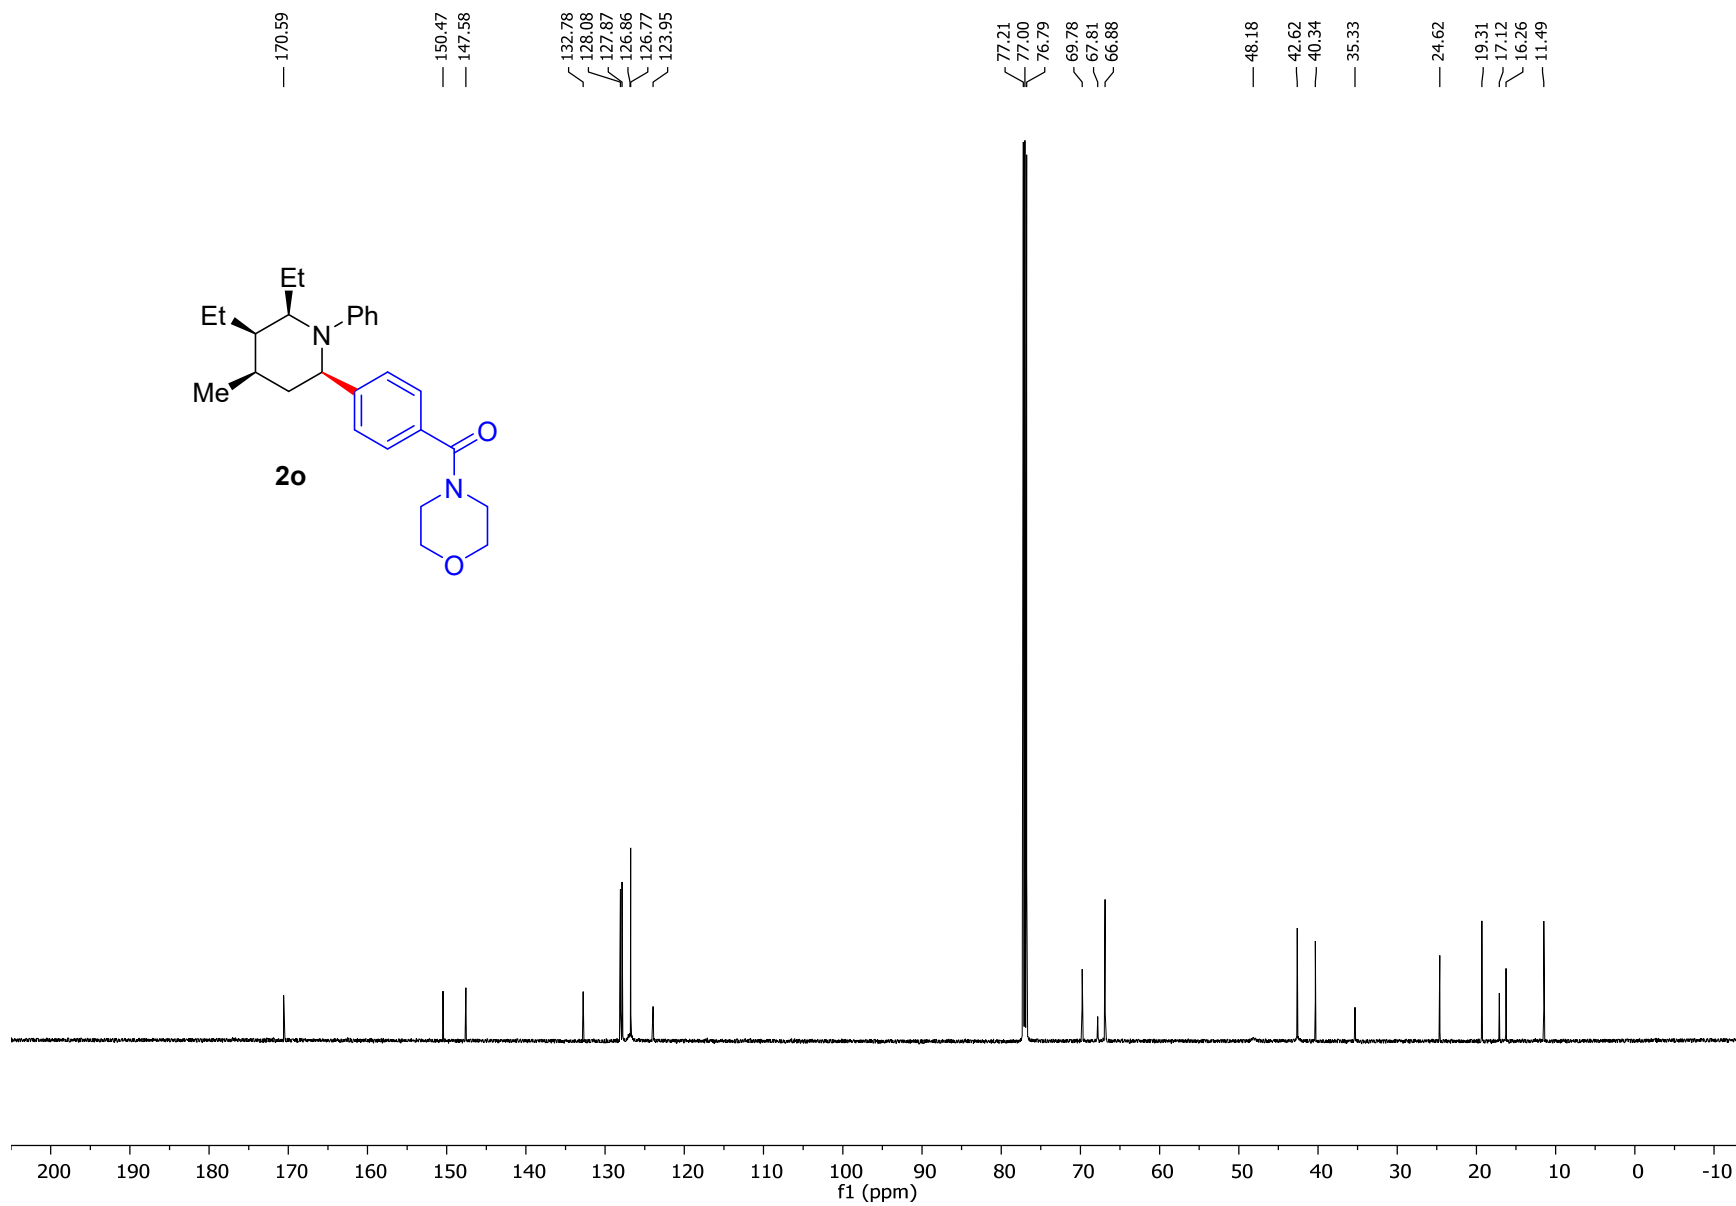

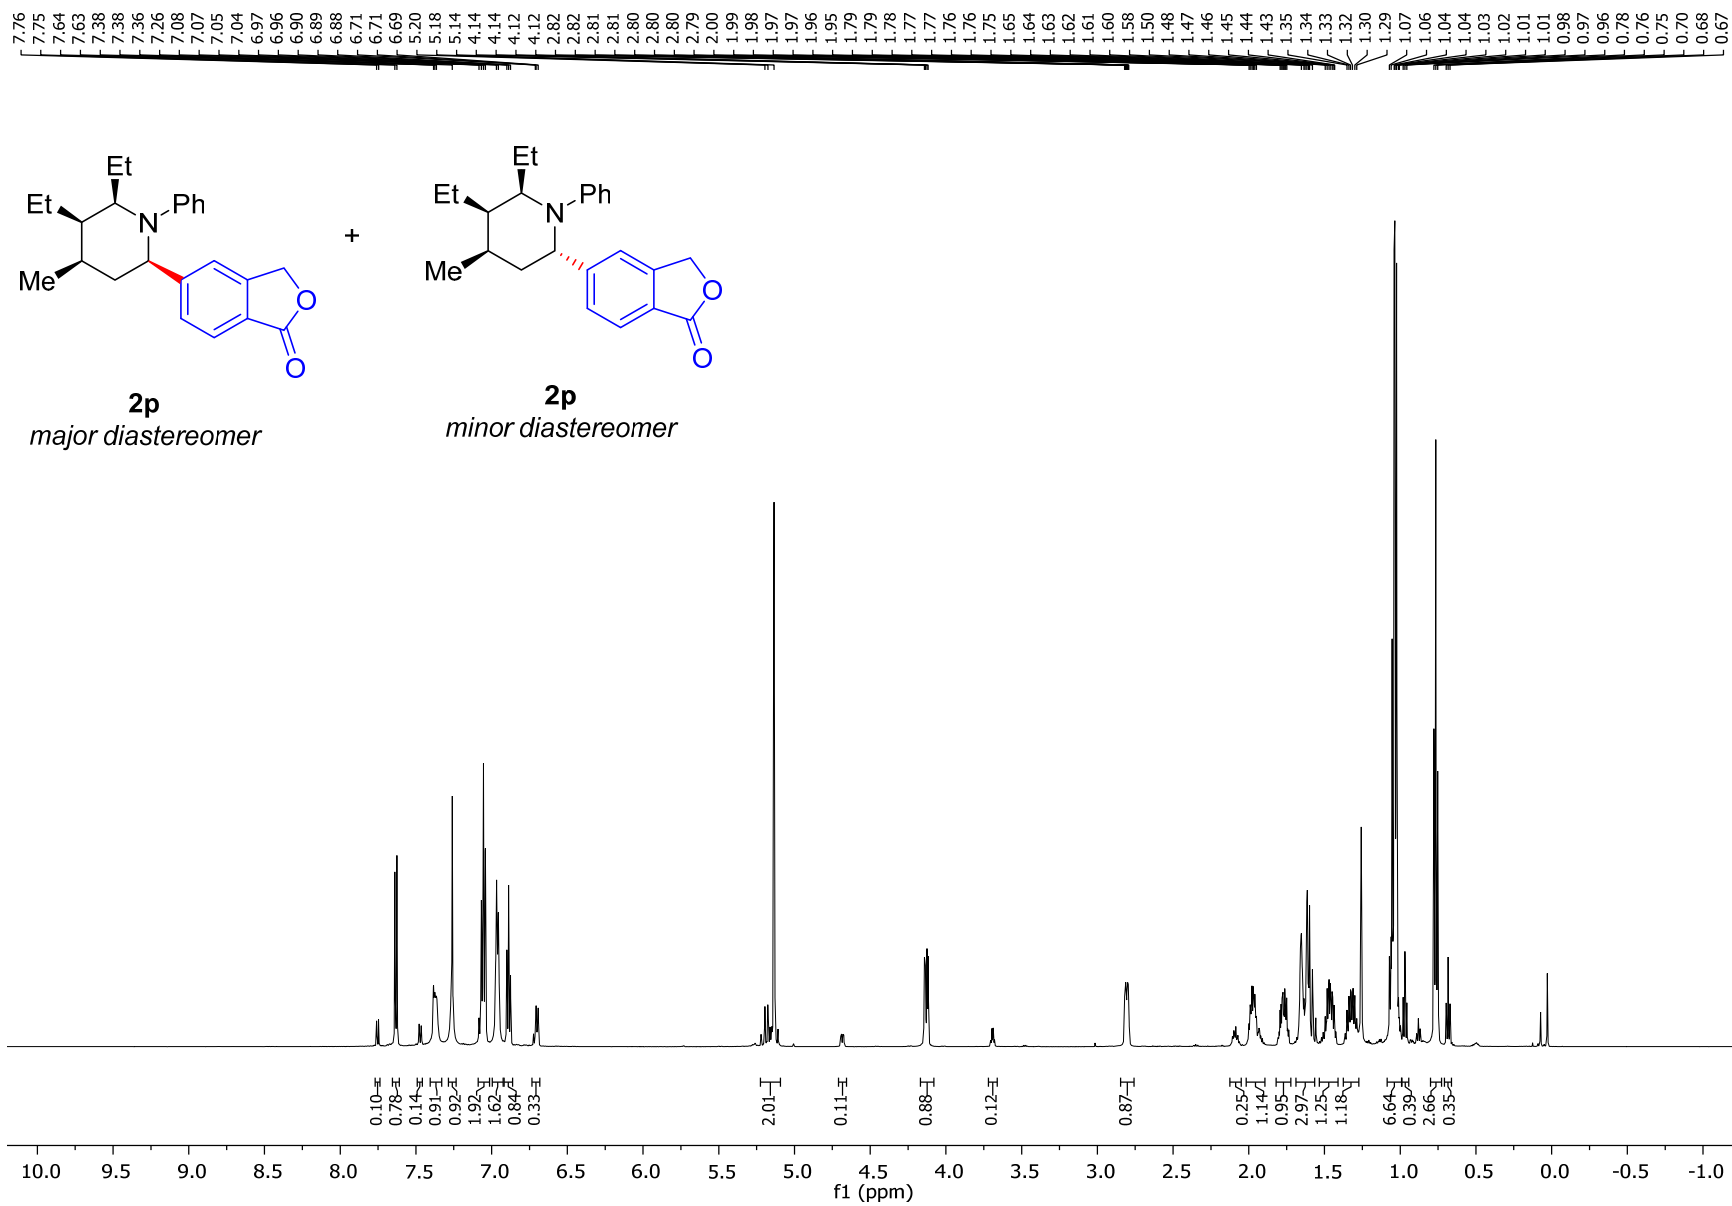

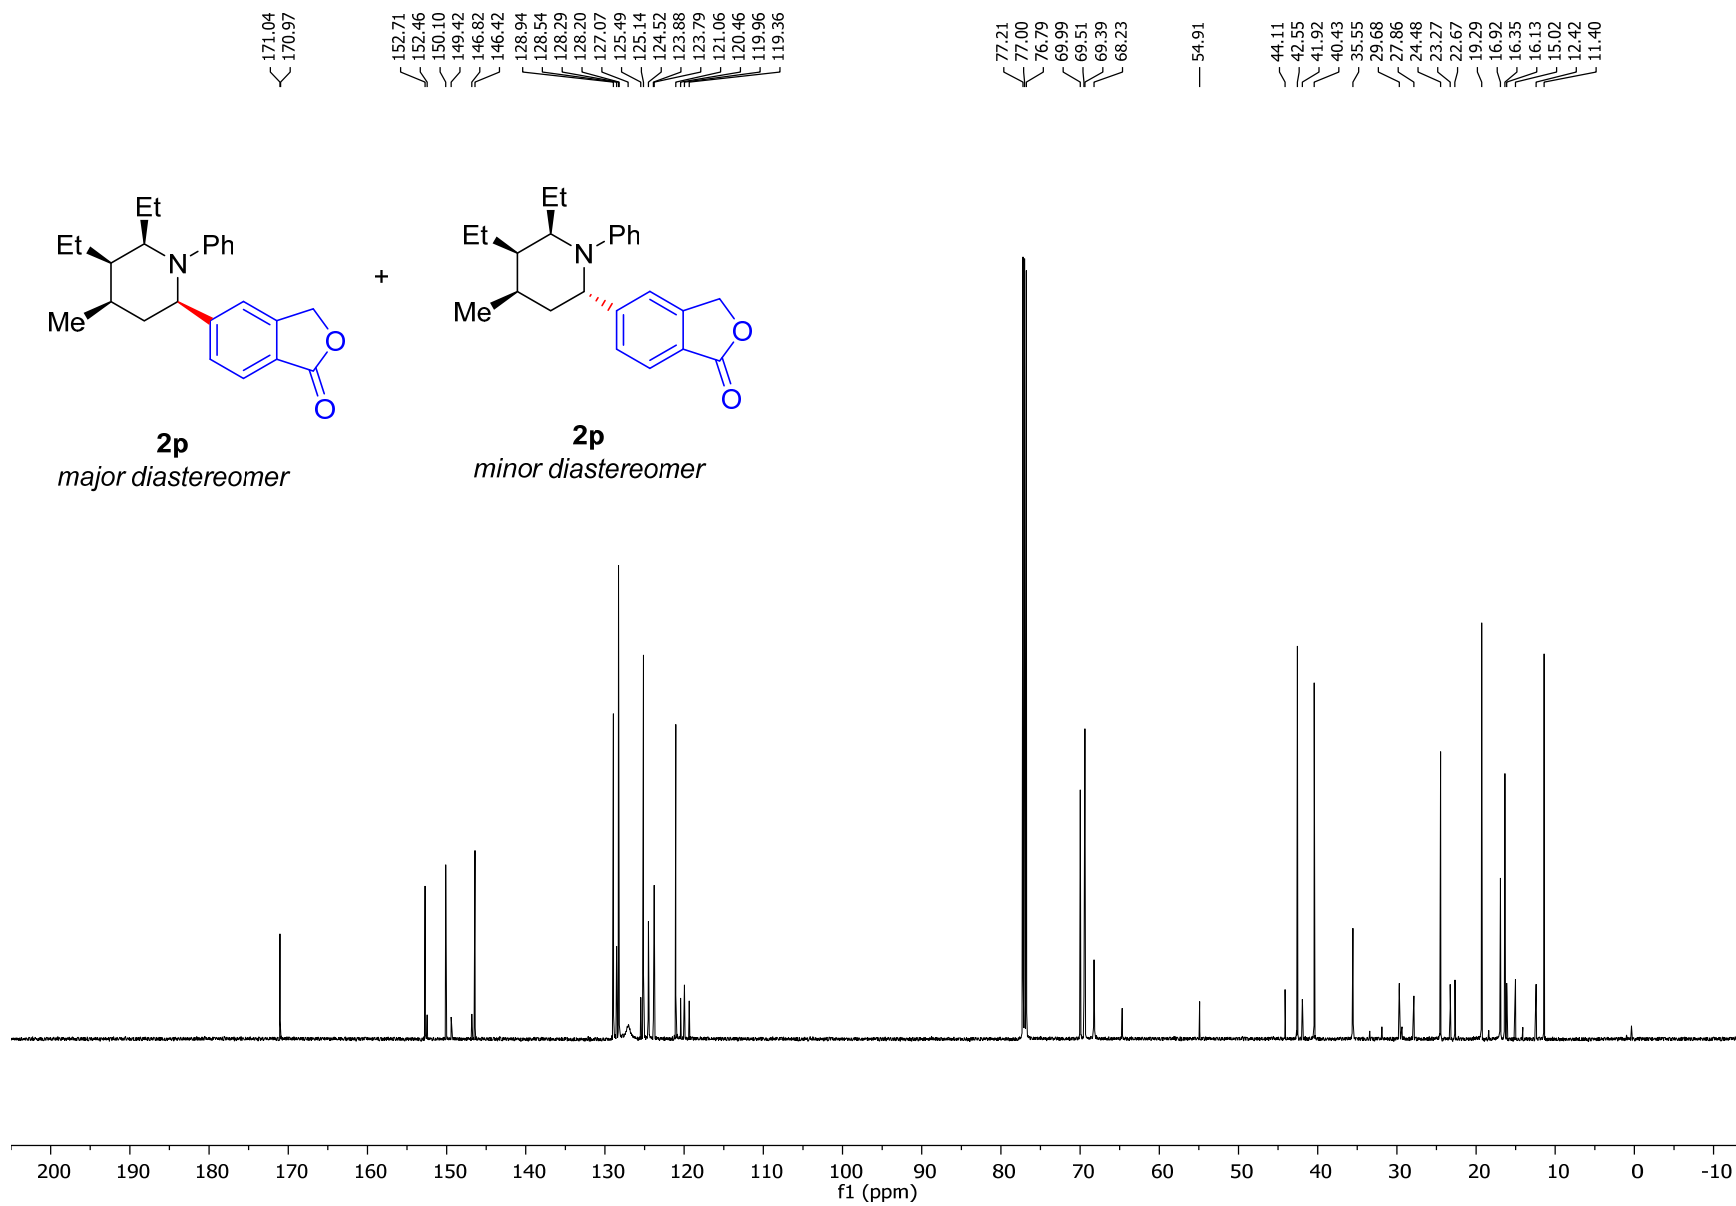

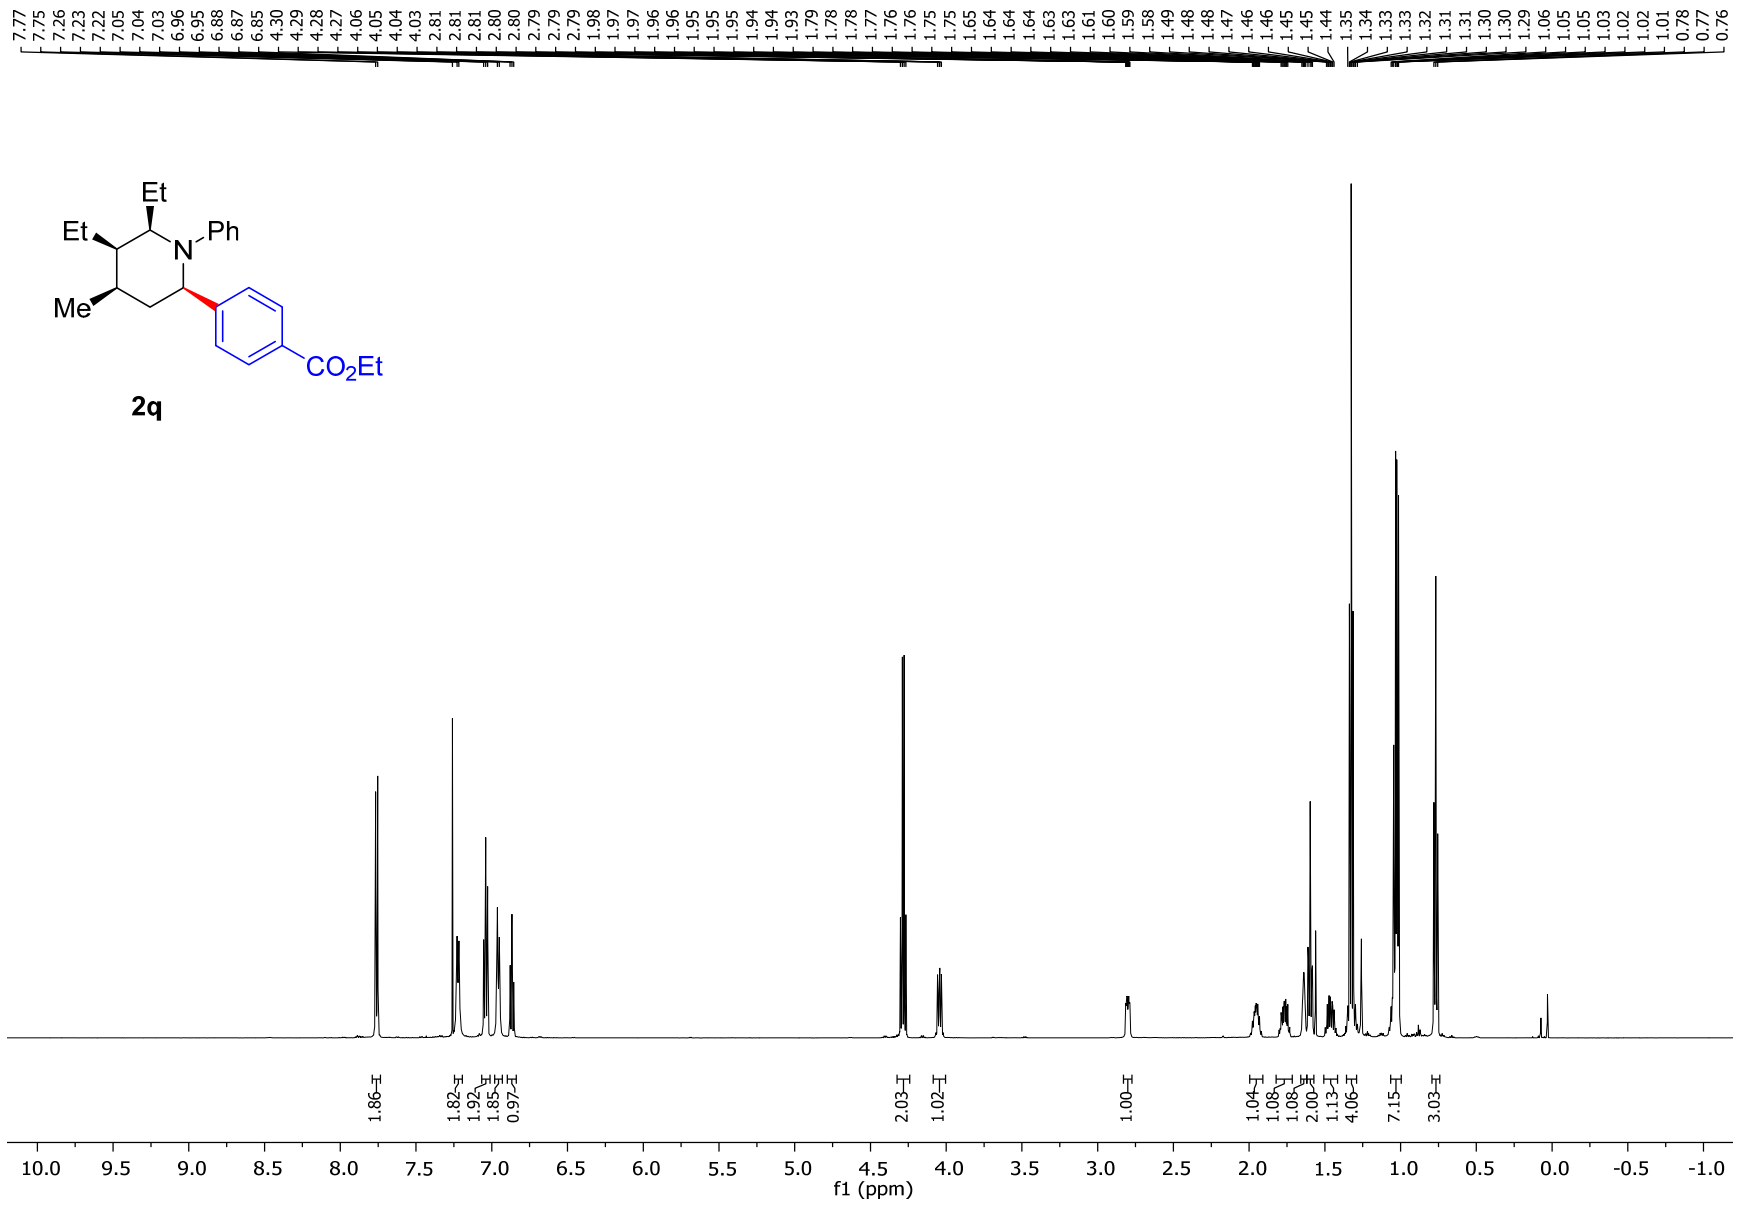

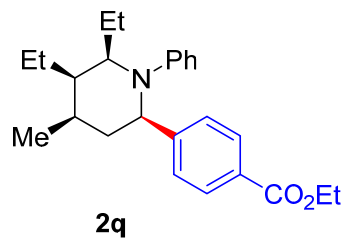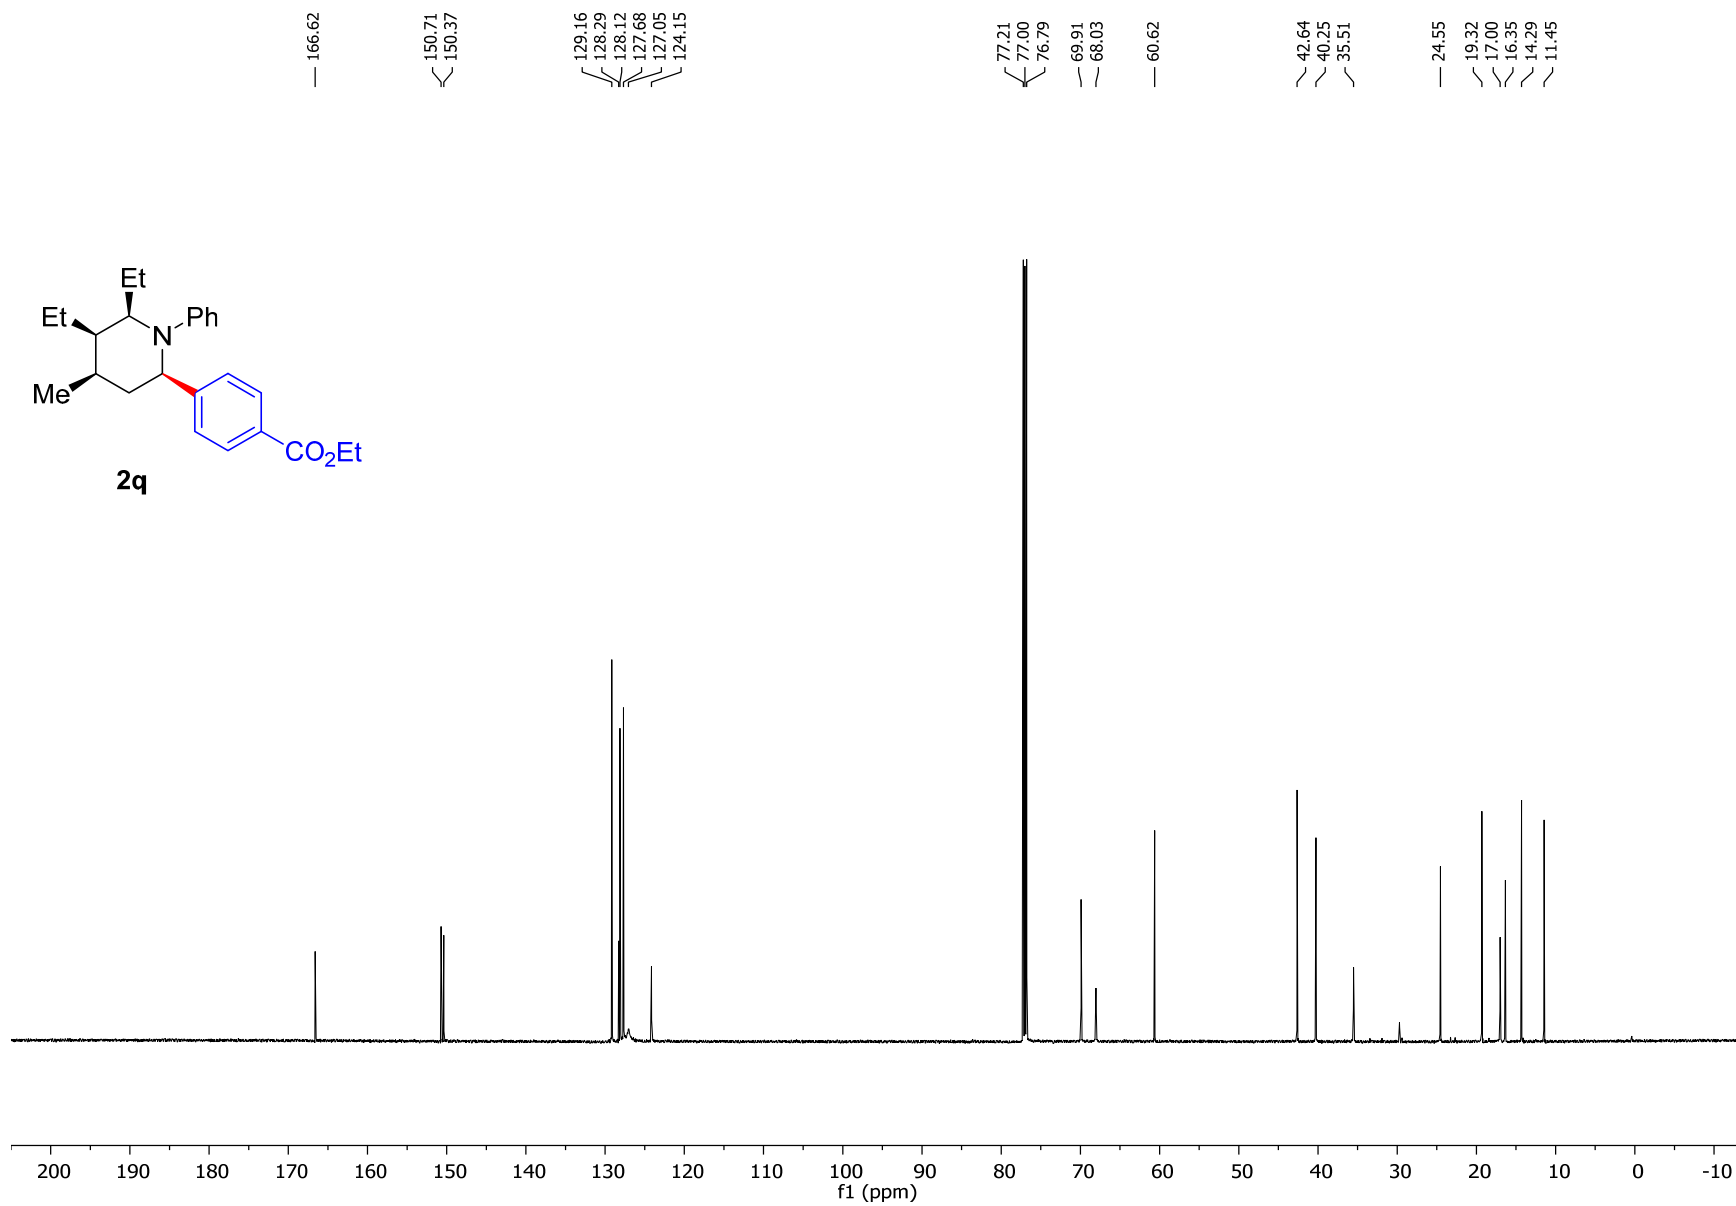

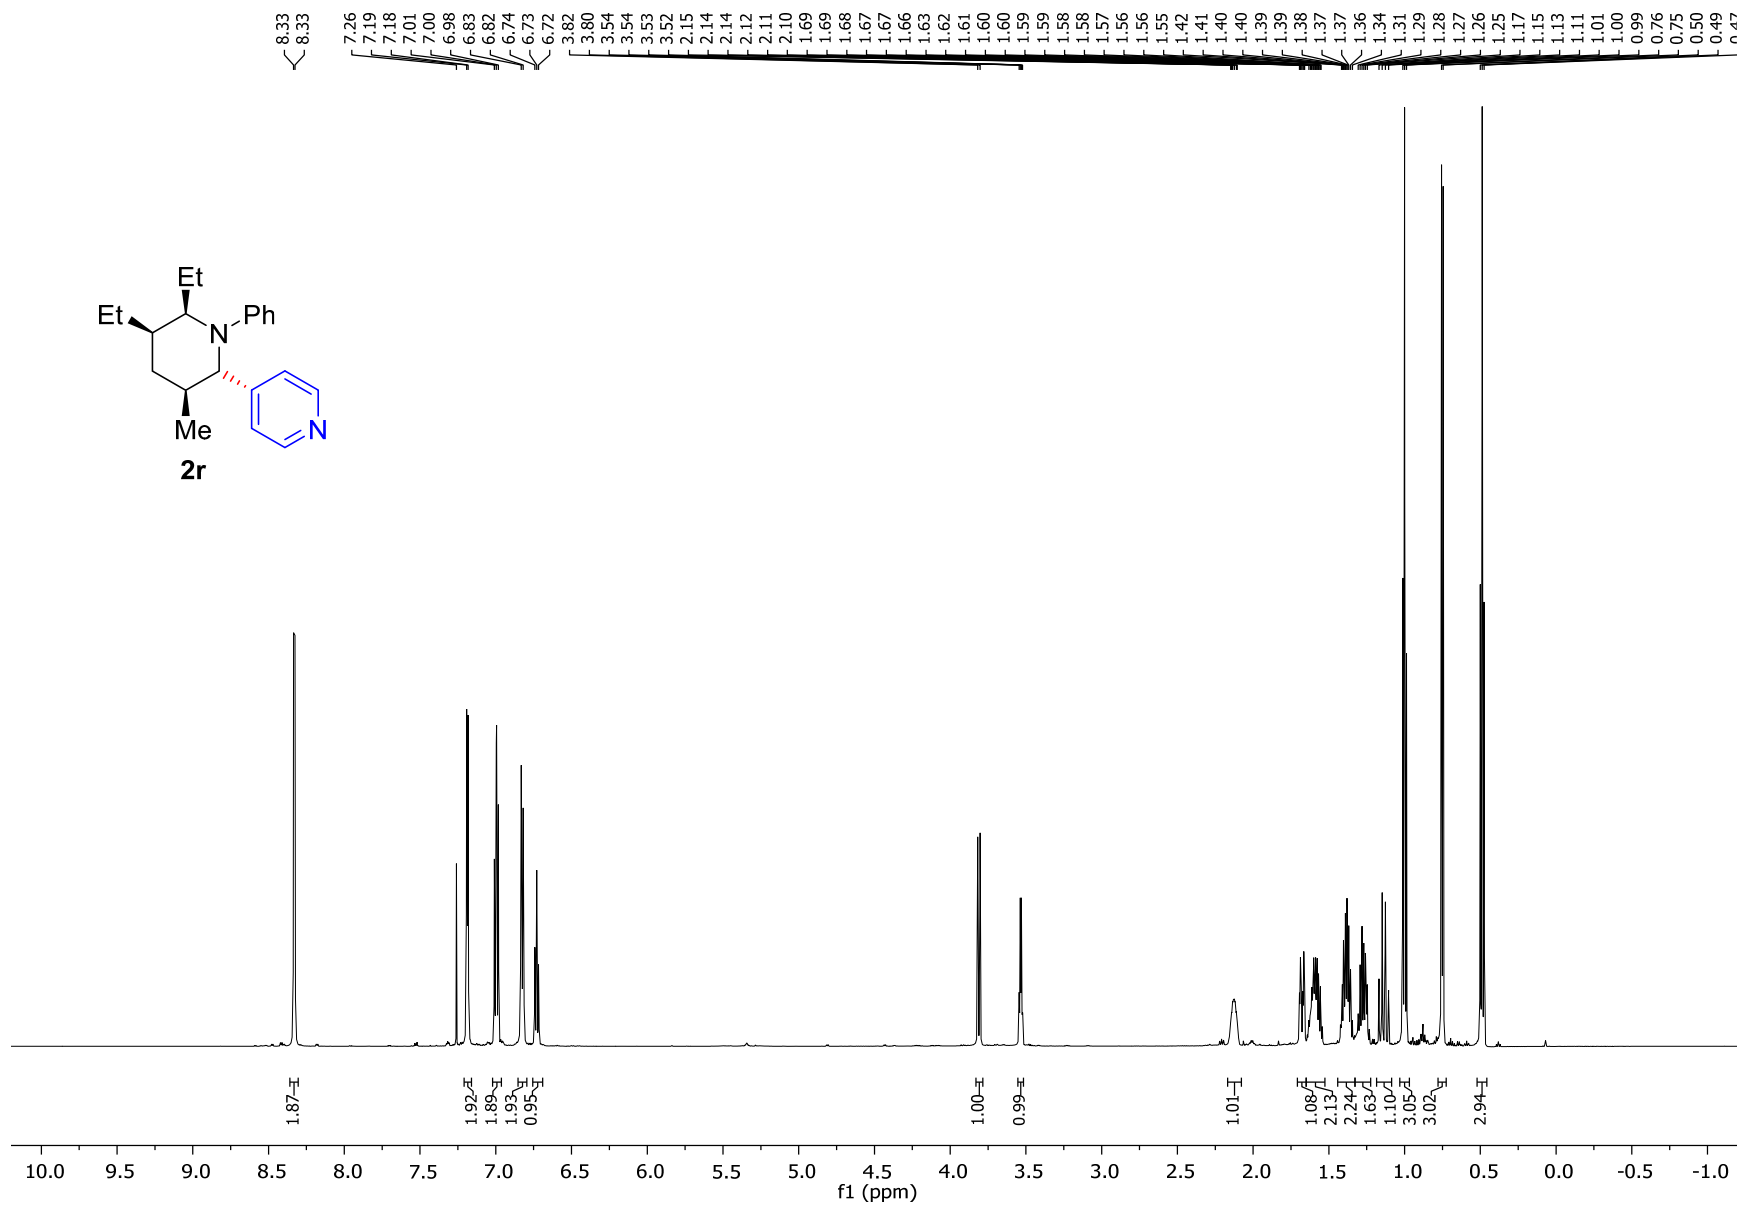

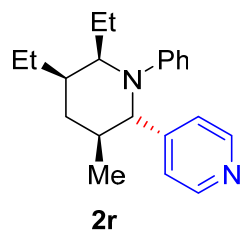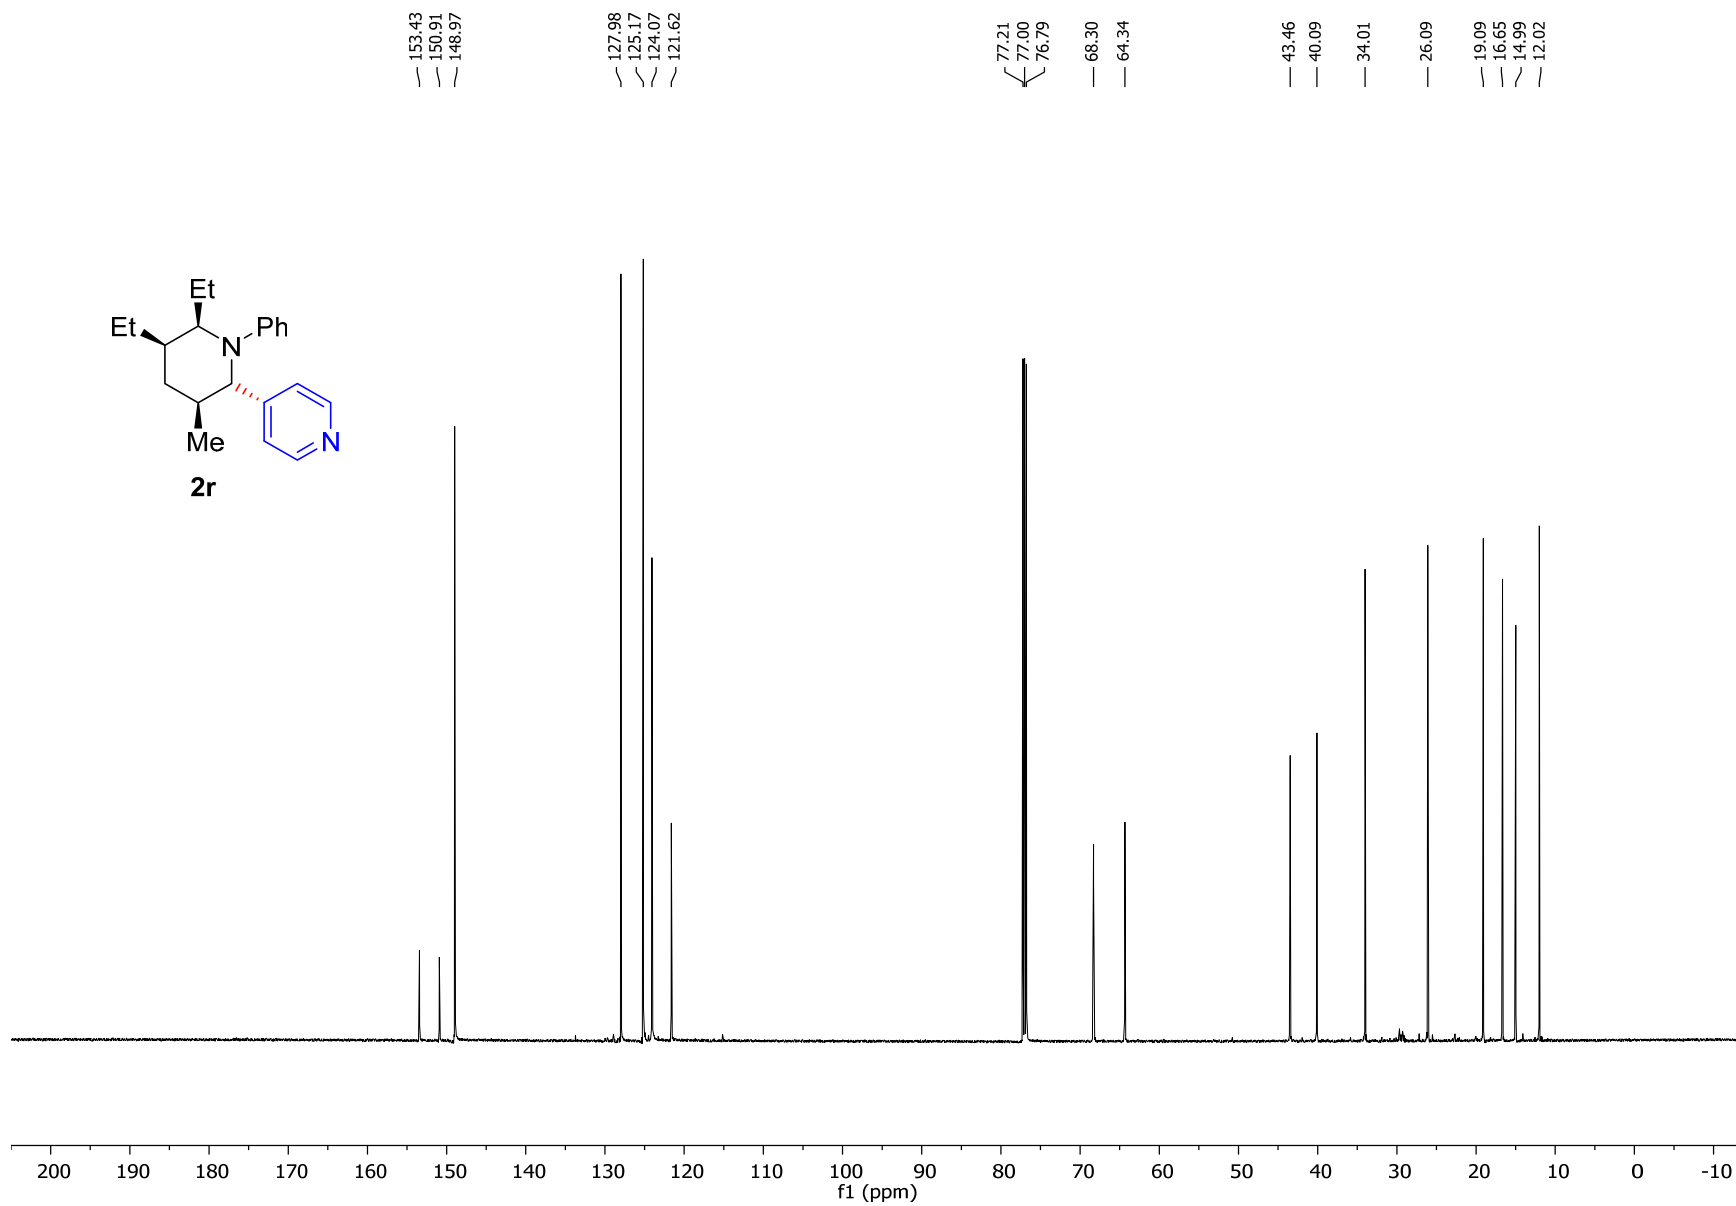



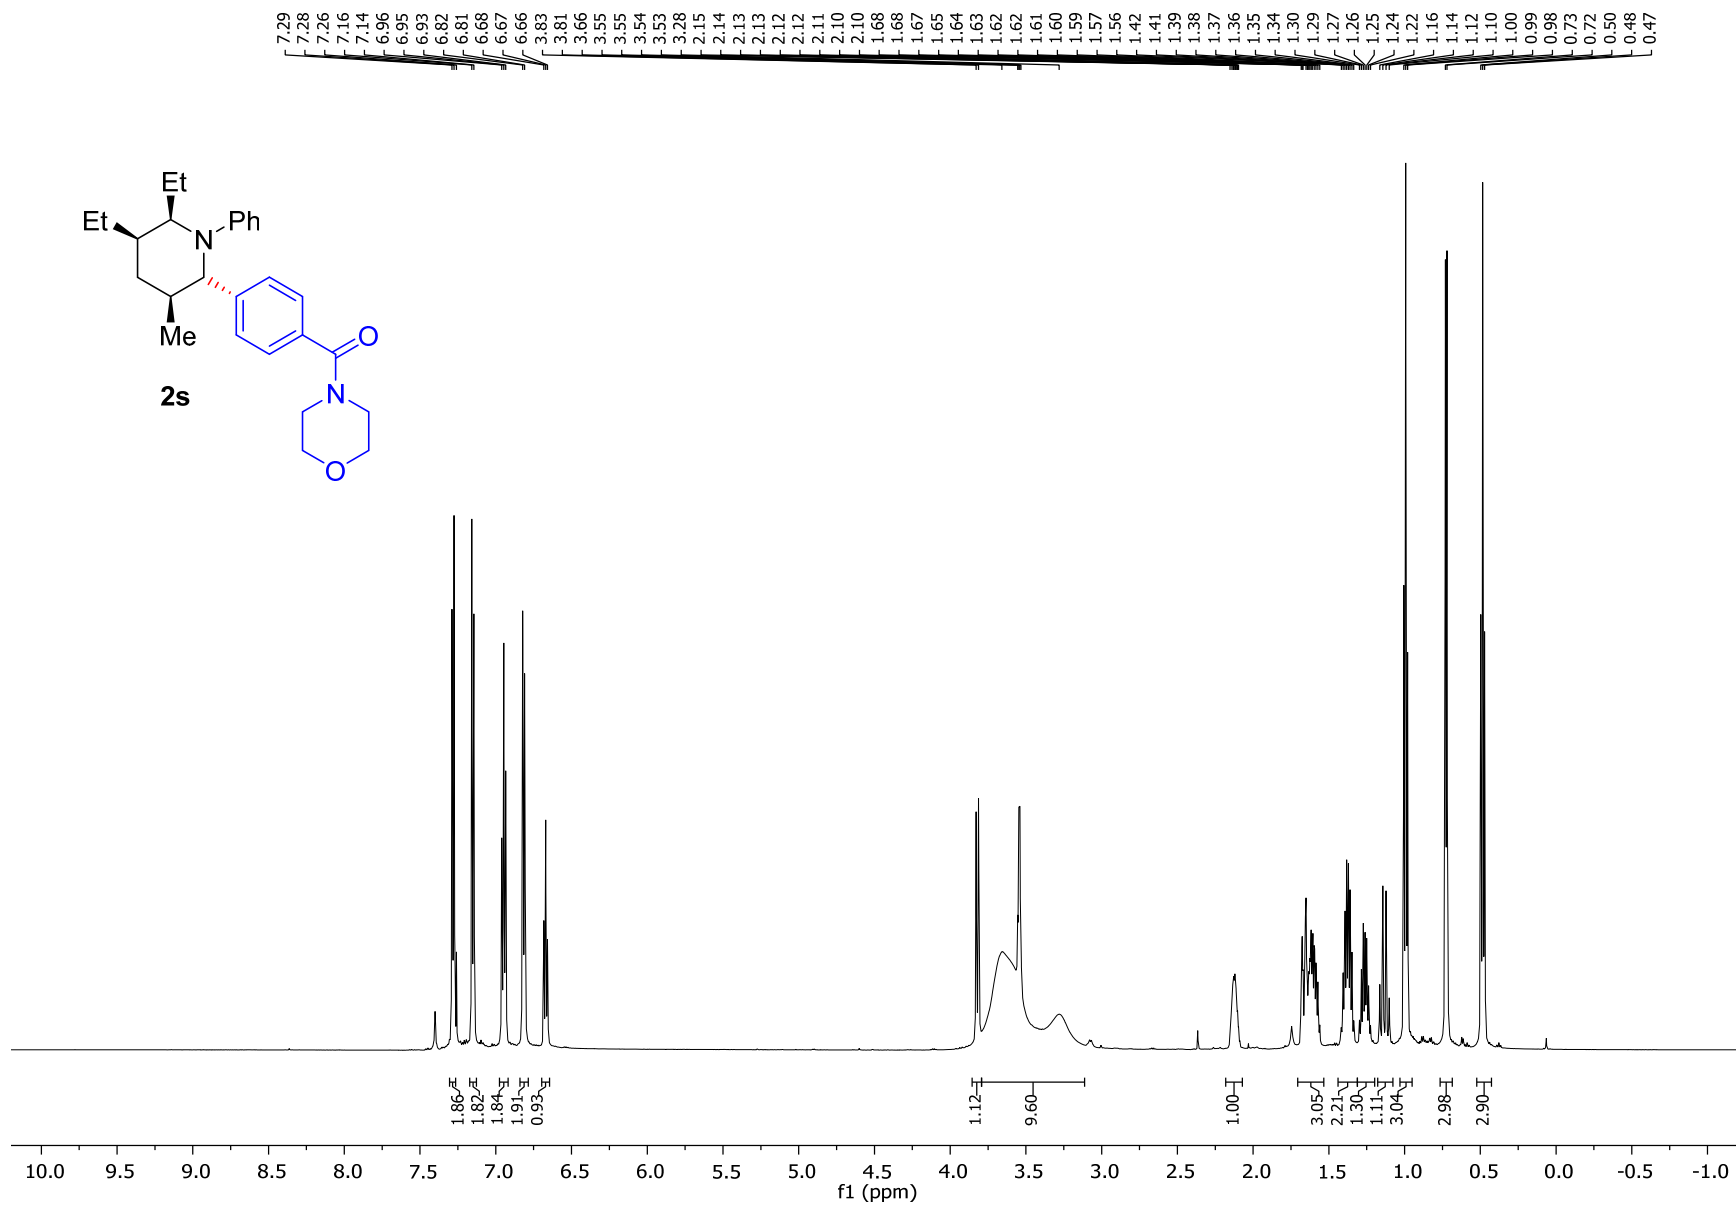

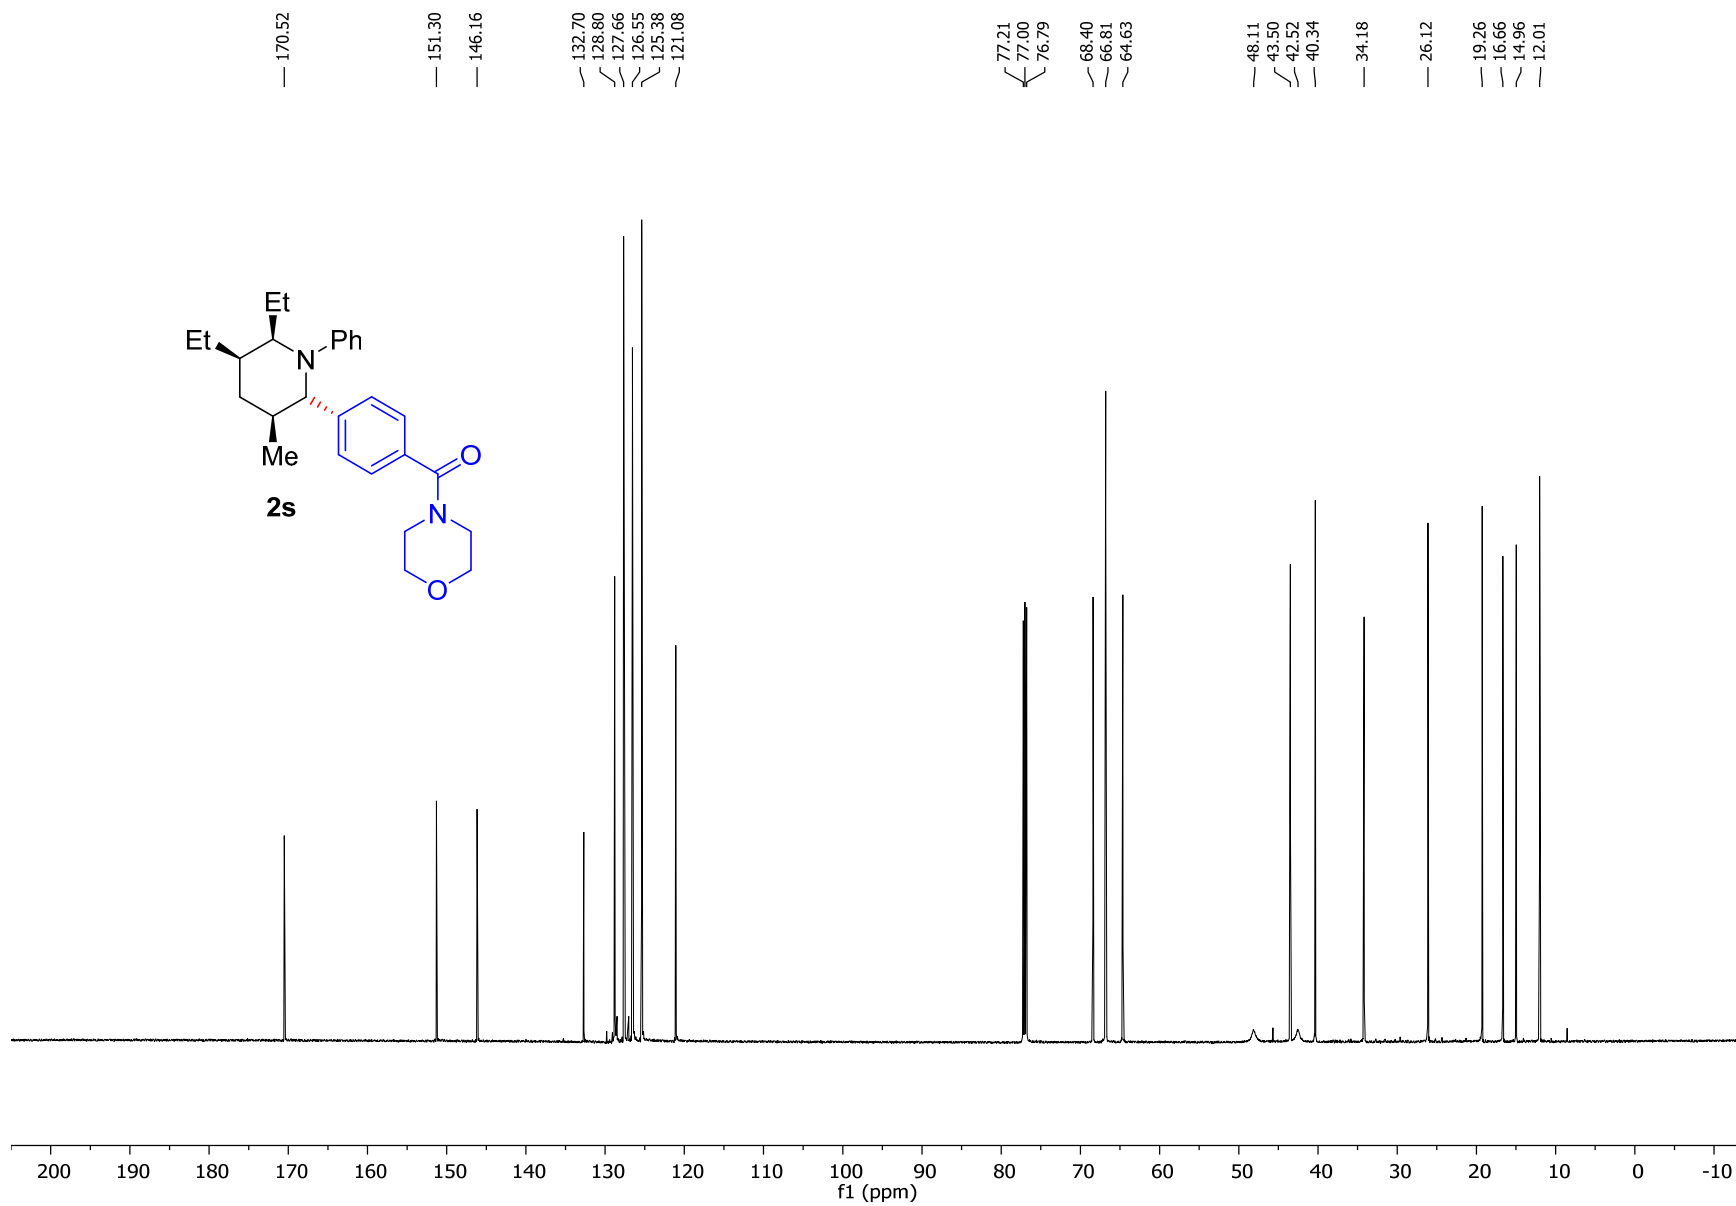

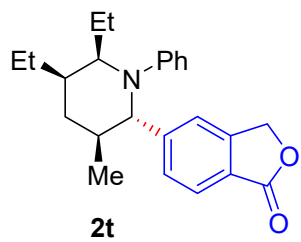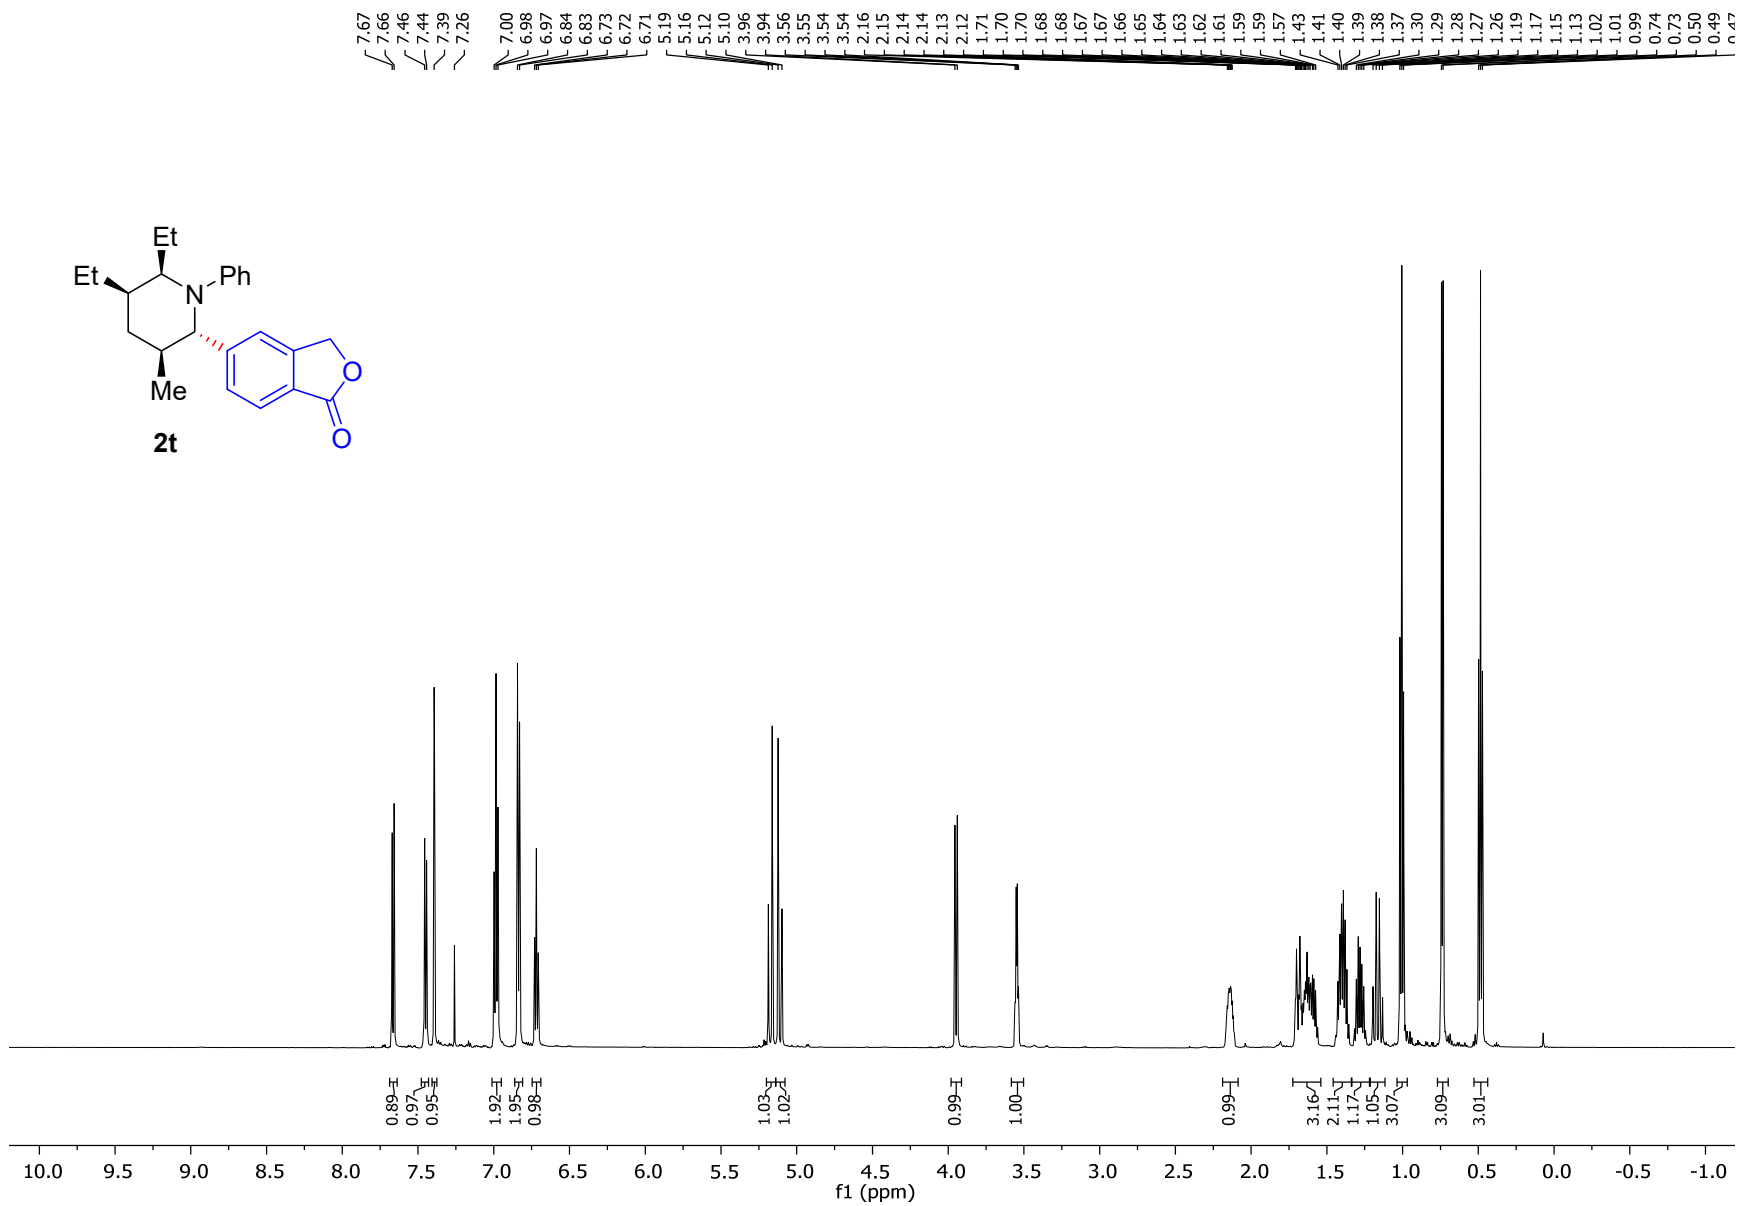

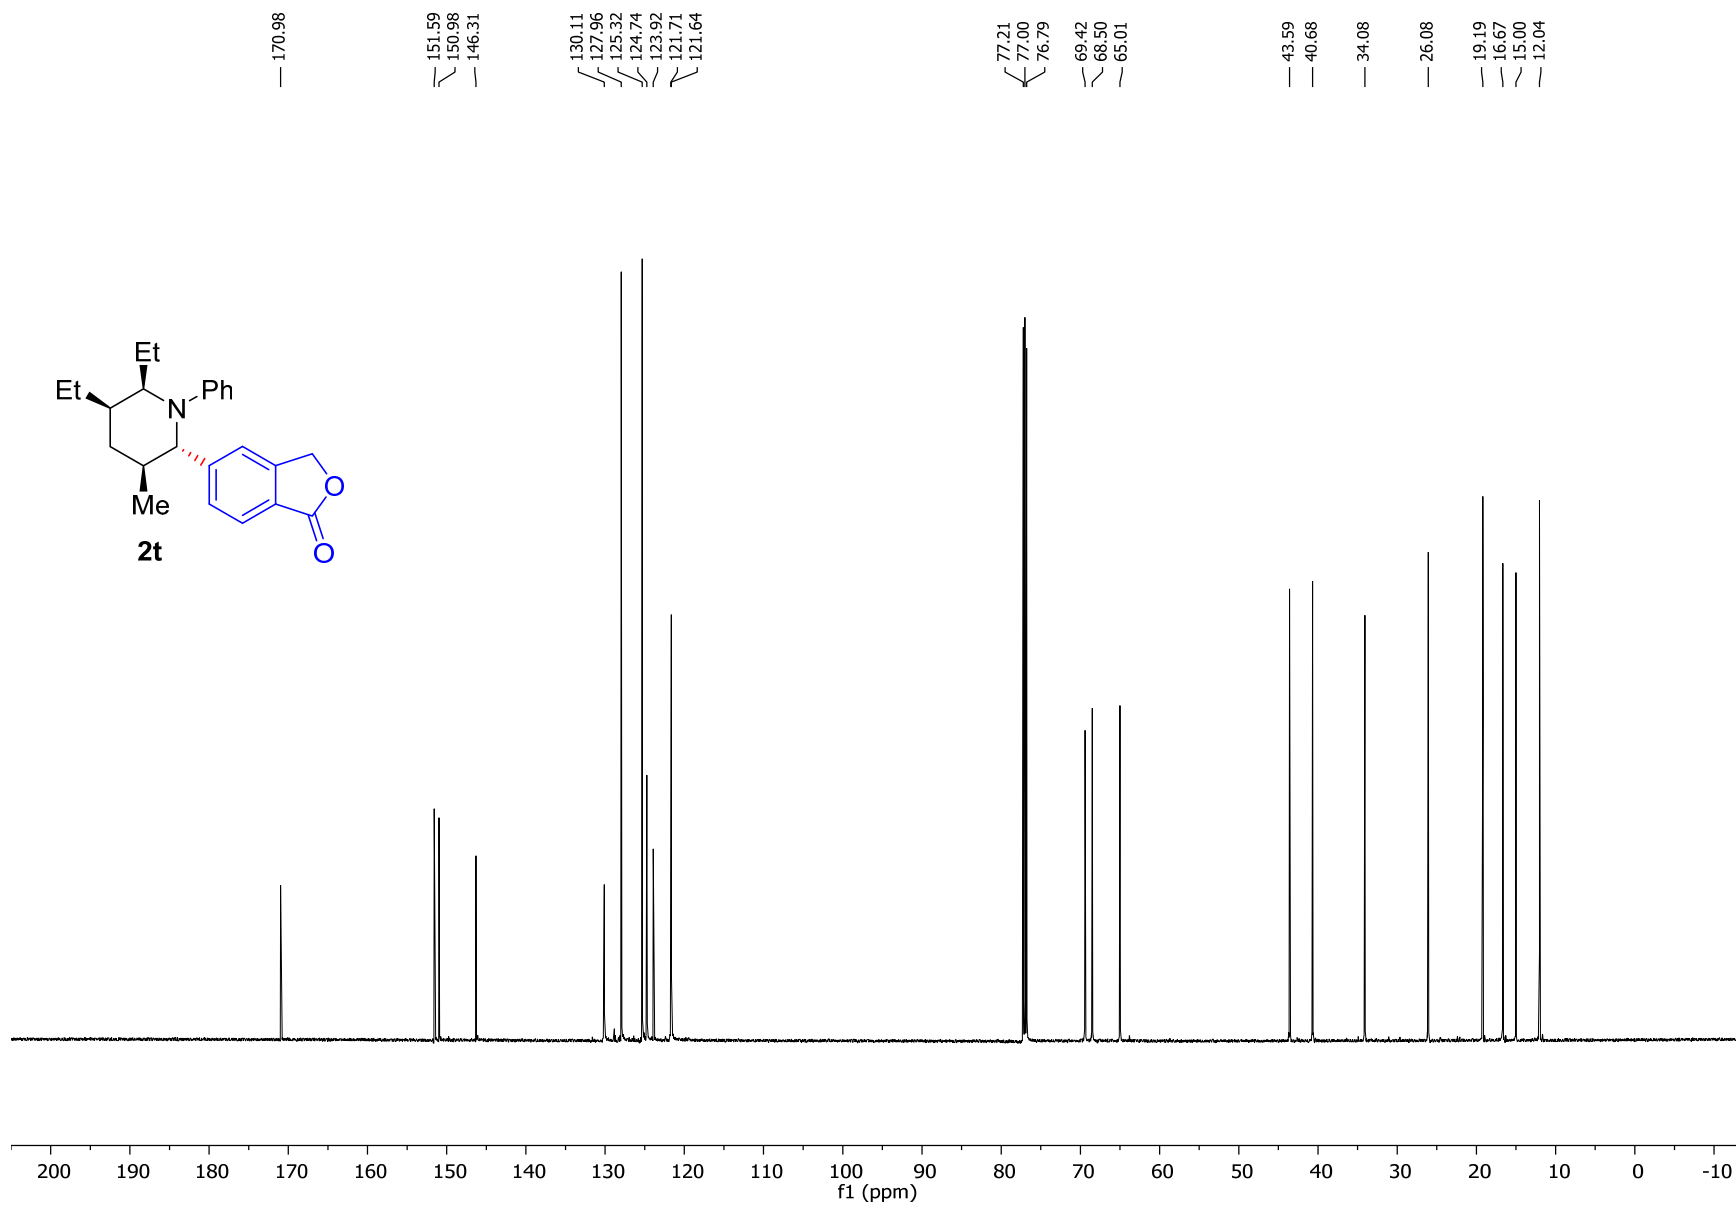

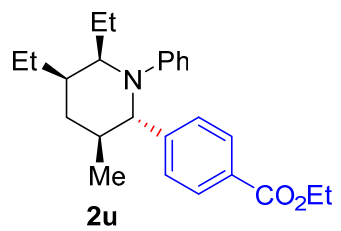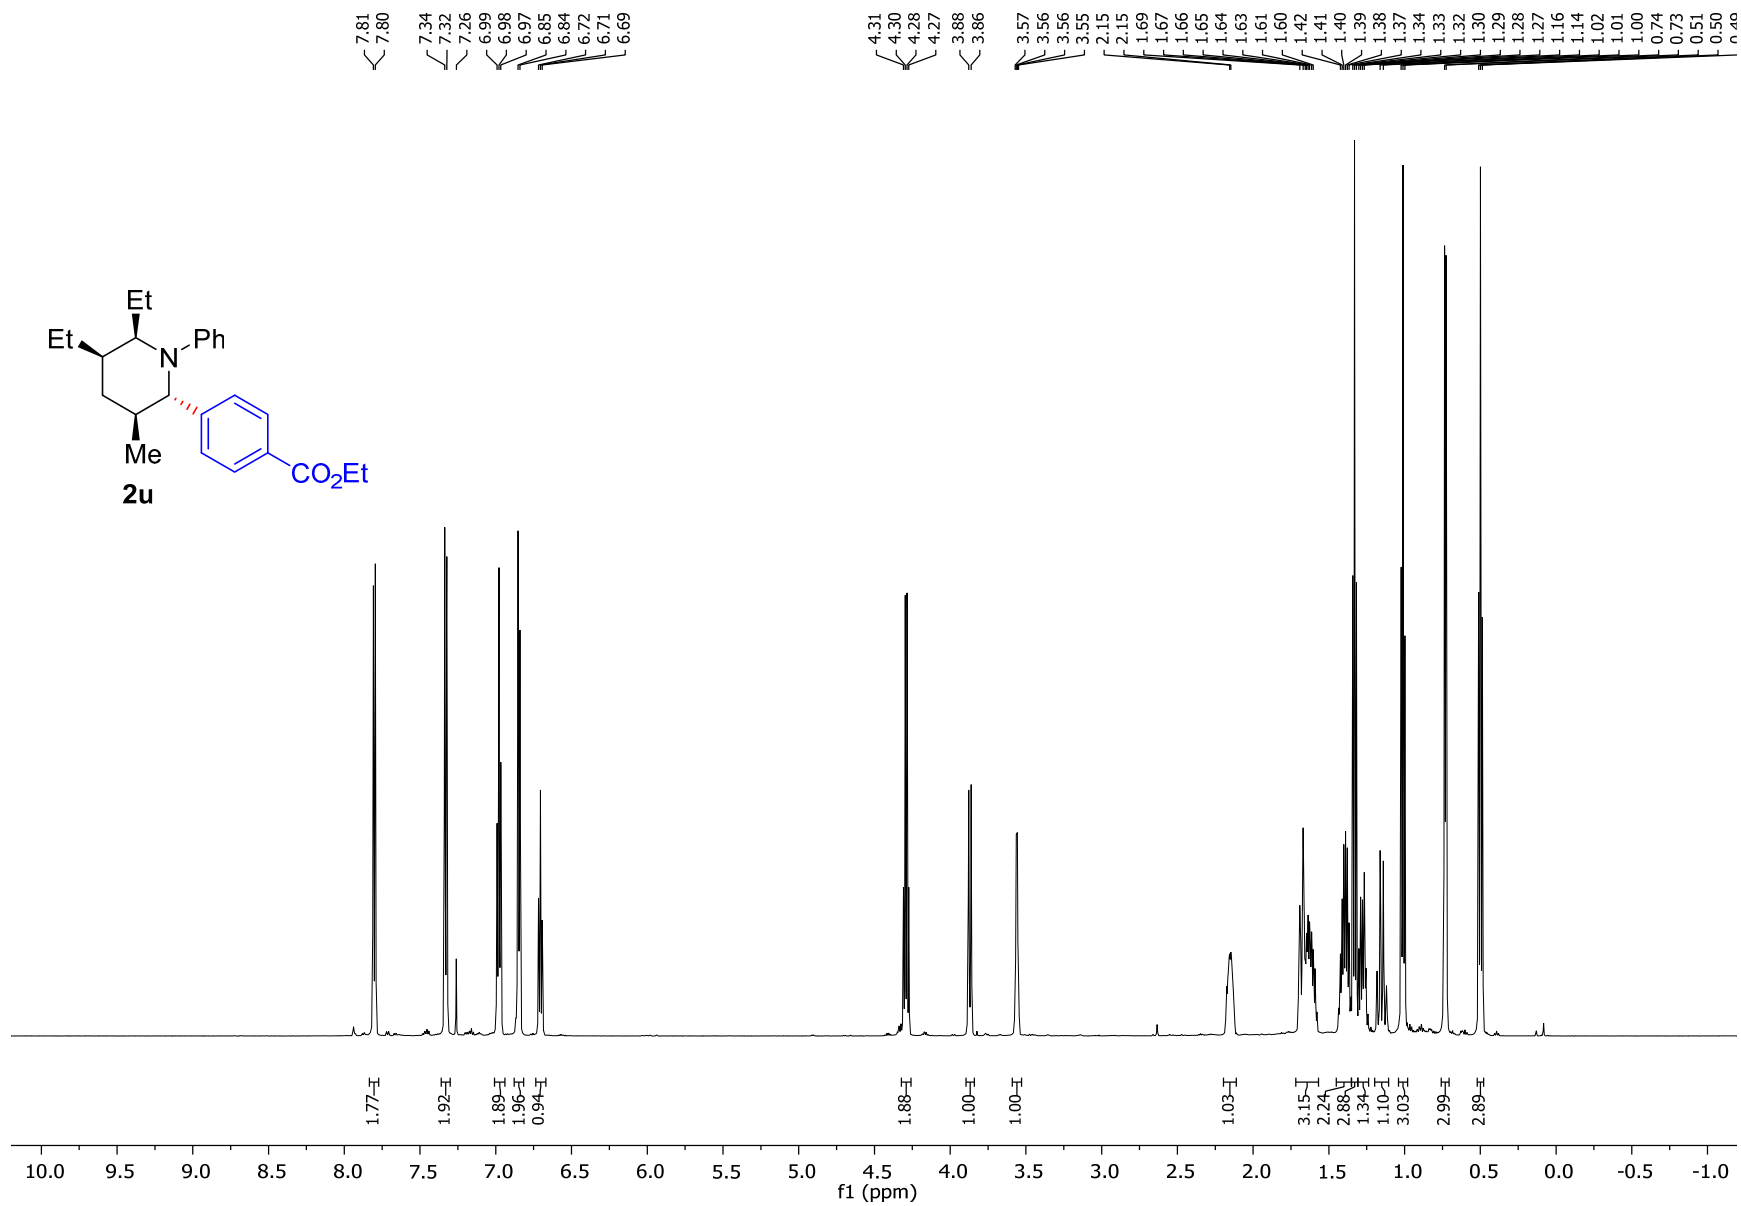

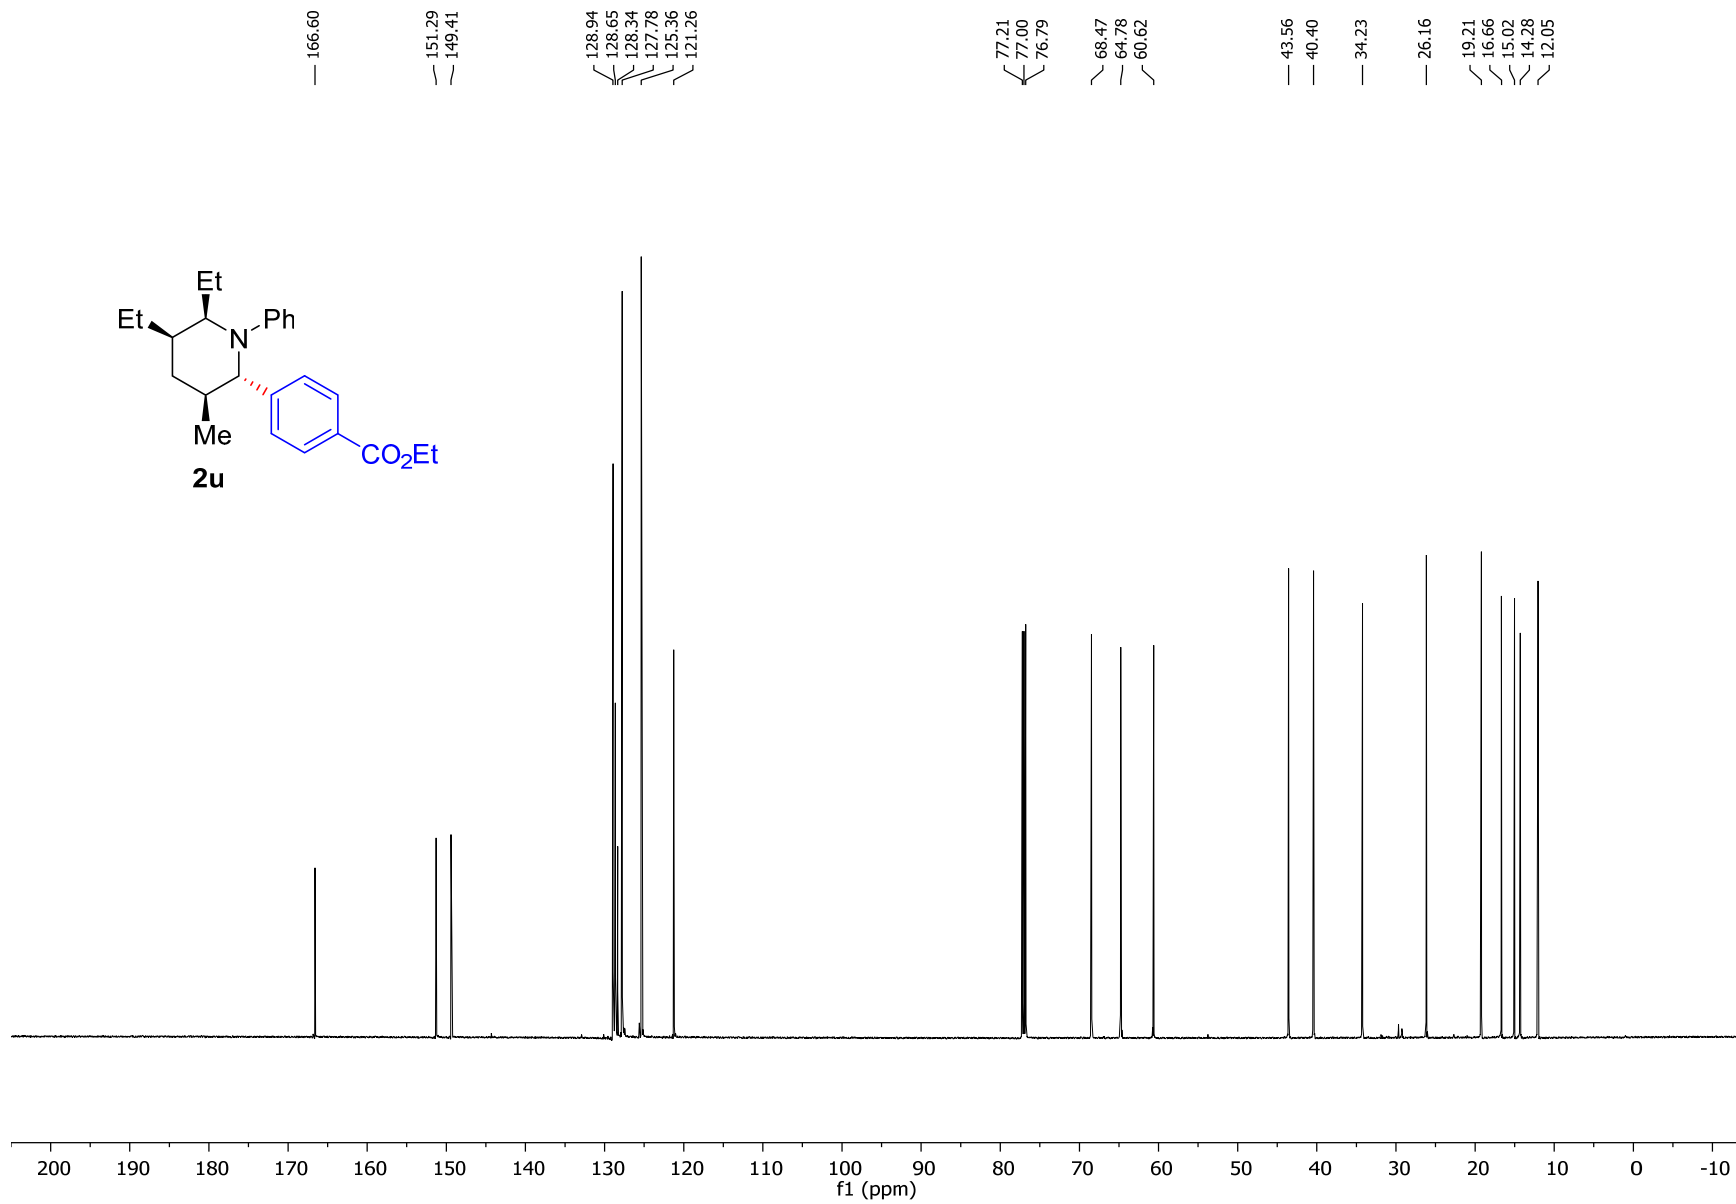

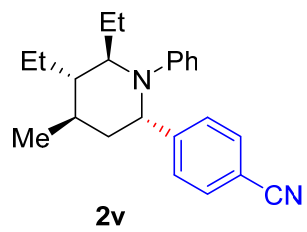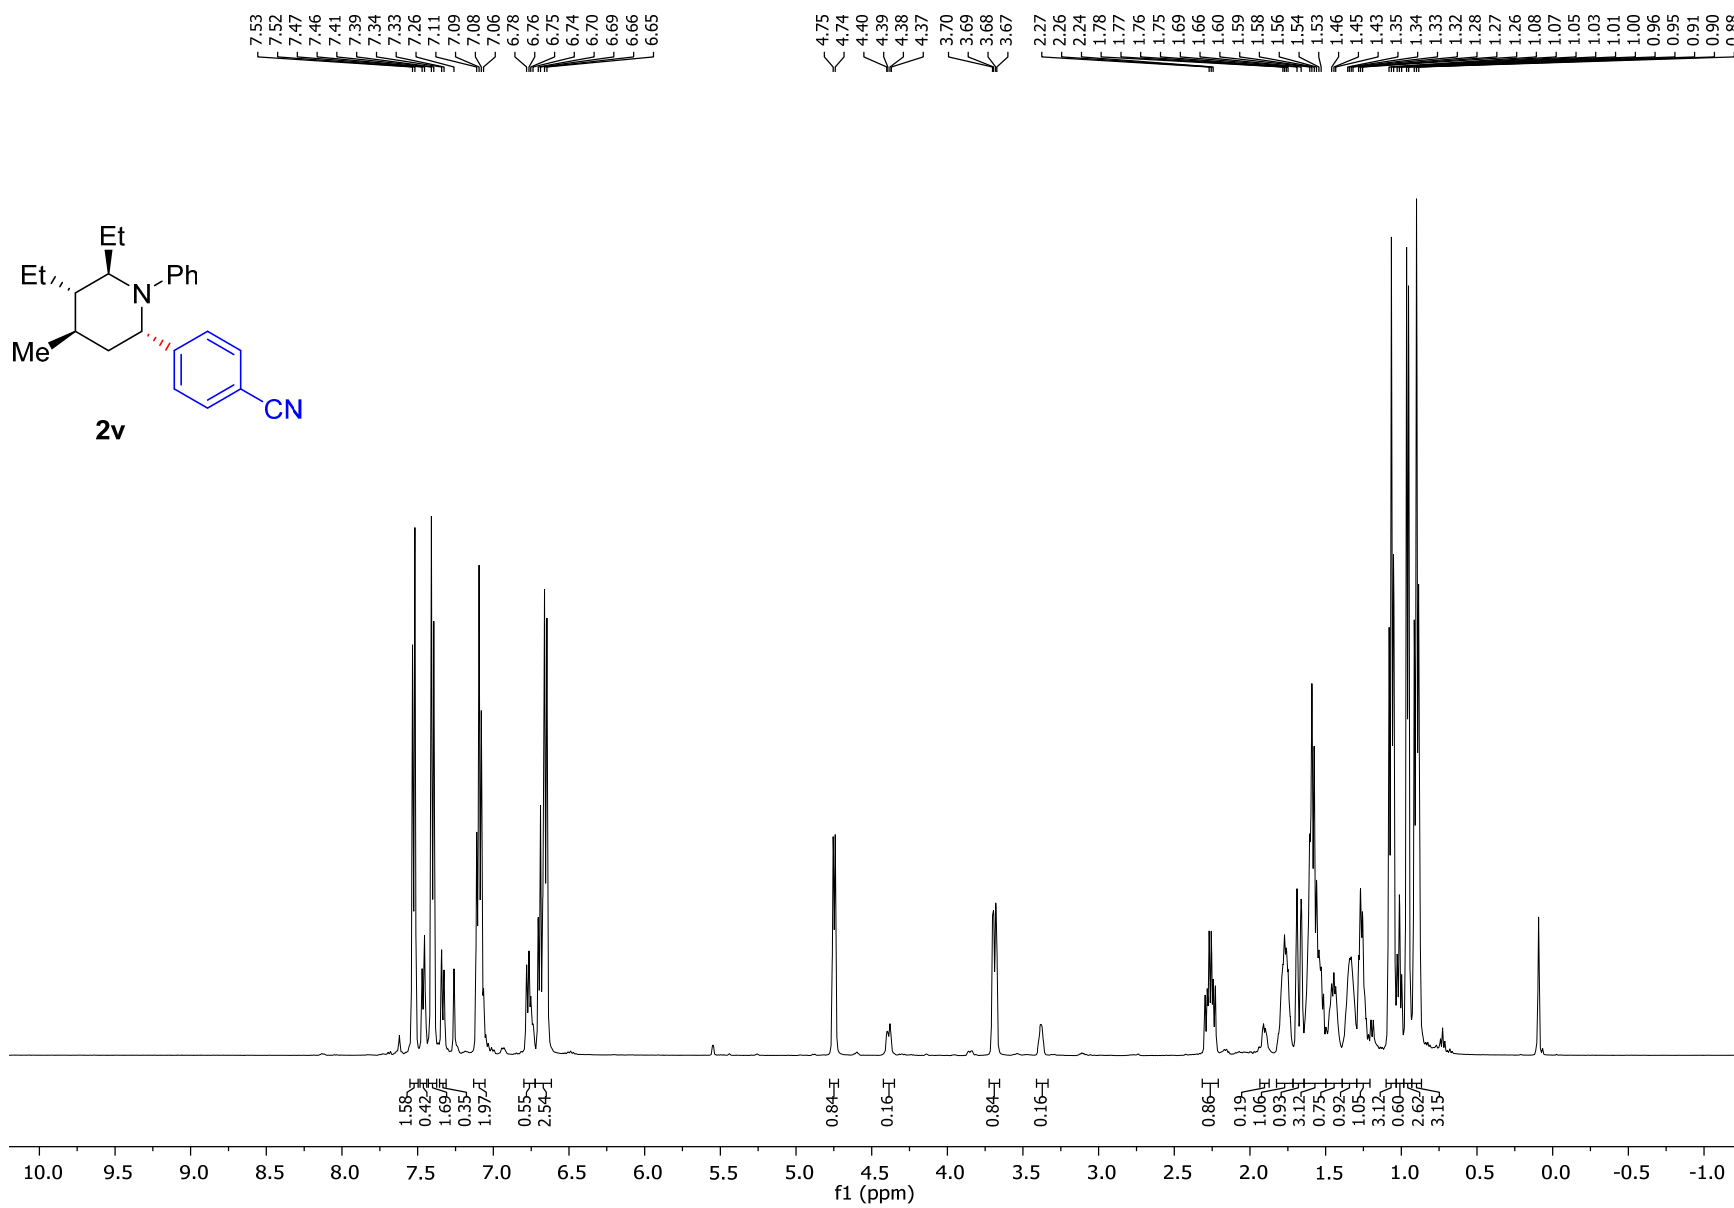

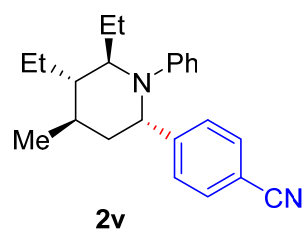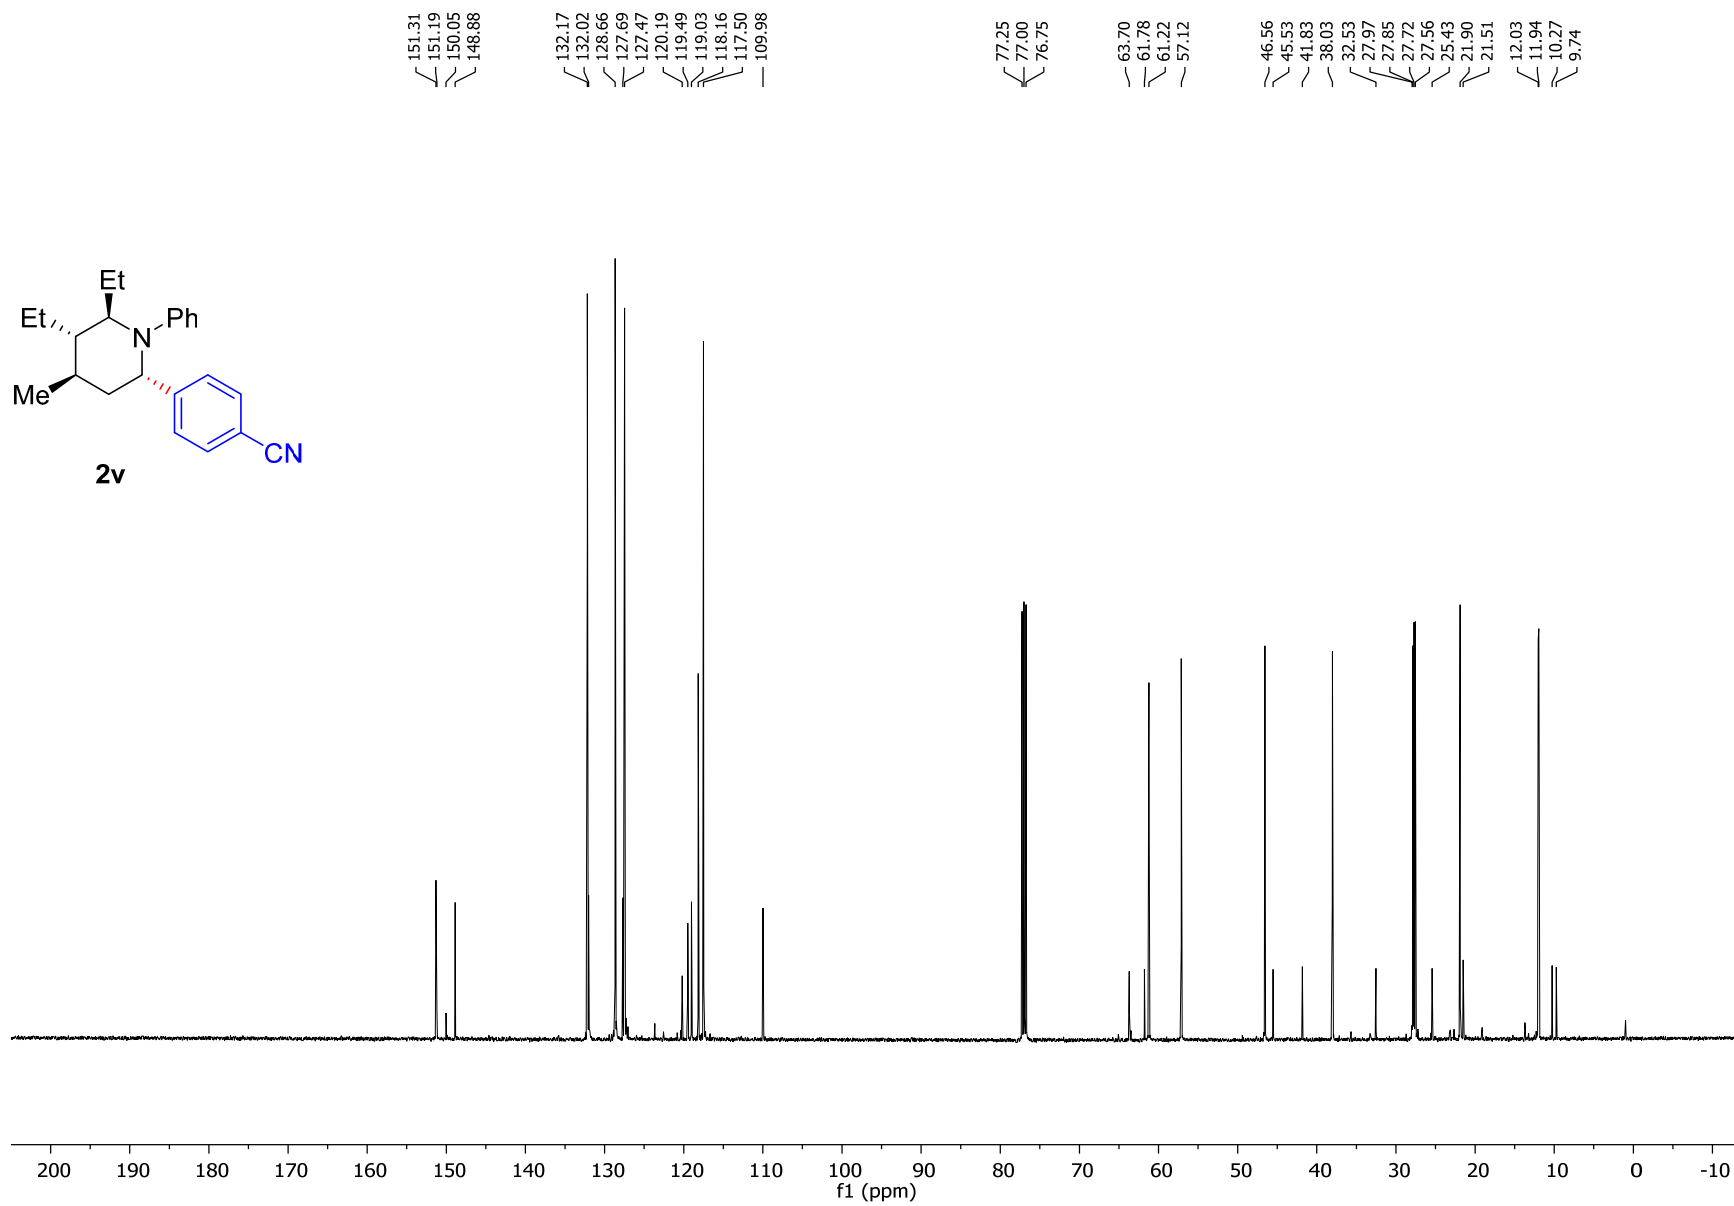



7.61  
7.59  
7.51  
7.49  
7.44  
7.43  
7.36  
7.35  
7.26  
7.24  
7.23  
7.21  
7.12  
7.11  
7.09  
6.99  
6.89  
6.88  
6.87  
6.82  
6.81  
6.79  
5.41  
5.40  
5.36  
5.34  
5.07  
5.06  
5.06  
4.22  
4.21  
4.20  
4.20  
4.09  
4.06  
4.06  
4.05  
4.04  
4.04  
4.03  
4.02  
4.01  
4.00  
3.99  
3.70  
3.69  
3.68  
3.67  
3.67  
3.66  
3.55  
3.54  
3.54  
3.53  
3.52  
3.52  
3.51  
3.31  
3.30  
3.20  
3.19  
3.19  
3.18  
3.17  
3.17  
2.96  
2.96  
2.94  
2.93  
2.92  
2.91  
2.91  
2.53  
2.52  
2.52  
2.51  
2.50  
2.50  
2.25  
2.25  
2.25  
2.23  
2.23  
2.23  
2.10  
2.10  
2.09  
2.08  
2.08  
1.98  
1.97  
1.96  
1.90  
1.89  
1.88  
1.88  
1.87  
1.86  
1.85  
1.77  
1.77  
1.75  
1.75  
1.73  
1.73  
1.71  
1.71  
1.65  
1.64  
1.63  
1.62  
1.61  
1.61  
1.60  
1.58  
1.49  
1.47  
1.45  
1.43

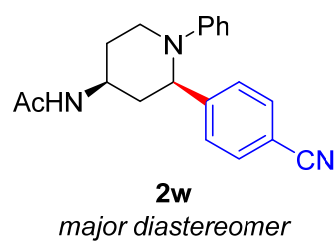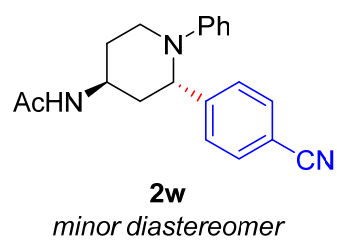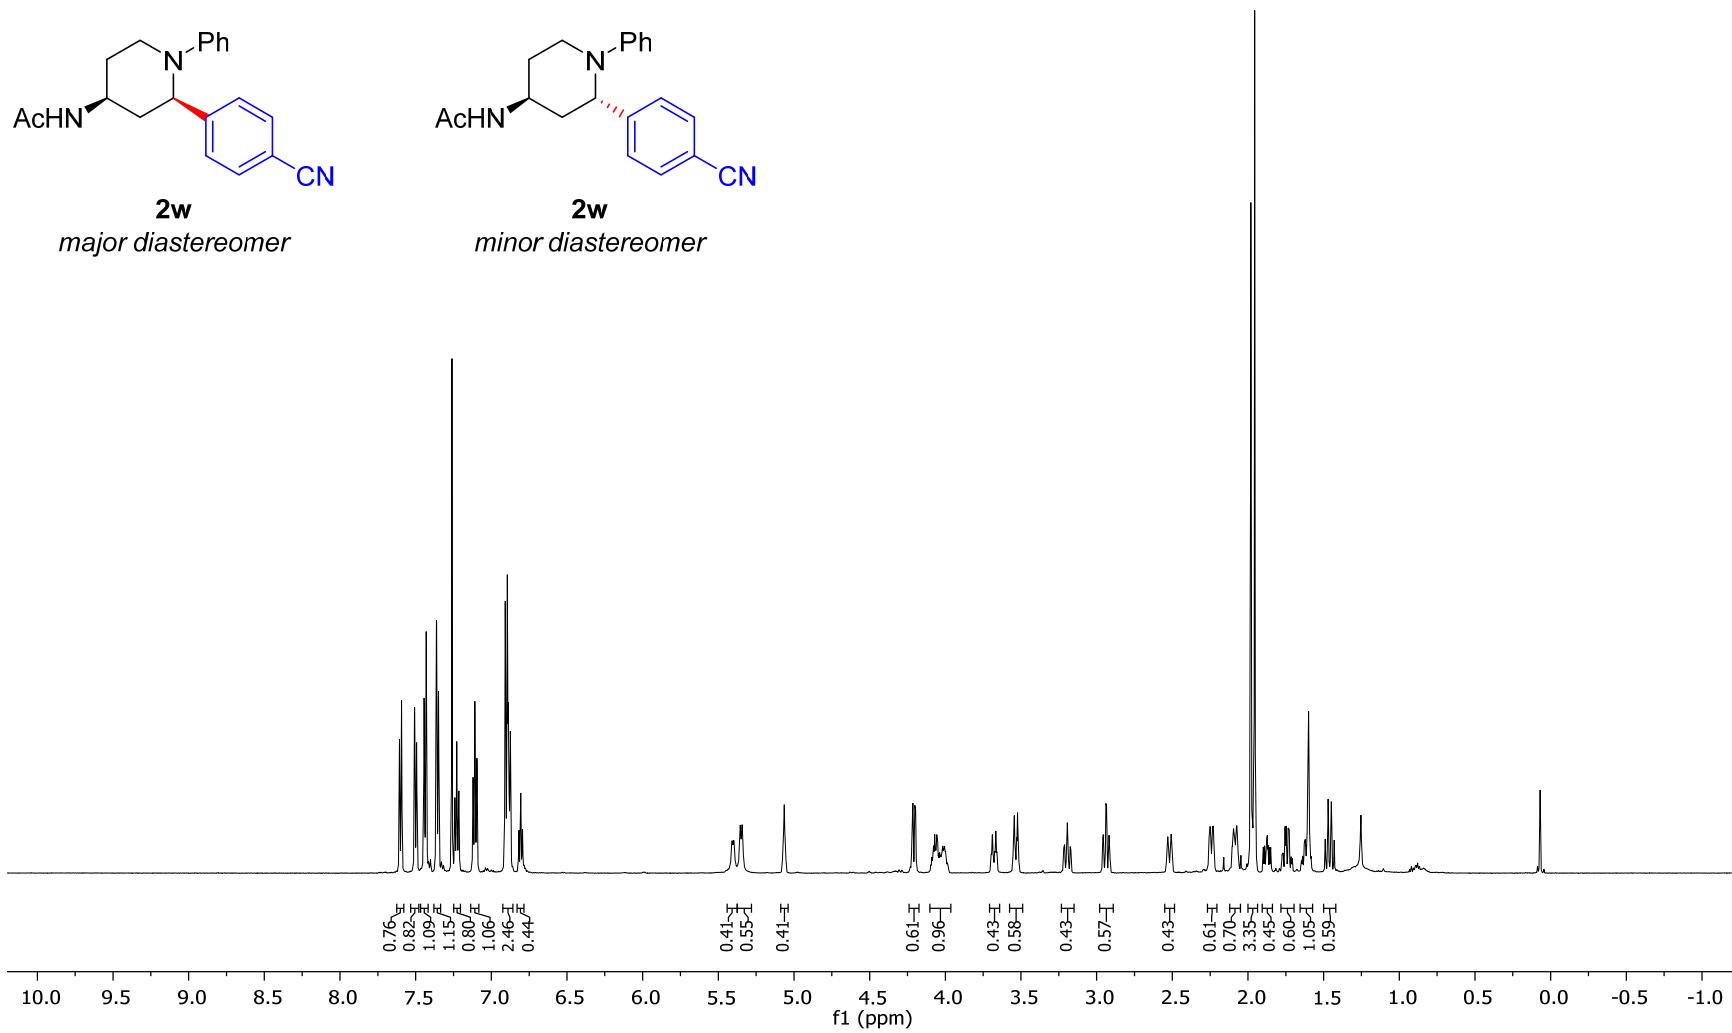

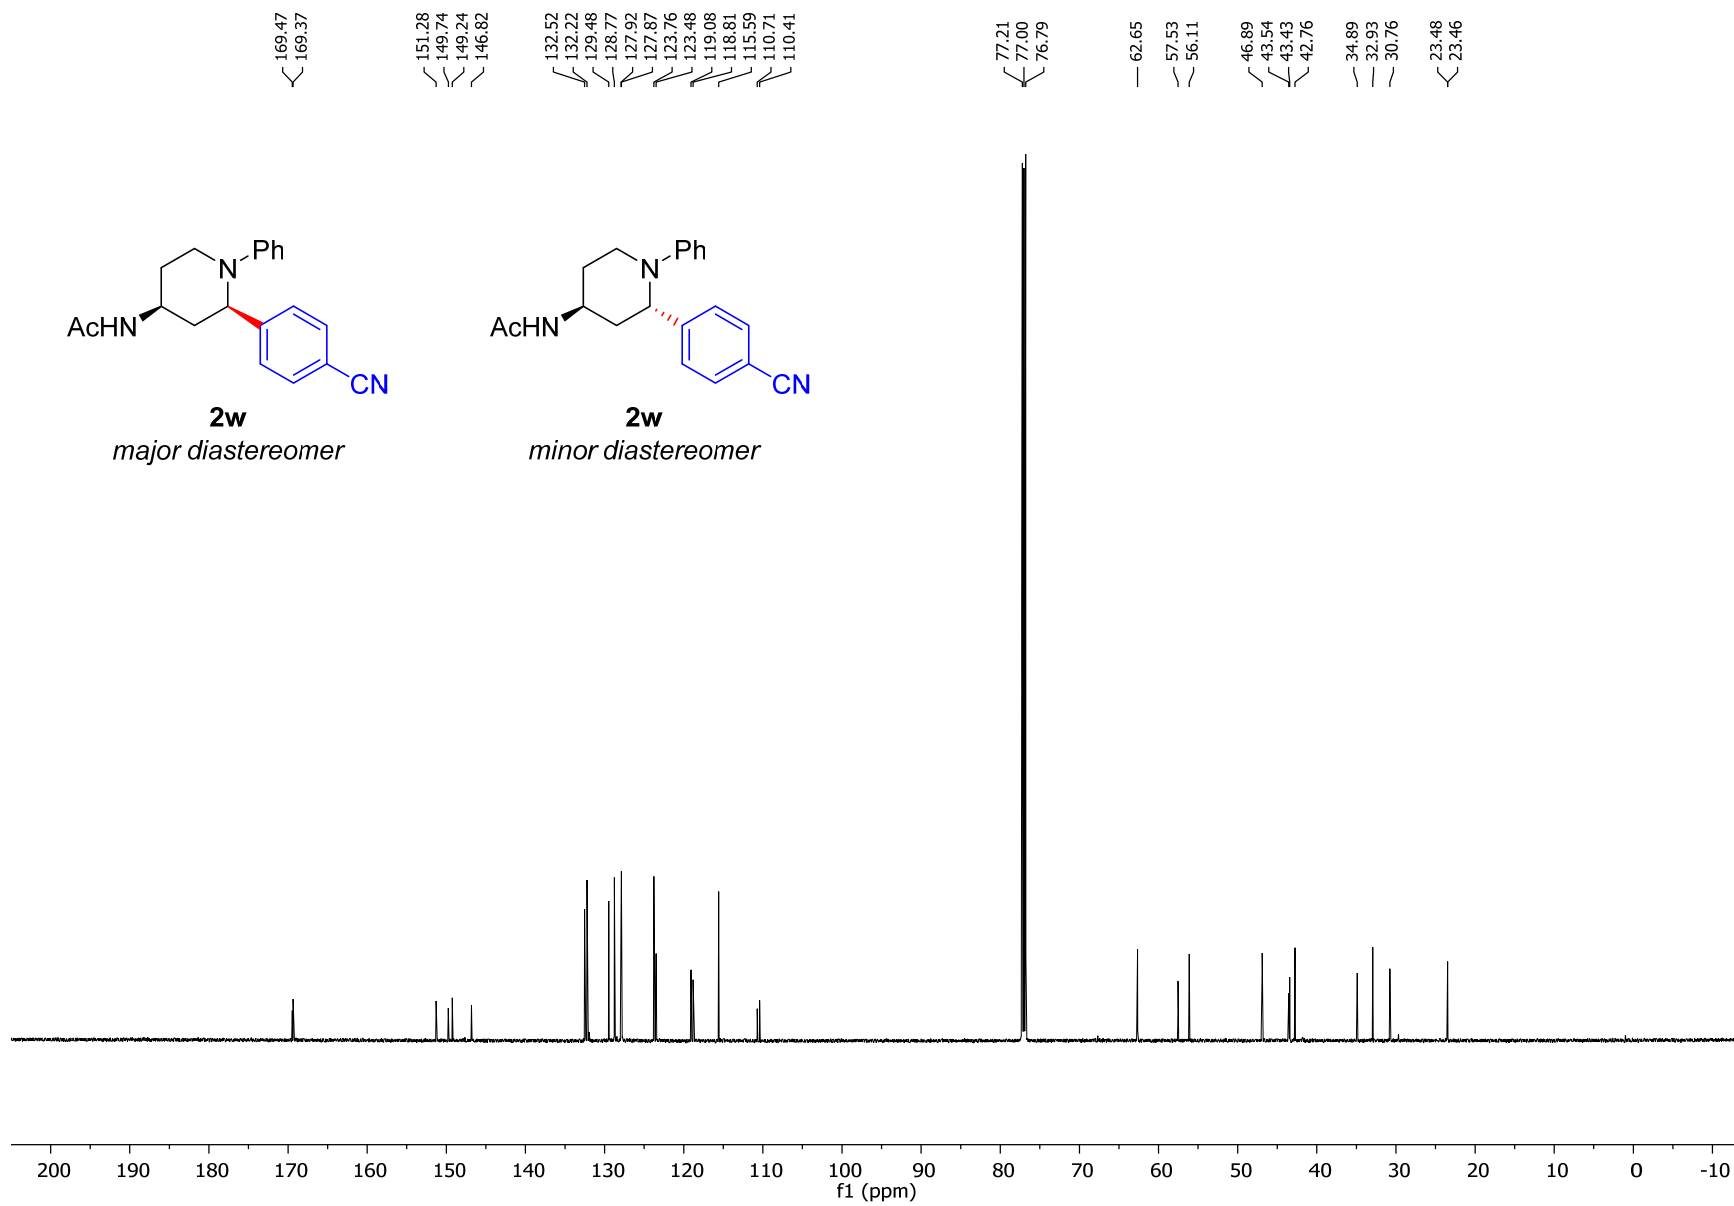

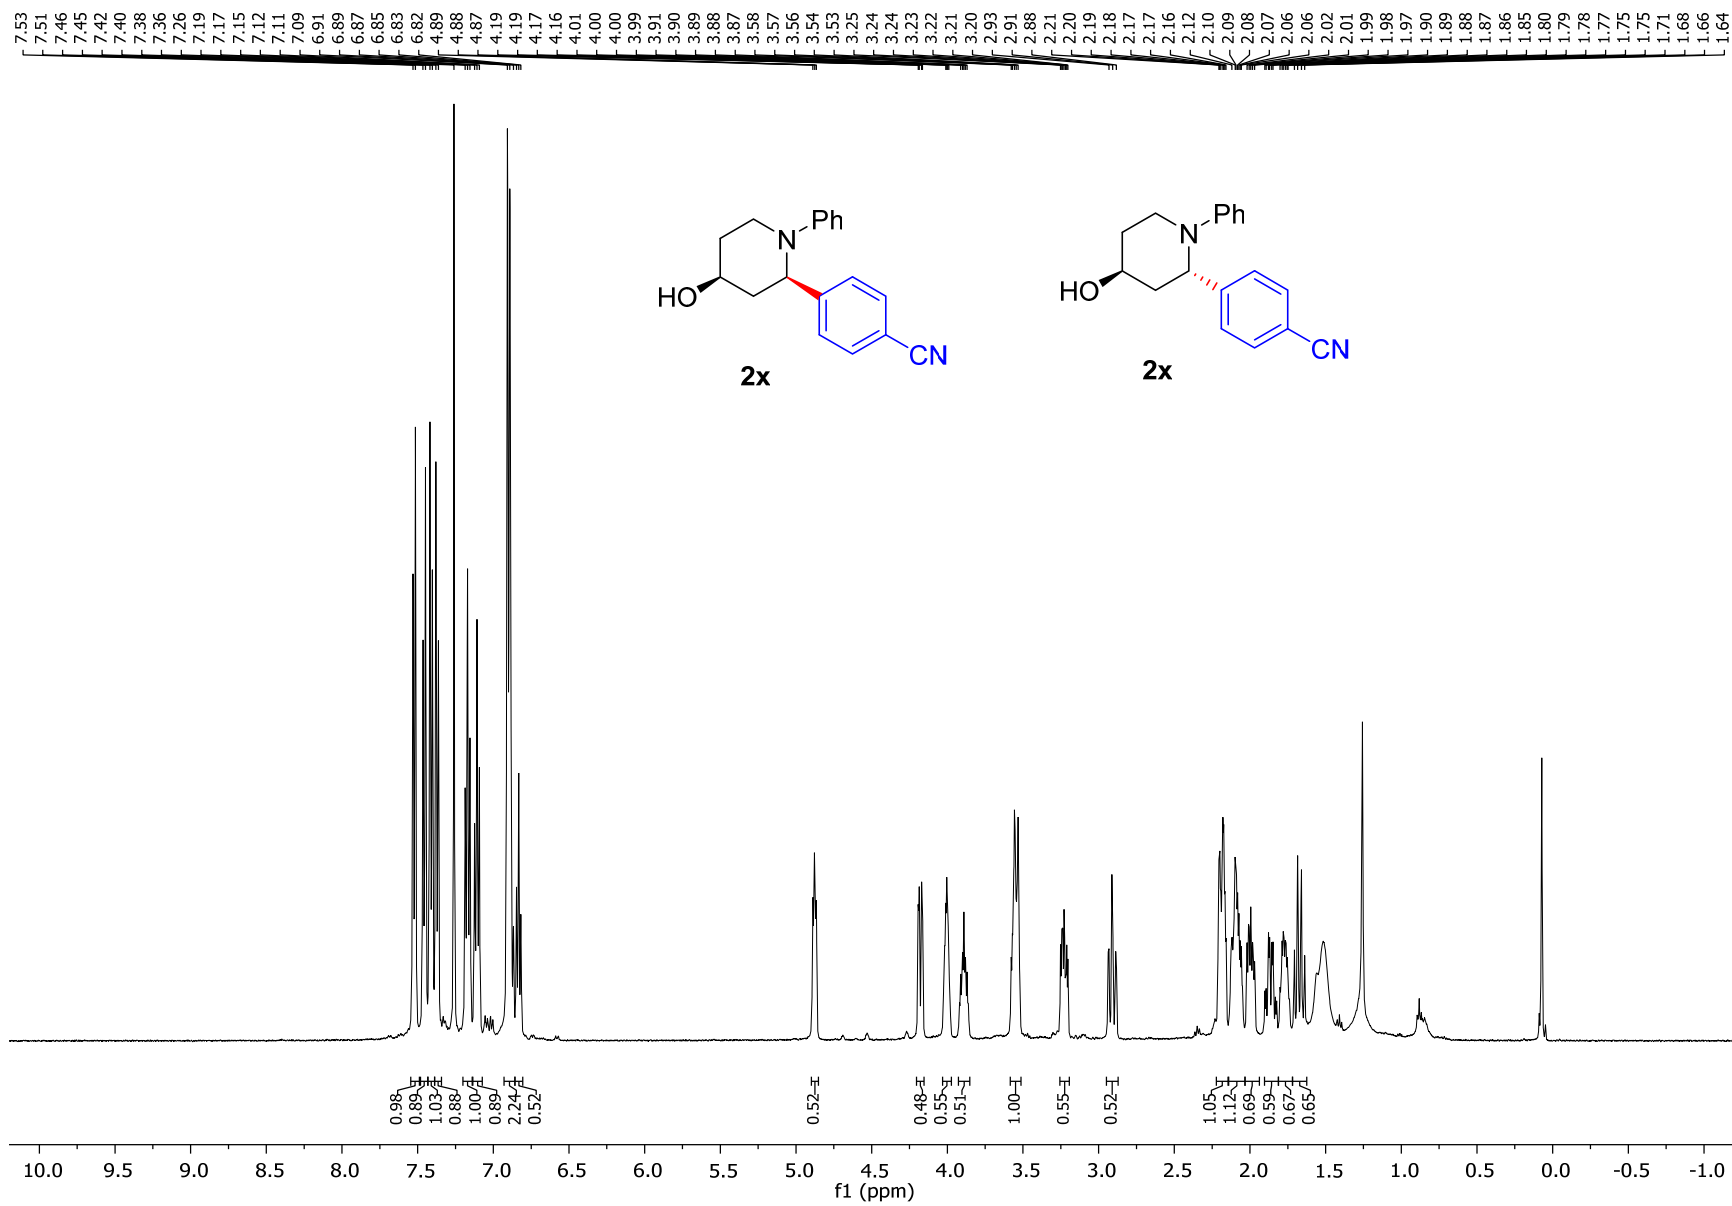

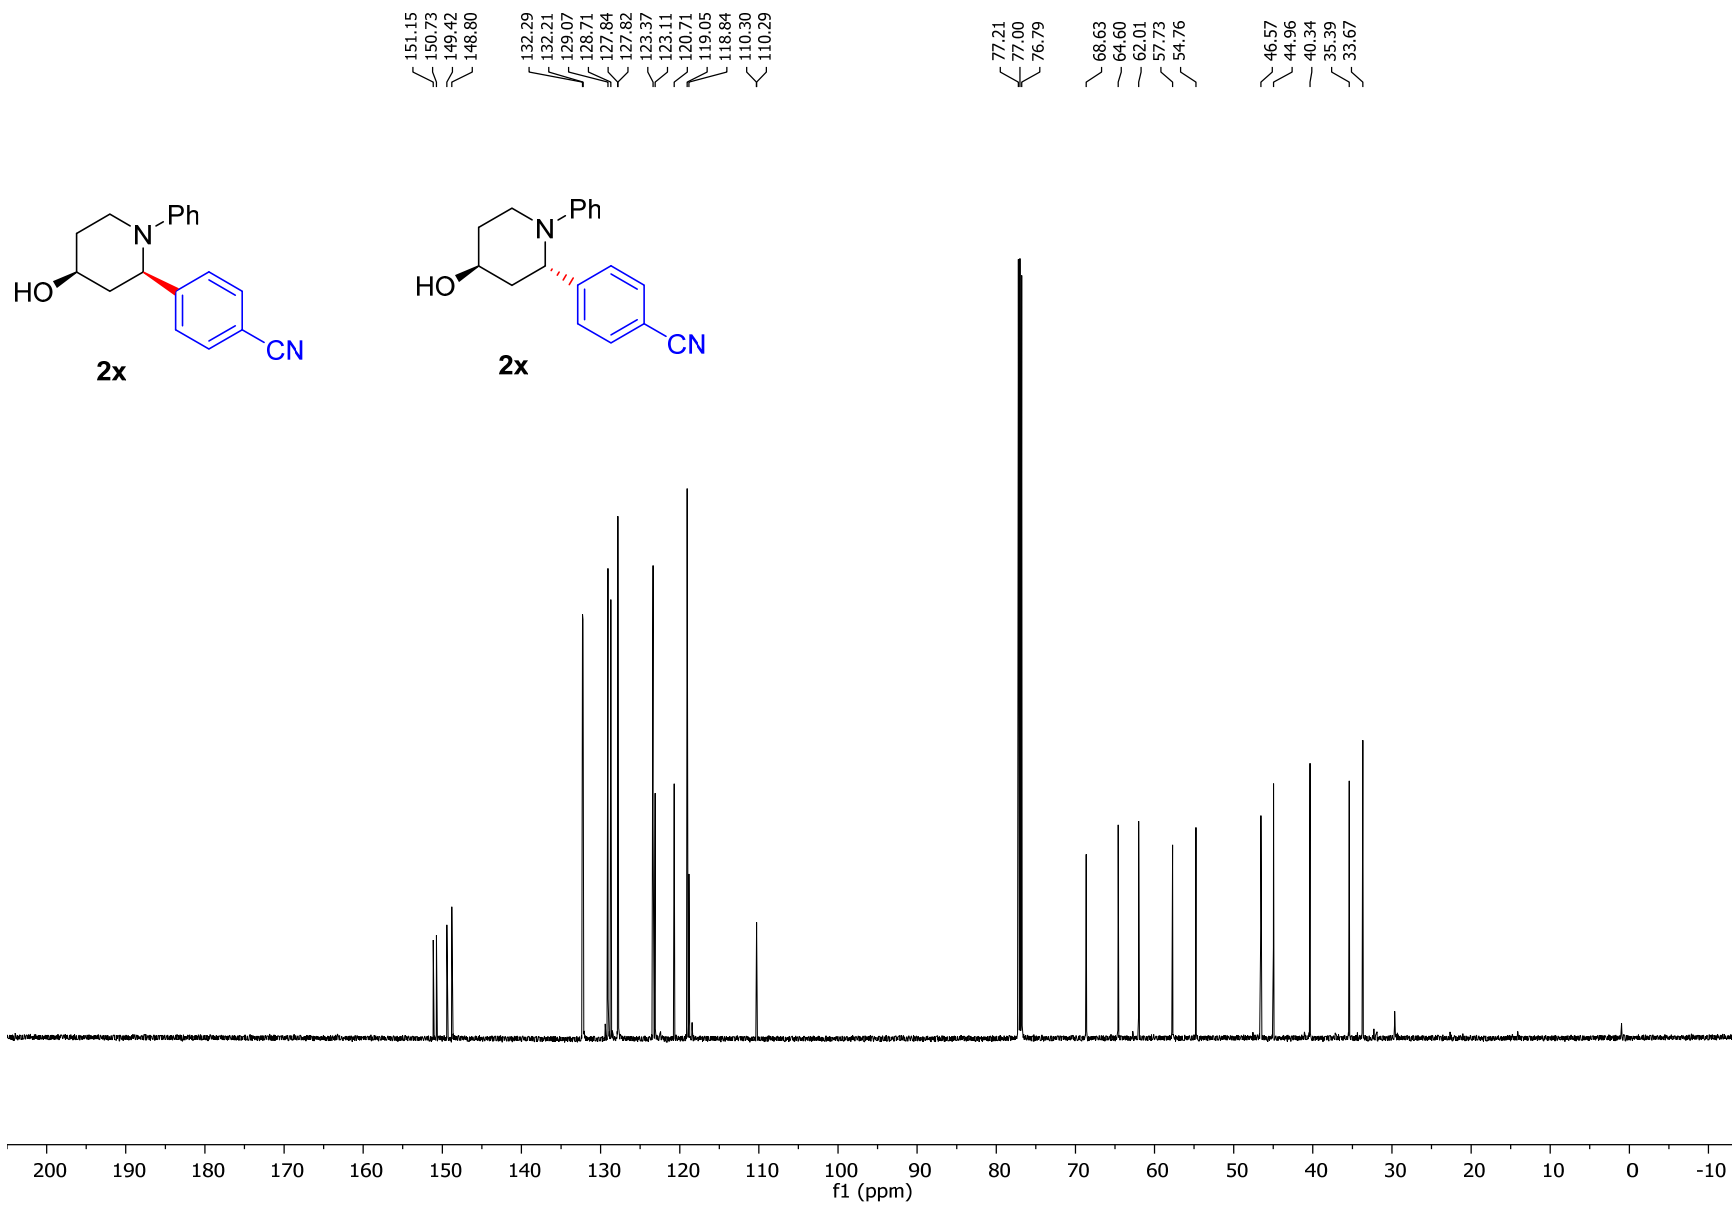

5.16  
5.15  
5.14  
4.12  
4.11  
4.10  
4.09  
3.81  
3.80  
3.79  
3.78  
3.77  
3.76  
3.25  
3.23  
3.20  
2.89  
2.86  
2.84

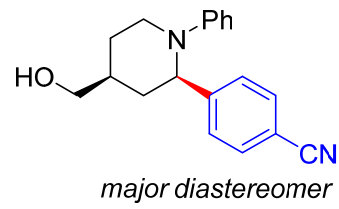

+

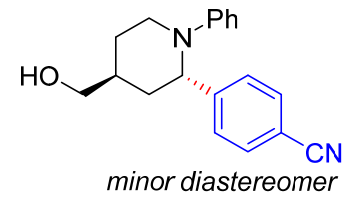

**2y**  
**Isolated mixture**  
**<sup>1</sup>H NMR - CDCl<sub>3</sub>**  
**500 MHz**

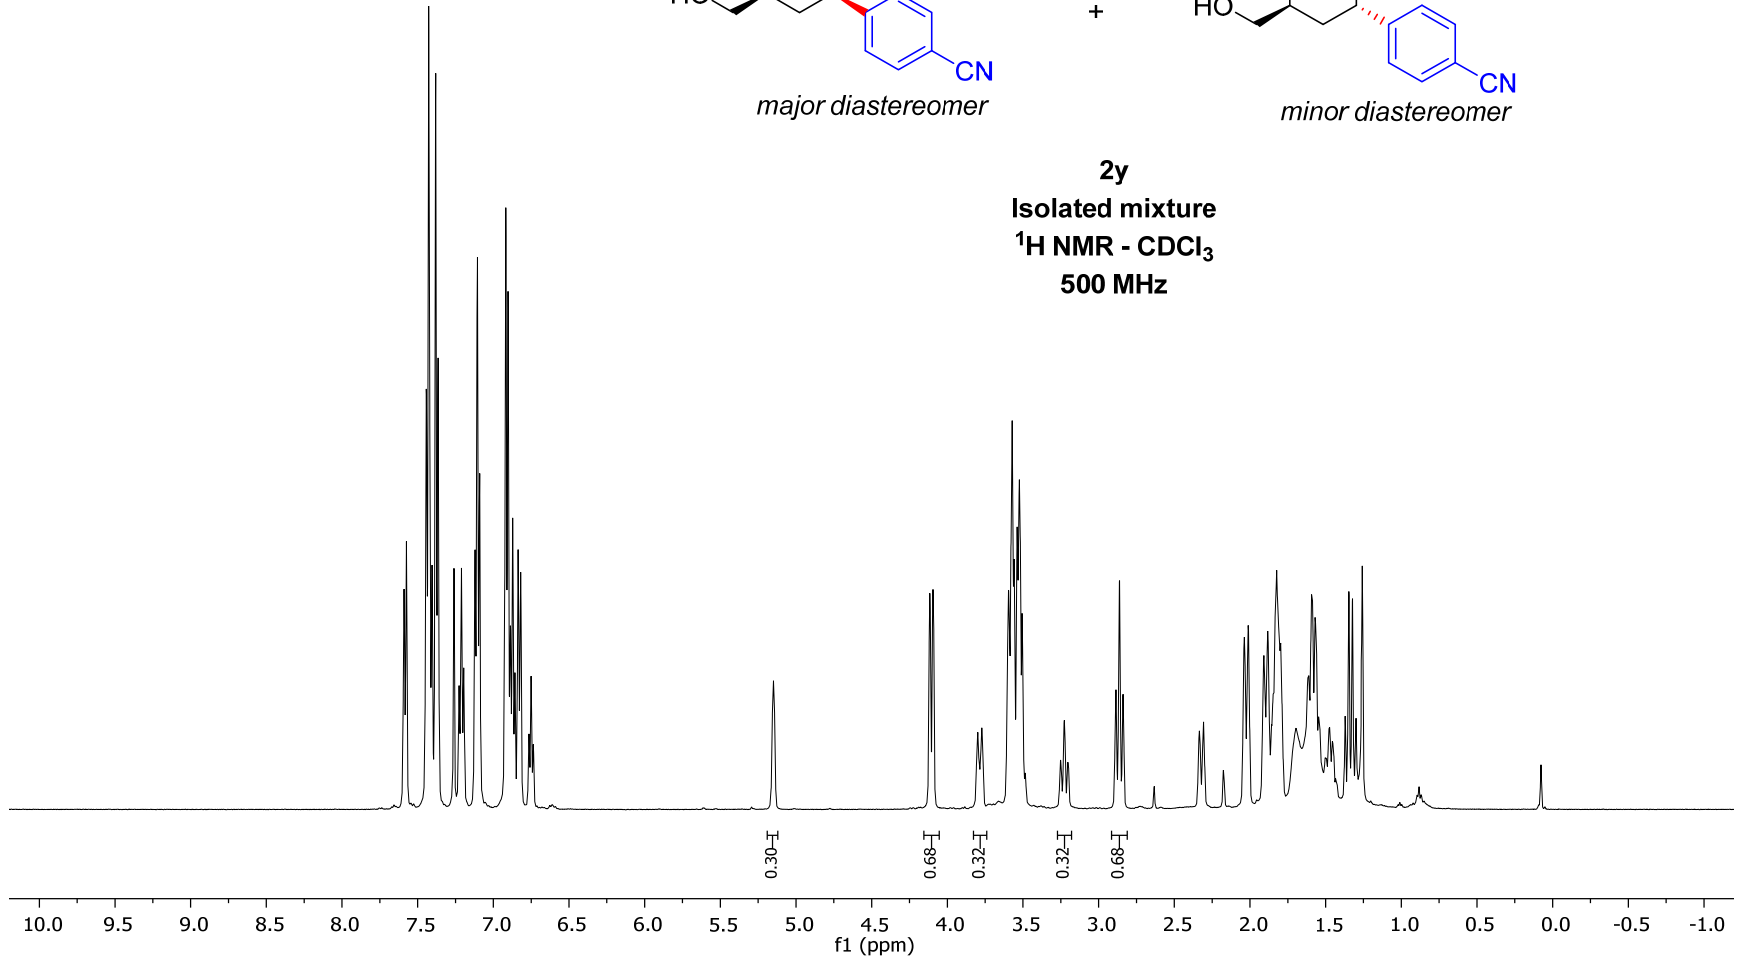

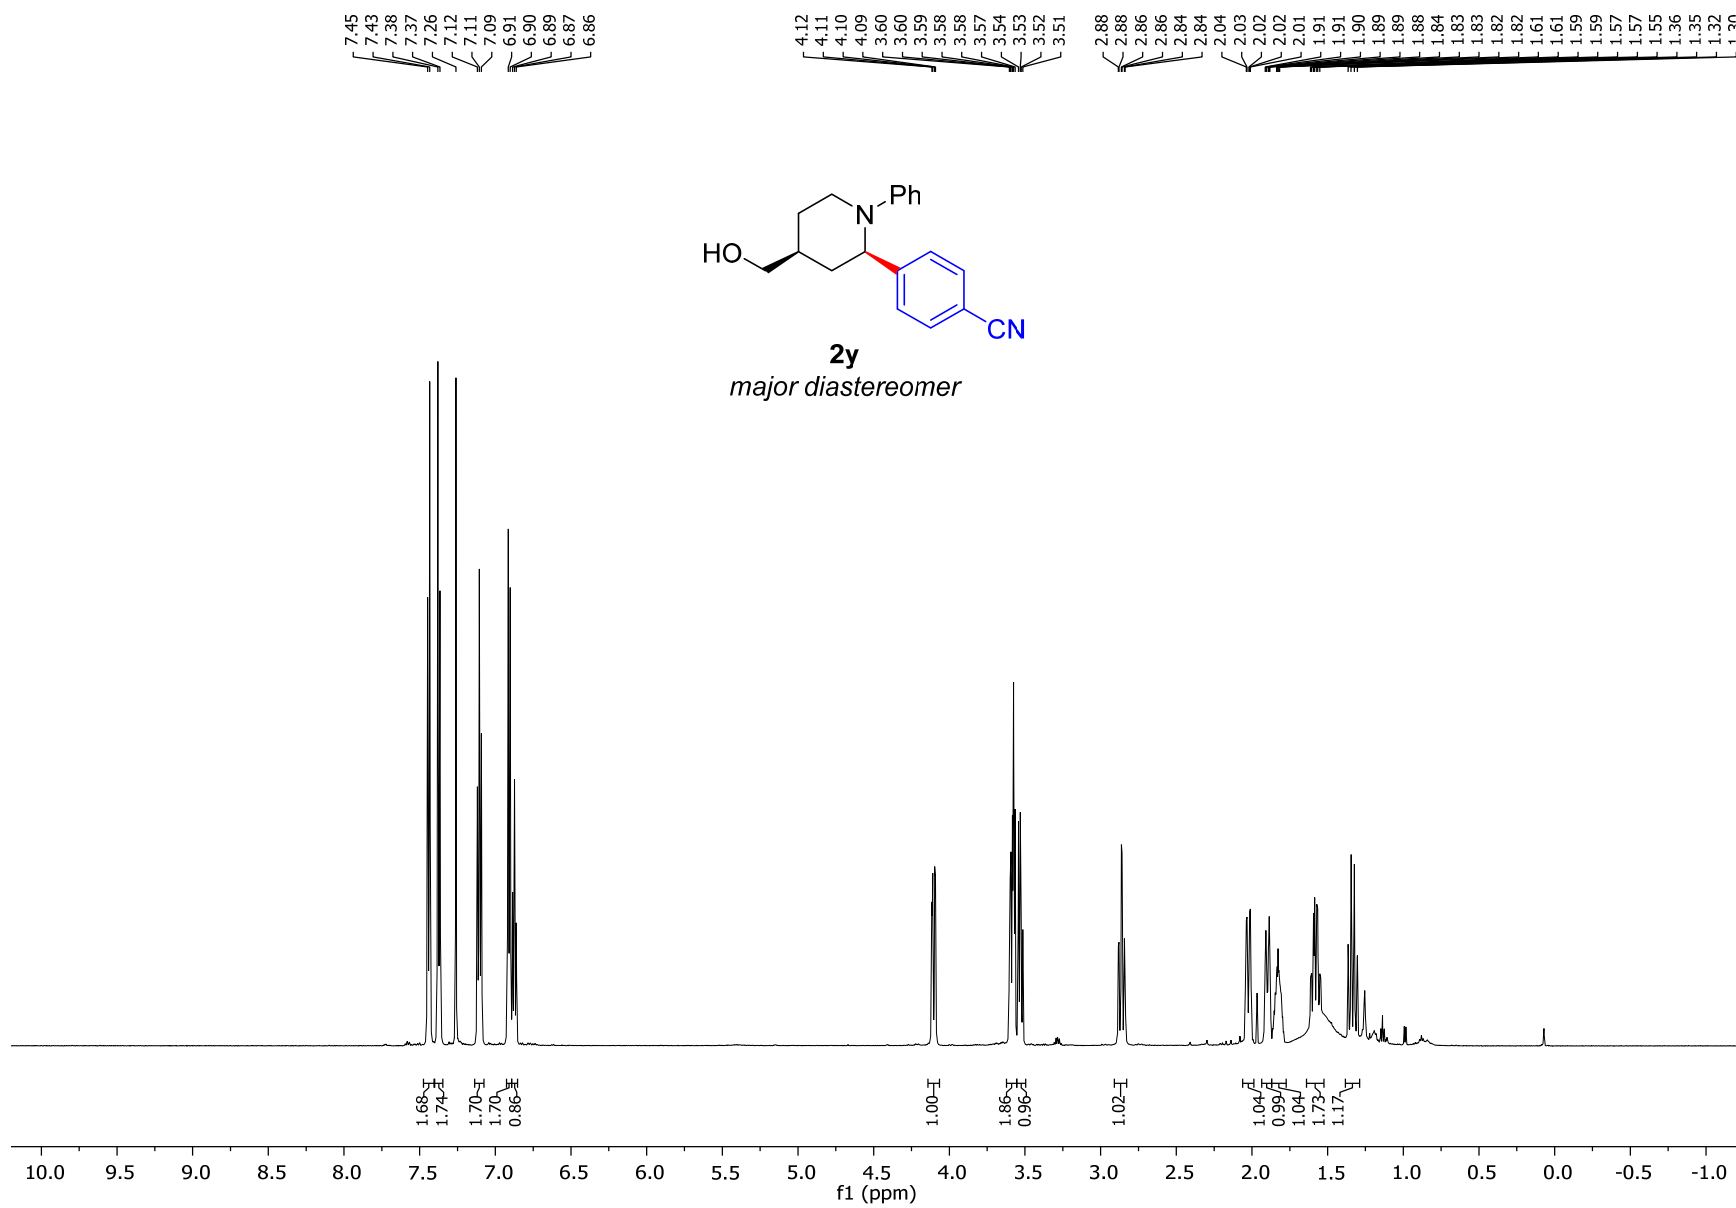

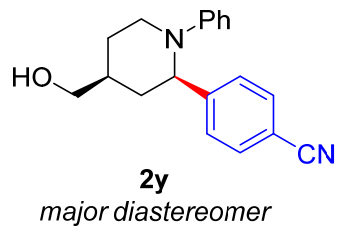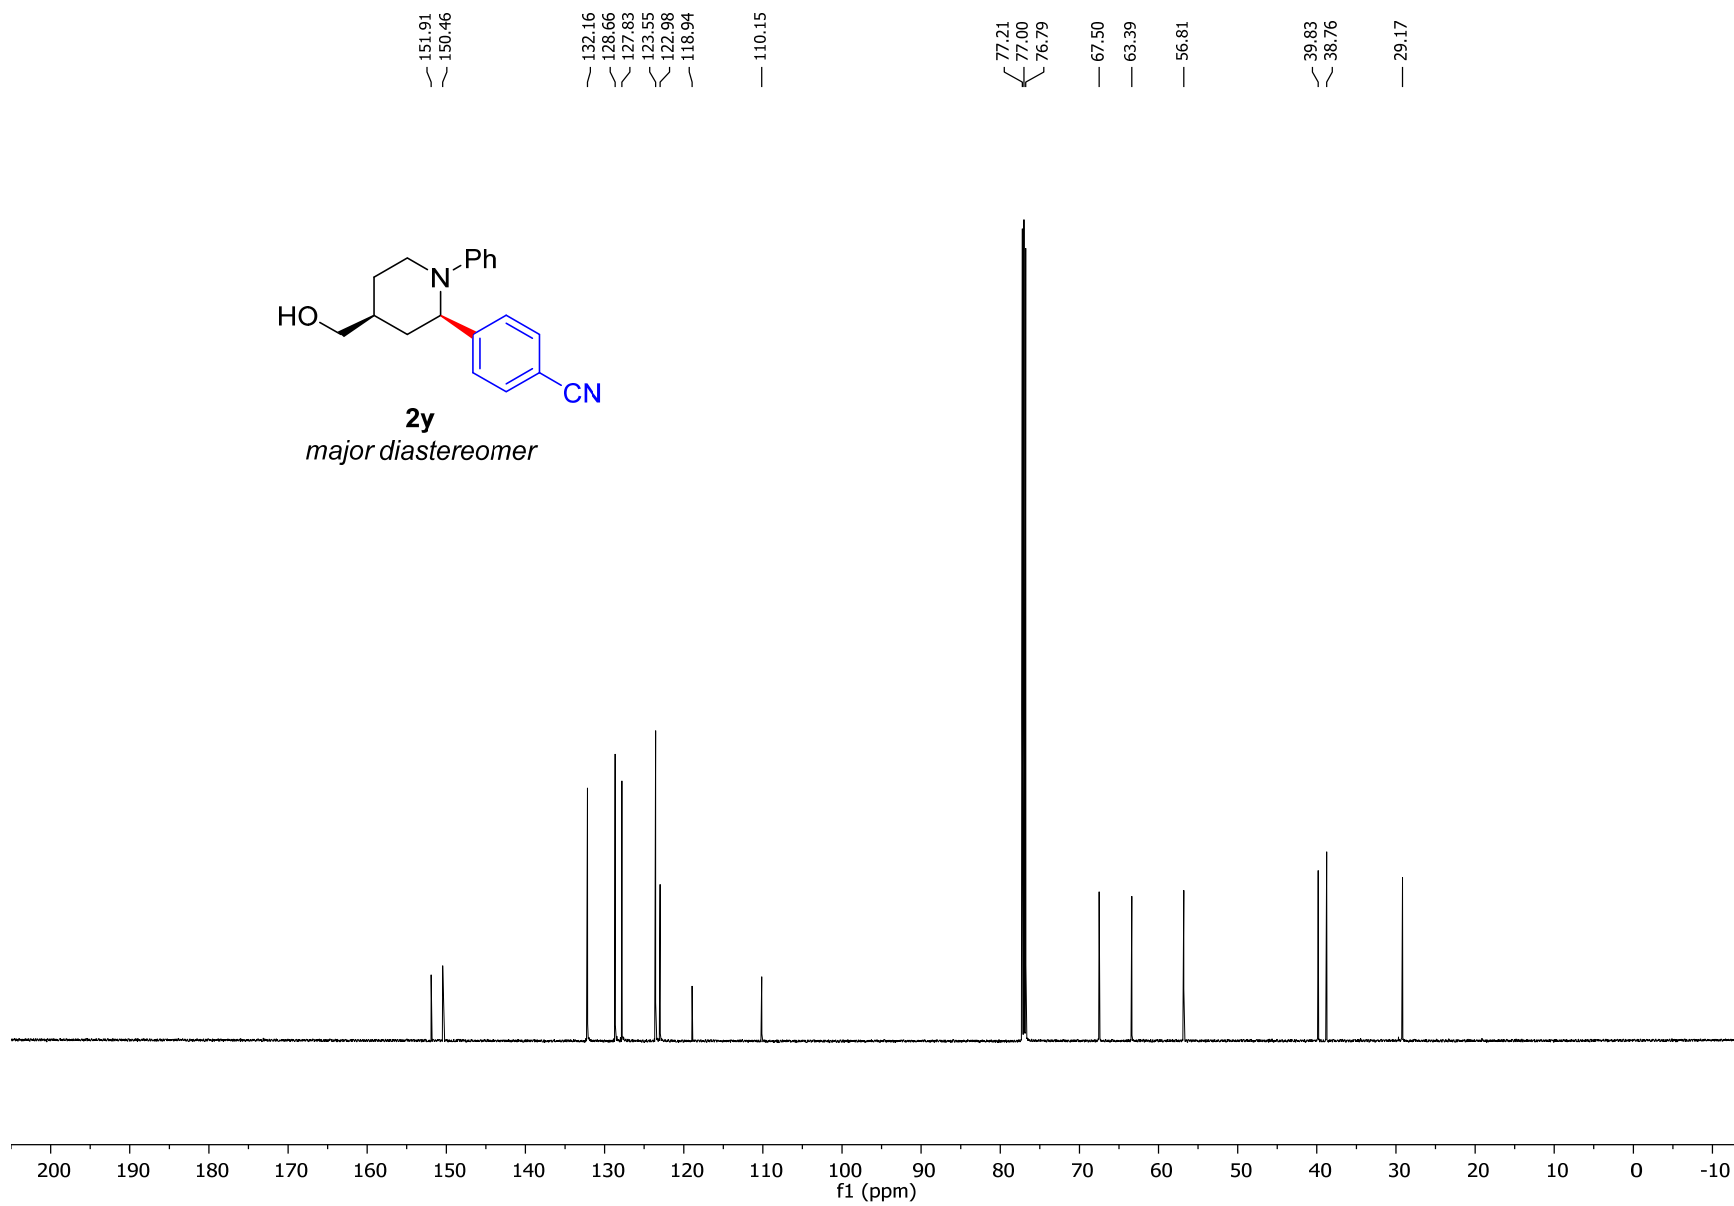

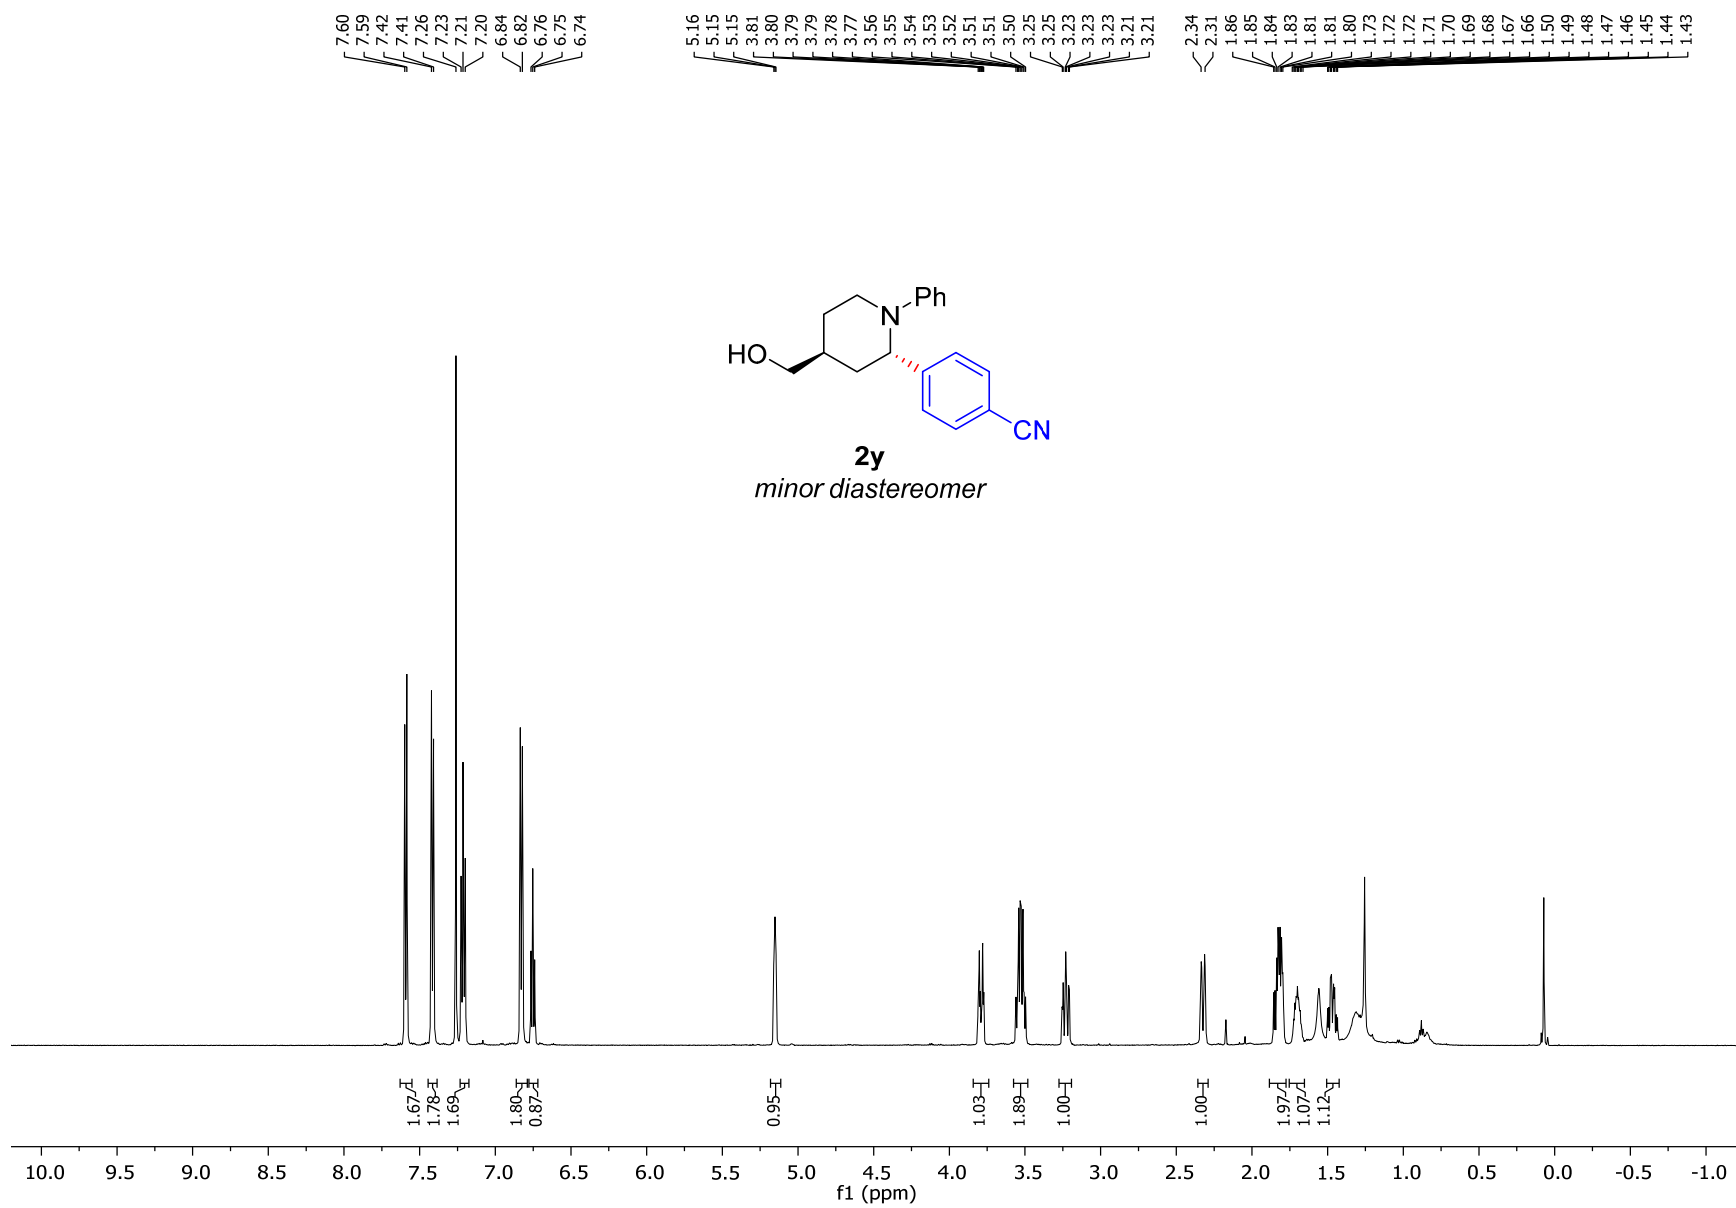



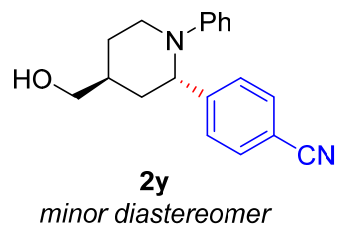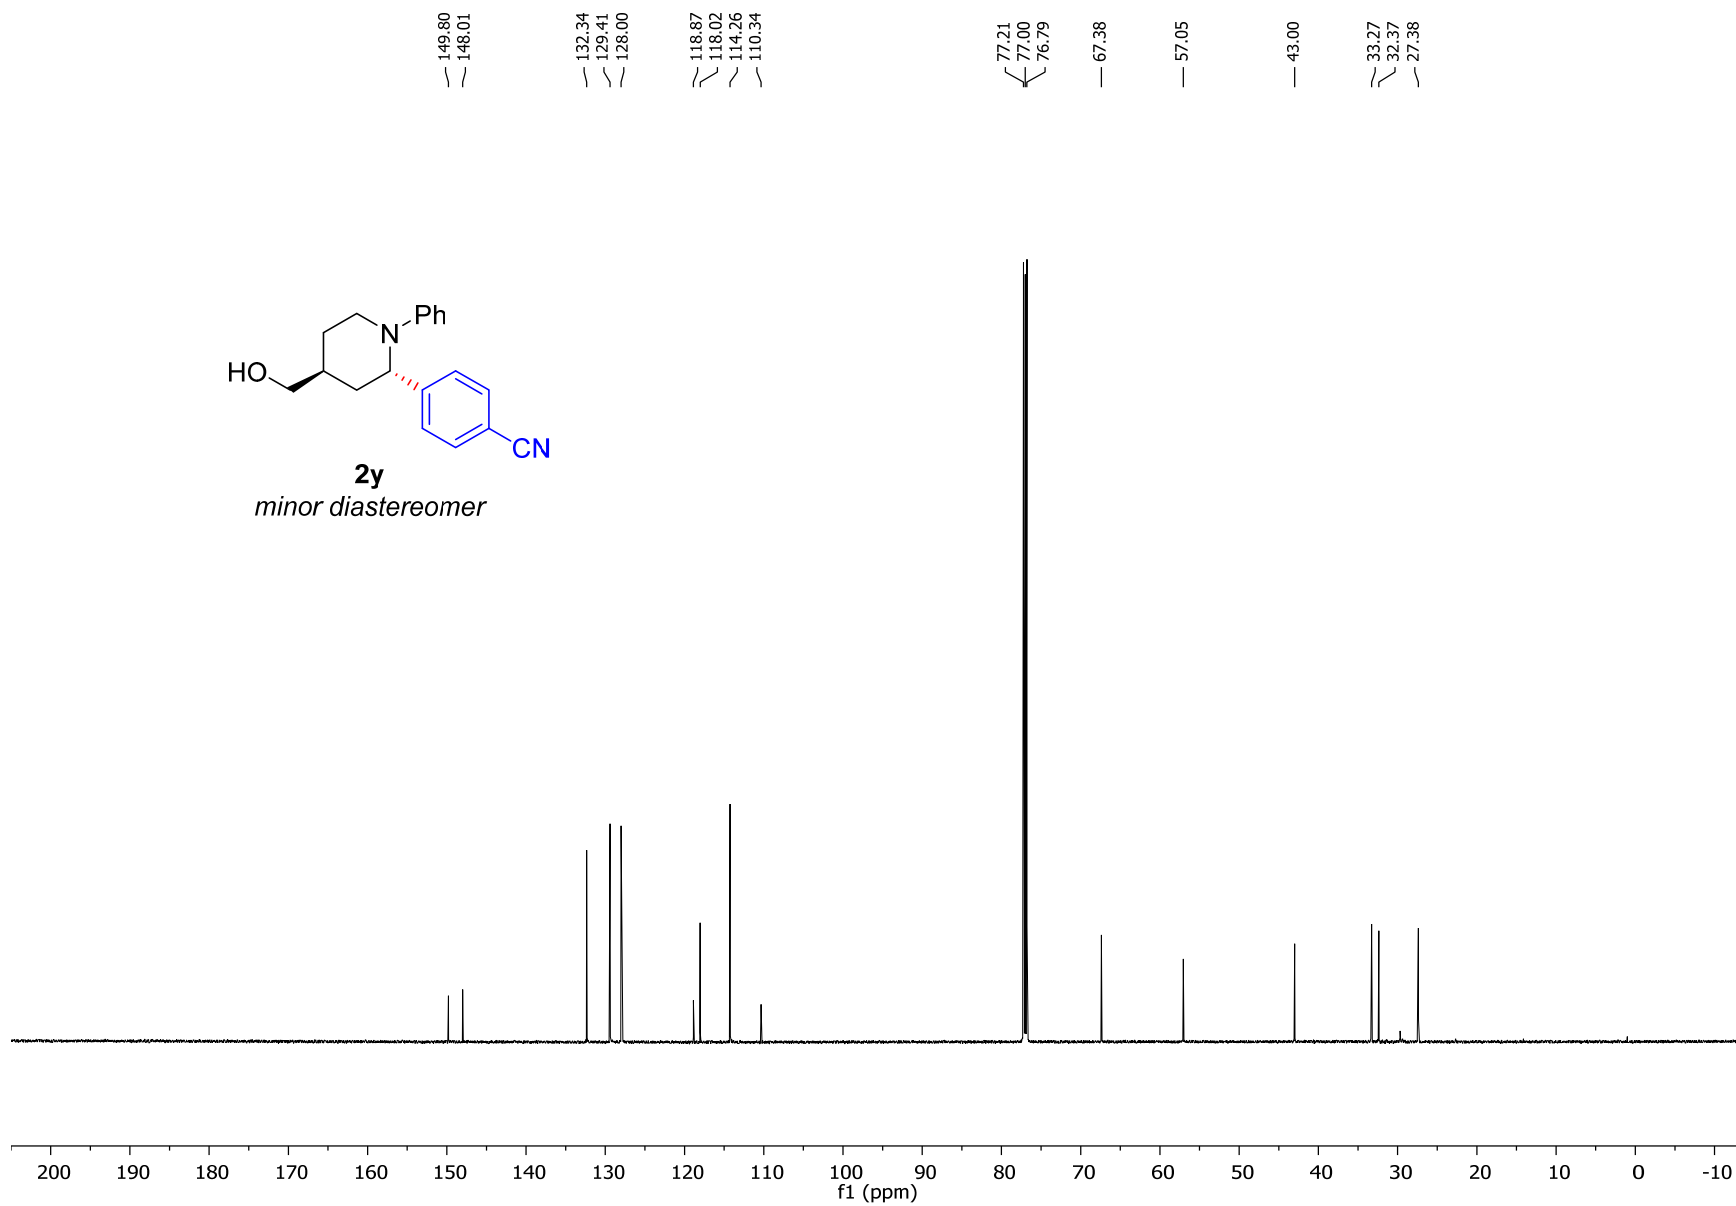

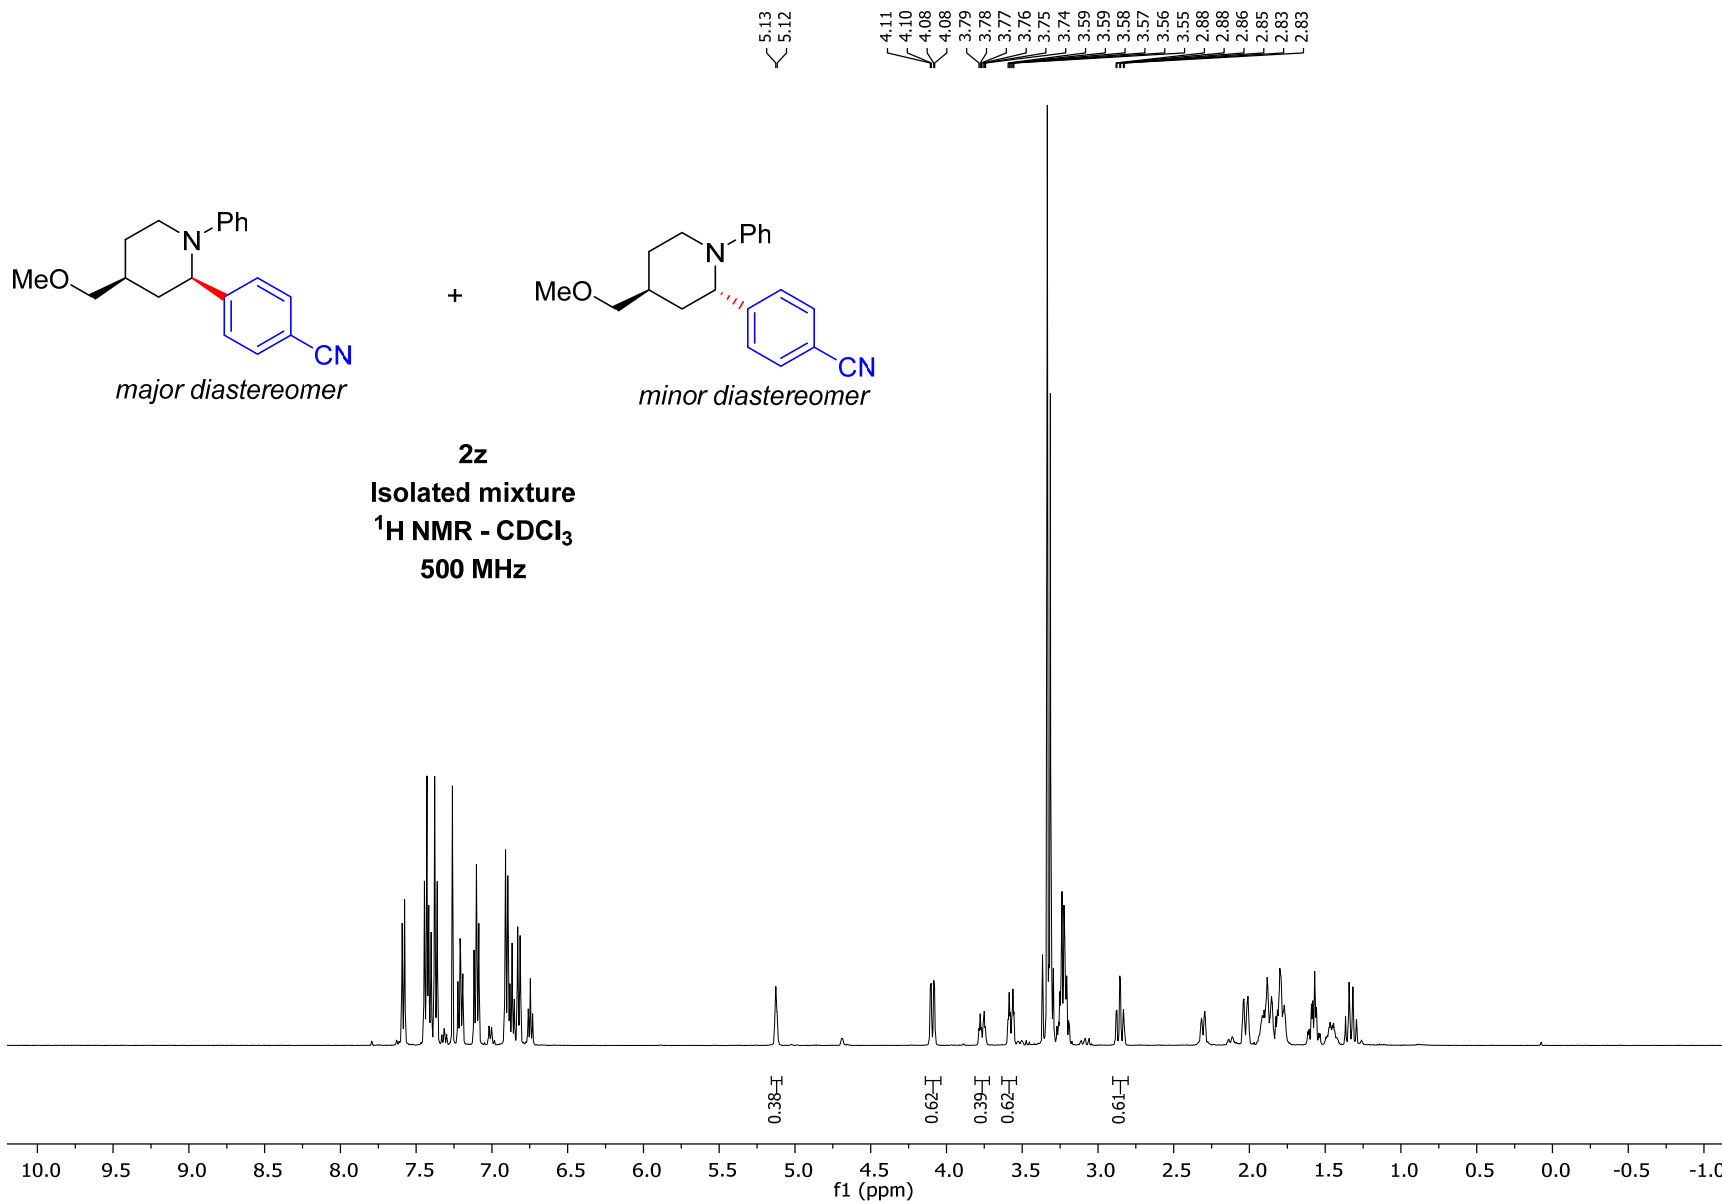

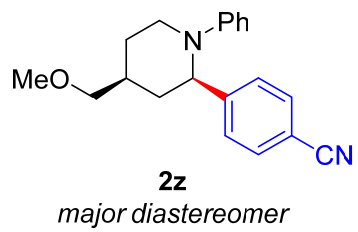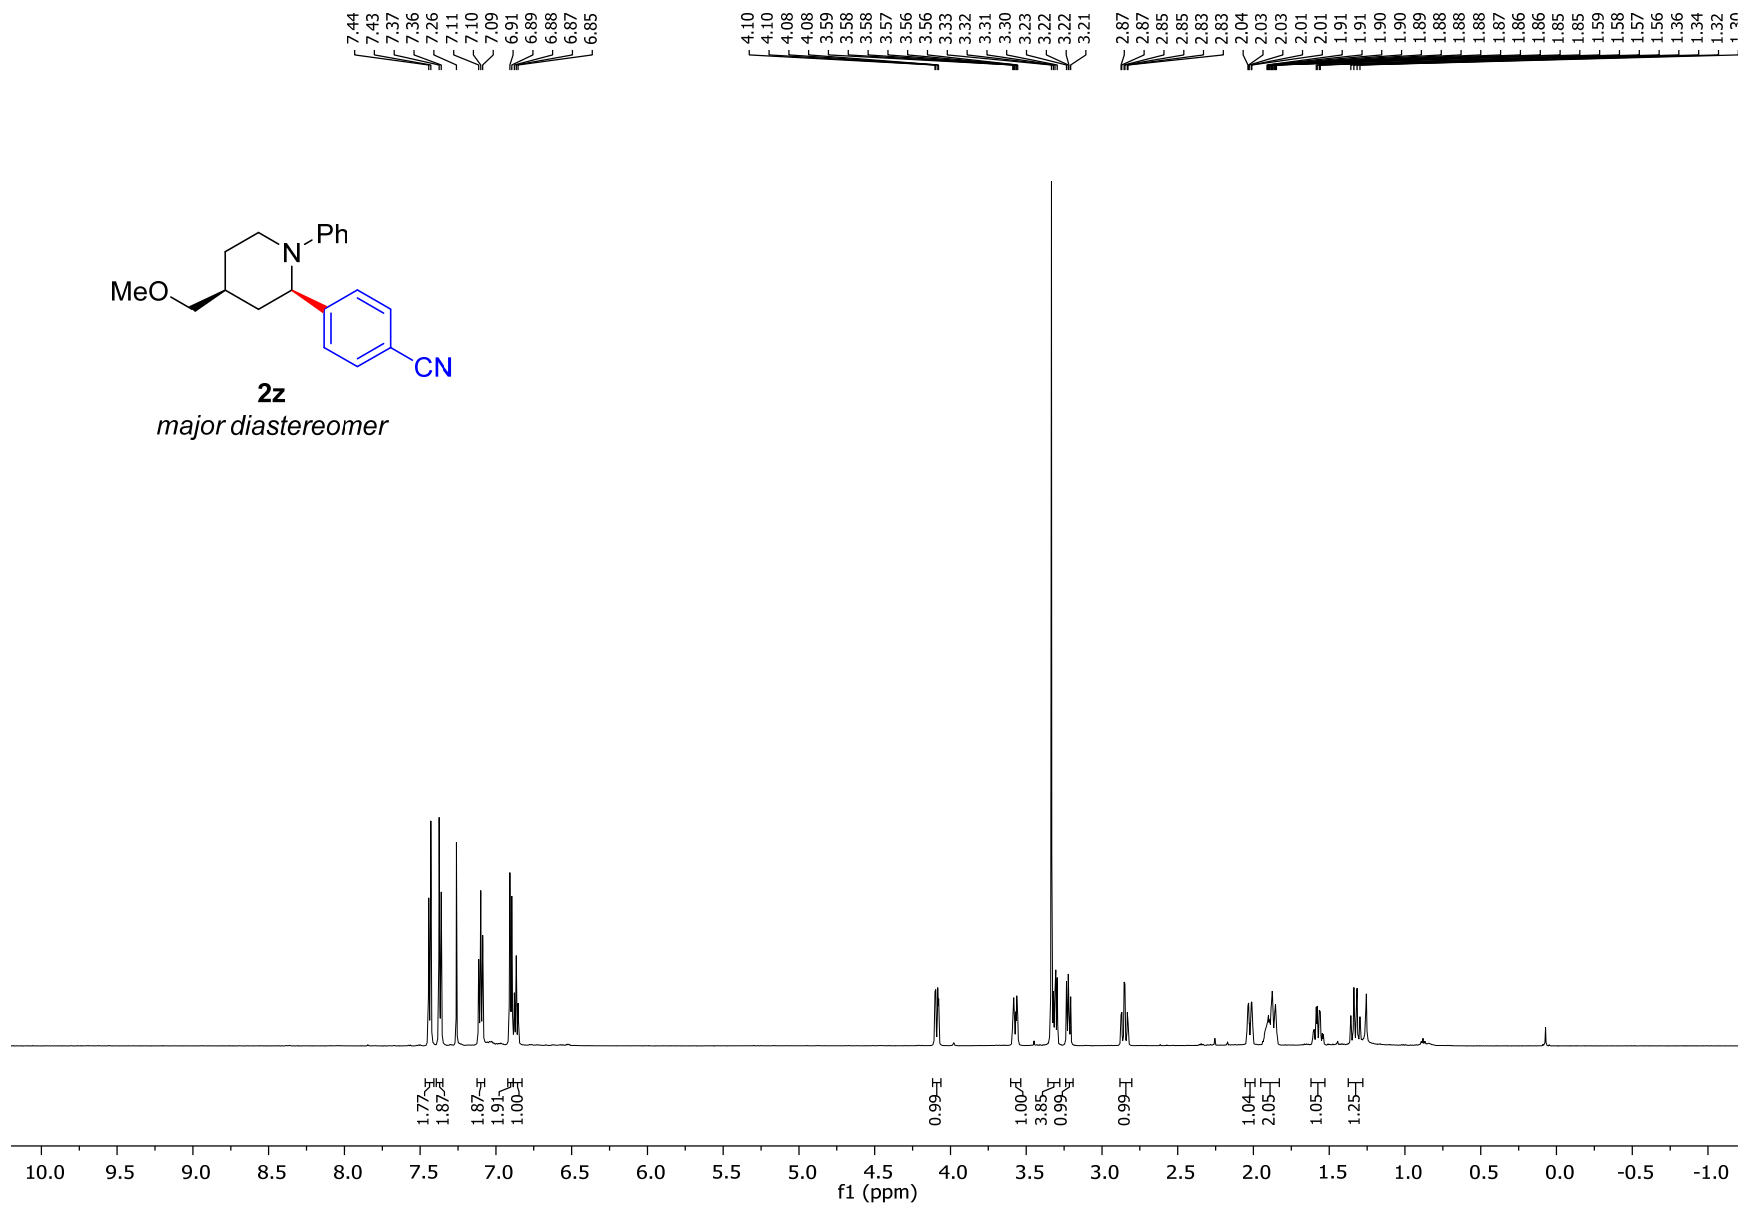

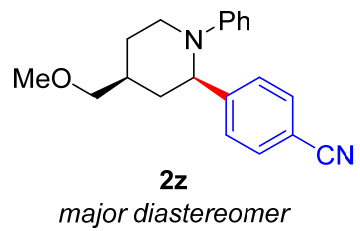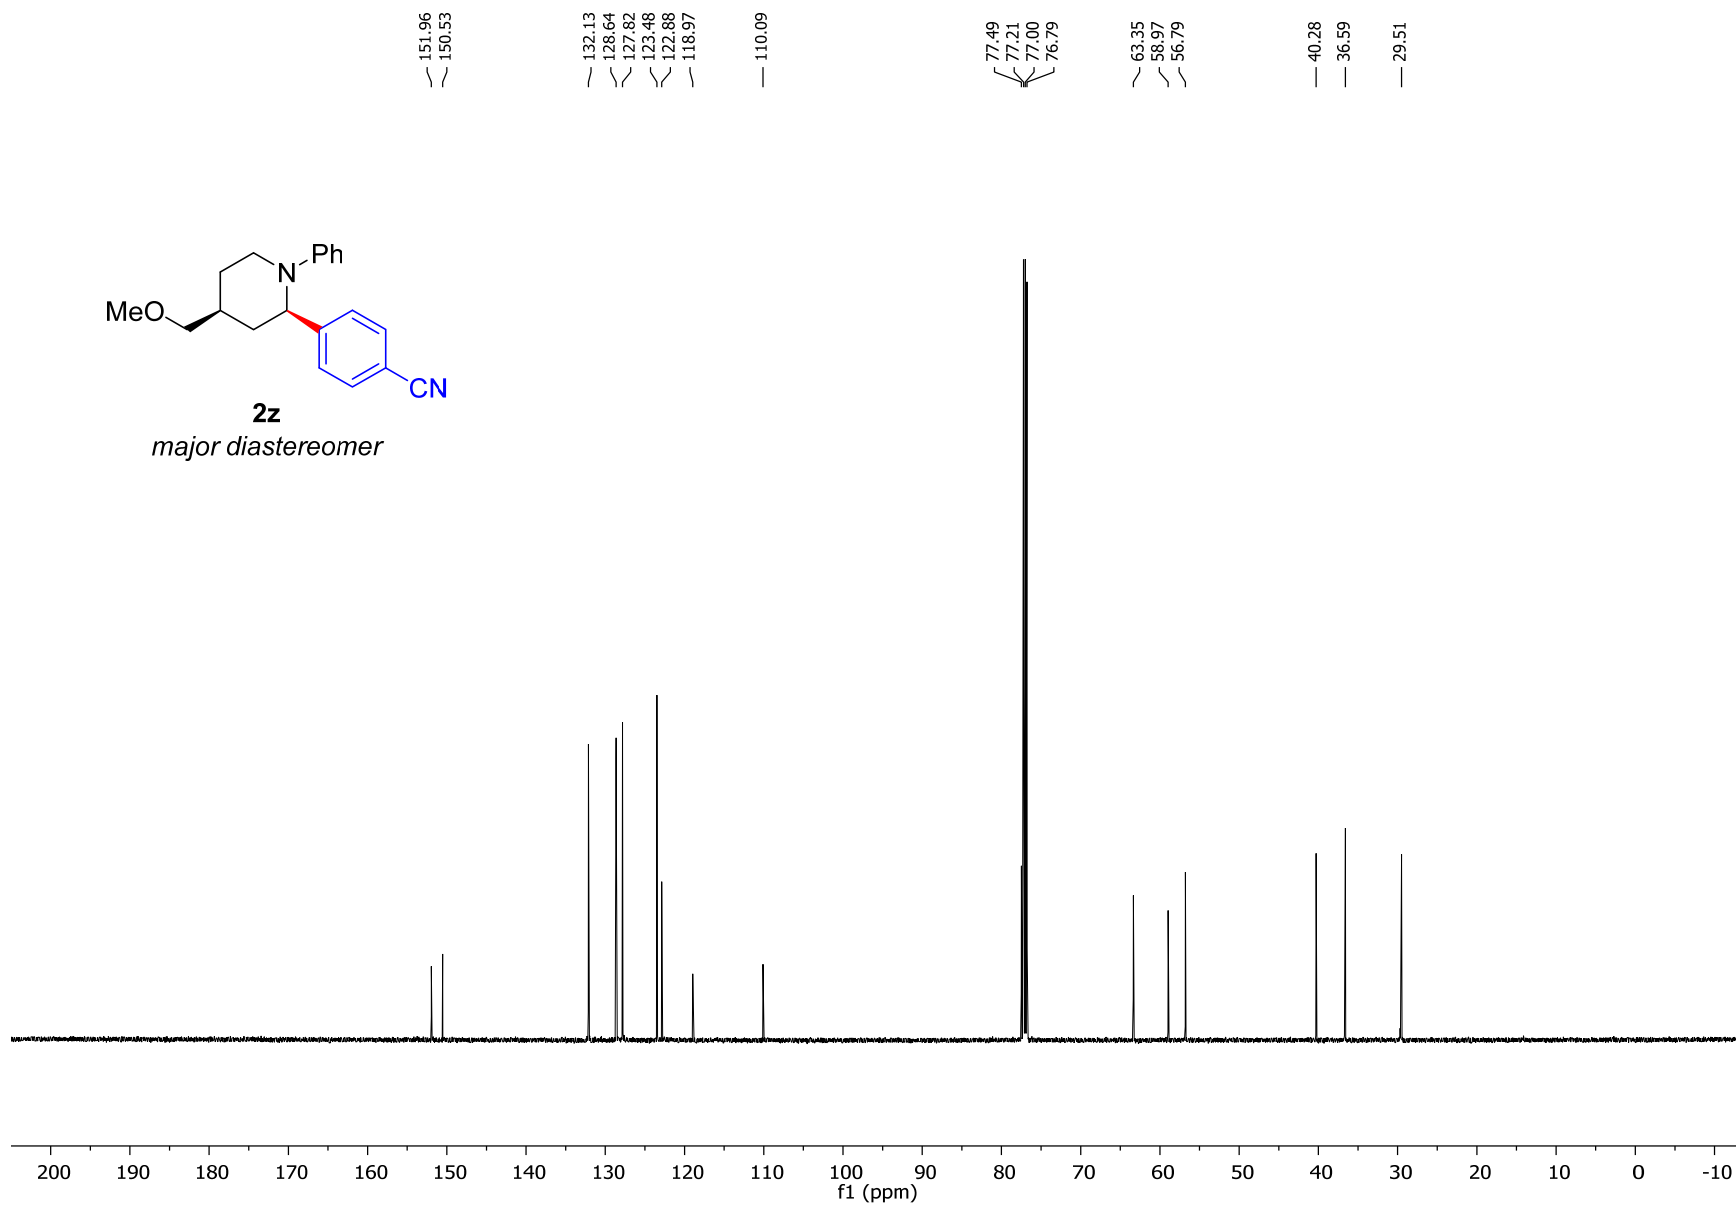

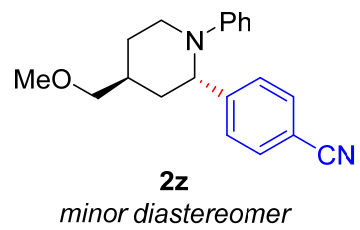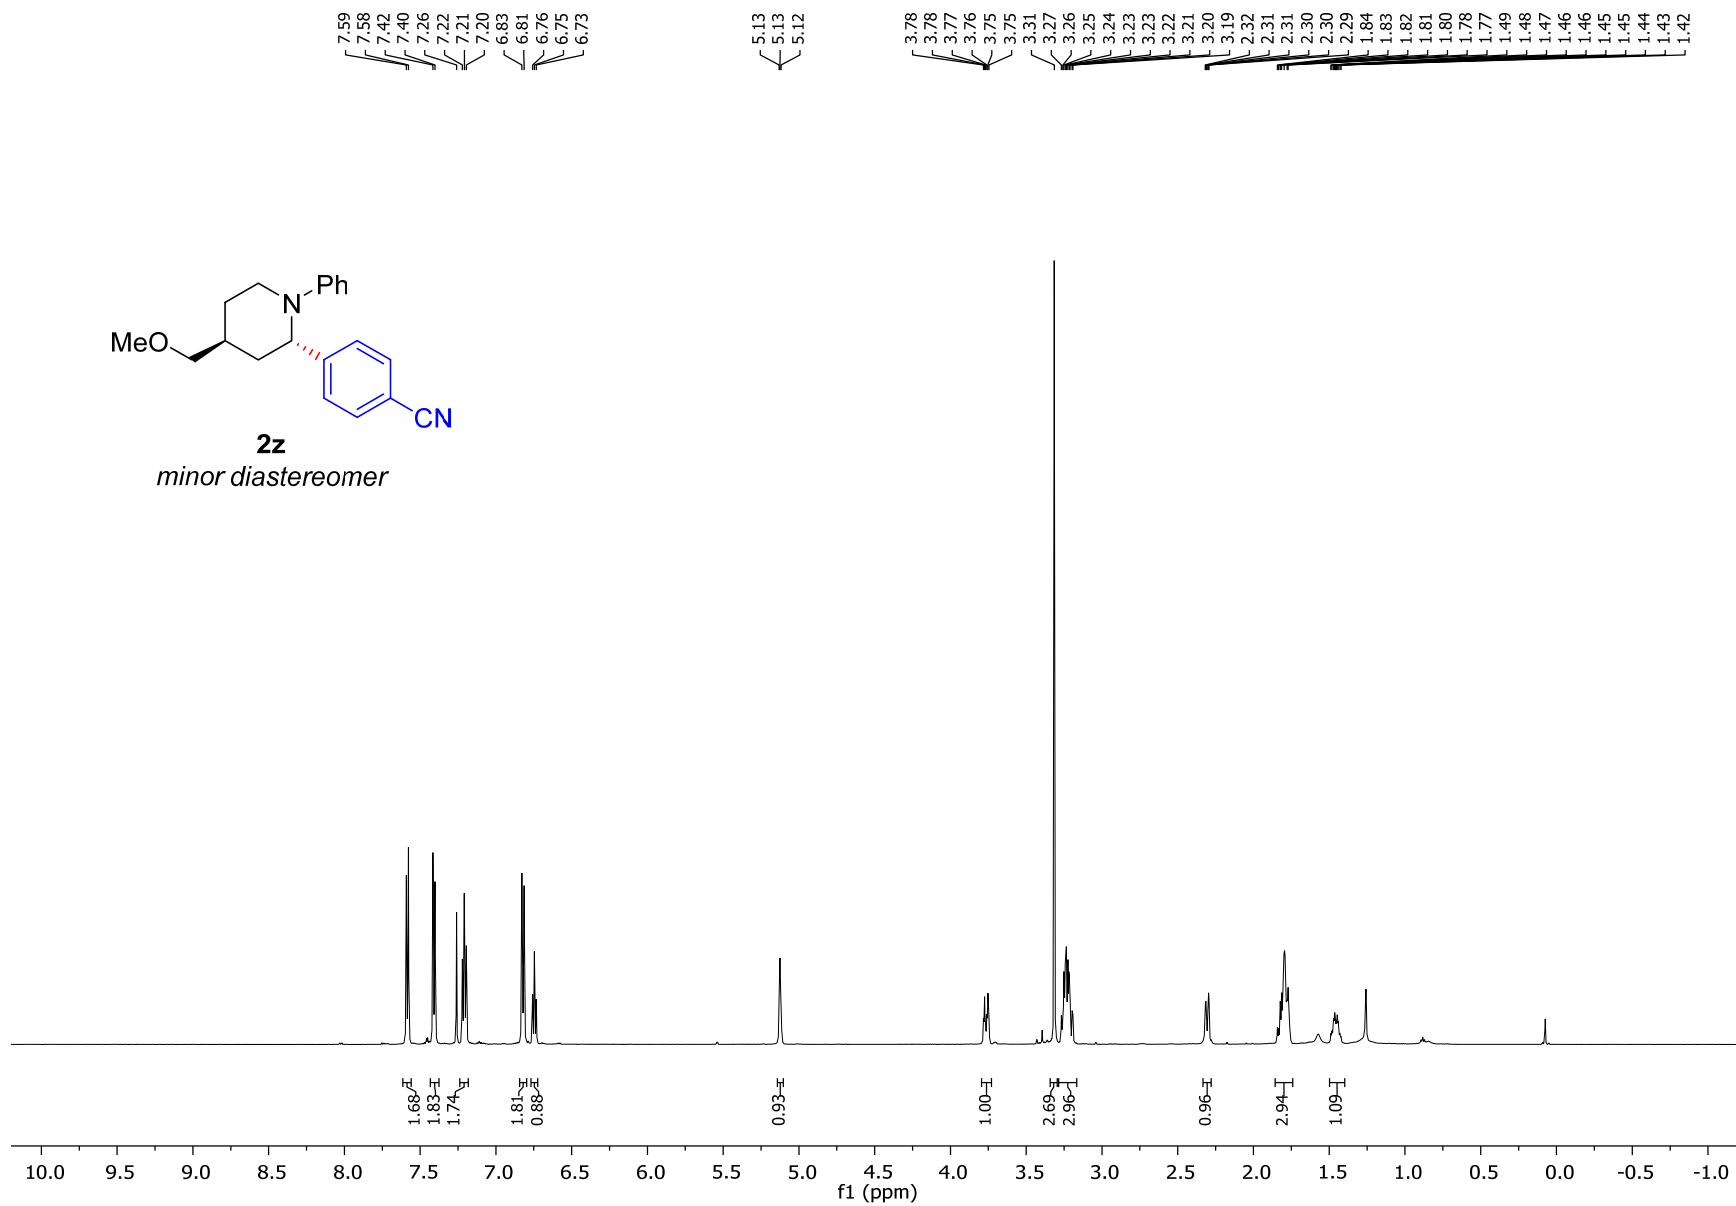

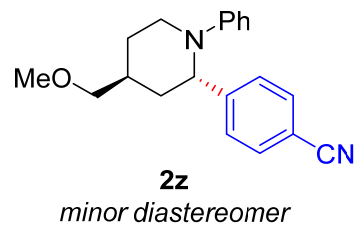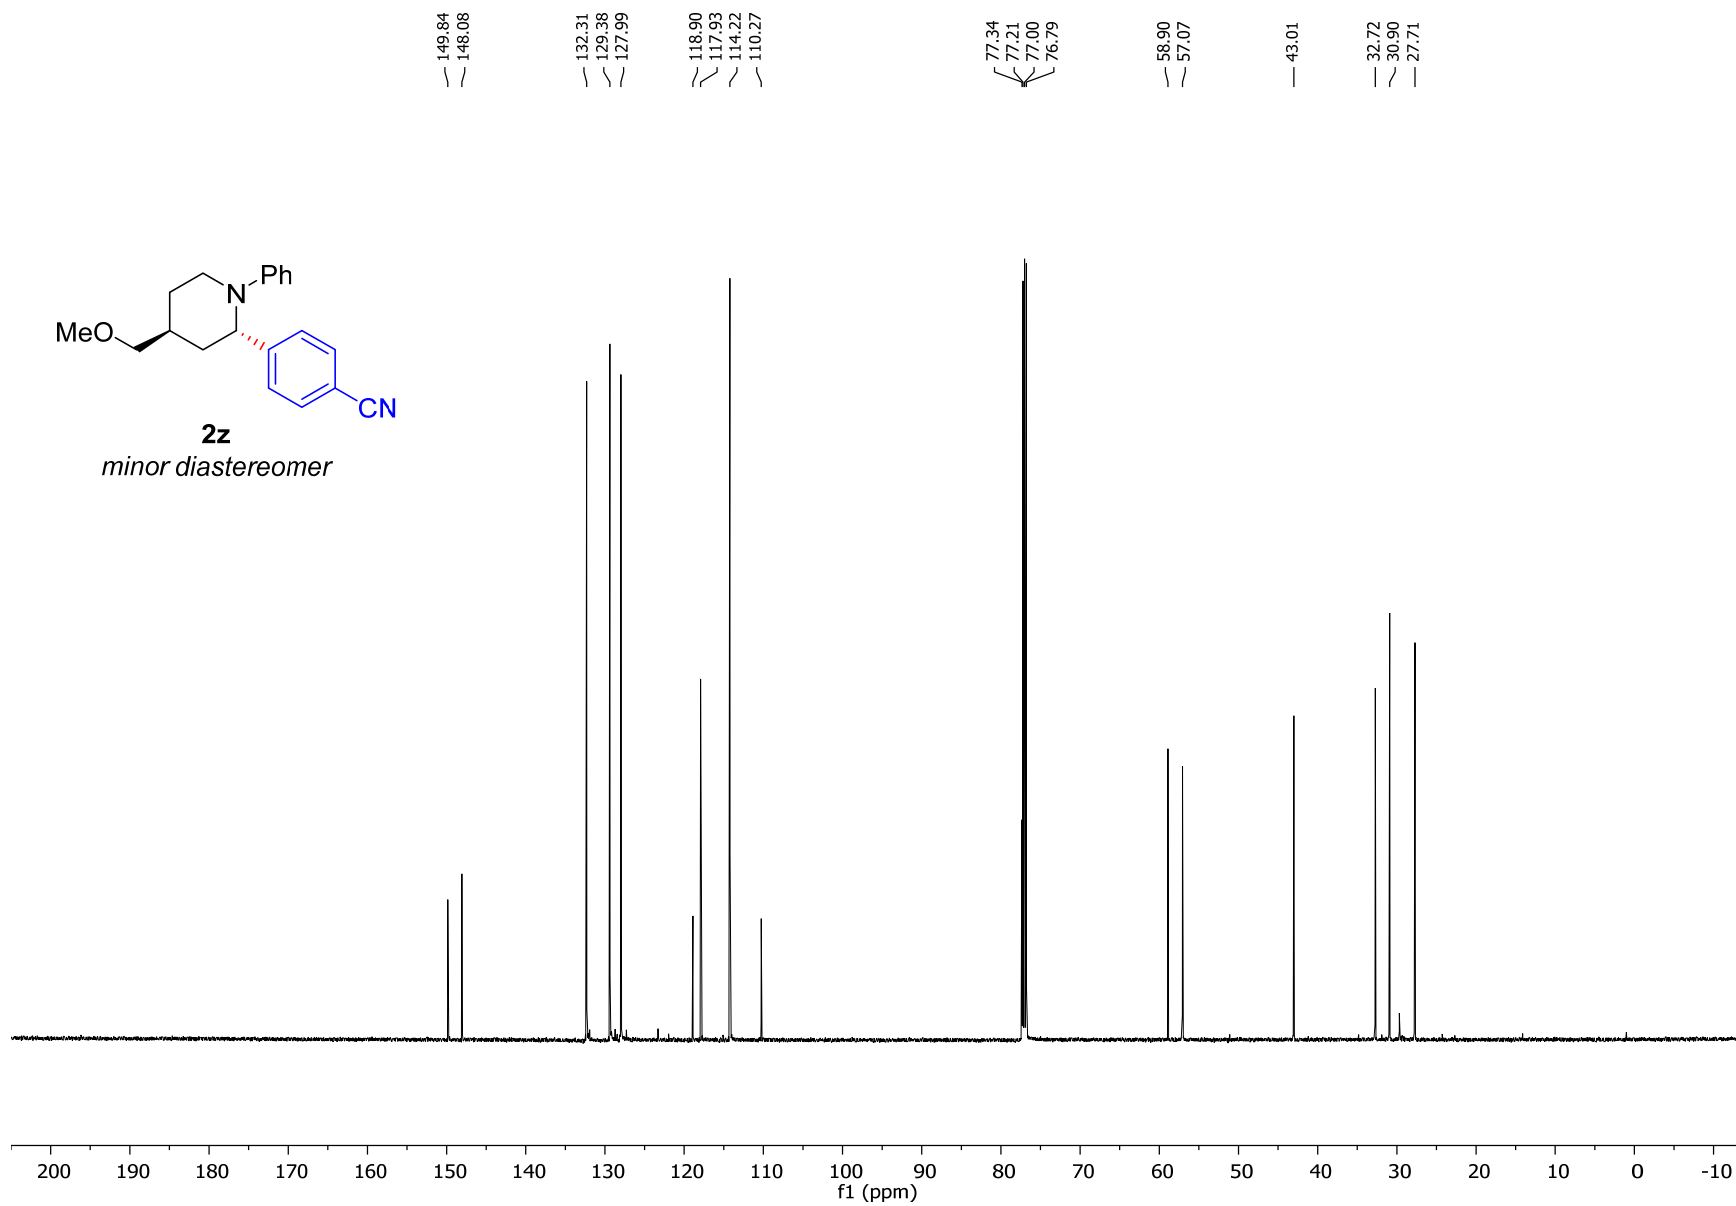

Supplement: NIHMS1588215-supplement-Supporting_Information.pdf [file NIHMS1588215-supplement-Supporting_Information.pdf]
